# Supplementary material
Source: PubMed Central journal article supplement (PMC4019734)
Supplement: NIHMS573148-supplement-Supp_FigureS1-S8.pdf [file NIHMS573148-supplement-Supp_FigureS1-S8.pdf]

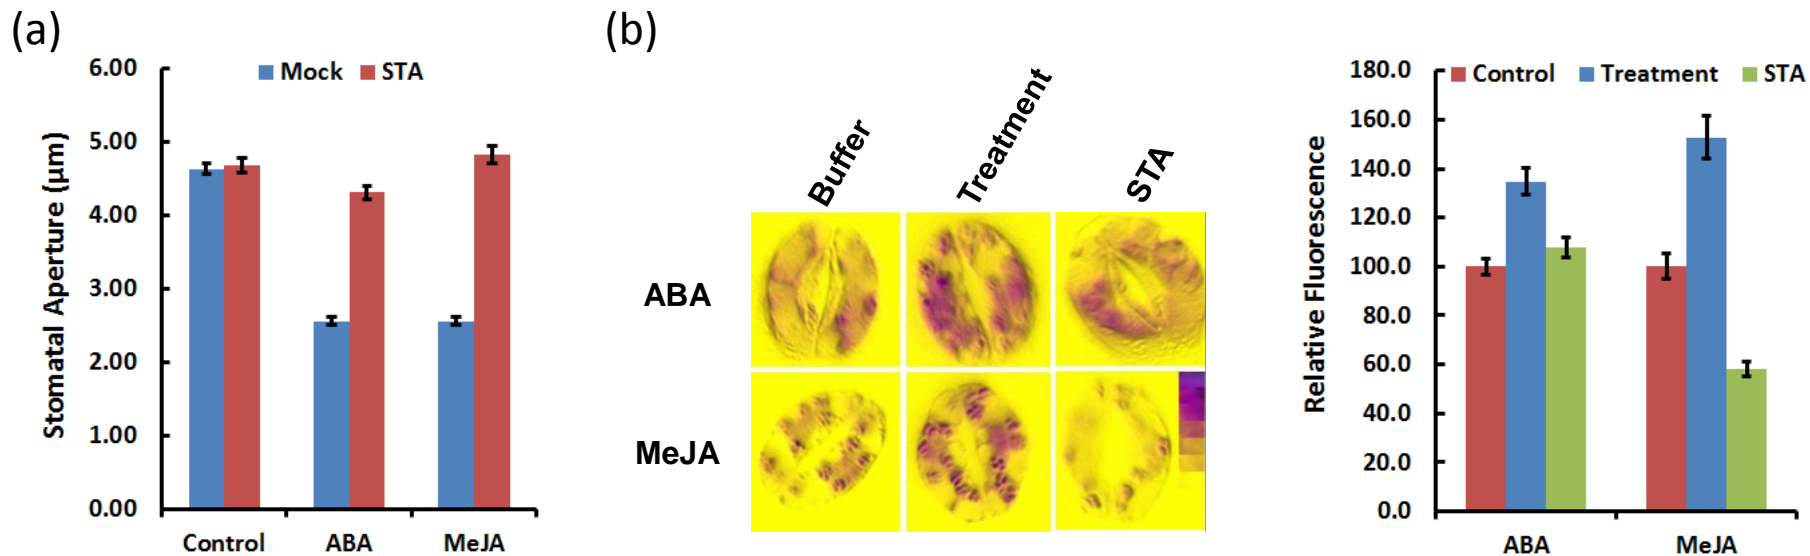

**Figure S1.** Effect of 2  $\mu\text{M}$  staurosporine (STA) on ABA/MeJA-induced stomatal closure and  $\text{H}_2\text{O}_2$  production. (a) STA abolishes ABA/MeJA induced closure. (b) STA inhibits ABA/MeJA elevated ROS levels. Left, representative stomatal images; right, quantitative data. The pseudocolor key beside the lower right stomatal image indicates the increase of the fluorescence from bottom to top. At least 60 stomata were analyzed in each experiment and three replicate experiments were conducted. The quantitative data are shown as average  $\pm$  standard deviation.

## Figure S2

### **MS/MS spectra of ICAT identified ABA responsive cysteines**

Twenty seven cysteines were mapped from ABA treated guard cells. The precursor of the cysteine-containing peptide and the fragmented ions were shown as the evidence for mapping.

# Ribulose biphosphate carboxylase large chain precursor

## GRPLLGCTIKPK

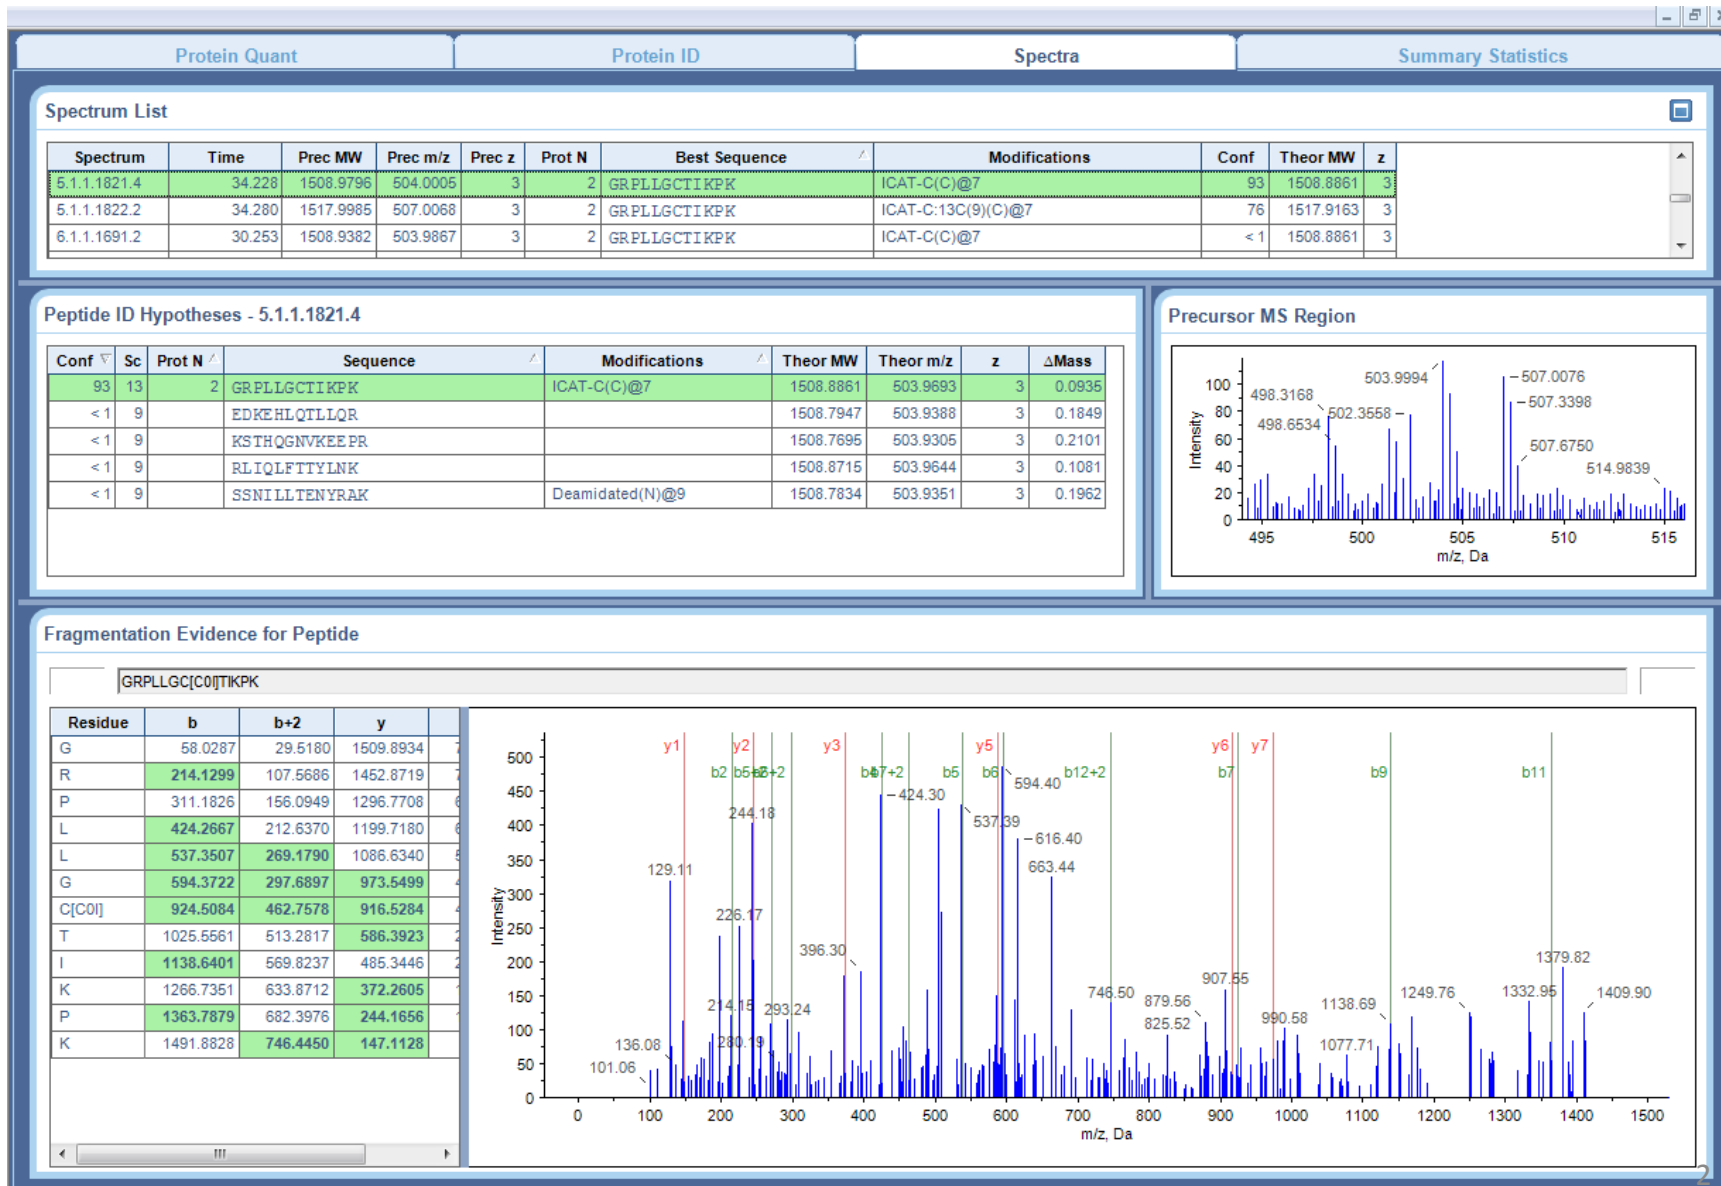

# Ribulose biphosphate carboxylase large chain precursor CYHIEPVPGEETQFIAY

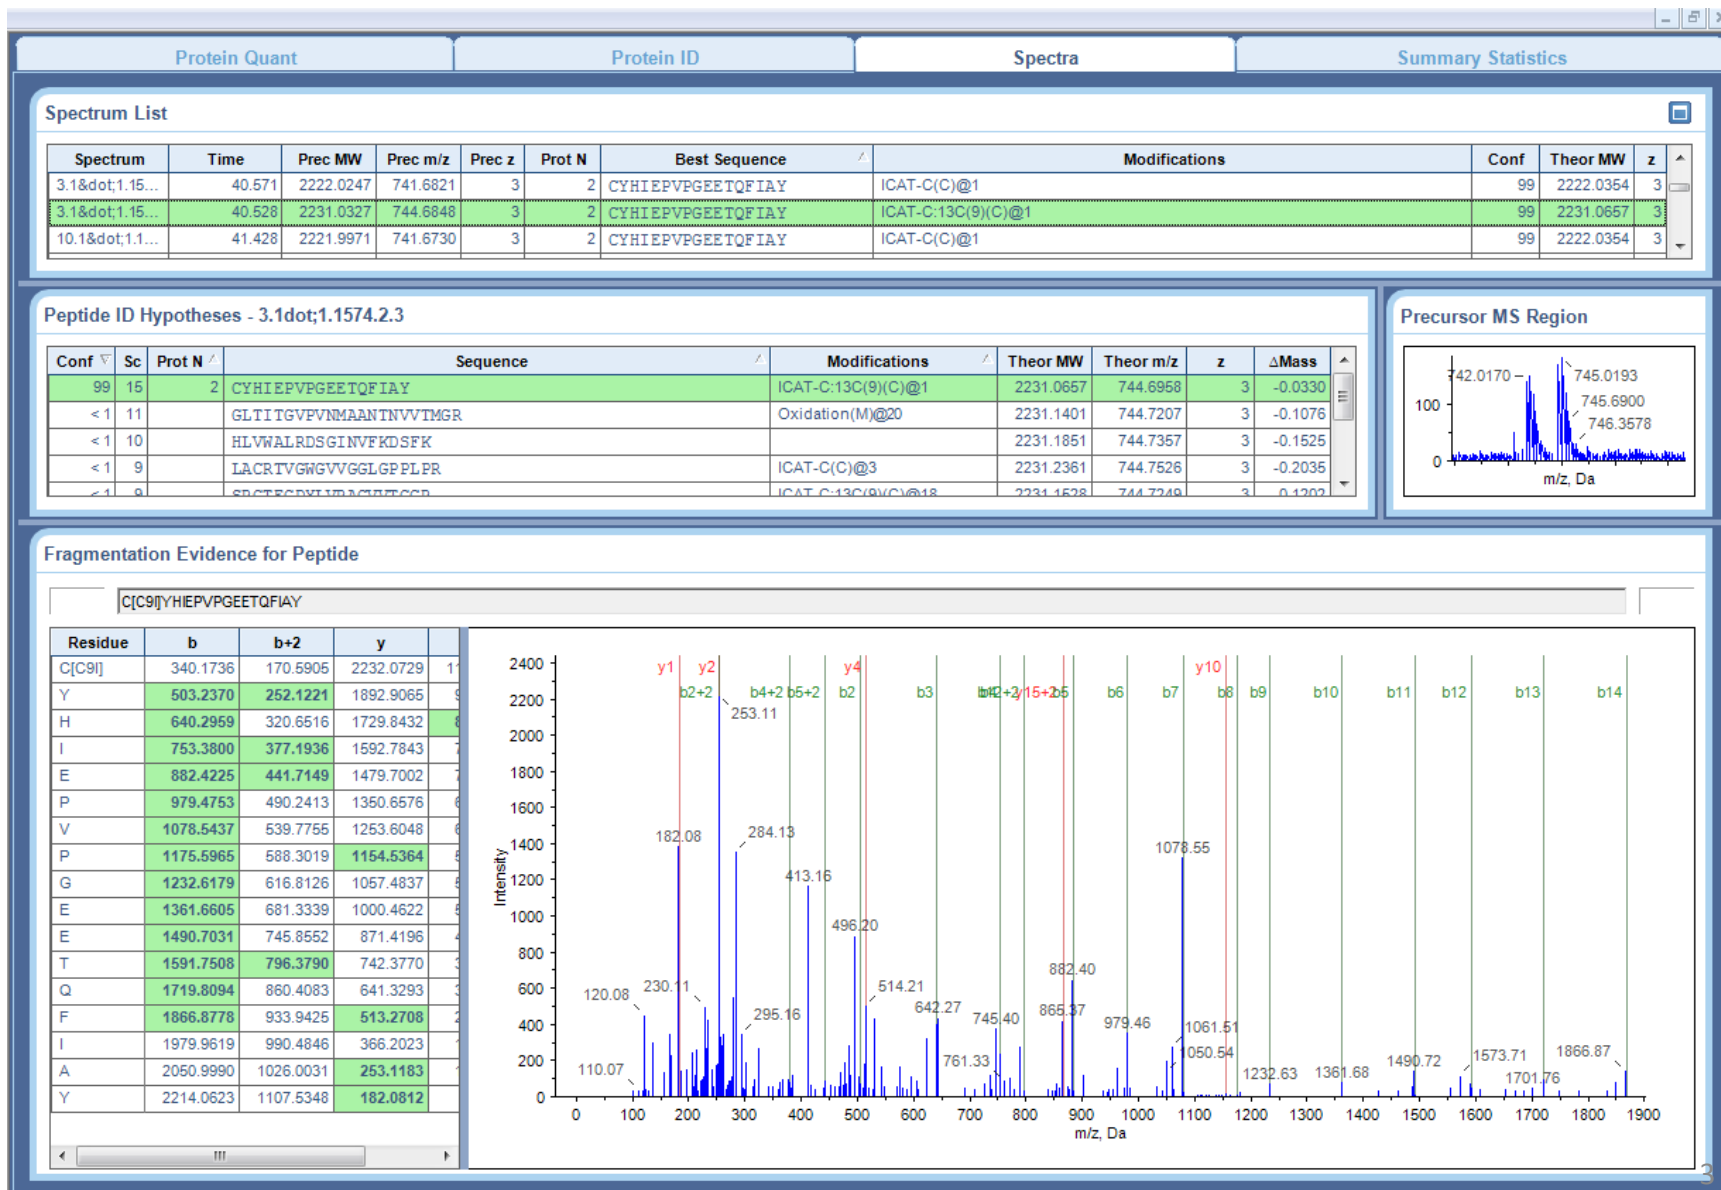

# Ribulose biphosphate carboxylase large chain precursor

## VALEACVQAR

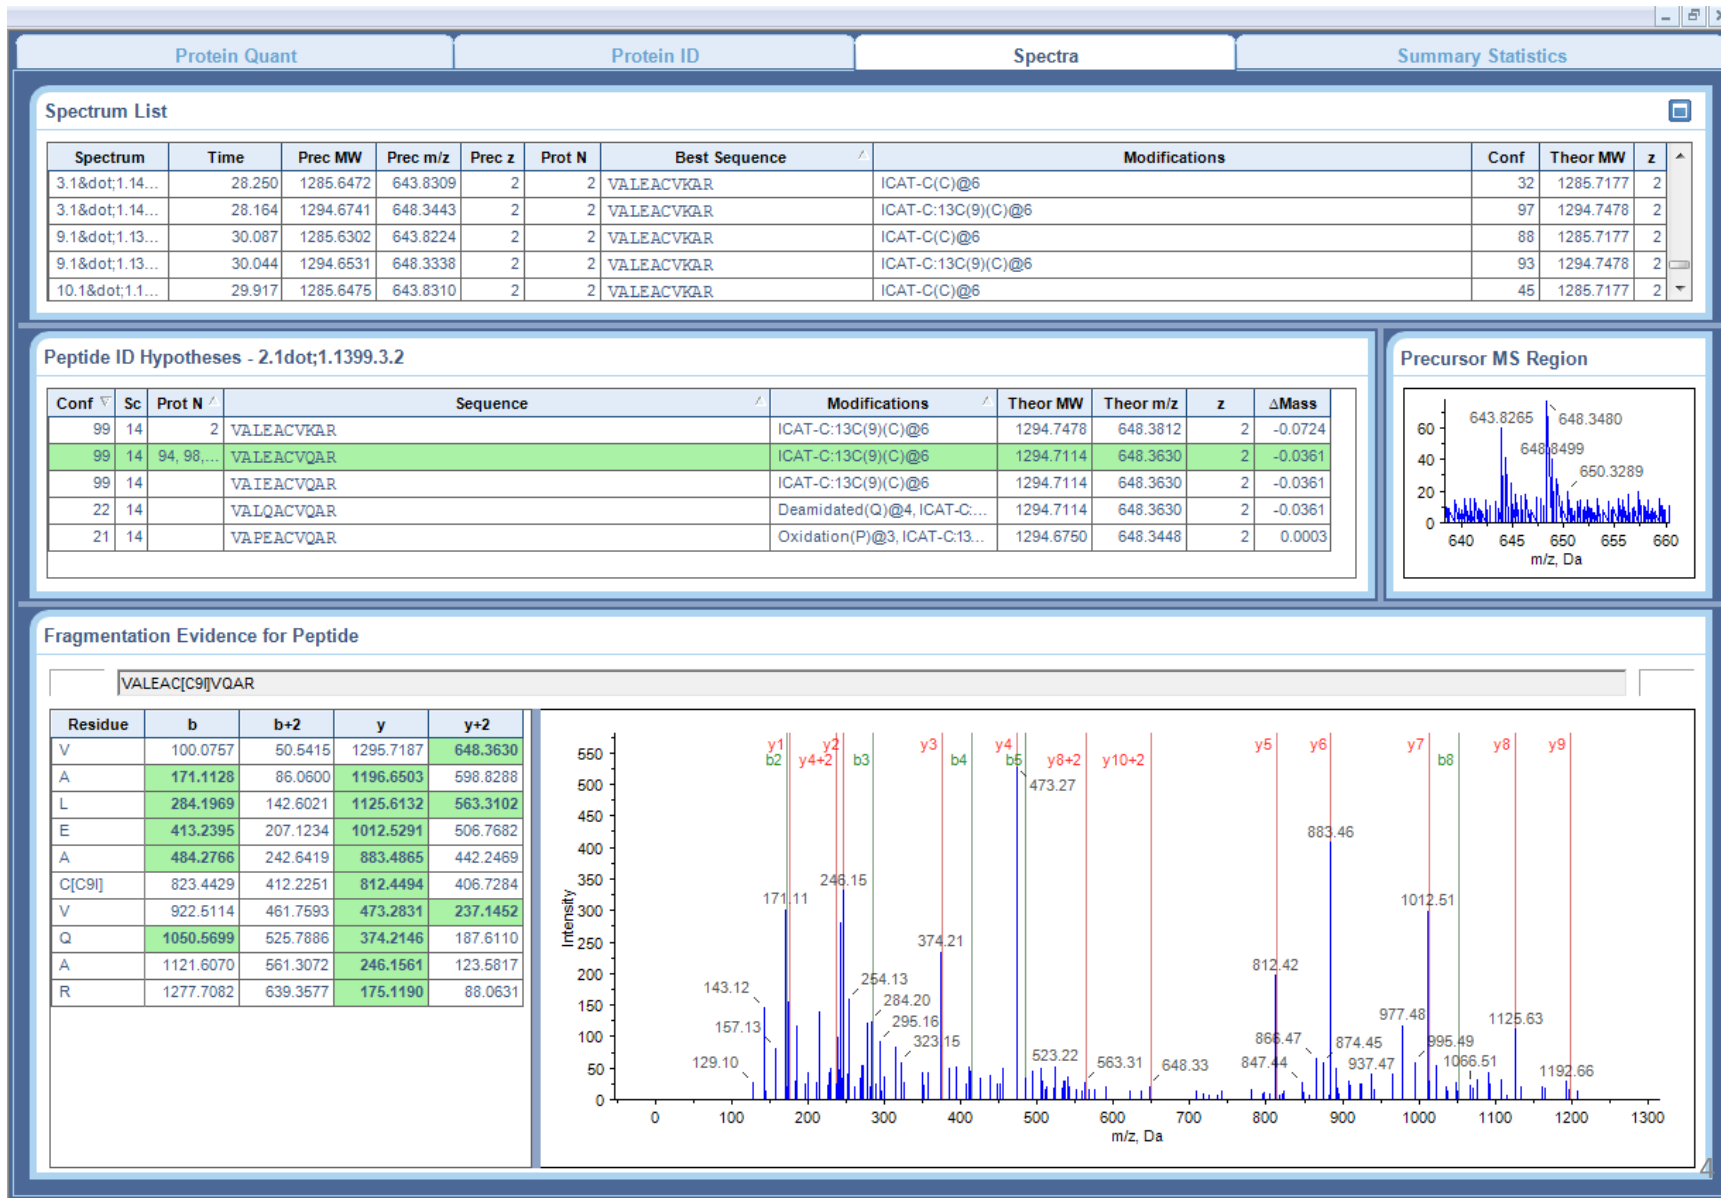

# Ribulose biphosphate carboxylase large chain precursor

## WSP~~E~~LAAACEVWK

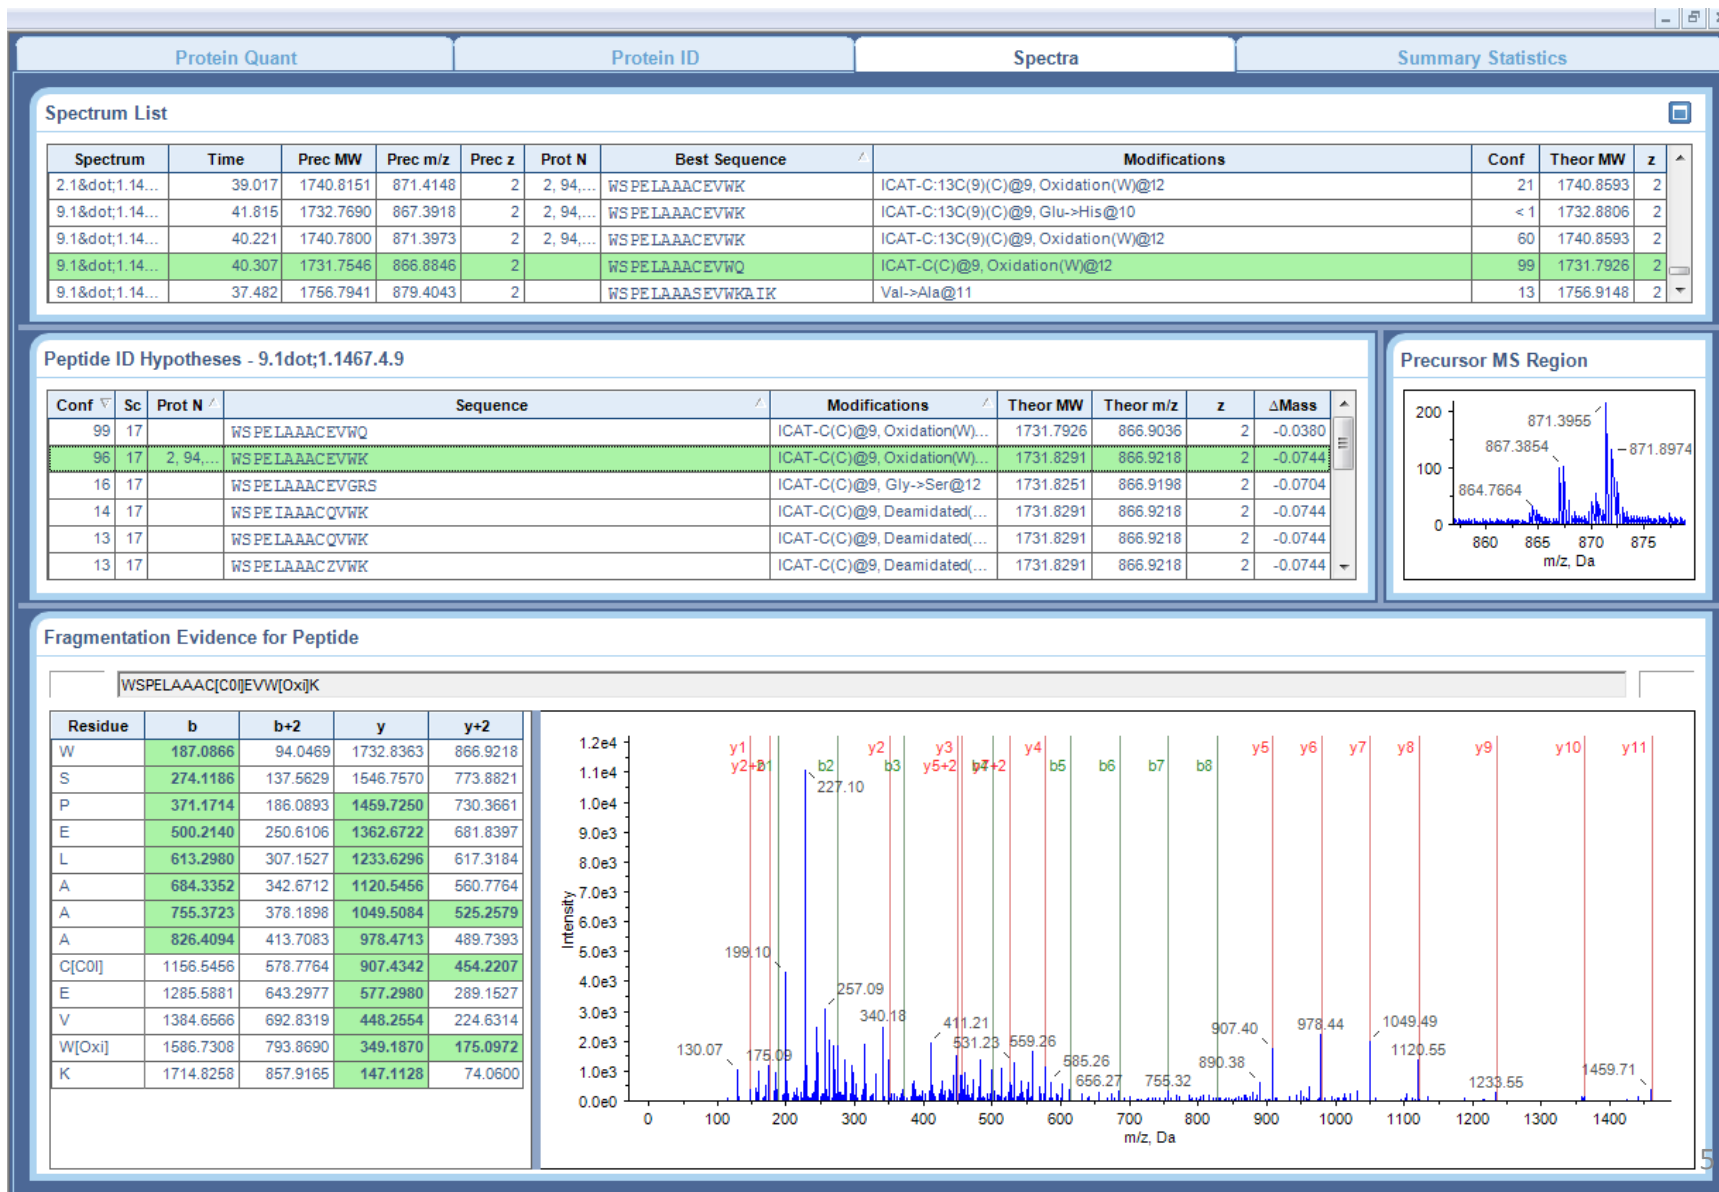

# Ribulose biphosphate carboxylase large chain precursor

## YGRPLLGCTIKPK

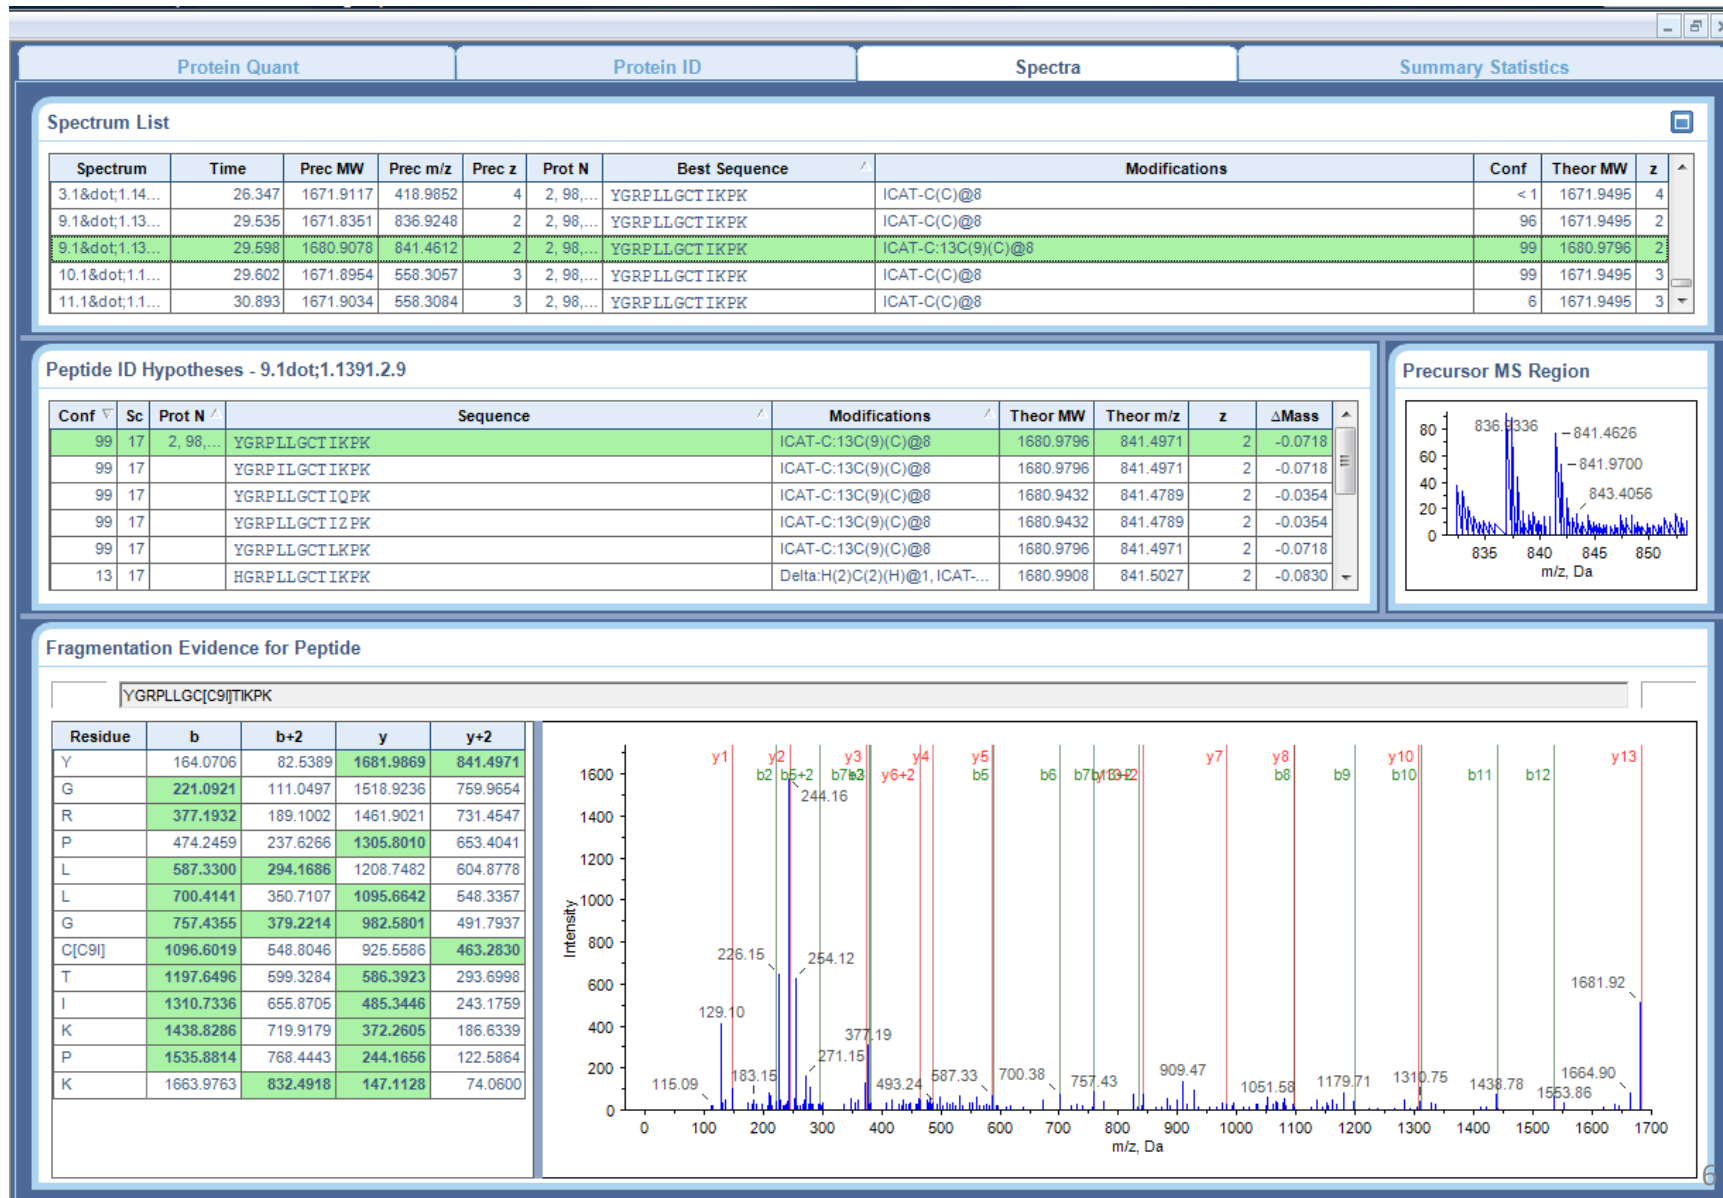

# Ribulose biphosphate carboxylase large chain precursor GHYLNATAGTCEEMMK

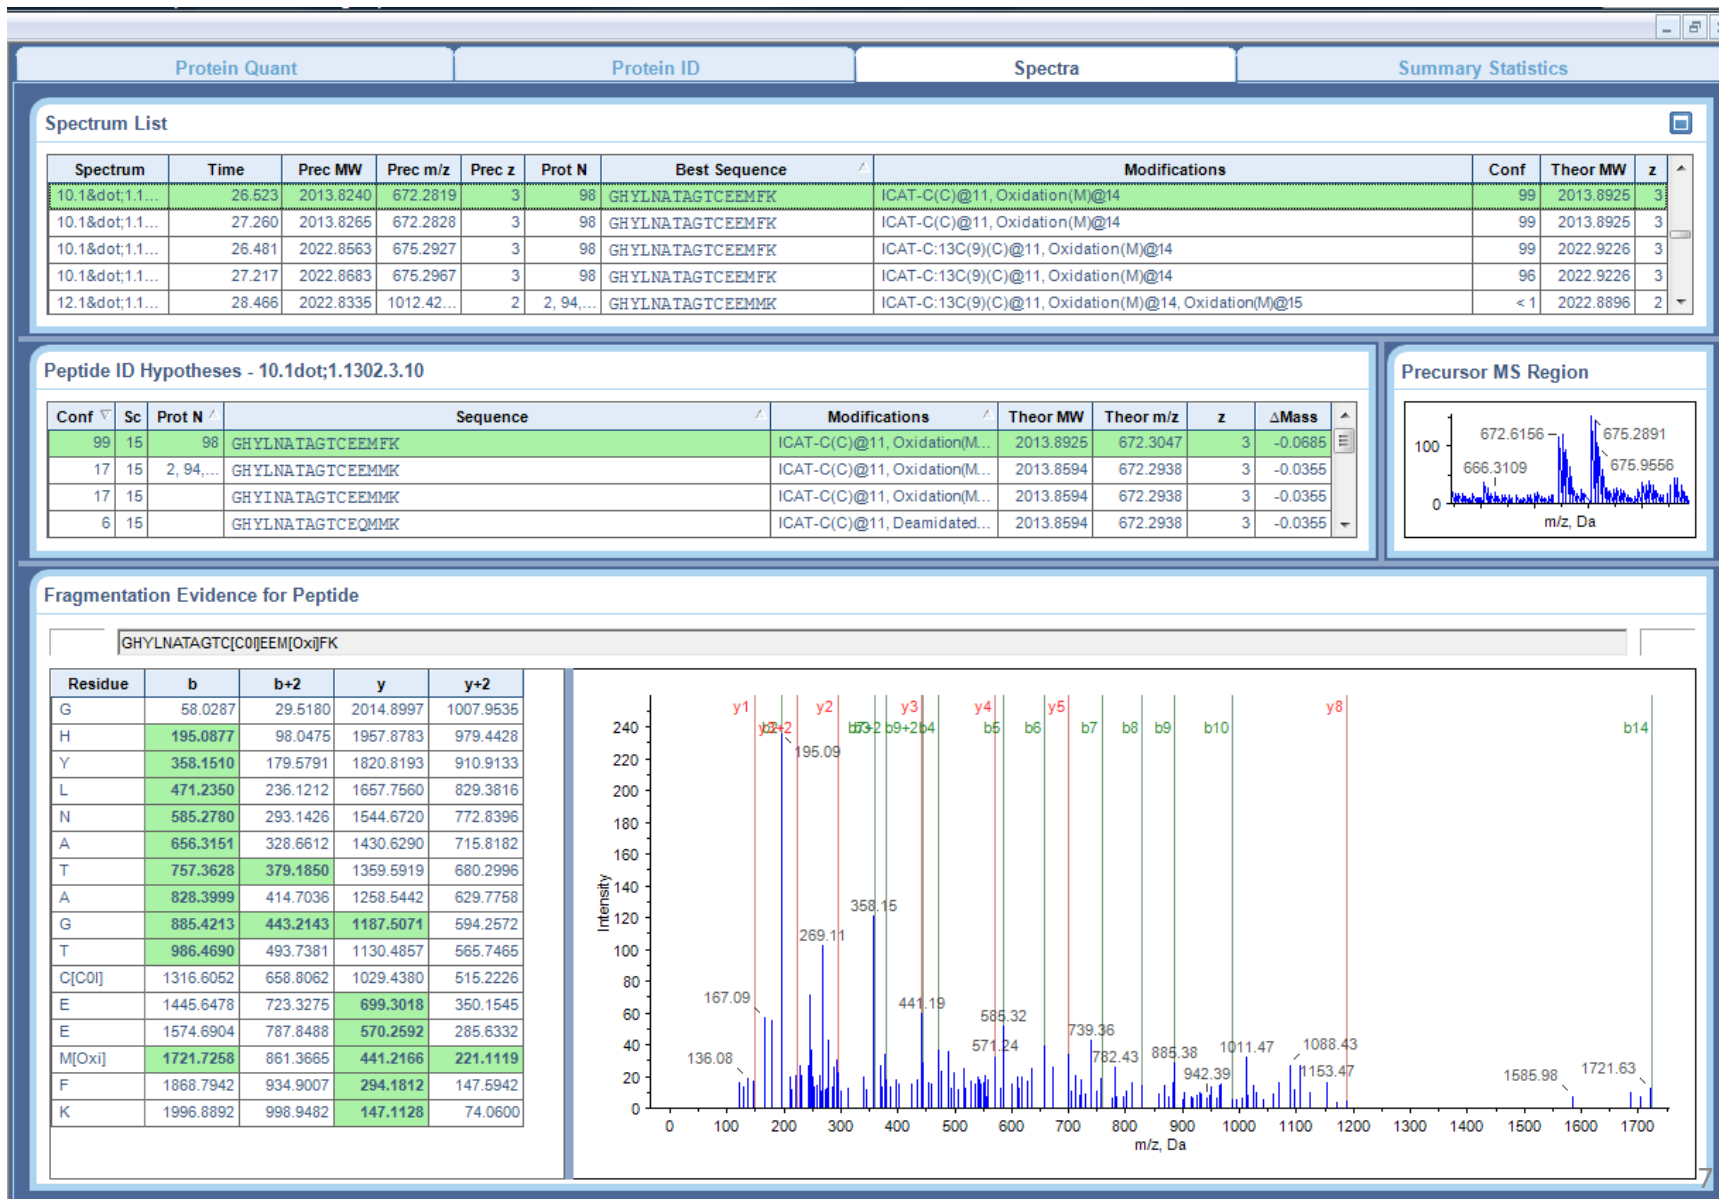



# Ferredoxin

## FITPEGEQEVECD<sup>1</sup>DDVYVLDA<sup>2</sup>EEAGIDLPYSC<sup>3</sup>R

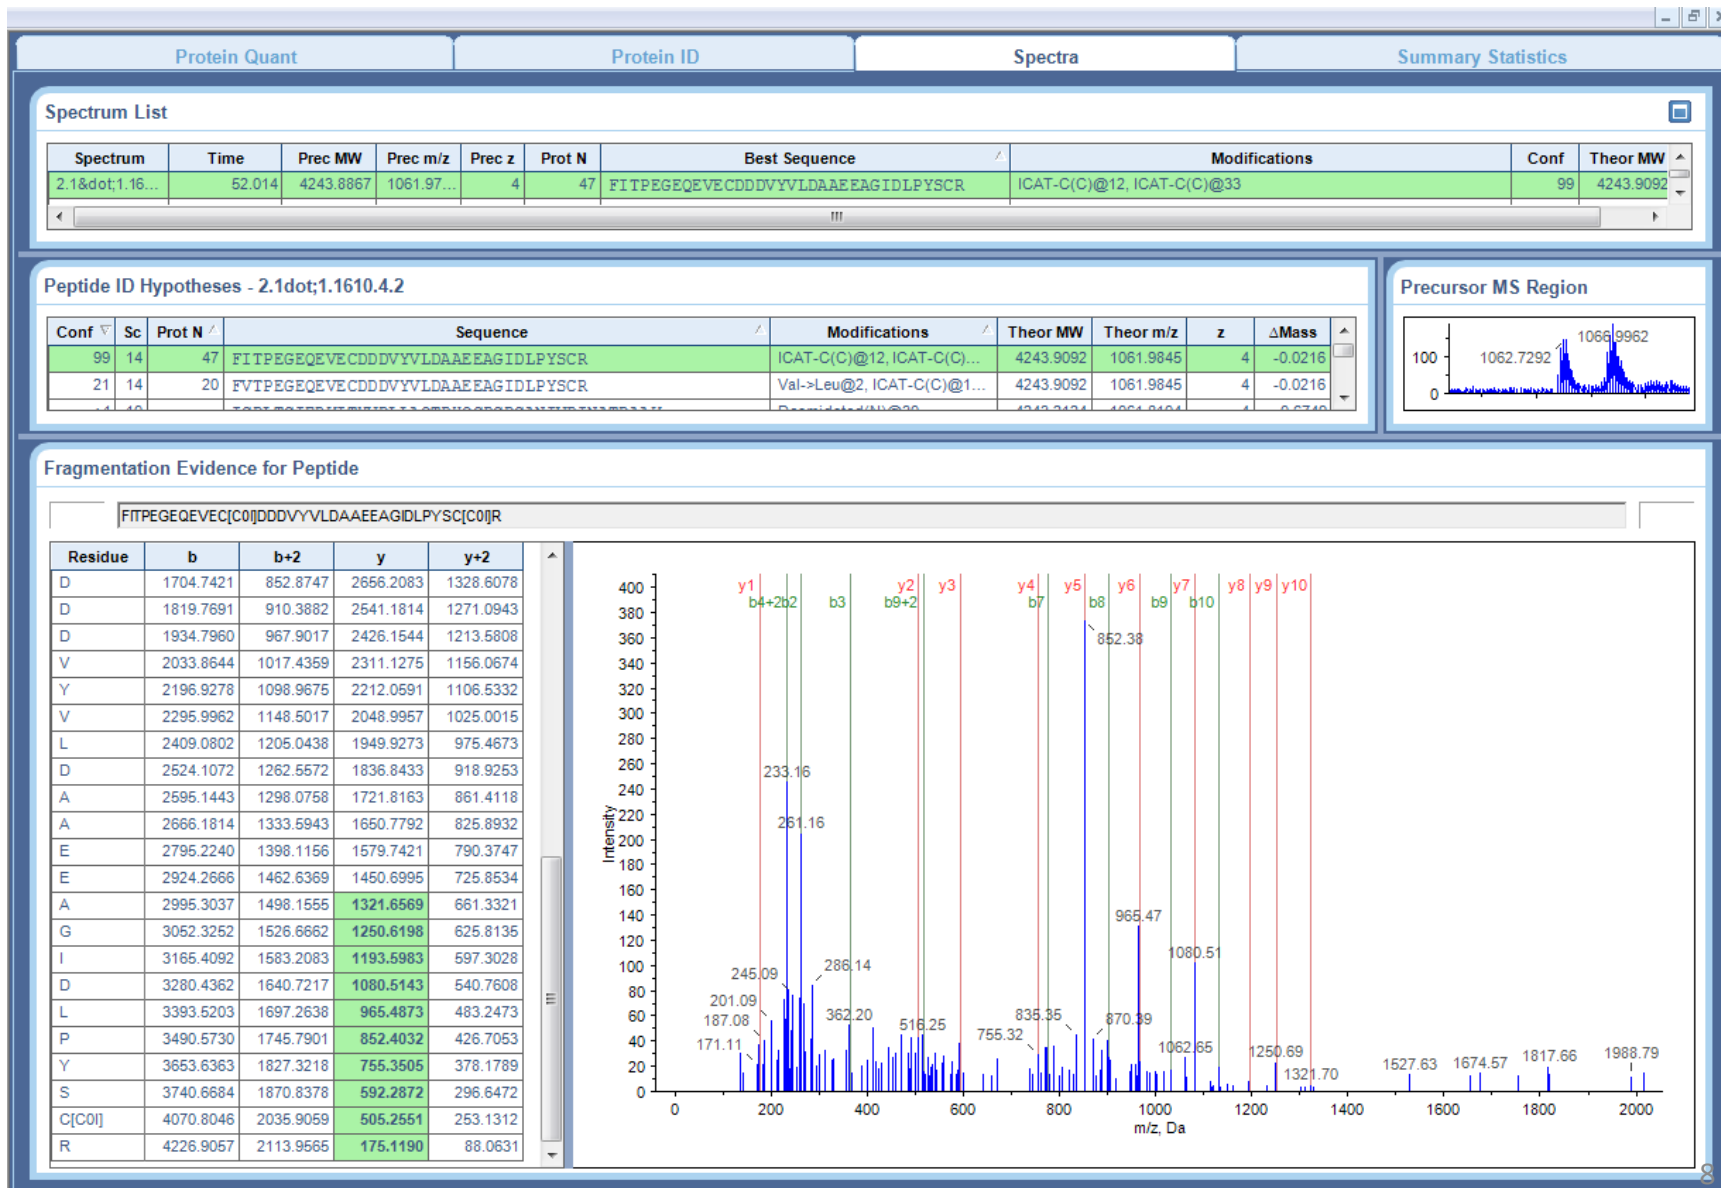

# Ribulose biphosphate carboxylase /oxygenase small subunit WIPCVEFELEHG**F**VYR

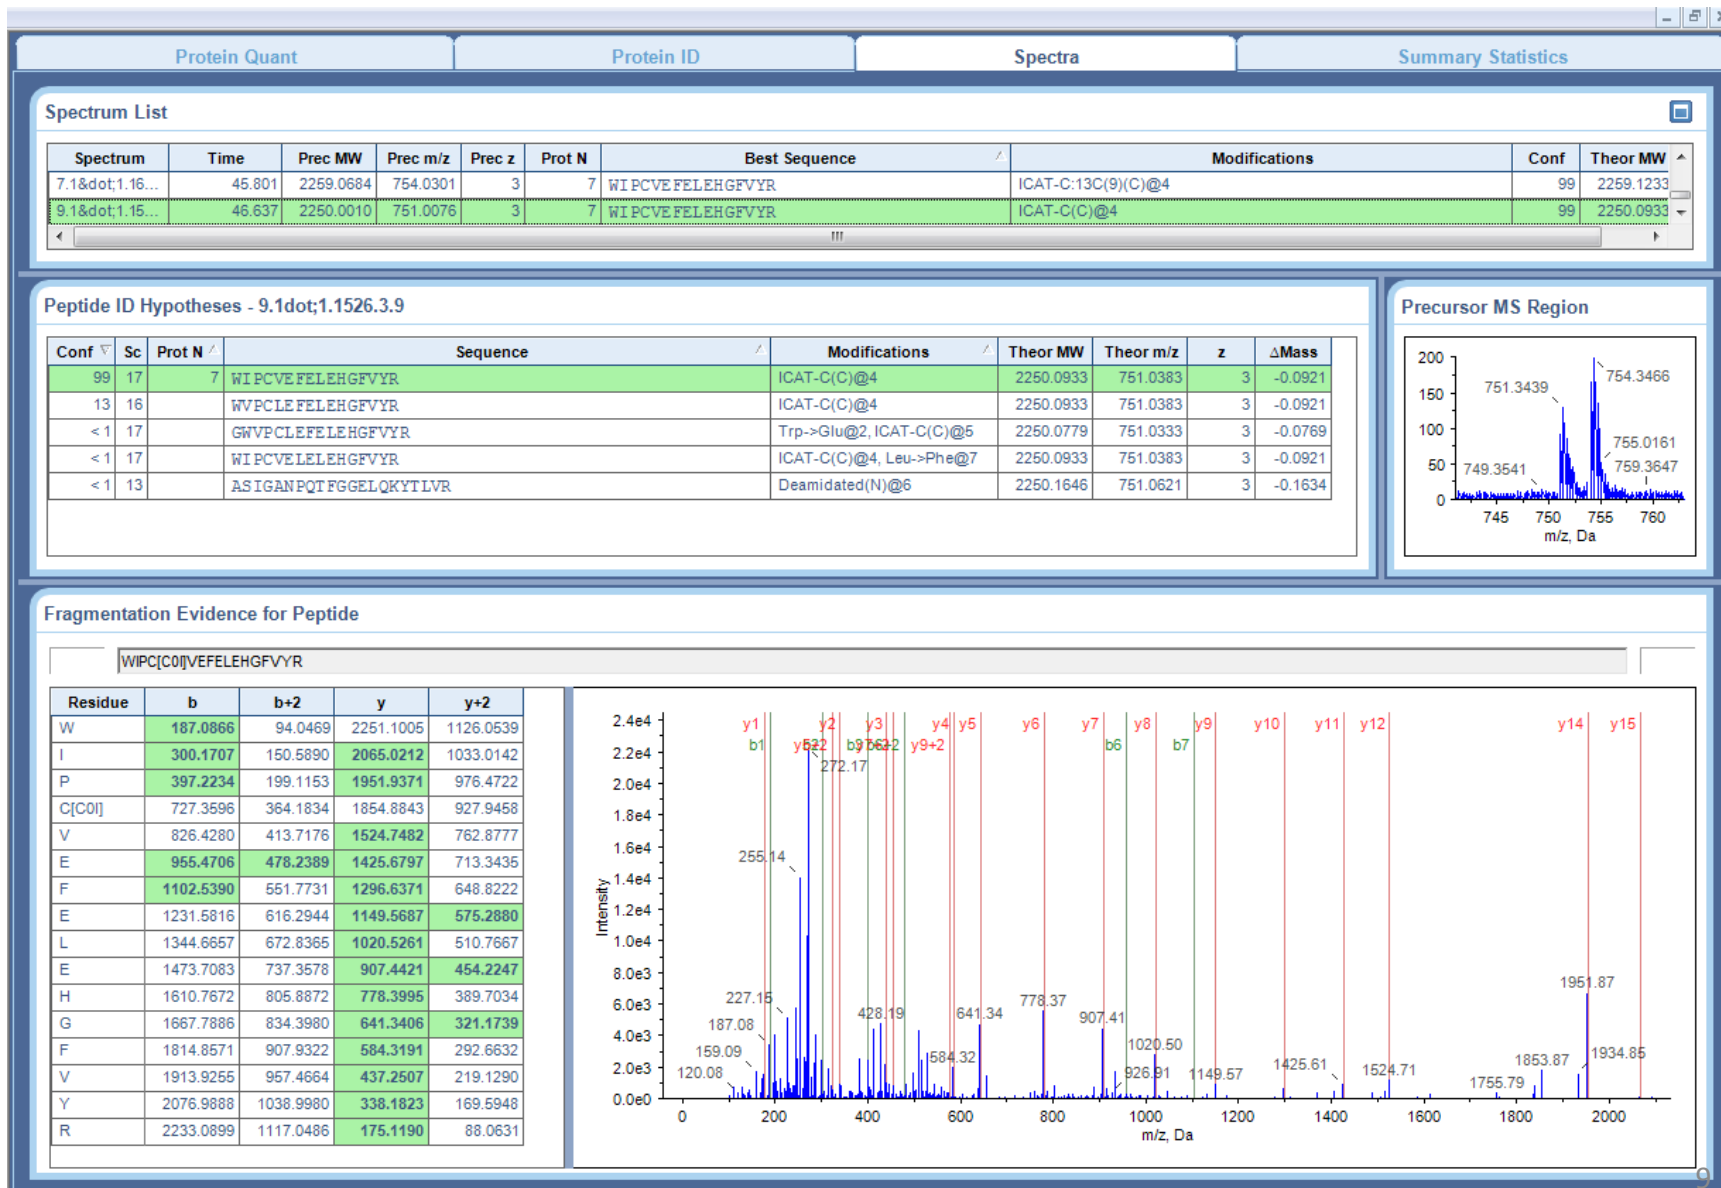

# Malate dehydrogenase, mitochondrial precursor GLNGVPDVVECSYVQSTITELPFFASK

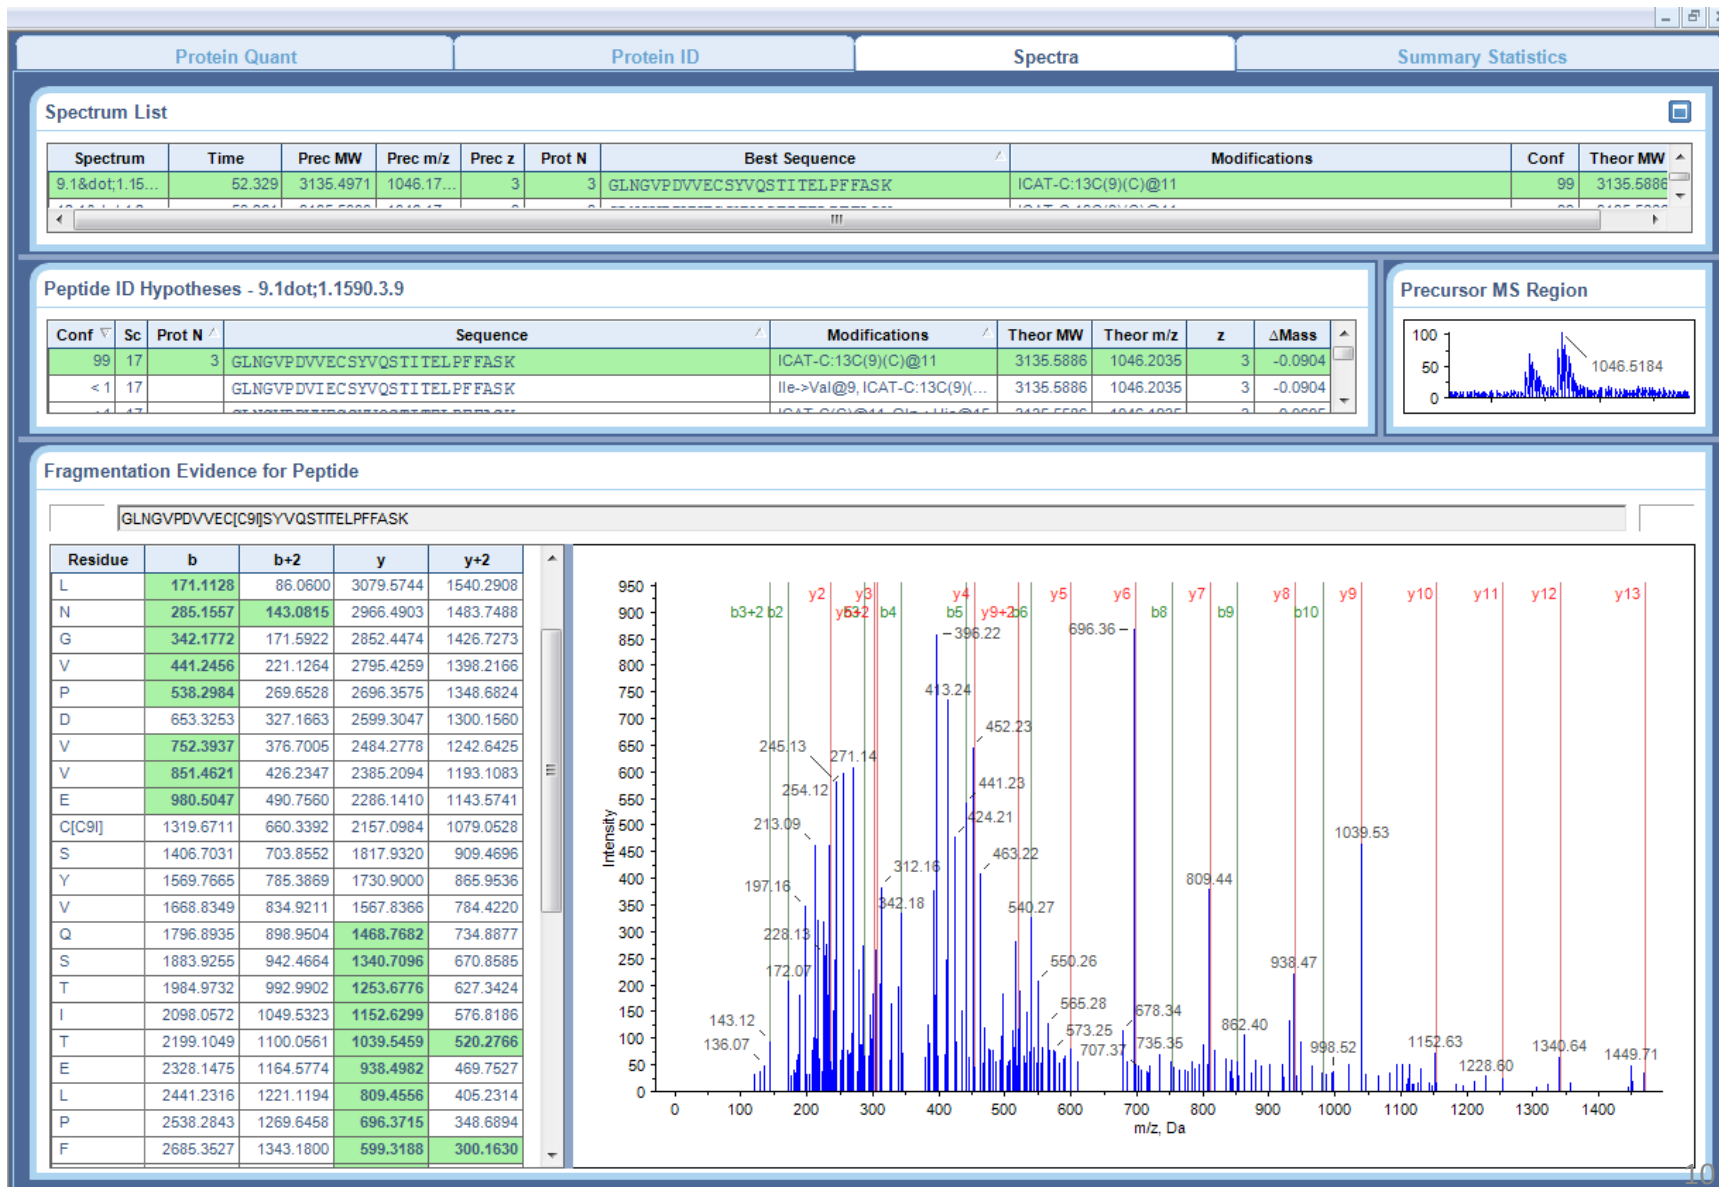

# Cytosolic triosephosphatisomerase IIYGGSVNGGNCK

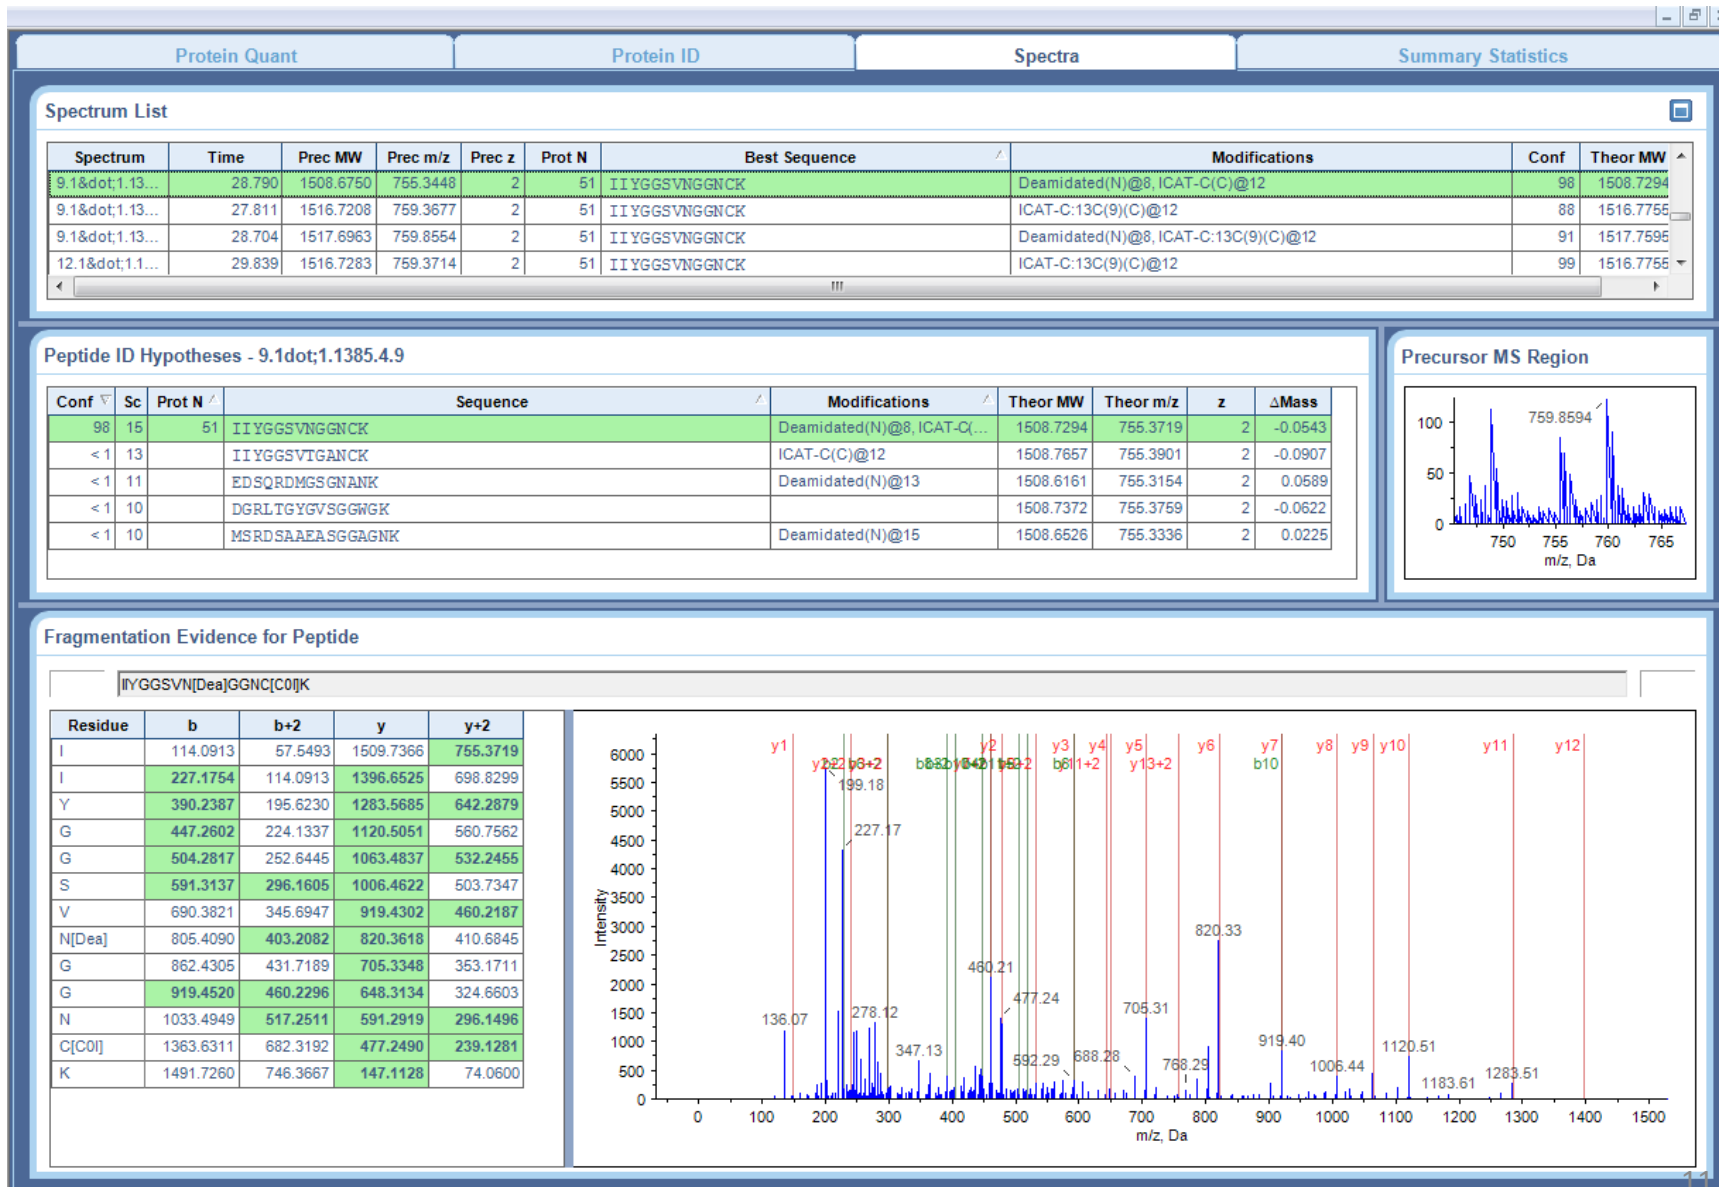

# Succinate dehydrogenase flavoprotein alpha subunit AAIGLSEHGFNTACITK

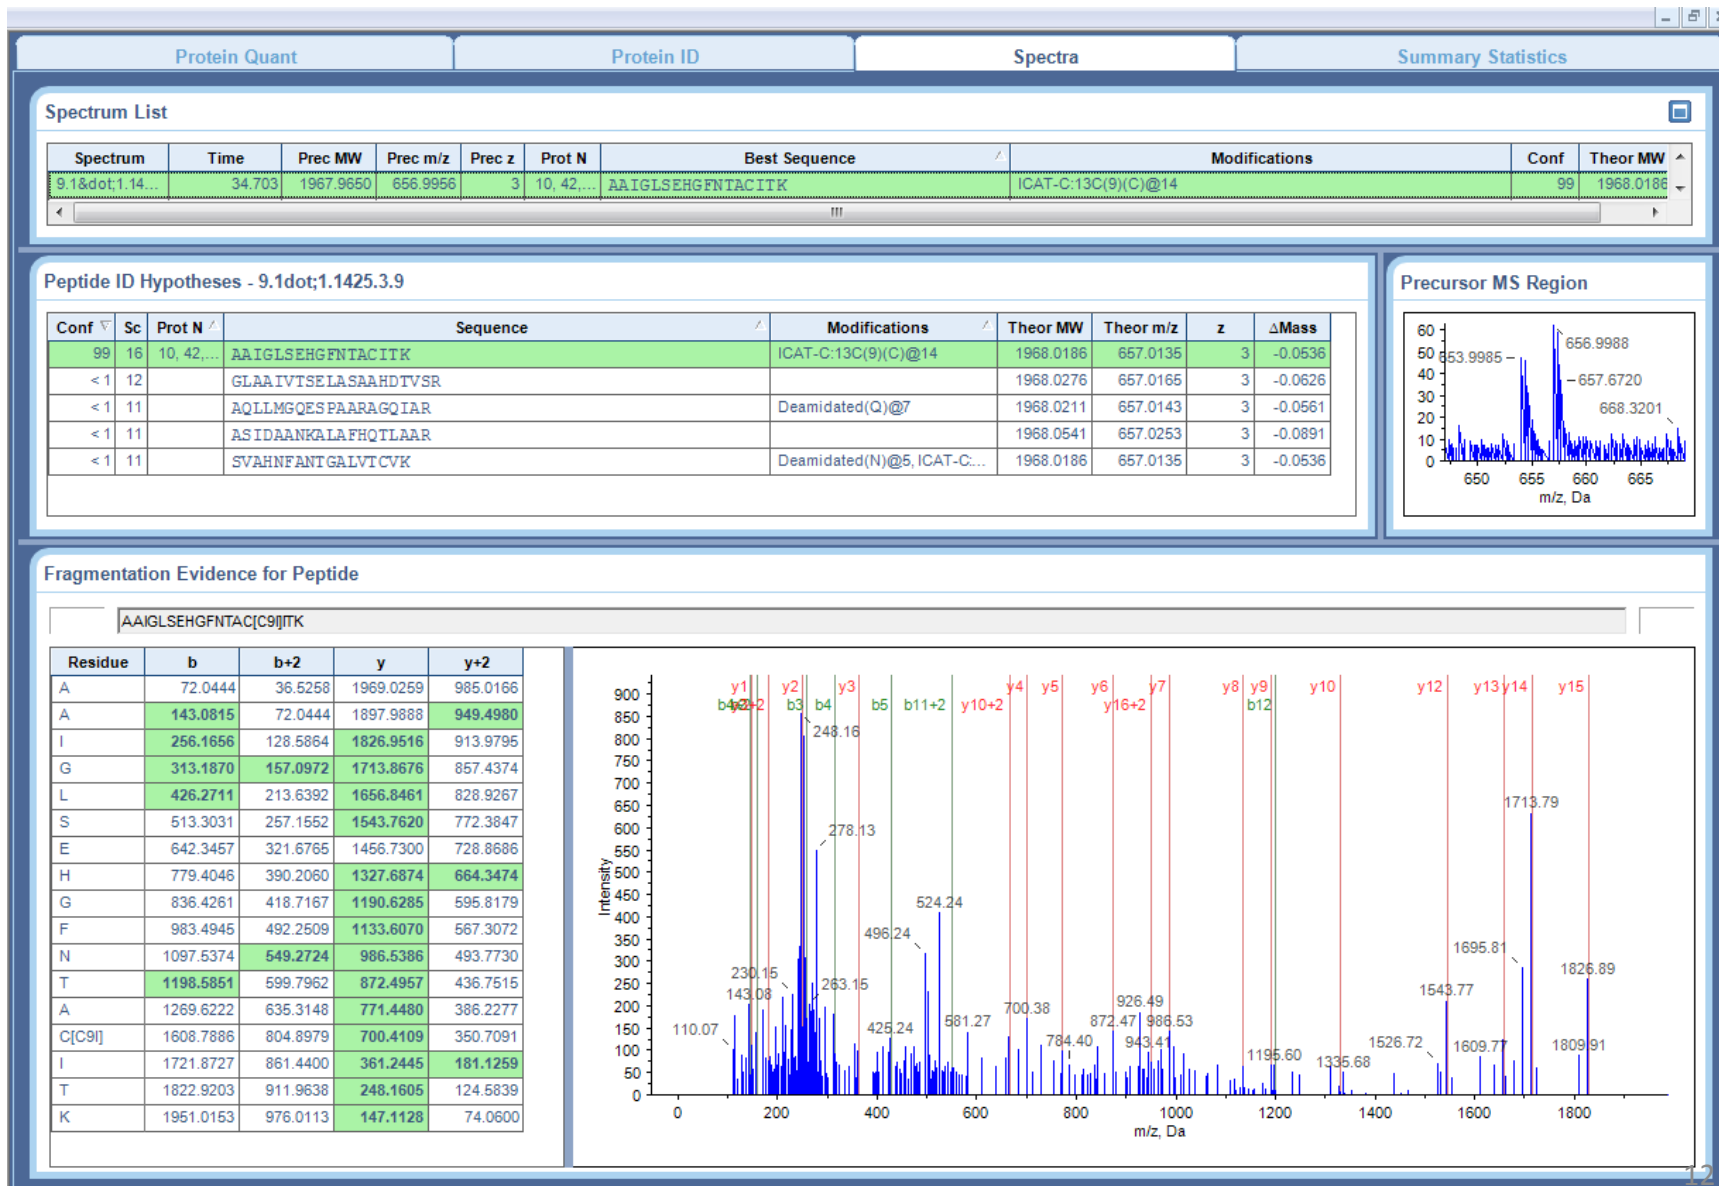

# Vacuolar ATP synthase subunit A (VHA-A) YNSDAVVYVGCGER

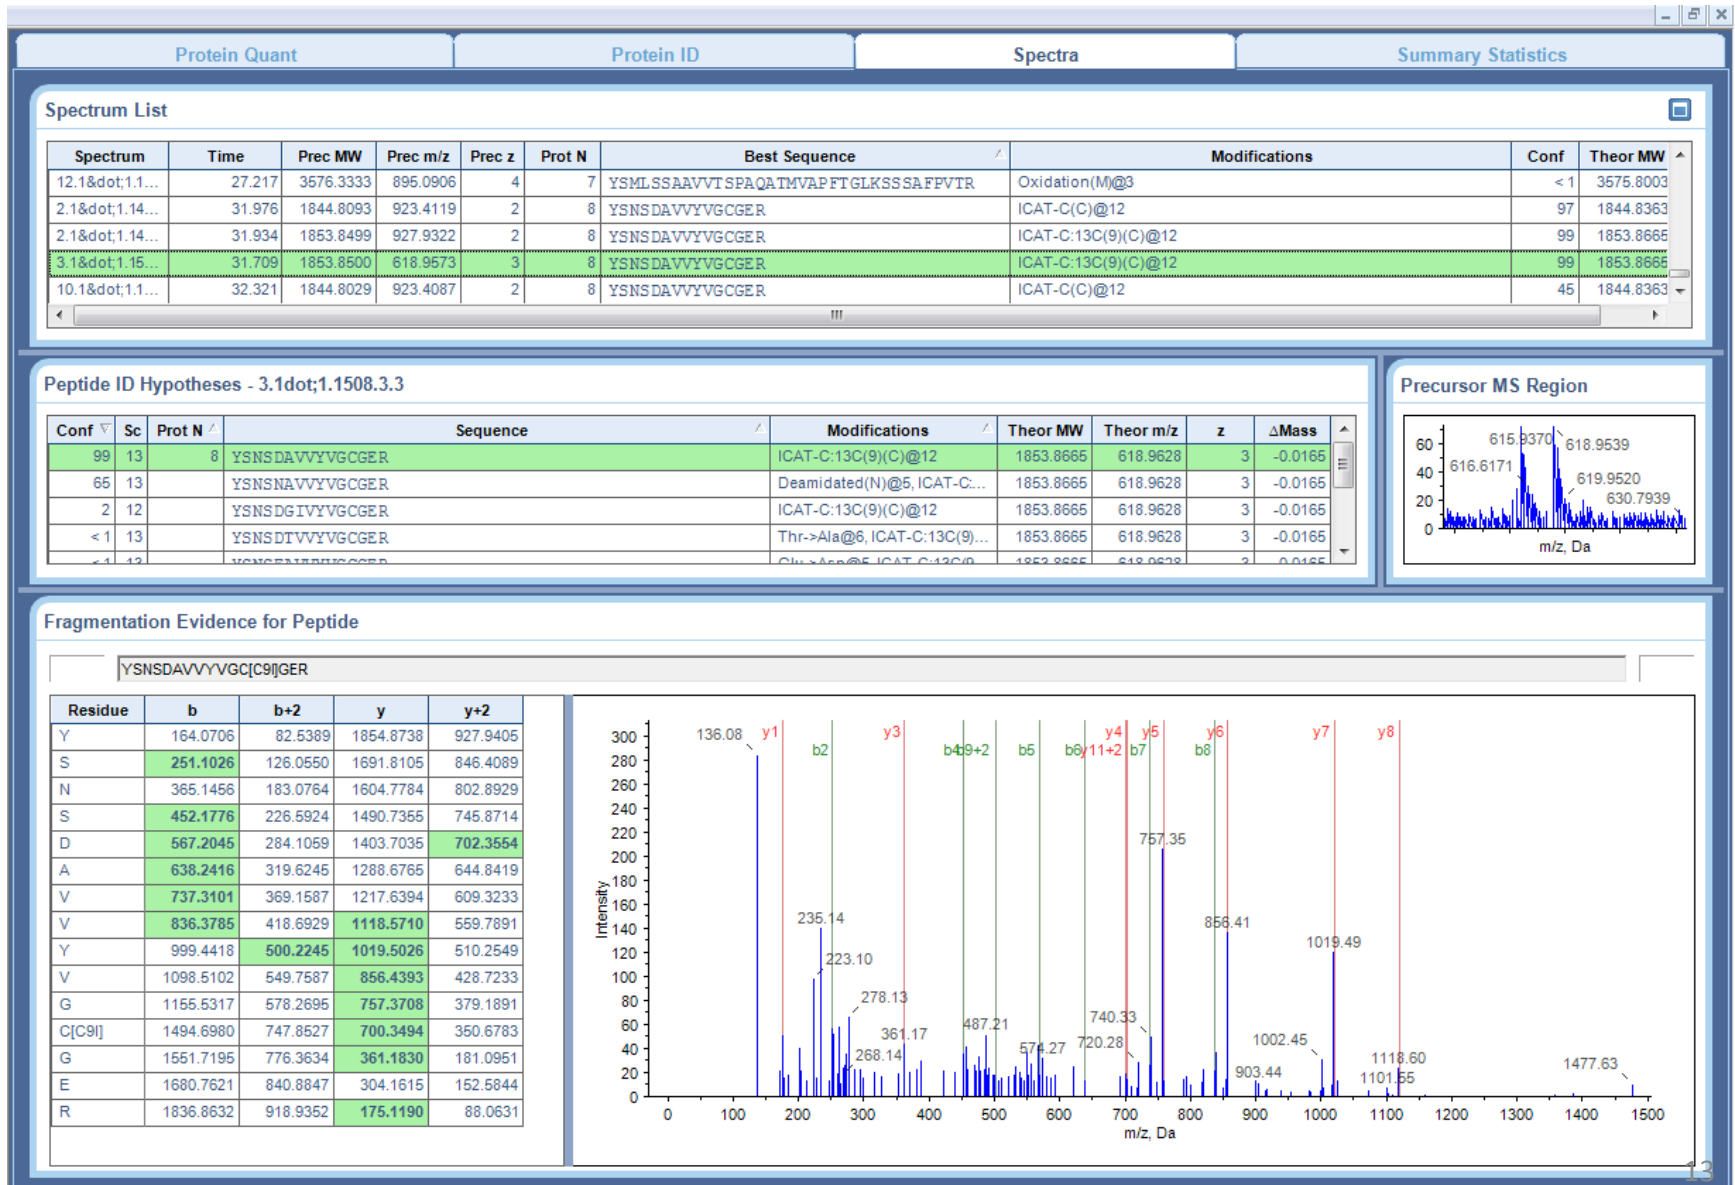

# Glyceraldehyde-3-phosphate dehydrogenase C subunit (GapC) SDLIVSNASCTTTNCLAPLAK

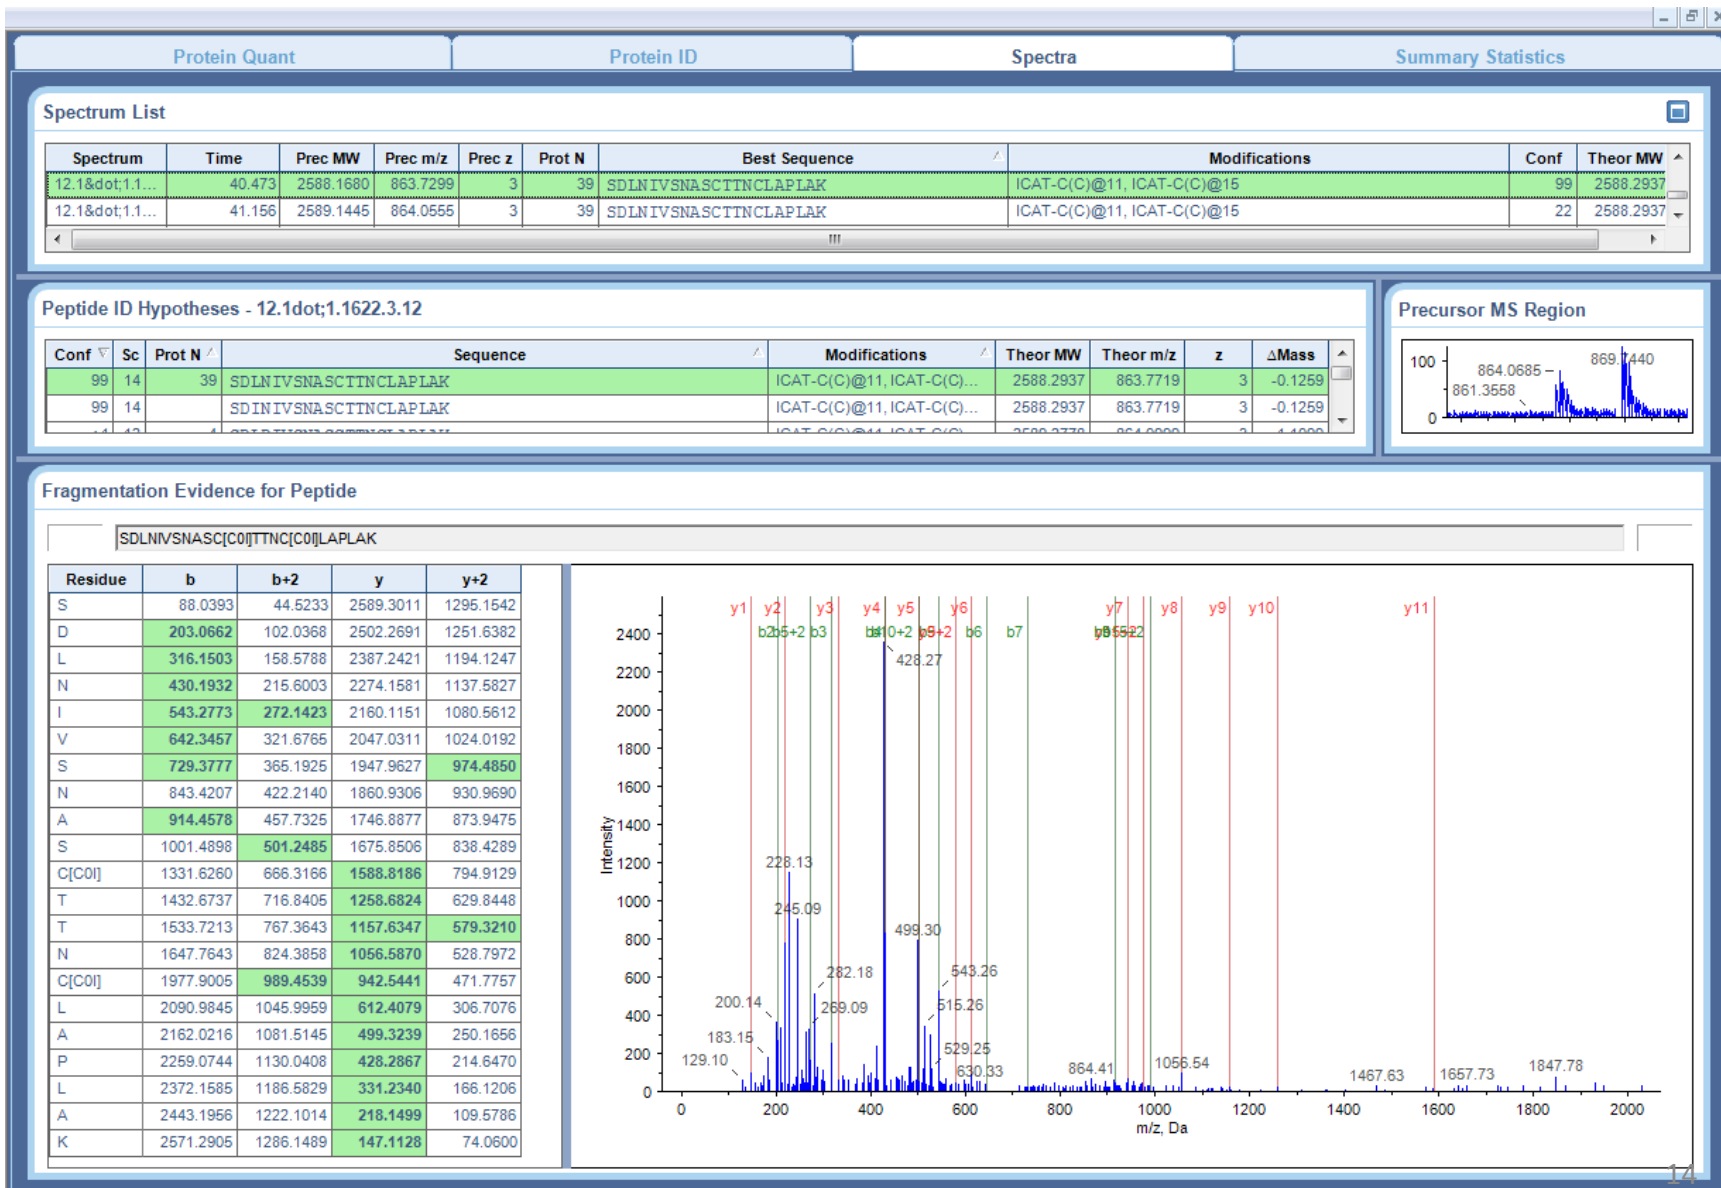

# Putative transitional endoplasmic reticulum ATPase QSAPCVLFFDELDSIATQR

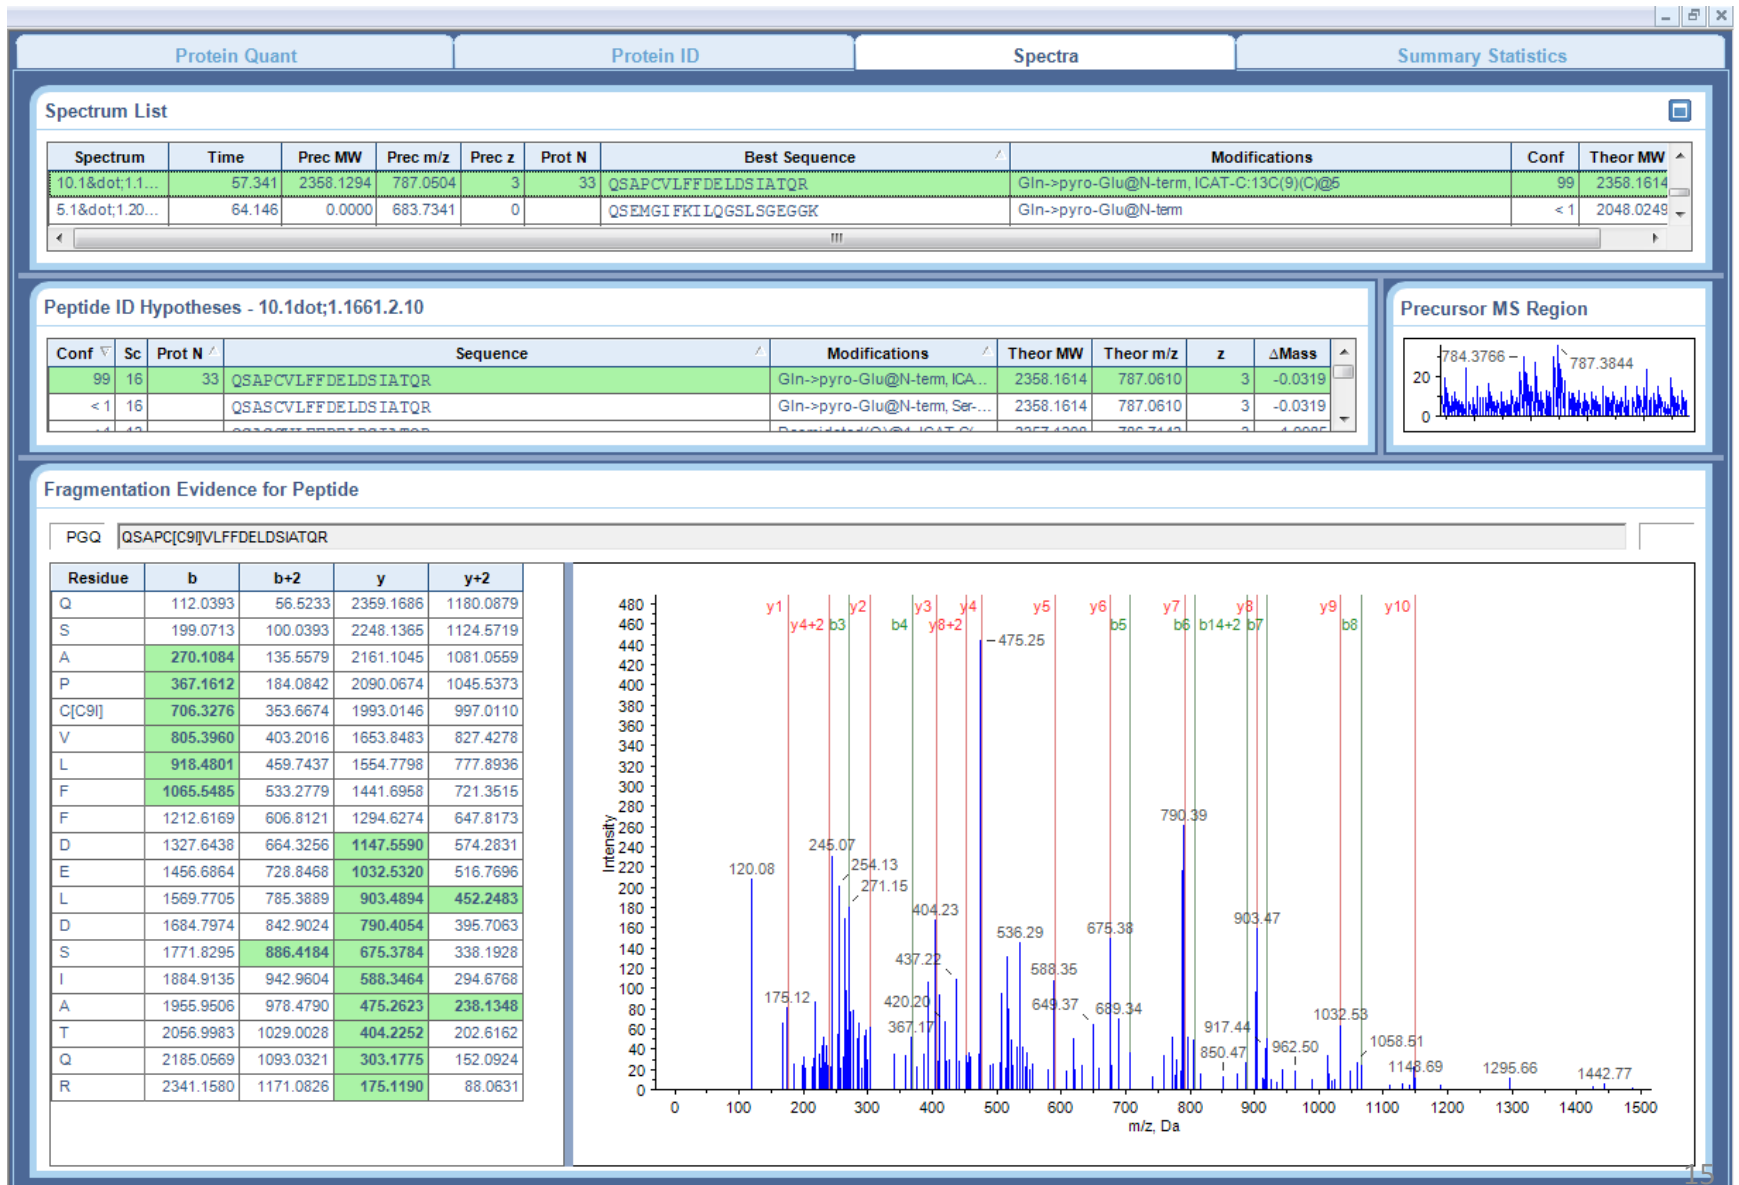



# Reversibly glycosylated polypeptide-1 NLLCPSTPFFFNTLYDPYR

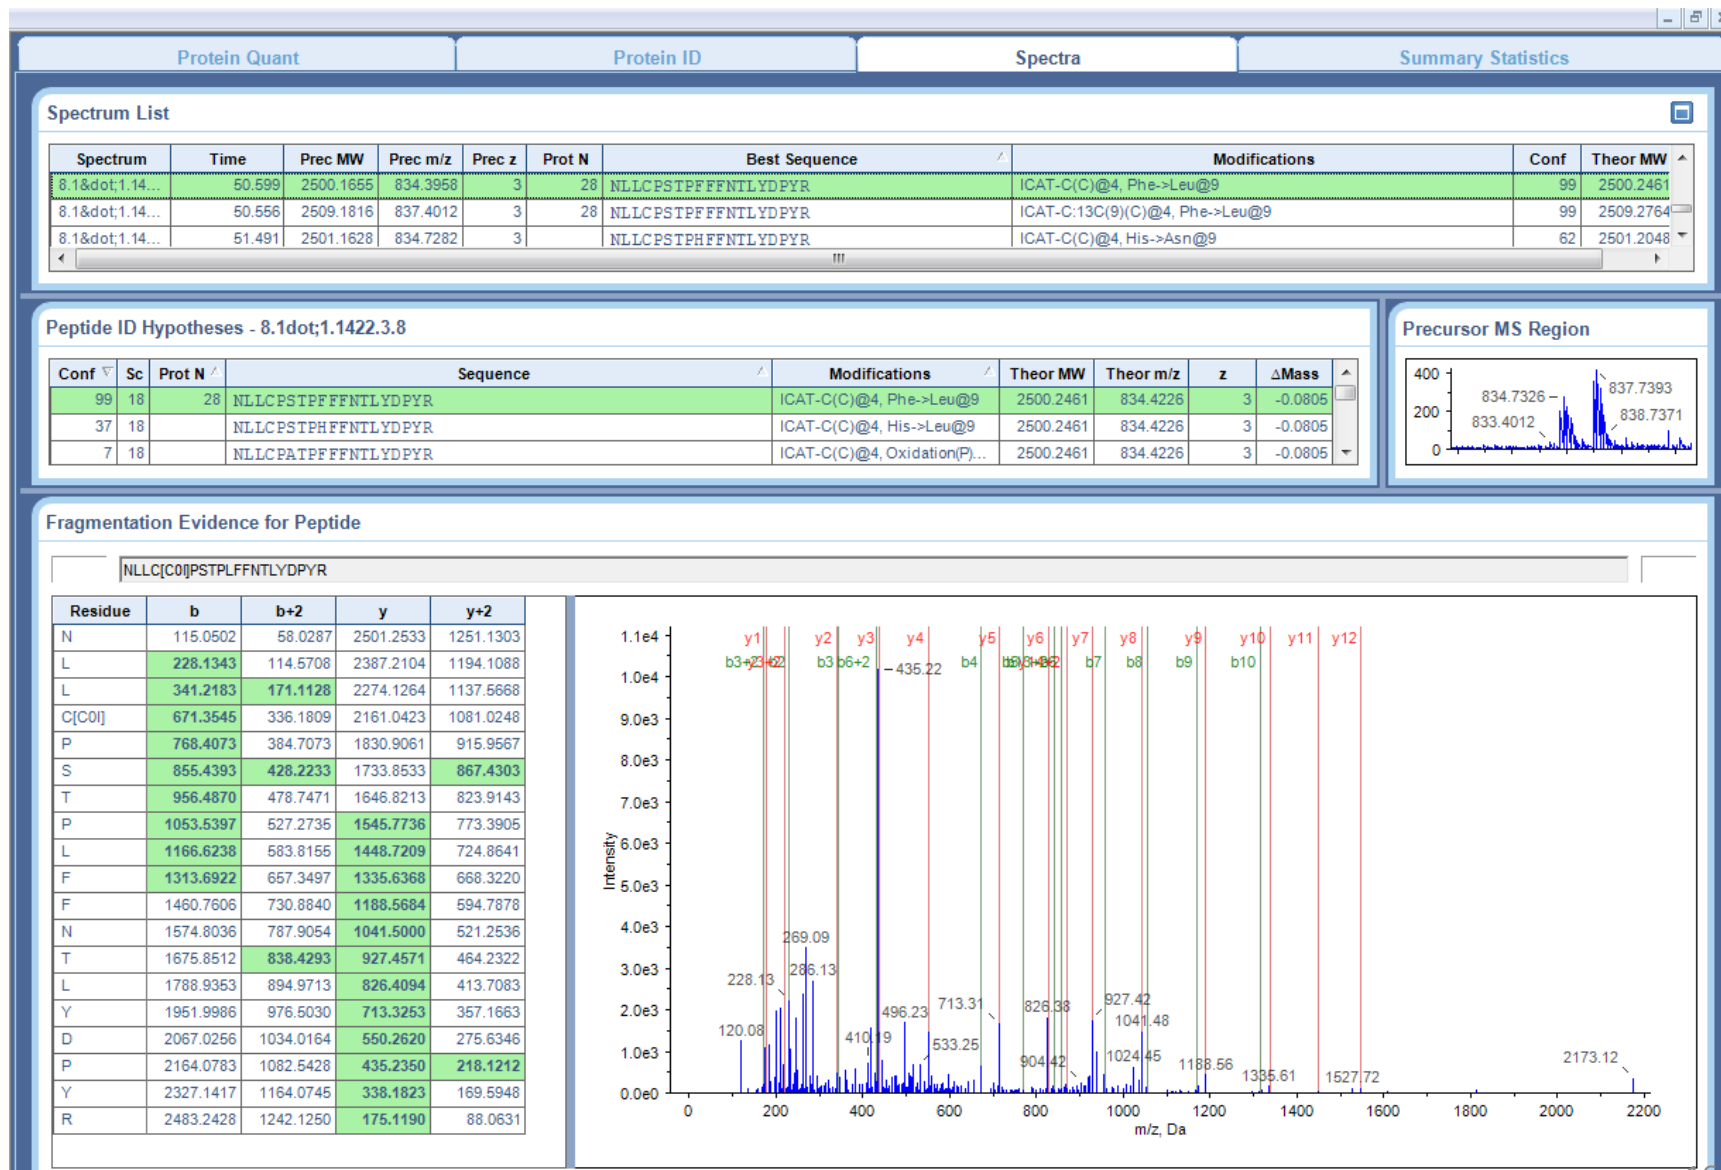

# Threonine synthase HCGISHTGSFK

| Protein Quant | Protein ID | Spectra | Summary Statistics |
|---------------|------------|---------|--------------------|
|---------------|------------|---------|--------------------|

  

### Spectrum List

| Spectrum        | Time   | Prec MW   | Prec m/z | Prec z | Prot N | Best Sequence                | Modifications      | Conf | Theor MW  |
|-----------------|--------|-----------|----------|--------|--------|------------------------------|--------------------|------|-----------|
| 7.1&dot;1.17... | 63.912 | 1421.7114 | 711.8630 | 2      |        | HATTLKAPASRGGR               |                    | < 1  | 1421.7852 |
| 9.1&dot;1.13... | 24.586 | 1399.6583 | 700.8364 | 2      | 77     | HCGISHTGSFK                  | ICAT-C(C)@2        | 54   | 1399.6666 |
| 9.1&dot;1.13... | 24.395 | 1408.6772 | 705.3459 | 2      | 77     | HCGISHTGSFK                  | ICAT-C:13C(9)(C)@2 | 99   | 1408.6969 |
| 9.1&dot;1.13... | 25.625 | 1221.6115 | 611.8130 | 2      | 133    | HCVNSVSIK                    | ICAT-C:13C(9)(C)@2 | 90   | 1221.6587 |
| 10.1&dot;1.1... | 68.828 | 0.0000    | 695.3573 | 0      |        | HDHGAGRAAAHPGHAQAVQVPEGTHGGR |                    | < 1  | 2777.3354 |
| 2.1&dot;1.15... | 43.530 | 0.0000    | 613.2959 | 0      |        | HDQDSMVSGLQGMADPDP           |                    | < 1  | 1836.8351 |

  

### Peptide ID Hypotheses - 9.1&dot;1.1356.2.9

| Conf | Sc | Prot N | Sequence      | Modifications      | Theor MW  | Theor m/z | z | ΔMass   |
|------|----|--------|---------------|--------------------|-----------|-----------|---|---------|
| 99   | 19 | 77     | HCGISHTGSFK   | ICAT-C:13C(9)(C)@2 | 1408.6969 | 705.3557  | 2 | -0.0196 |
| < 1  | 13 |        | IRSSENGPMGSFK |                    | 1408.6769 | 705.3457  | 2 | 0.0003  |
| < 1  | 12 |        | HCLGRLISFK    | ICAT-C:13C(9)(C)@2 | 1408.8060 | 705.4103  | 2 | -0.1288 |
| < 1  | 12 |        | VWAVFMLVWAMK  | Oxidation(M)@11    | 1408.7611 | 705.3878  | 2 | -0.0839 |
| < 1  | 11 |        | HPVDLLQLLSFK  |                    | 1408.8079 | 705.4112  | 2 | -0.1306 |

  

### Precursor MS Region

Mass spectrum showing relative intensity versus m/z (Da) for the precursor ion. The x-axis ranges from 700 to 715 Da. The y-axis represents relative intensity from 0 to 150. Major peaks are labeled at m/z 700.8317, 705.3439, and 709.8625.

  

### Fragmentation Evidence for Peptide

HC[C9]GISHTGSFK

| Residue | b         | b+2      | y         | y+2      |
|---------|-----------|----------|-----------|----------|
| H       | 138.0662  | 69.5367  | 1409.7041 | 705.3557 |
| C[C9]   | 477.2326  | 239.1199 | 1272.6452 | 636.8263 |
| G       | 534.2540  | 267.6306 | 933.4789  | 467.2431 |
| I       | 647.3381  | 324.1727 | 876.4574  | 438.7323 |
| S       | 734.3701  | 367.6887 | 763.3733  | 382.1903 |
| H       | 871.4290  | 436.2182 | 676.3413  | 338.6743 |
| T       | 972.4767  | 486.7420 | 539.2824  | 270.1448 |
| G       | 1029.4982 | 515.2527 | 438.2347  | 219.6210 |
| S       | 1116.5302 | 558.7687 | 381.2132  | 191.1103 |
| F       | 1263.5986 | 632.3029 | 294.1812  | 147.5942 |
| K       | 1391.6936 | 696.3504 | 147.1128  | 74.0600  |

  

Mass spectrum showing relative intensity versus m/z (Da) for the peptide. The x-axis ranges from 0 to 1400 Da. The y-axis represents relative intensity from 0 to 350. The spectrum shows a series of b and y ions characteristic of a tryptic digest. Key peaks are labeled with their m/z values: 110.07, 129.10, 120.08, 207.09, 245.10, 278.13, 254.12, 294.18, 381.22, 432.20, 460.19, 477.22, 539.27, 599.26, 647.36, 734.35, 763.37, 843.43, 871.43, 933.46, 1011.46, 1098.51, 1116.52, 1081.48, 1245.62, 1391.69, 1374.69, 1409.70, and 1499.70.

# Oxalic acid oxidase SVQDFCVANLKR

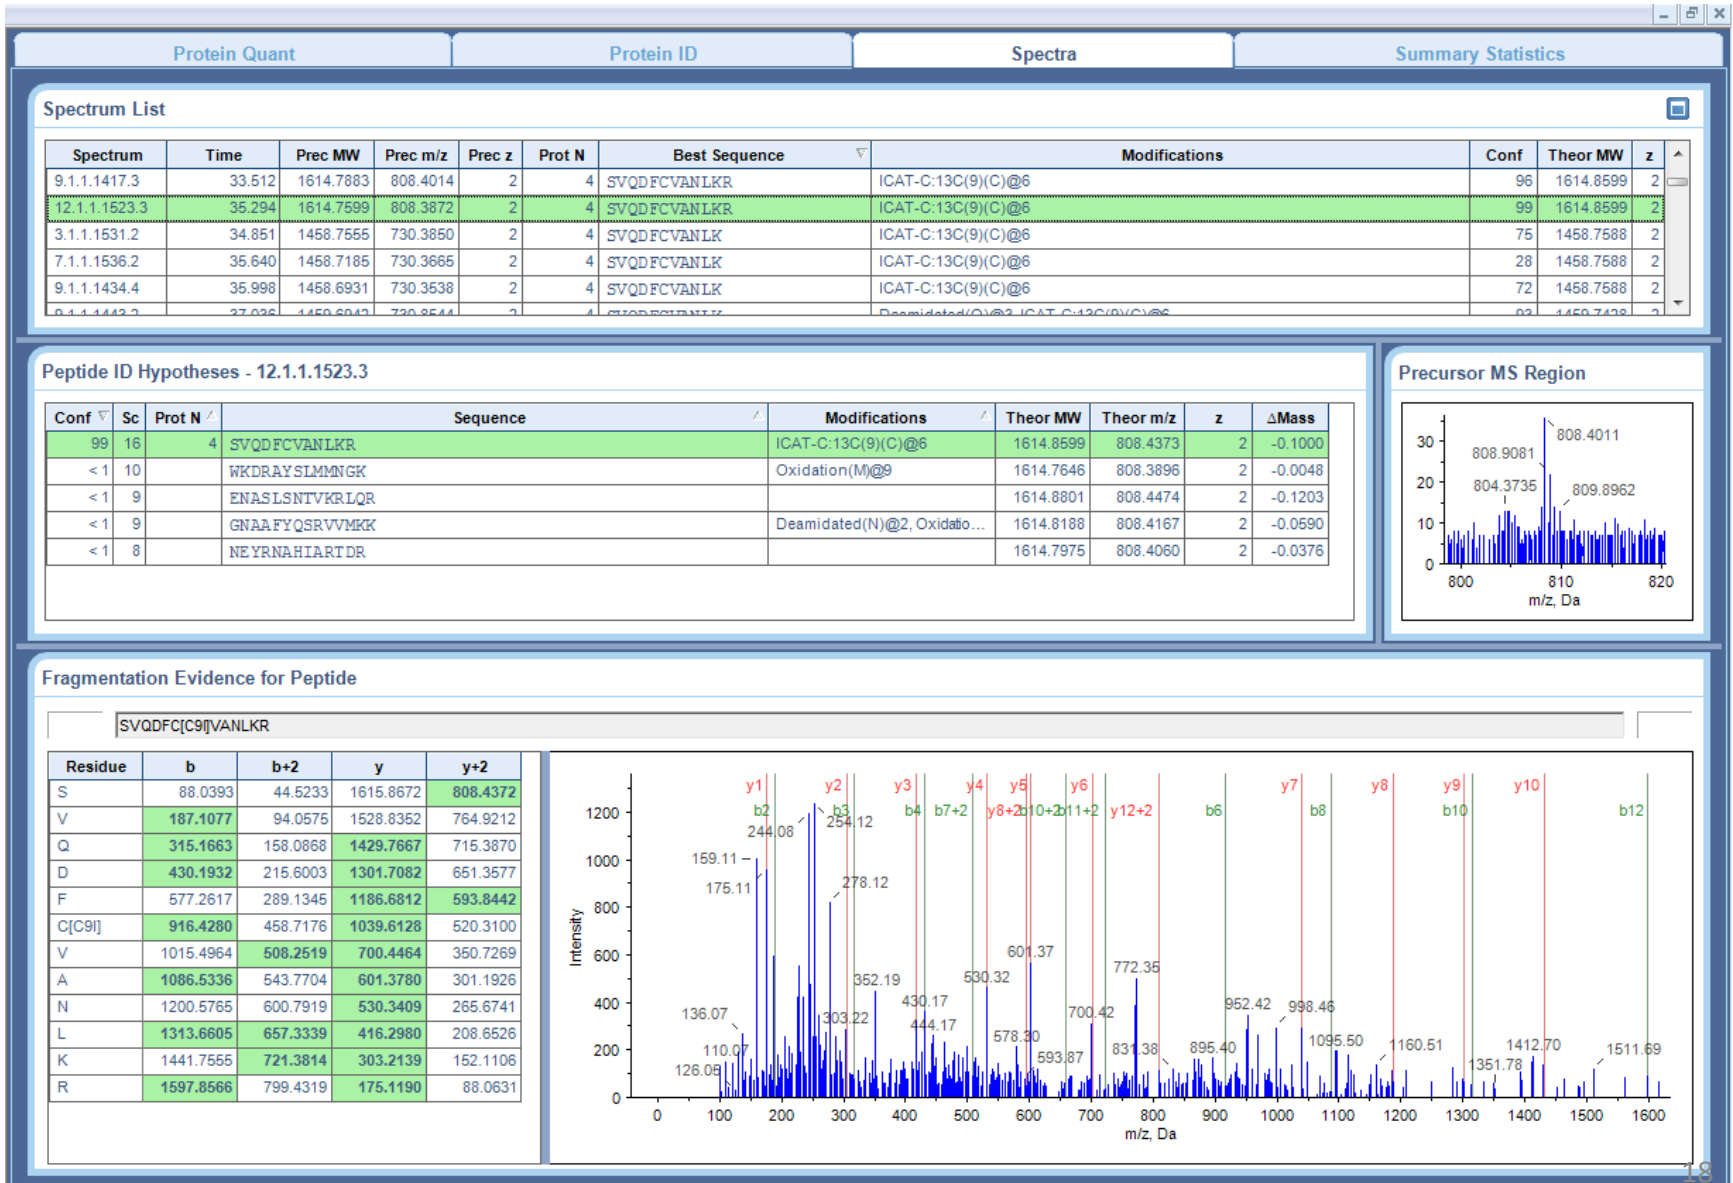

# Oxalic acid oxidase AETPAGYPCIRPIHK

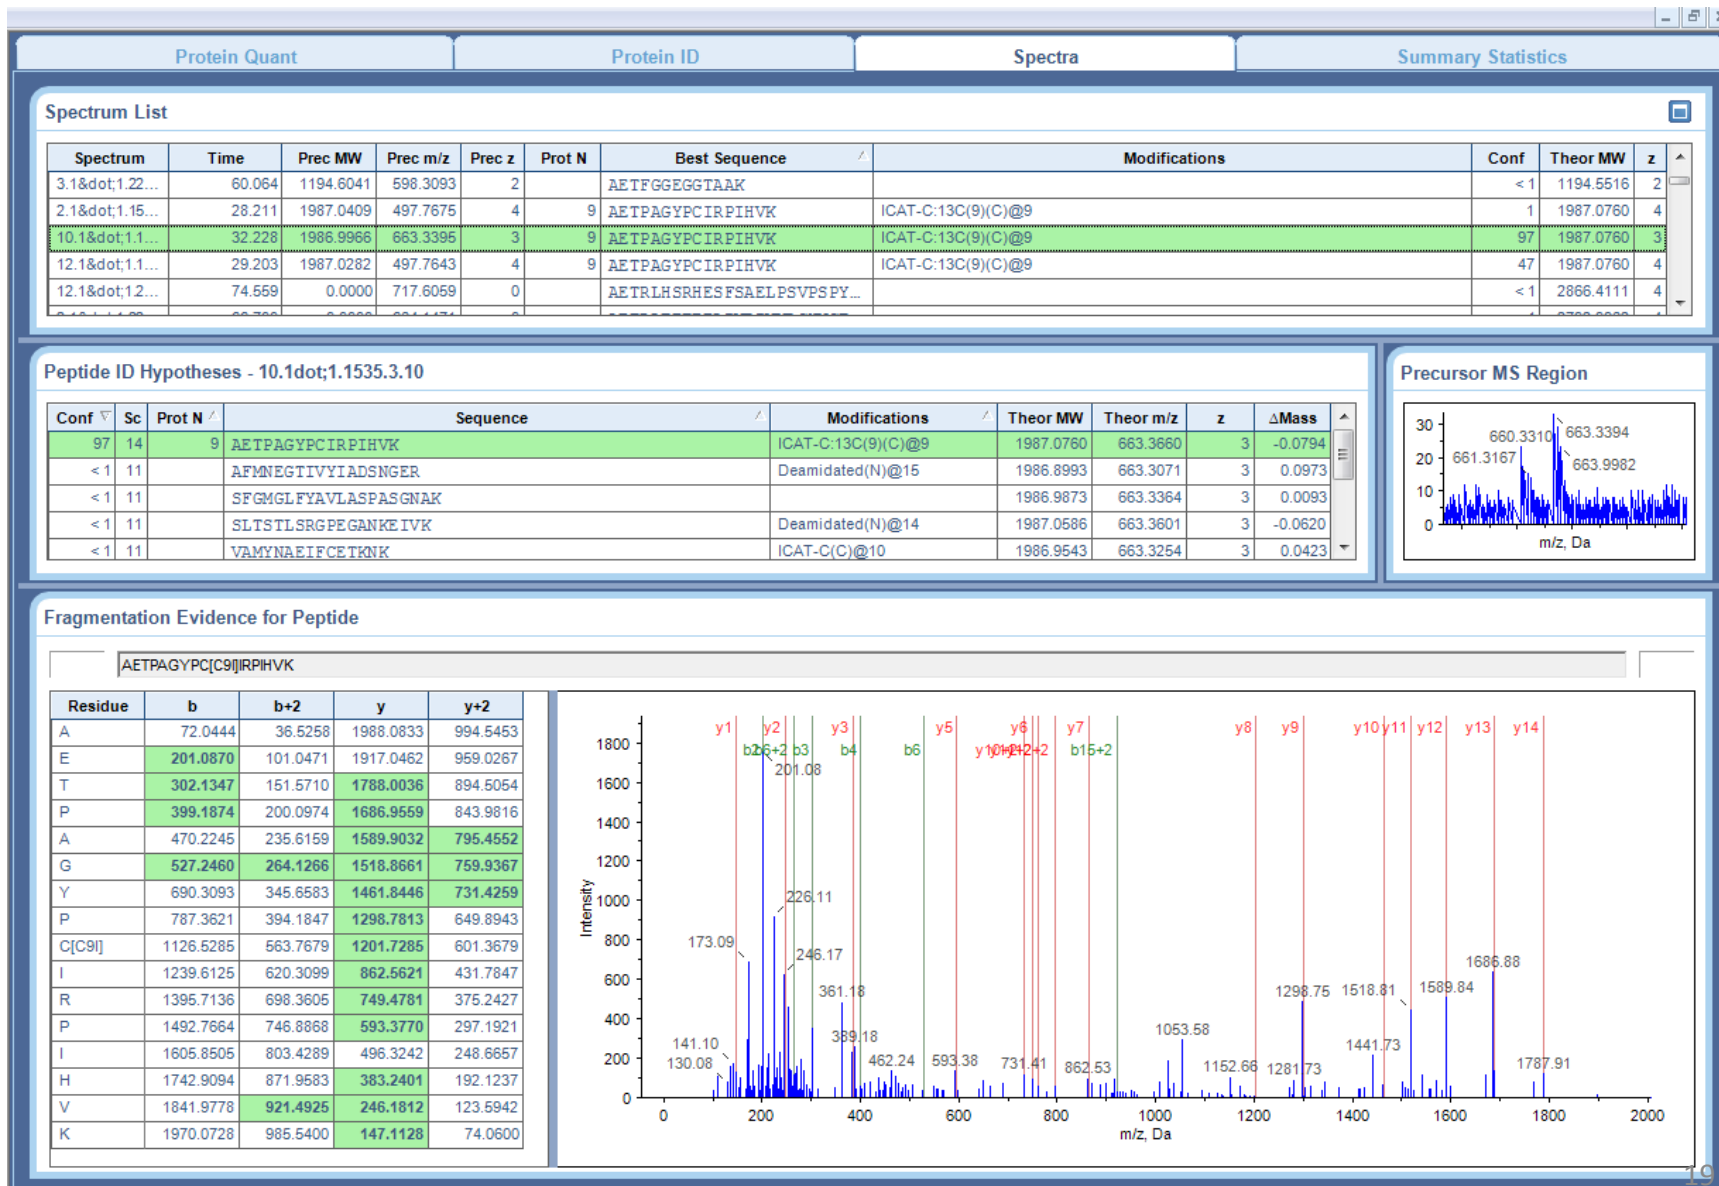

# Initiation factor 5A-4, putative KLEDIVPSSHNCDVPHVNR

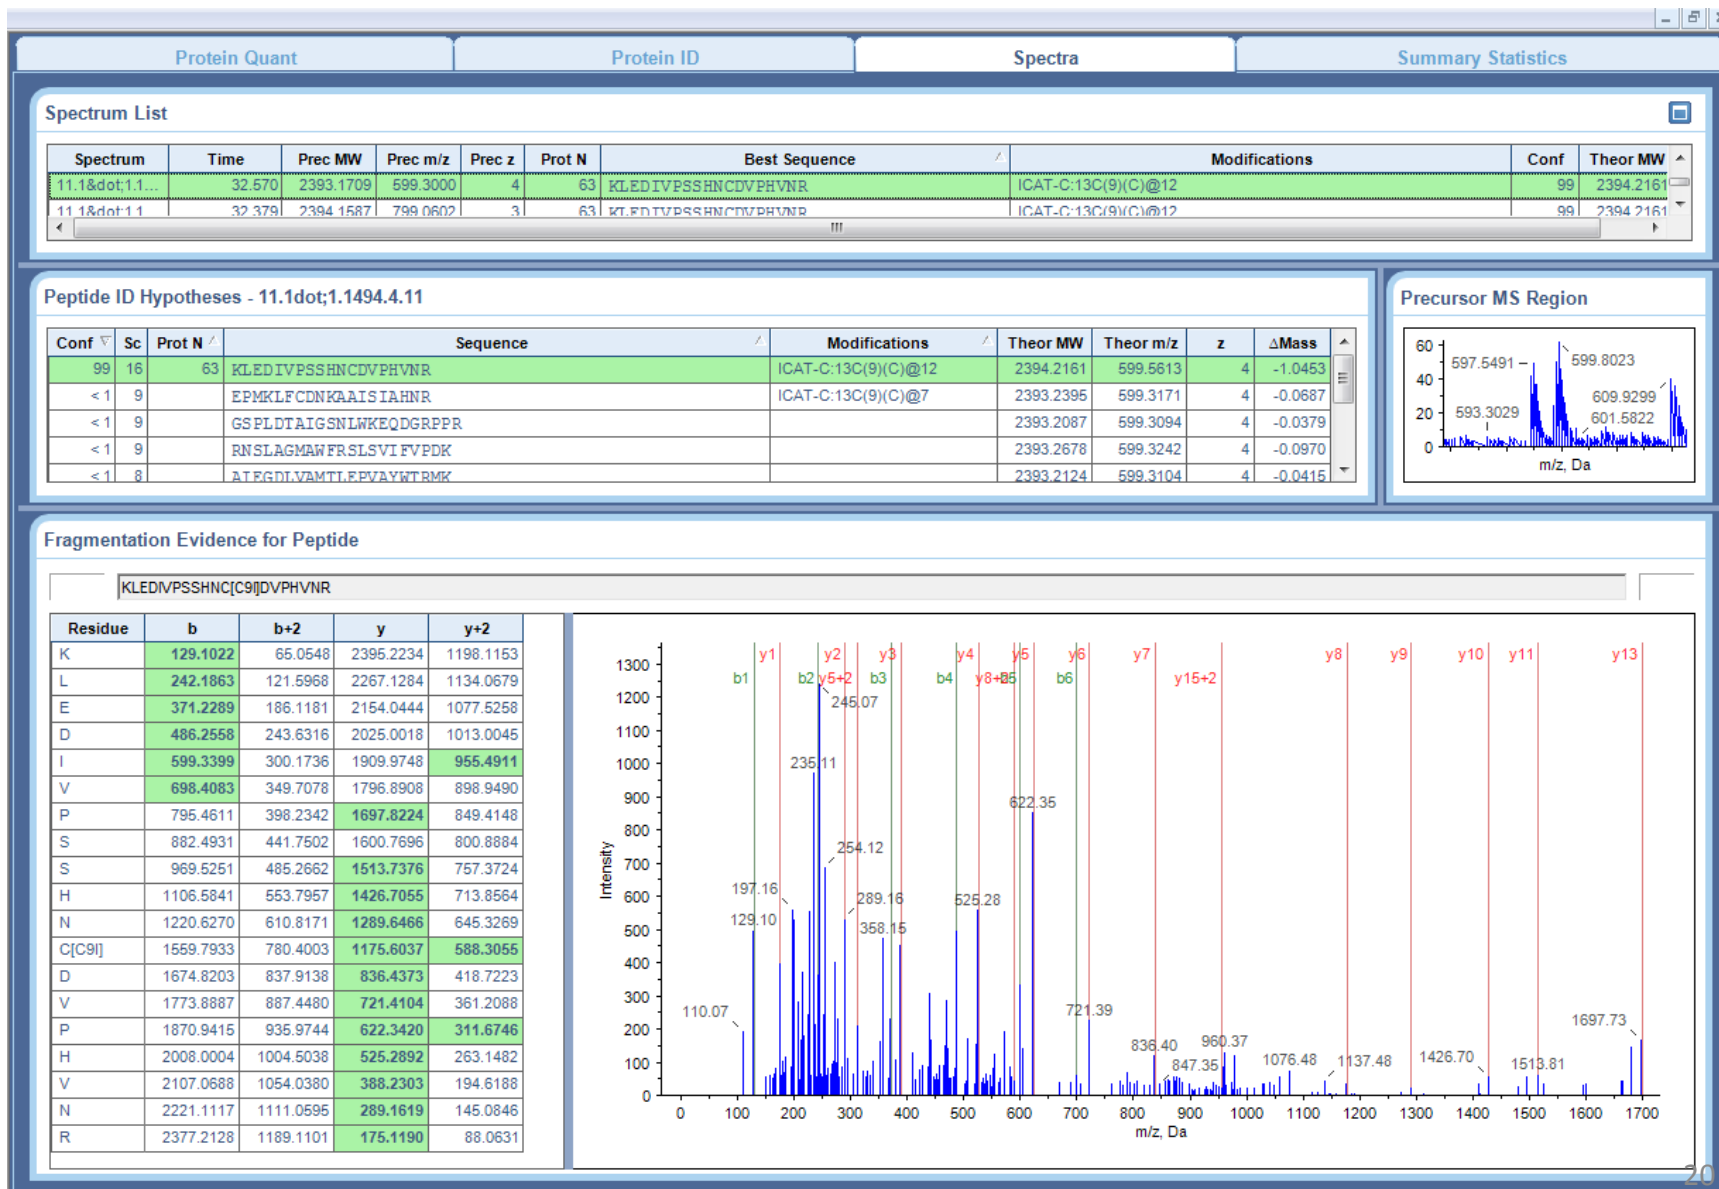

# Mitochondrial elongation factor Tu

## QVGVPSLVCFLNK

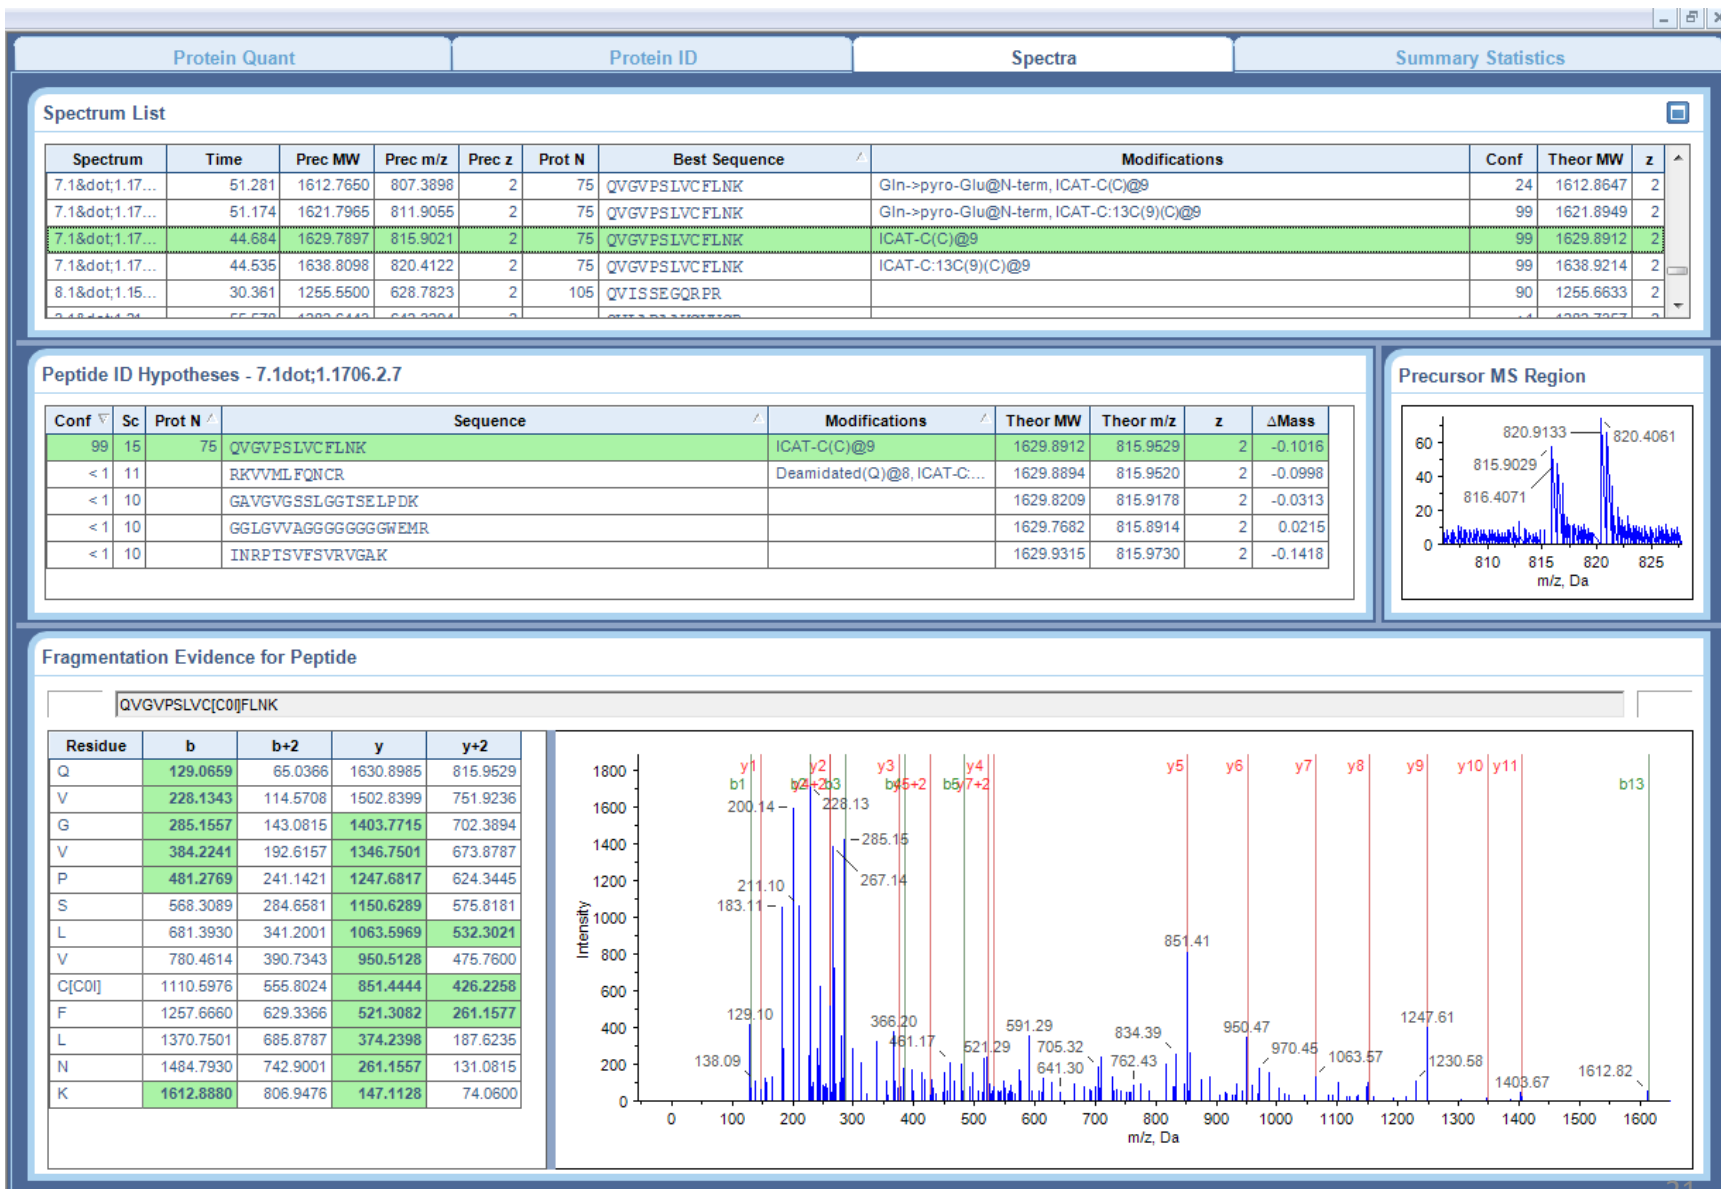

# 60S ribosomal protein L2 SIPEGAVVCNVEHHVGDR

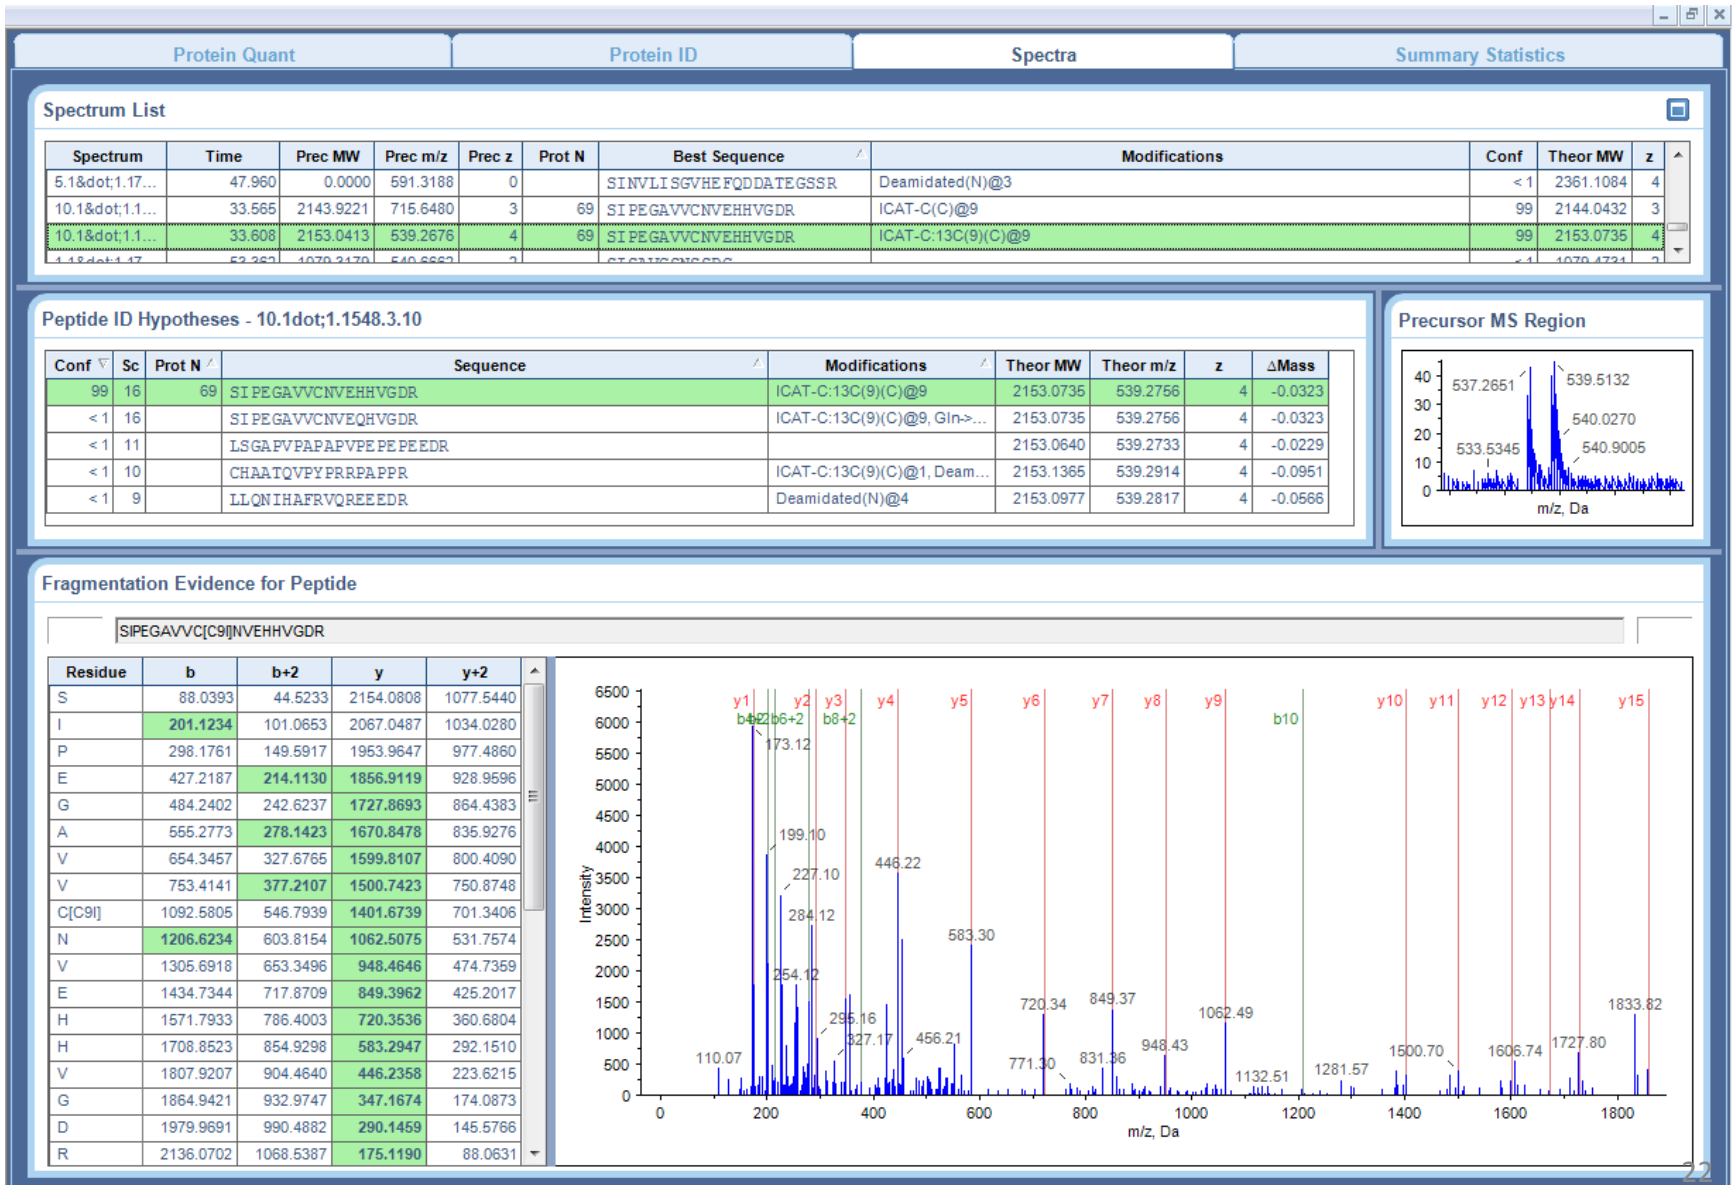

# Ubiquitin extension protein (UBQ5) CGLTYVYQK

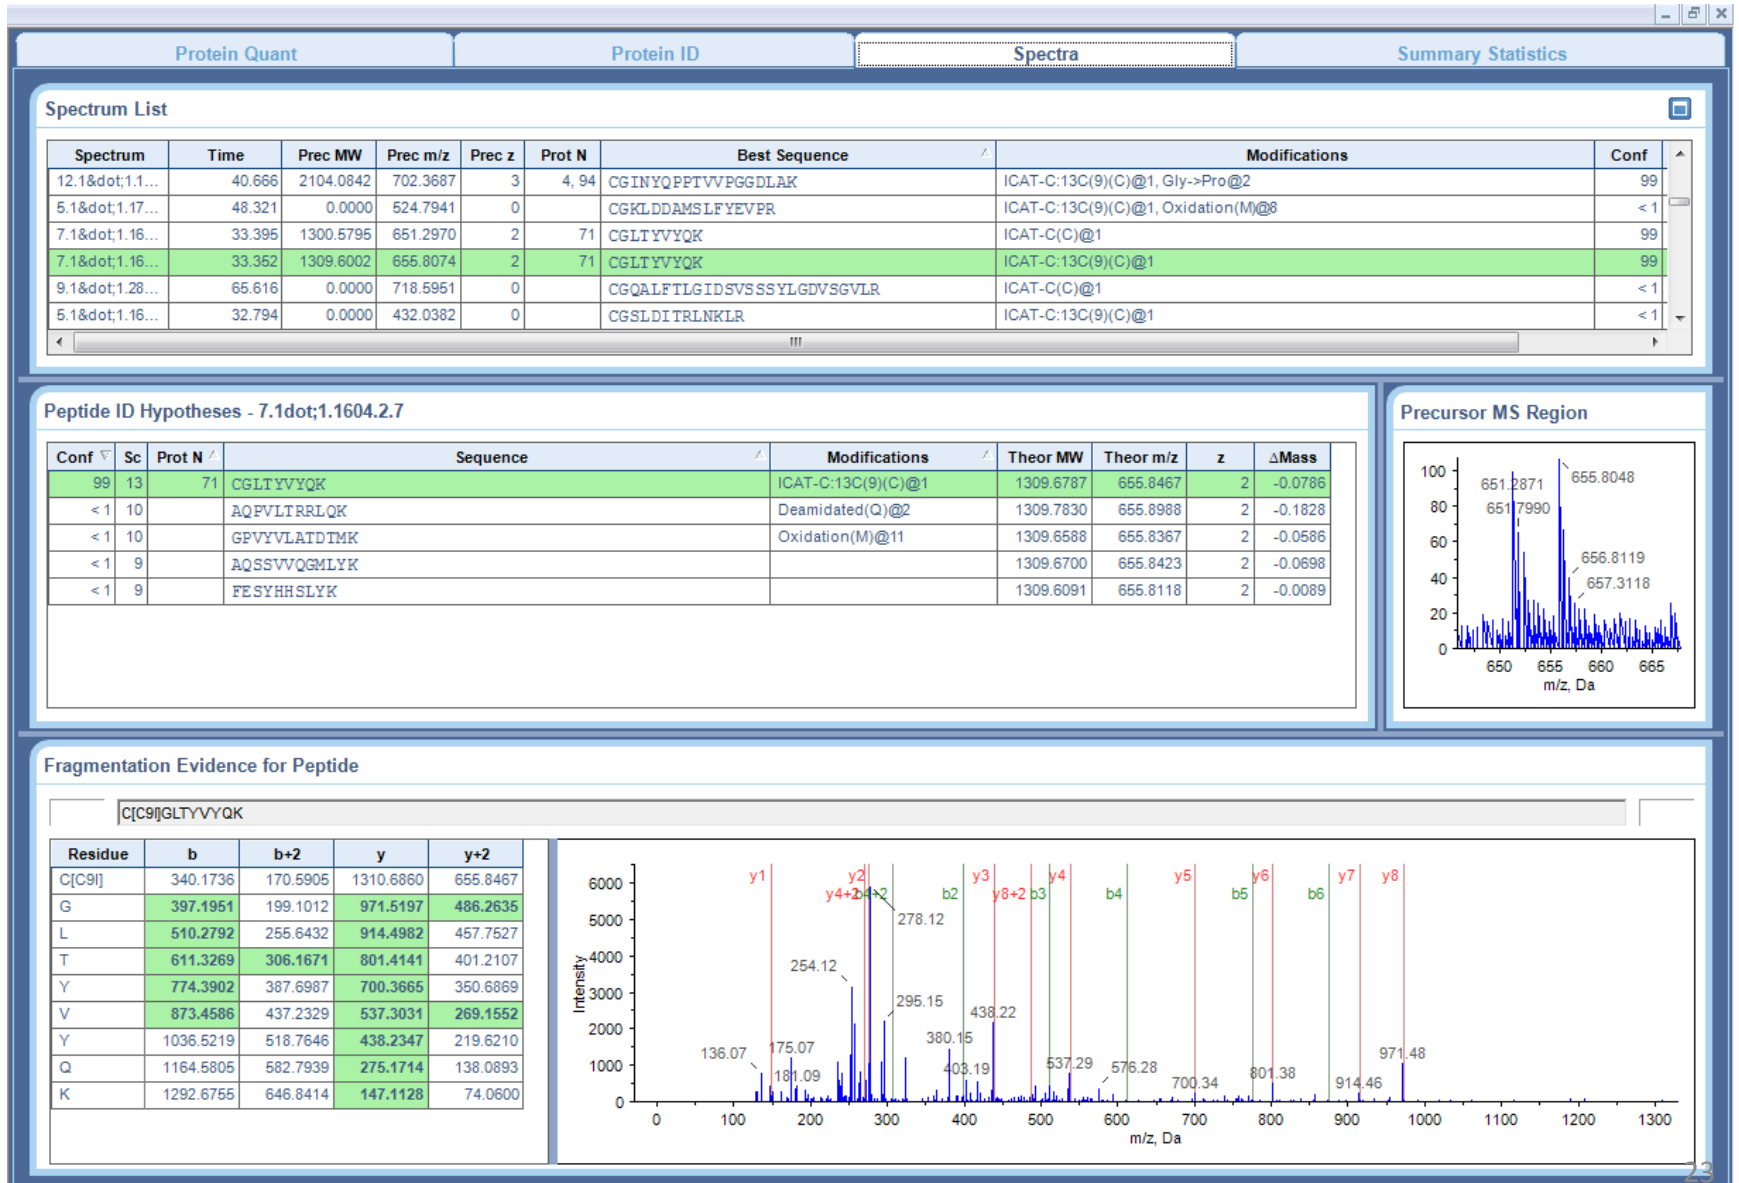



# Early response to dehydration protein (ERD12)

## NPQQLCIGDLVPFTNK

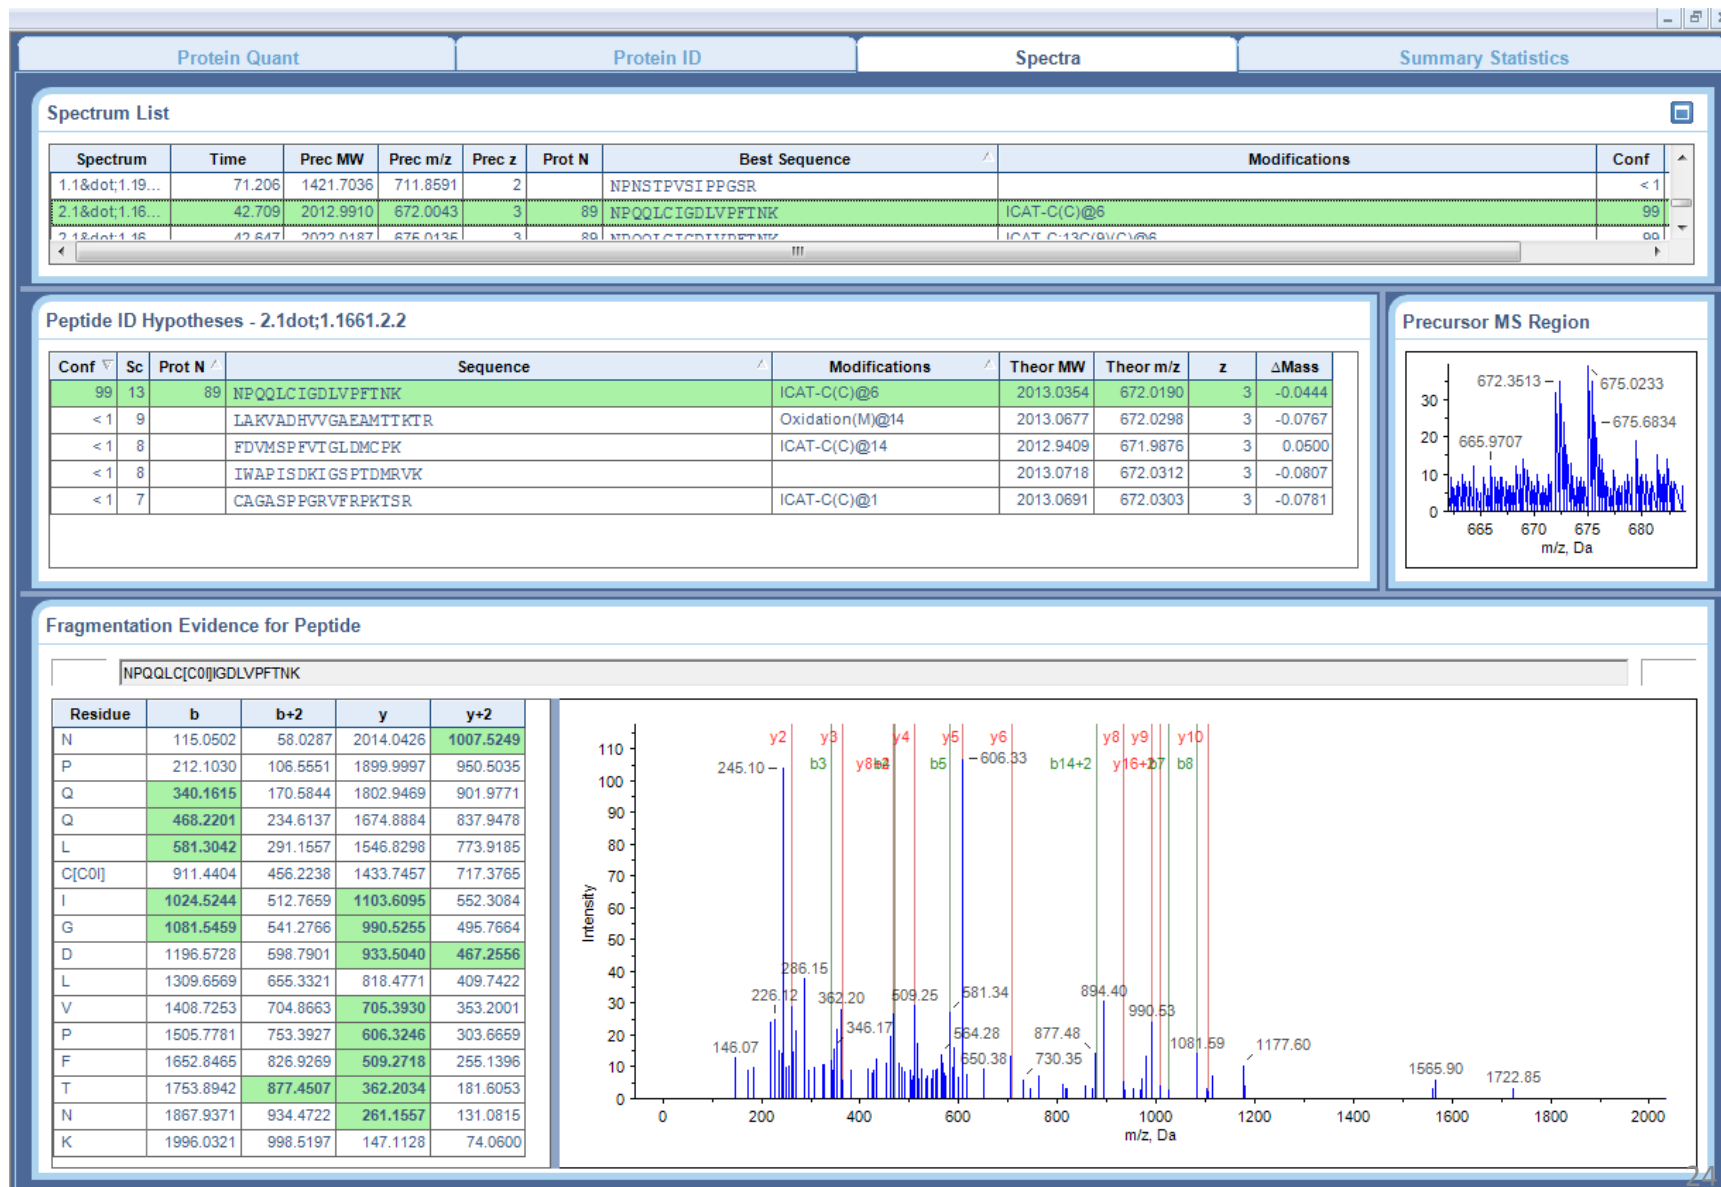

# Stromal ascorbate peroxidase

## VDTSGPHECPEEGRLPDAGPPSPANHLR

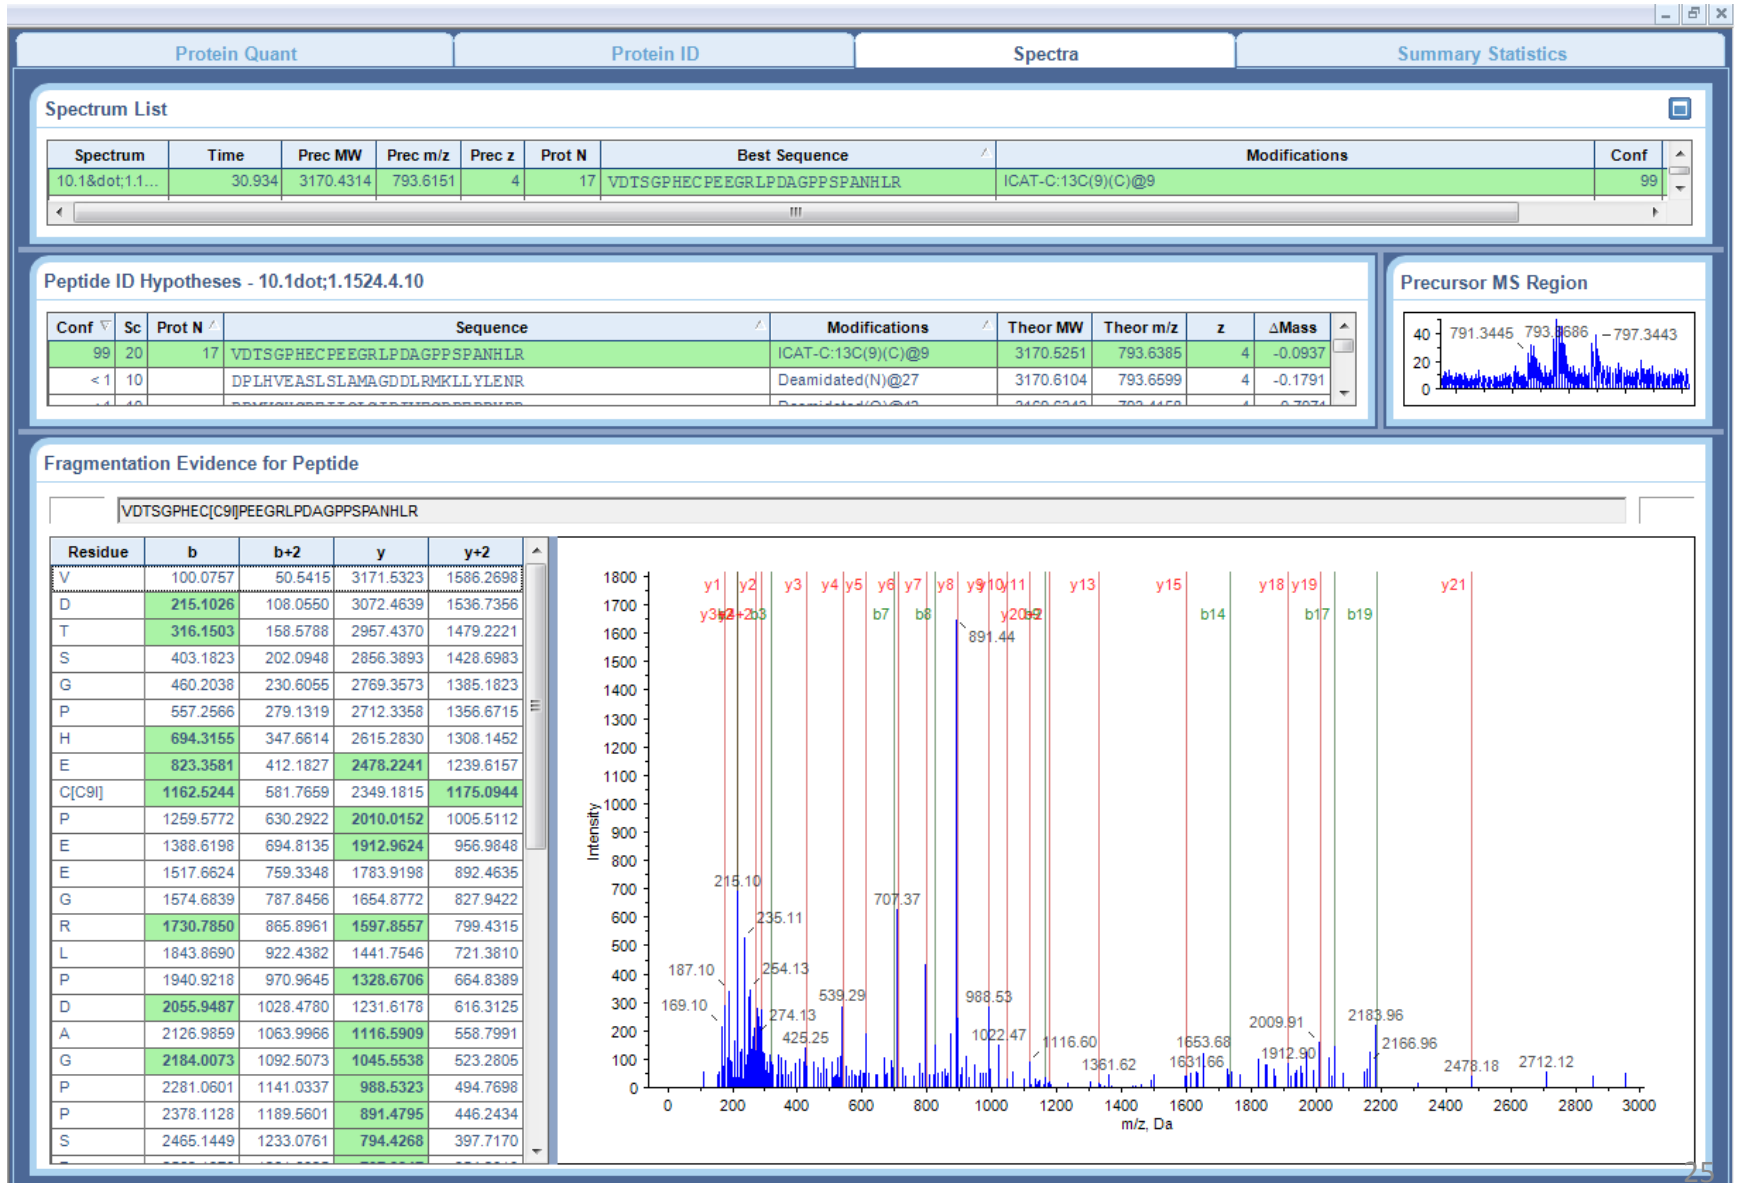

# Extensin-like protein IPASICQLPK

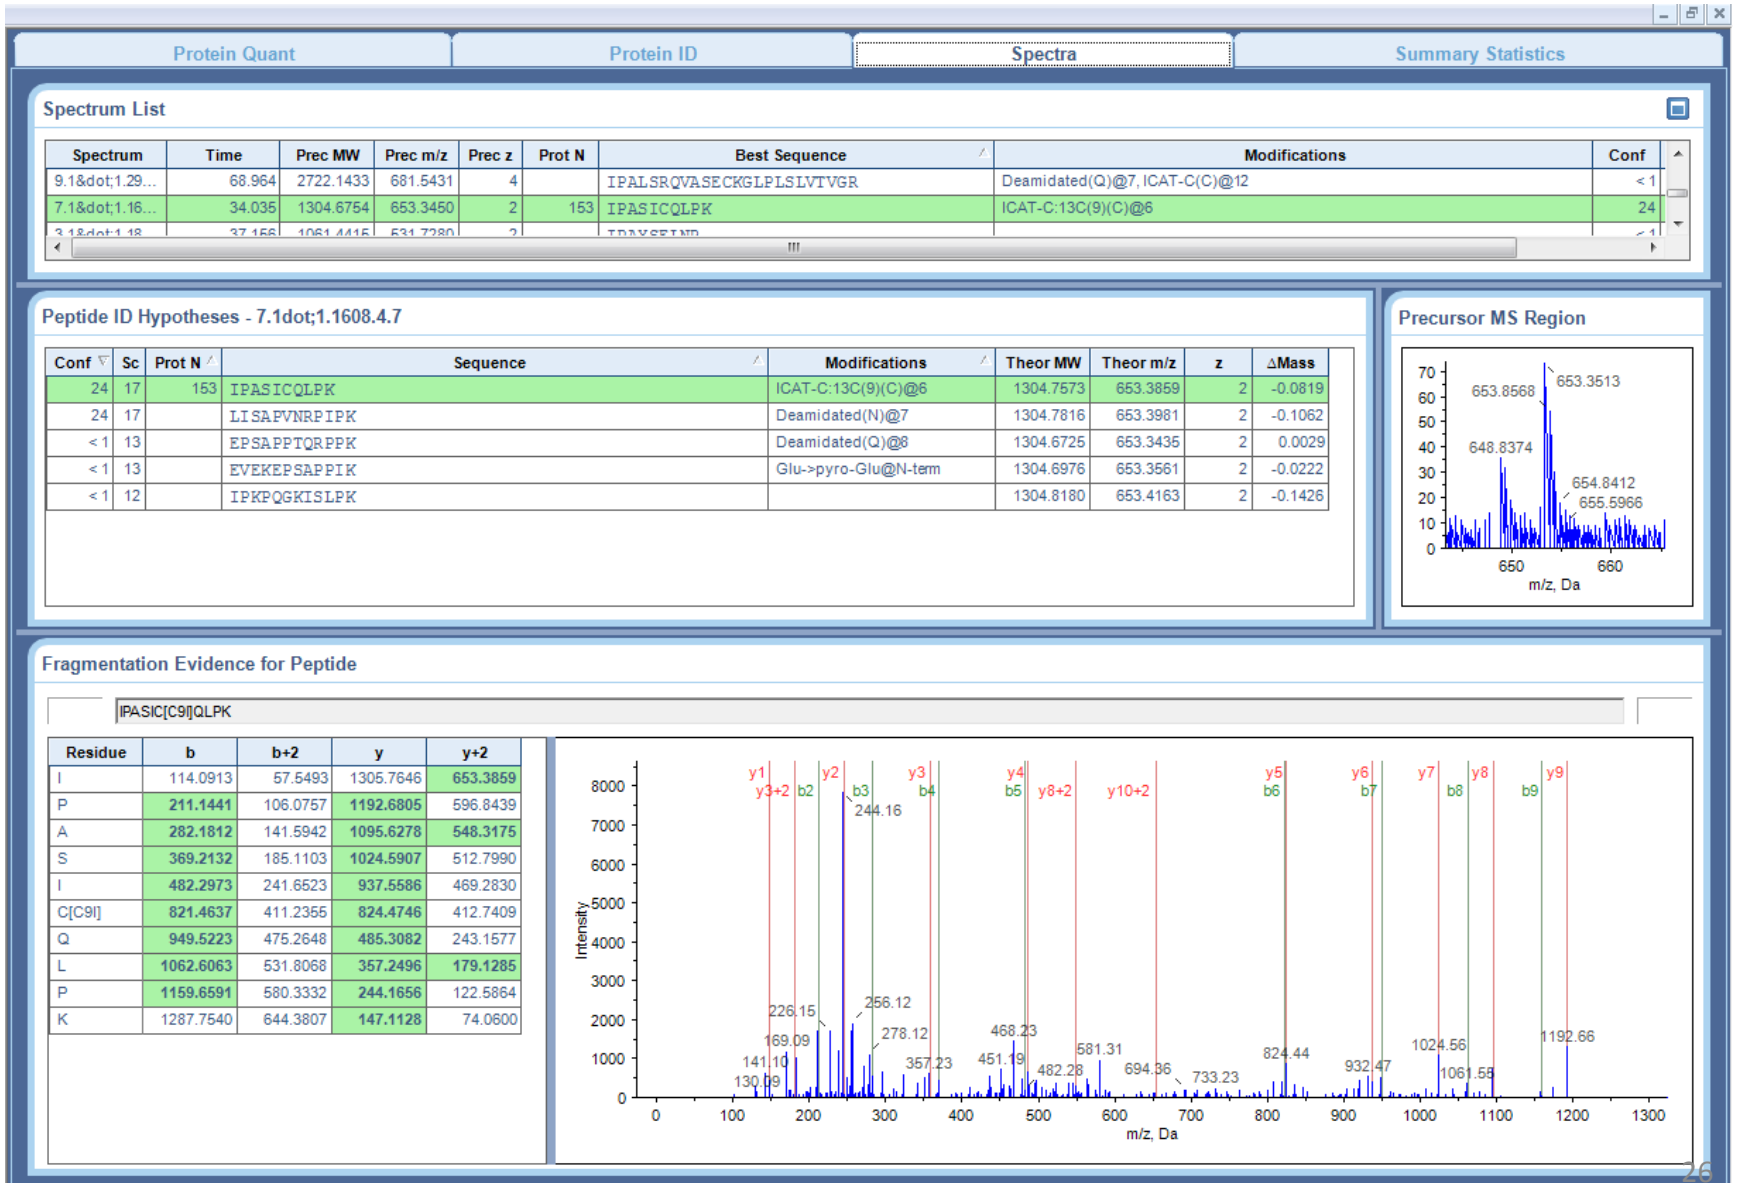

# Cell division protein FtsH GCLLVGPPGTGK

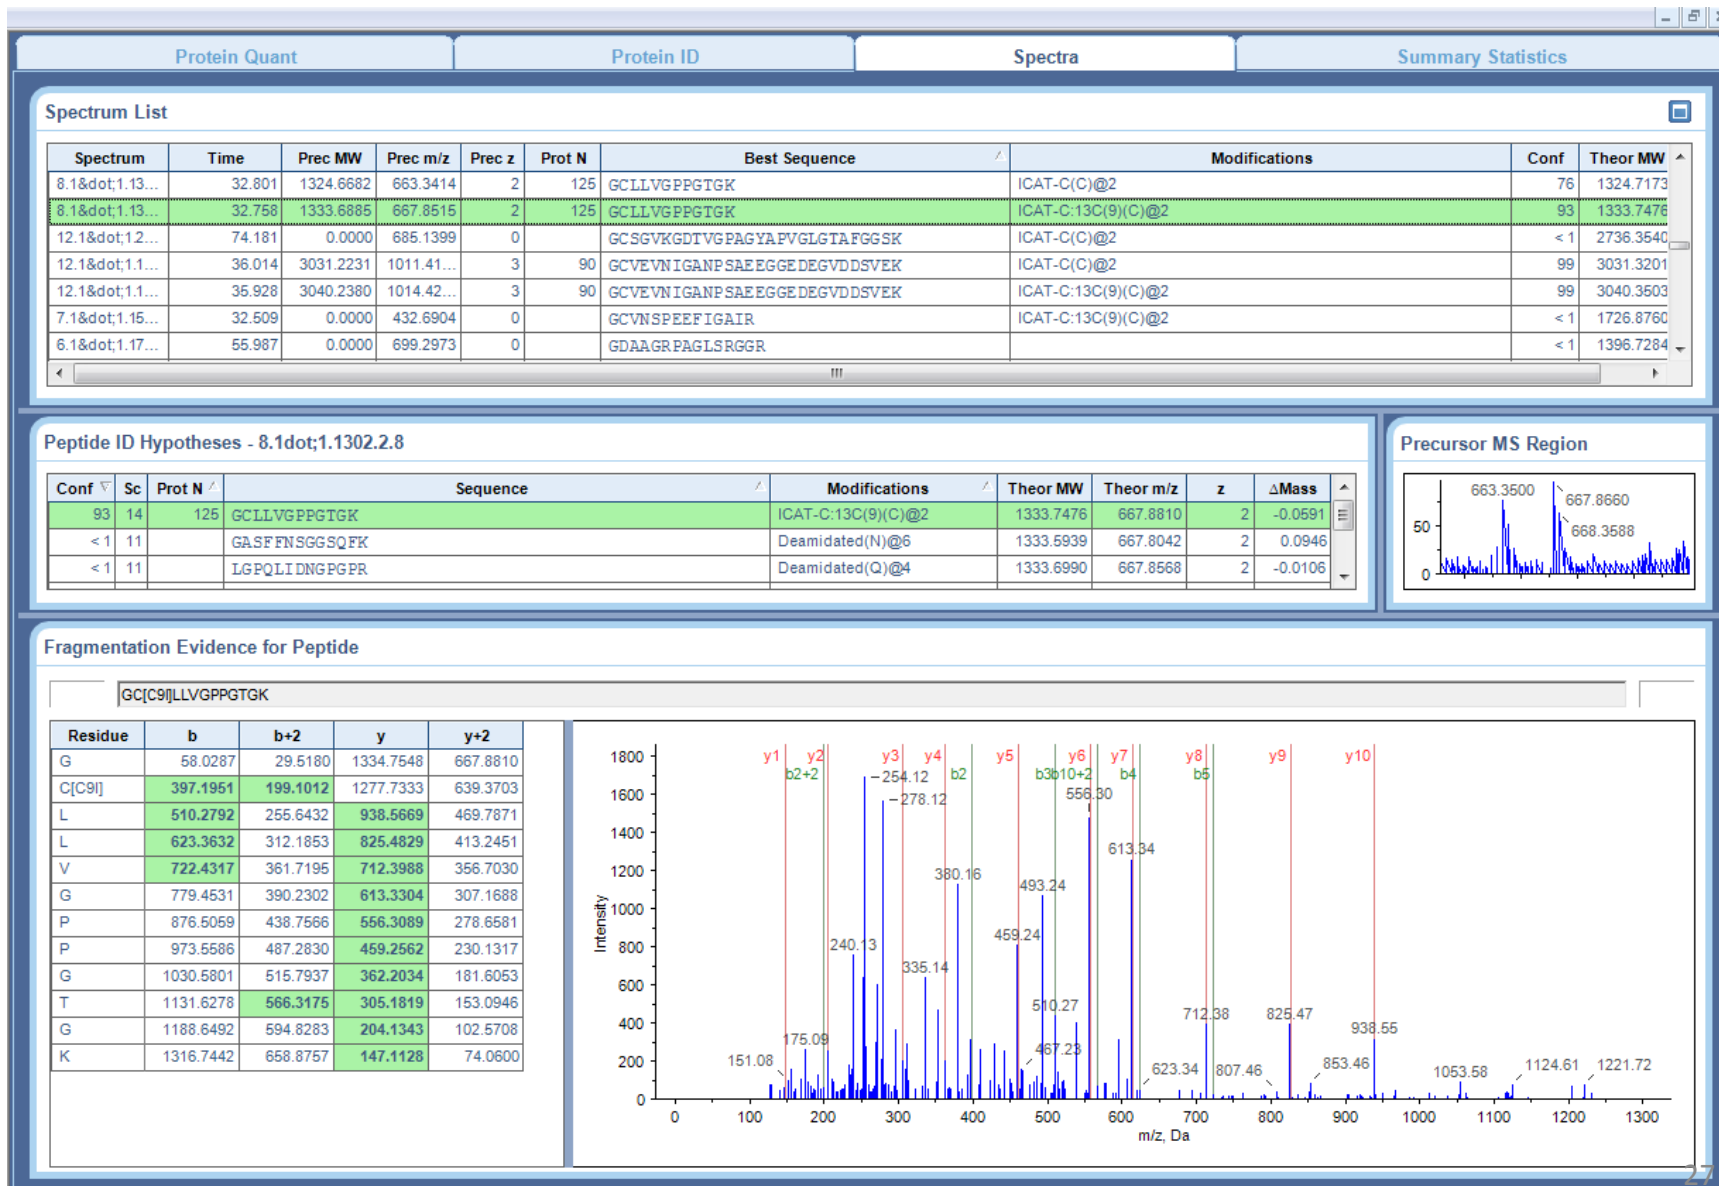

# Unnamed protein product

## LLICGGSAYPR

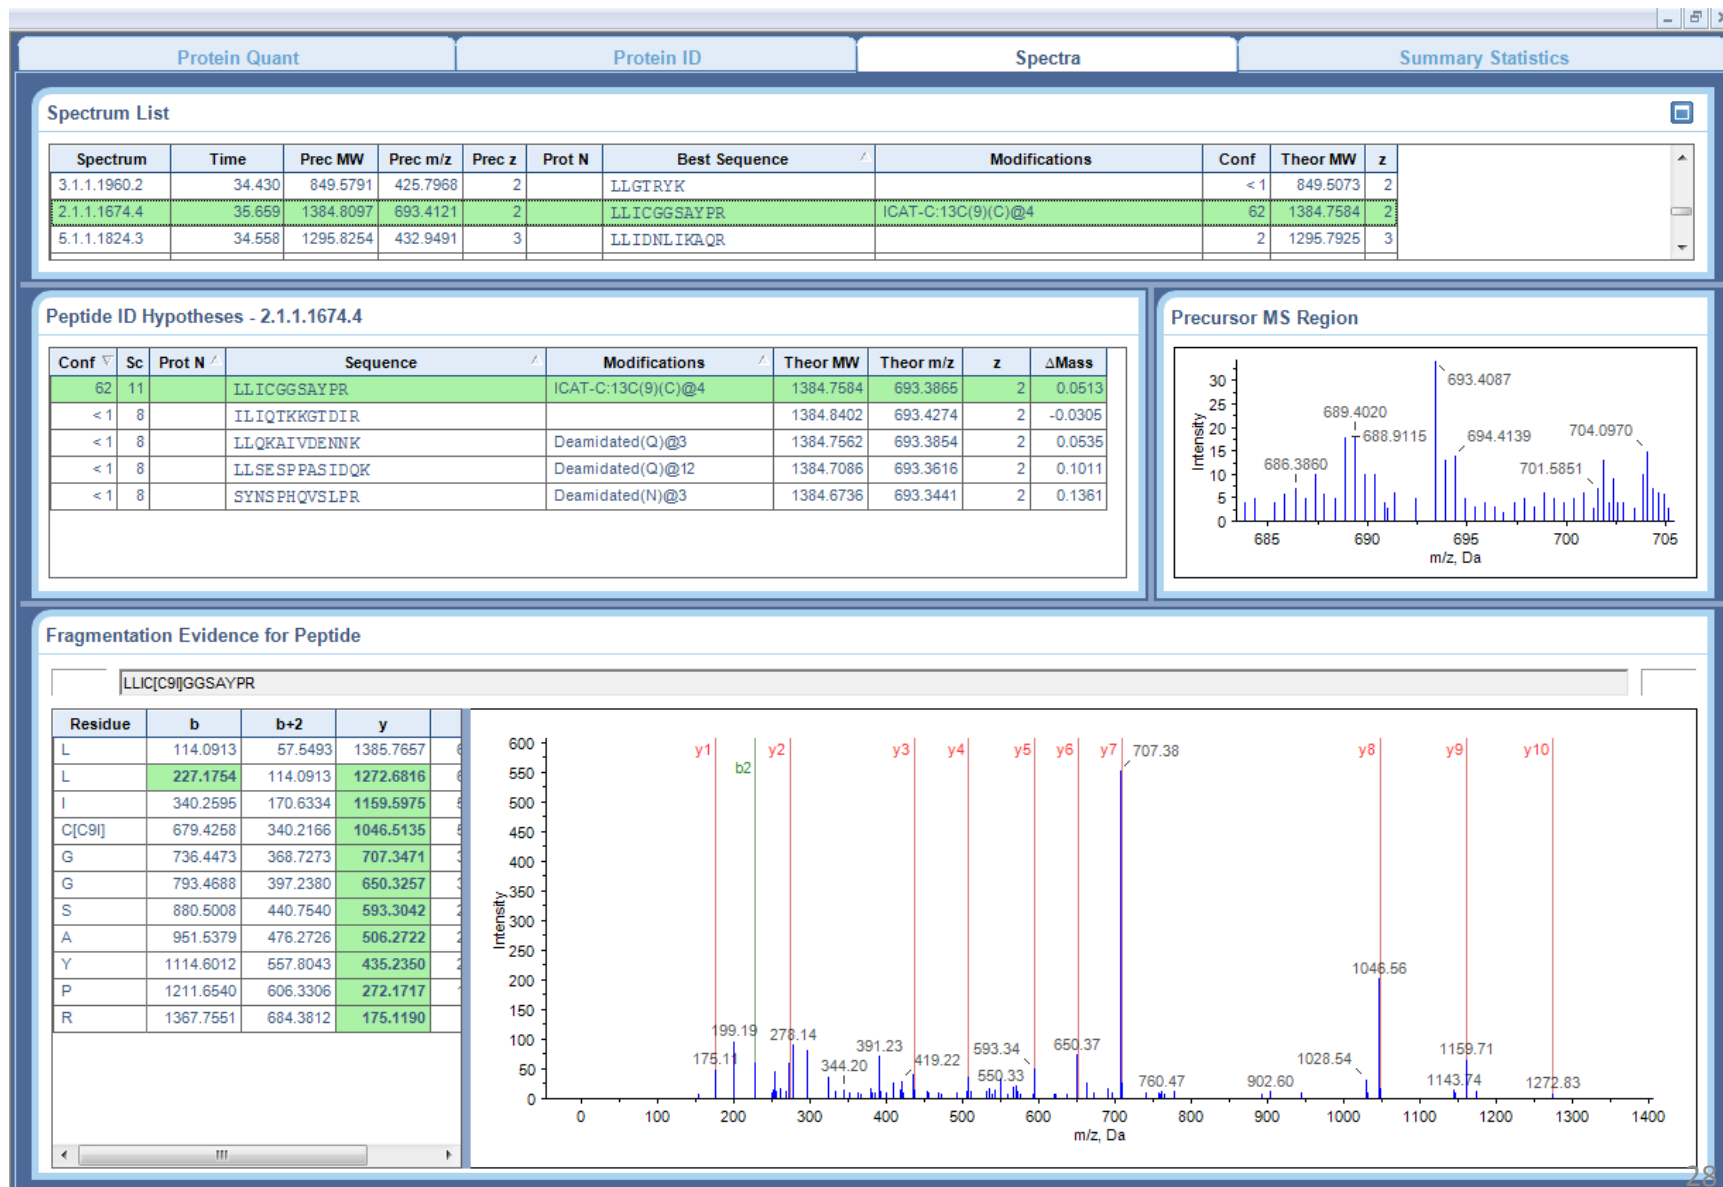

## Figure S3

### **MS/MS spectra of ICAT identified MeJA responsive cysteines**

Twenty one cysteines were mapped from MeJA treated guard cells. The precursor of the cysteine-containing peptide and the fragmented ions were shown as the evidence for mapping.

# Ribulose biphosphate carboxylase large chain precursor GHYLNATAGTCEEMMKR

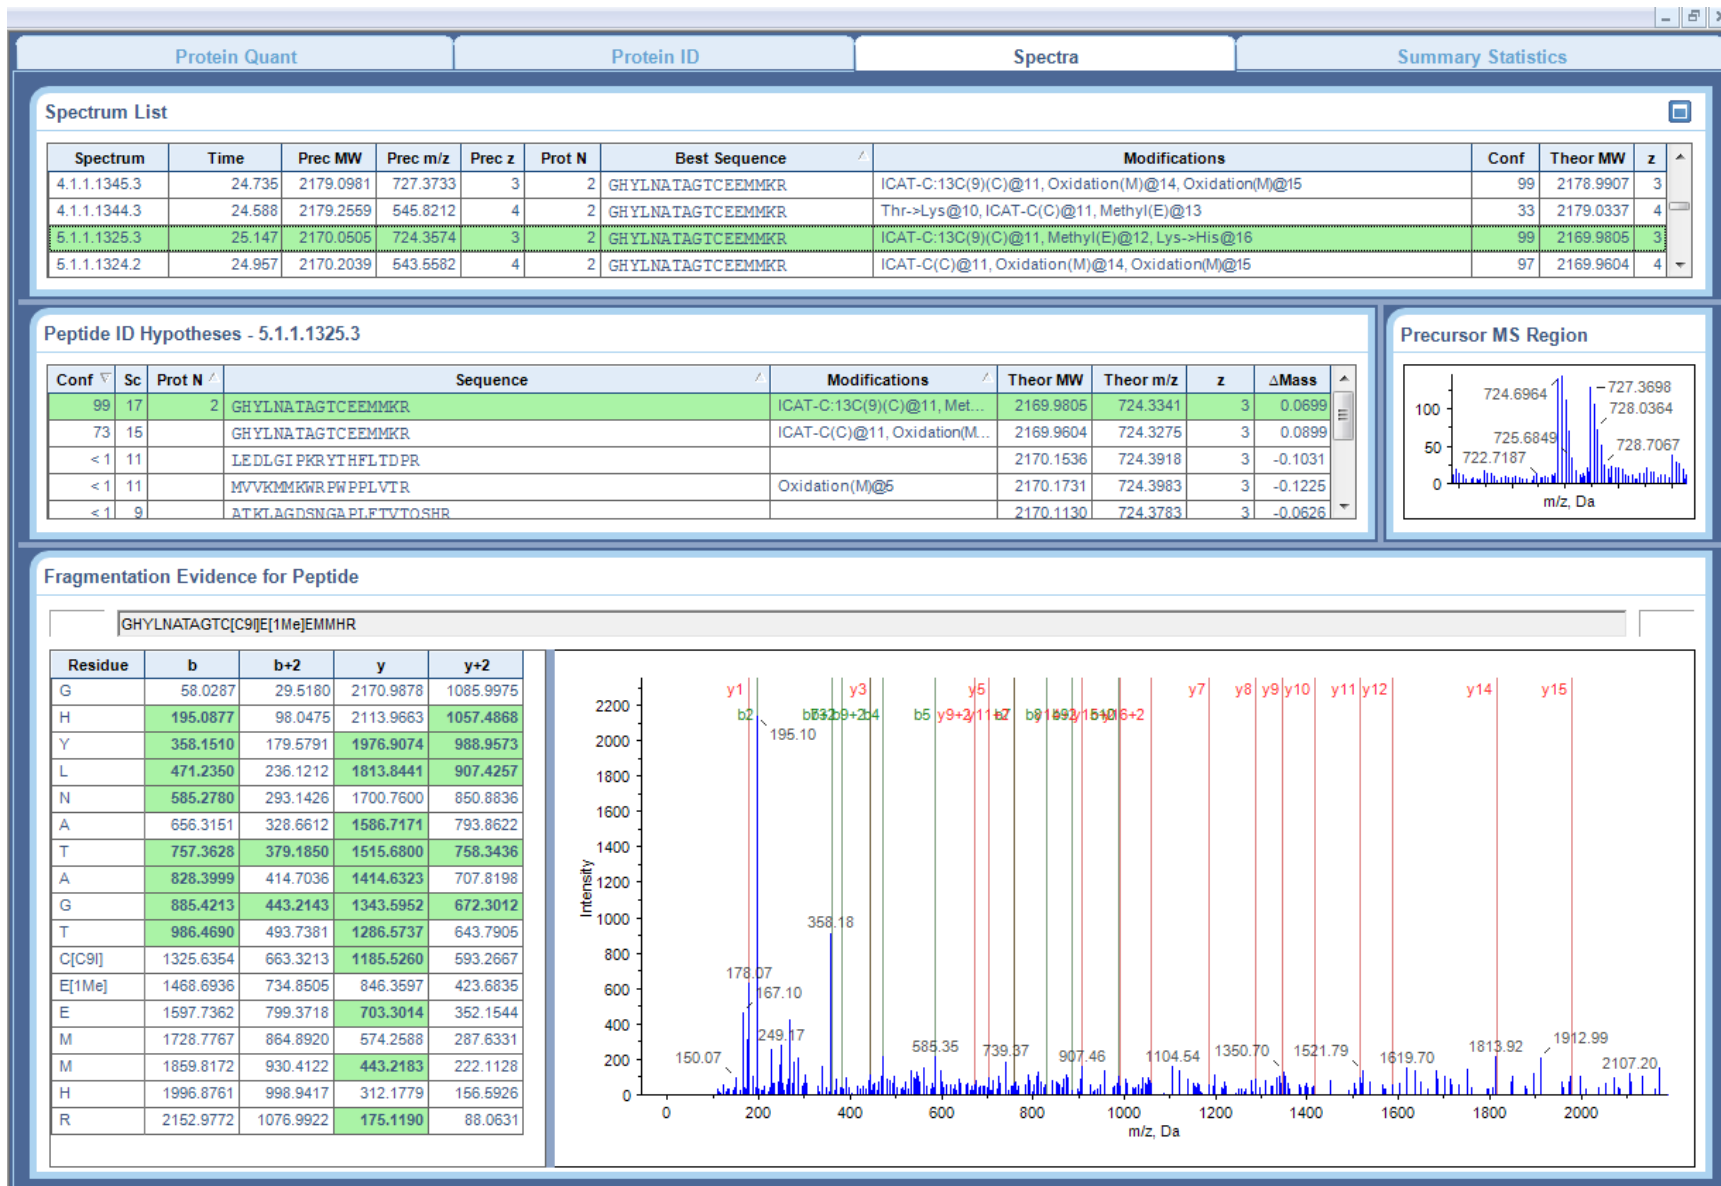

# Ribulose biphosphate carboxylase small chain

## LPLFGCTDSAQVLK

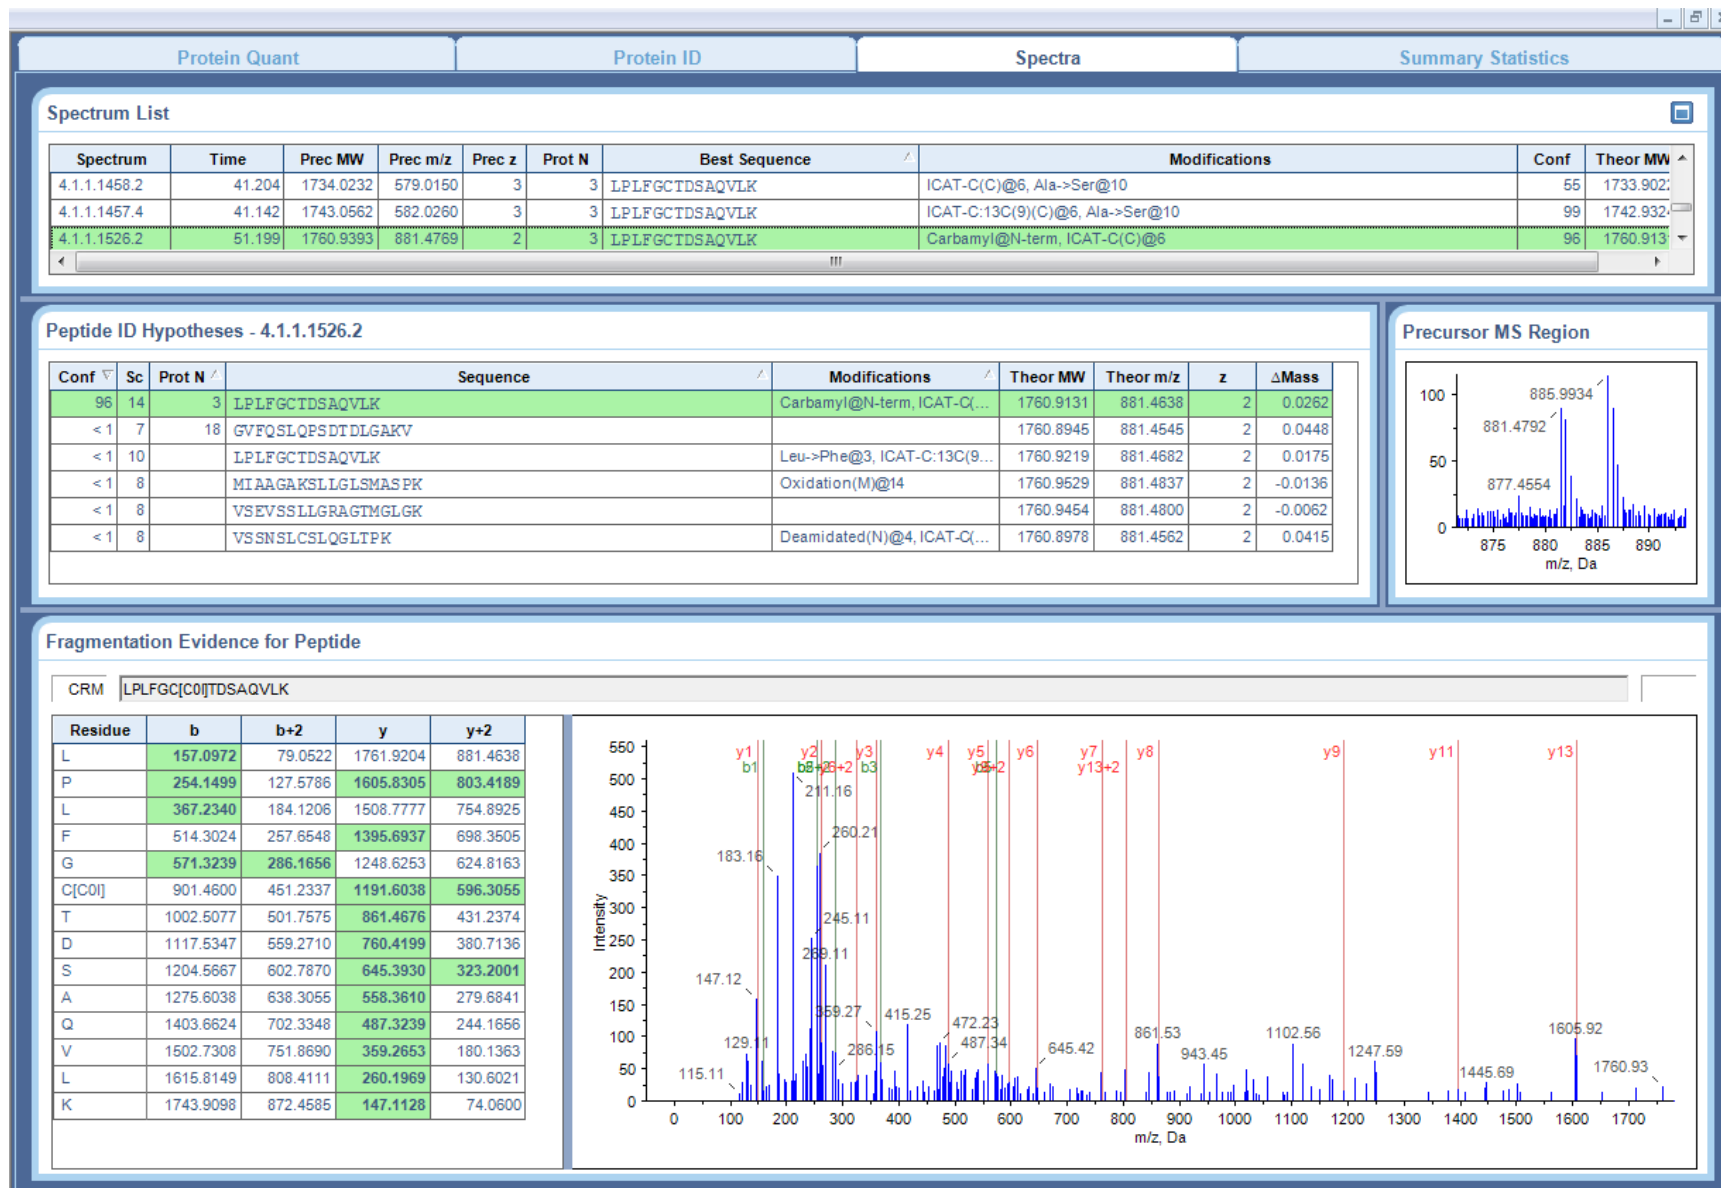



# Malate dehydrogenase, mitochondrial precursor GLNGVPDVVECSYVQSTITELPFFASK

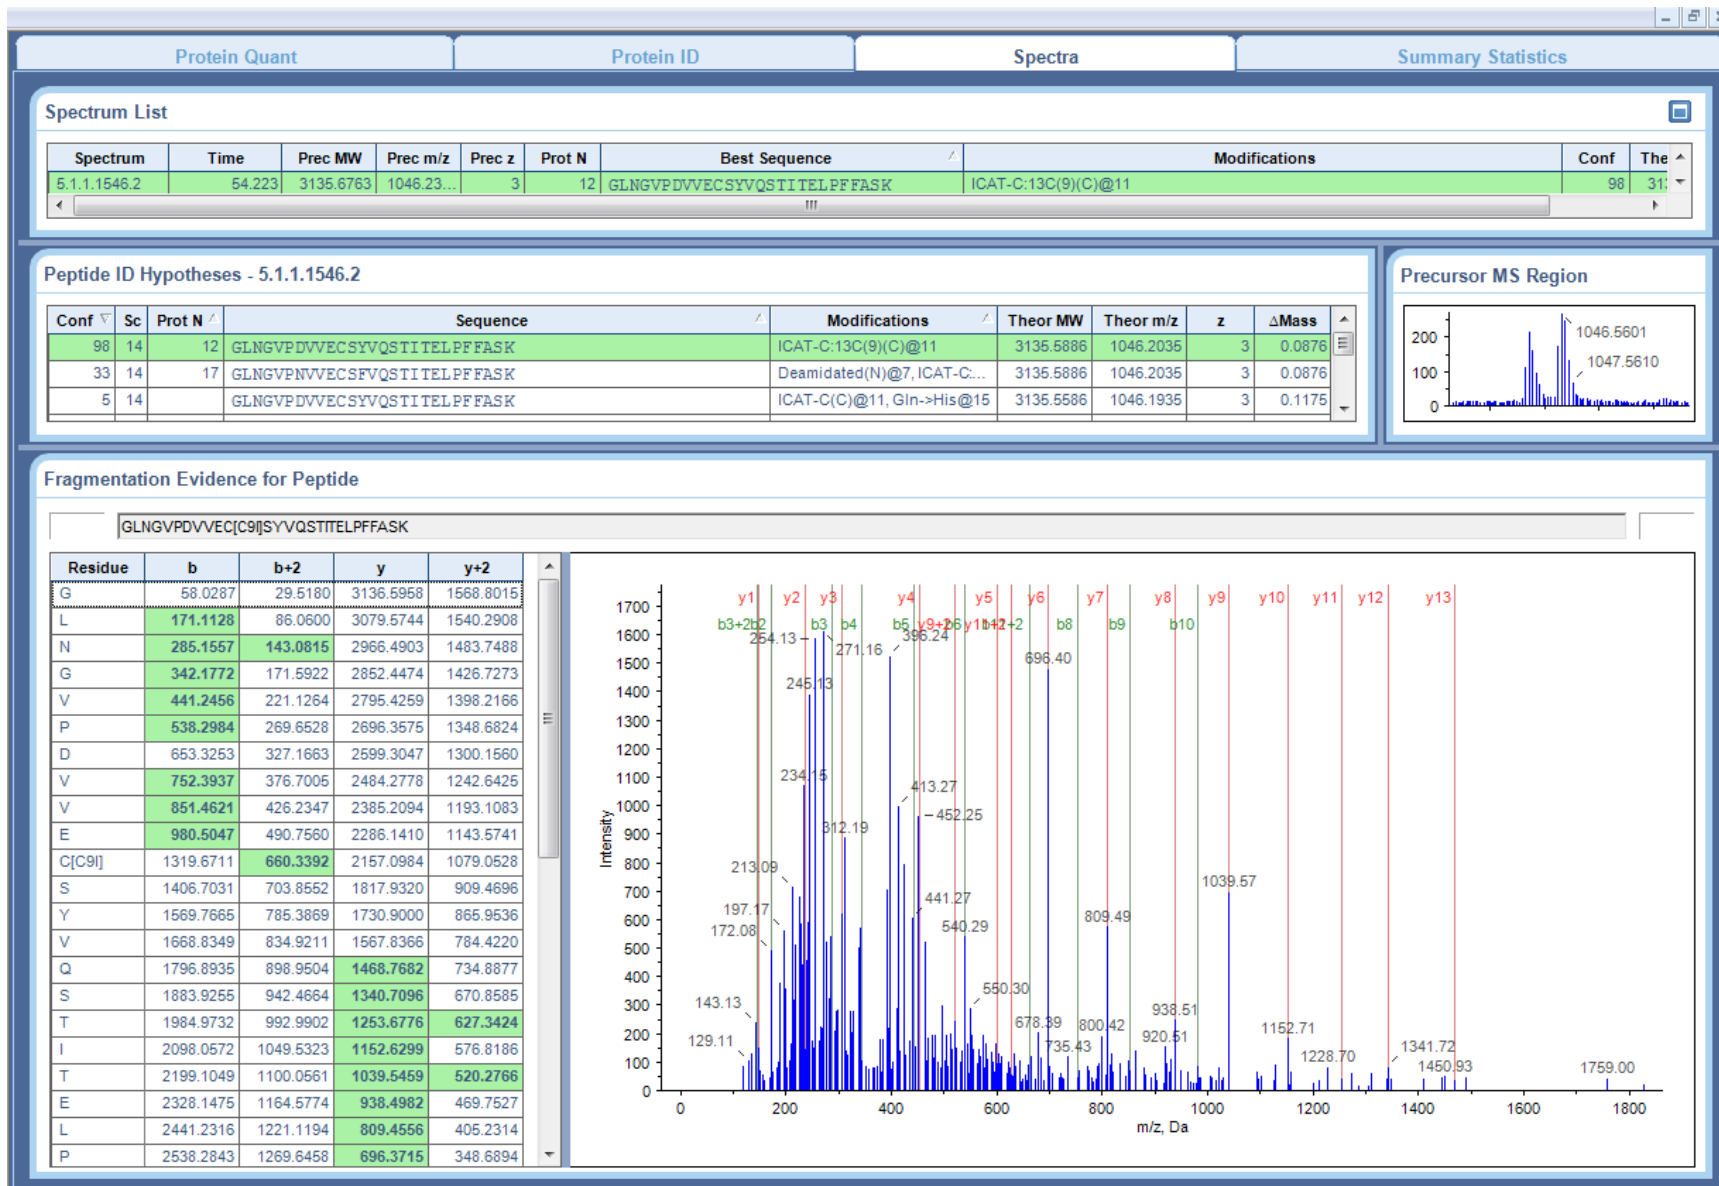

# Malate dehydrogenase, mitochondrial precursor AGKGSATLSMAYAGALFADACLK

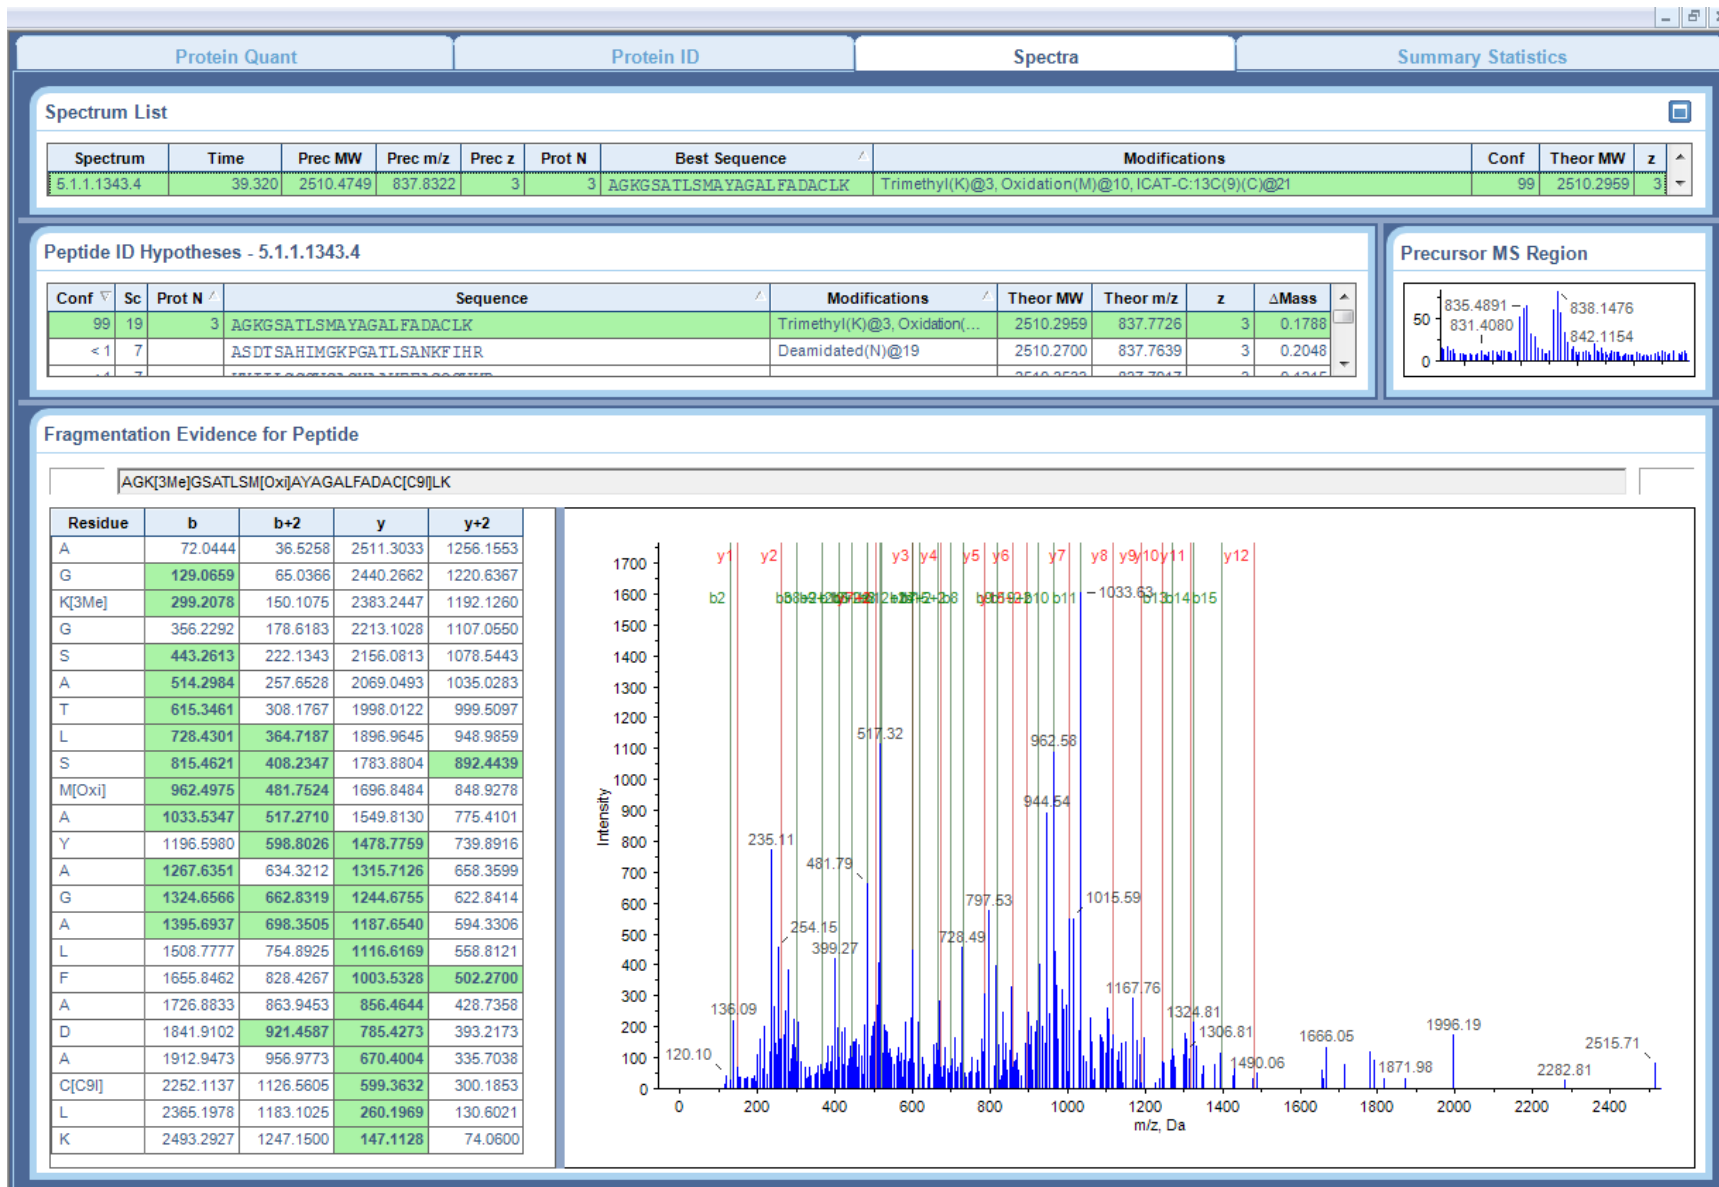

# Malate dehydrogenase, mitochondrial precursor YCPHALVNMISNPVNSTVPIAAEIFKK

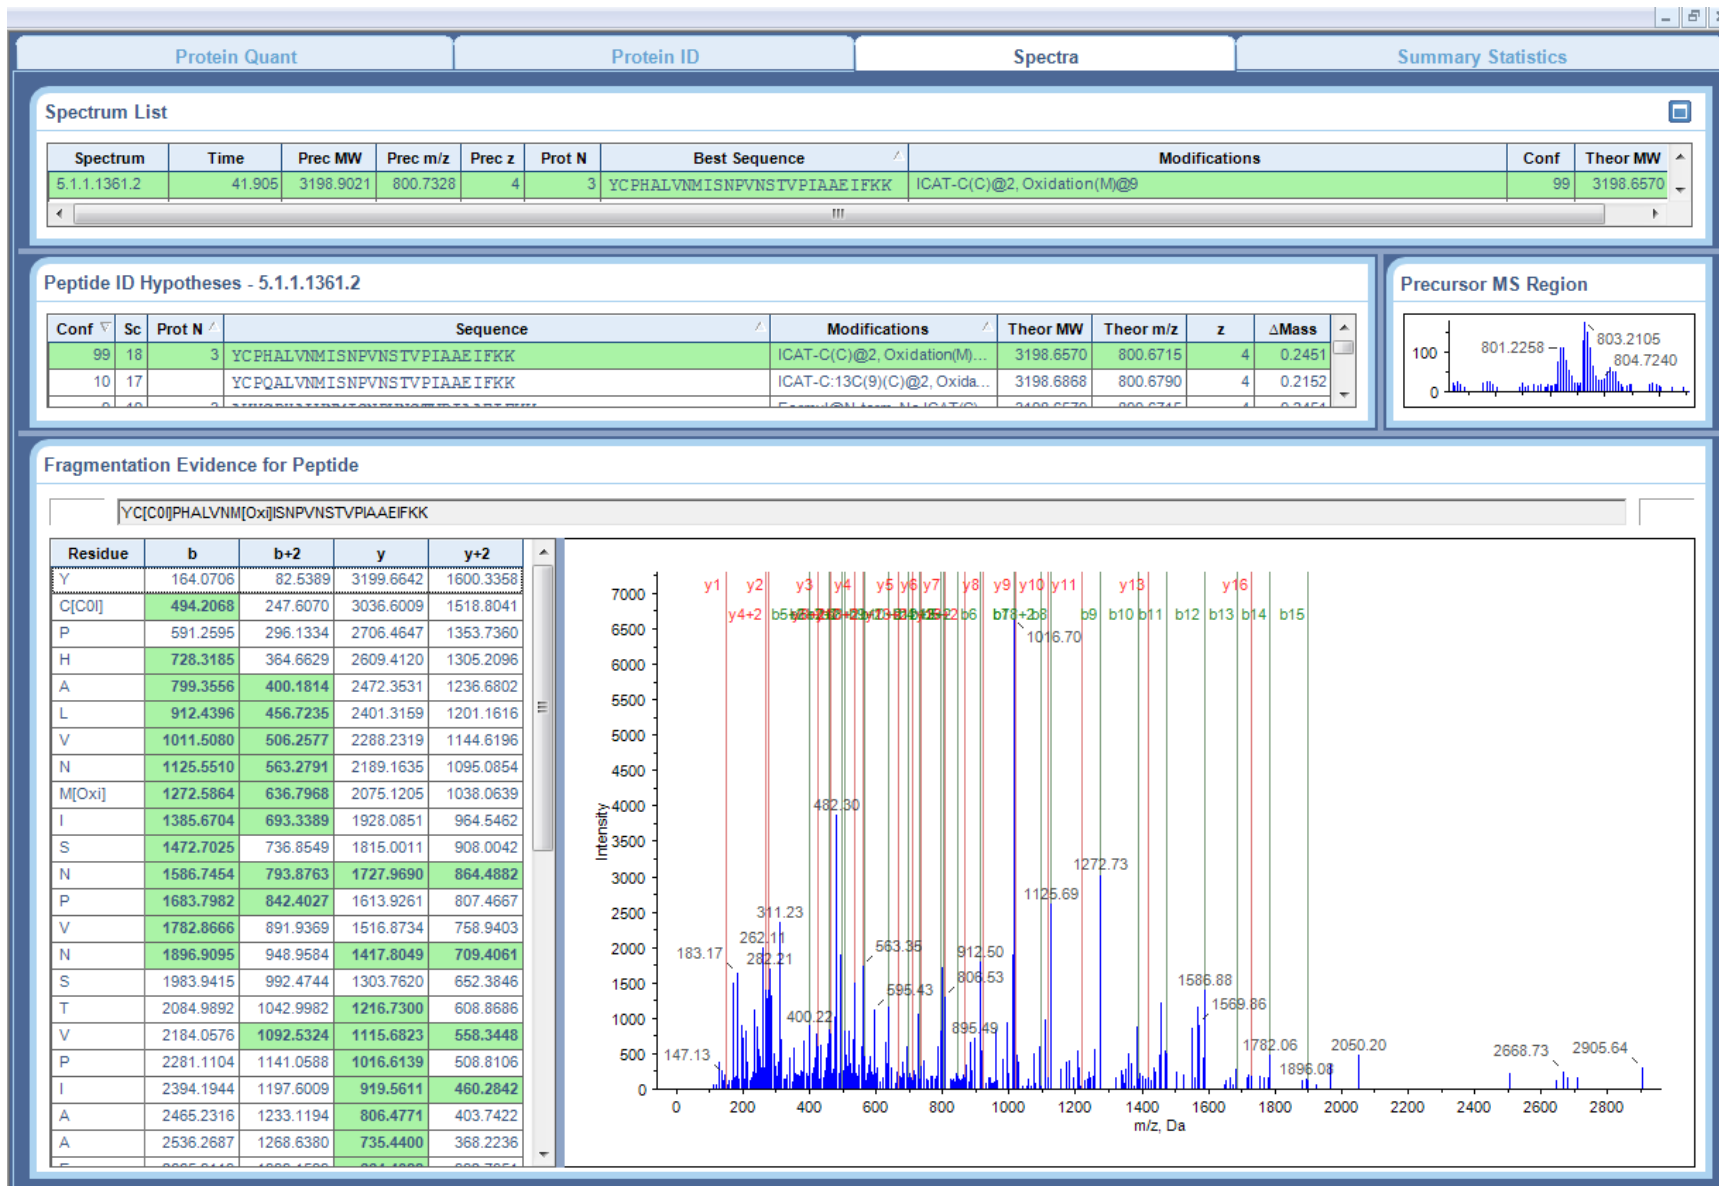

# ADP-glucose pyrophosphorylase small subunit

## SCISEGAIIEDTLLMGADYYETDADR

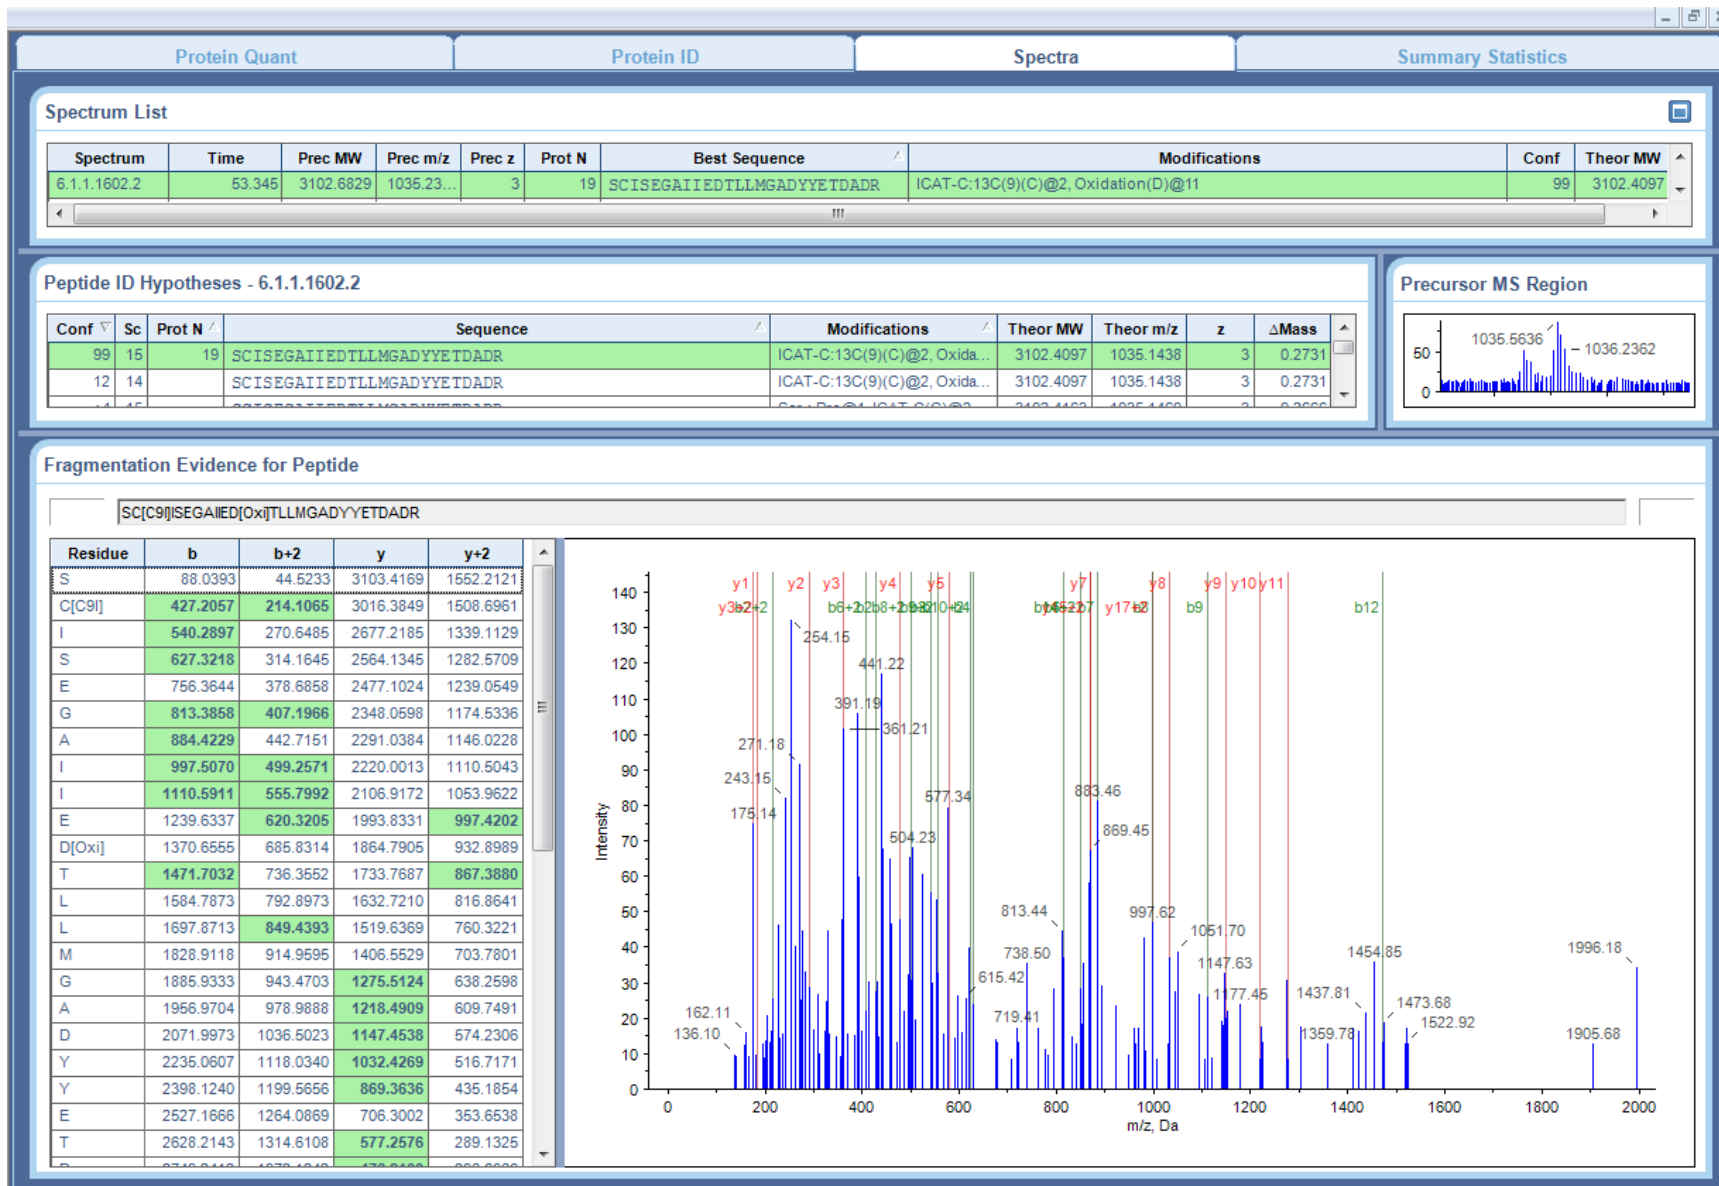

# Putative aldehyde dehydrogenase LGPALACGNTVVLK

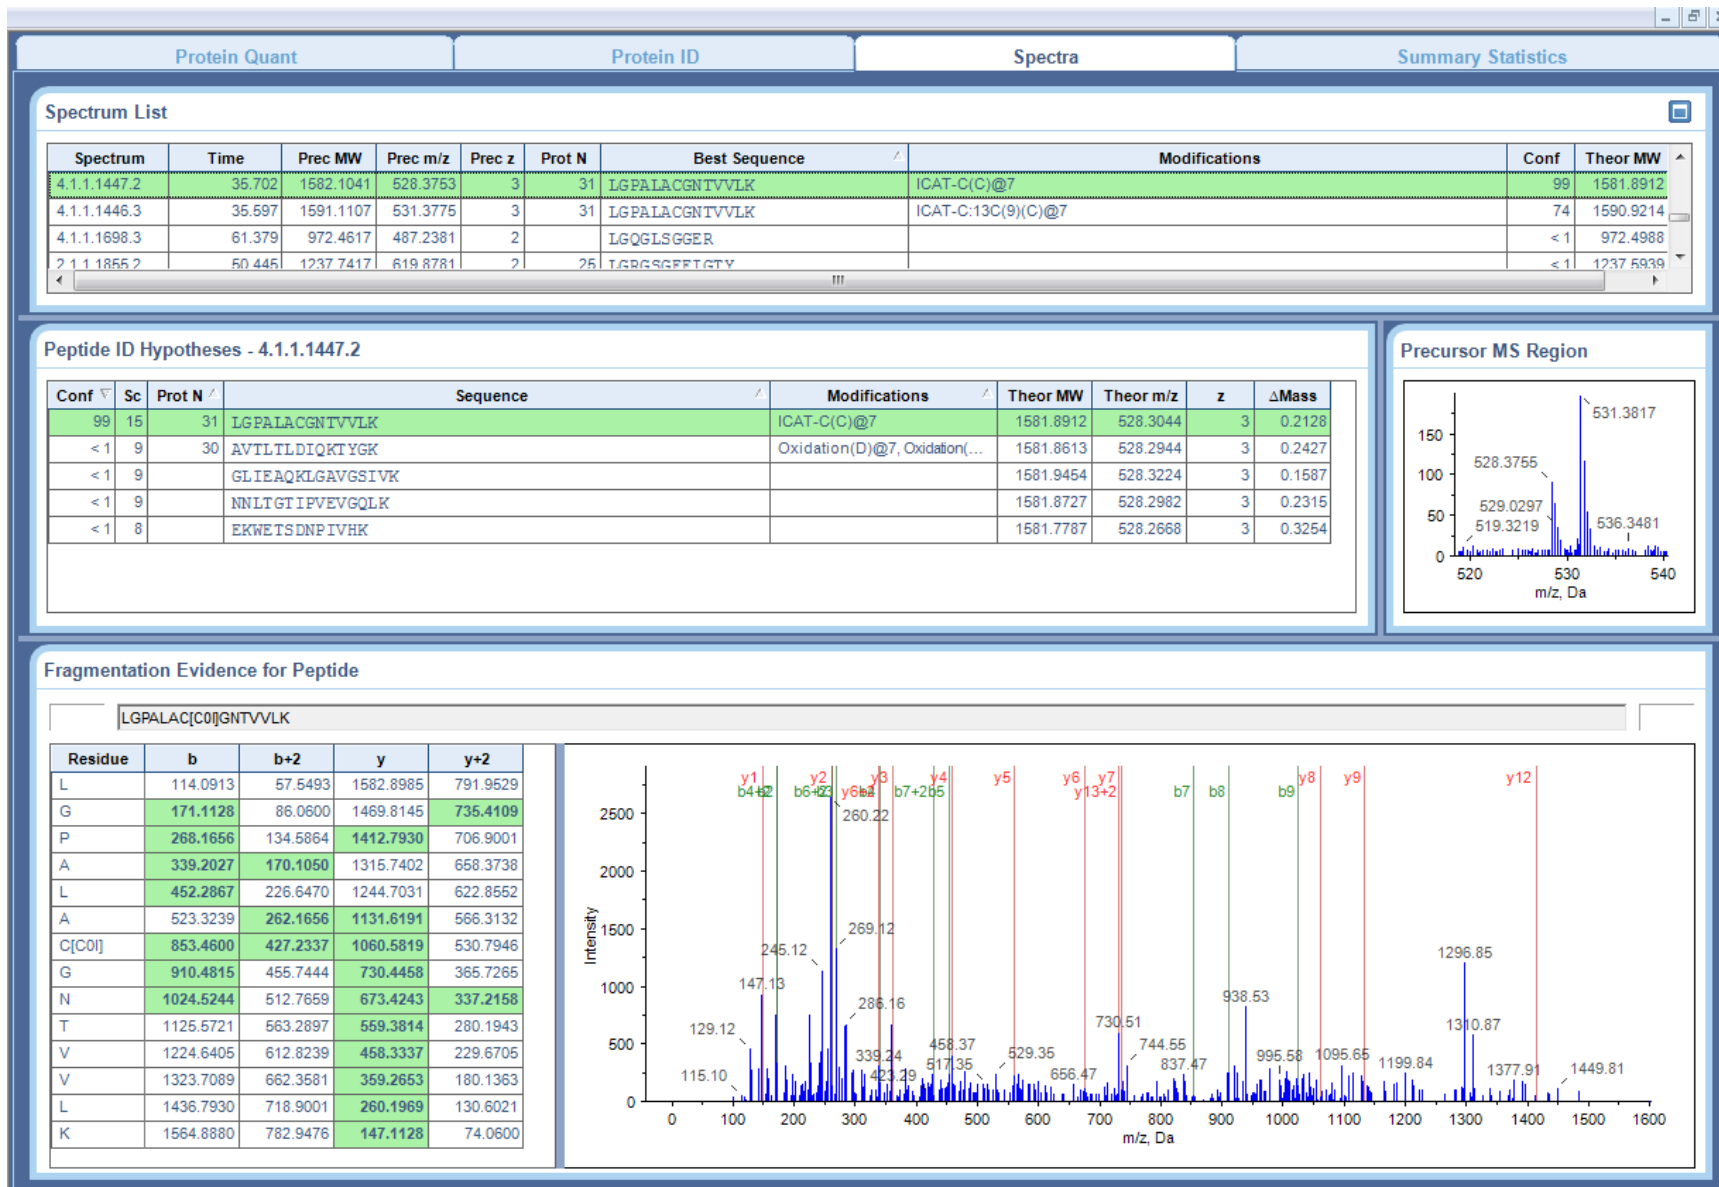

# 3-isopropylmalate dehydratase-like protein (small subunit) EHAPVCLGAAGAK

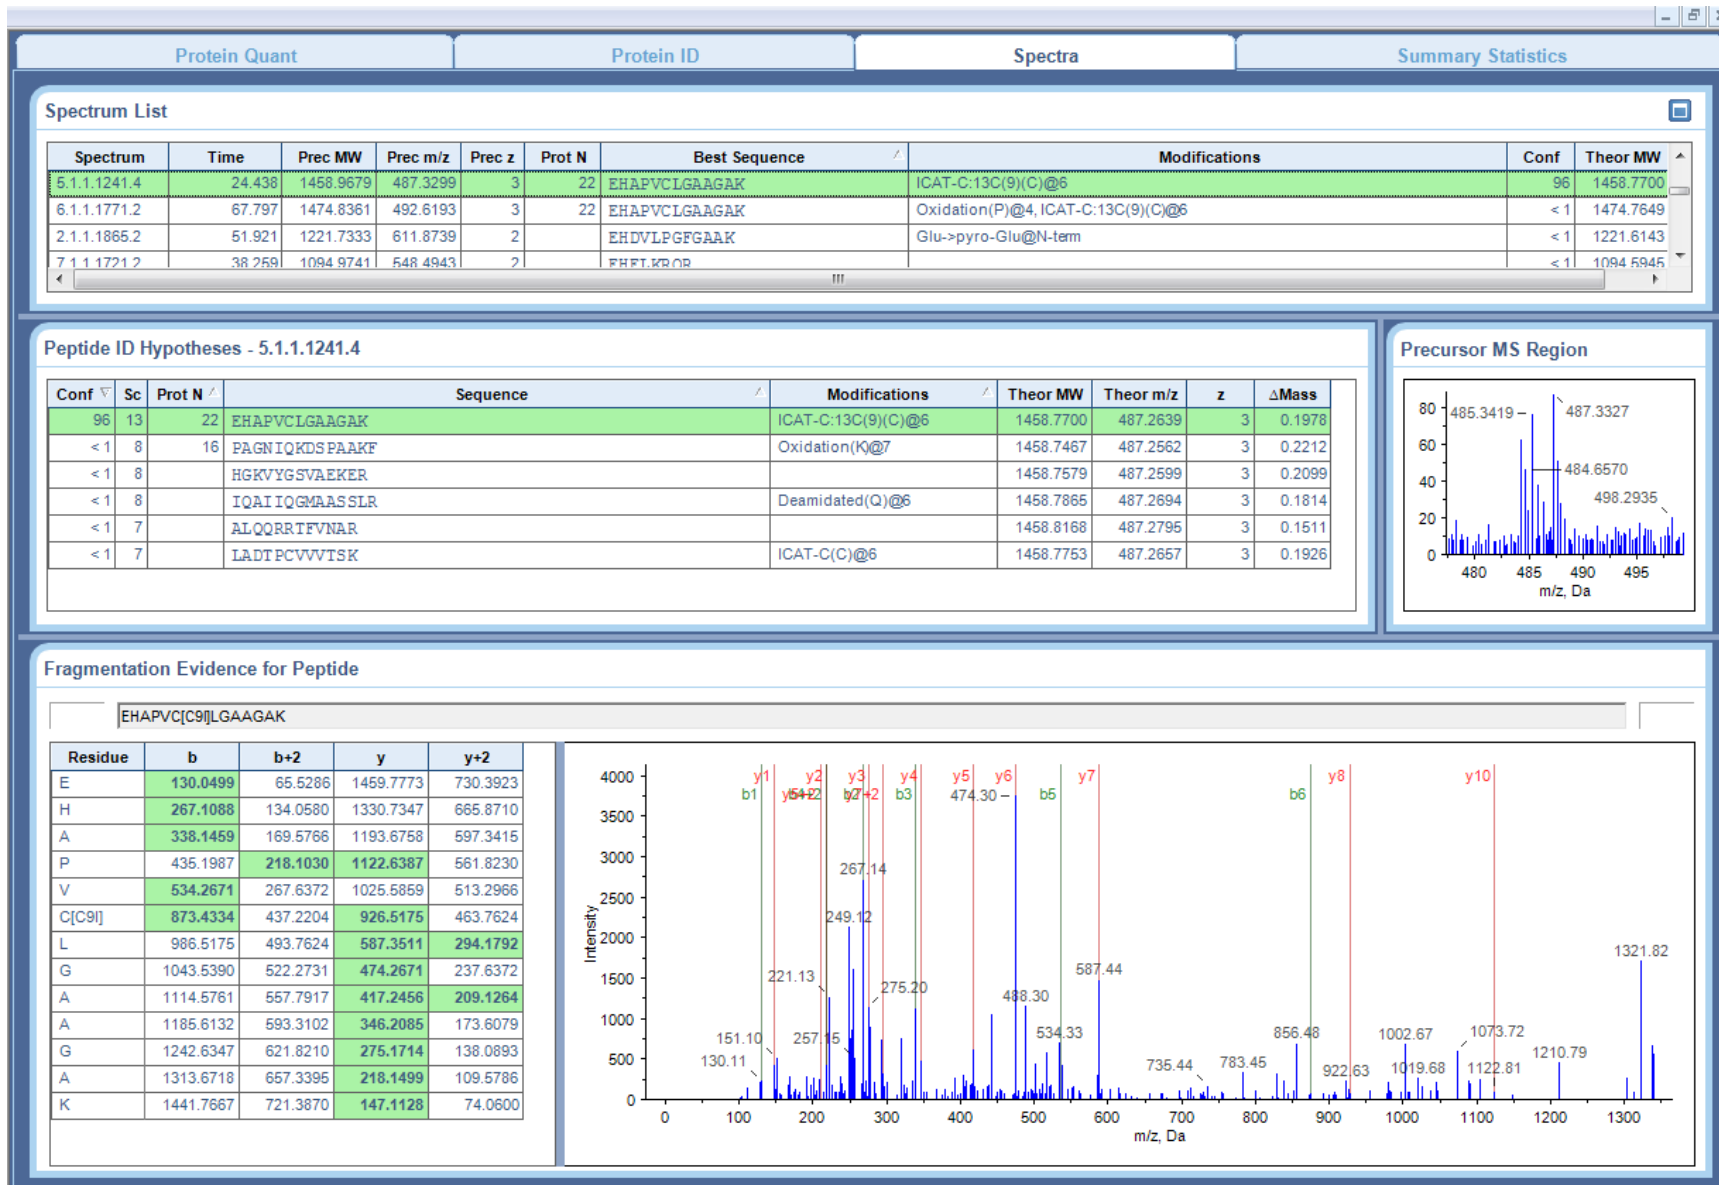

# Aspartate aminotransferase Asp2 VGALSIVCK

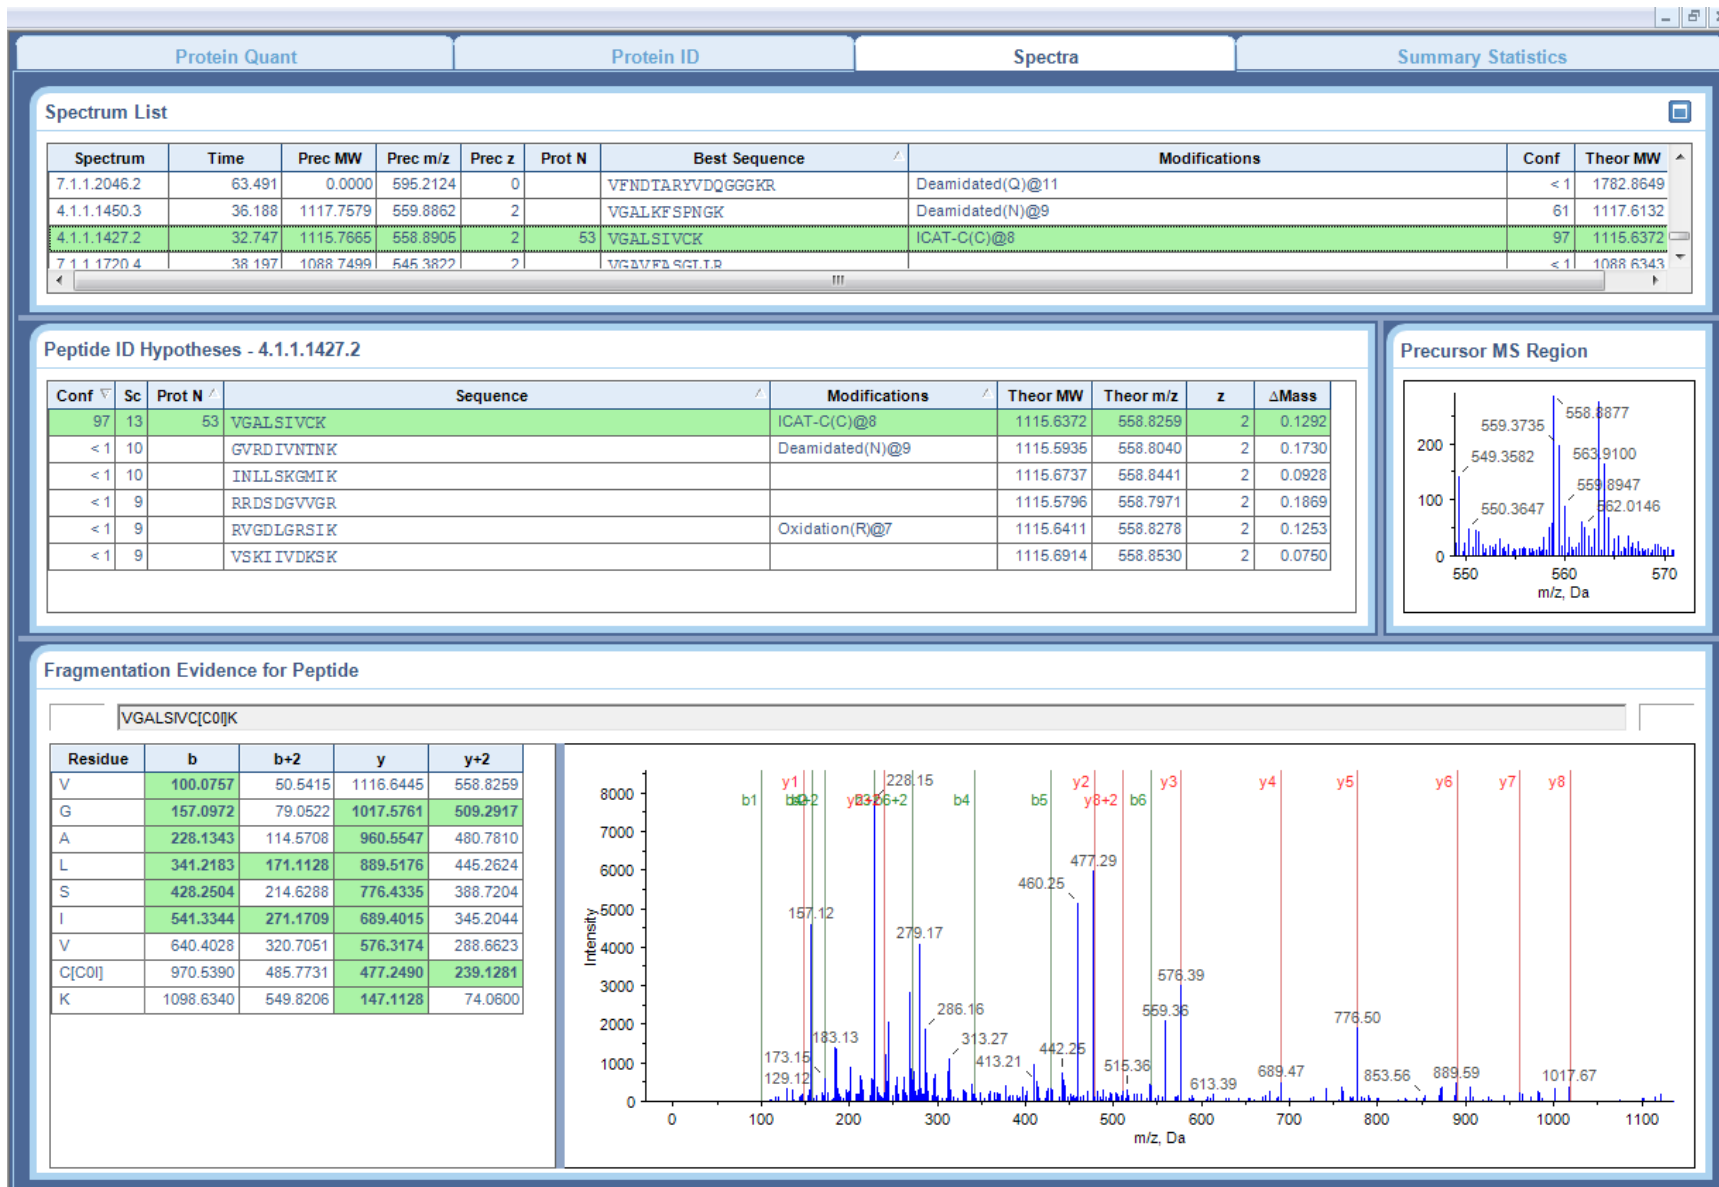

# Oxalic acid oxidase AETPAGYPCIRPIHK

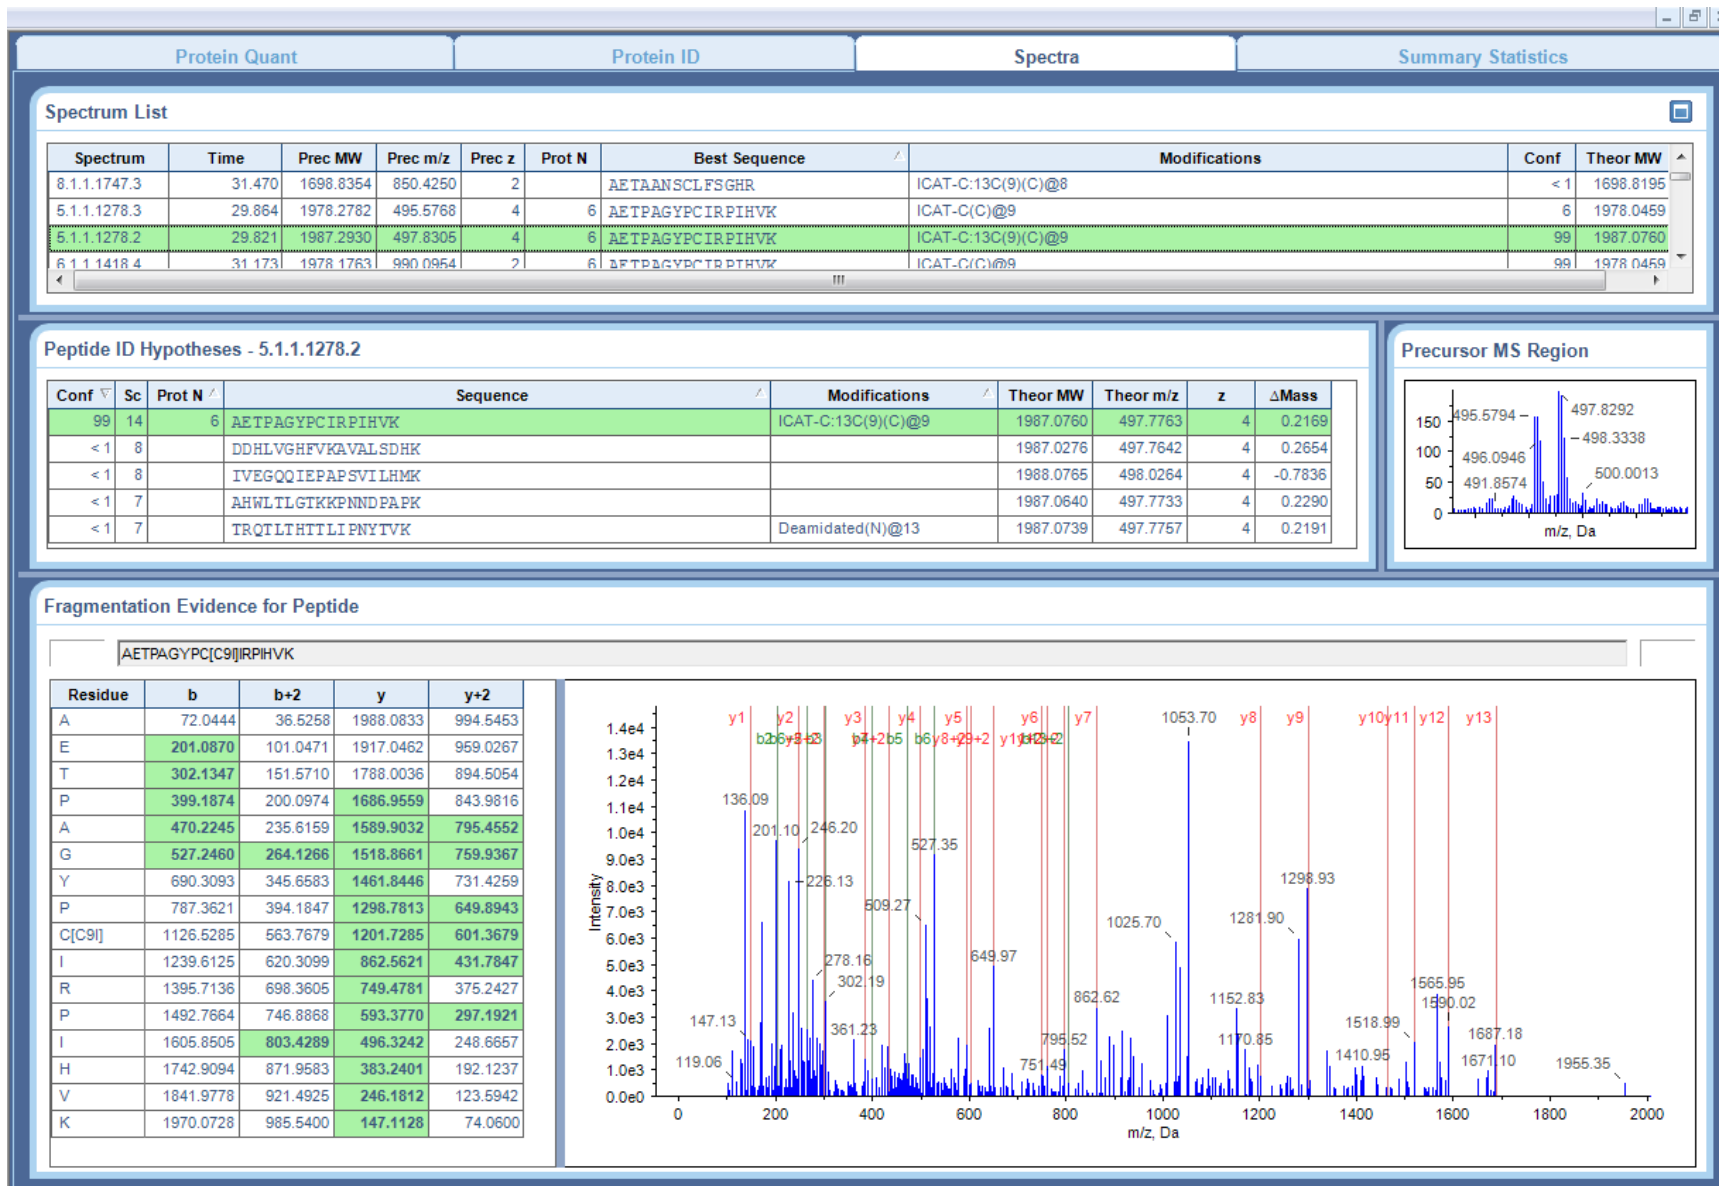



# homocysteine S-methyltransferase CVKPPVIYGDVSRPK

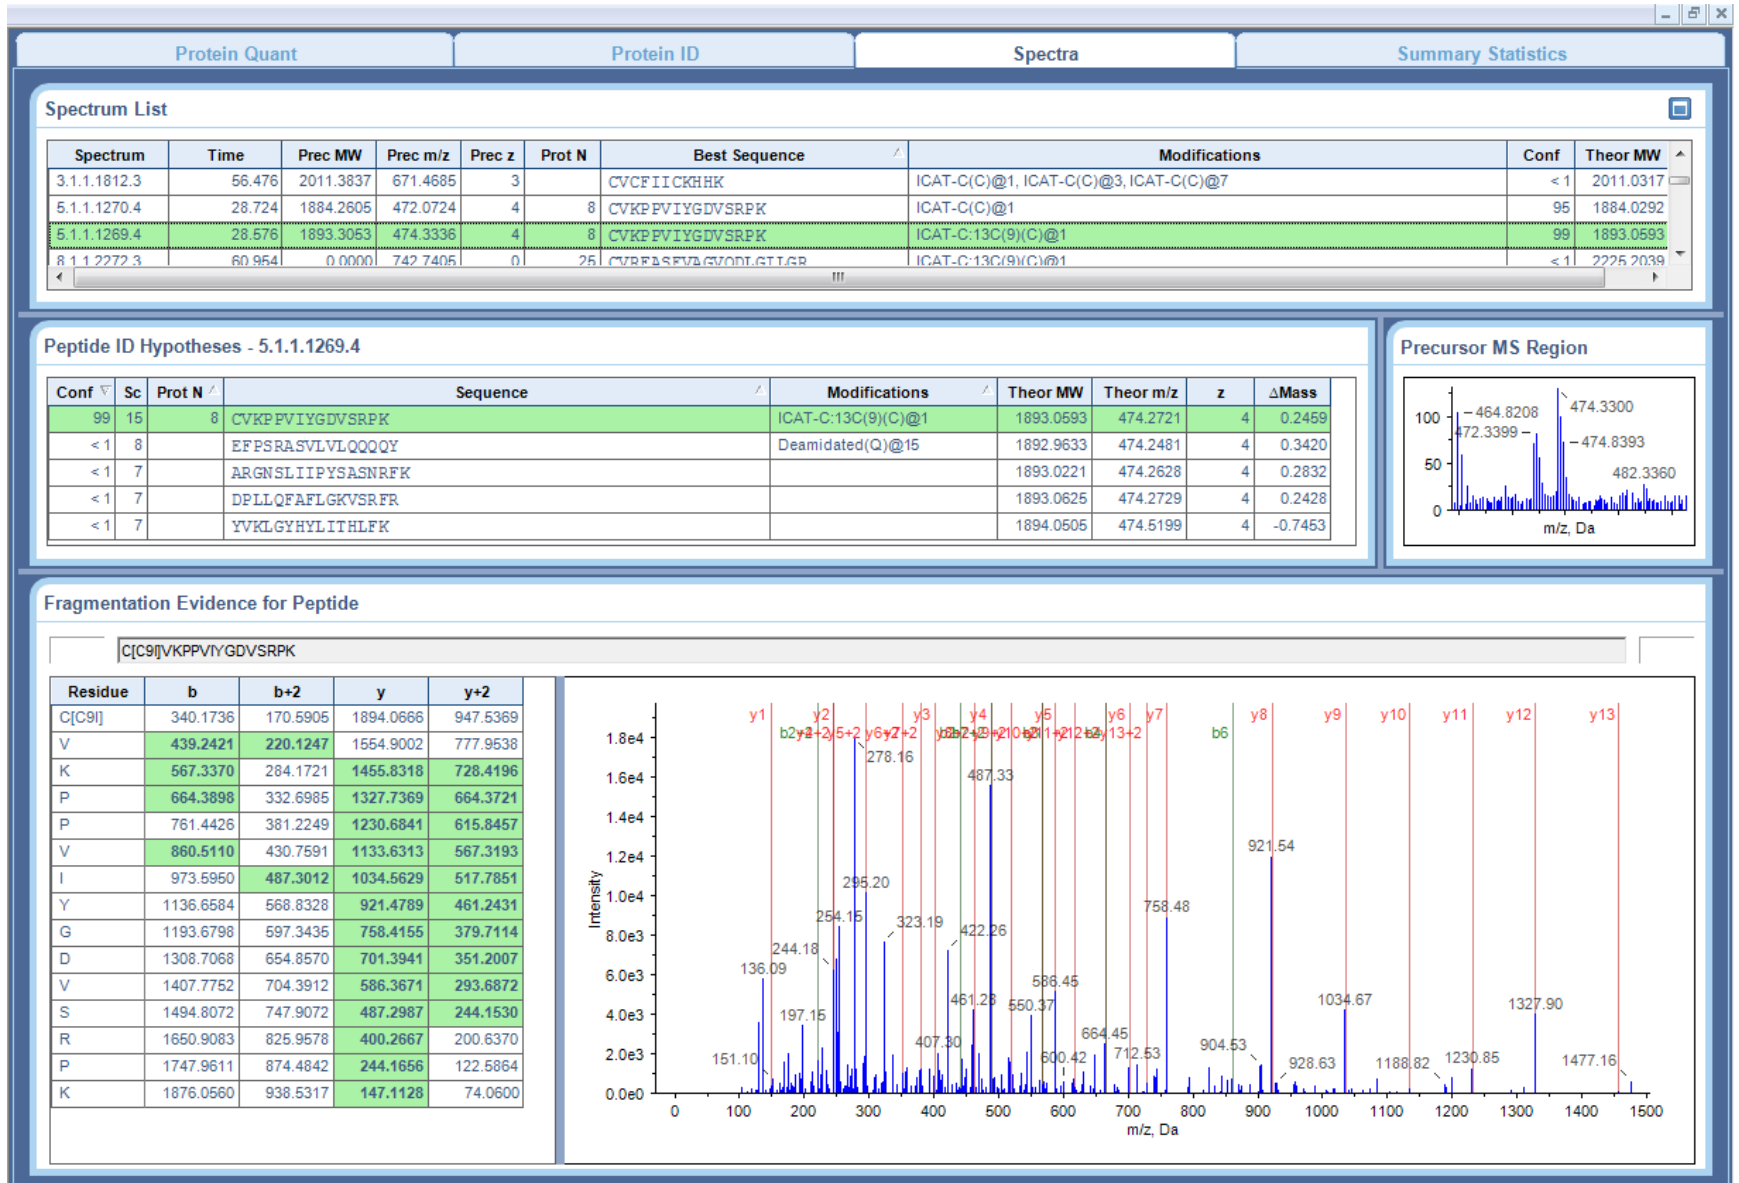

# Streptomyces cyclase/dehydrase family protein SELAQSIAEFHTYHLGPGSCSSLHAQR

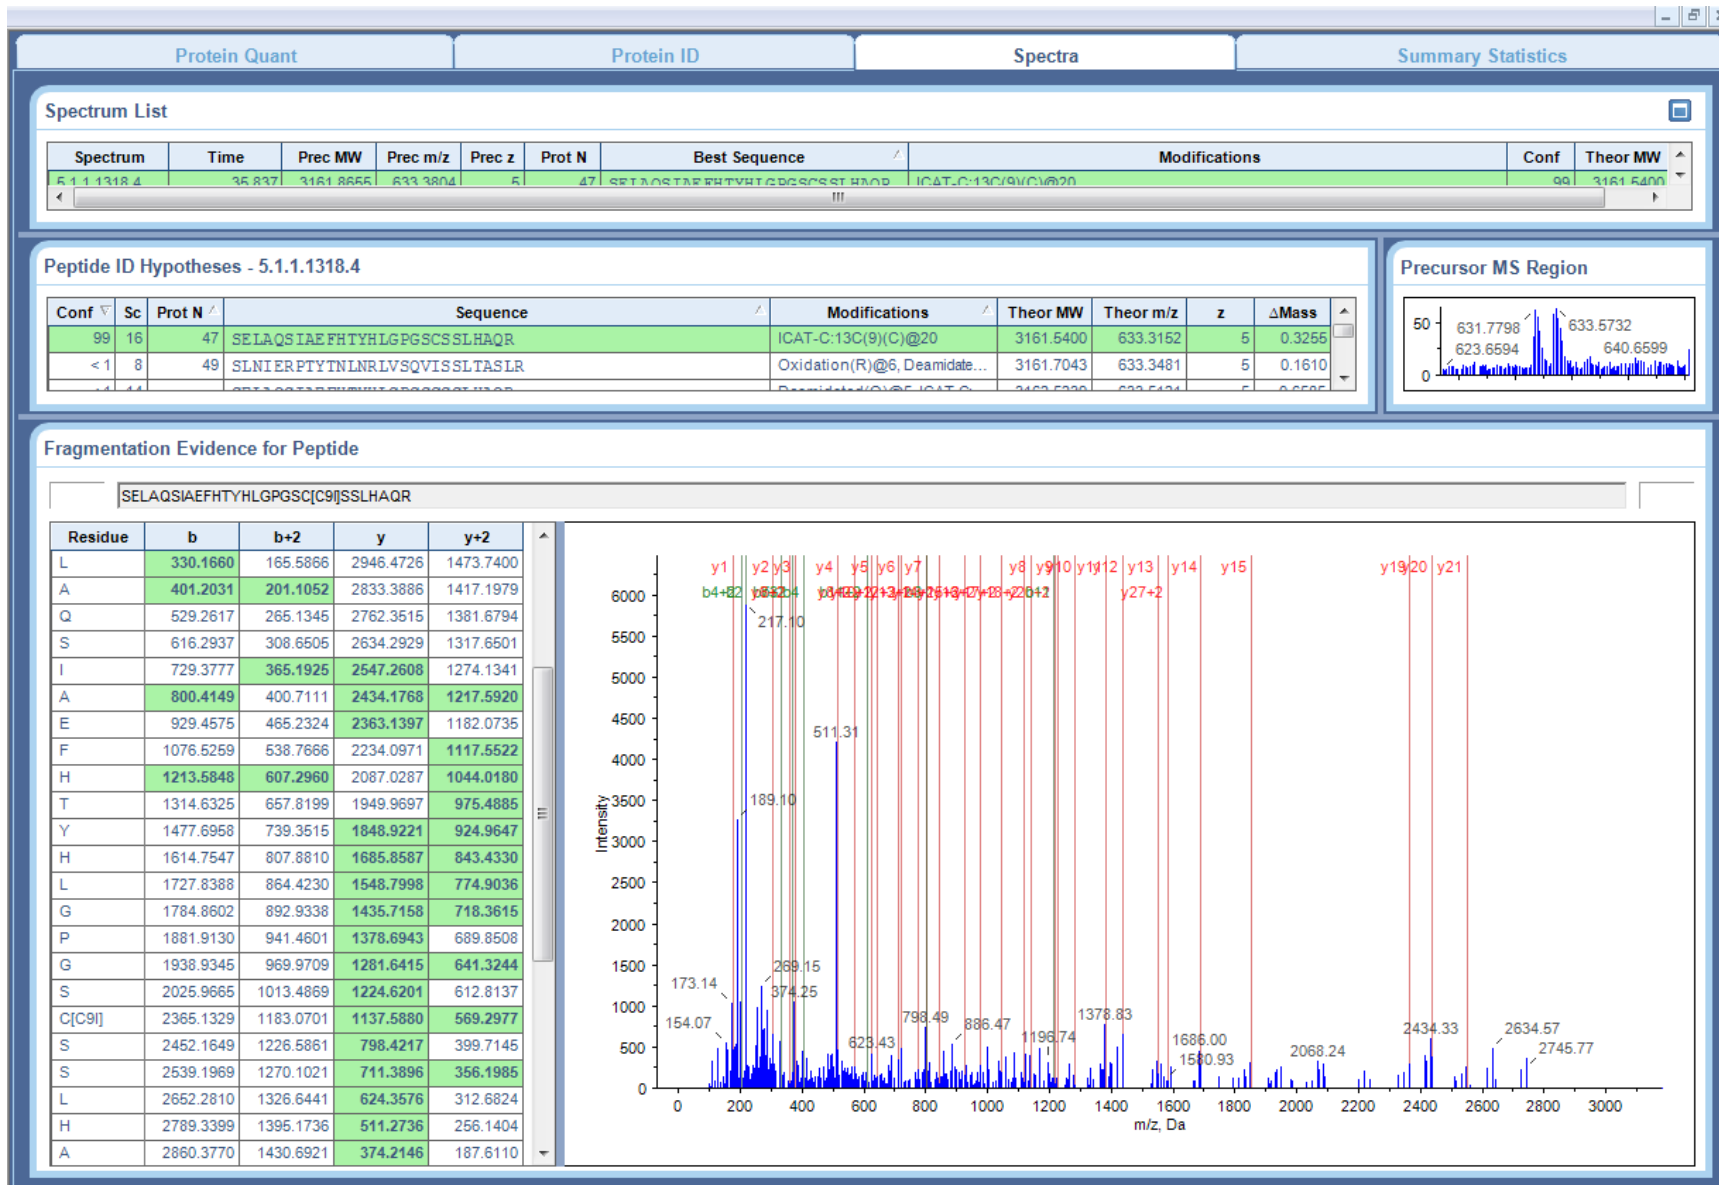

# Arabidopsis Rab GTPase homolog E1b HYAHVDCCPGHADYVK

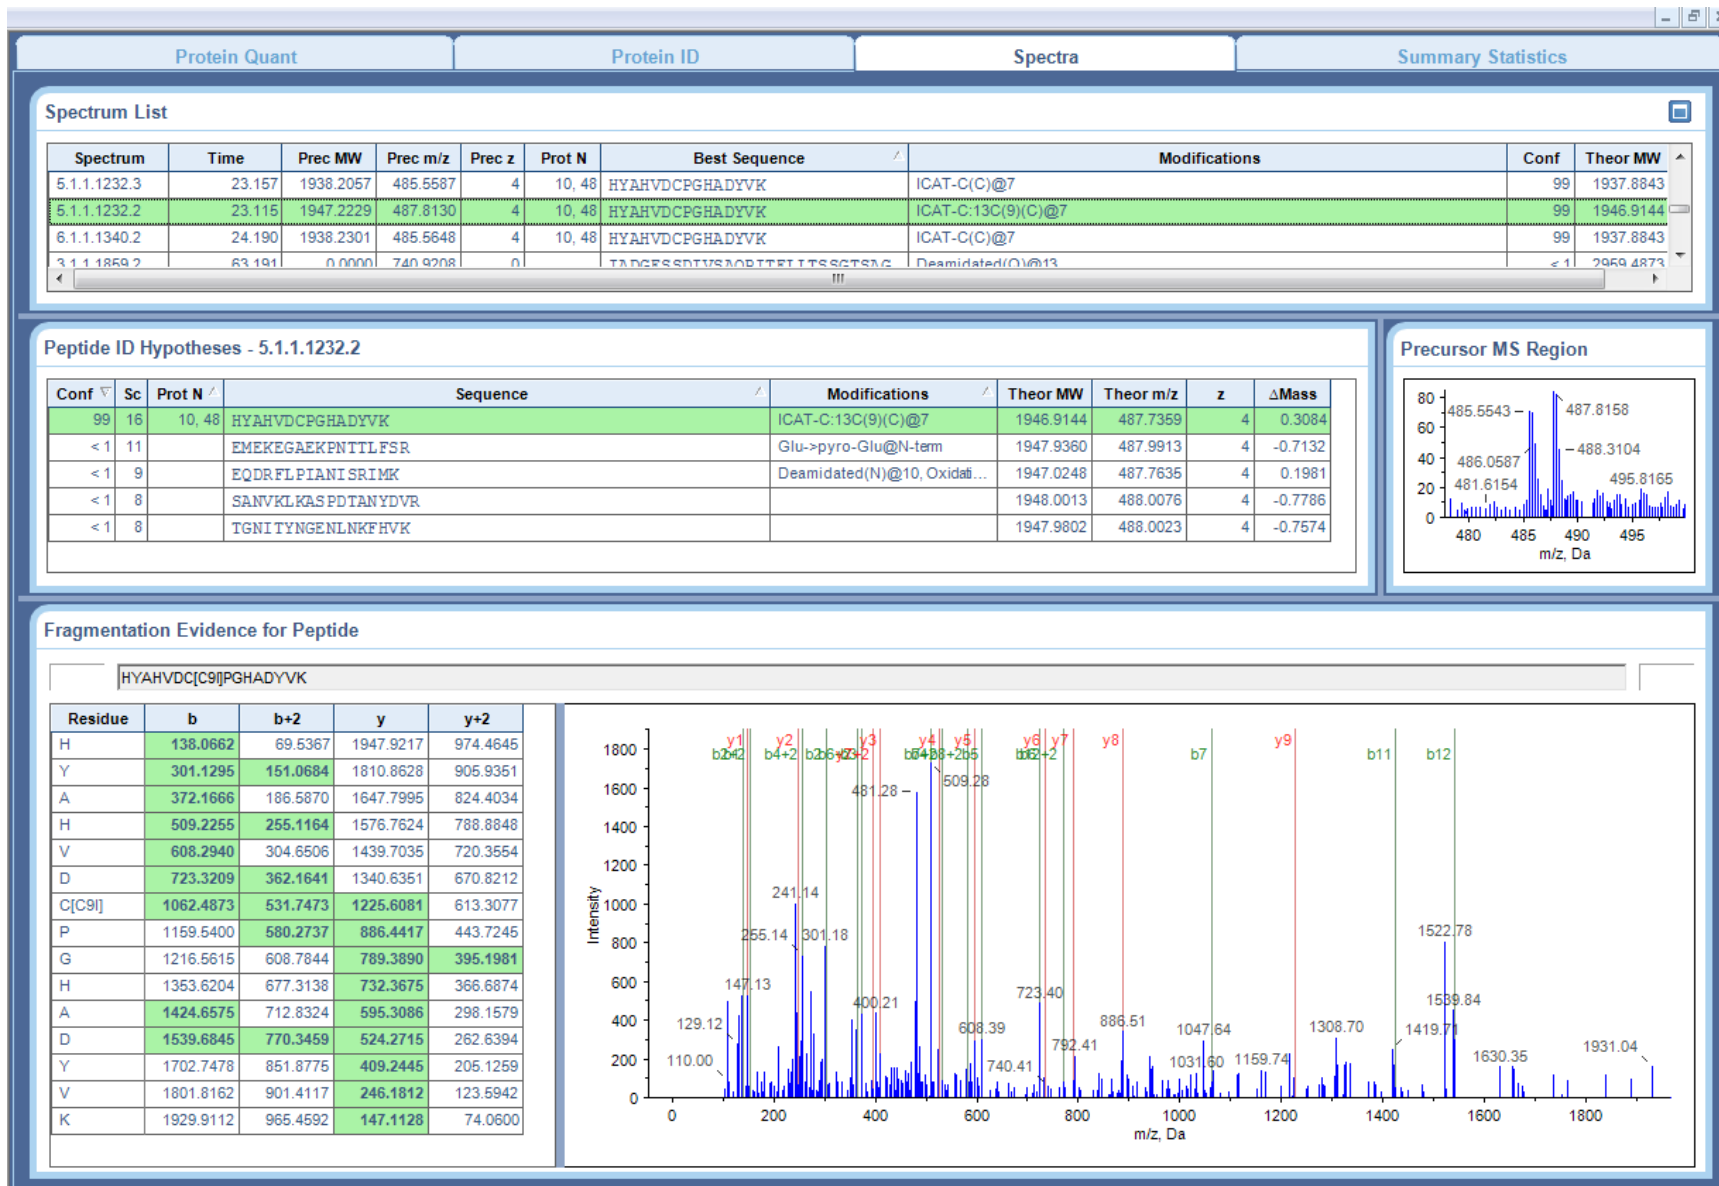

# Arabidopsis Rab GTPase homolog E1b IVVELIVPVACEQGMR

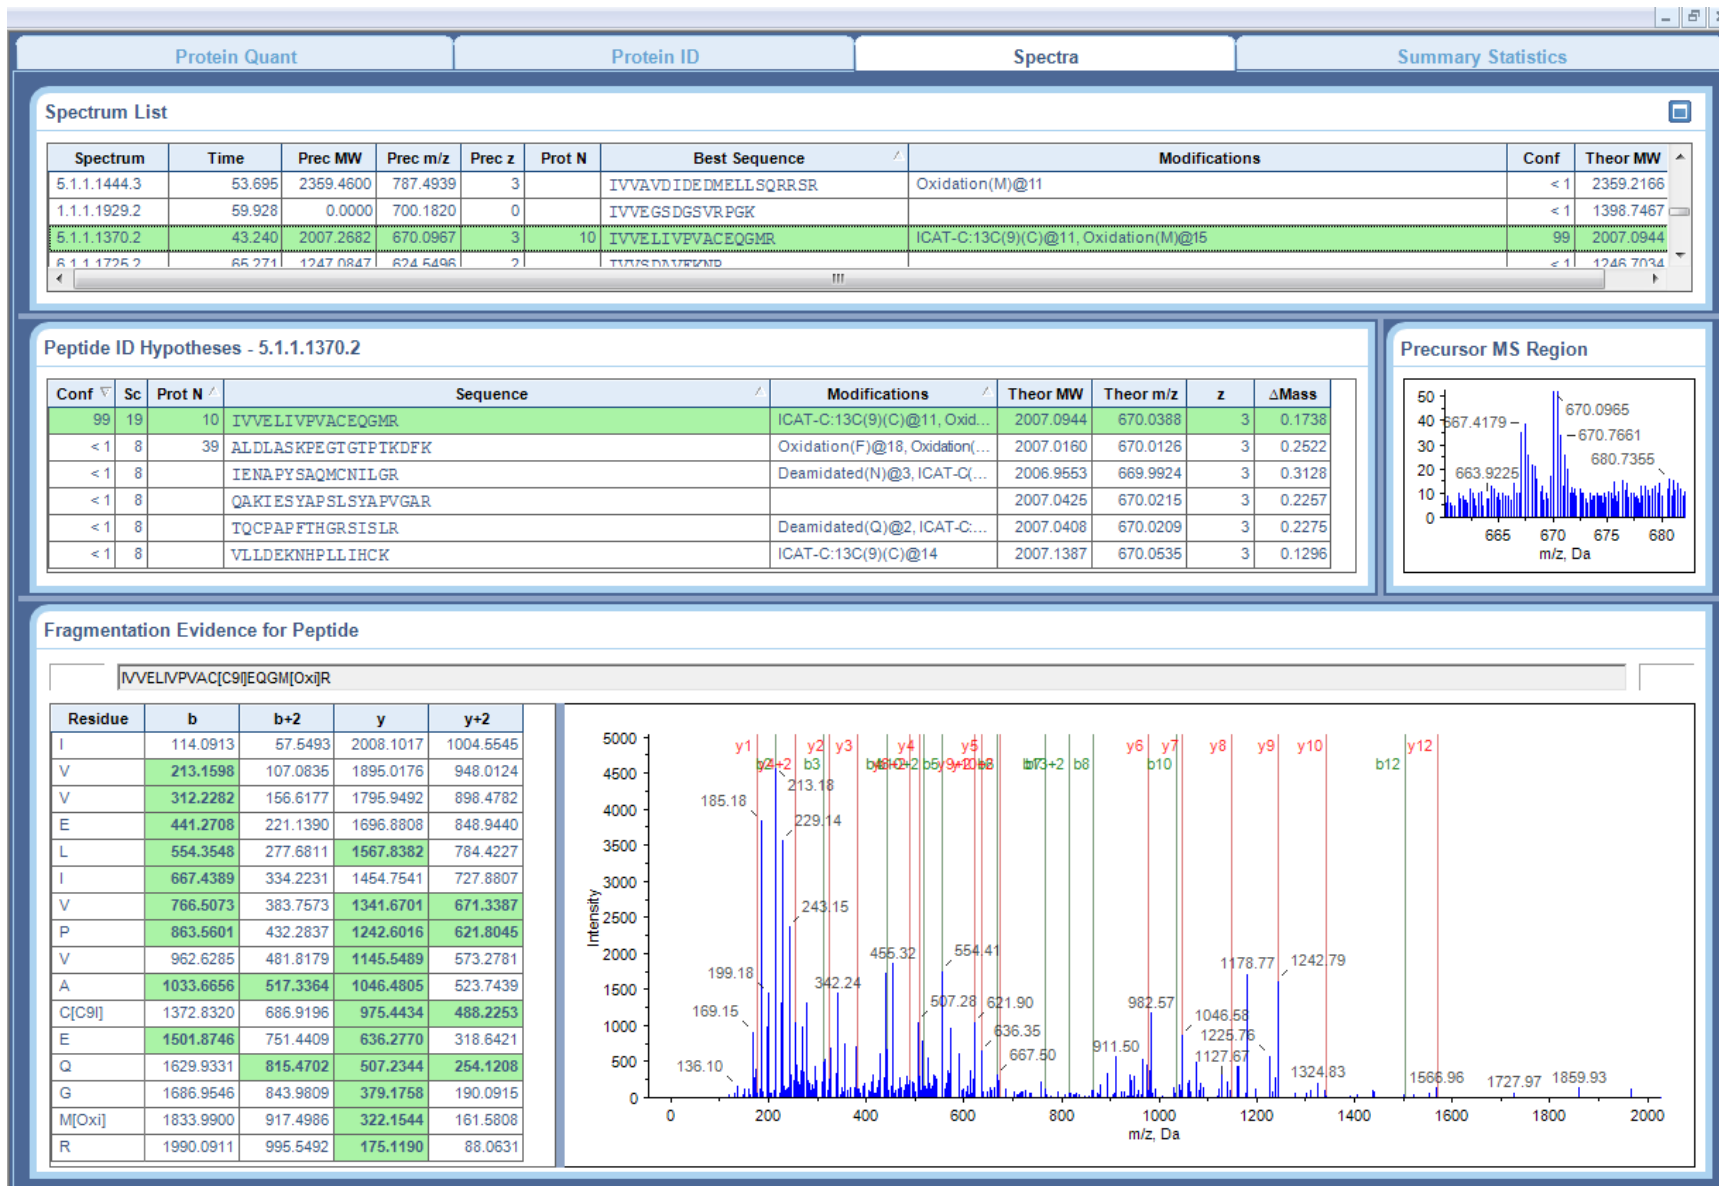

# Multicatalytic endopeptidase complex

## ITQLTDNVYVCR

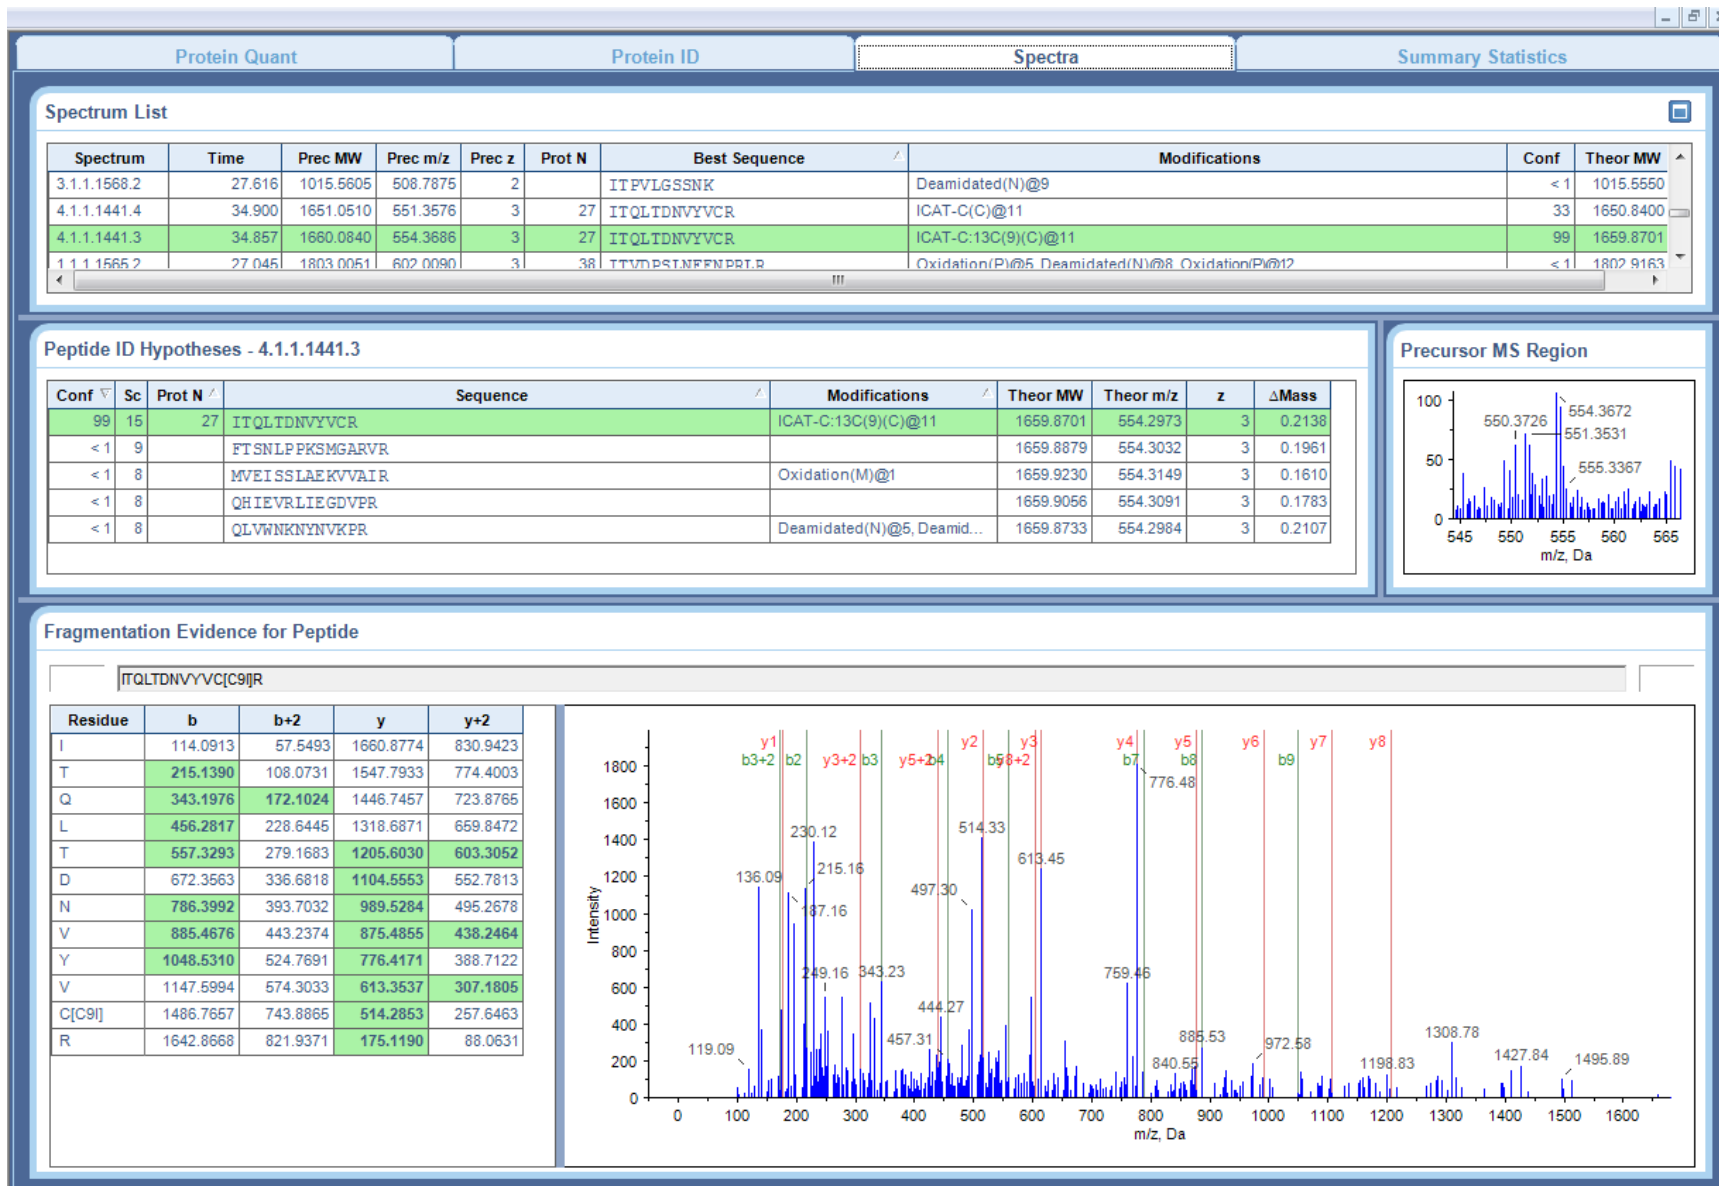

# Myrosinase

## QIIQDFKDYADLCFK

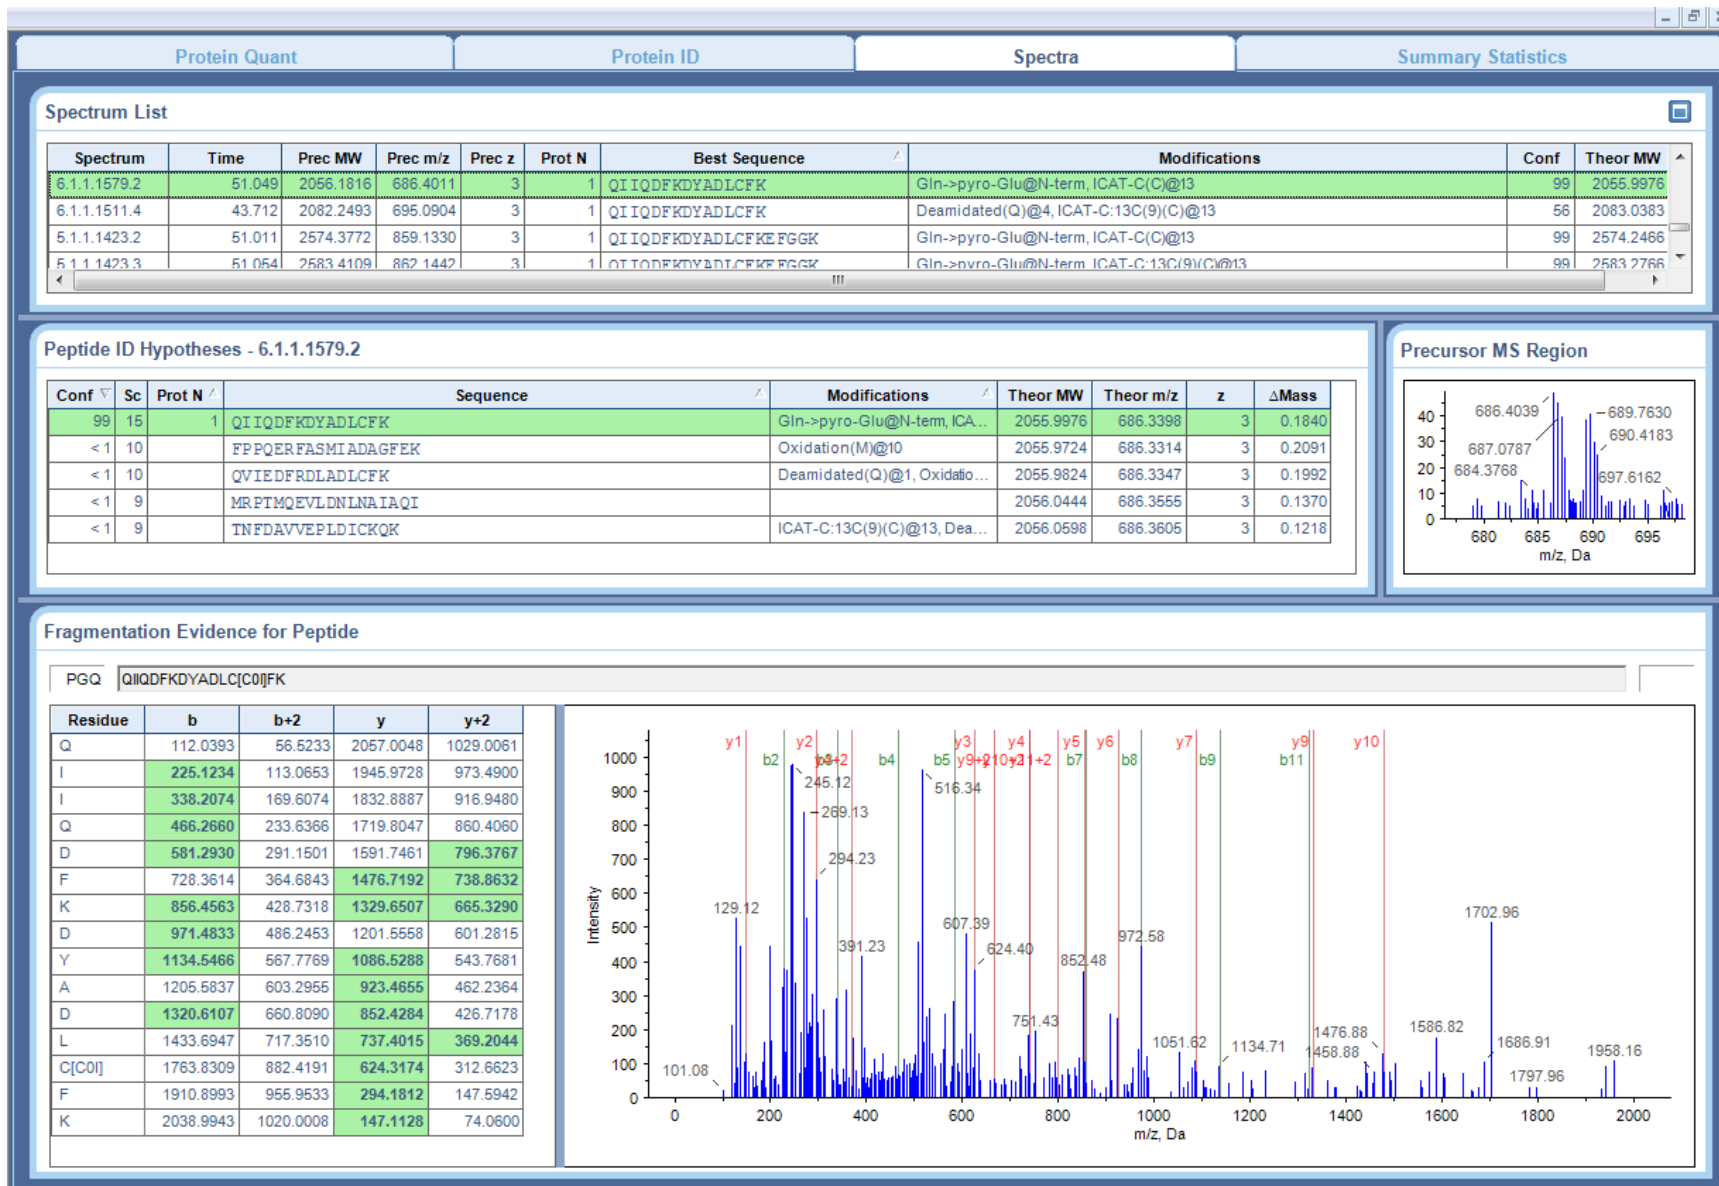

# Myrosinase

## CSPMVDTKHRCYGGNSSTEPYIVAHNQLLAHATVVDLYR

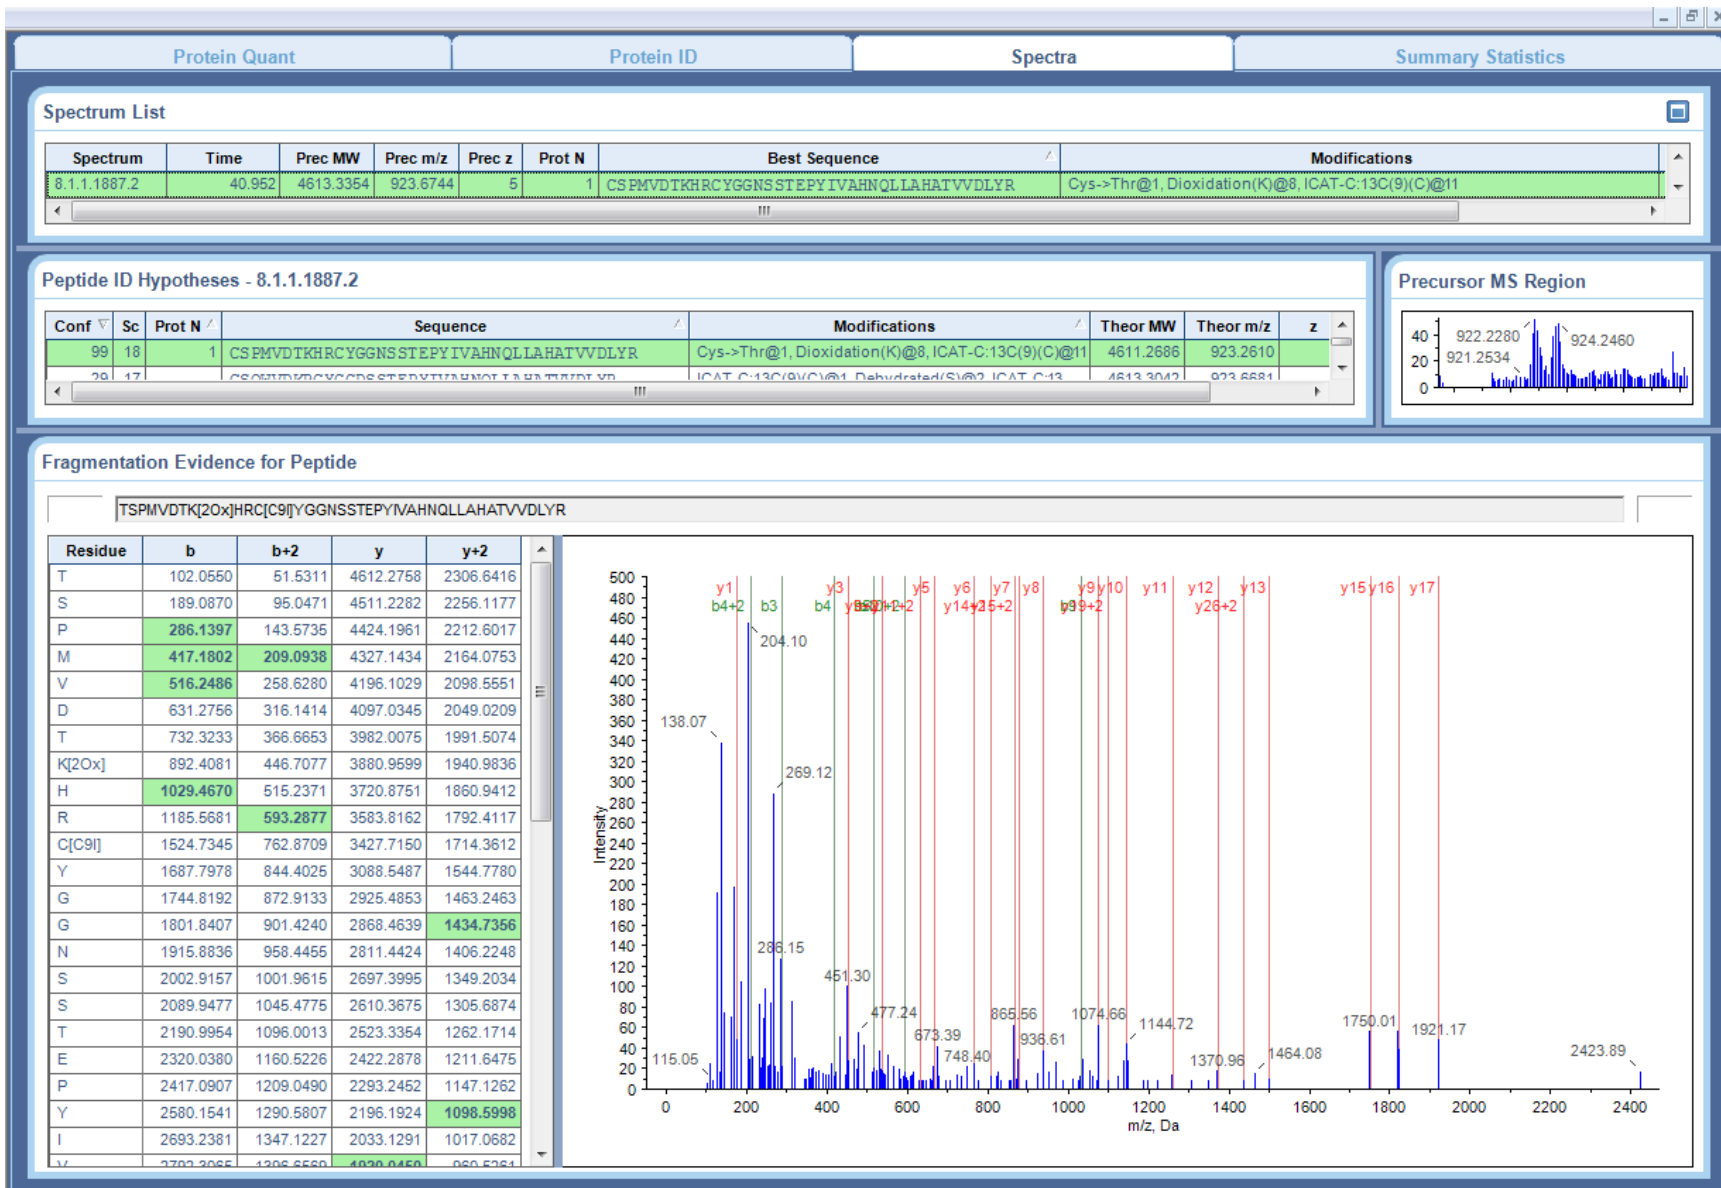

# Extensin-like protein IPASICQLPK

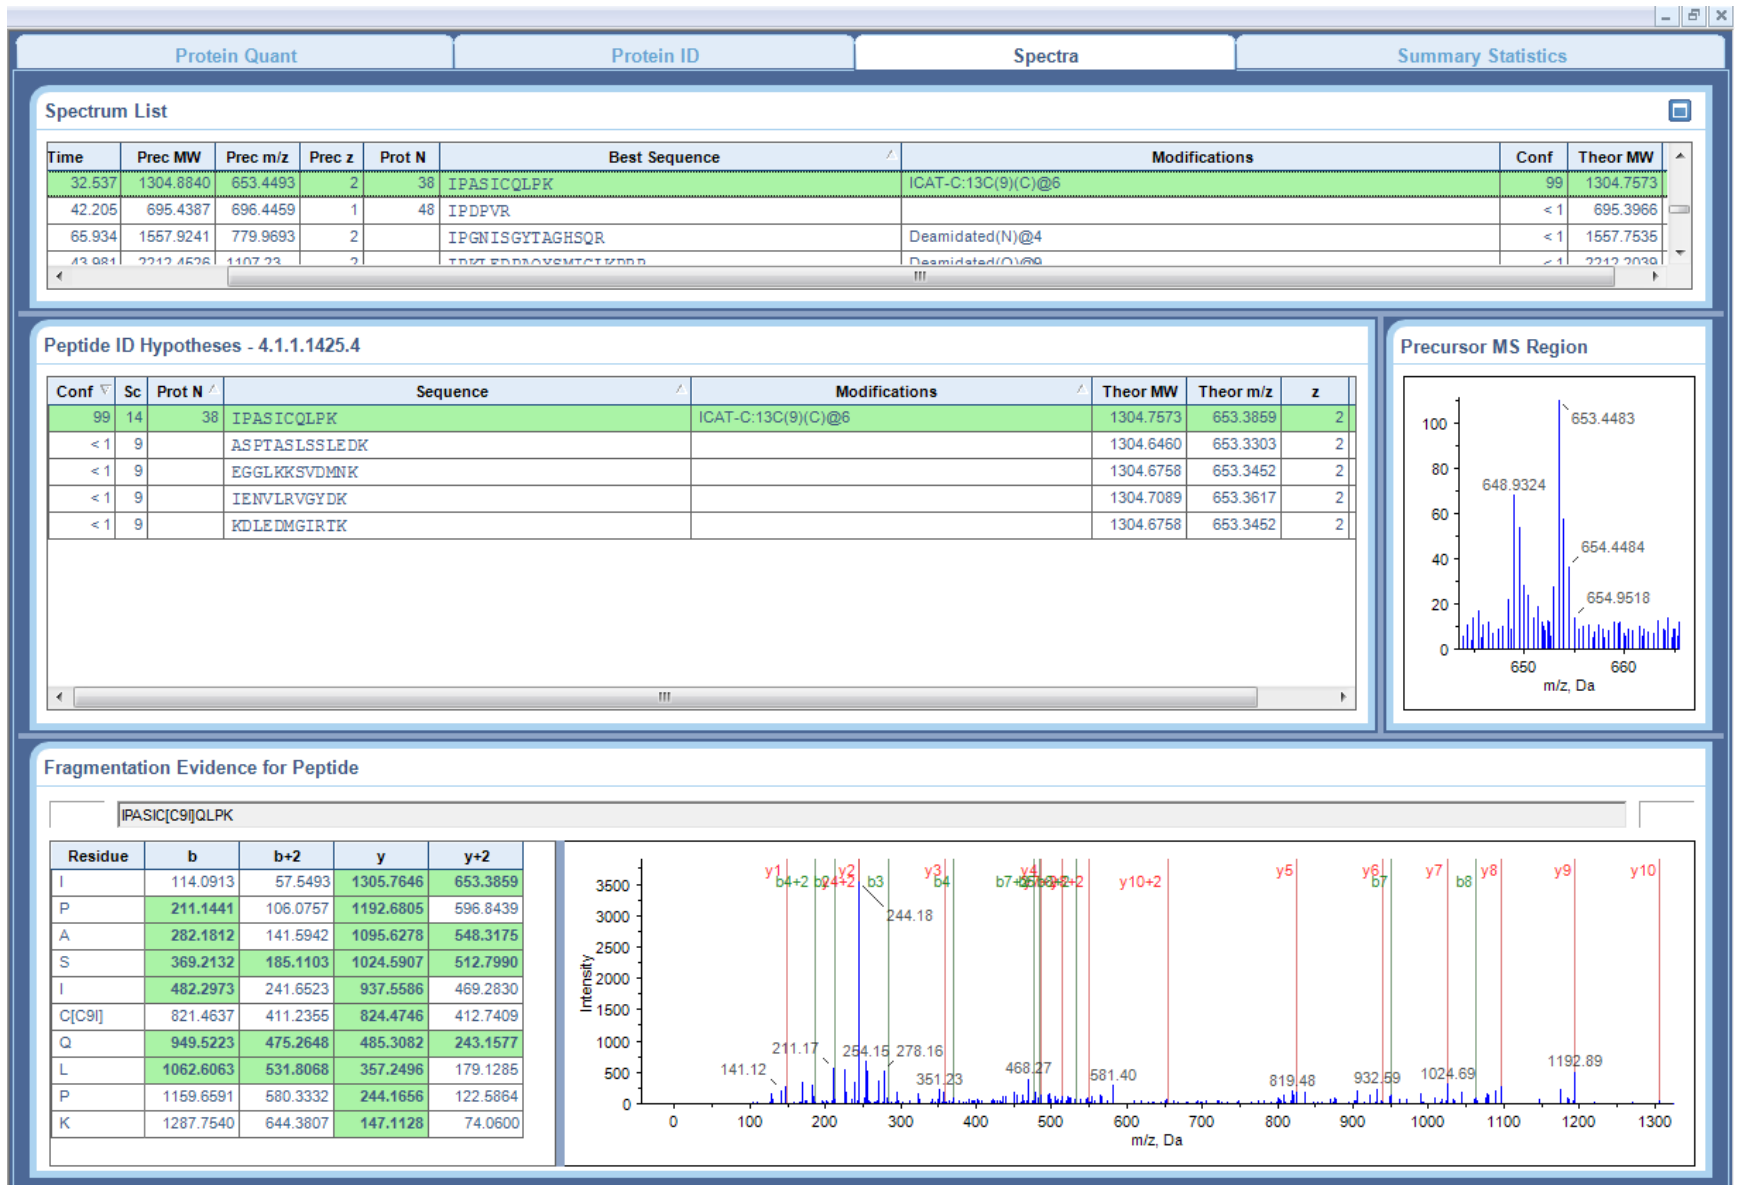



# Hypothetical protein MCCLFINDLDAGAGR

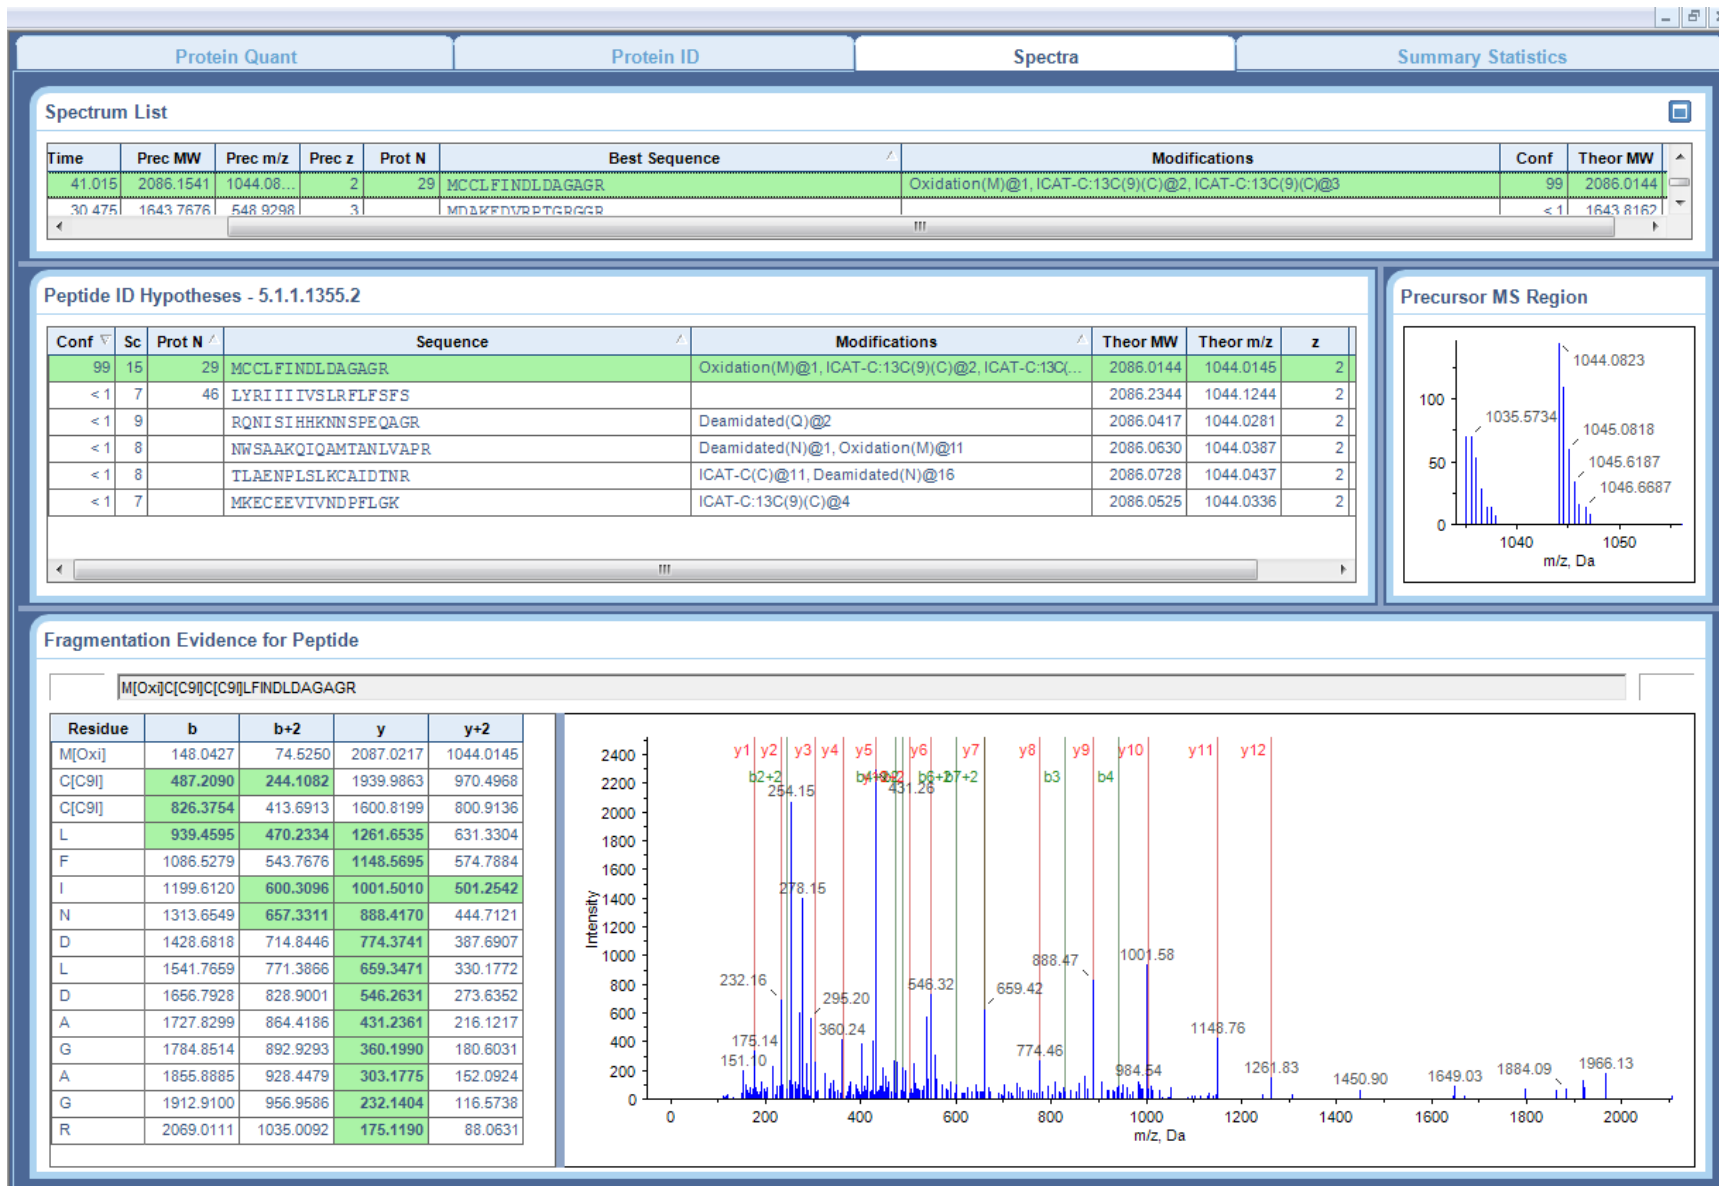

# Unknown protein LGACVDLLGGLVK

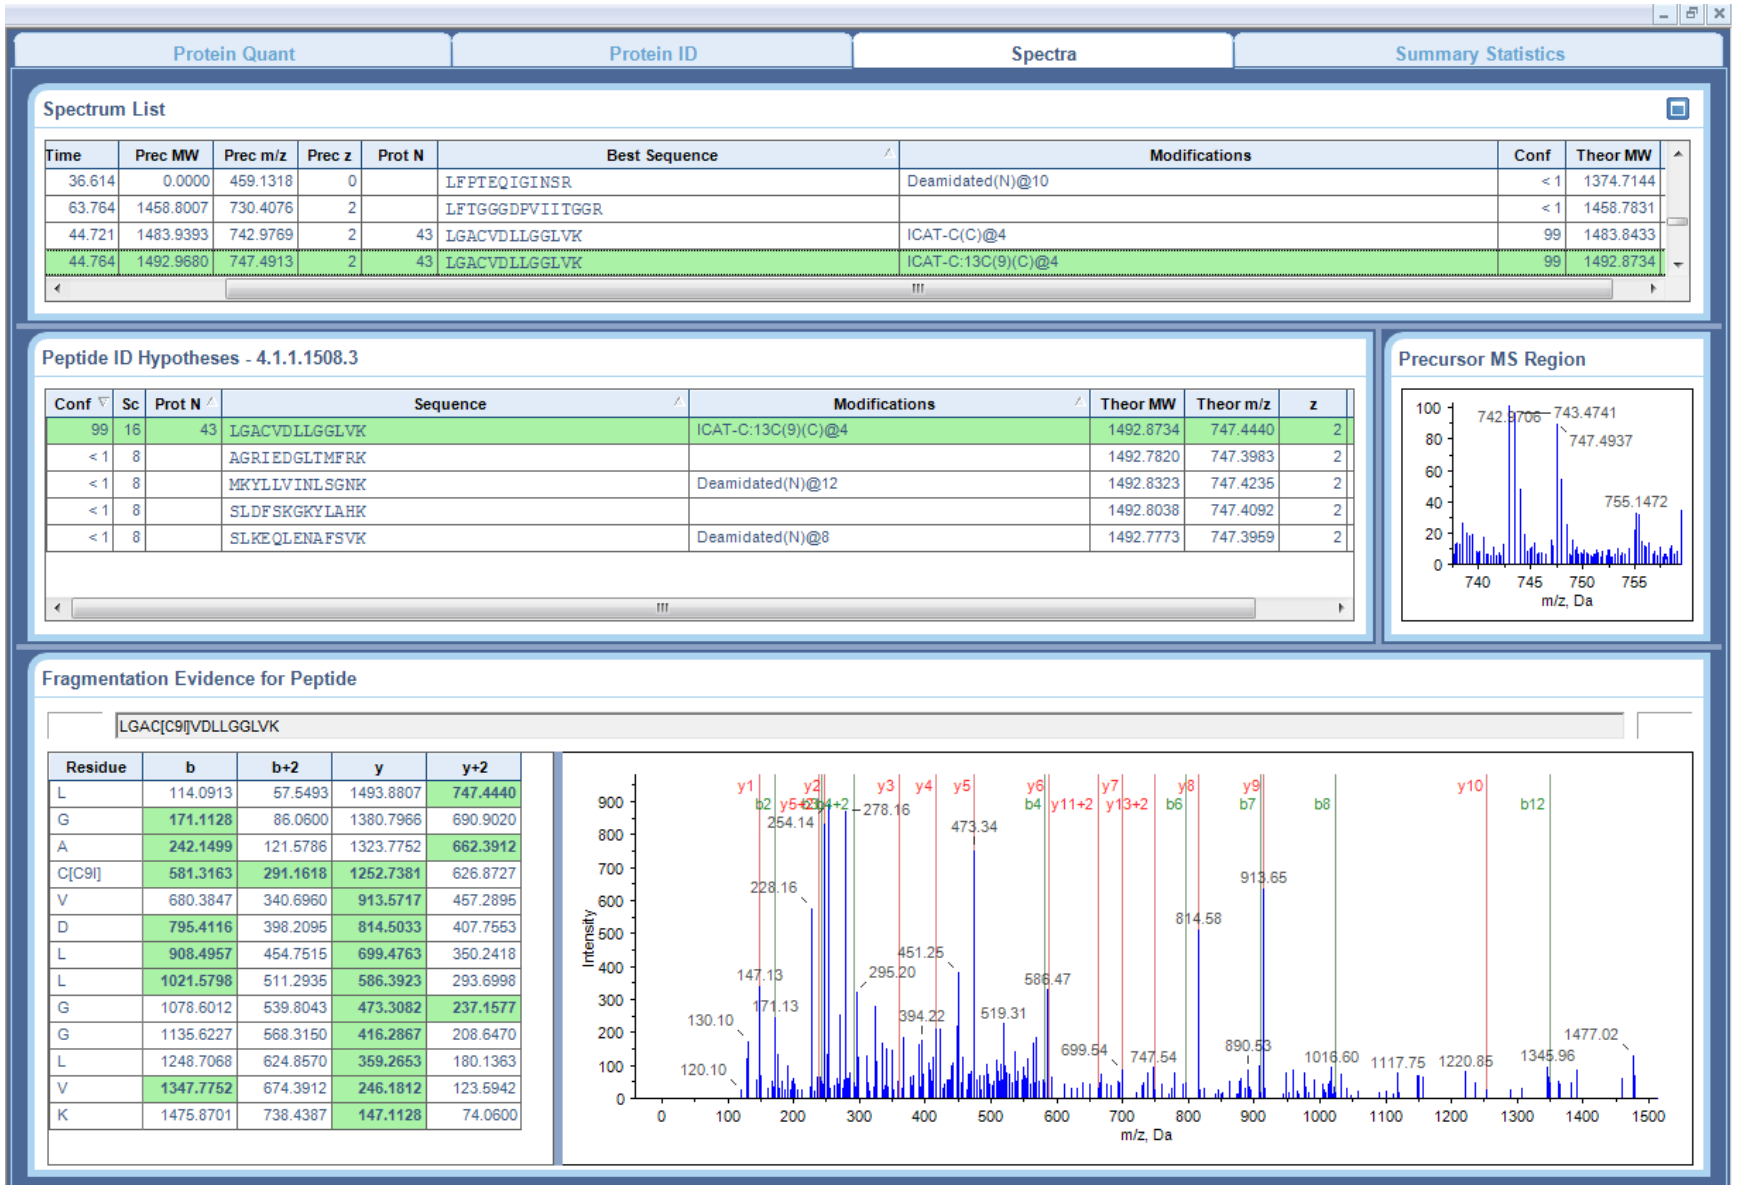

## Figure S4

This set of supplemental data contains the information of the coverage, peptides and MS/MS spectrum (if only one peptide identified for the protein) of each protein identified to be redox sensitive to ABA treatment in guard cells by redox DIGE.

# gi|109389998 Chloroplast chlorophyll a/b binding protein

## Protein View

Match to: gi|109389998 Score: 127

chloroplast chlorophyll a/b binding protein [Brassica napus]

Found in search of C:\Documents and Settings\schen\Desktop\MengMeng\wiff files\8\E3 2365.wiff

Nominal mass ( $M_r$ ): 28363; Calculated pI value: 5.48

NCBI BLAST search of [gi|109389998](#) against nr

Unformatted [sequence string](#) for pasting into other applications

Taxonomy: [Brassica napus](#)

Fixed modifications: Carbamidomethyl (C)

Variable modifications: Oxidation (M), Phospho (ST), CyDye-Cy3 (C), CyDye-Cy5 (C), Oxidation (C)

Cleavage by Trypsin: cuts C-term side of KR unless next residue is P

Sequence Coverage: 7%

Matched peptides shown in **Bold Red**

```
1  MAASTMALSS PAFAGKAVKL SPAASEVLGS GRVTMRKTVA KPKGPSGSPW
51 YGSERVKYLG PFSGEPPSYL TGEFPGDYGW DTAGLSADPE TFARNRELQV
101 IHCRWAMLGA LGCVFPELLA RGVKFGEAV WFKAGSQIFS EGGLDYLGNP
151 SLVHAQSILA IWATQVILMG AVEGYRVAGD GPLGEAEDLL YPGGSFDPLG
201 LATDPEAFAE LKVKEIKNGR LAMFSMFGFF AQAIVTGKGP LENLADHLAD
251 PVNNNAWAF A TNFVPGK
```

Show predicted peptides also

Sort Peptides By

Residue Number  Increasing Mass  Decreasing Mass

| Start - End      | Observed        | Mr(expt)         | Mr(calc)         | Delta          | Miss     | Sequence                                                  |
|------------------|-----------------|------------------|------------------|----------------|----------|-----------------------------------------------------------|
| <b>44 - 55</b>   | <b>640.2218</b> | <b>1278.4291</b> | <b>1278.5629</b> | <b>-0.1338</b> | <b>0</b> | <b>K.GPSGSPWYGSER.V</b> ( <a href="#">Ions score 73</a> ) |
| <b>126 - 133</b> | <b>492.2274</b> | <b>982.4402</b>  | <b>982.4913</b>  | <b>-0.0510</b> | <b>0</b> | <b>K.FGEAVWFK.A</b> ( <a href="#">Ions score 54</a> )     |

# gi|131285 Photosystem II 44 kDa reaction center protein

## Protein View

Match to: gi|131285 Score: 130

Photosystem II 44 kDa reaction center protein (P6 protein) (CP43)

Found in search of C:\Documents and Settings\schen\Desktop\MengMeng\14\D2 979.wiff

Nominal mass ( $M_r$ ): 52213; Calculated pI value: 6.71

NCBI BLAST search of [gi|131285](#) against nr

Unformatted [sequence string](#) for pasting into other applications

Taxonomy: [Secale cereale](#)

Links to retrieve other entries containing this sequence from NCBI Entrez:

[gi|12228](#) from [Secale cereale](#)

Fixed modifications: Carbamidomethyl (C)

Variable modifications: Oxidation (M), CyDye-Cy3 (C), CyDye-Cy5 (C), Oxidation (C)

Cleavage by Trypsin: cuts C-term side of KR unless next residue is P

Sequence Coverage: 8%

Matched peptides shown in **Bold Red**

```
1 MKILYSLRRF YHVETLFNGT FVLAGRDQET TGFAWWAGNA RLINLSGKLL
51 GAHVAHAGLI VFWAGAMNLF EVAHFVPEKP MYEQGLILLP HLATLGWGVG
101 PGGEVLDTFP YFVSGVLHLI SSAVLGFGGI YHALLGPETL EESFPFFGYV
151 WKDRNKMTTI LGIHLILLGL GAFLLVLKAL YFGGVYDTWA PGGGDVRKIT
201 NLTLSPSVIF GYLLKSPFVG EGWIVSVDDL EDIIGGHVWL GFICVFGGIW
251 HILTKPFAWA RRAFVWSGEA YLSYLAALS VFGFIACCFV WFNNTAYSSE
301 FYGPTGPEAS QAQAFNFLVR DQRLGANVGS AQQPTGLGKY LMRSPTEVI
351 FGGETMRFWD LRAPWLEPLR GPNGLDLRL KKDIQPWQER RSAEYMTHAP
401 LGSLNSVGGV ATEINAVNYV SPRSWLSTSH FVLGFFPFVGV HLWHAGRARA
451 AAAGFEKGID RDLEPVLYMN PLN
```

| Start - End | Observed | Mr (expt) | Mr (calc) | Delta  | Miss | Sequence                                                                    |
|-------------|----------|-----------|-----------|--------|------|-----------------------------------------------------------------------------|
| 324 - 339   | 713.9294 | 1425.8442 | 1425.7576 | 0.0866 | 0    | R.LGANVGS <b>AQQPTGLGK</b> .Y ( <a href="#">Ions score 53</a> )             |
| 344 - 357   | 748.8724 | 1495.7302 | 1495.6977 | 0.0325 | 0    | R.SPTGEV <b>IFGGETMR</b> .F Oxidation (M) ( <a href="#">Ions score 41</a> ) |
| 383 - 390   | 536.2895 | 1070.5644 | 1070.5145 | 0.0499 | 0    | K. <b>DIQPWQER</b> .R ( <a href="#">Ions score 36</a> )                     |

# gi|8745521 Ribulose biphosphate carboxylase large chain precursor

## Protein View

Match to: gi|1346967 Score: 220

Ribulose biphosphate carboxylase large chain precursor (RuBisCO large subunit)

Found in search of C:\Documents and Settings\schen\Desktop\MengMeng\14\D2 979.wiff

Nominal mass ( $M_r$ ): 53436; Calculated pI value: 5.88

NCBI BLAST search of [gi|1346967](#) against nr

Unformatted [sequence string](#) for pasting into other applications

Fixed modifications: Carbamidomethyl (C)

Variable modifications: Oxidation (M), CyDye-Cy3 (C), CyDye-Cy5 (C), Oxidation (C)

Cleavage by Trypsin: cuts C-term side of KR unless next residue is P

Sequence Coverage: 11%

Matched peptides shown in **Bold Red**

```
1 MSPQTETKAS VGFKAGVKEY KLNYTPEYE TKDTDILAAF RVTPQPGVPP
51 EEAGAAVAAE SSTGTWTTVW TDGLTSLDRY KGRCYHIEPV PGEETQFIAY
101 VAYPLDLFEE GSVTNMFTSI VGNVFGFKAL AALRLEDLRI PPAYTKTFQG
151 PPHGIQVERD KLNKYGRPLL GCTIKPKLGL SAKNYGRAVY ECLRGGLDFT
201 KDDENVNSQP FMRWRDRFLF CAEAIYKSA ETGEIKGHYL NATAGTCEEM
251 MKRAIFAREL GVPIVMHDYL TGGFTANTSL AHYCRDNGLL LHIHRAMHAV
301 IDRQKNHGMH FRVLAKALRL SGGDHVHAGT VVGKLEGDRE STLGFVDLLR
351 DDYVEKDRSR GIFFTQDWVS LPGVLPVASG GIHVWHMPAL TEIFGDDSVL
401 QFGGGTLGHP WGNAPGAVAN RVALEACVQA RNEGRDLAVE GNEIIREACK
451 WSPELAAACE VWKEITFNFV TIDKLDGQD
```

| Start - End | Observed | Mr(expt)  | Mr(calc)  | Delta   | Miss | Sequence                                                                |
|-------------|----------|-----------|-----------|---------|------|-------------------------------------------------------------------------|
| 22 - 32     | 710.8177 | 1419.6208 | 1419.6558 | -0.0350 | 0    | K.LNYYTPEYETK.D ( <a href="#">Ions score 50</a> )                       |
| 195 - 213   | 729.3461 | 2185.0165 | 2184.9746 | 0.0419  | 1    | R.GGLDFTKDDENVNSQPFMR.W Oxidation (M) ( <a href="#">Ions score 51</a> ) |
| 320 - 334   | 717.3900 | 1432.7654 | 1432.7423 | 0.0231  | 0    | R.LSGGDHVHAGTVVGK.L ( <a href="#">Ions score 55</a> )                   |
| 320 - 334   | 478.7023 | 1433.0850 | 1432.7423 | 0.3427  | 0    | R.LSGGDHVHAGTVVGK.L ( <a href="#">Ions score 34</a> )                   |
| 436 - 446   | 614.8159 | 1227.6173 | 1227.6459 | -0.0286 | 0    | R.DLAVEGNEIIR.E ( <a href="#">Ions score 64</a> )                       |

# gi|17855 Rubisco small subunit precursor

## Protein View

Match to: gi|17855 Score: 181

rubisco ssu precursor [Brassica napus]

Found in search of C:\Documents and Settings\schen\Desktop\MengMeng\14\D2 979.wiff

Nominal mass ( $M_r$ ): 20529; Calculated pI value: 7.63

NCBI BLAST search of [gi|17855](#) against nr

Unformatted [sequence string](#) for pasting into other applications

Taxonomy: [Brassica napus](#)

Fixed modifications: Carbamidomethyl (C)

Variable modifications: Oxidation (M), CyDye-Cy3 (C), CyDye-Cy5 (C), Oxidation (C)

Cleavage by Trypsin: cuts C-term side of KR unless next residue is P

Sequence Coverage: 23%

Matched peptides shown in **Bold Red**

```
1 MAYSMLSSAA VVTSPAQATM VAPFTGLKSS SAFPVTRKAN NDITSIVSNG
51 GRVNSMQVWP PVGKKKFETL SYLPDLTEVE LGKEVDYLLR NKWIPCVEFE
101 LEHGFVYREH GSTPGYYDGR YWTMWKLPLF GCTDSAQVLK EVQECKTEYP
151 NAFIRIIGFD NNRQVQCISF IAYKPPSFTG A
```

| Start - End | Observed | Mr (expt) | Mr (calc) | Delta   | Miss | Sequence                                                          |
|-------------|----------|-----------|-----------|---------|------|-------------------------------------------------------------------|
| 84 - 90     | 454.2176 | 906.4206  | 906.4811  | -0.0604 | 0    | <b>K.EVDYLLR.N</b> ( <a href="#">Ions score 34</a> )              |
| 109 - 120   | 669.8454 | 1337.6763 | 1337.5636 | 0.1127  | 0    | <b>R.EHGSTPGYYDGR.Y</b> ( <a href="#">Ions score 53</a> )         |
| 121 - 126   | 465.7598 | 929.5050  | 929.4106  | 0.0944  | 0    | <b>R.YWTMWK.L</b> Oxidation (M) ( <a href="#">Ions score 13</a> ) |
| 147 - 155   | 555.8241 | 1109.6336 | 1109.5505 | 0.0831  | 0    | <b>K.TEYPNAFIR.I</b> ( <a href="#">Ions score 41</a> )            |
| 156 - 163   | 474.7656 | 947.5166  | 947.4825  | 0.0341  | 0    | <b>R.IIGFDNNR.Q</b> ( <a href="#">Ions score 40</a> )             |

# gi|21839 Phosphoribulokinase; ribulose-5-phosphate kinase

## Protein View

Match to: gi|21839 Score: 135

phosphoribulokinase; ribulose-5-phosphate kinase [Triticum aestivum]

Found in search of C:\Documents and Settings\schen\Desktop\MengMeng\500ug Prep gel Plate 2\B1 1546.wiff

Nominal mass ( $M_r$ ): 45406; Calculated pI value: 5.84

NCBI BLAST search of [gi|21839](#) against nr

Unformatted [sequence string](#) for pasting into other applications

Taxonomy: [Triticum aestivum](#)

Fixed modifications: Carbamidomethyl (C)

Variable modifications: Oxidation (M), CyDye-Cy3 (C), CyDye-Cy5 (C), Oxidation (C)

Cleavage by Trypsin: cuts C-term side of KR unless next residue is P

Sequence Coverage: 5%

Matched peptides shown in **Bold Red**

```
1 MAFCSPHSTT SLRSPCTTIP NSGFRQNQVI LFTTRSSRRS NTRHGARTFQ
51 VSCAVEQPIV IGLAADSGCG KSTFMRRLTS VFGGAAEPPK GGNPDSNTLI
101 SDTTTVICLD DYHSLDRTGR KEKGVTDALDP KANDFDLMEY QVKAIKEGKA
151 IEKPIYNHVT GLLDPAELIQ PPKIFVIEGL HPMYDERVRE LLDFSIYLDI
201 SNEVKFAWKI QRDMAERGHG LESIKASIEA RKPFDFAFIG PQQYADAVI
251 EVLPTQLIPD DNEGKVLRVK LIMKEGIKFF NPVYLFDEGS TINWIPCGRK
301 LTCSTYPIKF SYGPDYFQG EVSVLEMDGQ FDRLELIYV ESHLSNLSTK
351 FYGEVTQQML KHADFPGSNN GTGLFQTIYV LKIRDLYEQI IAERAGVPAE
401 AAKV
```

Show predicted peptides also

Sort Peptides By

Residue Number  Increasing Mass  Decreasing Mass

| Start - End | Observed | Mr (expt) | Mr (calc) | Delta   | Miss | Sequence                                                               |
|-------------|----------|-----------|-----------|---------|------|------------------------------------------------------------------------|
| 78 - 90     | 637.3328 | 1272.6511 | 1272.6714 | -0.0203 | 0    | <b>R.LTSVFGGAAEPPK.G</b> ( <a href="#">Ions score 71</a> )             |
| 351 - 361   | 680.8327 | 1359.6508 | 1358.6540 | 0.9967  | 0    | <b>K.FYGEVTQQMLK.H</b> Oxidation (M) ( <a href="#">Ions score 64</a> ) |



# gi|114420 ATP synthase subunit beta, mitochondrial precursor

## Protein View

Match to: gi|114420 Score: 139

ATP synthase subunit beta, mitochondrial precursor

Found in search of C:\Documents and Settings\schen\Desktop\MengMeng\0226 PLATE1 10SAMPLES\F4 1223.wiff

Nominal mass (M<sub>r</sub>): 59181; Calculated pI value: 6.01

NCBI BLAST search of [gi|114420](#) against nr

Unformatted [sequence string](#) for pasting into other applications

Taxonomy: [Zea mays](#)

Links to retrieve other entries containing this sequence from NCBI Entrez:

[gi|22173](#) from [Zea mays](#)

[gi|897618](#) from [Zea mays](#)

Fixed modifications: Carbamidomethyl (C)

Variable modifications: Oxidation (M), CyDye-Cy3 (C), CyDye-Cy5 (C), Oxidation (C)

Cleavage by Trypsin: cuts C-term side of KR unless next residue is P

Sequence Coverage: 5\*

Matched peptides shown in **Bold Red**

```
1 MASRRVSSSL LRSASRLRAA SPAAPRRPRAP PHRPSPAGYL FNRAAYASS
51 AAAQAAPATP PPATGKTGGG KITDEFTGAG AIGQVCQVIG AVVDVREDEG
101 LPPILTALEV LDNNIRLVLE VAQHLGENMV RTIAMDGTEG LVAGQVLNT
151 GSPITVPVGR ATLGRIINVI GEPIDKGD I KTNHFLPIHR EAPAFVEQAT
201 EQQILVTGIK WOLLAPYQR GKKIGLFGGA GVGKTVLIME LINNVAKAHG
251 GPSVPAGVGE RTREGNDLYR EMIESGVIKL DDKQSESKCA LUYGQMEPP
301 GARARVGLTG LTVAEHFRDA EGQDVLLPID NIFRPTQANS EVSALLGRIP
351 SAVGYQPTLA TDLGGLQERI TTRKGSITS VQAIYVPADD LTDPA PATTF
401 AHLDAITVLS RQISELGIYP AVDPLDTSR MLSPHVLGED HYNTRAGVQK
451 VLQNYHMLQD IIAILGMDEL SEDDKLTVAR ARKIQRFLSQ PFHVAEVFTG
501 APGKYVELKE SVKSPQGVLD GKYDDLPEQS FYMVGGEIEV IAKAEKIAKE
551 SAS
```

Show predicted peptides also

Sort Peptides By

Residue Number  Increasing Mass  Decreasing Mass

| Start - End | Observed | Mr(expt)  | Mr(calc)  | Delta  | Miss | Sequence                                                         |
|-------------|----------|-----------|-----------|--------|------|------------------------------------------------------------------|
| 132 - 143   | 639.8490 | 1277.6834 | 1277.6286 | 0.0549 | 0    | R.TIAMDGTEGLVR.G Oxidation (M) ( <a href="#">Ions score 67</a> ) |
| 211 - 220   | 587.3486 | 1172.6827 | 1172.6553 | 0.0274 | 0    | K.WOLLAPYQR.G ( <a href="#">Ions score 37</a> )                  |
| 224 - 234   | 488.3454 | 974.6762  | 974.5549  | 0.1213 | 0    | K.IGLFGGAGVGR.T ( <a href="#">Ions score 36</a> )                |

# gi|15219234 Vacuolar ATP synthase subunit A (VHA-A)

Match to: gi|15219234 Score: 368

VHA-A: ATP binding / hydrogen ion transporting ATP synthase, rotational mechanism [Arabidopsis thaliana]

Found in search of C:\Documents and Settings\schen\Desktop\MengMeng\FEB22 500UG PREP PLATE1\B9 703.wiff

Nominal mass ( $M_r$ ): 69111; Calculated pI value: 5.11

NCBI BLAST search of [gi|15219234](#) against nr

Unformatted [sequence string](#) for pasting into other applications

Taxonomy: [Arabidopsis thaliana](#)

Links to retrieve other entries containing this sequence from NCBI Entrez:

[gi|79321468](#) from [Arabidopsis thaliana](#)

[gi|3334404](#) from [Arabidopsis thaliana](#)

[gi|2266990](#) from [Arabidopsis thaliana](#)

[gi|3834305](#) from [Arabidopsis thaliana](#)

[gi|16649079](#) from [Arabidopsis thaliana](#)

[gi|19698899](#) from [Arabidopsis thaliana](#)

[gi|21553884](#) from [Arabidopsis thaliana](#)

[gi|27311967](#) from [Arabidopsis thaliana](#)

[gi|30725440](#) from [Arabidopsis thaliana](#)

[gi|110740311](#) from [Arabidopsis thaliana](#)

Fixed modifications: Carbamidomethyl (C)

Variable modifications: Oxidation (M), CyDye-Cy3 (C), CyDye-Cy5 (C), Oxidation (C)

Cleavage by Trypsin: cuts C-term side of KR unless next residue is P

Sequence Coverage: 12%

Matched peptides shown in **Bold Red**

```
1 MPAFYGGKLT TFEDDEKESK YGYVRKVSGP VVVADGMAGA AMYELVRVGH
51 DNLIIGEIIRL EGDSATIQVY EETAGLTVND PVLRTHKPLS VELGPGILGN
101 IFDGIQRPLK TIARISGDVY IPRGVSVPAL DKDCLWEFQP NKFVEGDTIT
151 GGDLYATVFE NTLMNHLVAL PPDAMGKITY IAPAGQYSLK DTVIELEFQG
201 IKKSYTMLQS WPVRTPRPVA SKLAADTPLL TGQRVLDALF PSVLGGTCAI
251 PGAFGCGKTV ISQALSKYSN SDAVVYVCGG ERGNEMAEVL MDFPQLTMTL
301 PDGREESVMK RTTLVANTSN MPVAAREASI YTGITIAEYF RDMGYNVSM
351 ADSTSRWAEA LREISGRLEA MPADSGYPAY LAARLASFYE RAGKVKCLGG
401 PERNGSVTIV GAVSPGGDF SDPVTSATLS IVQVFWGLDK KLAQRKHFPS
451 VNWLSISYSKY STALESFYEK FDPDFINIRT KAREVLQRED DLNEIVQLVG
501 KDALAEGDKI TLETAKLLRE DYLAQNAFTP YDKFCPFYKS VWMRNIIHF
551 YNLANQAVER AAGMDGQKIT YTLIKHRLGD LFYRLVSQKF EDPAEGEDTL
601 VEKFKKLYDD LNAQFRALED ETR
```

| Start - End | Observed | Mr (expt) | Mr (calc) | Delta   | Miss | Sequence                                                                            |
|-------------|----------|-----------|-----------|---------|------|-------------------------------------------------------------------------------------|
| 26 - 47     | 751.6538 | 2251.9397 | 2251.1341 | 0.8056  | 1    | <b>R.KVSGPVVVADGMAGAAMYELVR.V</b> 2 Oxidation (M) ( <a href="#">Ions score 44</a> ) |
| 204 - 214   | 692.3292 | 1382.6439 | 1382.6653 | -0.0213 | 0    | <b>K.SYTMLQSWPVR.T</b> Oxidation (M) ( <a href="#">Ions score 49</a> )              |
| 223 - 234   | 628.3441 | 1254.6737 | 1254.6932 | -0.0195 | 0    | <b>K.LAADTPLLTGQR.V</b> ( <a href="#">Ions score 90</a> )                           |
| 259 - 267   | 473.8013 | 945.5881  | 945.5495  | 0.0386  | 0    | <b>K.TVISQALS</b> K.Y ( <a href="#">Ions score 63</a> )                             |
| 385 - 391   | 443.2615 | 884.5085  | 884.4392  | 0.0693  | 0    | <b>R.LASFYER.A</b> ( <a href="#">Ions score 43</a> )                                |
| 569 - 575   | 426.3156 | 850.6166  | 850.5164  | 0.1002  | 0    | <b>K.ITYTLIK.H</b> ( <a href="#">Ions score 34</a> )                                |
| 578 - 584   | 442.2734 | 882.5323  | 882.4599  | 0.0723  | 0    | <b>R.LGDLFYR.L</b> ( <a href="#">Ions score 47</a> )                                |

# gi|56384657 F1-ATPase alpha subunit

## Protein View

Match to: gi|56384657 Score: 220

F1-ATPase alpha subunit [Brassica juncea]

Found in search of C:\Documents and Settings\schen\Desktop\MengMeng\FEB22 500UG PREP PLATE1\E2 1107.wiff

Nominal mass ( $M_r$ ): 46684; Calculated pI value: 5.64

NCBI BLAST search of [gi|56384657](#) against nr

Unformatted [sequence string](#) for pasting into other applications

Taxonomy: [Brassica juncea](#)

Fixed modifications: Carbamidomethyl (C)

Variable modifications: Oxidation (M), CyDye-Cy3 (C), CyDye-Cy5 (C), Oxidation (C)

Cleavage by Trypsin: cuts C-term side of KR unless next residue is P

Sequence Coverage: 10%

Matched peptides shown in **Bold Red**

```
1 MELSPRAAEL TNLFESRIRN FYANFQVDEI GRVSVSGDGI AQVYGLNEIQ
51 AGEMVLFANG VKGMALNLEN ENVGIVVFGG DTAIKEGDLV KRTGSIVDVP
101 AGKAMLGRVV DAMGVPIDGR GALSDHEQRR VEVKAPGILE RKSVPHEPMQT
151 GLKAVDSLVP IGRGQRELLI GDRQTGKTTI AIDTILNQKQ INSRATSESE
201 TMYCVYVAIG QKRSTVGQLI QTLEEANALE YSILVAATAS DPAPLQFLAP
251 YSGCAMGEYF RDNGMHALII YDDLKQAVA YRQMSLLLR PPGREASPGD
301 VFYLHSRLLE RAAKRSQTG AGSLTALPVI ETQAGDVSAY IPTNVISITD
351 GQICLETELF YRGIRPAINV GLSVSRVGSA AQLKAMKQVC GSSKLELAQY
401 REVAFAQFG SDDLALYEKR YVLSLKSEF
```

Show predicted peptides also

Sort Peptides By

Residue Number  Increasing Mass  Decreasing Mass

| Start - End | Observed | Mr (expt) | Mr (calc) | Delta   | Miss | Sequence                                                                 |
|-------------|----------|-----------|-----------|---------|------|--------------------------------------------------------------------------|
| 7 - 17      | 625.8285 | 1249.6425 | 1249.6302 | 0.0123  | 0    | <b>R.AAELTNLFESR</b> .I ( <a href="#">Ions score 82</a> )                |
| 109 - 120   | 622.7948 | 1243.5750 | 1243.6231 | -0.0481 | 0    | <b>R.VVDAMGVPIDGR</b> .G Oxidation (M) ( <a href="#">Ions score 56</a> ) |
| 154 - 163   | 513.7832 | 1025.5519 | 1025.5869 | -0.0351 | 0    | <b>K.AVDSLVP</b> IGR.G ( <a href="#">Ions score 48</a> )                 |
| 363 - 376   | 480.3057 | 1437.8952 | 1437.8416 | 0.0537  | 0    | <b>R.GIRPAINVGLSVSR</b> .V ( <a href="#">Ions score 36</a> )             |

# gi|5708095 ATP synthase gamma chain, chloroplast precursor

## Protein View

Match to: gi|5708095 Score: 112

ATP synthase gamma chain, chloroplast precursor [Arabidopsis thaliana]

Found in search of C:\Documents and Settings\schen\Desktop\MengMeng\500ug Prep gel Plate 2\1734.wiff

Nominal mass ( $M_r$ ): 33475; Calculated pI value: 6.12

NCBI BLAST search of [gi|5708095](#) against nr

Unformatted [sequence string](#) for pasting into other applications

Taxonomy: [Arabidopsis thaliana](#)

Fixed modifications: Carbamidomethyl (C)

Variable modifications: Oxidation (M), CyDye-Cy3 (C), CyDye-Cy5 (C), Oxidation (C)

Cleavage by Trypsin: cuts C-term side of KR unless next residue is P

Sequence Coverage: 6%

Matched peptides shown in **Bold Red**

```
1  RMKLVAAAKV  RRAQEAVVNG  RPFSETLVEV  LYNINEQLQT  DDVDVPLTKV
51  RPVKKVALVW  VTGDRGLCGG  FNNFIIKKA  ARIKELKGLG  LEYTVISVGK
101 KGN SYFLRRP  YIPVDKYLEA  GTLPTAKEAQ  AVADDVFSLF  ISEEVDKVEL
151 LYTKFVSLVK  SEPVIHTLLP  LSPKGEICDI  NGTCVDAAED  EFFRLTTKEG
201 KLTVERETFR  TPTADFSPIL  LFEQDPVQIL  DALLPLYLNS  QILRALQESL
251 ASELAAARMSA  MSSASDNASD  LKKSLSMVYN  RKRQAKITGE  ILEIVAGANA
301  QV
```

Show predicted peptides also

Sort Peptides By

Residue Number  Increasing Mass  Decreasing Mass

| Start - End | Observed | Mr (expt) | Mr (calc) | Delta   | Miss | Sequence        |                                   |
|-------------|----------|-----------|-----------|---------|------|-----------------|-----------------------------------|
| 56 - 65     | 514.8060 | 1027.5974 | 1027.6026 | -0.0052 | 0    | K.VALLVVVTGDR.G | ( <a href="#">Ions score 63</a> ) |
| 117 - 127   | 582.2861 | 1162.5576 | 1162.6234 | -0.0657 | 0    | K.YLEAGTLPTAK.E | ( <a href="#">Ions score 49</a> ) |

# gi|126896 Malate dehydrogenase, mitochondrial precursor

## Protein View

Match to: gi|126896 Score: 66

Malate dehydrogenase, mitochondrial precursor

Found in search of C:\Documents and Settings\schen\Desktop\MengMeng\500ug Prep gel Plate 2\G8 1975.wiff

Nominal mass ( $M_r$ ): 36406; Calculated pI value: 8.88

NCBI BLAST search of [gi|126896](#) against nr

Unformatted [sequence string](#) for pasting into other applications

Taxonomy: [Citrullus lanatus](#)

Links to retrieve other entries containing this sequence from NCBI Entrez:

[gi|18297](#) from [Citrullus lanatus var. lanatus](#)

Fixed modifications: Carbamidomethyl (C)

Variable modifications: Oxidation (M), CyDye-Cy3 (C), CyDye-Cy5 (C), Oxidation (C)

Cleavage by Trypsin: cuts C-term side of KR unless next residue is P

Sequence Coverage: 3%

Matched peptides shown in **Bold Red**

```
1 MKASILRSVR SAVSRSSSSN RLLSRSFATE SVPERKVAVL GAAGGIGQPL
51 ALLMKLNPLV SKLALYDIAG TPGVAADVGH VNTRSEVTGY VGEEQLGKAL
101 EGSDVVIIPA GVPRKPGMTR DDLFNINAGI VKSLCTAIAK YCPNALINMI
151 SNPVNSTVPI AAEVFKKAGT YDEKKLFGVT TLDVVRAKTF YAGKANVPVA
201 EVNVPVIGGH AGITILPLFS QATPRANLSD DTIVALTKRT QDGGTEVVEA
251 KAGKGSATLS MAYAGALFAD ACLKGLNGVP DVVECSFVQS TVTELPPFFAS
301 KVKLGKNGVE SVLDLGPLSD FEKEGLEKLG PELKASIEKG IQFANAN
```

Show predicted peptides also

Sort Peptides By

Residue Number  Increasing Mass  Decreasing Mass

| Start - End | Observed | Mr(expt)  | Mr(calc)  | Delta  | Miss | Sequence                               |
|-------------|----------|-----------|-----------|--------|------|----------------------------------------|
| 176 - 186   | 610.3730 | 1218.7314 | 1218.6972 | 0.0341 | 0    | <b>K.LFGVTTLDVVR.A</b> (Ions score 66) |

MS/MS Fragmentation of **LFGVTTLDVVR**

Found in **gi|126896**, Malate dehydrogenase, mitochondrial precursor

| #         | b               | b <sup>++</sup> | b <sup>0</sup>  | b <sup>0++</sup> | Seq.     | y                | y <sup>++</sup> | y <sup>*</sup> | y <sup>*++</sup> | y <sup>0</sup>  | y <sup>0++</sup> | #         |
|-----------|-----------------|-----------------|-----------------|------------------|----------|------------------|-----------------|----------------|------------------|-----------------|------------------|-----------|
| <b>1</b>  | 114.0913        | 57.5493         |                 |                  | <b>L</b> |                  |                 |                |                  |                 |                  | <b>11</b> |
| <b>2</b>  | <b>261.1598</b> | 131.0835        |                 |                  | <b>F</b> | <b>1106.6204</b> | 553.8139        | 1089.5939      | 545.3006         | 1088.6099       | 544.8086         | <b>10</b> |
| <b>3</b>  | <b>318.1812</b> | 159.5942        |                 |                  | <b>G</b> | <b>959.5520</b>  | 480.2796        | 942.5255       | 471.7664         | <b>941.5415</b> | 471.2744         | <b>9</b>  |
| <b>4</b>  | 417.2496        | 209.1285        |                 |                  | <b>V</b> | <b>902.5306</b>  | <b>451.7689</b> | 885.5040       | 443.2556         | 884.5200        | 442.7636         | <b>8</b>  |
| <b>5</b>  | 518.2973        | 259.6523        | 500.2867        | 250.6470         | <b>T</b> | <b>803.4621</b>  | 402.2347        | 786.4356       | <b>393.7214</b>  | <b>785.4516</b> | <b>393.2294</b>  | <b>7</b>  |
| <b>6</b>  | 619.3450        | 310.1761        | <b>601.3344</b> | 301.1709         | <b>T</b> | <b>702.4145</b>  | <b>351.7109</b> | 685.3879       | 343.1976         | 684.4039        | 342.7056         | <b>6</b>  |
| <b>7</b>  | 732.4291        | 366.7182        | 714.4185        | 357.7129         | <b>L</b> | <b>601.3668</b>  | 301.1870        | 584.3402       | 292.6738         | 583.3562        | 292.1817         | <b>5</b>  |
| <b>8</b>  | 847.4560        | 424.2316        | 829.4454        | 415.2264         | <b>D</b> | <b>488.2827</b>  | 244.6450        | 471.2562       | 236.1317         | 470.2722        | 235.6397         | <b>4</b>  |
| <b>9</b>  | 946.5244        | 473.7658        | 928.5138        | 464.7606         | <b>V</b> | <b>373.2558</b>  | 187.1315        | 356.2292       | 178.6183         |                 |                  | <b>3</b>  |
| <b>10</b> | 1045.5928       | 523.3001        | 1027.5823       | 514.2948         | <b>V</b> | 274.1874         | 137.5973        | 257.1608       | <b>129.0840</b>  |                 |                  | <b>2</b>  |
| <b>11</b> |                 |                 |                 |                  | <b>R</b> | <b>175.1190</b>  | 88.0631         | 158.0924       | 79.5498          |                 |                  | <b>1</b>  |

# gi|15231715 Fructose-bisphosphate aldolase, putative

## Protein View

Match to: gi|15231715 Score: 238

fructose-bisphosphate aldolase, putative [Arabidopsis thaliana]

Found in search of C:\Documents and Settings\schen\Desktop\MengMeng\500ug Prep gel Plate 2\B2 1550.wiff

Nominal mass ( $M_r$ ): 38858; Calculated pI value: 6.05

NCBI BLAST search of [gi|15231715](#) against nr

Unformatted [sequence string](#) for pasting into other applications

Taxonomy: [Arabidopsis thaliana](#)

Links to retrieve other entries containing this sequence from NCBI Entrez:

[gi|7529717](#) from [Arabidopsis thaliana](#)

[gi|15450683](#) from [Arabidopsis thaliana](#)

[gi|16323105](#) from [Arabidopsis thaliana](#)

[gi|17380610](#) from [Arabidopsis thaliana](#)

[gi|21592946](#) from [Arabidopsis thaliana](#)

Fixed modifications: Carbamidomethyl (C)

Variable modifications: Oxidation (M), CyDye-Cy3 (C), CyDye-Cy5 (C), Oxidation (C)

Cleavage by Trypsin: cuts C-term side of KR unless next residue is P

Sequence Coverage: 13%

Matched peptides shown in **Bold Red**

```
1  MSAFTSKFAD ELIANAAYIG TPGKGILAAD ESTGTIGKRL ASINVENVET
51 NRRNLRLELF TAPGALPCLS GVILFEETLY QKSSDGKLFV DILKEGGVLP
101 GIKVDKGTVE LAGTDGETTT QGLDGLGDRG KKYEEAGARF AKWRAVLKIG
151 ENEPSEHSIH ENAYGLARYA VICQENGLVP IVEPEILVDG SHDIQKCAAV
201 TERVLAACYK ALSDHHVLE GTLLKPNMVT PGSDSPKVSP EVIAHTVRA
251 LQRTVPAAVP AIVFLSGGQS EEEATRNLNA MNQLKTKKPW SLSFSFGRAL
301 QQSTLKTWAG KEENVKAAQE ALYVRCKANS EATLGTYKGD AKLGDGAAES
351 LHVKDYKY
```

| Start - End | Observed | Mr (expt) | Mr (calc) | Delta   | Miss | Sequence                                                             |
|-------------|----------|-----------|-----------|---------|------|----------------------------------------------------------------------|
| 25 - 38     | 666.7997 | 1331.5848 | 1331.6933 | -0.1084 | 0    | <b>K.GILAADESTGTIGK.R</b> ( <a href="#">Ions score 69</a> )          |
| 88 - 94     | 424.2744 | 846.5343  | 846.5215  | 0.0128  | 0    | <b>K.LFVDILK.E</b> ( <a href="#">Ions score 34</a> )                 |
| 277 - 285   | 531.2674 | 1060.5202 | 1060.5335 | -0.0133 | 0    | <b>R.NLNAMNQLK.T</b> Oxidation (M) ( <a href="#">Ions score 34</a> ) |
| 317 - 325   | 511.2316 | 1020.4487 | 1019.5400 | 0.9087  | 0    | <b>K.AAQEALYVR.C</b> ( <a href="#">Ions score 51</a> )               |
| 328 - 338   | 577.7809 | 1153.5472 | 1153.5615 | -0.0143 | 0    | <b>K.ANSEATLGTYK.G</b> ( <a href="#">Ions score 52</a> )             |

# gi|15219721 Malate dehydrogenase, cytosolic, putative

## Protein View

Match to: gi|15219721 Score: 246

malate dehydrogenase, cytosolic, putative [Arabidopsis thaliana]

Found in search of C:\Documents and Settings\schen\Desktop\MengMeng\500ug Prep gel Plate 2\E4 1795.wiff

Nominal mass ( $M_r$ ): 35890; Calculated pI value: 6.11

NCBI BLAST search of [gi|15219721](#) against nr

Unformatted [sequence string](#) for pasting into other applications

Taxonomy: [Arabidopsis thaliana](#)

Links to retrieve other entries containing this sequence from NCBI Entrez:

[gi|11133509](#) from [Arabidopsis thaliana](#)

[gi|2341034](#) from [Arabidopsis thaliana](#)

[gi|15215692](#) from [Arabidopsis thaliana](#)

[gi|17473717](#) from [Arabidopsis thaliana](#)

[gi|20148469](#) from [Arabidopsis thaliana](#)

[gi|21593602](#) from [Arabidopsis thaliana](#)

[gi|22137280](#) from [Arabidopsis thaliana](#)

Fixed modifications: Carbamidomethyl (C)

Variable modifications: Oxidation (M), CyDye-Cy3 (C), CyDye-Cy5 (C), Oxidation (C)

Cleavage by Trypsin: cuts C-term side of KR unless next residue is P

Sequence Coverage: 16%

Matched peptides shown in **Bold Red**

```
1 MAKEPVRVLV TGAAGQIGYA LVPMIARGIM LGADQPVIH MLDIPPAAEA
51 LNGVKMELID AAFPLLKGVV ATTDAVEGCT GVNVAVMVGG FPRKEGMERK
101 DVMSKNVSIY KSQAAALEKH AAPNCKVLVV ANPANTNALI LKEFAPSIPE
151 KNISCLTRLD HNRALGQISE RLSVPVSDVK NVIIWGNHSS SQYPDVNHAK
201 VQTSSGEKPV RELVKDDAWL DGEFISTVQQ RGAAIKARK LSSALSAASS
251 ACDHIRDWVL GTPEGTFVSM GVYSDGSYSV PSGLIYSFPV TCRNGDWSIV
301 QGLPIDEVSR KKMDLTAEEL KEEKDLAYSC LS
```

| Start - End | Observed | Mr (expt) | Mr (calc) | Delta  | Miss | Sequence                                                                |
|-------------|----------|-----------|-----------|--------|------|-------------------------------------------------------------------------|
| 56 - 67     | 688.9003 | 1375.7860 | 1375.7421 | 0.0439 | 0    | <b>K.MELIDAAFPLLK.G</b> Oxidation (M) ( <a href="#">Ions score 73</a> ) |
| 127 - 142   | 825.5131 | 1649.0117 | 1648.9876 | 0.0241 | 0    | <b>K.VLVVANPANTNALILK.E</b> ( <a href="#">Ions score 14</a> )           |
| 127 - 142   | 550.7232 | 1649.1476 | 1648.9876 | 0.1601 | 0    | <b>K.VLVVANPANTNALILK.E</b> ( <a href="#">Ions score 40</a> )           |
| 143 - 151   | 509.3646 | 1016.7147 | 1016.5178 | 0.1969 | 0    | <b>K.EFAPSIPEK.N</b> ( <a href="#">Ions score 27</a> )                  |
| 164 - 171   | 437.2560 | 872.4974  | 872.4716  | 0.0258 | 0    | <b>R.ALGQISER.L</b> ( <a href="#">Ions score 63</a> )                   |
| 172 - 180   | 472.3175 | 942.6205  | 942.5386  | 0.0819 | 0    | <b>R.LSVPVSDVK.N</b> ( <a href="#">Ions score 44</a> )                  |



# gi|18391442 De-etiolated 3 (DET3)

## Protein View

Match to: gi|18391442 Score: 137

DET3 (DE-ETIOLATED 3) [Arabidopsis thaliana]

Found in search of C:\Documents and Settings\schen\Desktop\MengMeng\500ug Prep gel Plate 2\B4 1571.wiff

Nominal mass ( $M_r$ ): 42878; Calculated pI value: 5.40

NCBI BLAST search of [gi|18391442](#) against nr

Unformatted [sequence string](#) for pasting into other applications

Taxonomy: [Arabidopsis thaliana](#)

Links to retrieve other entries containing this sequence from NCBI Entrez:

[gi|12585488](#) from [Arabidopsis thaliana](#)

[gi|6636332](#) from [Arabidopsis thaliana](#)

[gi|8698731](#) from [Arabidopsis thaliana](#)

[gi|12248023](#) from [Arabidopsis thaliana](#)

[gi|16649005](#) from [Arabidopsis thaliana](#)

[gi|20259972](#) from [Arabidopsis thaliana](#)

Fixed modifications: Carbamidomethyl (C)

Variable modifications: Oxidation (M), CyDye-Cy3 (C), CyDye-Cy5 (C), Oxidation (C)

Cleavage by Trypsin: cuts C-term side of KR unless next residue is P

Sequence Coverage: 8%

Matched peptides shown in **Bold Red**

```
1 MTSRYYVVVSL PVKDSASSLW NRLQEQISKH SFDTPVYRFN IPNLRVGTLD
51 SLLALGDDLL KSNSFVEGVS QKIRRQIEEL ERISGVESNA LTVDGVPVDS
101 YLTRFVWDEA KYPTMSPLKE VVDNIQSQVA KIEDDLKVRV AEYNNIRGQL
151 NAINRKQSGS LAVRDLSNLV KPEDIVESEH LVTLLAVVPK YSQKDWLACY
201 ETLTDYVVPR SSKKLFEDNE YALYTVTLFT RVADNFRIAA REKGFQVRDF
251 EQSVEAQETR KQELAKLVQD QESLRSLLQ WCYTSYGEVF SSWMHFCAVR
301 TFAESIMRYG LPPAFLACVL SPAVKSEKKV RSILERLCDS TNSLYWKSEE
351 DAGAMAGLAG DSETHPYVSF TINLA
```

| Start - End | Observed | Mr(expt)  | Mr(calc)  | Delta   | Miss | Sequence                                                     |
|-------------|----------|-----------|-----------|---------|------|--------------------------------------------------------------|
| 5 - 13      | 545.8074 | 1089.6003 | 1089.6223 | -0.0219 | 0    | R.YVVVSLPVK.D ( <a href="#">Ions score 40</a> )              |
| 39 - 45     | 437.3059 | 872.5973  | 872.4868  | 0.1105  | 0    | R.FNIPNLR.V ( <a href="#">Ions score 37</a> )                |
| 112 - 119   | 476.7618 | 951.5091  | 951.4735  | 0.0355  | 0    | K.YPTMSPLK.E Oxidation (M) ( <a href="#">Ions score 13</a> ) |
| 148 - 155   | 443.3184 | 884.6223  | 884.4828  | 0.1395  | 0    | R.GQLNAINR.K ( <a href="#">Ions score 48</a> )               |

# gi|81621 Glyceraldehyde-3-phosphate dehydrogenase (NADP) B precursor

## Protein View

Match to: gi|81621 Score: 220

glyceraldehyde-3-phosphate dehydrogenase (NADP) (phosphorylating) (EC 1.2.1.13) B precursor, chloroplast  
Found in search of C:\Documents and Settings\schen\Desktop\MengMeng\500ug Prep gel Plate 2\B6 1581.wiff

Nominal mass ( $M_r$ ): 43168; Calculated pI value: 5.60

NCBI BLAST search of [gi|81621](#) against nr

Unformatted [sequence string](#) for pasting into other applications

Taxonomy: [Arabidopsis thaliana](#)

Links to retrieve other entries containing this sequence from NCBI Entrez:

[gi|336390](#) from [Arabidopsis thaliana](#)

Fixed modifications: Carbamidomethyl (C)

Variable modifications: Oxidation (M), CyDye-Cy3 (C), CyDye-Cy5 (C), Oxidation (C)

Cleavage by Trypsin: cuts C-term side of KR unless next residue is P

Sequence Coverage: 11%

Matched peptides shown in **Bold Red**

```
1 MSSIGGEASF FDAVAAQIIP KAVTTSTPVR GETVAKLKVA INGFGRIGRN
51 FLRCWHGRKD SPLEVVVLND SGGVKNASHL LKYDSMLGTF KAEVKIVDNE
101 TISVDGGLIK VVSNRDPLKL PWAEELGIDIV IEGTGVFVDG PGAGKHIQAG
151 ASKVIIITAPA KGADIPTYVM GVNEQDYGHD VANIISNASC TTNCLAPFAK
201 VLDEEFGIVK GTMTTTHSYT GDQRLLDASH RDLRRARAAA LNIVPTSTGA
251 AKAVSLVLPQ LKGKLNIAL RVPTPNVSVV DLVINVEKKG LTAEDVNEAF
301 RKAANGPMKG ILDVCDAPLV SVDFRCSVVS TTIDSSLTMV MGDDMVKVVA
351 WYDNEWGYSQ RVVDLAHLVA SKWPGAEAVG SGDPLEDFCK TNPADDECKV
401 YD
```

| Start - End | Observed | Mr(expt)  | Mr(calc)  | Delta   | Miss | Sequence                                                     |
|-------------|----------|-----------|-----------|---------|------|--------------------------------------------------------------|
| 96 - 107    | 645.3390 | 1288.6634 | 1288.6511 | 0.0124  | 0    | <b>K.IVDNETISVDGK.L</b> ( <a href="#">Ions score 95</a> )    |
| 201 - 210   | 574.8050 | 1147.5954 | 1147.6125 | -0.0170 | 0    | <b>K.VLDEEFGIVK.G</b> ( <a href="#">Ions score 52</a> )      |
| 238 - 252   | 692.8460 | 1383.6774 | 1383.7722 | -0.0947 | 0    | <b>R.AAALNIVPTSTGAAK.A</b> ( <a href="#">Ions score 35</a> ) |
| 253 - 262   | 534.3020 | 1066.5894 | 1066.6750 | -0.0856 | 0    | <b>K.AVSLVLPQLK.G</b> ( <a href="#">Ions score 38</a> )      |

# gi|14334740 Putative fructose biphosphate aldolase

## Protein View

Match to: gi|14334740 Score: 93

putative fructose bisphosphate aldolase [Arabidopsis thaliana]

Found in search of C:\Documents and Settings\schen\Desktop\MengMeng\500ug Prep gel Plate 2\D11 1762.wiff

Nominal mass ( $M_r$ ): 43033; Calculated pI value: 6.48

NCBI BLAST search of [gi|14334740](#) against nr

Unformatted [sequence string](#) for pasting into other applications

Taxonomy: [Arabidopsis thaliana](#)

Fixed modifications: Carbamidomethyl (C)

Variable modifications: Oxidation (M), CyDye-Cy3 (C), CyDye-Cy5 (C), Oxidation (C)

Cleavage by Trypsin: cuts C-term side of KR unless next residue is P

Sequence Coverage: 5%

Matched peptides shown in **Bold Red**

```
1 MASSTATMLK ASPVKSDWVK GQSLLLRQPS SVSAIRSHVA PSALTVRAAS
51 AYADELVKTA KTIASPGHGI MAMDESNATC GKRLASIGLE NTEANRQAYR
101 TLLVSAPGLG QYISGAILFE ETLYQSTTDG KKMVDVLVEQ NIVPGIKVDK
151 GLVPLVGSYD ESWCQGLDGL ASRTAAYYQQ GARFAKWRTV VSIPNGPSAL
201 AVKEAAWGLA RYAAISQDSG LVPIVEPEIM LDGEHSIDRT YDVAEKVWAE
251 VFFYLAQNNV MFEGILLKPS MVTPGAATD RATPEQVASY TLKLLRNRIP
301 PAVPGIMFSL GGQSGLEATL NLNAMNQAPN PWHVSFSYAR ALQNTCLKTW
351 GGKEENVKAA QDILLARAKA NSLAQLGKYT GEGESEEAKE GMFVKGYTY
```

| Start - End | Observed | Mr(expt)  | Mr(calc)  | Delta  | Miss | Sequence                                                  |
|-------------|----------|-----------|-----------|--------|------|-----------------------------------------------------------|
| 282 - 293   | 654.3682 | 1306.7218 | 1306.6769 | 0.0449 | 0    | <b>R.ATPEQVASYTLK.L</b> ( <a href="#">Ions score 45</a> ) |
| 370 - 378   | 451.2774 | 900.5402  | 900.5029  | 0.0374 | 0    | <b>K.ANSLAQLGK.Y</b> ( <a href="#">Ions score 48</a> )    |

# gi|15230595 Phosphoglycerate kinase 1 (PGK1)

## Protein View

Match to: gi|15230595 Score: 142

PGK1 (PHOSPHOGLYCERATE KINASE 1); phosphoglycerate kinase [Arabidopsis thaliana]

Found in search of C:\Documents and Settings\schen\Desktop\MengMeng\500ug Prep gel Plate 2\B1 1546.wiff

Nominal mass ( $M_r$ ): 50195; Calculated pI value: 5.91

NCBI BLAST search of [gi|15230595](#) against nr

Unformatted [sequence string](#) for pasting into other applications

Taxonomy: [Arabidopsis thaliana](#)

Fixed modifications: Carbamidomethyl (C)

Variable modifications: Oxidation (M), CyDye-Cy3 (C), CyDye-Cy5 (C), Oxidation (C)

Cleavage by Trypsin: cuts C-term side of KR unless next residue is P

Sequence Coverage: 7%

Matched peptides shown in **Bold Red**

```
1 MASAAASSAF SLLKSTGAVA SSAGTRARAS LLPIPSTSVS ARPLGFSATL
51 DSRRFSLHVA SKVESVRGKG SRGVVSMARK SVGDLTSADL KGKKVFVRAD
101 LNVPLDDNQT ITDDTRIRAA IPTIKYLIEN GAKVILSTHL GRPKGVTPKF
151 SLAPLVPRLS ELLGIEVTKA DDCIGPEVES LVASLPEGGV LLENVRFYK
201 EEEKNDPEFA KKLASLADLY VNDAFGTAHR AHASTEGVTK FLKPSVAGFL
251 LQKELDYLVG AVSNPKRPFA AIVGGSKVSS KIGVIESLLE KCDILLGGG
301 MIFTFYKAQG LSVGSSLVEE DKLELATELL AKAKAKGVSL LLPTDVVVAD
351 KFAPDANSKI VPASGIEDGW MGLDIGPDSI KTFNEALDTT QTVIWNGPMG
401 VFEMEKFAAG TEAIANKLAE LSEKGVTTII GGGDSVAAVE KVGAVGVMSH
451 ISTGGGASLE LLEGKVLPGV IALDEAIPVT V
```

Show predicted peptides also

Sort Peptides By

Residue Number  Increasing Mass  Decreasing Mass

| Start - End | Observed | Mr (expt) | Mr (calc) | Delta   | Miss | Sequence                                               |
|-------------|----------|-----------|-----------|---------|------|--------------------------------------------------------|
| 81 - 91     | 553.3099 | 1104.6052 | 1104.5663 | 0.0389  | 0    | K.SVGDLTSADLK.G ( <a href="#">Ions score 49</a> )      |
| 150 - 158   | 500.3133 | 998.6121  | 998.5913  | 0.0208  | 0    | K.FSLAPLVPRL.L ( <a href="#">Ions score 46</a> )       |
| 425 - 441   | 787.3732 | 1572.7319 | 1572.8359 | -0.1040 | 0    | K.GVTTIIGGDSVAAVEK.V ( <a href="#">Ions score 49</a> ) |

# gi|15240075 Succinate dehydrogenase 1-1 (SDH1-1)

## Protein View

Match to: gi|15240075 Score: 192

SDH1-1 (Succinate dehydrogenase 1-1) [Arabidopsis thaliana]

Found in search of C:\Documents and Settings\schen\Desktop\MengMeng\9\C4\_794.wiff

Nominal mass ( $M_r$ ): 70240; Calculated pI value: 5.86

NCBI BLAST search of [gi|15240075](#) against nr

Unformatted [sequence string](#) for pasting into other applications

Taxonomy: [Arabidopsis thaliana](#)

Fixed modifications: Carbamidomethyl (C)

Variable modifications: Oxidation (M), CyDye-Cy3 (C), CyDye-Cy5 (C), Oxidation (C)

Cleavage by Trypsin: cuts C-term side of KR unless next residue is P

Sequence Coverage: 5%

Matched peptides shown in **Bold Red**

```
1 MWRCVSRGFR APASKTSSLF DGVSGSRFSR FFSTGSTDTR SSYTIVDHTY
51 DAVVVVGAGGA GLRAAIGLSE HGFNTACITK LFPTRSHTVA AQQGINAALG
101 NMSEDDWRWH MYDTVKGS DW LGDQDAIQYM CREAPKAVIE LENYGLPFSR
151 TEEGKIYQRA FGGQSLDFGK GGQAYRCACA ADRTGHALLH TLYGQAMKHN
201 TQFFVEYFAL DLLMASDGSC QGVIALNMED GTLHRFRSSQ TILATGGYGR
251 AYFSATS AHT CTGDGNAMVA RAGLPLQDLE FVQFHPTGIY GAGCLITEGS
301 RGE G GILRNS EGERFMERYA PTAKDLASRD VVSR SMTMEI REGRGVGPHK
351 DHIY LHLNHL PPEVLKERLP GIS E TAAIFA GVDVTKEPIP VLPTVHYNMG
401 GIPTNYHGEV VTIKGDDPDA VIPGLMAAGE AACASVHGAN LGANSLLDI
451 VVFGRACANR VAEISKPG EK QKPLEKDAGE KTIAWLDRLR NSNGSLPTST
501 IRLNMQRIMQ NNAAVFRTQE TLEEGCQLID KAWESFGDVQ VKDRSMIWN S
551 DLIETLELEN LLINASITMH SAEARKESRG AHAREDFTKR EDGEWMKHTL
601 GYWEDEKVRL DYRPVHMDTL DDEIDTFPPK ARVY
```

Show predicted peptides also

Sort Peptides By

Residue Number  Increasing Mass  Decreasing Mass

| Start - End | Observed | Mr (expt) | Mr (calc) | Delta  | Miss | Sequence                                                              |
|-------------|----------|-----------|-----------|--------|------|-----------------------------------------------------------------------|
| 160 - 170   | 563.7965 | 1125.5785 | 1125.5455 | 0.0330 | 0    | <b>R.AFGGQSLDFGK.G</b> ( <a href="#">Ions score 51</a> )              |
| 442 - 455   | 737.4323 | 1472.8500 | 1472.8351 | 0.0149 | 0    | <b>R.LGANSLLDIVVFR.A</b> ( <a href="#">Ions score 86</a> )            |
| 508 - 517   | 590.3135 | 1178.6125 | 1178.5866 | 0.0259 | 0    | <b>R.IMQNNAAVFR.T</b> Oxidation (M) ( <a href="#">Ions score 56</a> ) |

# gi|3256066 Chloroplast NAD-dependent malate dehydrogenase

## Protein View

Match to: gi|3256066 Score: 164

chloroplast NAD-MDH [Arabidopsis thaliana]

Found in search of C:\Documents and Settings\schen\Desktop\MengMeng\500ug Prep gel Plate 2\H12 2051.wiff

Nominal mass ( $M_r$ ): 42623; Calculated pI value: 8.48

NCBI BLAST search of [gi|3256066](#) against nr

Unformatted [sequence string](#) for pasting into other applications

Taxonomy: [Arabidopsis thaliana](#)

Fixed modifications: Carbamidomethyl (C)

Variable modifications: Oxidation (M), CyDye-Cy3 (C), CyDye-Cy5 (C), Oxidation (C)

Cleavage by Trypsin: cuts C-term side of KR unless next residue is P

Sequence Coverage: 10%

Matched peptides shown in **Bold Red**

```
1 MATATSASLF STVSSSYSKA SSIPHSRLQS VKFNSVPSFT GLKSTSLISG
51 SDSSSLTKTL RGSVTNAQTS DKKPYGFKIN ASYKVAVLGA AGGIGQPLSL
101 LIKMSPLVST LHLYDIANVK GVAADLSHCN TPSQVRDFTG PSELADCLKD
151 VNVVVIPAGV PRKPGMTRDD LFNINANIVK TLVEAVAENC PNAFIHIISN
201 PVNSTVPIAA EVLKKKGVYD PKKLFGVTTL DVVRANTFVS QKKNLKLIDV
251 DVPVIGGHAG ITILPLLSKT KPSVNFTDEE IQELTVRIQN AGTEVVDAKA
301 GAGSATLSMA YAAARFVESS LRALDGDGDV YECSEVESTL TDLPPFFASRV
351 KIGKNGLEAV IESDLQGLTE YEQKALEALK VELKASIDKG VAFANKPAAA
401 AAN
```

| Start - End | Observed | Mr (expt) | Mr (calc) | Delta   | Miss | Sequence                                                   |
|-------------|----------|-----------|-----------|---------|------|------------------------------------------------------------|
| 150 - 162   | 667.8972 | 1333.7799 | 1333.7718 | 0.0081  | 0    | <b>K.DVNVVVIPAGVPR.K</b> ( <a href="#">Ions score 50</a> ) |
| 224 - 234   | 610.3568 | 1218.6990 | 1218.6972 | 0.0017  | 0    | <b>K.LFGVTTLDVVR.A</b> ( <a href="#">Ions score 22</a> )   |
| 288 - 299   | 622.7974 | 1243.5803 | 1243.6408 | -0.0605 | 0    | <b>R.IQNAGTEVVDAK.A</b> ( <a href="#">Ions score 51</a> )  |
| 316 - 322   | 419.2391 | 836.4636  | 836.4392  | 0.0244  | 0    | <b>R.FVSSLR.A</b> ( <a href="#">Ions score 40</a> )        |

# gi|7769871 F12M16.14

## Protein View

Match to: gi|7769871 Score: 86

F12M16.14 [Arabidopsis thaliana]

Found in search of C:\Documents and Settings\schen\Desktop\MengMeng\500ug Prep gel Plate 2\2016.wiff

Nominal mass ( $M_r$ ): 37197; Calculated pI value: 8.54

NCBI BLAST search of [gi|7769871](#) against nr

Unformatted [sequence string](#) for pasting into other applications

Taxonomy: [Arabidopsis thaliana](#)

Fixed modifications: Carbamidomethyl (C)

Variable modifications: Oxidation (M), CyDye-Cy3 (C), CyDye-Cy5 (C), Oxidation (C)

Cleavage by Trypsin: cuts C-term side of KR unless next residue is P

Sequence Coverage: 7%

Matched peptides shown in **Bold Red**

```
1 MFRSMLVRSS ASAKQAVIRR SFSSGSVPER KVAILGAAGG IGQPLALLMK
51 LNPLVSSL LSL YDIANTPGVA ADVGHINTRS EVVGYMGDDN LAKALEGADL
101 VIIPAGVPRK PGMTRDDL FN INAGIVKNLC TAIKYCPHA LINMISNPVN
151 STVPIAAEIF KKAGMYDEKK LFGVTTLDVV RARTFYAGKA NVPVAEVNVP
201 VIGGHAGVTI LPLFSQVSSH FLSTQTVATP QANLSSDILT ALTKRTQDGG
251 TEVVEAKAGK GSATLSMAYA GALFADACLK GLNGVPDVIE CSYVQSTITE
301 LPFFASKVRL GKNGVEEVLD LGPLSDFEKE GLEALKPELK SSIEKGVKFA
351 NQ
```

| Start - End | Observed | Mr(expt)  | Mr(calc)  | Delta   | Miss | Sequence                                                            |
|-------------|----------|-----------|-----------|---------|------|---------------------------------------------------------------------|
| 80 - 93     | 757.7786 | 1513.5427 | 1512.6766 | 0.8661  | 0    | R.SEVVG YMGDDNLAK.A Oxidation (M) ( <a href="#">Ions score 40</a> ) |
| 171 - 181   | 610.3155 | 1218.6164 | 1218.6972 | -0.0809 | 0    | K.LFGVTTLDVVR.A ( <a href="#">Ions score 47</a> )                   |

# gi|904041 Adenosine triphosphatase

## Protein View

Match to: gi|904041 Score: 130

adenosine triphosphatase

Found in search of C:\Documents and Settings\schen\Desktop\MengMeng\0226 PLATE1 10SAMPLES\F4 1223.wiff

Nominal mass ( $M_r$ ): 53930; Calculated pI value: 5.05

NCBI BLAST search of [gi|904041](#) against nr

Unformatted [sequence string](#) for pasting into other applications

Taxonomy: [Akebia quinata](#)

Fixed modifications: Carbamidomethyl (C)

Variable modifications: Oxidation (M), CyDye-Cy3 (C), CyDye-Cy5 (C), Oxidation (C)

Cleavage by Trypsin: cuts C-term side of KR unless next residue is P

Sequence Coverage: 9%

Matched peptides shown in **Bold Red**

```
1 XXXXXXXXXXXX XXXXXXXXXXXX XXIAQIIGPV LDVAFPPGKM PNIYNALVVK
51 GRDTVDDQQIN VTCEVQQLLG NNRVRVAVMS ATDGLMRGMK VIDTGAPLSV
101 PVGGATLGRI FNVLGEPVDN LXXXXXXXXTXS PMHRSAPAFI QLDTKLSIFE
151 TGIKVVDLLA PYRRGGKIGL FGGAGVGKTV LIMELINNIA KAHGGVSVFG
201 GVGERTREGN DLYMEMKESG VINEQNIPES KVALVYGQMN EPPGARMRVG
251 LTALTMAEYF RDVNEQDVLL FIDNIFRFVQ AGSEVSALLG RXXSAVGYQP
301 TLSTEMGSLQ ERITSTKEGS ITSIQAVYVP ADDLTDPPAPA TTFAHLDATF
351 VLSRGLAAKG IYPAVDPLDS TSTMLQPRIV GEEHYETAQR VKQTSQRYKE
401 LQDIIAILGL DELSEDDRLT VARARKIERF LSQPPFVAEV FTGSPGKYVG
451 LTETIRGFQL ILSGELDGLP EQAFYLVGNI DEATAKAMNL EVESNLKK
```

| Start - End | Observed | Mr(expt)  | Mr(calc)  | Delta   | Miss | Sequence                                                                          |
|-------------|----------|-----------|-----------|---------|------|-----------------------------------------------------------------------------------|
| 40 - 50     | 639.3996 | 1276.7847 | 1276.6849 | 0.0998  | 0    | <b>K.MPNIYNALVVK.G</b> Oxidation (M) ( <a href="#">Ions score 50</a> )            |
| 155 - 163   | 523.3224 | 1044.6303 | 1044.5968 | 0.0335  | 0    | <b>K.VVDLLAPYR.R</b> ( <a href="#">Ions score 30</a> )                            |
| 168 - 178   | 488.3454 | 974.6762  | 974.5549  | 0.1213  | 0    | <b>K.IGLFGGAGVGK.T</b> ( <a href="#">Ions score 36</a> )                          |
| 232 - 246   | 809.3937 | 1616.7728 | 1616.7981 | -0.0253 | 0    | <b>K.VALVYGQMN<b>EPPGAR.M</b></b> Oxidation (M) ( <a href="#">Ions score 15</a> ) |



# gi|14423528 Putative fructokinase

## Protein View

Match to: gi|14423528 Score: 123

putative fructokinase [Arabidopsis thaliana]

Found in search of C:\Documents and Settings\schen\Desktop\MengMeng\500ug Prep gel Plate 2\1913.wiff

Nominal mass ( $M_r$ ): 35405; Calculated pI value: 5.30

NCBI BLAST search of [gi|14423528](#) against nr

Unformatted [sequence string](#) for pasting into other applications

Taxonomy: [Arabidopsis thaliana](#)

Links to retrieve other entries containing this sequence from NCBI Entrez:

[gi|22136070](#) from [Arabidopsis thaliana](#)

Fixed modifications: Carbamidomethyl (C)

Variable modifications: Oxidation (M), CyDye-Cy3 (C), CyDye-Cy5 (C), Oxidation (C)

Cleavage by Trypsin: cuts C-term side of KR unless next residue is P

Sequence Coverage: 10%

Matched peptides shown in **Bold Red**

```
1 MASNGDKGLI VSGEMLIDF VPTESGVSLA EAPGFLKAPG GAPANVAIAV
51 SRLGGRSAFV GKLGDEFH MLAGILRKNG VDDQGINFDT GARTALAFVT
101 LRADGDREFM FYHNPSADML LRPDELNLDL IRSAKVFHYG SISLIVEPCR
151 SAHLKAMEVA KEAGALLSYD PNLREPLWPS KEEAKTQIMS IWDKAEIIKV
201 SDVELEFLTG SNKIDDETAL TLWHPNLLL LVTLGEKGCR YYTKTFKGAV
251 DPFHVNAVDT TGAGDSFVGA LLNQIVDDRS VLEDEERLRK VLRFANACGA
301 ITTTKGAIP ALPSDAEVRS FLEKK
```

| Start - End      | Observed        | Mr(expt)         | Mr(calc)         | Delta          | Miss     | Sequence                                                             |
|------------------|-----------------|------------------|------------------|----------------|----------|----------------------------------------------------------------------|
| <b>38 - 52</b>   | <b>675.8471</b> | <b>1349.6796</b> | <b>1349.7415</b> | <b>-0.0620</b> | <b>0</b> | <b>K.APGGAPANVAIAVSR.L</b> ( <a href="#">Ions score 34</a> )         |
| <b>186 - 194</b> | <b>569.2463</b> | <b>1136.4780</b> | <b>1136.5536</b> | <b>-0.0756</b> | <b>0</b> | <b>K.TQIMSIWDK.A</b> Oxidation (M) ( <a href="#">Ions score 29</a> ) |
| <b>229 - 237</b> | <b>493.2918</b> | <b>984.5691</b>  | <b>984.6219</b>  | <b>-0.0528</b> | <b>0</b> | <b>K.LLLVTLGEK.G</b> ( <a href="#">Ions score 60</a> )               |

# gi|693690 Aspartate aminotransferase

## Protein View

Match to: gi|693690 Score: 114

aspartate aminotransferase

Found in search of C:\Documents and Settings\schen\Desktop\MengMeng\500ug Prep gel Plate 2\B6 1581.wiff

Nominal mass ( $M_r$ ): 44497; Calculated pI value: 6.80

NCBI BLAST search of [gi|693690](#) against nr

Unformatted [sequence string](#) for pasting into other applications

Taxonomy: [Arabidopsis thaliana](#)

Fixed modifications: Carbamidomethyl (C)

Variable modifications: Oxidation (M), CyDye-Cy3 (C), CyDye-Cy5 (C), Oxidation (C)

Cleavage by Trypsin: cuts C-term side of KR unless next residue is P

Sequence Coverage: 5%

Matched peptides shown in **Bold Red**

```
1 MDSVFSNVAR APEDPILGVT VAYNNDPSPV KINLGVGAYR TEEGKPLVLD
51 VVRKAEQQLV NDPSRVKEYI PIVGISDFNK LSAKLILGAD SPAITESRVT
101 TVQCLSGTGS LRVGAEFLKT HYHQSVIYIP KPTWGNHPKV FNLAGLSVEY
151 FRYYDPATRG LDFKGLLEDL GAAPSGAIVL LHACAHNPTG VDPTSEQWEQ
201 IRQLMRSKSL LPFFDSAYQG FASGSLDTDA QSVRTFVADG GECLIAQSYT
251 KNMGLYGERV GALSIVCKSA DVASKVESQV KLVVRPMYSS PPIHGASIVA
301 TILKSSDMYN NWTIELKEMA DRIKSMRQQL FEAIQARGTP GDWSHIKQI
351 GMFTFTGLNK EQVEFMTKEF HIYMTSDGRI SMAGLSSKTV PHLADAMHAA
401 VTRLG
```

| Start - End | Observed | Mr(expt) | Mr(calc) | Delta  | Miss | Sequence                                                            |
|-------------|----------|----------|----------|--------|------|---------------------------------------------------------------------|
| 32 - 40     | 481.7991 | 961.5837 | 961.5345 | 0.0492 | 0    | <b>K.INLGVGAYR.T</b> ( <a href="#">Ions score 62</a> )              |
| 153 - 159   | 443.2554 | 884.4963 | 884.4028 | 0.0935 | 0    | <b>R.YYDPATR.G</b> ( <a href="#">Ions score 18</a> )                |
| 252 - 259   | 478.2617 | 954.5089 | 954.4229 | 0.0860 | 0    | <b>K.NMGLYGER.V</b> Oxidation (M) ( <a href="#">Ions score 34</a> ) |

# gi|6966930 Glutamine synthetase

## Protein View

Match to: gi|6966930 Score: 83

glutamine synthetase [Brassica napus]

Found in search of C:\Documents and Settings\schen\Desktop\MengMeng\14\D2\_979.wiff

Nominal mass ( $M_r$ ): 47889; Calculated pI value: 6.37

NCBI BLAST search of [gi|6966930](#) against nr

Unformatted [sequence string](#) for pasting into other applications

Taxonomy: [Brassica napus](#)

Fixed modifications: Carbamidomethyl (C)

Variable modifications: Oxidation (M), CyDye-Cy3 (C), CyDye-Cy5 (C), Oxidation (C)

Cleavage by Trypsin: cuts C-term side of KR unless next residue is P

Sequence Coverage: 5%

Matched peptides shown in **Bold Red**

```
1 MAQILAASPT CQMRLTKPSS IASSKLWNSV VLKQKKQSSS KVRSFKVMAI
51 QSDNSTINRV ESLLNLDTKP FTDRIIAEYI WYGGSGIDLR SKSRTLEKPV
101 EDPSELPKWN YDGSSTGQAP GEDSEVILYP QAIFRDPFRG GNNILVICDT
151 YTPAGEPIPT NKRARAAAEIF SNKKVNEEIP WFGIEQEYTL LQPNVNWPLG
201 WPVGAYPGPQ GPYYCGVGAE KSWGRDISDA HYKACLYAGI NISGTNGEVM
251 PGQWEFQVGP SVRIEAGDHV WCARYLLERI TEQAGVVLTL DPKPIEGDWN
301 GAGCHTNYST KSMREDGGFE VIKKAILNLS LRHMEHIIAY GEGNERRLTG
351 KHETASIDQF SWGVANRGCS IRVGRDTEKK GKGYLEDRRP ASNMDPYIVT
401 SLLAETLLW EPTLEAEALA AQKLSLKV
```

| Start - End | Observed | Mr (expt) | Mr (calc) | Delta  | Miss | Sequence                                                    |
|-------------|----------|-----------|-----------|--------|------|-------------------------------------------------------------|
| 95 - 108    | 528.0324 | 1581.0752 | 1580.8297 | 0.2455 | 0    | <b>R.TLEKPV</b> EDPSELK.W ( <a href="#">Ions score 51</a> ) |
| 166 - 173   | 440.2458 | 878.4771  | 878.4498  | 0.0274 | 0    | <b>R.AAEIF</b> SNK.K ( <a href="#">Ions score 32</a> )      |

# gi|1070000 Biotin carboxyl carrier protein

## Protein View

Match to: gi|1070000 Score: 74

biotin carboxyl carrier protein [Brassica napus]

Found in search of C:\Documents and Settings\schen\Desktop\MengMeng\A8 2106.wiff

Nominal mass ( $M_r$ ): 20791; Calculated pI value: 4.60

NCBI BLAST search of [gi|1070000](#) against nr

Unformatted [sequence string](#) for pasting into other applications

Taxonomy: [Brassica napus](#)

Links to retrieve other entries containing this sequence from NCBI Entrez:

[gi|1589040](#) from [Brassica napus](#)

Fixed modifications: Carbamidomethyl (C)

Variable modifications: Oxidation (M), CyDye-Cy3 (C), CyDye-Cy5 (C), Oxidation (C)

Cleavage by Trypsin: cuts C-term side of KR unless next residue is P

Sequence Coverage: 12%

Matched peptides shown in **Bold Red**

```
1 SEGKDENSSK DPSSSTDLAT EESISEFLTQ VTTLVKLVDS RDIVELQLKQ
51 LDCELVIRKK EALPQPESPA QYVMMQQPNQ SSYVQSVAPP SAPAASPAPS
101 TPASSPHTLH YSSYSSLPTV KSPMAGTFYR SPGPGEPFFI KVGDKVQKGQ
151 VLCIVEAMKL MNEIESDNGT VVDIVAEMQP VSLDTPLFVV QP
```

| Start - End | Observed | Mr(expt)  | Mr(calc)  | Delta  | Miss | Sequence                                                   |
|-------------|----------|-----------|-----------|--------|------|------------------------------------------------------------|
| 37 - 49     | 509.9990 | 1526.9753 | 1526.8668 | 0.1085 | 1    | <b>K.LVDSRDIVELQLK.Q</b> ( <a href="#">Ions score 31</a> ) |
| 131 - 141   | 563.3258 | 1124.6370 | 1124.5866 | 0.0504 | 0    | <b>R.SPGPGEPFFIK.V</b> ( <a href="#">Ions score 43</a> )   |

# gi|15228194 Sedoheptulose biphosphatase (SBPASE)

## Protein View

Match to: gi|15228194 Score: 208

SBPASE (sedoheptulose-bisphosphatase); phosphoric ester hydrolase [Arabidopsis thaliana]

Found in search of C:\Documents and Settings\schen\Desktop\MengMeng\500ug Prep gel Plate 2\D12 1767.wiff

Nominal mass ( $M_r$ ): 42787; Calculated pI value: 6.17

NCBI BLAST search of [gi|15228194](#) against nr

Unformatted [sequence string](#) for pasting into other applications

Taxonomy: [Arabidopsis thaliana](#)

Links to retrieve other entries containing this sequence from NCBI Entrez:

[gi|1173345](#) from [Arabidopsis thaliana](#)

[gi|786466](#) from [Arabidopsis thaliana](#)

[gi|7263568](#) from [Arabidopsis thaliana](#)

Fixed modifications: Carbamidomethyl (C)

Variable modifications: Oxidation (M), CyDye-Cy3 (C), CyDye-Cy5 (C), Oxidation (C)

Cleavage by Trypsin: cuts C-term side of KR unless next residue is P

Sequence Coverage: 13%

Matched peptides shown in **Bold Red**

```
1 METSIACYSR GILPPSVSSQ RSSTLVSPPS YSTSSSFKRL KSSSIFGDSL
51 RLAPKSQLKA TKAKSNGAST VTKCEIGQSL EEFLAQATPD KGLRTLMMCM
101 GEALRTIAFK VRTASCGGTA CVNSFGDEQL AVDMLADKLL FEALQYSHVC
151 KYACSEEVPE LQDMGGPVEG GFSVAFDPLD GSSIVDTNFT VGTIFGVWPG
201 DKLTGITGGD QVAAAMGIYG PRTTYVLAVK GFPGTHEFLL LDEGKWQHVK
251 ETTEIAEGKM FSPGNLRATF DNSEYSKLID YVKEKYTLR YTGGMVPDVN
301 QIIVKEKGIF TNVTSPTAKA KLRLLEFVAP LGLLIENAGG FSSDGHKSVL
351 DKTIINLDDR TQVAYGSKNE IIRFEETLYG TSRLKNVPIG VTA
```

| Start - End | Observed | Mr (expt) | Mr (calc) | Delta   | Miss | Sequence                                                            |
|-------------|----------|-----------|-----------|---------|------|---------------------------------------------------------------------|
| 223 - 230   | 447.7505 | 893.4865  | 893.5222  | -0.0357 | 0    | <b>R.TTYVLAVK.G</b> ( <a href="#">Ions score 27</a> )               |
| 260 - 267   | 469.2111 | 936.4077  | 936.4487  | -0.0410 | 0    | <b>K.MFSPGNLR.A</b> Oxidation (M) ( <a href="#">Ions score 24</a> ) |
| 268 - 277   | 581.2725 | 1160.5304 | 1160.4986 | 0.0319  | 0    | <b>R.ATFDNSEYSK.L</b> ( <a href="#">Ions score 24</a> )             |
| 278 - 284   | 457.2706 | 912.5266  | 912.4957  | 0.0309  | 0    | <b>K.LIDYYVK.E</b> ( <a href="#">Ions score 28</a> )                |
| 308 - 319   | 618.3155 | 1234.6164 | 1234.6558 | -0.0393 | 0    | <b>K.GIFTNVTSPTAK.A</b> ( <a href="#">Ions score 58</a> )           |
| 374 - 383   | 601.8135 | 1201.6124 | 1201.5615 | 0.0509  | 0    | <b>R.FEETLYGTSR.L</b> ( <a href="#">Ions score 48</a> )             |

# gi|1143445 Cinnamyl alcohol dehydrogenase

## Protein View

Match to: gi|1143445 Score: 56

cinnamyl alcohol dehydrogenase [Eucalyptus gunnii]

Found in search of C:\Documents and Settings\schen\Desktop\MengMeng\500ug Prep gel Plate 2\D12 1767.wiff

Nominal mass ( $M_r$ ): 36053; Calculated pI value: 8.15

NCBI BLAST search of [gi|1143445](#) against nr

Unformatted [sequence string](#) for pasting into other applications

Taxonomy: [Eucalyptus gunnii](#)

Fixed modifications: Carbamidomethyl (C)

Variable modifications: Oxidation (M), CyDye-Cy3 (C), CyDye-Cy5 (C), Oxidation (C)

Cleavage by Trypsin: cuts C-term side of KR unless next residue is P

Sequence Coverage: 2%

Matched peptides shown in **Bold Red**

```
1 MSAAGGAGKV VCVTGASRYI ASWLVKLLLQ RGYTVKASVR DPNDPKKTEH
51 LLGLDGAKDR LQLFKANLLE EGSFDPIVEG CAGVFHTASP FYHDVKDPQA
101 ELLDPAVKGT LNVLKSCSKA PSLQRVVLTS SMAAVAYNRQ PRTPEVVVDE
151 SWFSDPDLCR QTNAWYVLSK TLAEDAAWKF VKEKGIDMVT INPAMVIGPL
201 LQPTLNLSAA AIGNLINGAP TFPNASFGWV NVKDVANAHI LAFEVPSASG
251 RYCLVERIAH YSEIVRILRE LYPSAQLPEK SADDKPFVPI YQVSKEKVKKS
301 LGINYIPLEQ NLKETVESLK EKG FVKF
```

| Start - End | Observed | Mr (expt) | Mr (calc) | Delta  | Miss | Sequence              |                                   |
|-------------|----------|-----------|-----------|--------|------|-----------------------|-----------------------------------|
| 171 - 179   | 502.7760 | 1003.5374 | 1003.4974 | 0.0400 | 0    | <b>K.TLAEDA</b> AWK.F | ( <a href="#">Ions score 56</a> ) |

MS/MS Fragmentation of **TLAEDAAWK**

Found in **gi|1143445**, cinnamyl alcohol dehydrogenase [Eucalyptus gunnii]

| #        | <b>b</b> | <b>b<sup>++</sup></b> | <b>b<sup>0</sup></b> | <b>b<sup>0++</sup></b> | Seq.     | <b>y</b>        | <b>y<sup>++</sup></b> | <b>y<sup>*</sup></b> | <b>y<sup>*++</sup></b> | <b>y<sup>0</sup></b> | <b>y<sup>0++</sup></b> | #        |
|----------|----------|-----------------------|----------------------|------------------------|----------|-----------------|-----------------------|----------------------|------------------------|----------------------|------------------------|----------|
| <b>1</b> | 102.0550 | 51.5311               | 84.0444              | 42.5258                | <b>T</b> |                 |                       |                      |                        |                      |                        | <b>9</b> |
| <b>2</b> | 215.1390 | 108.0731              | 197.1285             | 99.0679                | <b>L</b> | 903.4571        | 452.2322              | 886.4305             | 443.7189               | 885.4465             | 443.2269               | <b>8</b> |
| <b>3</b> | 286.1761 | 143.5917              | 268.1656             | 134.5864               | <b>A</b> | <b>790.3730</b> | 395.6901              | 773.3464             | 387.1769               | 772.3624             | 386.6849               | <b>7</b> |
| <b>4</b> | 415.2187 | 208.1130              | 397.2082             | 199.1077               | <b>E</b> | <b>719.3359</b> | 360.1716              | 702.3093             | 351.6583               | 701.3253             | 351.1663               | <b>6</b> |
| <b>5</b> | 530.2457 | 265.6265              | 512.2351             | 256.6212               | <b>D</b> | <b>590.2933</b> | 295.6503              | 573.2667             | 287.1370               | 572.2827             | 286.6450               | <b>5</b> |
| <b>6</b> | 601.2828 | 301.1450              | 583.2722             | 292.1397               | <b>A</b> | <b>475.2663</b> | 238.1368              | 458.2398             | 229.6235               |                      |                        | <b>4</b> |
| <b>7</b> | 672.3199 | 336.6636              | 654.3093             | 327.6583               | <b>A</b> | <b>404.2292</b> | 202.6183              | 387.2027             | 194.1050               |                      |                        | <b>3</b> |
| <b>8</b> | 858.3992 | 429.7032              | 840.3886             | 420.6980               | <b>W</b> | <b>333.1921</b> | 167.0997              | 316.1656             | 158.5864               |                      |                        | <b>2</b> |
| <b>9</b> |          |                       |                      |                        | <b>K</b> | 147.1128        | 74.0600               | 130.0863             | 65.5468                |                      |                        | <b>1</b> |

# gi|15232763 Adenosine kinase 1 (ADK1)

## Protein View

Match to: gi|15232763 Score: 59

ADK1 (ADENOSINE KINASE 1) [Arabidopsis thaliana]

Found in search of C:\Documents and Settings\schen\Desktop\MengMeng\500ug Prep gel Plate 2\D11 1762.wiff

Nominal mass ( $M_r$ ): 38268; Calculated pI value: 5.29

NCBI BLAST search of [gi|15232763](#) against nr

Unformatted [sequence string](#) for pasting into other applications

Taxonomy: [Arabidopsis thaliana](#)

Links to retrieve other entries containing this sequence from NCBI Entrez:

[gi|17367081](#) from [Arabidopsis thaliana](#)

[gi|6681336](#) from [Arabidopsis thaliana](#)

[gi|12017762](#) from [Arabidopsis thaliana](#)

[gi|12017766](#) from [Arabidopsis thaliana](#)

[gi|14030721](#) from [Arabidopsis thaliana](#)

Fixed modifications: Carbamidomethyl (C)

Variable modifications: Oxidation (M),CyDye-Cy3 (C),CyDye-Cy5 (C),Oxidation (C)

Cleavage by Trypsin: cuts C-term side of KR unless next residue is P

Sequence Coverage: 2%

Matched peptides shown in **Bold Red**

```
1 MASSDFDGL LGMGNPLLDV SAVVDQQFLD KYDIKLNNAI LAEDKHLPMPY
51 DEMSQKFNVE YIAGGATQNS IKVAQWMLQV PGATSYMGSI GKDKYGEAMK
101 KDATAAGVYV HYYEATPT GTCGVCVLGG ERSLIANLSA ANCYKVEHLK
151 KPENWALVEK AKFYIAGFF LTVSPESIQV VREHAAANNK VFTMNLSPF
201 ICEFFKDVQE KCLPYMDYIF GNETEARTFS RVHGWETDDV EQIAIKMSQL
251 PKASGTYKRT TVITQGADPV VVAEDGKVKK YPVIPLPKEK LVDTNGAGDA
301 FVGGFLSQLV HGKGIIECVR AGCYASNVI QRSRGCTYPEK PDFN
```

| Start - End | Observed | Mr (expt) | Mr (calc) | Delta   | Miss | Sequence                                                |
|-------------|----------|-----------|-----------|---------|------|---------------------------------------------------------|
| 36 - 45     | 550.7933 | 1099.5721 | 1099.5873 | -0.0152 | 0    | <b>K.LNNAILAEDK.H</b> ( <a href="#">Ions score 59</a> ) |



MS/MS Fragmentation of **LNNAILAEDK**

Found in **gi|15232763**, ADK1 (ADENOSINE KINASE 1) [*Arabidopsis thaliana*]

| #         | <b>b</b>        | <b>b<sup>++</sup></b> | <b>b*</b>       | <b>b<sup>*++</sup></b> | <b>b<sup>0</sup></b> | <b>b<sup>0++</sup></b> | Seq.     | <b>y</b>        | <b>y<sup>++</sup></b> | <b>y*</b> | <b>y<sup>*++</sup></b> | <b>y<sup>0</sup></b> | <b>y<sup>0++</sup></b> | #         |
|-----------|-----------------|-----------------------|-----------------|------------------------|----------------------|------------------------|----------|-----------------|-----------------------|-----------|------------------------|----------------------|------------------------|-----------|
| <b>1</b>  | 114.0913        | 57.5493               |                 |                        |                      |                        | <b>L</b> |                 |                       |           |                        |                      |                        | <b>10</b> |
| <b>2</b>  | <b>228.1343</b> | 114.5708              | <b>211.1077</b> | 106.0575               |                      |                        | <b>N</b> | <b>987.5106</b> | 494.2589              | 970.4840  | 485.7456               | 969.5000             | 485.2536               | <b>9</b>  |
| <b>3</b>  | <b>342.1772</b> | 171.5922              | <b>325.1506</b> | 163.0790               |                      |                        | <b>N</b> | <b>873.4676</b> | 437.2374              | 856.4411  | 428.7242               | 855.4571             | 428.2322               | <b>8</b>  |
| <b>4</b>  | 413.2143        | 207.1108              | 396.1878        | 198.5975               |                      |                        | <b>A</b> | <b>759.4247</b> | 380.2160              | 742.3981  | 371.7027               | 741.4141             | 371.2107               | <b>7</b>  |
| <b>5</b>  | 526.2984        | 263.6528              | <b>509.2718</b> | 255.1395               |                      |                        | <b>I</b> | <b>688.3876</b> | 344.6974              | 671.3610  | 336.1842               | 670.3770             | 335.6921               | <b>6</b>  |
| <b>6</b>  | 639.3824        | 320.1949              | 622.3559        | 311.6816               |                      |                        | <b>L</b> | <b>575.3035</b> | 288.1554              | 558.2770  | 279.6421               | 557.2930             | 279.1501               | <b>5</b>  |
| <b>7</b>  | <b>710.4196</b> | 355.7134              | 693.3930        | 347.2001               |                      |                        | <b>A</b> | <b>462.2195</b> | 231.6134              | 445.1929  | 223.1001               | 444.2089             | 222.6081               | <b>4</b>  |
| <b>8</b>  | 839.4621        | 420.2347              | 822.4356        | 411.7214               | 821.4516             | 411.2294               | <b>E</b> | <b>391.1823</b> | 196.0948              | 374.1558  | 187.5815               | 373.1718             | 187.0895               | <b>3</b>  |
| <b>9</b>  | 954.4891        | 477.7482              | 937.4625        | 469.2349               | 936.4785             | 468.7429               | <b>D</b> | <b>262.1397</b> | 131.5735              | 245.1132  | 123.0602               | 244.1292             | 122.5682               | <b>2</b>  |
| <b>10</b> |                 |                       |                 |                        |                      |                        | <b>K</b> | 147.1128        | 74.0600               | 130.0863  | 65.5468                |                      |                        | <b>1</b>  |

# gi|1827677 Enoyl reductase

## Protein View

Match to: gi|1827677 Score: 66

Chain , Brassica Napus Enoyl Acp ReductaseNADH BINARY COMPLEX AT Ph 8.0 And Room Temperature

Found in search of C:\Documents and Settings\schen\Desktop\MengMeng\500ug Prep gel Plate 2\G10 1989.wiff

Nominal mass ( $M_r$ ): 32983; Calculated pI value: 5.24

NCBI BLAST search of [gi|1827677](#) against nr

Unformatted [sequence string](#) for pasting into other applications

Taxonomy: [Brassica napus](#)

Links to retrieve other entries containing this sequence from NCBI Entrez:

[gi|1827678](#) from [Brassica napus](#)

Fixed modifications: Carbamidomethyl (C)

Variable modifications: Oxidation (M), CyDye-Cy3 (C), CyDye-Cy5 (C), Oxidation (C)

Cleavage by Trypsin: cuts C-term side of KR unless next residue is P

Sequence Coverage: 7%

Matched peptides shown in **Bold Red**

```
1  SESSESKASS  GLPIDLRGKR  AFIAGIADDN  GYGWAVAKSL  AAAGAEILVG
51  TWVPALNIFE  TSLRRGKFDQ  SRVLPDGSLM  EIKKVYPLDA  VFDNPEDVPE
101 DVKANKRYAG  SSNWTVQEAA  ECVRQDFGSI  DILVHSLANG  PEVSKP LLET
151 SRKGYLAAIS  ASSYSFVSL  SHFLPIMNPG  GASISLTYIA  SERIIPGYGG
201 GMSSAKAALE  SDTRVLAFEA  GRKQNIRVNT  ISAGPLGSRA  AKAIGFIDTM
251 IEYSYNNAPI  QKTLTADVEG  NAAAFVLSPL  ASAITGATIIY  VDNLNSMGV
301 ALDSPVFKDL  DK
```

| Start - End | Observed | Mr(expt)  | Mr(calc)  | Delta  | Miss | Sequence                                                                 |
|-------------|----------|-----------|-----------|--------|------|--------------------------------------------------------------------------|
| 73 - 83     | 609.3338 | 1216.6531 | 1216.6373 | 0.0158 | 0    | R.VLPDGS <b>LM</b> EIK.K Oxidation (M) ( <a href="#">Ions score 16</a> ) |
| 228 - 239   | 586.3465 | 1170.6785 | 1170.6357 | 0.0429 | 0    | R.VNT <b>ISAGPL</b> GSRA.A ( <a href="#">Ions score 49</a> )             |

# gi|18406430 Dihydrodipicolinate reductase family protein

## Protein View

Match to: gi|18406430 Score: 70

dihydrodipicolinate reductase family protein [Arabidopsis thaliana]

Found in search of C:\Documents and Settings\schen\Desktop\MengMeng\500ug Prep gel Plate 2\1913.wiff

Nominal mass ( $M_r$ ): 37754; Calculated pI value: 6.02

NCBI BLAST search of [gi|18406430](#) against nr

Unformatted [sequence string](#) for pasting into other applications

Taxonomy: [Arabidopsis thaliana](#)

Links to retrieve other entries containing this sequence from NCBI Entrez:

[gi|20197071](#) from [Arabidopsis thaliana](#)

[gi|21536558](#) from [Arabidopsis thaliana](#)

[gi|26452703](#) from [Arabidopsis thaliana](#)

[gi|30793829](#) from [Arabidopsis thaliana](#)

Fixed modifications: Carbamidomethyl (C)

Variable modifications: Oxidation (M), CyDye-Cy3 (C), CyDye-Cy5 (C), Oxidation (C)

Cleavage by Trypsin: cuts C-term side of KR unless next residue is P

Sequence Coverage: 5%

Matched peptides shown in **Red**

```
1 MATNGLMASS SVFLHRPRIA FASRTNQTVG KYGKGRVSFM GIGTRRLPVV
51 LSMTAMADSG EEAVKSVLPG NGISIMVNGC SGKMGRKAVIK AADSAGVNIV
101 PISFGSAGED GQRVEVCCKE ITVHGPTERE KVLSSVFEKH PELIVVDYTI
151 PSAVNDNAEL YSKVGVPFVM GTTGGDRNKL YETVEEAKIY AVISPQMGKQ
201 VVAFLAAMEI MAEQFPGAFS GYSLDVMESH QASKLDASGT AKAVISCFQE
251 LGVSYDMDQI QLIRDPKQQV EMVGVPEEHI SGHAFHLYHL TSPDETVSFE
301 FQHNVCGRSI YAEGTVDAVL FLAKKIRLKA DQRIYNMIDV LREGNMR
```

| Start - End | Observed | Mr(expt)  | Mr(calc)  | Delta   | Miss | Sequence                                                        |
|-------------|----------|-----------|-----------|---------|------|-----------------------------------------------------------------|
| 189 - 199   | 611.7644 | 1221.5142 | 1221.6427 | -0.1285 | 0    | K.IYAVISPQMGK.Q Oxidation (M) ( <a href="#">Ions score 25</a> ) |
| 334 - 342   | 576.7735 | 1151.5325 | 1151.6009 | -0.0684 | 0    | R.IYNMIDVLR.E Oxidation (M) ( <a href="#">Ions score 45</a> )   |

# gi|2494843 Putative lactoylglutathione lyase (Methylglyoxalase)

## Protein View

Match to: gi|2494843 Score: 58

Putative lactoylglutathione lyase (Methylglyoxalase) (Aldoketomutase) (Glyoxalase I) (Glx I) (Ketone-aldehyde mutase)

Found in search of C:\Documents and Settings\schen\Desktop\MengMeng\wiff files\26\A10 2111.wiff

Nominal mass (M<sub>r</sub>): 31740; Calculated pI value: 5.19

NCBI BLAST search of [gi|2494843](#) against nr

Unformatted [sequence string](#) for pasting into other applications

Taxonomy: [Brassica oleracea var. gemmifera](#)

Links to retrieve other entries containing this sequence from NCBI Entrez:

[gi|1469221](#) from [Brassica oleracea var. gemmifera](#)

Fixed modifications: Carbamidomethyl (C)

Variable modifications: Oxidation (M), CyDye-Cy3 (C), CyDye-Cy5 (C), Oxidation (C)

Cleavage by Trypsin: cuts C-term side of KR unless next residue is P

Sequence Coverage: 7%

Matched peptides shown in **Bold Red**

```
1 MAENADLVEW PKKDKRRFLH VVYRVGDLDR TIQFYTECFG MKVLRKRDVP
51 EEKYSNAFLG FGPETSNFVV ELTYNYGVSS YDIGTGFGHF AISTQDVSKM
101 VEAVRAKGGN VTREPGPVKG GGSVIAFVKD PDGYTFELIQ RGPTPEPLCQ
151 VMLRVGDLDR AVKFMEKALG MRLLRRIERP EYNTIGMMGY AEEYESIVLE
201 LTNYNYGVTEY TKGNAQAQIA IGTDDVYKSA EVVKIVNQEL GKGITREAGP
251 LPGLGTKIVS FLDPDGWKQV LVDNEDFLKE LE
```

| Start - End | Observed | Mr (expt) | Mr (calc) | Delta   | Miss | Sequence        |                                   |
|-------------|----------|-----------|-----------|---------|------|-----------------|-----------------------------------|
| 120 - 129   | 467.7795 | 933.5445  | 933.5284  | 0.0161  | 0    | K.GGGSVIAFVK.D  | ( <a href="#">Ions score 22</a> ) |
| 247 - 257   | 520.2441 | 1038.4737 | 1038.5710 | -0.0973 | 0    | R.EAGPLPGLGTK.I | ( <a href="#">Ions score 36</a> ) |

# gi|2499441 Proliferating cell nuclear antigen (PCNA)

## Protein View

Match to: gi|2499441 Score: 62

Proliferating cell nuclear antigen (PCNA)

Found in search of C:\Documents and Settings\schen\Desktop\MengMeng\A8 2106.wiff

Nominal mass ( $M_r$ ): 29375; Calculated pI value: 4.61

NCBI BLAST search of [gi|2499441](#) against nr

Unformatted [sequence string](#) for pasting into other applications

Taxonomy: [Brassica napus](#)

Links to retrieve other entries containing this sequence from NCBI Entrez:

[gi|408232](#) from [Brassica napus](#)

Fixed modifications: Carbamidomethyl (C)

Variable modifications: Oxidation (M), CyDye-Cy3 (C), CyDye-Cy5 (C), Oxidation (C)

Cleavage by Trypsin: cuts C-term side of KR unless next residue is P

Sequence Coverage: 5%

Matched peptides shown in **Bold Red**

```
1 MLELRLVQGS LLKKVLESIK DLVNDANFDC STTGFSLQAM DSSHVALVSL
51 LLRSEGFEHY RCDRNLSMGM NLGNMSKMLK CAGNDDIITI KADDGGDTVT
101 FMFESPKQDK IADFEMKLMD IDSEHLGIPD AEYHSIVRMP SNEFSRICKD
151 LSTIGDTVVI SVTKEGVKFS TAGDIGTANI VLRQNTTVDK PEDAIVIEMN
201 EPVSLSFALR YMNSFTKATP LSDTVITISLS SELPVVVEYK VAEMGYIRYY
251 LAPKIEEDEE DKA
```

| Start - End | Observed | Mr(expt) | Mr(calc) | Delta  | Miss | Sequence     |                                                 |
|-------------|----------|----------|----------|--------|------|--------------|-------------------------------------------------|
| 139 - 146   | 492.2267 | 982.4389 | 982.4178 | 0.0211 | 0    | R.MPSNEFSR.I | Oxidation (M) ( <a href="#">Ions score 29</a> ) |
| 211 - 217   | 453.7513 | 905.4881 | 905.3953 | 0.0928 | 0    | R.YMNSFTK.A  | Oxidation (M) ( <a href="#">Ions score 33</a> ) |

# gi|2501812 Glycolate oxidase

## Protein View

Match to: gi|2501812 Score: 84

glycolate oxidase [Arabidopsis thaliana]

Found in search of C:\Documents and Settings\schen\Desktop\MengMeng\500ug Prep gel Plate 2\D11 1762.wiff

Nominal mass ( $M_r$ ): 28165; Calculated pI value: 9.52

NCBI BLAST search of [gi|2501812](#) against nr

Unformatted [sequence string](#) for pasting into other applications

Taxonomy: [Arabidopsis thaliana](#)

Fixed modifications: Carbamidomethyl (C)

Variable modifications: Oxidation (M), CyDye-Cy3 (C), CyDye-Cy5 (C), Oxidation (C)

Cleavage by Trypsin: cuts C-term side of KR unless next residue is P

Sequence Coverage: 6%

Matched peptides shown in **Bold Red**

```
1 ATSSVEKIAS TGP GIRFFQL YVYK NRKVVE QLV RKA EKAG FKAIALTVNT
51 PRLGPKKSDI KNRFTLPPNL TLKNFEGLDL GKMDEANDSG LASV VAGQID
101 RTL SWKDIQW LQTITNMPIL VKG VLTGEDA RIAIQAGAAG IIVSNHGARQ
151 LDYVPATISA LEEVVKATQG GVPVFLDGGV RRGTDVFKAL ALGTSGIFIG
201 RPVV FALAAE GEAGVKKVLQ MLRDEFELTM ALSGCRSISE ITRNHIVTEW
251 DIPRHL PRL
```

| Start - End | Observed | Mr (expt) | Mr (calc) | Delta  | Miss | Sequence                                        |
|-------------|----------|-----------|-----------|--------|------|-------------------------------------------------|
| 28 - 34     | 422.2210 | 842.4274  | 841.5022  | 0.9253 | 0    | K.VVEQLVR.K ( <a href="#">Ions score 44</a> )   |
| 74 - 82     | 496.7563 | 991.4981  | 991.4975  | 0.0006 | 0    | K.NFEGLDLGK.M ( <a href="#">Ions score 40</a> ) |

# gi|414550 Cytosolic triose phosphate isomerase

## Protein View

Match to: gi|414550 Score: 118

cytosolic triose phosphate isomerase

Found in search of C:\Documents and Settings\schen\Desktop\MengMeng\wiff files\C1 2227.wiff

Nominal mass ( $M_r$ ): 27366; Calculated pI value: 5.24

NCBI BLAST search of [gi|414550](#) against nr

Unformatted [sequence string](#) for pasting into other applications

Taxonomy: [Arabidopsis thaliana](#)

Links to retrieve other entries containing this sequence from NCBI Entrez:

[gi|742408](#) from [Arabidopsis thaliana](#)

Fixed modifications: Carbamidomethyl (C)

Variable modifications: Oxidation (M), Phospho (ST), CyDye-Cy3 (C), CyDye-Cy5 (C), Oxidation (C)

Cleavage by Trypsin: cuts C-term side of KR unless next residue is P

Sequence Coverage: 12%

Matched peptides shown in **Bold Red**

```
1 MARKFFVGGN WKCNGTAEV KKIVNTLNEA QVPSQDVVEV VVSPPYVFLP
51 LVKSTLRSDF FVAAQNCWVK KGGFTGEVS AEMLVNLDIP WVILGHSERR
101 AILNESSEFV GDKVAYALAQ GLKVIACVGE TLEEREAGST MDVVAAQTKA
151 IADRVTNWSN VVIAYEPVWA IGTGKVASPA QAQEVHDELK KWLAKNVSAD
201 VAATTRIIYG GSVNGGNCKE LGGQADVDGF LVGGASLKPE FIDIKAAEV
251 NKSA
```

| Start - End | Observed | Mr(expt)  | Mr(calc)  | Delta   | Miss | Sequence                                                                   |
|-------------|----------|-----------|-----------|---------|------|----------------------------------------------------------------------------|
| 5 - 12      | 477.8052 | 953.5959  | 953.4760  | 0.1199  | 0    | K. <b>FFVGGNWK.C</b> ( <a href="#">Ions score 21</a> )                     |
| 136 - 149   | 712.3133 | 1422.6121 | 1422.6661 | -0.0540 | 0    | R. <b>EAGSTMDVVAAQTK.A</b> Oxidation (M) ( <a href="#">Ions score 53</a> ) |
| 196 - 206   | 552.7565 | 1103.4984 | 1103.5571 | -0.0587 | 0    | K. <b>NVSADVAATTR.I</b> ( <a href="#">Ions score 44</a> )                  |

# gi|99805 Enoyl-[acyl-carrier-protein] reductase (NADH2) precursor

## Protein View

Match to: gi|99805 Score: 67

enoyl-[acyl-carrier-protein] reductase (NADH2) (EC 1.3.1.9) precursor - rape

Found in search of C:\Documents and Settings\schen\Desktop\MengMeng\500ug Prep gel Plate 2\2016.wiff

Nominal mass ( $M_r$ ): 40633; Calculated pI value: 8.93

NCBI BLAST search of [gi|99805](#) against nr

Unformatted [sequence string](#) for pasting into other applications

Taxonomy: [Brassica napus](#)

Fixed modifications: Carbamidomethyl (C)

Variable modifications: Oxidation (M), CyDye-Cy3 (C), CyDye-Cy5 (C), Oxidation (C)

Cleavage by Trypsin: cuts C-term side of KR unless next residue is P

Sequence Coverage: 5%

Matched peptides shown in **Bold Red**

```
1 MAATAAASSL QMATRPSIS AASSKARTYV VGANPRNAYK IACTPHLSNL
51 GCLRNSALP ASKKSFSFST KAMSESSESK ASSGLPIDLR GKRAFIAGIA
101 DDNGYGWAVA KSLAAAGAEI LVGTWVPALN IFETSLRRGK FDQSRVLPDG
151 SLMEIKKVYP LDAVFDNPED VPEDVKANKR YAGSSNWTVQ HAAECVRQDF
201 GSIDILVHSL ANGPEVSKPL LETSRKGYLA AISASSYSFV SLLSHFLPIM
251 NPGGASISLT YIASERIIPG YGGMSSAKA ALES DTRVLA FEAGRKQNI R
301 VNTISAGPLG SRAAKAIGFI DTMIEYSYNN APIQKTLTAD EVGNAAAFLV
351 SPLASAITGA TIYVDNGLNS MGVALDSPVF KDLNK
```

| Start - End | Observed | Mr(expt)  | Mr(calc)  | Delta   | Miss | Sequence                                                  |
|-------------|----------|-----------|-----------|---------|------|-----------------------------------------------------------|
| 81 - 90     | 514.7229 | 1027.4312 | 1027.5662 | -0.1350 | 0    | <b>K.ASSGLPIDLR.G</b> ( <a href="#">Ions score 18</a> )   |
| 301 - 312   | 586.2406 | 1170.4666 | 1170.6357 | -0.1691 | 0    | <b>R.VNTISAGPLGSR.A</b> ( <a href="#">Ions score 49</a> ) |



# gi|780814 3-ketoacyl-acyl carrier protein synthase I

## Protein View

Match to: gi|780814 Score: 52

3-ketoacyl-acyl carrier protein synthase I

Found in search of C:\Documents and Settings\schen\Desktop\MengMeng\0226 PLATE1 10SAMPLES\H1 1431.wiff

Nominal mass ( $M_r$ ): 50890; Calculated pI value: 7.99

NCBI BLAST search of [gi|780814](#) against nr

Unformatted [sequence string](#) for pasting into other applications

Taxonomy: [Arabidopsis thaliana](#)

Fixed modifications: Carbamidomethyl (C)

Variable modifications: Oxidation (M), CyDye-Cy3 (C), CyDye-Cy5 (C), Oxidation (C)

Cleavage by Trypsin: cuts C-term side of KR unless next residue is P

Sequence Coverage: 2%

Matched peptides shown in **Bold Red**

```
1 MQALQSSSLR ASPPNPLRLP SNRQSHQLIT NARPLRRQQR SFISASASTV
51 SAPKRETDPK KRVVITGMGL VSVCNDVDA YYEKLLSGES GISLIDRFDA
101 SKFPTRFGGQ IRGFSSEGYI DGKNERRLDD CLKYCIVAGK KALESANLGG
151 DKLNTIDKRK AGVLVGTGMG GLTVFSEGVQ NLIEKGHRI SPFFIPYAIT
201 NMGSALLAID LGLMGPNYSI STACATSNYC FYAAANHNHR GEADMMIAGG
251 TEAAIPIGL GGFVACRALS QRNDPQTAS RPWDKARDGF VMGEGAGVLV
301 MESLEHAMKR GAPIVAEYLG GAVNCDAHMH TDPRADGLGV SSCIERCLED
351 AGVSPEEVNY INAHATSTLA GDLAEINAIK KVFKSTSGIK INATKSMIGH
401 CLGAAGGLEA IATVKAIN TG WLHPSINQFN PEQAVDFDTV PNEKKQHEVD
451 VAISNSFGFG GHNSVVAFSA FKP
```

| Start - End | Observed | Mr(expt)  | Mr(calc)  | Delta  | Miss | Sequence                                                    |
|-------------|----------|-----------|-----------|--------|------|-------------------------------------------------------------|
| 113 - 123   | 580.2990 | 1158.5835 | 1158.5193 | 0.0642 | 0    | <b>R.GFSSEGYIDGK.N</b> ( <a href="#">Ions score 20</a> )    |
| 113 - 126   | 520.2567 | 1557.7483 | 1557.7059 | 0.0424 | 1    | <b>R.GFSSEGYIDGKNER.R</b> ( <a href="#">Ions score 24</a> ) |

# gi|1170506 Eukaryotic initiation factor 4A-2

## Protein View

Match to: gi|1170506 Score: 95

Eukaryotic initiation factor 4A-2 (ATP-dependent RNA helicase eIF4A-2) (eIF-4A-2)

Found in search of C:\Documents and Settings\schen\Desktop\MengMeng\FEB22 500UG PREP PLATE1\G7 1351.wiff

Nominal mass ( $M_r$ ): 47084; Calculated pI value: 5.38

NCBI BLAST search of [gi|1170506](#) against nr

Unformatted [sequence string](#) for pasting into other applications

Taxonomy: [Nicotiana plumbaginifolia](#)

Links to retrieve other entries containing this sequence from NCBI Entrez:

[gi|19697](#) from [Nicotiana plumbaginifolia](#)

Fixed modifications: Carbamidomethyl (C)

Variable modifications: Oxidation (M),CyDye-Cy3 (C),CyDye-Cy5 (C),Oxidation (C)

Cleavage by Trypsin: cuts C-term side of KR unless next residue is P

Sequence Coverage: 8%

Matched peptides shown in **Bold Red**

```
1 MAGSAPEGSQ FDARQFDAMK TELLGTEQEE FFTSYDEVYD SFDAMGLQEN
51 LLRGIYAYGF EKPSAIQQRG IVPFCKGLDV IQQAQSGTGK TATFCSGVLQ
101 QLDYSLVECQ ALVLAPTREL AQQIEKVMRA LGDYLGVKVH ACVGGTSVRE
151 DQRILQSGVH VVVGTPGRVF DMLRRQSLRP DHIKMFVLDE ADEMLSRGFK
201 DQIYDIFQLL PPKIQGVVFS ATMPPEALEI TRKFMNKPVR ILVKRDELTL
251 EGIKQFYVNV DKEEWKLETL CDLYETLAIT QSVIFVNTRR KVDWLTDKMR
301 SRDHTVSATH GDMDQNTRDI IMREFRSGSS RVLITDILLA RGIDVQQVSL
351 VINYLPTQP ENYLHRIGRS GRFGRKGVAI NSVTKDDERM LFDIQKFYNV
401 VIEELPANVA DLL
```

| Start - End | Observed | Mr(expt)  | Mr(calc)  | Delta   | Miss | Sequence                                                              |
|-------------|----------|-----------|-----------|---------|------|-----------------------------------------------------------------------|
| 54 - 69     | 609.9623 | 1826.8652 | 1826.9315 | -0.0663 | 0    | <b>R.GIYAYGF</b> <b>EKPSAIQQR.G</b> ( <a href="#">Ions score 30</a> ) |
| 77 - 90     | 701.3292 | 1400.6439 | 1400.7260 | -0.0820 | 0    | <b>K.GLDVI</b> <b>IQQAQSGTGK.T</b> ( <a href="#">Ions score 42</a> )  |
| 390 - 396   | 455.7603 | 909.5061  | 909.4630  | 0.0431  | 0    | <b>R.MLFDIQK.F</b> Oxidation (M) ( <a href="#">Ions score 23</a> )    |

# gi|41352683 Putative proteasome 20S beta1 subunit

## Protein View

Match to: gi|41352683 Score: 110

putative proteasome 20S beta1 subunit [Brassica napus]

Found in search of C:\Documents and Settings\schen\Desktop\MengMeng\F11 2434.wiff

Nominal mass ( $M_r$ ): 19000; Calculated pI value: 7.71

NCBI BLAST search of [gi|41352683](#) against nr

Unformatted [sequence string](#) for pasting into other applications

Taxonomy: [Brassica napus](#)

Fixed modifications: Carbamidomethyl (C)

Variable modifications: Oxidation (M), CyDye-Cy3 (C), CyDye-Cy5 (C), Oxidation (C)

Cleavage by Trypsin: cuts C-term side of KR unless next residue is P

Sequence Coverage: 14%

Matched peptides shown in **Bold Red**

```
1 TSTGMYVANR ASDKITQLTD NVYVCRSGSA ADSQVSDYV RYFLHQHTIQ
51 LGQPATVKVS ANLIRMLAYN NKNMLQTGLI VGGWDKYEGG KIYGIPLGGT
101 VVEQPFAIGG SGSSYLYGFF DQAWKENMTK EEAEQLVVKA VSLAIARDGA
151 SGGVVRTVII NSEGVTRNFY PGDKL
```

| Start - End      | Observed        | Mr(expt)         | Mr(calc)         | Delta          | Miss     | Sequence                                                    |
|------------------|-----------------|------------------|------------------|----------------|----------|-------------------------------------------------------------|
| <b>27 - 41</b>   | <b>770.8111</b> | <b>1539.6076</b> | <b>1539.7165</b> | <b>-0.1089</b> | <b>0</b> | <b>R.SGSAADSQVSDYVR.Y</b> ( <a href="#">Ions score 52</a> ) |
| <b>157 - 167</b> | <b>594.8033</b> | <b>1187.5921</b> | <b>1187.6510</b> | <b>-0.0589</b> | <b>0</b> | <b>R.TVIINSEGVTR.N</b> ( <a href="#">Ions score 58</a> )    |

# gi|147801436 Hypothetical protein, containing elongation factor 1 domain

## Protein View

Match to: gi|147801436 Score: 74

hypothetical protein [Vitis vinifera]

Found in search of C:\Documents and Settings\schen\Desktop\MengMeng\9\H10 1421.wiff

Nominal mass ( $M_r$ ): 59829; Calculated pI value: 6.66

NCBI BLAST search of [gi|147801436](#) against nr

Unformatted [sequence string](#) for pasting into other applications

Taxonomy: [Vitis vinifera](#)

Fixed modifications: Carbamidomethyl (C)

Variable modifications: Oxidation (M), CyDye-Cy3 (C), CyDye-Cy5 (C), Oxidation (C)

Cleavage by Trypsin: cuts C-term side of KR unless next residue is P

Sequence Coverage: 1%

Matched peptides shown in **Bold Red**

```
1 MEDCRPPFGA PSFLSFFAAH LPAGRLFESQ VLPPGWLLWN QLSGIDGRMR
51 KRHQVGGYAE DSESVMEGAL AAGTFEDKRD FQMSMNLGGC VGHMGIKSTQ
101 QEIIVGQAST SPGISGQIIQ KSMCLSLLVK GLLGKWPYES QVGPSKTVWA
151 EEDEHRVTRA HMGVASEGND DYGTPPFNVE QLVSLHGKTT LTAAITRVLA
201 EEGKAKVVAL DEIDKAPKEK KRGITIATTH IEYETAKRHC DHVDCPGHAD
251 YVKNMITGAA QMDGSIQETH SSCVPEMEFR ELLSFYEFPG DEIPVIRGSA
301 ICVLQGTHEE MRKQGCCTVA IGRAEQGTIE VGEDLRIWRG TSALAEHMRW
351 KIAARRNQTV IWVKPLTSDC CIKKGTLVLN LHSTDLMVVR MLCGMLPNGT
401 LAQLLHDSTK ISEYEPDWLT RLTIATGVAE GLAFLHHADY DMVLGVLYRH
451 LSCLQDIVTA VGRLRPIEPL RQVTIRLRPP FDQLDKRSGK ERKSFCTLRL
501 VELNRLVGSS SGSIGWAVFG STTILFNLKP FKQQV
```

| Start - End | Observed | Mr (expt) | Mr (calc) | Delta  | Miss | Sequence               |                                   |
|-------------|----------|-----------|-----------|--------|------|------------------------|-----------------------------------|
| 189 - 197   | 474.2925 | 946.5704  | 946.5447  | 0.0257 | 0    | K.TTL <b>TAAITR</b> .V | ( <a href="#">Ions score 74</a> ) |

MS/MS Fragmentation of **TTLTAAITR**

Found in **gi|147801436**, hypothetical protein [Vitis vinifera]

| #        | <b>b</b>        | <b>b<sup>++</sup></b> | <b>b<sup>0</sup></b> | <b>b<sup>0++</sup></b> | Seq.     | <b>y</b>        | <b>y<sup>++</sup></b> | <b>y<sup>*</sup></b> | <b>y<sup>*++</sup></b> | <b>y<sup>0</sup></b> | <b>y<sup>0++</sup></b> | #        |
|----------|-----------------|-----------------------|----------------------|------------------------|----------|-----------------|-----------------------|----------------------|------------------------|----------------------|------------------------|----------|
| <b>1</b> | 102.0550        | 51.5311               | 84.0444              | 42.5258                | <b>T</b> |                 |                       |                      |                        |                      |                        | <b>9</b> |
| <b>2</b> | <b>203.1026</b> | 102.0550              | <b>185.0921</b>      | 93.0497                | <b>T</b> | <b>846.5043</b> | 423.7558              | 829.4778             | 415.2425               | 828.4938             | 414.7505               | <b>8</b> |
| <b>3</b> | 316.1867        | <b>158.5970</b>       | <b>298.1761</b>      | 149.5917               | <b>L</b> | <b>745.4567</b> | 373.2320              | 728.4301             | 364.7187               | 727.4461             | 364.2267               | <b>7</b> |
| <b>4</b> | 417.2344        | 209.1208              | 399.2238             | 200.1155               | <b>T</b> | <b>632.3726</b> | 316.6899              | 615.3461             | 308.1767               | 614.3620             | 307.6847               | <b>6</b> |
| <b>5</b> | 488.2715        | 244.6394              | 470.2609             | 235.6341               | <b>A</b> | <b>531.3249</b> | 266.1661              | 514.2984             | 257.6528               | 513.3144             | 257.1608               | <b>5</b> |
| <b>6</b> | 559.3086        | 280.1579              | 541.2980             | 271.1527               | <b>A</b> | <b>460.2878</b> | 230.6475              | 443.2613             | 222.1343               | 442.2772             | 221.6423               | <b>4</b> |
| <b>7</b> | 672.3927        | 336.7000              | 654.3821             | 327.6947               | <b>I</b> | <b>389.2507</b> | 195.1290              | 372.2241             | <b>186.6157</b>        | 371.2401             | 186.1237               | <b>3</b> |
| <b>8</b> | 773.4403        | 387.2238              | 755.4298             | 378.2185               | <b>T</b> | <b>276.1666</b> | 138.5870              | 259.1401             | 130.0737               | 258.1561             | 129.5817               | <b>2</b> |
| <b>9</b> |                 |                       |                      |                        | <b>R</b> | <b>175.1190</b> | 88.0631               | 158.0924             | 79.5498                |                      |                        | <b>1</b> |

# gi|15218090 Mitochondrial processing peptidase alpha subunit

## Protein View

Match to: gi|15218090 Score: 81

mitochondrial processing peptidase alpha subunit, putative [Arabidopsis thaliana]

Found in search of C:\Documents and Settings\schen\Desktop\MengMeng\FEB22 500UG PREP PLATE1\G7 1351.wiff

Nominal mass ( $M_r$ ): 54539; Calculated pI value: 5.94

NCBI BLAST search of [gi|15218090](#) against nr

Unformatted [sequence string](#) for pasting into other applications

Taxonomy: [Arabidopsis thaliana](#)

Links to retrieve other entries containing this sequence from NCBI Entrez:

[gi|29839695](#) from [Arabidopsis thaliana](#)

[gi|4220446](#) from [Arabidopsis thaliana](#)

[gi|17529270](#) from [Arabidopsis thaliana](#)

[gi|20258957](#) from [Arabidopsis thaliana](#)

Fixed modifications: Carbamidomethyl (C)

Variable modifications: Oxidation (M), CyDye-Cy3 (C), CyDye-Cy5 (C), Oxidation (C)

Cleavage by Trypsin: cuts C-term side of KR unless next residue is P

Sequence Coverage: 3%

Matched peptides shown in **Bold Red**

```
1 MYRTAASRAR ALKGVLTRSL RPARYASSSA VAETSSSTPA YLSWLSGGSR
51 AALTSLDMPL QGVSLPPPLA DKVEPSKLQI TTLPNGLKIA SETTPNPAAS
101 IGLYVDCGSI YEAPYFHGAT HLLERMAFKS TLNRTHFRLV REIEAIGGNT
151 SASASREQMS YTIDALKTYV PEMVEVLIDS VRNPAFLDWE VNEELRKMKV
201 EIAELAKNPM GFLLEAIHSA GYSGPLASPL YAPESALDRL NGELLEEFMT
251 ENFTAARMVL AASGVEHEEL LKVAEPLTSD LPNVPPQLAP KSQYVGGDFR
301 QHTGGEATHF AVAFEVPGWN NEKEAVTATV LQMLMGGGGS FSAGGPGKGM
351 HSWLYRRVLN EYQEVQSCTA FTSIFNDTGL FGIYGCSSPQ FAKAIELAA
401 KELKDVAGGK VNQAHLDRAK AATKSAVLMN LESRMIAAED IGRQILTYGE
451 RKPVDQFLKS VDQLTLKDIA DFTSKVISKP LTMGSFGDVL AVPSYDTISS
501 KFR
```

| Start - End | Observed | Mr(expt)  | Mr(calc)  | Delta   | Miss | Sequence              |                                                 |
|-------------|----------|-----------|-----------|---------|------|-----------------------|-------------------------------------------------|
| 425 - 434   | 568.2810 | 1134.5475 | 1134.5703 | -0.0228 | 0    | <b>K.SAVLMNLESR.M</b> | Oxidation (M) ( <a href="#">Ions score 58</a> ) |
| 435 - 443   | 496.2299 | 990.4452  | 990.4804  | -0.0352 | 0    | <b>R.MIAAEDIGR.Q</b>  | Oxidation (M) ( <a href="#">Ions score 24</a> ) |

# gi|510880 Putative aspartic protease

## Protein View

Match to: gi|510880 Score: 51

putative aspartic protease [Brassica oleracea]

Found in search of C:\Documents and Settings\schen\Desktop\MengMeng\500ug Prep gel Plate 2\H12 2051.wiff

Nominal mass ( $M_r$ ): 28008; Calculated pI value: 8.34

NCBI BLAST search of [gi|510880](#) against nr

Unformatted [sequence string](#) for pasting into other applications

Taxonomy: [Brassica oleracea](#)

Fixed modifications: Carbamidomethyl (C)

Variable modifications: Oxidation (M), CyDye-Cy3 (C), CyDye-Cy5 (C), Oxidation (C)

Cleavage by Trypsin: cuts C-term side of KR unless next residue is P

Sequence Coverage: 3%

Matched peptides shown in **Bold Red**

```
1 MGIYSKPVAV SLIVSFLFL SASAERN DGT FRVGLK LKL DRKSRIAARV
51 GSKQLKPLRG YLGLDSDAD IVTLKNYLD A QYYGEIAIGT PPQKFTVVFD
101 TGSSNLWVPS SKCYFSIACL FHSKYKSSRS STYEKNGKSA AIHYGTGAIA
151 GFFSNDAVTV GDLVVKDQEF IEATKEPGIT FVLAKFDGIL GLGFQEISVG
201 NAAPVWYNML KQGLYKEPVF SFWLN RNAED EEGGELVFGG VDPNHYKGEH
251 IYVPV
```

Show predicted peptides also

Sort Peptides By

Residue Number  Increasing Mass  Decreasing Mass

| Start - End | Observed | Mr(expt)  | Mr(calc)  | Delta  | Miss | Sequence      |                                   |
|-------------|----------|-----------|-----------|--------|------|---------------|-----------------------------------|
| 167 - 175   | 540.7669 | 1079.5192 | 1079.5135 | 0.0057 | 0    | K.DQEFIEATK.E | ( <a href="#">Ions score 51</a> ) |

MS/MS Fragmentation of **DQEFIEATK**

Found in **gi510880**, putative aspartic protease [Brassica oleracea]

| # | b               | b <sup>++</sup> | b*              | b <sup>*++</sup> | b <sup>0</sup>  | b <sup>0++</sup> | Seq.     | y               | y <sup>++</sup> | y*              | y <sup>*++</sup> | y <sup>0</sup>  | y <sup>0++</sup> | # |
|---|-----------------|-----------------|-----------------|------------------|-----------------|------------------|----------|-----------------|-----------------|-----------------|------------------|-----------------|------------------|---|
| 1 | 116.0342        | 58.5207         |                 |                  | 98.0237         | 49.5155          | <b>D</b> |                 |                 |                 |                  |                 |                  | 9 |
| 2 | <b>244.0928</b> | 122.5500        | 227.0662        | 114.0368         | <b>226.0822</b> | 113.5448         | <b>Q</b> | 965.4938        | 483.2506        | 948.4673        | 474.7373         | 947.4833        | 474.2453         | 8 |
| 3 | <b>373.1354</b> | 187.0713        | <b>356.1088</b> | 178.5581         | 355.1248        | 178.0661         | <b>E</b> | <b>837.4353</b> | 419.2213        | 820.4087        | 410.7080         | <b>819.4247</b> | 410.2160         | 7 |
| 4 | 520.2038        | 260.6055        | 503.1773        | 252.0923         | 502.1932        | 251.6003         | <b>F</b> | <b>708.3927</b> | 354.7000        | 691.3661        | 346.1867         | 690.3821        | 345.6947         | 6 |
| 5 | 633.2879        | 317.1476        | 616.2613        | 308.6343         | 615.2773        | 308.1423         | <b>I</b> | <b>561.3243</b> | 281.1658        | 544.2977        | 272.6525         | 543.3137        | 272.1605         | 5 |
| 6 | 762.3305        | 381.6689        | 745.3039        | <b>373.1556</b>  | 744.3199        | 372.6636         | <b>E</b> | <b>448.2402</b> | 224.6237        | 431.2136        | 216.1105         | 430.2296        | 215.6185         | 4 |
| 7 | 833.3676        | 417.1874        | 816.3410        | 408.6742         | 815.3570        | 408.1821         | <b>A</b> | <b>319.1976</b> | 160.1024        | 302.1710        | 151.5892         | 301.1870        | 151.0972         | 3 |
| 8 | 934.4153        | 467.7113        | 917.3887        | 459.1980         | 916.4047        | 458.7060         | <b>T</b> | <b>248.1605</b> | 124.5839        | 231.1339        | 116.0706         | 230.1499        | <b>115.5786</b>  | 2 |
| 9 |                 |                 |                 |                  |                 |                  | <b>K</b> | 147.1128        | 74.0600         | <b>130.0863</b> | 65.5468          |                 |                  | 1 |



# gi|127733 Myrosinase precursor

## Protein View

Match to: gi|127733 Score: 330

Myrosinase precursor (Sinigrinase) (Thioglucosidase)

Found in search of C:\Documents and Settings\schen\Desktop\MengMeng\0226 PLATE1 10SAMPLES\C3 778.wiff

Nominal mass ( $M_r$ ): 63266; Calculated pI value: 6.62

NCBI BLAST search of [gi|127733](#) against nr

Unformatted [sequence string](#) for pasting into other applications

Taxonomy: [Brassica napus](#)

Links to retrieve other entries containing this sequence from NCBI Entrez:

[gi|22595](#) from [Brassica napus](#)

Fixed modifications: Carbamidomethyl (C)

Variable modifications: Oxidation (M), CyDye-Cy3 (C), CyDye-Cy5 (C), Oxidation (C)

Cleavage by Trypsin: cuts C-term side of KR unless next residue is P

Sequence Coverage: 14%

Matched peptides shown in **Bold Red**

```
1 MKLLHGLALV FLLAAASCKA DEEITCEENN PFTCSNTDIL SSKNFGKDFI
51 FGVASSAYQI EGGGRGRGVNV WDGFSHRYPE KAGSDLKNGD TTCESYTRWQ
101 KDVDVMGELN ATGYRFSFAW SRIIPK GKVS RGVNQGLDY YHKLIDALLE
151 KNITPFVTLF HWDLPQTLQD EYEGFLDRQI IQDFKDYADL CFKEFGGKVK
201 HWITINQLYT VPTRGYAIGT DAPGRCSPMV DTKHRCYGGN SSTEPYIVAH
251 NQLLAHATVV DLYRKYKFQ KGKIGPVMIT RWFLPFDES PASIEAAERM
301 NQFFHWYME PLTKGRYPDI MRQIVGSRLP NFTEEEAELV AGSYDFLGLN
351 YYVTQYAQPK PNPYPSEHT AMMDAGVKLT YDNSRGEFLG PLFVEDKVN
401 NSYYYPKGIY YVMDYFKTKY GDPLIYVTEN GFSTPSEN EQAIADYKRI
451 DYLCSHLCFL RRVIKEGVN VRGYFAWALG DNYEFCKGFT VRFGLSYVNW
501 EDLDDRNLKE SGKWYQRFIN GTVKNVAVKQD FLRSSLSSQS QKKRFADA
```

| Start | End | Observed | Mr (expt) | Mr (calc) | Delta   | Miss | Sequence                                                             |
|-------|-----|----------|-----------|-----------|---------|------|----------------------------------------------------------------------|
| 44    | 64  | 755.0270 | 2262.0590 | 2262.1069 | -0.0479 | 1    | <b>K.NFGKDFIFGVASSAYQIEGGR.G</b> ( <a href="#">Ions score 34</a> )   |
| 116   | 122 | 450.7514 | 899.4883  | 899.4290  | 0.0593  | 0    | <b>R.FSFAWSR.I</b> ( <a href="#">Ions score 32</a> )                 |
| 179   | 185 | 446.2469 | 890.4792  | 890.4862  | -0.0070 | 0    | <b>R.QIIQDFK.D</b> ( <a href="#">Ions score 35</a> )                 |
| 215   | 225 | 539.2561 | 1076.4977 | 1076.5251 | -0.0274 | 0    | <b>R.GYAIGTDAPGR.C</b> ( <a href="#">Ions score 54</a> )             |
| 274   | 281 | 451.7541 | 901.4936  | 901.5055  | -0.0119 | 0    | <b>K.IGPVMITR.W</b> Oxidation (M) ( <a href="#">Ions score 67</a> )  |
| 317   | 322 | 405.6933 | 809.3720  | 809.3742  | -0.0021 | 0    | <b>R.YPDIMR.Q</b> Oxidation (M) ( <a href="#">Ions score 24</a> )    |
| 408   | 417 | 657.3498 | 1312.6850 | 1313.6002 | -0.9152 | 0    | <b>K.GIYYVMDFK.T</b> Oxidation (M) ( <a href="#">Ions score 42</a> ) |
| 441   | 448 | 469.2432 | 936.4719  | 936.4552  | 0.0167  | 0    | <b>R.EQAIADYK.R</b> ( <a href="#">Ions score 46</a> )                |

# gi|14764532 Monodehydroascorbate reductase

## Protein View

Match to: gi|14764532 Score: 115

monodehydroascorbate reductase [Brassica rapa subsp. pekinensis]

Found in search of C:\Documents and Settings\schen\Desktop\MengMeng\FEB22 500UG PREP PLATE1\1370.wiff

Nominal mass ( $M_r$ ): 46604; Calculated pI value: 5.81

NCBI BLAST search of [gi|14764532](#) against nr

Unformatted [sequence string](#) for pasting into other applications

Taxonomy: [Brassica rapa subsp. pekinensis](#)

Fixed modifications: Carbamidomethyl (C)

Variable modifications: Oxidation (M), CyDye-Cy3 (C), CyDye-Cy5 (C), Oxidation (C)

Cleavage by Trypsin: cuts C-term side of KR unless next residue is P

Sequence Coverage: 10%

Matched peptides shown in **Bold Red**

```
1 MAEKSFKYII LGGVSAGYA AKEFASQGVK PGELAVISKE AVAPYERPAL
51 SKGYLFPEGA ARLPGFHCCV GSGGEKLLPE SYKQKIELI LSTEIVKADL
101 AAKSLVSAAG DVFKYETLII ATGSTVLRLT DFGVKGADSK NILYLREIDD
151 ADKVVEAIQA KKGKAVVVG GGYIGLELSA ALRINNFDTV MVFPEPWCOMP
201 RLFTADIAAF YETYYTNKGV KIIKGTVASG FTAHPNGEVN EVQLKDGRSL
251 EADIVIVGVG ARPLTALFKG QVEEDKGGIK TDAFFKTSVP DVYAVGDVAT
301 FPLKMYGDMR RVEHVDHSRK SAEQAVKAIK AAEGGGAVEE YDYLPFFYSR
351 SFDLSWQFYG DNVGDSVLFV DSNPSNPKPR FGAYWVQDGK VVGAFMEGGS
401 GDENKALAKV AKARPAESL EDLTKQGISF AAKI
```

| Start - End | Observed | Mr (expt) | Mr (calc) | Delta   | Miss | Sequence                                                                  |
|-------------|----------|-----------|-----------|---------|------|---------------------------------------------------------------------------|
| 23 - 39     | 587.3038 | 1758.8895 | 1758.9516 | -0.0621 | 0    | <b>K.EFASQG</b> VK <b>PGELAVISKE</b> .E ( <a href="#">Ions score 39</a> ) |
| 53 - 62     | 540.7732 | 1079.5319 | 1079.5400 | -0.0081 | 0    | <b>K.GYLFPEGA</b> AR.L ( <a href="#">Ions score 41</a> )                  |
| 287 - 304   | 627.2976 | 1878.8709 | 1877.9775 | 0.8934  | 0    | <b>K.TSVP</b> DVYAVGDVAT <b>FPLK</b> .M ( <a href="#">Ions score 37</a> ) |

# gi|18141281 Senescence-associated cysteine protease

## Protein View

Match to: gi|18141281 Score: 92

senescence-associated cysteine protease [Brassica oleracea]

Found in search of C:\Documents and Settings\schen\Desktop\MengMeng\wiff files\26\F7 2426.wiff

Nominal mass ( $M_r$ ): 49581; Calculated pI value: 5.49

NCBI BLAST search of [gi|18141281](#) against nr

Unformatted [sequence string](#) for pasting into other applications

Taxonomy: [Brassica oleracea](#)

Fixed modifications: Carbamidomethyl (C)

Variable modifications: Oxidation (M), CyDye-Cy3 (C), CyDye-Cy5 (C), Oxidation (C)

Cleavage by Trypsin: cuts C-term side of KR unless next residue is P

Sequence Coverage: 3%

Matched peptides shown in **Bold Red**

```
1 KFTAIALVTL LVLLASSSLS GVTAKADHRN PEEVKMFERW LVENHKNYNG
51 LGEKDKRFEI FMDNLKFVQE HNSVPNQSYE LGLTRFADLT NEEFRAIYLR
101 SKMERTRDSV KSERYLHNVG DKLPDEV DWR AKGAVVPVKD QGSCGSCWAF
151 SAIGAVEGIN QIKTGELVSL SEQELVDCDT SYNNGCGGGL MDYAFQFIIS
201 NGGIDTEEDY PYTATDDNIC NTDKKNTRVV TIDGYEDVPE NENSLKKALA
251 NQPISVAIEA GGRGFQLYKS GVFTGTCTGTA LDHGVVAVGY GTSEGQDYWI
301 IRNSWGSNWG ESGYIKLQRN IKDSSGKCGV AMMASYPTKS SGSNPPKPPP
351 PAPVVCDKSY TCPAKSTCCC LYEYKGCYS WGCCPLESAT CCEDGSSCCP
401 QAYPVCDLKA GTCRMKADSP LSVKALTRGP ATATTKATNV LVSSA
```

| Start - End      | Observed        | Mr (expt)        | Mr (calc)        | Delta          | Miss     | Sequence                     |                                 |
|------------------|-----------------|------------------|------------------|----------------|----------|------------------------------|---------------------------------|
| <b>247 - 263</b> | <b>565.9505</b> | <b>1694.8297</b> | <b>1693.9475</b> | <b>0.8823</b>  | <b>1</b> | <b>K.KALANQPISVAIEAGGR.G</b> | <a href="#">(Ions score 33)</a> |
| <b>248 - 263</b> | <b>783.8593</b> | <b>1565.7040</b> | <b>1565.8525</b> | <b>-0.1485</b> | <b>0</b> | <b>K.ALANQPISVAIEAGGR.G</b>  | <a href="#">(Ions score 60)</a> |
| <b>248 - 263</b> | <b>522.9362</b> | <b>1565.7867</b> | <b>1565.8525</b> | <b>-0.0658</b> | <b>0</b> | <b>K.ALANQPISVAIEAGGR.G</b>  | <a href="#">(Ions score 36)</a> |

# gi|15227987 Low expression of osmotically responsive genes 1 (LOS2)

## Protein View

Match to: gi|15227987 Score: 127

LOS2 (Low expression of osmotically responsive genes 1); phosphopyruvate hydratase [Arabidopsis thaliana]

Found in search of C:\Documents and Settings\schen\Desktop\MengMeng\0226 PLATE1 10SAMPLES\F4 1223.wiff

Nominal mass ( $M_r$ ): 47974; Calculated pI value: 5.54

NCBI BLAST search of [gi|15227987](#) against nr

Unformatted [sequence string](#) for pasting into other applications

Taxonomy: [Arabidopsis thaliana](#)

Links to retrieve other entries containing this sequence from NCBI Entrez:

[gi|119350](#) from [Arabidopsis thaliana](#)

[gi|15983458](#) from [Arabidopsis thaliana](#)

[gi|16271](#) from [Arabidopsis thaliana](#)

[gi|4581151](#) from [Arabidopsis thaliana](#)

[gi|23297411](#) from [Arabidopsis thaliana](#)

Fixed modifications: Carbamidomethyl (C)

Variable modifications: Oxidation (M), CyDye-Cy3 (C), CyDye-Cy5 (C), Oxidation (C)

Cleavage by Trypsin: cuts C-term side of KR unless next residue is P

Sequence Coverage: 7%

Matched peptides shown in **Bold Red**

```
1 MATITVVKAR QIFDSRGNPT VEVDIHTSNG IKVTAAVPSG ASTGIYEAL
51 LRDGGS DYLG KGVSKAVGNV NNIIGPALIG KDPTQQTAID NFMVHELDGT
101 QNEWGWCKQK LGANAILAVS LAVCKAGAVV SGIPLYKHIA NLAGNPKIVL
151 PVPAFNVING GSHAGNKLAM QEFMILPVGA ASFKEAMKMG VEVYHHLKSV
201 IKKKYGQDAT NVGDEGGFAP NIQENKEGLE LLKTAIEKAG YTGKVVIGMD
251 VAASEFYSED KTYDLNFKEE NNNGSQKISG DALKDLYKSF VAEYPIVSIE
301 DPFQDDWEH YAKMTTECGT EVQIVGDDLL VTNPKRVAKA IA EKSCNALL
351 LKVNQIGSVT ESIEAVKMSK KAGWGVMTSH RSGETEDTFI ADLAVGLSTG
401 QIKTGAPCRS ERLAKYNQLL RIEEELGSEA IYAGVNFRKP VEPY
```

Show predicted peptides also

Sort Peptides By

Residue Number  Increasing Mass  Decreasing Mass

| Start - End | Observed | Mr (expt) | Mr (calc) | Delta  | Miss | Sequence                                                     |
|-------------|----------|-----------|-----------|--------|------|--------------------------------------------------------------|
| 126 - 137   | 587.9131 | 1173.8116 | 1173.6758 | 0.1358 | 0    | <b>K.AGAVVSGIPLYK.H</b> ( <a href="#">Ions score 34</a> )    |
| 353 - 367   | 525.3462 | 1573.0169 | 1572.8359 | 0.1810 | 0    | <b>K.VNQIGSVTESIEAVK.M</b> ( <a href="#">Ions score 53</a> ) |
| 416 - 421   | 403.7902 | 805.5658  | 805.4446  | 0.1212 | 0    | <b>K.YNQLLR.I</b> ( <a href="#">Ions score 41</a> )          |

# gi|100554 14-3-3 protein homolog

## Protein View

Match to: gi|100554 Score: 48

14-3-3 protein homolog - barley

Found in search of C:\Documents and Settings\schen\Desktop\MengMeng\wiff files\26\A10 2111.wiff

Nominal mass ( $M_r$ ): 29361; Calculated pI value: 4.83

NCBI BLAST search of [gi|100554](#) against nr

Unformatted [sequence string](#) for pasting into other applications

Taxonomy: [Hordeum vulgare](#)

Links to retrieve other entries containing this sequence from NCBI Entrez:

[gi|22607](#) from [Hordeum vulgare subsp. vulgare](#)

Fixed modifications: Carbamidomethyl (C)

Variable modifications: Oxidation (M), CyDye-Cy3 (C), CyDye-Cy5 (C), Oxidation (C)

Cleavage by Trypsin: cuts C-term side of KR unless next residue is P

Sequence Coverage: 3%

Matched peptides shown in **Bold Red**

```
1 MSTAEATREE NVYMAKLAEQ AERYEEMVEF MEKVAKTADV GELTVEERNL
51 LSVAYKNVIG ARRASWRIIS SIEQKEESRG NEAYVASIKE YRTRIETELS
101 KICDGILKLL DSHLVPSATA AESKVFYLLKMGDYGHRYLAE FKAGAERKEA
151 AENTLVAYKS AQDIALADLP TTHPIRLGLA LNFSVFYYEI LNSPDRACNL
201 AKQAFDEAIA ELDSLGEESY KDSTLIMQLL RDNLTLWTSD NAEEGGDEIK
251 EAASKPEGEG H
```

| Start - End | Observed | Mr (expt) | Mr (calc) | Delta   | Miss | Sequence                                              |
|-------------|----------|-----------|-----------|---------|------|-------------------------------------------------------|
| 49 - 56     | 454.2645 | 906.5144  | 906.5174  | -0.0030 | 0    | <b>R.NLLSVAYK.N</b> ( <a href="#">Ions score 48</a> ) |

MS/MS Fragmentation of **NLLSVAYK**Found in **gi|100554**, 14-3-3 protein homolog - barley

| #        | <b>b</b> | <b>b<sup>++</sup></b> | <b>b<sup>*</sup></b> | <b>b<sup>*++</sup></b> | <b>b<sup>0</sup></b> | <b>b<sup>0++</sup></b> | Seq.     | <b>y</b>        | <b>y<sup>++</sup></b> | <b>y<sup>*</sup></b> | <b>y<sup>*++</sup></b> | <b>y<sup>0</sup></b> | <b>y<sup>0++</sup></b> | #        |
|----------|----------|-----------------------|----------------------|------------------------|----------------------|------------------------|----------|-----------------|-----------------------|----------------------|------------------------|----------------------|------------------------|----------|
| <b>1</b> | 115.0502 | 58.0287               | 98.0237              | 49.5155                |                      |                        | <b>N</b> |                 |                       |                      |                        |                      |                        | <b>8</b> |
| <b>2</b> | 228.1343 | 114.5708              | 211.1077             | 106.0575               |                      |                        | <b>L</b> | <b>793.4818</b> | 397.2445              | 776.4553             | 388.7313               | 775.4713             | 388.2393               | <b>7</b> |
| <b>3</b> | 341.2183 | 171.1128              | <b>324.1918</b>      | 162.5995               |                      |                        | <b>L</b> | <b>680.3978</b> | 340.7025              | 663.3712             | 332.1892               | 662.3872             | 331.6972               | <b>6</b> |
| <b>4</b> | 428.2504 | 214.6288              | 411.2238             | 206.1155               | 410.2398             | 205.6235               | <b>S</b> | <b>567.3137</b> | 284.1605              | 550.2871             | 275.6472               | 549.3031             | 275.1552               | <b>5</b> |
| <b>5</b> | 527.3188 | 264.1630              | 510.2922             | 255.6497               | 509.3082             | 255.1577               | <b>V</b> | <b>480.2817</b> | 240.6445              | 463.2551             | 232.1312               |                      |                        | <b>4</b> |
| <b>6</b> | 598.3559 | 299.6816              | 581.3293             | 291.1683               | 580.3453             | 290.6763               | <b>A</b> | <b>381.2132</b> | 191.1103              | 364.1867             | <b>182.5970</b>        |                      |                        | <b>3</b> |
| <b>7</b> | 761.4192 | <b>381.2132</b>       | 744.3927             | 372.7000               | 743.4087             | 372.2080               | <b>Y</b> | <b>310.1761</b> | 155.5917              | 293.1496             | 147.0784               |                      |                        | <b>2</b> |
| <b>8</b> |          |                       |                      |                        |                      |                        | <b>K</b> | 147.1128        | 74.0600               | 130.0863             | 65.5468                |                      |                        | <b>1</b> |

# gi|15242603 Calmodulin-binding protein

## Protein View

Match to: gi|15242603 Score: 65

calmodulin-binding protein [Arabidopsis thaliana]

Found in search of C:\Documents and Settings\schen\Desktop\MengMeng\wiff files\26\H5 2546.wiff

Nominal mass ( $M_r$ ): 20718; Calculated pI value: 4.86

NCBI BLAST search of [gi|15242603](#) against nr

Unformatted [sequence string](#) for pasting into other applications

Taxonomy: [Arabidopsis thaliana](#)

Links to retrieve other entries containing this sequence from NCBI Entrez:

[gi|10177506](#) from [Arabidopsis thaliana](#)

[gi|34098925](#) from [Arabidopsis thaliana](#)

[gi|37202088](#) from [Arabidopsis thaliana](#)

[gi|51968364](#) from [Arabidopsis thaliana](#)

[gi|51969122](#) from [Arabidopsis thaliana](#)

Fixed modifications: Carbamidomethyl (C)

Variable modifications: Oxidation (M), CyDye-Cy3 (C), CyDye-Cy5 (C), Oxidation (C)

Cleavage by Trypsin: cuts C-term side of KR unless next residue is P

Sequence Coverage: 4%

Matched peptides shown in **Bold Red**

```
1 MSEGyaiely FDPALenQVL KawnvFARRQ ISTKLINTES RPHITLFSTS
51 FFDSTRLESV IKNFVSKQEP ISISFSTIGS FSSDNNVLFSL SPTPSLSLLQ
101 LQTQLCDMLK KESVDIGEEY RVDSWVPPFCP VALDVPKSRM AEAFSVLRDL
151 KLPVNGYGME IGLVEFSPVR EVFSFPLGNT LES
```

| Start - End | Observed | Mr(expt)  | Mr(calc)  | Delta   | Miss | Sequence      |                                                 |
|-------------|----------|-----------|-----------|---------|------|---------------|-------------------------------------------------|
| 140 - 148   | 520.2466 | 1038.4786 | 1038.5168 | -0.0382 | 0    | R.MAEAFSVLR.D | Oxidation (M) ( <a href="#">Ions score 65</a> ) |

MS/MS Fragmentation of **MAEAFSVLR**Found in **gi|15242603**, calmodulin-binding protein [Arabidopsis thaliana]

| #        | <b>b</b>        | <b>b<sup>++</sup></b> | <b>b<sup>0</sup></b> | <b>b<sup>0++</sup></b> | Seq.     | <b>y</b>        | <b>y<sup>++</sup></b> | <b>y*</b> | <b>y<sup>*++</sup></b> | <b>y<sup>0</sup></b> | <b>y<sup>0++</sup></b> | #        |
|----------|-----------------|-----------------------|----------------------|------------------------|----------|-----------------|-----------------------|-----------|------------------------|----------------------|------------------------|----------|
| <b>1</b> | 148.0427        | 74.5250               |                      |                        | <b>M</b> |                 |                       |           |                        |                      |                        | <b>9</b> |
| <b>2</b> | <b>219.0798</b> | 110.0435              |                      |                        | <b>A</b> | <b>892.4887</b> | 446.7480              | 875.4621  | 438.2347               | 874.4781             | 437.7427               | <b>8</b> |
| <b>3</b> | <b>348.1224</b> | 174.5648              | 330.1118             | 165.5595               | <b>E</b> | <b>821.4516</b> | 411.2294              | 804.4250  | 402.7162               | 803.4410             | 402.2241               | <b>7</b> |
| <b>4</b> | 419.1595        | 210.0834              | 401.1489             | 201.0781               | <b>A</b> | <b>692.4090</b> | 346.7081              | 675.3824  | 338.1949               | 674.3984             | 337.7028               | <b>6</b> |
| <b>5</b> | 566.2279        | 283.6176              | 548.2174             | 274.6123               | <b>F</b> | <b>621.3719</b> | 311.1896              | 604.3453  | 302.6763               | 603.3613             | 302.1843               | <b>5</b> |
| <b>6</b> | 653.2599        | 327.1336              | 635.2494             | 318.1283               | <b>S</b> | <b>474.3035</b> | 237.6554              | 457.2769  | 229.1421               | 456.2929             | 228.6501               | <b>4</b> |
| <b>7</b> | 752.3284        | 376.6678              | 734.3178             | 367.6625               | <b>V</b> | <b>387.2714</b> | 194.1394              | 370.2449  | 185.6261               |                      |                        | <b>3</b> |
| <b>8</b> | 865.4124        | 433.2098              | 847.4019             | 424.2046               | <b>L</b> | 288.2030        | 144.6051              | 271.1765  | 136.0919               |                      |                        | <b>2</b> |
| <b>9</b> |                 |                       |                      |                        | <b>R</b> | 175.1190        | 88.0631               | 158.0924  | 79.5498                |                      |                        | <b>1</b> |



# gi|19568098 Osmotic stress-activated protein kinase (OST1)

## Protein View

Match to: gi|19568098 Score: 63

osmotic stress-activated protein kinase [Nicotiana tabacum]

Found in search of E:\GC ABA DIGE SEARCH\G7 1351.wiff

Nominal mass ( $M_r$ ): 41399; Calculated pI value: 5.64

NCBI BLAST search of [gi|19568098](#) against nr

Unformatted [sequence string](#) for pasting into other applications

Taxonomy: [Nicotiana tabacum](#)

Fixed modifications: Carbamidomethyl (C)

Variable modifications: Oxidation (M), Phospho (ST), CyDye-Cy3 (C), CyDye-Cy5 (C), Oxidation (C)

Cleavage by Trypsin: cuts C-term side of KR unless next residue is P

Sequence Coverage: 3%

Matched peptides shown in **Bold Red**

```
1 MDKYELVKDI GSGNFGVARL MRHKETKELV AMKYIERGHK IDENVAREII
51 NHRSLRHPNI IRFKEVLVTP THLAIVMEYA AGGELFERIC NAGRFSEDEA
101 RYFFQQLISG VHYCHNMQIC HRDLKLENTL LDGSPAPRLK ICDFGYSKSS
151 LLHSRPKSTV GTPAYIAPEV LSRREYDGKL ADVWSCGVTL YVMLVGAYPF
201 EDQEDPKNFR KTIQRIMAVQ YKIPDYVHIS QDCRHLLSRI FVANPARRIT
251 IKEIKSHPPWF LKNLPRELTE AAQAAYRRE NPTFSLQSVE EIMKIVEEAK
301 TPAPASRSVS GFGWGGEEEE EEKEGDVEEE EEEEEDEY EKQVKQAHES
351 GEVRLT
```

| Start - End | Observed | Mr(expt)  | Mr(calc)  | Delta   | Miss | Sequence                                          |
|-------------|----------|-----------|-----------|---------|------|---------------------------------------------------|
| 9 - 19      | 546.7584 | 1091.5023 | 1091.5360 | -0.0337 | 0    | K.DIGSGNFGVAR.L ( <a href="#">Ions score 65</a> ) |

MS/MS Fragmentation of **DIGSGNFGVAR**

Found in **gi19568098**, osmotic stress-activated protein kinase [Nicotiana tabacum]

| #  | b               | b <sup>++</sup> | b*              | b <sup>*++</sup> | b <sup>0</sup> | b <sup>0++</sup> | Seq.     | y               | y <sup>++</sup> | y*              | y <sup>*++</sup> | y <sup>0</sup> | y <sup>0++</sup> | #         |
|----|-----------------|-----------------|-----------------|------------------|----------------|------------------|----------|-----------------|-----------------|-----------------|------------------|----------------|------------------|-----------|
| 1  | 116.0342        | 58.5207         |                 |                  | 98.0237        | 49.5155          | <b>D</b> |                 |                 |                 |                  |                |                  | <b>11</b> |
| 2  | <b>229.1183</b> | 115.0628        |                 |                  | 211.1077       | 106.0575         | <b>I</b> | 977.5163        | 489.2618        | 960.4898        | 480.7485         | 959.5057       | 480.2565         | <b>10</b> |
| 3  | 286.1397        | 143.5735        |                 |                  | 268.1292       | 134.5682         | <b>G</b> | <b>864.4322</b> | 432.7198        | 847.4057        | <b>424.2065</b>  | 846.4217       | <b>423.7145</b>  | <b>9</b>  |
| 4  | 373.1718        | 187.0895        |                 |                  | 355.1612       | 178.0842         | <b>S</b> | <b>807.4108</b> | 404.2090        | 790.3842        | 395.6958         | 789.4002       | 395.2037         | <b>8</b>  |
| 5  | 430.1932        | 215.6003        |                 |                  | 412.1827       | 206.5950         | <b>G</b> | <b>720.3787</b> | 360.6930        | 703.3522        | 352.1797         |                |                  | <b>7</b>  |
| 6  | 544.2362        | 272.6217        | <b>527.2096</b> | 264.1084         | 526.2256       | 263.6164         | <b>N</b> | <b>663.3573</b> | 332.1823        | <b>646.3307</b> | 323.6690         |                |                  | <b>6</b>  |
| 7  | 691.3046        | 346.1559        | 674.2780        | 337.6427         | 673.2940       | 337.1506         | <b>F</b> | <b>549.3144</b> | 275.1608        | 532.2878        | 266.6475         |                |                  | <b>5</b>  |
| 8  | 748.3260        | 374.6667        | 731.2995        | 366.1534         | 730.3155       | 365.6614         | <b>G</b> | <b>402.2459</b> | <b>201.6266</b> | 385.2194        | 193.1133         |                |                  | <b>4</b>  |
| 9  | 847.3945        | <b>424.2009</b> | 830.3679        | 415.6876         | 829.3839       | 415.1956         | <b>V</b> | <b>345.2245</b> | 173.1159        | 328.1979        | 164.6026         |                |                  | <b>3</b>  |
| 10 | 918.4316        | 459.7194        | 901.4050        | 451.2061         | 900.4210       | 450.7141         | <b>A</b> | <b>246.1561</b> | 123.5817        | <b>229.1295</b> | 115.0684         |                |                  | <b>2</b>  |
| 11 |                 |                 |                 |                  |                |                  | <b>R</b> | 175.1190        | 88.0631         | 158.0924        | 79.5498          |                |                  | <b>1</b>  |

# gi|115468776 Os06g0597200, Serine/threonine phosphatases 2C (PP2C) family

## Protein View

Match to: gi|115468776 Score: 51

Os06g0597200 [Oryza sativa (japonica cultivar-group)]

Found in search of C:\Documents and Settings\schen\Desktop\MengMeng\wiff files\500ug Prep Gel Plate 4 Q-Trap 33\B1 2630.wiff

Nominal mass ( $M_r$ ): 40100; Calculated pI value: 5.32

NCBI BLAST search of [gi|115468776](#) against nr

Unformatted [sequence string](#) for pasting into other applications

Taxonomy: [Oryza sativa Japonica Group](#)

Links to retrieve other entries containing this sequence from NCBI Entrez:

[gi|50725574](#) from [Oryza sativa Japonica Group](#)

[gi|113596027](#) from [Oryza sativa Japonica Group](#)

Fixed modifications: Carbamidomethyl (C)

Variable modifications: Oxidation (M), Phospho (ST), CyDye-Cy3 (C), CyDye-Cy5 (C), Oxidation (C)

Cleavage by Trypsin: cuts C-term side of KR unless next residue is P

Sequence Coverage: 4%

Matched peptides shown in **Bold Red**

```
1 MEEHRLGGGG GGGGGGRPP IPGAAGRKLP GLSRHASFVR SPANSTKSGT
51 EKTFENMDAV AYMPVVRSGG WADIGSRHTM EDVFICSDNL MKEFGVESFE
101 DGPSAFYGVF DGHGGKHAAD FVCSNLARFI VEDEDFPREI EKALSSAFLQ
151 TDAAFADACS VNSSLASGTT ALAALVVGRS LLVANAGDCR AVLCCRGKAI
201 EMSRDHKPSC NREKVRIEAS GGYVYDGYLN GQLNVARAIG DWHMEGMKAC
251 DGLGPLSAEP EVMIRNLTEE DEFLIIGCDG IWDVFRSQNA VDFARRKLQE
301 HNDPVTCKE LVDEAIKRKS GDNLSVVVIC FNSRPPPVLT TPRPRVQRSI
351 SAEGLRELQS FLDSLAD
```

| Start - End      | Observed        | Mr (expt)       | Mr (calc)       | Delta          | Miss     | Sequence                                                            |
|------------------|-----------------|-----------------|-----------------|----------------|----------|---------------------------------------------------------------------|
| <b>41 - 47</b>   | <b>432.2302</b> | <b>862.4459</b> | <b>863.2827</b> | <b>-0.8368</b> | <b>0</b> | <b>R.SPANSTK.S</b> 2 Phospho (ST) ( <a href="#">Ions score 15</a> ) |
| <b>349 - 356</b> | <b>416.7419</b> | <b>831.4693</b> | <b>831.4450</b> | <b>0.0243</b>  | <b>0</b> | <b>R.SISAEGLR.E</b> ( <a href="#">Ions score 36</a> )               |

# gi|62733113 Retrotransposon protein, putative

## Protein View

Match to: gi|62733113 Score: 49

retrotransposon protein, putative, Ty3-gypsy sub-class [Oryza sativa (japonica cultivar-group)]

Found in search of C:\Documents and Settings\schen\Desktop\MengMeng\9\B8\_663.wiff

Nominal mass ( $M_r$ ): 92125; Calculated pI value: 7.23

NCBI BLAST search of [gi|62733113](#) against nr

Unformatted [sequence string](#) for pasting into other applications

Taxonomy: [Oryza sativa Japonica Group](#)

Fixed modifications: Carbamidomethyl (C)

Variable modifications: Oxidation (M), CyDye-Cy3 (C), CyDye-Cy5 (C), Oxidation (C)

Cleavage by Trypsin: cuts C-term side of KR unless next residue is P

Sequence Coverage: 2%

Matched peptides shown in **Bold Red**

```
1  MTSGNEINKI SLEDLDVEAR KITEECIKAI TQEALMRSCF RTHQGVVLKP
51  EPLIKPSFDM HRPENMEELT SIIIRDKFGI EAMDRAREYQ KSYPDYYDNI
101 PYPRGYRVPE FTNFSGEDSR TTWEYVAELN DGSDCITSES EIVLSPKIES
151 QINHVDVGGK DDNVLYRSSE IESKVAMHTY QRPYPERIDL VPYPQGFVFP
201 NPTKFTGEDA RTTMEHICQF IEQSGKTGSN DLLKCLKFSL SLSNFASIWY
251 SLLAPNSIST WSQMEHEFHQ YFKDASLMEQ NPIDNSSVTC DTISVIPFAK
301 TRIVSNPLPI SPIDLDNEKV VIRPSQAEST KGKCVIIGDL RPKTRINNTK
351 ADDHKVVKDE SSSFQKTKKL NLTFEMLMAK YKKGLAGQQF DNQTSDLKRP
401 RSYRRKRFQ TPKQSEPSTI PTPYKPIVM PWYPYPMPLY GYPFMYMPW
451 MPQPYMPFHQ EWKQSSRSVP SHSFNSSQDR FPQKSRSGGS KVKQVKKVWV
501 RKEAKAPEVV TIKEESQDVQ VPTRDAVKTI QAKKTEADAV TAKSGGLIET
551 AGWSDRRLAT GLTGPRGWSD RGALEKSGKC GIHLAFEIVQ SRKPILLGGQ
601 DINMLMKKSK EMNNDGYNIT SLSRRLLDK TRLLWEKYMK GFVELINWPG
651 QRFVLIATDY FIKWAEAVPL KNITYTEANG QAESSNKTLL KLVEKEIEEH
701 QKKWHEVLSE ALWTHRIFKH GVTKVTSFEL VCGQEAVLPI EVNLGYLRYF
751 KQDDLSEVDY KILMGGNFED VIDKRLKTLK EMDALQENNP WEILEEILP
```

| Start - End | Observed | Mr (expt) | Mr (calc) | Delta  | Miss | Sequence                                                           |
|-------------|----------|-----------|-----------|--------|------|--------------------------------------------------------------------|
| 22 - 28     | 426.3209 | 850.6272  | 850.4106  | 0.2166 | 0    | <b>K.ITEECIK.A</b> Oxidation (C) ( <a href="#">Ions score 19</a> ) |
| 558 - 566   | 443.2643 | 884.5140  | 884.5080  | 0.0060 | 0    | <b>R.LATGLTGPR.G</b> ( <a href="#">Ions score 30</a> )             |

# gi|15241472 Tubulin beta-4 chain(TUB4)

## Protein View

Match to: gi|15241472 Score: 217

TUB4 (tubulin beta-4 chain) [Arabidopsis thaliana]

Found in search of C:\Documents and Settings\schen\Desktop\MengMeng\9\F6 1237.wiff

Nominal mass ( $M_r$ ): 50361; Calculated pI value: 4.76

NCBI BLAST search of [gi|15241472](#) against nr

Unformatted [sequence string](#) for pasting into other applications

Taxonomy: [Arabidopsis thaliana](#)

Links to retrieve other entries containing this sequence from NCBI Entrez:

[gi|27735260](#) from [Arabidopsis thaliana](#)

[gi|10176889](#) from [Arabidopsis thaliana](#)

[gi|14334936](#) from [Arabidopsis thaliana](#)

[gi|16323374](#) from [Arabidopsis thaliana](#)

Fixed modifications: Carbamidomethyl (C)

Variable modifications: Oxidation (M), CyDye-Cy3 (C), CyDye-Cy5 (C), Oxidation (C)

Cleavage by Trypsin: cuts C-term side of KR unless next residue is P

Sequence Coverage: 9%

Matched peptides shown in **Bold Red**

```
1 MREILHIQGG QCGNQIGAKF WEVICDEHGI DHTGQYVGDS PLQLERIDVY
51 FNEASGGKYV PRAVLMDLEP GTMDSLRS GP FGQIFRPDNF VFGQSGAGNN
101 WAKGHYTEGA ELIDSVLDVV RKEAENS DCL QGFQVCHSLG GGTGSGMGTL
151 LISKIREEYP DRMMMTFSVF PSPKVS DTVV EPYNATLSVH QLVENADECM
201 VLDNEALYDI CFRTLKLANP TFGDLNHLIS ATMSGVTCCCL RFPGQLNSDL
251 RKLAVNLIPF PRLHFFMVG F APLTSRGSQQ YSALSVP ELT QQMWDAKNMM
301 CAADPRHGRY LTASAVFRGK LSTKEVDEQM MNIQNKNSSY FVEWIPNNVK
351 SSVCDIAPKG LKMASTFIGN STSIQEMFRR VSEQFTAMFR RKAFLHWYTG
401 EGMDEMEFTE AESNMNDLVA EYQQYQDATA GEEYEYEEEE EYET
```

| Start - End | Observed | Mr (expt) | Mr (calc) | Delta   | Miss | Sequence                                                              |
|-------------|----------|-----------|-----------|---------|------|-----------------------------------------------------------------------|
| 47 - 58     | 650.2991 | 1298.5837 | 1298.6143 | -0.0306 | 0    | <b>R.IDVYFNEASGGK.Y</b> ( <a href="#">Ions score 62</a> )             |
| 242 - 251   | 573.7901 | 1145.5656 | 1145.5829 | -0.0173 | 0    | <b>R.FPGQLNSDLR.K</b> ( <a href="#">Ions score 44</a> )               |
| 253 - 262   | 570.3348 | 1138.6551 | 1138.6862 | -0.0311 | 0    | <b>K.LAVNLIPFPR.L</b> ( <a href="#">Ions score 49</a> )               |
| 381 - 390   | 616.3009 | 1230.5873 | 1230.5703 | 0.0170  | 0    | <b>R.VSEQFTAMFR.R</b> Oxidation (M) ( <a href="#">Ions score 63</a> ) |

# gi|4139264 Actin

## Protein View

Match to: gi|4139264 Score: 298

actin [Brassica napus]

Found in search of C:\Documents and Settings\schen\Desktop\MengMeng\500ug Prep gel Plate 2\B1 1546.wiff

Nominal mass ( $M_r$ ): 41888; Calculated pI value: 5.29

NCBI BLAST search of [gi|4139264](#) against nr

Unformatted [sequence string](#) for pasting into other applications

Taxonomy: [Brassica napus](#)

Fixed modifications: Carbamidomethyl (C)

Variable modifications: Oxidation (M), CyDye-Cy3 (C), CyDye-Cy5 (C), Oxidation (C)

Cleavage by Trypsin: cuts C-term side of KR unless next residue is P

Sequence Coverage: 17%

Matched peptides shown in **Bold Red**

```
1  MADGEDIQPL VCDNGTGMVK AGFAGDDAPR AVFPSIVGRP RHTGVMVGMG
51  QKDAYVGDEA QSKRGILTLK YPIEHGIVSN WDDMENIWHH TFYNELRVAP
101 EEHPVLLTEA PLNPKANREK MTHIMFETFN VPAMYVAIQV VLSLYASGRT
151 TGIVLDSGDG VSHTVPIYEG YALPHAILRL DLAGRDLTDS LMKILTERGY
201 MFTTTAEREI VRDIKEKLAY VALDYEQELE TAKSSSSVEK NYELPDGQVI
251 TIGAERFRCP EVLFQPSLVG MEAPGIHETT YNSIMKCDVD IRKDLYGNIV
301 LSGGSTMFPG IADRMSKEIT ALAPSSMKIK VVAPPERKYS VWIGGSILAS
351 LSTFQQMWIS KGEYDESGPS IVHRKCF
```

| Start - End | Observed | Mr(expt)  | Mr(calc)  | Delta   | Miss | Sequence                                                        |
|-------------|----------|-----------|-----------|---------|------|-----------------------------------------------------------------|
| 21 - 30     | 488.7436 | 975.4726  | 975.4410  | 0.0316  | 0    | K.AGFAGDDAPR.A ( <a href="#">Ions score 59</a> )                |
| 21 - 30     | 488.7533 | 975.4920  | 975.4410  | 0.0510  | 0    | K.AGFAGDDAPR.A ( <a href="#">Ions score 23</a> )                |
| 53 - 63     | 591.7711 | 1181.5276 | 1181.5200 | 0.0076  | 0    | K.DAYVGDEAQSK.R ( <a href="#">Ions score 37</a> )               |
| 186 - 193   | 469.7407 | 937.4669  | 937.4426  | 0.0242  | 0    | R.DLTDSLIMK.I Oxidation (M) ( <a href="#">Ions score 36</a> )   |
| 199 - 208   | 588.7473 | 1175.4801 | 1175.5281 | -0.0480 | 0    | R.GYMFTTTAER.E ( <a href="#">Ions score 23</a> )                |
| 199 - 208   | 596.7648 | 1191.5151 | 1191.5230 | -0.0079 | 0    | R.GYMFTTTAER.E Oxidation (M) ( <a href="#">Ions score 65</a> )  |
| 241 - 256   | 887.9256 | 1773.8366 | 1773.8897 | -0.0531 | 0    | K.NYELPDGQVITIGAER.F ( <a href="#">Ions score 72</a> )          |
| 318 - 328   | 582.3145 | 1162.6145 | 1162.5903 | 0.0242  | 0    | K.EITALAPSSMK.I Oxidation (M) ( <a href="#">Ions score 28</a> ) |

# gi|14248550 Plastid-lipid associated protein PAP2

## Protein View

Match to: gi|14248550 Score: 54

plastid-lipid associated protein PAP2 [Brassica rapa]

Found in search of C:\Documents and Settings\schen\Desktop\MengMeng\D10 2330.wiff

Nominal mass ( $M_r$ ): 34689; Calculated pI value: 4.79

NCBI BLAST search of [gi|14248550](#) against nr

Unformatted [sequence string](#) for pasting into other applications

Taxonomy: [Brassica rapa subsp. campestris](#)

Fixed modifications: Carbamidomethyl (C)

Variable modifications: Oxidation (M), CyDye-Cy3 (C), CyDye-Cy5 (C), Oxidation (C)

Cleavage by Trypsin: cuts C-term side of KR unless next residue is P

Sequence Coverage: 3%

Matched peptides shown in **Bold Red**

```
1 MATVHSFNQF PCKTRVQCPS NSKPLSKPPS SLVPMSALTR RPSFSPGEFA
51 VSRSDFRVRV IDAEDELDP E TSEGGGSALL MAEEAIESVE ETEVLKRSLV
101 DSLYGTDRGL SASSETRAEI GDLITQLESK NPTPAPTDAL FLLNGKWILA
151 YTSFVGLFPL LSRGIVPLVK VDEISQTIDS DNFTVENSVL FAGPLATTSI
201 STNAKFEIRS PKRVQIKFEE GVIGTPQLTD SIEIPEYVEF LGQKIDLTPI
251 RGLLTSVQDT ATSVARTISS QPPLKFSLPG DSAQSWLLTT YLDKDIRISR
301 GDGGSVFLI KEGSPLLNP
```

| Start - End | Observed | Mr(expt)  | Mr(calc)  | Delta  | Miss | Sequence                                                 |
|-------------|----------|-----------|-----------|--------|------|----------------------------------------------------------|
| 98 - 108    | 613.3112 | 1224.6079 | 1224.5986 | 0.0092 | 0    | <b>R.SLVDSLYGTDR.G</b> ( <a href="#">Ions score 54</a> ) |

MS/MS Fragmentation of **SLVDSLYGTDR**

Found in **gi|14248550**, plastid-lipid associated protein PAP2 [Brassica rapa]

| #         | <b>b</b>        | <b>b<sup>++</sup></b> | <b>b<sup>0</sup></b> | <b>b<sup>0++</sup></b> | Seq.     | <b>y</b>         | <b>y<sup>++</sup></b> | <b>y*</b> | <b>y<sup>*++</sup></b> | <b>y<sup>0</sup></b> | <b>y<sup>0++</sup></b> | #         |
|-----------|-----------------|-----------------------|----------------------|------------------------|----------|------------------|-----------------------|-----------|------------------------|----------------------|------------------------|-----------|
| <b>1</b>  | 88.0393         | 44.5233               | 70.0287              | 35.5180                | <b>S</b> |                  |                       |           |                        |                      |                        | <b>11</b> |
| <b>2</b>  | <b>201.1234</b> | 101.0653              | 183.1128             | 92.0600                | <b>L</b> | 1138.5739        | 569.7906              | 1121.5473 | 561.2773               | 1120.5633            | 560.7853               | <b>10</b> |
| <b>3</b>  | 300.1918        | 150.5995              | 282.1812             | 141.5942               | <b>V</b> | <b>1025.4898</b> | 513.2485              | 1008.4633 | 504.7353               | 1007.4793            | 504.2433               | <b>9</b>  |
| <b>4</b>  | <b>415.2187</b> | 208.1130              | 397.2082             | 199.1077               | <b>D</b> | <b>926.4214</b>  | 463.7143              | 909.3949  | 455.2011               | 908.4108             | 454.7091               | <b>8</b>  |
| <b>5</b>  | 502.2508        | 251.6290              | 484.2402             | 242.6237               | <b>S</b> | <b>811.3945</b>  | 406.2009              | 794.3679  | 397.6876               | 793.3839             | 397.1956               | <b>7</b>  |
| <b>6</b>  | 615.3348        | 308.1710              | 597.3243             | 299.1658               | <b>L</b> | <b>724.3624</b>  | 362.6849              | 707.3359  | 354.1716               | 706.3519             | 353.6796               | <b>6</b>  |
| <b>7</b>  | 778.3981        | 389.7027              | 760.3876             | 380.6974               | <b>Y</b> | <b>611.2784</b>  | 306.1428              | 594.2518  | <b>297.6295</b>        | 593.2678             | 297.1375               | <b>5</b>  |
| <b>8</b>  | 835.4196        | 418.2134              | 817.4090             | 409.2082               | <b>G</b> | <b>448.2150</b>  | 224.6112              | 431.1885  | 216.0979               | 430.2045             | 215.6059               | <b>4</b>  |
| <b>9</b>  | 936.4673        | 468.7373              | 918.4567             | 459.7320               | <b>T</b> | 391.1936         | 196.1004              | 374.1670  | 187.5872               | 373.1830             | 187.0951               | <b>3</b>  |
| <b>10</b> | 1051.4942       | 526.2508              | 1033.4837            | 517.2455               | <b>D</b> | 290.1459         | 145.5766              | 273.1193  | 137.0633               | 272.1353             | 136.5713               | <b>2</b>  |
| <b>11</b> |                 |                       |                      |                        | <b>R</b> | 175.1190         | 88.0631               | 158.0924  | 79.5498                |                      |                        | <b>1</b>  |



# gi|14248552 Plastid-lipid associated protein PAP3

## Protein View

Match to: gi|14248552 Score: 128

plastid-lipid associated protein PAP3 [Brassica rapa]

Found in search of C:\Documents and Settings\schen\Desktop\MengMeng\500ug Prep gel Plate 2\H12 2051.wiff

Nominal mass ( $M_r$ ): 39278; Calculated pI value: 4.55

NCBI BLAST search of [gi|14248552](#) against nr

Unformatted [sequence string](#) for pasting into other applications

Taxonomy: [Brassica rapa subsp. campestris](#)

Fixed modifications: Carbamidomethyl (C)

Variable modifications: Oxidation (M), CyDye-Cy3 (C), CyDye-Cy5 (C), Oxidation (C)

Cleavage by Trypsin: cuts C-term side of KR unless next residue is P

Sequence Coverage: 9%

Matched peptides shown in **Bold Red**

```
1  MATLFTVTTT SRPFPANPSK TFSPSISLKP NALSFSLTHH RPPRPLRFSK
51  IRSSLPSESD SEPEGYSVT DEWGEQPAEP ESPPDNAPSA VSDEWGEKSE
101 SVPEESVTRF AESDPPTNED EWEEREADDG VDKTWELKRC LADTVYGTTEL
151 GFRAGSEVRA EVLEIVNQL EALNPTQAPVE NPELLDGNWV LLYTAFSELL
201 PLLAAGSTPL LKVKSISQSI DTKSLSIDNS TTLSSPFADF SFSATASFEV
251 RTPSRIEVSF KEGTLKPPEI KSSVDLPESV GVFGQEINLS FLKQSLNPLQ
301 DVAANISRAI SGQPPLKLPF PGNRGSSWLL TTYLDKDLRI SRGDGGLFVL
351 AREGSSLLEL
```

| Start - End | Observed | Mr (expt) | Mr (calc) | Delta   | Miss | Sequence                                                     |
|-------------|----------|-----------|-----------|---------|------|--------------------------------------------------------------|
| 215 - 223   | 489.7758 | 977.5371  | 977.5029  | 0.0342  | 0    | <b>K.SISQSIDTK.S</b> ( <a href="#">Ions score 58</a> )       |
| 294 - 308   | 813.4080 | 1624.8014 | 1624.8533 | -0.0518 | 0    | <b>K.QSLNPLQDVAANISR.A</b> ( <a href="#">Ions score 48</a> ) |
| 309 - 317   | 455.7883 | 909.5620  | 909.5284  | 0.0337  | 0    | <b>R.AISGQPPLK.L</b> ( <a href="#">Ions score 22</a> )       |

# gi|4469009 Putative protein, containing band 7 stomatin domain

## Protein View

Match to: gi|4469009 Score: 75

putative protein [Arabidopsis thaliana]

Found in search of C:\Documents and Settings\schen\Desktop\MengMeng\500ug Prep gel Plate 2\1577.wiff

Nominal mass ( $M_r$ ): 56003; Calculated pI value: 5.17

NCBI BLAST search of [gi|4469009](#) against nr

Unformatted [sequence string](#) for pasting into other applications

Taxonomy: [Arabidopsis thaliana](#)

Links to retrieve other entries containing this sequence from NCBI Entrez:

[gi|7269612](#) from [Arabidopsis thaliana](#)

Fixed modifications: Carbamidomethyl (C)

Variable modifications: Oxidation (M), CyDye-Cy3 (C), CyDye-Cy5 (C), Oxidation (C)

Cleavage by Trypsin: cuts C-term side of KR unless next residue is P

Sequence Coverage: 4%

Matched peptides shown in **Bold Red**

```
1 MNHLVRKSSV GYSALRSVSY LRQSAVTSPP PIFSAAASTV RQFTSAGYPS
51 NSFQLTPPTN WGIRIVPERK AFVIERFGKY ATTLPSGIHF LIPFVDRIAY
101 VHSLKEEAIP IPNQTAITKD NVSIHIDGVL YVKIVDPKLA SYGVESPIYA
151 VVQLAQTTMR SELGKITLDK TFEERDTLNE KIVEAINVAA KDWGLQCLRY
201 EIRDIMPPHG VRAAMEMQAE AERKKRAQIL ESEGERQSHI NIADGKKSSV
251 ILASEAAKMD QVNRAQGEAE AILARAQATA KGLVLLSQSL KETGGVEAAS
301 LRVAEQYITA FGNIAKEGTI MLLPSGASNP ASMIAQALTM YKSLVINGPS
351 KDHQETQALD ETDLEELEDM GEKHISEGSN NRSGSISFDT EKPALPIVSF
401 VFQTNPFNPK TMGACASKPK ESDIVEGSVS TENAVVESKN AATETDATLT
451 QEKKEESIEE TKKEGETKED SSEATKAEPT PEAVKAEKKT SSETEPPAQE
501 TTPAAKTDEA PLVIL
```

| Start - End | Observed        | Mr (expt)        | Mr (calc)        | Delta          | Miss | Sequence               |                                   |
|-------------|-----------------|------------------|------------------|----------------|------|------------------------|-----------------------------------|
| 248 - 258   | <b>538.2852</b> | <b>1074.5558</b> | <b>1074.5921</b> | <b>-0.0362</b> | 0    | <b>K.SSVILASEAAK.M</b> | ( <a href="#">Ions score 43</a> ) |
| 265 - 275   | <b>564.8173</b> | <b>1127.6200</b> | <b>1127.5934</b> | <b>0.0265</b>  | 0    | <b>R.AQGEAEAILAR.A</b> | ( <a href="#">Ions score 32</a> ) |

# gi|585777 GTP-binding nuclear protein RAN1

## Protein View

Match to: gi|585777 Score: 76

GTP-binding nuclear protein Ran1

Found in search of C:\Documents and Settings\schen\Desktop\MengMeng\wiff files\26\A10 2111.wiff

Nominal mass ( $M_r$ ): 25512; Calculated pI value: 6.25

NCBI BLAST search of [gi|585777](#) against nr

Unformatted [sequence string](#) for pasting into other applications

Taxonomy: [Solanum lycopersicum](#)

Links to retrieve other entries containing this sequence from NCBI Entrez:

[gi|453561](#) from [Solanum lycopersicum](#)

[gi|77745509](#) from [Solanum tuberosum](#)

[gi|82623375](#) from [Solanum tuberosum](#)

Fixed modifications: Carbamidomethyl (C)

Variable modifications: Oxidation (M), CyDye-Cy3 (C), CyDye-Cy5 (C), Oxidation (C)

Cleavage by Trypsin: cuts C-term side of KR unless next residue is P

Sequence Coverage: 9%

Matched peptides shown in **Bold Red**

```
1 MALPNQQTVD YPSFKLVIVG DGGTGKTTFV KRHLTGEFEK KYEPTIGVEV
51 HPLDFFTNCG KIRFYCWDTA GQEKFGGLRD GYYIHGQCAI IMFDTVARTL
101 YKNVPTWHRD LCRVCENIPI VLCGNKVDVK NRQVKAKQVT FHRKNLQYY
151 EISAKSNYNF EKPFLYLARK LAGDGNLHFV ESPALAPPEV HIDLAAQALH
201 EEELQQAANQ PLPDDDDDEAF E
```

| Start - End | Observed | Mr(expt)  | Mr(calc)  | Delta   | Miss | Sequence               |                                   |
|-------------|----------|-----------|-----------|---------|------|------------------------|-----------------------------------|
| 16 - 26     | 508.2510 | 1014.4874 | 1014.5710 | -0.0836 | 0    | <b>K.LVIVGDGGTGK.T</b> | ( <a href="#">Ions score 40</a> ) |
| 146 - 155   | 614.7548 | 1227.4950 | 1227.6135 | -0.1185 | 0    | <b>K.NLQYYEISAK.S</b>  | ( <a href="#">Ions score 36</a> ) |

## Figure S5

This set of supplemental data contains the information of the coverage, peptides and MS/MS spectrum (if only one peptide identified for the protein) of each protein identified to be redox sensitive to ABA treatment in guard cells by ICAT.

# gi|8745521 Ribulose-1,5-bisphosphate carboxylase / oxygenase large subunit

## Proteins Detected

| N | Unu ... | Total | % Cov | Accessio... | Name                                               | Species              | Peptides(95%) | Biological Processes | Molecular Functions | PANTHER ID |
|---|---------|-------|-------|-------------|----------------------------------------------------|----------------------|---------------|----------------------|---------------------|------------|
| 1 | 48.95   | 48.95 | 89.5  | gi 414103   | myrosinase, thioglucoside glucohydrolase[Brassi... | Brassica napus       | 37            |                      |                     |            |
| 2 | 27.81   | 27.81 | 84.3  | gi 8745521  | ribulose-1,5-bisphosphate carboxylase/oxygenas...  | Brassica napus       | 21            |                      |                     |            |
| 3 | 11.79   | 11.79 | 88.3  | gi 11972... | ribulose bisphosphate carboxylase [Brassica rapa]  | Brassica rapa        | 11            |                      |                     |            |
| 4 | 10.55   | 10.55 | 56.0  | gi 558479   | tonoplast ATPase 70 kDa subunit                    |                      | 5             |                      |                     |            |
| 5 | 10.27   | 10.27 | 54.6  | gi 15226... | putative triosephosphate isomerase [Arabidopsis... | Arabidopsis thaliana | 7             |                      |                     |            |
| 6 | 10.21   | 10.21 | 64.2  | gi 15229... | glyceraldehyde-3-phosphate dehydrogenase Cs...     | Arabidopsis thaliana | 6             |                      |                     |            |

## Protein Group 2 - ribulose-1,5-bisphosphate carboxylase/oxygenase [Brassica napus]

| Proteins in Group |         |       |             |                          |                    | Peptides in Group |      |                        |                                                    |                |        |            |
|-------------------|---------|-------|-------------|--------------------------|--------------------|-------------------|------|------------------------|----------------------------------------------------|----------------|--------|------------|
| N                 | Unu ... | Total | Accessio... | Name                     | Species            | Con...            | Conf | Sequence               | Modifications                                      | Cleavages      | ΔMass  | Prec MW    |
| 2                 | 27.81   | 27.81 | gi 8745521  | ribulose-1,5-bisphos...  | Brassica napus     | 2.00              | 99   | CYHIEPVPGEETQFIAY      | ICAT-C(C)@1<br>Glu->Lys@11<br>Deamidated(Q)@13     | cleaved Y-V... | 0.1842 | 2222.25... |
| 2                 | 0.00    | 27.81 | gi 30959... | ribulose-1,5-bisphos...  | Brassica juncea    |                   |      |                        |                                                    |                |        |            |
| 2                 | 0.00    | 27.81 | gi 30959... | ribulose-1,5-bisphos...  | Brassica rapa      | 2.00              | 99   | ELGVPIVMHDYLTGGFTAN... | Oxidation(M)@8<br>ICAT-C(C)@26                     |                | 0.4291 | 3207.97... |
| 2                 | 0.00    | 27.81 | gi 167157   | ribulosebisphosphat...   |                    | 2.00              | 99   | GHYLNATAGTCEEMMK       | ICAT-C(C)@11<br>Oxidation(M)@14<br>Oxidation(M)@15 |                | 0.1905 | 2014.04... |
| 2                 | 0.00    | 27.81 | gi 1346967  | Ribulose bisphosph...    | BRAOL              |                   |      |                        |                                                    |                |        |            |
|                   | 0.00    | 26.10 | gi 15732... | ribulose-1,5-bisphosp... | Brassica olerac... |                   |      |                        |                                                    |                |        |            |
|                   |         |       |             |                          |                    | 2.00              | 99   | LSGGDHVHAGTVVKGLEGDR   |                                                    | missed K-L...  | 0.2717 | 2003.29... |
|                   |         |       |             |                          |                    | 2.00              | 99   | PLLGCTIKPK             | ICAT-C:13C(9)(C)@5                                 | cleaved R-P... | 0.1656 | 1304.95... |
|                   |         |       |             |                          |                    | 2.00              | 99   | TFQGPPIQVER            |                                                    |                | 0.1852 | 1464.93... |
|                   |         |       |             |                          |                    | 2.00              | 99   | TKTFQGPPIQVER          | Thr->Val@1                                         | cleaved Y-T... | 0.1548 | 1692.06... |
|                   |         |       |             |                          |                    | 2.00              | 99   | VALEACVQAR             | ICAT-C(C)@6                                        |                | 0.1551 | 1285.83... |
|                   |         |       |             |                          |                    | 2.00              | 99   | VAYPLDLFEESVTNMF...    | Oxidation(M)@16                                    | cleaved Y-V... | 0.3629 | 3096.87... |
|                   |         |       |             |                          |                    | 2.00              | 99   | YGRPLLGCITIKPK         | Gly->Pro@2<br>ICAT-C(C)@8                          |                | 0.1914 | 1712.17... |
|                   |         |       |             |                          |                    | 1.70              | 98   | WSPELAAACEVVK          | ICAT-C(C)@9<br>Oxidation(W)@12                     |                | 0.2116 | 1732.04... |

## Protein Sequence Coverage - ribulose-1,5-bisphosphate carboxylase/oxygenase [Brassica napus]

MS PQTETKASVGFKAGVKEYKLNYYTPEYETKDDTDILAAFRVTPQPGVPEEAGAAVAEESSTGTWTTVWIDGLTSLDRYKRCYHIEPVPGEETQFIAYVAYPLDLFEESVTNMFSTSIVGNVGFK  
 ALAALRLEDLRIIPPAYTKTFQGPPIQVERDKLNKYGRPLLGCITIKPKLGLSAKNYGRAVYECLELGGDLFTKDDENVNSQPFMRWRDRFLFCABEAIYKSAETGEIKGHYLNATAGTCEEMMKRAIF  
 ARELGVPIVMHDYLTGGFTANTSLAHYCRDNGLLLIHHRAMHAVIDRQKNHGMHFRVLAKALRLSGGDHVBHAGTVVKGLEGDRSTLGFVDLLRDDYVEKDRSRGIFFTQDWSLPGVLPVASSGGIHW  
 WHMPALTEIFGDDSVLQFGGGTLGHFWGNAPGAVANRVALEACVQARNEGRDLAVEGNEIIREACKWSPELAAACEVWKEITFNFPITDKLDGQD

# gi|119980 Ferredoxin

## Proteins Detected

| N  | Unu... | Total | % Cov | Accessio... | Name                                                 | Species              | Peptides(95%) | Biological Processes | Molecular Functions | PANT |
|----|--------|-------|-------|-------------|------------------------------------------------------|----------------------|---------------|----------------------|---------------------|------|
| 62 | 2.03   | 2.03  | 83.3  | gi 119980   | Ferredoxin                                           | BRANA                | 1             |                      |                     |      |
| 63 | 2.02   | 2.02  | 39.3  | gi 15231... | putative protein [Arabidopsis thaliana]              | Arabidopsis thaliana | 1             |                      |                     |      |
| 64 | 2.02   | 2.02  | 51.1  | gi 15235... | leucyl aminopeptidase - like protein [Arabidopsis... | Arabidopsis thaliana | 2             |                      |                     |      |
| 65 | 2.02   | 2.02  | 44.6  | gi 15222... | 6-phosphogluconate dehydrogenase, putative[A...      | Arabidopsis thaliana | 1             |                      |                     |      |
| 66 | 2.02   | 2.02  | 38.8  | gi 15228... | unknown protein [Arabidopsis thaliana]               | Arabidopsis thaliana | 1             |                      |                     |      |

## Protein Group 62 - Ferredoxin

| Proteins in Group |        |       |             |            | Peptides in Group |      |                          |                                                               |               |         |            |   |    |               |
|-------------------|--------|-------|-------------|------------|-------------------|------|--------------------------|---------------------------------------------------------------|---------------|---------|------------|---|----|---------------|
| N                 | Unu... | Total | Accessio... | Name       | Con...            | Conf | Sequence                 | Modifications                                                 | Cleavages     | ΔMass   | Prec MW    | z | Sc | Spectrum      |
| 62                | 2.03   | 2.03  | gi 119980   | Ferredoxin | 1.70              | 98   | FI TPEGEQEVE CDDDVYVL... | ICAT-C(C)@12<br>ICAT-C(C)@33                                  |               | -0.0157 | 4243.89... | 4 | 14 | 4.1.1.1842.4  |
|                   |        |       |             |            | 0.33              | 53   | VVSGFVDQSDE SFLDDQI...   | Phe->Ser@5<br>ICAT-C(C)@27                                    |               | 0.0381  | 5214.46... | 5 | 14 | 3.1.1.1681.2  |
|                   |        |       |             |            | 0.00              | < 1  | FI TPEGEQEVE CDDDVYVL... | ICAT-C(C)@12                                                  | cleaved Y-... | -0.0196 | 3670.62... | 4 | 10 | 3.1.1.1801.3  |
|                   |        |       |             |            | 0.00              | < 1  | FI TPEGEQEVE CDDDVYVL... | ICAT-C:13C(9)(C)@12                                           | cleaved Y-... | -0.0185 | 3679.65... | 4 | 7  | 2.1.1.1686.4  |
|                   |        |       |             |            | 0.00              | < 1  | FI TPEGEQEVE CDDDVYVL... | Deamidated(Q)@8<br>ICAT-C(C)@12<br>ICAT-C(C)@33               |               | 0.9541  | 4245.84... | 5 | 7  | 3.1.1.1700.4  |
|                   |        |       |             |            | 0.00              | < 1  | FI TPEGEQEVE CDDDVYVL... | Deamidated(Q)@8<br>ICAT-C(C)@12<br>ICAT-C(C)@33               |               | 0.7723  | 4245.66... | 5 | 8  | 11.1.1.2011.2 |
|                   |        |       |             |            | 0.00              | < 1  | FI TPEGEQEVE CDDDVYVL... | Deamidated(Q)@8<br>ICAT-C:13C(9)(C)@12<br>ICAT-C:13C(9)(C)@33 |               | 0.0029  | 4262.95... | 4 | 7  | 2.1.1.1609.3  |
|                   |        |       |             |            | 0.00              | < 1  | FI TPEGEQEVE CDDDVYVL... | Deamidated(Q)@8                                               |               | -0.0879 | 4262.86... | 4 | 8  | 12.1.1.1977.2 |

## Protein Sequence Coverage - Ferredoxin

ATYKVKFITPEGEQEVE CDDDVYVLDAAEAGIDLPYSCRAGSCSSCAGKVVSGFVDQSDE SFLDDQIAEGFVLTCAAYPTSDVTTIETHKEELV

# gi|15240013 33 kDa polypeptide of oxygen-evolving complex in photosystem II

## Proteins Detected

| N  | Unu... | Total | % Cov | Accessio... | Name                                                | Species              | Peptides(95%) | Biological Processes | Molecular Functions | PANT |
|----|--------|-------|-------|-------------|-----------------------------------------------------|----------------------|---------------|----------------------|---------------------|------|
| 7  | 8.04   | 8.04  | 63.3  | gi 15229... | glyceraldehyde-3-phosphate dehydrogenase C...       | Arabidopsis thaliana | 6             |                      |                     |      |
| 8  | 7.31   | 7.31  | 40.6  | gi 15232... | reversibly glycosylated polypeptide-1 [Arabidops... | Arabidopsis thaliana | 6             |                      |                     |      |
| 9  | 6.90   | 6.90  | 57.5  | gi 15227... | tubulin beta-7 chain [Arabidopsis thaliana]         | Arabidopsis thaliana | 4             |                      |                     |      |
| 10 | 6.62   | 6.62  | 80.4  | gi 15240... | 33 kDa polypeptide of oxygen-evolving complex...    | Arabidopsis thaliana | 7             |                      |                     |      |
| 11 | 6.25   | 6.25  | 57.1  | gi 15242... | putative protein [Arabidopsis thaliana]             | Arabidopsis thaliana | 5             |                      |                     |      |

## Protein Group 10 - 33 kDa polypeptide of oxygen-evolving complex (OEC) in photosystem II (emb|CAA75629.1) [Arabidopsis thaliana]

| Proteins in Group |        |       |             |                      | Peptides in Group |      |                        |                                                        |                |         |            |   |    |               |
|-------------------|--------|-------|-------------|----------------------|-------------------|------|------------------------|--------------------------------------------------------|----------------|---------|------------|---|----|---------------|
| N                 | Unu... | Total | Accession # | Name                 | Con...            | Conf | Sequence               | Modifications                                          | Cleavages      | ΔMass   | Prec MW    | z | Sc | Spectrum      |
| 10                | 6.62   | 6.62  | gi 15240013 | 33 kDa polypeptide   | 2.00              | 99   | FCFEPTSFTVK            | ICAT-C(C)@2                                            |                | -0.0741 | 1531.66... | 2 | 14 | 8.1.1.1354.4  |
|                   | 0.00   | 6.61  | gi 49359169 | photosystem II pr... | 2.00              | 99   | GTGTANQCPTIDGGSETFS... | ICAT-C(C)@8                                            |                | -0.0902 | 2626.14... | 3 | 20 | 11.1.1.1525.2 |
|                   | 0.00   | 6.57  | gi 45181461 | photosystem II pr... | 2.00              | 99   | KFCFEPTSFTVK           | ICAT-C:13C(9)(C)@3                                     | missed K-F...  | -0.0811 | 1668.78... | 2 | 16 | 9.1.1.1449.2  |
|                   | 0.00   | 6.56  | gi 5052366  | 33 kDa oxygen ev...  | 0.55              | 72   | KFCFEPTSF              | ICAT-C:13C(9)(C)@3                                     | cleaved F-T... | -0.0628 | 1340.58... | 2 | 12 | 8.1.1.1348.2  |
|                   |        |       |             |                      | 0.02              | 5    | ERVPFLFTVK             | Glu->Ala@1                                             | cleaved G-E... | -0.0505 | 1176.65... | 2 | 13 | 7.1.1.1578.3  |
|                   |        |       |             |                      | 0.01              | 3    | ADSVSKNAPPEFQNTK       | Ser->Oxalanine(S)@3<br>Oxidation(P)@10                 | missed K-N...  | -0.0246 | 1745.79... | 2 | 12 | 12.1.1.1531.3 |
|                   |        |       |             |                      | 0.01              | 2    | ENVKNTAASVGEITLKVTK    | Dioxidation(K)@4<br>Deamidated(N)@5<br>Oxidation(K)@16 | missed K-N...  | 0.8785  | 2050.95... | 3 | 12 | 10.1.1.1403.3 |
|                   |        |       |             |                      | 0.01              | 2    | SLQSTATFLQSAKIATAPS... | Deamidated(R)@20<br>Phospho(S)@22                      | cleaved A-...  | -0.2541 | 2795.14... | 3 | 11 | 12.1.1.1614.2 |
|                   |        |       |             |                      | 0.00              | 1    | IAGFALATSALVVSGASAE... | Formyl@N-term                                          | missed K-R...  | -0.1842 | 2287.03... | 3 | 11 | 2.1.1.1424.4  |

## Protein Sequence Coverage - 33 kDa polypeptide of oxygen-evolving complex (OEC) in photosystem II (emb|CAA75629.1) [Arabidopsis thaliana]

MAASLQSTATFLQSAKIATAPSRGSSHLRSTQAVGKSFGLETSARLTCSFQSDFKDFTGKCSDAVKIAGFALATSALVVSGASAEAGAPKRLTYDEIQSKTYMEVKGTTANQCPTIDGGSETFSFKP  
 GKYAGKKFCFEPTSFTVKADSVSKNAPPEFQNTKLMTRLTYTLDEIEGPFVEASDGSVNFKEEDGIDYAAVTVQLPGGERVFPFLFTVKQLDASGKPDFTGKFLVPSYRGSFLDPKGRGGSTGYDNA  
 VALPAGGRGDEEELVKNVKNNTAASVGEITLKVTKSKPETGEVIGVFESLQPSDIDLAKVPKDVKIQGVWYGGLE

# gi|17852 Ribulose biphosphate carboxylase /oxygenase small subunit

## Proteins Detected

| N | Unu... | Total | % Cov | Accessio... | Name                                               | Species              | Peptides(95%) | Biological Processes | Molecular Functions | PANT |
|---|--------|-------|-------|-------------|----------------------------------------------------|----------------------|---------------|----------------------|---------------------|------|
| 5 | 8.96   | 8.96  | 68.9  | gi 15226... | putative triosephosphate isomerase[Arabidopsi...   | Arabidopsis thaliana | 5             |                      |                     |      |
| 6 | 8.55   | 8.55  | 81.8  | gi 17852    | ribulose biphosphate carboxylase/oxygenase s...    | Brassica napus       | 15            |                      |                     |      |
| 7 | 8.04   | 8.04  | 63.3  | gi 15229... | glyceraldehyde-3-phosphate dehydrogenase C...      | Arabidopsis thaliana | 6             |                      |                     |      |
| 8 | 7.31   | 7.31  | 40.6  | gi 15232... | reversibly glycosylated polypeptide-1[Arabidops... | Arabidopsis thaliana | 6             |                      |                     |      |
| 9 | 6.90   | 6.90  | 57.5  | gi 15227... | tubulin beta-7 chain [Arabidopsis thaliana]        | Arabidopsis thaliana | 4             |                      |                     |      |

## Protein Group 6 - ribulose biphosphate carboxylase /oxygenase small subunit [Brassica napus]

| Proteins in Group |        |       |              |                     | Peptides in Group |      |                       |                                                                       |                |         |            |   |    |              |
|-------------------|--------|-------|--------------|---------------------|-------------------|------|-----------------------|-----------------------------------------------------------------------|----------------|---------|------------|---|----|--------------|
| N                 | Unu... | Total | Accession #  | Name                | Con...            | Conf | Sequence              | Modifications                                                         | Cleavages      | ΔMass   | Prec MW    | z | Sc | Spectrum     |
| 6                 | 8.55   | 8.55  | gi 17852     | ribulose bisphos    | 2.00              | 99   | LPLFGCTDSAQVLK        | ICAT-C:13C(9)(C)@6                                                    |                | -0.1648 | 1726.77... | 2 | 22 | 8.1.1.1351.2 |
| 6                 | 0.00   | 8.55  | gi 132091    | Ribulose bisphos    | 2.00              | 99   | NKWI PCVEFELEHG FVYR  | Lys->Asn@2<br>No ICAT(C)@6                                            | missed K-W...  | -0.0485 | 2251.00... | 3 | 17 | 9.1.1.1534.3 |
|                   | 0.00   | 8.55  | gi 79013990  | chloroplast ribulos | 2.00              | 99   | QVQCIS FIA YKPPS FTGA | Gln->pyro-Glu@N-term<br>ICAT-C:13C(9)(C)@4                            |                | -0.0488 | 2175.06... | 2 | 14 | 8.1.1.1408.4 |
|                   | 0.00   | 8.55  | gi 266891    | Ribulose bisphosp   | 2.00              | 99   | WIPCVEFELEHG FVYR     | ICAT-C:13C(9)(C)@4                                                    |                | -0.0916 | 2259.03... | 3 | 21 | 9.1.1.1526.2 |
|                   | 0.00   | 8.55  | gi 17850     | ribulose bisphosp   | 0.51              | 69   | CISFIA YKPPS FTGA     | ICAT-C:13C(9)(C)@1                                                    | cleaved Q-...  | -0.0564 | 1836.89... | 2 | 13 | 7.1.1.1580.2 |
|                   | 0.00   | 8.54  | gi 119720808 | ribulose bisphosp   | 0.02              | 5    | CTDSAQVLK             | ICAT-C(C)@1                                                           | cleaved G-...  | -0.0234 | 1190.57... | 2 | 11 | 8.1.1.1226.2 |
|                   | 0.00   | 8.54  | gi 17855     | rubisco ssu precun  | 0.01              | 3    | VSCMKVWPPV GKK        | ICAT-C:13C(9)(C)@3<br>Oxidation(M)@4<br>Oxidation(K)@5<br>Lys->Asn@12 | missed K-V...  | 0.0720  | 1711.95... | 4 | 12 | 3.1.1.1505.3 |
|                   | 0.00   | 8.54  | gi 406727    | ribulose-1,5-bisph  | 0.01              | 2    | QVQCIS FIA YKPPS FTG  | Gln->pyro-Glu@N-term<br>ICAT-C:13C(9)(C)@4<br>Gly->Gln@17             | cleaved G-A... | -0.0488 | 2175.06... | 2 | 14 | 8.1.1.1408.4 |
|                   | 0.00   | 8.54  | gi 17852     | ribulose bisphos    | 0.00              | < 1  | PLFGCTDSAQVLK         | Gly->Cys@4<br>ICAT-C:13C(9)(C)@4                                      | cleaved L-P... | -0.0784 | 1895.91... | 2 | 13 | 8.1.1.1434.4 |

## Protein Sequence Coverage - ribulose biphosphate carboxylase /oxygenase small subunit [Brassica napus]

MASSMLSSAAVVTSPAQATMVAPFTGLKSSAAFFVTRKANNDITSIASNGGRVSCMKVWPPVGGKKKFETLSYLPDLTLEVELGKVEDYLLRNKWI PCVEFELEHG FVYREHGSTPGYDGRYWTMWWKLP  
LFGCTDSAQVLKEVQECKTEYPNAFIRIIGFDNNRQVQCISFIA YKPPS FTGA



# gi|15219234 ATPase 70 kDa subunit, putative

## Proteins Detected

| N  | Unu ... | Total | % Cov | Accessio... | Name                                                | Species              | Peptides(95%) | Biological Processes | Molecular Functions | PANT |
|----|---------|-------|-------|-------------|-----------------------------------------------------|----------------------|---------------|----------------------|---------------------|------|
| 10 | 6.62    | 6.62  | 80.4  | gi 15240... | 33 kDa polypeptide of oxygen-evolving complex...    | Arabidopsis thaliana | 7             |                      |                     |      |
| 11 | 6.25    | 6.25  | 57.1  | gi 15242... | putative protein [Arabidopsis thaliana]             | Arabidopsis thaliana | 5             |                      |                     |      |
| 12 | 6.02    | 6.02  | 48.0  | gi 15224... | cytoplasmic aconitate hydratase [Arabidopsis th...  | Arabidopsis thaliana | 7             |                      |                     |      |
| 13 | 6.02    | 6.02  | 60.1  | gi 15225... | succinyl-CoA ligase beta subunit [Arabidopsis th... | Arabidopsis thaliana | 4             |                      |                     |      |
| 14 | 6.01    | 6.01  | 58.6  | gi 15219... | ATPase 70 kDa subunit, putative [Arabidopsis th...  | Arabidopsis thaliana | 6             |                      |                     |      |

## Protein Group 14 - ATPase 70 kDa subunit, putative [Arabidopsis thaliana]

| Proteins in Group |         |       |             |                  | Peptides in Group |        |                        |                                                          |                |         |            |   |    |               |
|-------------------|---------|-------|-------------|------------------|-------------------|--------|------------------------|----------------------------------------------------------|----------------|---------|------------|---|----|---------------|
| N                 | Unu ... | Total | Accession # | Name             | Con... ▾          | Conf ▾ | Sequence ▲             | Modifications ▲                                          | Cleavages      | ΔMass   | Prec MW    | z | Sc | Spectrum      |
| 14                | 6.01    | 6.01  | gi 15219234 | ATPase 70 kDa s  | 2.00              | 99     | EDYLAQNAFIPYDKFCPFYK   | ICAT-C(C)@16                                             | missed K-F...  | -0.0349 | 2686.20... | 3 | 20 | 10.1.1.1471.3 |
|                   | 0.00    | 6.01  | gi 558479   | tonoplast ATPase | 2.00              | 99     | YSNSDAVVYVGCGER        | ICAT-C:13C(9)(C)@12                                      |                | -0.0148 | 1853.85... | 2 | 18 | 2.1.1.1420.3  |
|                   | 0.00    | 6.01  | gi 2493122  | Vacuolar ATP s   | 1.70              | 98     | VLDALFPSVLGGTCAIPGA... | ICAT-C(C)@14<br>ICAT-C(C)@22                             |                | -0.1051 | 2746.31... | 3 | 14 | 8.1.1.1414.3  |
|                   |         |       |             |                  | 0.29              | 49     | VLDALFPSVLGGTCAIPGAF   | ICAT-C(C)@14                                             | cleaved F-G... | -0.0744 | 2174.07... | 3 | 12 | 7.1.1.1671.2  |
|                   |         |       |             |                  | 0.01              | 2      | LEGDSATIQVYEETAGLTV... | Tyr->Gly@11<br>Oxidation(P)@22                           |                | -0.1709 | 2599.12... | 3 | 12 | 2.1.1.1510.3  |
|                   |         |       |             |                  | 0.00              | 1      | NI IHFYNLANQAVER       | Deamidated(N)@1<br>Ile->Val@3<br>Oxidation(N)@10         |                | -0.1415 | 1803.74... | 3 | 11 | 2.1.1.1389.4  |
|                   |         |       |             |                  | 0.00              | 1      | DALFPSVLGGTCAIPGAFG... | Leu->His@8<br>ICAT-C:13C(9)(C)@12<br>ICAT-C:13C(9)(C)@20 | cleaved L-D... | 0.9203  | 2577.22... | 3 | 12 | 8.1.1.1443.3  |
|                   |         |       |             |                  | 0.00              | < 1    | DGIQRPLK               | Oxidation(D)@1                                           | cleaved F-D... | -0.0870 | 941.4424   | 2 | 7  | 6.1.1.1770.4  |
|                   |         |       |             |                  | 0.00              | < 1    | DMGYNVSMMDSTSRWAEA...  | Oxidation(M)@2<br>Deamidated(N)@5<br>Nethiomethyl(M)@9   | missed R-W...  | 0.1046  | 2360.10... | 2 | 9  | 12.1.1.1680.3 |

## Protein Sequence Coverage - ATPase 70 kDa subunit, putative [Arabidopsis thaliana]

MPAFYGGKLTTFEDDEK**ESEYGYVRK**VSGPVVADGMAGAAMYELVRVGHNDLIG**EIRLEGDSATIQVYEETAGLTVNDPVL**RTHKPLSVELGPGILGN**IFDGIQRPLKTIARISGDVYIPRGVSVF**  
**ALDKDCLWEFQPNK**FVEGDTITGGDLATVFENTLMNHLVALPPDAMGKITYIAPAGQYSLKDTVIELEFQGIKSYTMLQSWPVRTPRPVASKLAADTPLL**TGQRVLDALFPSVLGGTCAIPGAFGC**  
**GKTVISQALSKYSNSDAVVYVGCGER**GNEMAEVLMDFPQLTMTLPDGREESVMK**RTLIVANTSNMPVAAREAS**I**TGITIAEYFRDMGYNVSMMDSTSRWAEALREISGR**LAEMPADSGYPAYLAAR  
**LASFYERAGKVKCLGGPER**NGSVTIVGAVSPGGDFSDP**VTSATLSIVQVFWGLDKKLAQRK**HFPSVNWLSYSKYSTALESFYEKFDPDFINIRTKAREVL**QREDDLNEIVQLVGKDALAE**GDKITL  
**ETAKLLRE**DYLAQNA**FIPYDKFCPFYK**SVMMRN**IIHFYNLANQAVERAAGMDGQKITTYTLIK**HRLGDLFYRLVLSQ**KFEDPAEGEDTLVEK**FKKLYDDL**NAGFR**ALEDETR

# gi|15229231 Glyceraldehyde-3-phosphate dehydrogenase C subunit (GapC)

## Proteins Detected

| N | Unu... | Total | % Cov | Accessio... | Name                                                | Species              | Peptides(95%) | Biological Processes | Molecular Functions | PANT |
|---|--------|-------|-------|-------------|-----------------------------------------------------|----------------------|---------------|----------------------|---------------------|------|
| 4 | 9.45   | 9.45  | 66.2  | gi 60686... | oxalic acid oxidase [Brassica napus]                | Brassica napus       | 6             |                      |                     |      |
| 5 | 8.96   | 8.96  | 68.9  | gi 15226... | putative triosephosphate isomerase [Arabidopsi...   | Arabidopsis thaliana | 5             |                      |                     |      |
| 6 | 8.55   | 8.55  | 81.8  | gi 17852... | ribulose biphosphate carboxylase/oxygenase s...     | Brassica napus       | 15            |                      |                     |      |
| 7 | 8.04   | 8.04  | 63.3  | gi 15229... | glyceraldehyde-3-phosphate dehydrogenase C...       | Arabidopsis thaliana | 6             |                      |                     |      |
| 8 | 7.31   | 7.31  | 40.6  | gi 15232... | reversibly glycosylated polypeptide-1 [Arabidops... | Arabidopsis thaliana | 6             |                      |                     |      |

## Protein Group 7 - glyceraldehyde-3-phosphate dehydrogenase C subunit (GapC) [Arabidopsis thaliana]

| Proteins in Group |        |       |             |                                                           | Peptides in Group |      |                          |                              |                |         |            |   |    |               |  |
|-------------------|--------|-------|-------------|-----------------------------------------------------------|-------------------|------|--------------------------|------------------------------|----------------|---------|------------|---|----|---------------|--|
| N                 | Unu... | Total | Accession # | Name                                                      | Con...            | Conf | Sequence                 | Modifications                | Cleavages      | ΔMass   | Prec MW    | z | Sc | Spectrum      |  |
| 7                 | 8.04   | 8.04  | gi 15229231 | glyceraldehyde-3-phosphate dehydrogenase C subunit (GapC) | 2.00              | 99   | DAPMFVVGVEHEYK           | Dethiomethyl(M)@4            |                | -0.0091 | 1685.79... | 3 | 24 | 2.1.1.1413.3  |  |
|                   | 0.00   | 8.04  | gi 1522848  | glyceraldehyde-3-phosphate dehydrogenase C subunit (GapC) | 2.00              | 99   | GGRAAS FNI IPSSTGAAK     | Arg->GluSA(R)@3              | missed R-A...  | -0.0465 | 1660.79... | 2 | 18 | 9.1.1.1433.3  |  |
|                   |        |       |             |                                                           | 2.00              | 99   | SDLDIVSNASCTTNCLAPL...   | ICAT-C(C)@11<br>ICAT-C(C)@15 |                | -0.0993 | 2589.17... | 3 | 14 | 12.1.1.1641.2 |  |
|                   |        |       |             |                                                           | 2.00              | 99   | TLLFGEKPVIVF             |                              | cleaved F-G... | -0.0503 | 1349.70... | 2 | 15 | 7.1.1.1589.2  |  |
|                   |        |       |             |                                                           | 0.02              | 4    | IRIGINGFGR               | Arg->Asn@2                   | missed R-I@2   | -0.0213 | 1059.56... | 2 | 11 | 7.1.1.1522.4  |  |
|                   |        |       |             |                                                           | 0.01              | 3    | GGRAAS FNI IPSSTGAAKA... | Deamidated(N)@8              | missed R-A...  | -0.2246 | 2059.87... | 4 | 10 | 11.1.1.1446.4 |  |
|                   |        |       |             |                                                           | 0.01              | 2    | KVVISAPSK                | Trimethyl(K)@1<br>Val->Arg@2 | missed K-V...  | -0.0615 | 1026.59... | 2 | 13 | 8.1.1.1252.4  |  |
|                   |        |       |             |                                                           | 0.00              | 1    | ADKKIR                   | Deamidated(R)@6              | cleaved M...   | -0.0977 | 730.3361   | 1 | 6  | 5.1.1.2076.4  |  |
|                   |        |       |             |                                                           | 0.00              | <1   | CLAPLAK                  | ICAT-C:13C(9)(C)@1           | cleaved N-C... | -0.0462 | 950.5209   | 2 | 10 | 8.1.1.1272.2  |  |
|                   |        |       |             |                                                           | 0.00              | <1   | AASFNI IPSSTGAAK         |                              |                | -0.0378 | 1433.71... | 2 | 5  | 1.1.1.1942.3  |  |
|                   |        |       |             |                                                           | 0.00              | <1   | AASFNI IPSSTGAAK         |                              |                | -0.0617 | 1433.68... | 2 | 7  | 2.1.1.1844.2  |  |
|                   |        |       |             |                                                           | 0.00              | <1   | AASFNI IPSSTGAAK         |                              |                | 0.1566  | 1433.90... | 2 | 5  | 5.1.1.1940.3  |  |

## Protein Sequence Coverage - glyceraldehyde-3-phosphate dehydrogenase C subunit (GapC) [Arabidopsis thaliana]

MADKKIRIGINGFGRIGRLVARVVLQRDDVELVAVNDPFITTEYMTYMFKYDVSVHGQWKHNLKIKKDEK**TLLFGEKPVIVF**GIRN**PE**DI**PWAEAGADYVVE**STGVFTDKDKAAAHLKGGAK**KVVISAP**  
**SKDAPMFVVGVEHEYK**SDLDIVSNASCTTNCLAPLAK**VINDR**FGIVEGLMTTVHSITATQKTVDGSPMK**DWRG**GRAAS**FNI IPSSTGAAKAVGKVL**PALNGKLTGMSFRVPTVDVSVVDLTVRLEKA  
 ATYDEIKKAIKEESEGL**KGILGYTEDD**VVSTDFVGDNRSSIFDAKAGIALSDK**FV**KLVS**WYDNE**WGYSSRVVDLIVHMSKA

# gi|15232776 Putative transitional endoplasmic reticulum ATPase

## Proteins Detected

| N  | Unu... | Total | % Cov | Accessio... | Name                                               | Species              | Peptides(95%) | Biological Processes | Molecular Functions | PANT |
|----|--------|-------|-------|-------------|----------------------------------------------------|----------------------|---------------|----------------------|---------------------|------|
| 17 | 4.49   | 4.49  | 62.1  | gi 15240... | succinate dehydrogenase flavoprotein alpha sub...  | Arabidopsis thaliana | 5             |                      |                     |      |
| 18 | 4.46   | 4.46  | 65.0  | gi 15232... | putative transitional endoplasmic reticulum ATP... | Arabidopsis thaliana | 2             |                      |                     |      |
| 19 | 4.29   | 4.29  | 35.8  | gi 15233... | cytosolic triosephosphatisomerase [Arabidopsis...  | Arabidopsis thaliana | 4             |                      |                     |      |
| 20 | 4.16   | 4.16  | 38.1  | gi 15234... | P-Protein - like protein [Arabidopsis thaliana]    | Arabidopsis thaliana | 1             |                      |                     |      |
| 21 | 4.15   | 6.75  | 53.1  | gi 14722... | unnamed protein product [Brassica napus]           | Brassica napus       | 6             |                      |                     |      |

## Protein Group 18 - putative transitional endoplasmic reticulum ATPase [Arabidopsis thaliana]

| Proteins in Group |        |       |             |                     | Peptides in Group |      |                        |                                                                  |                |         |            |   |    |               |
|-------------------|--------|-------|-------------|---------------------|-------------------|------|------------------------|------------------------------------------------------------------|----------------|---------|------------|---|----|---------------|
| N                 | Unu... | Total | Accession # | Name                | Con...            | Conf | Sequence               | Modifications                                                    | Cleavages      | ΔMass   | Prec MW    | z | Sc | Spectrum      |
| 18                | 4.46   | 4.46  | gi 15232776 | putative transitio  | 2.00              | 99   | GVLFGYPPGCGK           | ICAT-C:13C(9)(C)@10                                              |                | -0.0499 | 1429.69... | 2 | 14 | 8.1.1.1321.3  |
|                   | 0.00   | 4.31  | gi 15242723 | putative protein [A | 2.00              | 99   | QSAPCVLFFDELDSIATQR    | Gln->pyro-Glu@N-term<br>ICAT-C:13C(9)(C)@5                       |                | 0.0016  | 2358.16... | 3 | 16 | 10.1.1.1661.2 |
|                   | 0.00   | 4.31  | gi 15231775 | CDC48 - like prote  | 0.31              | 51   | ARQSAPCVLFFDELDSIAT... | Deamidated(R)@2<br>Deamidated(Q)@3<br>Pro->Ser@6<br>No ICAT(C)@7 | missed R-Q...  | 0.0467  | 2358.16... | 3 | 18 | 10.1.1.1661.2 |
|                   |        |       |             |                     | 0.14              | 28   | FFDELDSIATQRGGGSGGD... |                                                                  | cleaved L-F... | -1.8506 | 2510.27... | 3 | 13 | 2.1.1.1590.4  |
|                   |        |       |             |                     | 0.01              | 2    | DELDSIATQRGGGSGGDG...  | Ser->Gly@14<br>Dehydrated(D)@23                                  | cleaved F-...  | -0.0222 | 2169.94... | 4 | 13 | 11.1.1.1456.3 |
|                   |        |       |             |                     | 0.00              | 1    | DQLIYIPLPDEDSR         | Deamidated(Q)@2<br>Oxidation(P)@7<br>Dehydrated(E)@11            | cleaved L-D... | 0.1090  | 1671.90... | 4 | 11 | 2.1.1.1387.4  |
|                   |        |       |             |                     | 0.00              | <1   | IIGATNR                |                                                                  | cleaved F-L... | -0.1011 | 743.3279   | 1 | 7  | 7.1.1.1690.2  |
|                   |        |       |             |                     | 0.00              | <1   | AALRKSPIAKVDIGALAK     | Oxidation(D)@13<br>Oxidation(K)@19                               | missed R-K...  | -0.1299 | 1968.00... | 3 | 8  | 3.1.1.1514.3  |
|                   |        |       |             |                     | 0.00              | <1   | AALRKSPIAKVDIGALAK     | Oxidation(P)@7                                                   | missed R-K...  | -0.1317 | 1968.00... | 3 | 9  | 2.1.1.1427.4  |

## Protein Sequence Coverage - putative transitional endoplasmic reticulum ATPase [Arabidopsis thaliana]

MSTPAESSDSKSKKDFSTAILERKKSPLNRVVDEAINDDNSVSLHPATMEKQLFRGDTILIKGKRRKDTVCIALADETCEEPKIRMNKVRSNLRVRLGDVIVSHQCPDVKYGKRVHILPVDDTIVE  
 GVTGNLFDAYLKPYLEAYRPVRKGDLLVLRGGMRSVEFKVIETDPAEYCVVAPDTEIFCEGEPVRRDEEERLDDVGYDDVGGVRRQMAQIRELVLPRLHPQLFKSIGVKPPKGIILYGGPPGSGKTL  
 IARAVANETGAFFFCINGPEIMSKLAGESESNLRKAFEEAEKNAPSIIFIDEIDSIAPKREKTNGEVERRIVSLLTMDGLKSRHVIVMGATNRPNSIDPALRRFRGRDREIDIGVPEIGRLEVL  
 RIHTKMKLAEDVDLERSISKDTHGVYGADLAALCTEALQCIREKMDVIDLEDSDSIDAEILNSMAVTNEHFHTALGNSNPSALRETVVEVPNVSWNDIGGLENVKRELQETVQYPVEHPEKFEKFGMS  
 PSKGVLFYGGPPGCGKTLAKAIANECQANFISVKGPELLTMWFGSEANVREIFDKARQSAPCVLFFDELDSIATQRGGGSGDGGGAADRVLNQLLTEMGMNAKKTVFIIGATNRPDIIDSALLRP  
 GRLDQLIYIPLPDEDSRLNI FKAALRKSPIAKVDIGALAKYTQGFSGADITEICQRACKYAIRENIEKDIEKRRSENPEAMEEDGVDEVSETKAAHFEE SMK YARRSVSDADIRKYQAFQTLQQ  
 SRFGSEFRFENSAGSGATTGVADPFATSAAGDDDDLYN

# gi|15233272 Cytosolic triosephosphatisomerase

## Proteins Detected

| N  | Unu... | Total | % Cov | Accessio... | Name                                                   | Species              | Peptides(95%) | Biological Processes | Molecular Functions | PANTHER ID |
|----|--------|-------|-------|-------------|--------------------------------------------------------|----------------------|---------------|----------------------|---------------------|------------|
| 8  | 9.78   | 9.78  | 62.4  | gi 8745523  | ATP synthase beta subunit [Brassica napus]             | Brassica napus       | 6             |                      |                     |            |
| 9  | 8.91   | 8.91  | 68.9  | gi 899226   | malate dehydrogenase [Brassica napus]                  | Brassica napus       | 6             |                      |                     |            |
| 10 | 8.16   | 8.16  | 43.7  | gi 15239... | tubulin beta-6 chain (sp P29514) [Arabidopsis tha...]  | Arabidopsis thaliana | 4             |                      |                     |            |
| 11 | 7.72   | 7.72  | 62.2  | gi 15233... | cytosolic triosephosphatisomerase [Arabidopsis t...]   | Arabidopsis thaliana | 5             |                      |                     |            |
| 12 | 7.46   | 7.46  | 40.9  | gi 15222... | tubulin alpha-2/alpha-4 chain, putative [Arabidops...] | Arabidopsis thaliana | 4             |                      |                     |            |
| 13 | 6.70   | 6.70  | 72.1  | gi 15234... | peptidylprolyl isomerase ROC1 [Arabidopsis thali...]   | Arabidopsis thaliana | 4             |                      |                     |            |

## Protein Group 11 - cytosolic triosephosphatisomerase [Arabidopsis thaliana]

| Proteins in Group |        |       |             |                         |                   | Peptides in Group |      |                         |                                            |               |        |            |
|-------------------|--------|-------|-------------|-------------------------|-------------------|-------------------|------|-------------------------|--------------------------------------------|---------------|--------|------------|
| N                 | Unu... | Total | Accessio... | Name                    | Species           | Con...            | Conf | Sequence                | Modifications                              | Cleavages     | ΔMass  | Prec MW    |
| 11                | 7.72   | 7.72  | gi 15233... | cytosolic triosephos... | Arabidopsis th... | 2.00              | 99   | IIYGGSVNGGNCK           | Deamidated(N)@8<br>ICAT-C:13C(9)(C)@12     |               | 0.1993 | 1517.95... |
|                   |        |       |             |                         |                   | 2.00              | 99   | VAYALAQGLKVIACVGET L... | Lys->Ser@10<br>ICAT-C(C)@14<br>Glu->Lys@21 | missed K-V... | 0.2225 | 2517.58... |
|                   |        |       |             |                         |                   | 2.00              | 99   | VIACVGETLEER            | ICAT-C(C)@4<br>Glu->Gln@11                 |               | 0.1885 | 1543.99... |
|                   |        |       |             |                         |                   | 1.70              | 98   | GKVASPAQAQEVHDELRLK     | Trimethyl(K)@2                             | cleaved T-... | 0.2133 | 2004.28... |
|                   |        |       |             |                         |                   | 0.02              | 4    | VAYALAQGLK              | Tyr->Trp@3<br>Deamidated(Q)@7              |               | 0.1042 | 1056.70... |
|                   |        |       |             |                         |                   | 0.00              | 1    | AKNVSADVAATTR           | Deamidated(N)@3                            | cleaved L-... | 0.1334 | 1303.80... |
|                   |        |       |             |                         |                   | 0.00              | 1    | IIYGGSVNGGNCKE L        | Deamidated(N)@8<br>Cys->Pro@12             | cleaved L-... | 0.1863 | 1517.95... |
|                   |        |       |             |                         |                   | 0.00              | < 1  | ELGGQADVDFLVGGASLKP     | Deamidated(Q)@5                            | cleaved P-... | 0.3087 | 1930.27... |
|                   |        |       |             |                         |                   | 0.00              | < 1  | ELGGQADVDFLVGGASLK...   |                                            |               | 0.2530 | 2787.72... |
|                   |        |       |             |                         |                   | 0.00              | < 1  | ELGGQADVDFLVGGASLK...   | Deamidated(Q)@5<br>Phe->Met@11             | missed K-A... | 0.2447 | 3270.95... |
|                   |        |       |             |                         |                   | 0.00              | < 1  | IIYGGSVNGGNCK           | Deamidated(N)@11<br>ICAT-C(C)@12           |               | 0.1796 | 1892.13... |

## Protein Sequence Coverage - cytosolic triosephosphatisomerase [Arabidopsis thaliana]

MARKFFVGGNWKCNNGTAAEEVKIVNTLN~~EAQVPSQDVVEVVSPYVFLP~~LVKSTLRSDFVAAQNCVWKKGGGAFTGEVSAEMLVNLDI~~PWVILGHSERR~~AILNESSEFVGD~~KVAYALAQGLKVIACV~~  
~~GETLEEREAGSTMDVVA~~AQT~~KAIADR~~V~~TNWSNVVIA~~YEPVWAI~~IGT~~GKVASPAQAQEVHDELRLK~~W~~LAKNVSADVAAT~~TR~~IIYGGSVNGGNCKELGGQADVDFLVGGASLKPEFIDIIKAAEVK~~KSA~~

# gi|15237260 Succinyl-CoA synthetase, alpha subunit

## Proteins Detected

| N  | Unu... | Total | % Cov | Accessio... | Name                                               | Species              | Peptides(95%) | Biological Processes | Molecular Functions | PANT |
|----|--------|-------|-------|-------------|----------------------------------------------------|----------------------|---------------|----------------------|---------------------|------|
| 56 | 2.08   | 2.08  | 42.6  | gi 15227... | putative non-LTR retroelement reverse transcrip... | Arabidopsis thaliana | 1             |                      |                     |      |
| 57 | 2.07   | 2.07  | 60.7  | gi 15237... | succinyl-CoA synthetase, alpha subunit [Arabido... | Arabidopsis thaliana | 2             |                      |                     |      |
| 58 | 2.07   | 2.07  | 44.0  | gi 15242... | NADH dehydrogenase [Arabidopsis thaliana]          | Arabidopsis thaliana | 2             |                      |                     |      |
| 59 | 2.06   | 2.06  | 39.2  | gi 15222... | vacuolar ATP synthase subunit C, putative [Arab... | Arabidopsis thaliana | 1             |                      |                     |      |
| 60 | 2.03   | 2.03  | 56.6  | gi 31043... | glutamate-cysteine ligase [Brassica juncea]        | Brassica juncea      | 1             |                      |                     |      |

## Protein Group 57 - succinyl-CoA synthetase, alpha subunit [Arabidopsis thaliana]

| Proteins in Group |        |       |             |                                                               | Peptides in Group |      |                              |                                                                    |                |         |            |   |    |               |
|-------------------|--------|-------|-------------|---------------------------------------------------------------|-------------------|------|------------------------------|--------------------------------------------------------------------|----------------|---------|------------|---|----|---------------|
| N                 | Unu... | Total | Accession # | Name                                                          | Con...            | Conf | Sequence                     | Modifications                                                      | Cleavages      | ΔMass   | Prec MW    | z | Sc | Spectrum      |
| 57                | 2.07   | 2.07  | gi 15237260 | succinyl-CoA synthetase, alpha subunit [Arabidopsis thaliana] | 2.00              | 99   | LI GPNC PGI IKPGECK          | ICAT-C:13C(9)(C)@6<br>ICAT-C:13C(9)(C)@15                          |                | -0.0740 | 2110.10... | 3 | 20 | 9.1.1.1409.2  |
|                   | 0.00   | 2.00  | gi 15241592 | succinyl-CoA-ligase, alpha subunit [Arabidopsis thaliana]     | 0.07              | 14   | LLGS LRHSGGGCSGSSK           | Gly->Ala@9<br>ICAT-C(C)@12                                         | missed R-H...  | -0.1354 | 1842.80... | 2 | 12 | 11.1.1.1468.4 |
|                   |        |       |             |                                                               | 0.00              | < 1  | ENGTDKPVVAFIAGLTAPP...       |                                                                    |                | -0.2470 | 2108.87... | 3 | 8  | 10.1.1.1359.3 |
|                   |        |       |             |                                                               | 0.00              | < 1  | ENGTDKPVVAFIAGLTAPP...       | Glu->pyro-Glu@N-term                                               | missed R-R...  | -0.2362 | 2246.97... | 3 | 8  | 12.1.1.1480.2 |
|                   |        |       |             |                                                               | 0.00              | < 1  | GHAGAI VSGGK                 |                                                                    | cleaved M...   | -0.0612 | 952.4479   | 2 | 7  | 7.1.1.1655.2  |
|                   |        |       |             |                                                               | 0.00              | < 1  | HSGGGCSGSSK                  | ICAT-C(C)@6                                                        |                | 0.0712  | 1189.58... | 2 | 6  | 6.1.1.1717.4  |
|                   |        |       |             |                                                               | 0.00              | < 1  | HSGGGCSGSSK                  | No ICAT(C)@6<br>Oxidation(K)@11                                    |                | 0.2425  | 978.6251   | 2 | 9  | 7.1.1.1607.3  |
|                   |        |       |             |                                                               | 0.00              | < 1  | HSGGGCSGSSK VCS L T S L V... | ICAT-C(C)@6<br>ICAT-C(C)@13<br>Deamidated(R)@22<br>Oxidation(F)@24 | cleaved F...   | 0.0279  | 2841.36... | 4 | 7  | 7.1.1.1834.2  |
|                   |        |       |             |                                                               | 0.00              | < 1  | IGEI GGTA E E D A A A L I    | Oxidation(D)@11                                                    | cleaved L-I... | -0.0785 | 1544.67... | 2 | 7  | 9.1.1.1596.4  |
|                   |        |       |             |                                                               | 0.00              | < 1  | IGEI GGTA E E D A A A L I    | Oxidation(D)@11                                                    | cleaved L-I... | -0.0538 | 1544.70... | 2 | 8  | 10.1.1.1745.2 |

## Protein Sequence Coverage - succinyl-CoA synthetase, alpha subunit [Arabidopsis thaliana]

MSRQVTRLLGSLRHSGGGCSGSSKVCSLTSLVQSRSGFTTPPPAAVFVDKNTNRVICQGITKNGTFHTEQAIEYGTKMVAGVTPKKGGTEHLGLPVFNIVAEAKAETKANASVIYVPAPFAAAAIME  
GLAAELDLIVCITEGIPQHD MVRVKAALNSQSKTRLIGPNC PGI IKPGECKIGIMPGYIHKPGKIGIVSRSGTLTYEAVFQTTAVGLGQSTCVGIGDPPNGTNFVDCLEKFFVDPQTEGIVLIGEIG  
GTA E E D A A A L I K E N G T D K P V V A F I A G L T A P P G R R M G H A G A I V S G G K G T A Q D K I K S L R D A G V K V V E S P A K I G A A M F E L F Q E R G L L K

# gi|899226 Malate dehydrogenase, mitochondrial precursor

## Proteins Detected

| N | Unu... | Total | % Cov | Accessio... | Name                                               | Species                          | Peptides(95%) | Biological Processes | Molecular Functions | PANT |
|---|--------|-------|-------|-------------|----------------------------------------------------|----------------------------------|---------------|----------------------|---------------------|------|
| 1 | 45.88  | 45.88 | 90.5  | gi 62131... | myrosinase [Brassica rapa var. parachinensis]      | Brassica rapa var. parachinensis | 68            |                      |                     |      |
| 2 | 27.80  | 27.80 | 67.6  | gi 8745521  | ribulose-1,5-bisphosphate carboxylase/oxygenase... | Brassica napus                   | 31            |                      |                     |      |
| 3 | 10.32  | 10.32 | 86.5  | gi 899226   | malate dehydrogenase [Brassica napus]              | Brassica napus                   | 7             |                      |                     |      |
| 4 | 9.45   | 9.45  | 66.2  | gi 60686... | oxalic acid oxidase [Brassica napus]               | Brassica napus                   | 6             |                      |                     |      |
| 5 | 8.96   | 8.96  | 68.9  | gi 15226... | putative triosephosphate isomerase [Arabidopsi...  | Arabidopsis thaliana             | 5             |                      |                     |      |

## Protein Group 3 - malate dehydrogenase [Brassica napus]

| Proteins in Group |        |       |             |                 | Peptides in Group |      |                        |                                                                                        |                |         |            |   |    |              |
|-------------------|--------|-------|-------------|-----------------|-------------------|------|------------------------|----------------------------------------------------------------------------------------|----------------|---------|------------|---|----|--------------|
| N                 | Unu... | Total | Accession # | Name            | Con...            | Conf | Sequence               | Modifications                                                                          | Cleavages      | ΔMass   | Prec MW    | z | Sc | Spectrum     |
| 3                 | 10.32  | 10.32 | gi 899226   | malate dehydrog | 2.00              | 99   | AGKGSATLSMAYAGALFAD... | Ala->Gly@1<br>Oxidation(K)@3<br>Phospho(S)@5<br>Oxidation(M)@10<br>ICAT-C:13C(9)(C)@21 | missed K...    | -0.0028 | 2550.19... | 3 | 22 | 9.1.1.1483.3 |
|                   |        |       |             |                 | 2.00              | 99   | GLNGVPDVECSYVQSTIT...  | ICAT-C:13C(9)(C)@11                                                                    |                | -0.0812 | 3135.50... | 3 | 15 | 9.1.1.1590.3 |
|                   |        |       |             |                 | 2.00              | 99   | VAILGAAGGIGQPLALLMK    | Oxidation(M)@18                                                                        |                | -0.0257 | 1808.03... | 3 | 15 | 7.1.1.1602.4 |
|                   |        |       |             |                 | 2.00              | 99   | YCPHALVNMISNPVNSTVP... | ICAT-C(C)@2<br>Oxidation(M)@9                                                          |                | -0.0637 | 3070.49... | 3 | 22 | 9.1.1.1517.2 |
|                   |        |       |             |                 | 2.00              | 99   | YCPHALVNMISNPVNSTVP... | ICAT-C:13C(9)(C)@2<br>Oxidation(M)@9                                                   | missed K-K...  | -0.0154 | 3207.67... | 3 | 19 | 9.1.1.1493.3 |
|                   |        |       |             |                 | 0.29              | 49   | SALVRSASAKQSLLR        | Lys->Allysine(K)@11<br>Deamidated(R)@16                                                | missed R-S...  | -0.0954 | 1672.81... | 2 | 13 | 2.1.1.1574.2 |
|                   |        |       |             |                 | 0.02              | 3    | ARYCPHALVNMISNPVNST... | Formyl@N-term<br>No ICAT(C)@4<br>Oxidation(M)@11                                       | cleaved I-A... | -0.0935 | 3070.46... | 4 | 16 | 9.1.1.1519.4 |
|                   |        |       |             |                 | 0.00              | 1    | RSALVRSSASAK           | Arg->Thr@6                                                                             | cleaved F...   | 0.0228  | 1176.66... | 2 | 11 | 8.1.1.1309.2 |

## Protein Sequence Coverage - malate dehydrogenase [Brassica napus]

MFRSALVRSASAKQSLRLRSFSSGSVPERKVAILGAAGGIGQPLALLMKLNPLVSSLSLYDIANTPGVAADVGHINTRSQVVGVMGDDNLAKALEGADLVIIPAGVPRKPGMTRDDLFNINAGIVKNLWSAIAKYCPHALVNMISNPVNSTVPIAAEIFKKAGMYDEKKLFGVITLDVVRVKTSYAGKANVPVAEVNVPVAVGHAGVTIILPLFSQATPQAILSGDALVTTKRTQDGGTEVEEAKAGKGSATLSMAYAGALFADACLKGLNGVPDVECSYVQSTITELPFASKVRLGKNGVEEVLDLGPLSDFEKEGLEALRPGIKSTIEKGVKFNQ

# gi|15240075 Succinate dehydrogenase flavoprotein alpha subunit

## Proteins Detected

| N  | Unu... | Total | % Cov | Accessio... | Name                                               | Species              | Peptides(95%) | Biological Processes | Molecular Functions | PANT |
|----|--------|-------|-------|-------------|----------------------------------------------------|----------------------|---------------|----------------------|---------------------|------|
| 15 | 5.75   | 5.75  | 44.2  | gi 15225... | hypothetical protein [Arabidopsis thaliana]        | Arabidopsis thaliana | 4             |                      |                     |      |
| 16 | 5.49   | 5.49  | 57.6  | gi 15238... | 5-methyltetrahydropteroyltriglutamate-homocyst...  | Arabidopsis thaliana | 5             |                      |                     |      |
| 17 | 4.49   | 4.49  | 62.1  | gi 15240... | succinate dehydrogenase flavoprotein alpha sub...  | Arabidopsis thaliana | 5             |                      |                     |      |
| 18 | 4.46   | 4.46  | 65.0  | gi 15232... | putative transitional endoplasmicreticulum ATP...  | Arabidopsis thaliana | 2             |                      |                     |      |
| 19 | 4.29   | 4.29  | 35.8  | gi 15233... | cytosolic triosephosphatis omerase [Arabidopsis... | Arabidopsis thaliana | 4             |                      |                     |      |

## Protein Group 17 - succinate dehydrogenase flavoprotein alpha subunit (emb|CAA05025.1) [Arabidopsis thaliana]

| Proteins in Group |        |       |             |                 | Peptides in Group |      |                        |                                                   |               |         |            |   |    |               |
|-------------------|--------|-------|-------------|-----------------|-------------------|------|------------------------|---------------------------------------------------|---------------|---------|------------|---|----|---------------|
| N                 | Unu... | Total | Accession # | Name            | Con...            | Conf | Sequence               | Modifications                                     | Cleavages     | ΔMass   | Prec MW    | z | Sc | Spectrum      |
| 17                | 4.49   | 4.49  | gi 15240075 | succinate dehyd | 2.00              | 99   | AAIGLSEHGNTACITK       | ICAT-C:13C(9)(C)@14                               |               | -0.0135 | 1968.00... | 3 | 14 | 2.1.1.1427.4  |
|                   |        |       |             |                 | 2.00              | 99   | TQETLEEGCQLIDK         | ICAT-C(C)@9                                       |               | -0.1059 | 1832.77... | 2 | 15 | 12.1.1.1529.3 |
|                   |        |       |             |                 | 0.29              | 49   | PLQDLEFVQFHPTGIYAG...  | NeuAc(T)@13<br>ICAT-C(C)@20                       | cleaved L-... | -0.0542 | 3465.62... | 4 | 14 | 10.1.1.1567.4 |
|                   |        |       |             |                 | 0.11              | 22   | AGLPLQDLEFVQFHPTGIY... | Gly->Pro@2<br>ICAT-C:13C(9)(C)@23                 |               | -0.0572 | 3464.72... | 4 | 13 | 3.1.1.1675.2  |
|                   |        |       |             |                 | 0.06              | 13   | GDDPDAVIPGLMAAGEAAC... | Ile->Thr@8<br>Oxidation(M)@12<br>ICAT-C(C)@19     |               | -0.0891 | 2795.17... | 3 | 13 | 11.1.1.1597.2 |
|                   |        |       |             |                 | 0.02              | 4    | QKPLEKDAGEKTIAWL       | Deamidated(Q)@1<br>Oxidation(P)@3                 | cleaved L-... | -0.1711 | 1842.80... | 2 | 11 | 11.1.1.1468.4 |
|                   |        |       |             |                 | 0.01              | 2    | FRSSQTI LATGGYGR       | Ala->Val@9                                        | missed R-S... | -0.1549 | 1640.70... | 2 | 11 | 8.1.1.1324.3  |
|                   |        |       |             |                 | 0.00              | 99   | AAIGLSEHGNTACITK       | Glu->Asp@7<br>Methyl(T)@12<br>ICAT-C:13C(9)(C)@14 |               | -0.0117 | 1968.00... | 3 | 17 | 3.1.1.1514.3  |
|                   |        |       |             |                 | 0.00              | 96   | AAIGLSEHGNTACITK       | ICAT-C:13C(9)(C)@14                               |               | -0.0488 | 1967.96... | 3 | 15 | 9.1.1.1425.3  |

## Protein Sequence Coverage - succinate dehydrogenase flavoprotein alpha subunit (emb|CAA05025.1) [Arabidopsis thaliana]

MWRCVSRGFRAPASKTSSLFDGVSGRFRFRFFSTGSTDTRSSYITVDHTYDAVVVGAGGAGLRAAIGLSEHGNTACITKLFPTRSHTVAAQGGINAALGNMSEDDWRWHMYDITVKGSDWLGDQDAIQ  
 YMCREAPKAVIELENYGLPFSRTEEGKIYQRAFGGQSLDFGKGGQAYRCACAADRTGHALLHTLYGQAMKHTQFFVEYFALDLLMASDGSCQGVIALNMGDGLHRFRSSQTI LATGGYGRAYFSAT  
 SAHTCTGDGNAMVARAGLPLQDLEFVQFHPTGIYAGCLITEGSRGEGGILRNSEGERFMERYAPTAKDLASRDVVSRSMTMEIREGRGVGPHKDHIYHLNHLPPPEVLKERLPGISETAAIFAGVDV  
 TKEPIPVLPVHYNMGGIPNTYHGEVVTIKGDDPDAVIPGLMAAGEAACASVHGANRLGANSLLDIVVFGACANRVAEISKPEKQKPLEKDAGEKTIAWLDRLRNSNGSLPTSTIRLNMQRIMQNN  
 AAVFRTQETLEEGCQLIDKAWESFGDVQVKDRSMIWNSDLIETLELENLLINASITMHSAEARKE SRGAHAREDFTKREDGEWMKHTLGYWEDEKVRLDYRPVHMDTLDDEIDTFPPKARVY

# gi|15232865 Reversibly glycosylated polypeptide-1

## Proteins Detected

| N  | Unu... | Total | % Cov | Accessio... | Name                                                | Species              | Peptides(95%) | Biological Processes | Molecular Functions | PANT |
|----|--------|-------|-------|-------------|-----------------------------------------------------|----------------------|---------------|----------------------|---------------------|------|
| 6  | 8.55   | 8.55  | 81.8  | gi 17852    | ribulose biphosphate carboxylase/oxygenase s...     | Brassica napus       | 15            |                      |                     |      |
| 7  | 8.04   | 8.04  | 63.3  | gi 15229... | glyceraldehyde-3-phosphate dehydrogenase C...       | Arabidopsis thaliana | 6             |                      |                     |      |
| 8  | 7.31   | 7.31  | 40.6  | gi 15232... | reversibly glycosylated polypeptide-1 [Arabidops... | Arabidopsis thaliana | 6             |                      |                     |      |
| 9  | 6.90   | 6.90  | 57.5  | gi 15227... | tubulin beta-7 chain [Arabidopsis thaliana]         | Arabidopsis thaliana | 4             |                      |                     |      |
| 10 | 6.62   | 6.62  | 80.4  | gi 15240... | 33kDa polypeptide of oxygen-evolving complex...     | Arabidopsis thaliana | 7             |                      |                     |      |

## Protein Group 8 - reversibly glycosylated polypeptide-1 [Arabidopsis thaliana]

| Proteins in Group |        |       |             |                   | Peptides in Group |      |                                     |                                                           |               |         |            |   |    |              |  |
|-------------------|--------|-------|-------------|-------------------|-------------------|------|-------------------------------------|-----------------------------------------------------------|---------------|---------|------------|---|----|--------------|--|
| N                 | Unu... | Total | Accession # | Name              | Con...            | Conf | Sequence                            | Modifications                                             | Cleavages     | ΔMass   | Prec MW    | z | Sc | Spectrum     |  |
| 8                 | 7.31   | 7.31  | gi 15232865 | reversibly glycos | 2.00              | 99   | GT L F P M C G M N L A F D R        | Oxidation(M)@6<br>ICAT-C:13C(9)(C)@7<br>Oxidation(N)@10   |               | -0.0481 | 1939.85... | 2 | 16 | 8.1.1.1346.2 |  |
|                   |        |       |             |                   | 2.00              | 99   | N L L C P S T P F F N T L Y D P Y R | Deamidated(N)@1<br>ICAT-C(C)@4<br>Phe->Leu@9              |               | -0.0405 | 2501.18... | 3 | 17 | 8.1.1.1428.3 |  |
|                   |        |       |             |                   | 2.00              | 99   | V I C D H L G L G V K               | ICAT-C(C)@3                                               |               | -0.0337 | 1379.72... | 2 | 17 | 8.1.1.1295.3 |  |
|                   |        |       |             |                   | 1.30              | 95   | Y I F T I D D D C F V A K           | ICAT-C:13C(9)(C)@9                                        |               | -0.0702 | 1784.80... | 2 | 15 | 9.1.1.1496.3 |  |
|                   |        |       |             |                   | 0.01              | 2    | A S C I S F K                       | ICAT-C:13C(9)(C)@3                                        |               | -0.0221 | 990.5035   | 2 | 9  | 8.1.1.1274.4 |  |
|                   |        |       |             |                   | 0.00              | < 1  | E K L S P I D P Y F D K             |                                                           | missed K-L... | -0.0118 | 1450.72... | 2 | 6  | 3.1.1.1892.2 |  |
|                   |        |       |             |                   | 0.00              | < 1  | E P A N T V G I P V N H I           | Glu->pyro-Glu@N-term<br>Deamidated(N)@4<br>Oxidation(P)@9 | cleaved V-... | -0.0572 | 1358.62... | 2 | 8  | 9.1.1.1353.2 |  |
|                   |        |       |             |                   | 0.00              | < 1  | E P A N T V G I P V N H I P         |                                                           | cleaved V-... | -0.0411 | 1456.72... | 2 | 7  | 5.1.1.1981.4 |  |
|                   |        |       |             |                   | 0.00              | < 1  | E P A N T V G I P V N H I P         |                                                           | cleaved V-... | -0.0947 | 1456.67... | 2 | 6  | 6.1.1.1911.4 |  |
|                   |        |       |             |                   | 0.00              | < 1  | E P A N T V G I P V N H I P         |                                                           | cleaved V-... | -0.1213 | 1456.64... | 2 | 7  | 7.1.1.1808.3 |  |

## Protein Sequence Coverage - reversibly glycosylated polypeptide-1 [Arabidopsis thaliana]

MV**E**PANTVGI**P**VNHI**P**LLKDEL

IPTIRNLDFLEMWRPFLQPYHLIIVQGDPSKTI**A**V**P**E**G**F**D**YEL**Y**NRNDINRIL**G**PK**A**SC**I**S**F**K**D**SACRCFGY**M**VS**K**KK**Y**I**F**T**I**DDDC**F**VAK**D**PSGKAVNALE  
 QHI**K**N**L**L**C**P**S**T**P**F**F**N**T**L**Y**D**P**Y**R**EGAD**F**VR**G**Y**P**FL**R**EG**V**ST**A**V**S**H**L**W**L**N**I**P**D**Y**D**A**P**T**Q**L**V**K**P****K**ER**N**TR**Y**VD**A**VM**T**I**P**K**G**T**L**F**P**M**C**G**M**N**L**A**F**D**R**ELIG**P**AM**Y**F**L**M**G**D**G**Q**P**I**G**R**Y**DDM**W**AG**W**C**I**K**V**I  
 C**D**H**L**G**L**G**V**K**T**G**L**P**Y**I**Y**H**S**K**A**SN**P**F**V**N**L**K**K**E**Y**K**G**I**F**W**Q**E**D**I**P**F**F**Q**S**A**K**L**T**K**E**A**V**T**V**Q**Q**C**Y**M**E**L**S**K**L**V**K****E**K**L**S**P**I**D**P**Y**F**D**K**L**A**D**A**M**V**T**W**I**E**A**W**D**L**N**P**P**T**K**A



# gi|60686421 Oxalic acid oxidase

## Proteins Detected

| N | Unu... | Total | % Cov | Accessio... | Name                                              | Species                          | Peptides(95%) | Biological Processes | Molecular Functions | PANT |
|---|--------|-------|-------|-------------|---------------------------------------------------|----------------------------------|---------------|----------------------|---------------------|------|
| 1 | 45.88  | 45.88 | 90.5  | gi 62131... | myrosinase [Brassica rapa var. parachinensis]     | Brassica rapa var. parachinensis | 68            |                      |                     |      |
| 2 | 27.80  | 27.80 | 67.6  | gi 8745521  | ribulose-1,5-bisphosphate carboxylase/oxygena...  | Brassica napus                   | 31            |                      |                     |      |
| 3 | 10.32  | 10.32 | 86.5  | gi 899226   | malate dehydrogenase [Brassica napus]             | Brassica napus                   | 7             |                      |                     |      |
| 4 | 9.45   | 9.45  | 66.2  | gi 60686... | oxalic acid oxidase [Brassica napus]              | Brassica napus                   | 6             |                      |                     |      |
| 5 | 8.96   | 8.96  | 68.9  | gi 15226... | putative triosephosphate isomerase [Arabidopsi... | Arabidopsis thaliana             | 5             |                      |                     |      |

## Protein Group 4 - oxalic acid oxidase [Brassica napus]

| Proteins in Group |        |       |             |                            |      | Peptides in Group |      |                   |                                |                |         |            |   |    |   |  |
|-------------------|--------|-------|-------------|----------------------------|------|-------------------|------|-------------------|--------------------------------|----------------|---------|------------|---|----|---|--|
| N                 | Unu... | Total | Accession # | Name                       |      | Con...            | Conf | Sequence          | Modifications                  | Cleavages      | ΔMass   | Prec MW    | z | Sc |   |  |
| 4                 | 9.45   | 9.45  | gi 60686421 | oxalic acid oxidase [...]  | Bras | 2.00              | 99   | AETPAGYPCIRPIHVK  | ICAT-C:13C(9)(C)@9             |                | -0.0472 | 1987.02... | 4 | 15 | 3 |  |
|                   | 0.00   | 9.45  | gi 914911   | germin-like protein        |      | 2.00              | 99   | PCIRPIHVK         | ICAT-C:13C(9)(C)@2             | cleaved Y-P... | -0.0204 | 1297.75... | 2 | 14 | 2 |  |
|                   | 0.00   | 9.45  | gi 1169941  | Germin-like protein 1...   | BRA  | 2.00              | 99   | RAETPAGYPCIRPIHVK | ICAT-C:13C(9)(C)@10            | missed R-A...  | -0.0819 | 2143.09... | 3 | 16 | 1 |  |
|                   | 0.00   | 9.45  | gi 15218535 | germin-like protein [Ar... | Arab | 2.00              | 99   | SVQDFCVANLKR      | ICAT-C:13C(9)(C)@6             | cleaved A-S... | -0.0138 | 1614.84... | 3 | 15 | 2 |  |
|                   |        |       |             |                            |      | 1.40              | 96   | SVQDFCVANLK       | ICAT-C:13C(9)(C)@6             | cleaved A-S... | -0.0641 | 1458.69... | 2 | 14 | 1 |  |
|                   |        |       |             |                            |      | 0.05              | 11   | GYPCIRPIHVK       | Oxidation(P)@3<br>No ICAT(C)@4 | cleaved A-G... | 0.0571  | 1297.75... | 2 | 15 | 2 |  |
|                   |        |       |             |                            |      | 0.00              | 96   | AETPAGYPCIRPIHVK  | ICAT-C(C)@9                    |                | -0.0465 | 1977.99... | 4 | 13 | 3 |  |
|                   |        |       |             |                            |      | 0.00              | 95   | AETPAGYPCIRPIHVK  | ICAT-C(C)@9                    |                | -0.0414 | 1978.00... | 3 | 13 | 1 |  |
|                   |        |       |             |                            |      | 0.00              | 78   | AETPAGYPCIRPIHVK  | ICAT-C(C)@9                    |                | -0.0238 | 1978.02... | 4 | 12 | 2 |  |
|                   |        |       |             |                            |      | 0.00              | 99   | AETPAGYPCIRPIHVK  | ICAT-C:13C(9)(C)@9             |                | -0.0456 | 1987.03... | 4 | 14 | 2 |  |
|                   |        |       |             |                            |      | 0.00              | 99   | AETPAGYPCIRPIHVK  | ICAT-C:13C(9)(C)@9             |                | -0.0688 | 1987.00... | 3 | 16 | 1 |  |

## Protein Sequence Coverage - oxalic acid oxidase [Brassica napus]

MLRIIFLLSLLFALSNA**SVQDFCVANLKR**AETPAGYPCIRPIHVKASDFVFSLGTGNTTNIISAAVT**PGFVAQFPALNGLGISTARL**DLAPK**GVI**PMHTHPGASEVLFVLDGSITAGFISSANSVYV**QTLKPGQVMVFPQGLLHFQINAGKTPAAAFVTFSSAS**PLQILDALFANTLSTELVS**ATTF**LPPATVKTLKGLVGGTG

# gi|15233723 Threonine synthase

## Proteins Detected

| N  | Unu... | Total | % Cov | Accessio... | Name                                                | Species              | Peptides(95%) | Biological Processes | Molecular Functions | PANT |
|----|--------|-------|-------|-------------|-----------------------------------------------------|----------------------|---------------|----------------------|---------------------|------|
| 43 | 2.38   | 2.38  | 40.1  | gi 15233... | threonine synthase [Arabidopsis thaliana]           | Arabidopsis thaliana | 2             |                      |                     |      |
| 44 | 2.29   | 2.29  | 49.6  | gi 18266... | chlorophyll a/b binding protein [Brassica oleracea] | Brassica oleracea    | 3             |                      |                     |      |
| 45 | 2.28   | 2.28  | 47.6  | gi 15227... | phosphoenolpyruvate carboxylase [Arabidopsis t...   | Arabidopsis thaliana | 1             |                      |                     |      |
| 46 | 2.27   | 2.27  | 33.9  | gi 15222... | elongation factor, putative [Arabidopsis thaliana]  | Arabidopsis thaliana | 1             |                      |                     |      |
| 47 | 2.25   | 2.25  | 45.4  | gi 15223... | phosphoglycerate kinase, putative [Arabidopsis t... | Arabidopsis thaliana | 1             |                      |                     |      |

## Protein Group 43 - threonine synthase [Arabidopsis thaliana]

| Proteins in Group |        |       |             |                          |      | Peptides in Group |      |                   |                                                       |                |         |            |   |    |   |  |
|-------------------|--------|-------|-------------|--------------------------|------|-------------------|------|-------------------|-------------------------------------------------------|----------------|---------|------------|---|----|---|--|
| N                 | Unu... | Total | Accession # | Name                     |      | Con...            | Conf | Sequence          | Modifications                                         | Cleavages      | ΔMass   | Prec MW    | z | Sc |   |  |
| 43                | 2.38   | 2.38  | gi 15233723 | threonine synthase [...] | Arab | 2.00              | 99   | HCGISHTGSFK       | ICAT-C:13C(9)(C)@2                                    |                | -0.0203 | 1408.67... | 2 | 18 | 9 |  |
|                   | 0.00   | 2.20  | gi 15218600 | threonine synthase, p... | Arab | 0.20              | 38   | VKHCGISHTGSFK     | No ICAT(C)@4                                          | cleaved W-...  | -0.0390 | 1399.66... | 2 | 14 | 9 |  |
|                   |        |       |             |                          |      | 0.14              | 27   | NRSNAVNPFSAK      | Deamidated(N)@1                                       | missed R-S...  | 0.0912  | 1304.73... | 3 | 11 | 7 |  |
|                   |        |       |             |                          |      | 0.02              | 5    | ADFGAVMDVLK       | Oxidation(D)@8                                        |                | -0.0736 | 1180.50... | 2 | 10 | 8 |  |
|                   |        |       |             |                          |      | 0.02              | 4    | KLRNQGVIAPTDR     | Oxidation(R)@3<br>Oxidation(N)@4                      | cleaved F-...  | -0.0627 | 1498.75... | 2 | 12 | 8 |  |
|                   |        |       |             |                          |      | 0.00              | < 1  | TGVALTALFK        | Thr->Pro@1                                            | cleaved H-...  | -0.0173 | 1015.58... | 2 | 11 | 7 |  |
|                   |        |       |             |                          |      | 0.00              | < 1  | DEARRNR           | Deamidated(R)@5                                       | missed R-R...  | 0.0483  | 916.4958   | 2 | 5  | 1 |  |
|                   |        |       |             |                          |      | 0.00              | < 1  | DEARRNR           | Deamidated(R)@5<br>Deamidated(N)@6<br>Deamidated(R)@7 | missed R-R...  | 0.0595  | 918.4751   | 2 | 6  | 7 |  |
|                   |        |       |             |                          |      | 0.00              | < 1  | DFKPMTASTTFASAIQI |                                                       | cleaved I-G... | -0.0244 | 1827.88... | 2 | 9  | 7 |  |
|                   |        |       |             |                          |      | 0.00              | < 1  | DLGMTVLVSOVNLRLK  | Oxidation(D)@1                                        | missed R-L...  | -0.1048 | 1861.88... | 3 | 9  | 2 |  |

## Protein Sequence Coverage - threonine synthase [Arabidopsis thaliana]

MASSCLFNASVSSLNPKQDPIRRHRSTSLLRHRPVVISCTADGNNIKAPIETAVKPPHRTEDNIR**DEARRNR**SNAVN**PFSAK**YVYVFNAAAGSTESYSLDEIVYRSRSGLLDVEHDMALKRFDGAYW  
 RDLFDSRVGKSTWPGSGVWSKK**EWVLP**EIDDDIVSAFEGNSNLFWAERFGKQFLGMNDLVVY**HCGISHTGSFK**DLGMTVLVSVQV**NRLRKM**KRPVVGVCASGTGDTSAALSAYCASAGIPISIVFLPA  
 NK**ISMAQLVQPIANGAF**VLSIDTDFDGMCKL**IREITAELPIY**LANSLSLRLEGQK**TAAIEILQQF**DWQVPDWVIVPGGNL**GNIYAF**YKGFKMCQELGLVDRIPRMVCAQANANPLYLHYKSGW**KDF**  
**KPMTASTTFASAIQI**GDPVSIDRAVYALKKCNIGVEEATEEELMDAMAQADSTGMFIC**PHTGVALTALFKLRNQGVIAPTDR**TVVVSTAHLKFTQSKIDYHSNAIPDMACRF**SNPPVDVKADFGAVM**  
**DVLKSYLGSNTILTS**

# gi|15222741 Initiation factor 5A-4, putative

## Proteins Detected

| N  | Unu... | Total | % Cov | Accessio... | Name                                                    | Species              | Peptides(95%) | Biological Processes | Molecular Functions | PANT |
|----|--------|-------|-------|-------------|---------------------------------------------------------|----------------------|---------------|----------------------|---------------------|------|
| 75 | 2.01   | 2.01  | 39.0  | gi 15222741 | initiation factor 5A-4, putative [Arabidopsis thaliana] | Arabidopsis thaliana | 2             |                      |                     |      |

## Protein Group 75 - initiation factor 5A-4, putative [Arabidopsis thaliana]

| Proteins in Group |        |       |              |                             |   | Peptides in Group |      |                     |                                     |                |         |            |   |    |   |
|-------------------|--------|-------|--------------|-----------------------------|---|-------------------|------|---------------------|-------------------------------------|----------------|---------|------------|---|----|---|
| N                 | Unu... | Total | Accession #  | Name                        |   | Con...            | Conf | Sequence            | Modifications                       | Cleavages      | ΔMass   | Prec MW    | z | Sc |   |
| 75                | 2.01   | 2.01  | gi 15222741  | initiation factor 5A-4,...  | A | 2.00              | 99   | KLEDIVPSSHNCVPHVNR  | ICAT-C:13C(9)(C)@12                 | missed K-L...  | -0.0069 | 2394.20... | 3 | 20 | 1 |
|                   | 0.00   | 2.01  | gi 145324016 | eukaryotic translation i... | A | 0.00              | 1    | EASESGASKTYPQSAGNIR | Oxidation(Y)@11<br>Deamidated(N)@17 | cleaved F-E... | 0.0705  | 1969.95... | 3 | 11 | 8 |

## Protein Sequence Coverage - initiation factor 5A-4, putative [Arabidopsis thaliana]

MSDDEHHFEASESGASKTYPQSAGNIRKGGHIVIKNRPKVVEVSTSKTGKHGKCHFAVDIIFTAKKLEDIVPSSHNCVPHVNRVDYQLIDITEDGFVSLTDSGGTKDDLKLPDGLTAQMRIGFDEGKDIVVSVSMSSMGEEQICAVKEVGGGK

## Fragmentation Evidence

KLEDIVPSSHNC[C9]VPHVNR

| Residue | b         | b+2       | y         | y+2       |
|---------|-----------|-----------|-----------|-----------|
| K       | 129.1022  | 65.0548   | 2395.2234 | 1198.1153 |
| L       | 242.1863  | 121.5968  | 2267.1284 | 1134.0679 |
| E       | 371.2289  | 186.1181  | 2154.0444 | 1077.5258 |
| D       | 486.2558  | 243.6316  | 2025.0018 | 1013.0045 |
| I       | 599.3399  | 300.1736  | 1909.9748 | 955.4911  |
| V       | 698.4083  | 349.7078  | 1796.8908 | 898.9490  |
| P       | 795.4611  | 398.2342  | 1697.8224 | 849.4148  |
| S       | 882.4931  | 441.7502  | 1600.7696 | 800.8884  |
| S       | 969.5251  | 485.2662  | 1513.7376 | 757.3724  |
| H       | 1106.5841 | 553.7957  | 1426.7055 | 713.8564  |
| N       | 1220.6270 | 610.8171  | 1289.6466 | 645.3269  |
| C[C9]   | 1559.7933 | 780.4003  | 1175.6037 | 588.3055  |
| D       | 1674.8203 | 837.9138  | 836.4373  | 418.7223  |
| V       | 1773.8887 | 887.4480  | 721.4104  | 361.2088  |
| P       | 1870.9415 | 935.9744  | 622.3420  | 311.6746  |
| H       | 2008.0004 | 1004.5038 | 525.2892  | 263.1482  |
| V       | 2107.0688 | 1054.0380 | 388.2303  | 194.6188  |
| N       | 2221.1117 | 1111.0595 | 289.1619  | 145.0846  |
| R       | 2377.2128 | 1189.1101 | 175.1190  | 88.0631   |

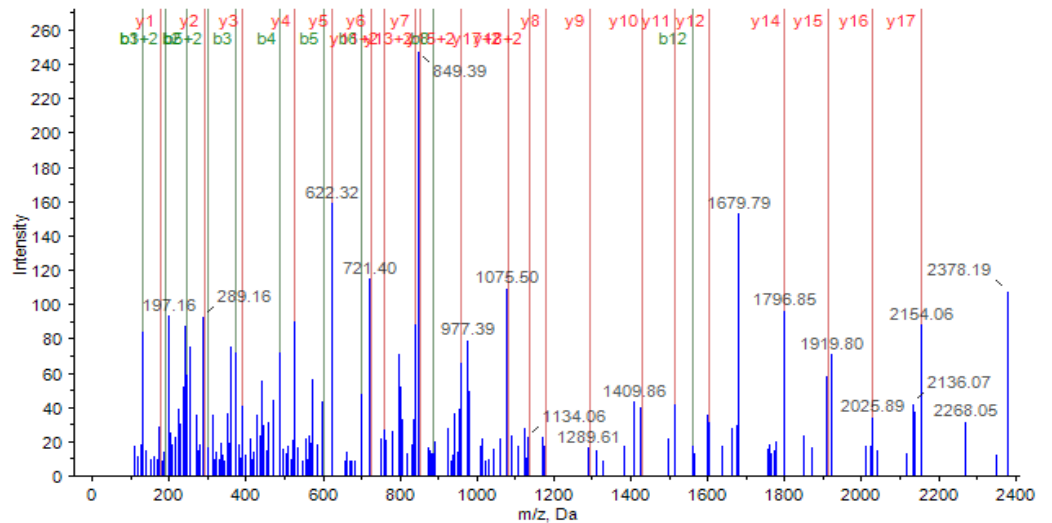

# gi|15236220 Mitochondrial elongation factor Tu

## Proteins Detected

| N  | Unu... | Total | % Cov | Accessio... | Name                                                 | Species              | Peptides(95%) | Biological Processes | Molecular Functions | PANT |
|----|--------|-------|-------|-------------|------------------------------------------------------|----------------------|---------------|----------------------|---------------------|------|
| 23 | 4.07   | 4.07  | 68.1  | gi 15219... | putative malate dehydrogenase[Arabidopsis tha...     | Arabidopsis thaliana | 3             |                      |                     |      |
| 24 | 4.06   | 4.06  | 56.8  | gi 15236... | mitochondrial elongation factor Tu [Arabidopsis t... | Arabidopsis thaliana | 4             |                      |                     |      |
| 25 | 4.03   | 4.03  | 44.9  | gi 15241... | tubulin alpha-5 chain [Arabidopsis thaliana]         | Arabidopsis thaliana | 2             |                      |                     |      |
| 26 | 4.02   | 4.02  | 32.8  | gi 15241... | formate dehydrogenase (FDH)[Arabidopsis thali...     | Arabidopsis thaliana | 7             |                      |                     |      |
| 27 | 3.90   | 3.90  | 57.0  | gi 15237... | H+-transporting ATPase chain E, vacuolar [Arab...    | Arabidopsis thaliana | 3             |                      |                     |      |
| 28 | 3.60   | 3.60  | 44.5  | gi 15220... | putative alanine aminotransferase [Arabi...          | Arabidopsis thaliana | 2             |                      |                     |      |

## Protein Group 24 - mitochondrial elongation factor Tu [Arabidopsis thaliana]

| Proteins in Group |        |       |             |                          |      | Peptides in Group |      |                  |                                     |               |         |            |   |    |   |
|-------------------|--------|-------|-------------|--------------------------|------|-------------------|------|------------------|-------------------------------------|---------------|---------|------------|---|----|---|
| N                 | Unu... | Total | Accession # | Name                     |      | Con...            | Conf | Sequence         | Modifications                       | Cleavages     | ΔMass   | Prec MW    | z | Sc |   |
| 24                | 4.06   | 4.06  | gi 15236220 | mitochondrial elong...   | Arab | 2.00              | 99   | HS PFFAGYR P QFY |                                     | cleaved Y-... | -0.0365 | 1615.72... | 2 | 17 | 7 |
| 76                | 2.00   | 4.00  | gi 15237059 | translation elongatio... | Arab | 2.00              | 99   | HYAHVDCPGHADYVK  | ICAT-C:13C(9)(C)@7                  |               | -0.0307 | 1946.88... | 4 | 15 | 2 |
|                   |        |       |             |                          |      | 2.00              | 99   | QVGVPSLVCFLNK    | Gln->pyro-Glu@N-term<br>ICAT-C(C)@9 |               | -0.0620 | 1612.80... | 2 | 14 | 8 |
|                   |        |       |             |                          |      | 0.05              | 11   | AEEGKAKAIAFDEIDK | Glu->Asn@3<br>Oxidation(D)@12       | cleaved L-... | -0.0261 | 1734.85... | 3 | 13 | 1 |

## Protein Sequence Coverage - mitochondrial elongation factor Tu [Arabidopsis thaliana]

MASVVLRNPPSSKRLVPFSSQIYSRCGASVITSSYSISHSIGGDDLSSSTFGTSSFWRSMATFTRNKPHVNVGTIGHVDHGKTTLTAAITKVLAEEGKAKAIAFDEIDKAPEEKKRGITIIATAHVEYETA  
KRHYAHVDCPGHADYVKNMITGAAQMDGGILVVS GPDGMPQTKEHILLARQVGVPSLVCFLNKVDVVDDPELLELVEMELRELLSFYKFGDDIPIIRGSALSALQGTNDEIGRQAILKLMDAVDEY  
IPDPVVRVLDKPFMPIDVFSIQGRGTVAIGRIEQGVIKVGEVEEILGLREGGVPLKSTVTGVEMFKKILDNGQAGDNVGLLLRGLKREDIQRGMVIAKPGSCKTYKKFEAEIYVLTKDEGGRHTAFF  
SNYRPFYLR TADITGKVELPENVKMVMVPGDNVTAVFELIMPVPLETQRFALREGGRIVGAGVVS KVM T

# gi|15227954 60S ribosomal protein L2

## Proteins Detected

| N  | Unu... | Total | % Cov | Accessio... | Name                                            | Species              | Peptides(95%) | Biological Processes | Molecular Functions | PANT |
|----|--------|-------|-------|-------------|-------------------------------------------------|----------------------|---------------|----------------------|---------------------|------|
| 80 | 2.00   | 2.00  | 78.3  | gi 15227... | 60S ribosomal protein L2 [Arabidopsis thaliana] | Arabidopsis thaliana | 2             |                      |                     |      |

## Protein Group 80 - 60S ribosomal protein L2 [Arabidopsis thaliana]

| Proteins in Group |        |       |             |                            | Peptides in Group |      |                    |                 |               |         |            |   |    |  |
|-------------------|--------|-------|-------------|----------------------------|-------------------|------|--------------------|-----------------|---------------|---------|------------|---|----|--|
| N                 | Unu... | Total | Accession # | Name                       | Con...            | Conf | Sequence           | Modifications   | Cleavages     | ΔMass   | Prec MW    | z | Sc |  |
| 80                | 2.00   | 2.00  | gi 15227954 | 60S ribosomal protei...    | 2.00              | 99   | SIPEGAVVCNVEHHVGDR | ICAT-C(C)@9     |               | -0.0704 | 2143.97... | 4 | 16 |  |
|                   | 0.00   | 2.00  | gi 37731421 | ribosomal protein L2 [...] | 0.00              | 1    | GAPLARVTFRHPFR     | Deamidated(R)@6 | missed R-V... | -0.1644 | 1657.70... | 2 | 10 |  |

## Protein Sequence Coverage - 60S ribosomal protein L2 [Arabidopsis thaliana]

MGRVIRAQRK**GAGSVFKSHTHHRKGP**AKFRSLDFGERNGYLKGVVTEI IHDPPGR**GAPLARVTFRHPFR**FKKQ**ELFVA**AEGM**YTGQFLYCGK**KATLVVGNVPLR**SIP**EGAVVCNVEHHVGDR**GVLAR**ASGDYAI**VIAHN**PDSD**TRIKL**PSGSKK**IVPSG**CRAMIG**QVAGG**GRTEK**PMLKAG**NAYHKYR**VKRNSWPK**VRGVAMNPVEHPHGGGN**HQHIG**HASTVRRDAP**PGQK**VGLIAARR**TGRLR**GQAASAAKAD

## Fragmentation Evidence

SIPEGAVVC[CO]NVEHHVGDR

| Residue | b         | b+2       | y         | y+2       |
|---------|-----------|-----------|-----------|-----------|
| S       | 88.0393   | 44.5233   | 2145.0506 | 1073.0289 |
| I       | 201.1234  | 101.0653  | 2058.0185 | 1029.5129 |
| P       | 298.1761  | 149.5917  | 1944.9345 | 972.9709  |
| E       | 427.2187  | 214.1130  | 1847.8817 | 924.4445  |
| G       | 484.2402  | 242.6237  | 1718.8391 | 859.9232  |
| A       | 555.2773  | 278.1423  | 1661.8176 | 831.4125  |
| V       | 654.3457  | 327.6765  | 1590.7805 | 795.8939  |
| V       | 753.4141  | 377.2107  | 1491.7121 | 746.3597  |
| C[CO]   | 1083.5503 | 542.2788  | 1392.6437 | 696.8255  |
| N       | 1197.5932 | 599.3003  | 1062.5075 | 531.7574  |
| V       | 1296.6616 | 648.8345  | 948.4646  | 474.7359  |
| E       | 1425.7042 | 713.3558  | 849.3962  | 425.2017  |
| H       | 1562.7632 | 781.8852  | 720.3536  | 360.6804  |
| H       | 1699.8221 | 850.4147  | 583.2947  | 292.1510  |
| V       | 1798.8905 | 899.9489  | 446.2358  | 223.6215  |
| G       | 1855.9119 | 928.4596  | 347.1674  | 174.0873  |
| D       | 1970.9389 | 985.9731  | 290.1459  | 145.5766  |
| R       | 2127.0400 | 1064.0236 | 175.1190  | 88.0631   |

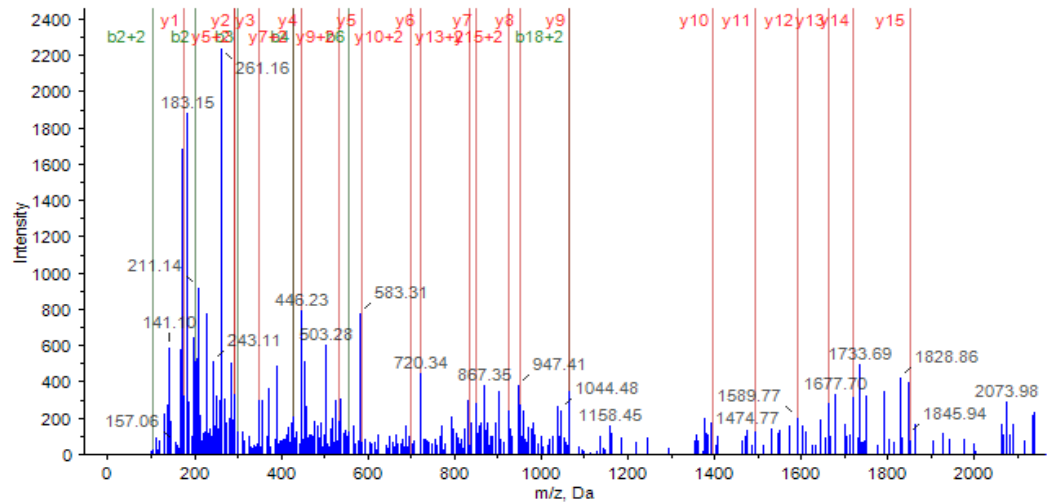

# gi|15228674 Peptidylprolyl isomerase ROC4

## Proteins Detected

| N  | Unu... | Total | % Cov | Accessio... | Name                                                  | Species              | Peptides(95%) | Biological Processes | Molecular Functions | PANT |
|----|--------|-------|-------|-------------|-------------------------------------------------------|----------------------|---------------|----------------------|---------------------|------|
| 49 | 2.19   | 2.19  | 30.6  | gi 15227... | enolase (2-phospho-D-glycerate hydroylase) [Ar...     | Arabidopsis thaliana | 1             |                      |                     |      |
| 50 | 2.17   | 2.17  | 28.0  | gi 18141... | senescence-associated cysteine protease [Bras...      | Brassica oleracea    | 2             |                      |                     |      |
| 51 | 2.16   | 2.16  | 62.7  | gi 15228... | peptidylprolyl isomerase ROC4 [Arabidopsis thal...    | Arabidopsis thaliana | 3             |                      |                     |      |
| 52 | 2.15   | 2.15  | 44.4  | gi 15219... | hypothetical protein [Arabidopsis thaliana]           | Arabidopsis thaliana | 2             |                      |                     |      |
| 53 | 2.14   | 2.14  | 36.0  | gi 31321... | putative papillar cell-specific calnexin [Brassica... | Brassica napus       | 1             |                      |                     |      |

## Protein Group 51 - peptidylprolyl isomerase ROC4 [Arabidopsis thaliana]

| Proteins in Group |        |       |             |                         |      | Peptides in Group |      |                         |                                                  |                |         |            |   |    |  |  |
|-------------------|--------|-------|-------------|-------------------------|------|-------------------|------|-------------------------|--------------------------------------------------|----------------|---------|------------|---|----|--|--|
| N                 | Unu... | Total | Accession # | Name                    | Arab | Con...            | Conf | Sequence                | Modifications                                    | Cleavages      | ΔMass   | Prec MW    | z | Sc |  |  |
| 51                | 2.16   | 2.16  | gi 15228674 | peptidylprolyl isome... | Arab | 2.00              | 99   | HTGPGI LSMANAGPNTNGS... | Oxidation(M)@9<br>ICAT-C:13C(9)(C)@24            |                | -0.0962 | 3013.38... | 3 | 26 |  |  |
|                   |        |       |             |                         |      | 0.11              | 23   | SMAAEEEEVIEPQAKV/TNK    | Oxidation(M)@2<br>Glu->Ser@8<br>Deamidated(Q)@13 | missed K-V...  | -0.0522 | 2076.93... | 3 | 13 |  |  |
|                   |        |       |             |                         |      | 0.05              | 10   | SMAAEEEEVIE             | Phospho(S)@1                                     | cleaved E-...  | 0.1681  | 1315.65... | 2 | 12 |  |  |
|                   |        |       |             |                         |      | 0.00              | < 1  | FICTVK                  | ICAT-C:13C(9)(C)@3                               | cleaved F-F... | -0.0322 | 945.5083   | 2 | 9  |  |  |
|                   |        |       |             |                         |      | 0.00              | < 1  | FICTVK                  | ICAT-C(9)(C)@3                                   | cleaved F-F... | 0.0298  | 936.4805   | 2 | 7  |  |  |

## Protein Sequence Coverage - peptidylprolyl isomerase ROC4 [Arabidopsis thaliana]

MASSSSMQMVHTSRISIAQIGFGVKSQLVSNRTTQSVCFGARSSGIALSSRLHYASPIKQFSGVYATTKHQRTACVKSMMAAEEEEVIEPQAKV/TNKVYFDVEIGGEVAGRIVMGLFGEVVPKIVENFR  
ALCTGEKKYGYKGSFFHRIIKDFMIQGGDFTEGNGTGGISIIYAKFEDENFTLKHGTGPGILSMANAGPNTNGSQFFICTVKTSWLDNKHVVFQVIEGKMLVRTLESQETRAFDVPPKKGCRITYACGEL  
PLDA

# gi|15228715 Ubiquitin extension protein (UBQ5)

## Proteins Detected

| N  | Unu... | Total | % Cov | Accessio... | Name                                               | Species              | Peptides(95%) | Biological Processes | Molecular Functions | PANT |
|----|--------|-------|-------|-------------|----------------------------------------------------|----------------------|---------------|----------------------|---------------------|------|
| 99 | 1.52   | 1.52  | 52.9  | gi 15228... | ubiquitin extension protein (UBQ5) [Arabidopsis... | Arabidopsis thaliana | 1             |                      |                     |      |

## Protein Group 99 - ubiquitin extension protein (UBQ5) [Arabidopsis thaliana]

| Proteins in Group |        |       |             |                            | Peptides in Group |      |                 |                    |               |         |            |   |      |  |  |
|-------------------|--------|-------|-------------|----------------------------|-------------------|------|-----------------|--------------------|---------------|---------|------------|---|------|--|--|
| N                 | Unu... | Total | Accession # | Name                       | Con...            | Conf | Sequence        | Modifications      | Cleavages     | ΔMass   | Prec MW    | z | Sc   |  |  |
| 99                | 1.52   | 1.52  | gi 15228715 | ubiquitin extension p...   | 1.52              | 97   | CGLTYVYQK       | ICAT-C:13C(9)(C)@1 |               | -0.0461 | 1309.63... | 2 | 13 8 |  |  |
|                   | 0.00   | 1.52  | gi 15226498 | putative ubiquitin exte... | 0.00              | < 1  | EGIPDQQRLLIFAGK |                    | missed R-L... | -0.1295 | 1667.77... | 3 | 8 9  |  |  |

## Protein Sequence Coverage - ubiquitin extension protein (UBQ5) [Arabidopsis thaliana]

MQIFVKTLTGKTTITLEVSSDTIDNVKAKIQDKEGIPDQQRLLIFAGKQLEDGRTLADYNIQKESTLHLVLRRLGGAKRRKKKTYTKPKKIHKHKHKVVKLAVLQFYKIDGSGKVRQLRKECPNATCGA  
 GTFMASHFDRHYCGK**CGLTYVYQK**EGVEA

## Fragmentation Evidence

[C[9]]GLTYVYQK

| Residue | b         | b+2      | y         | y+2      |
|---------|-----------|----------|-----------|----------|
| C[C9]   | 340.1736  | 170.5905 | 1310.6860 | 655.8467 |
| G       | 397.1951  | 199.1012 | 971.5197  | 486.2635 |
| L       | 510.2792  | 255.6432 | 914.4982  | 457.7527 |
| T       | 611.3269  | 306.1671 | 801.4141  | 401.2107 |
| Y       | 774.3902  | 387.6987 | 700.3665  | 350.6869 |
| V       | 873.4586  | 437.2329 | 537.3031  | 269.1552 |
| Y       | 1036.5219 | 518.7646 | 438.2347  | 219.6210 |
| Q       | 1164.5805 | 582.7939 | 275.1714  | 138.0893 |
| K       | 1292.6755 | 646.8414 | 147.1128  | 74.0600  |

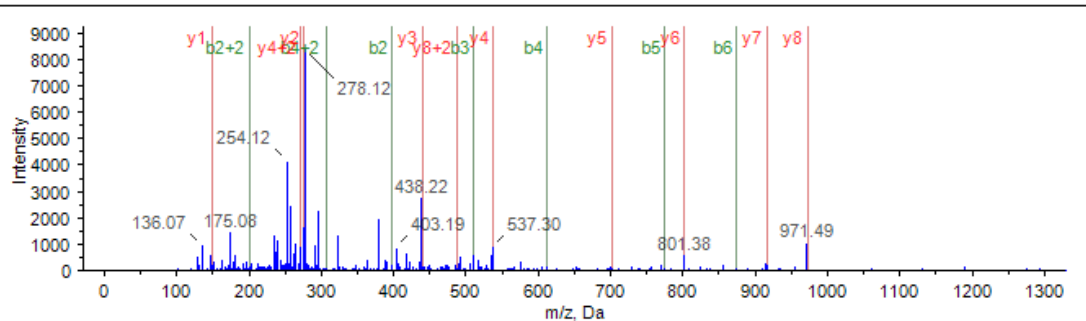

# gi|157849770 Early response to dehydration protein (ERD12)

## Proteins Detected

| N  | Unu... | Total | % Cov | Accessio... | Name                                                          | Species              | Peptides(95%) | Biological Processes | Molecular Functions | PANT |
|----|--------|-------|-------|-------------|---------------------------------------------------------------|----------------------|---------------|----------------------|---------------------|------|
| 68 | 2.02   | 2.02  | 70.9  | gi 15236... | putative protein [Arabidopsis thaliana]                       | Arabidopsis thaliana | 4             |                      |                     |      |
| 69 | 2.02   | 2.02  | 37.9  | gi 15784... | ERD12 protein [Brassica rapa]                                 | Brassica rapa        | 2             |                      |                     |      |
| 70 | 2.02   | 2.02  | 65.4  | gi 83032... | unknown [Brassica rapa]                                       | Brassica rapa        | 0             |                      |                     |      |
| 71 | 2.02   | 2.02  | 47.2  | gi 6683965  | cinnamyl alcohol dehydrogenase [Brassica rapa]                | Brassica rapa        | 1             |                      |                     |      |
| 72 | 2.01   | 2.01  | 63.4  | gi 15233... | probable H <sup>+</sup> -transporting ATPase[Arabidopsis t... | Arabidopsis thaliana | 4             |                      |                     |      |

## Protein Group 69 - ERD12 protein [Brassica rapa]

| Proteins in Group |        |       |              |                        |               | Peptides in Group |      |                   |                                                      |               |         |            |
|-------------------|--------|-------|--------------|------------------------|---------------|-------------------|------|-------------------|------------------------------------------------------|---------------|---------|------------|
| N                 | Unu... | Total | Accession #  | Name                   | Species       | Con...            | Conf | Sequence          | Modifications                                        | Cleavages     | ΔMass   | Prec MW    |
| 69                | 2.02   | 2.02  | gi 157849770 | ERD12 protein [Bras... | Brassica rapa | 2.00              | 99   | NPQQLCIGDLVPFTNK  | ICAT-C:13C(9)(C)@6                                   |               | -0.0663 | 2021.99... |
|                   |        |       |              |                        |               | 0.01              | 3    | LFYTFY LK         |                                                      |               | -0.0139 | 1093.57... |
|                   |        |       |              |                        |               | 0.01              | 2    | NLRISSNGPALSARSR  | Deamidated(R)@3<br>Deamidated(N)@7                   | cleaved H-... | -0.0595 | 1699.83... |
|                   |        |       |              |                        |               | 0.00              | < 1  | NEGDRHSPAVLK      | Deamidated(N)@1<br>Deamidated(R)@5<br>Oxidation(H)@6 | cleaved F-... | 0.0131  | 1339.64... |
|                   |        |       |              |                        |               | 0.00              | < 1  | AITGGSGVFEGAYGQVK | Deamidated(Q)@15                                     | cleaved L-... | -0.0338 | 1640.77... |
|                   |        |       |              |                        |               | 0.00              | < 1  | EDTL LAITGGSGVF   | Glu->pyro-Glu@N-term<br>Oxidation(D)@2               | cleaved Y-... | -0.0559 | 1376.62... |
|                   |        |       |              |                        |               | 0.00              | < 1  | EDTL LAITGGSGVF   | Glu->pyro-Glu@N-term                                 | cleaved Y-... | -0.0310 | 1360.65... |

## Protein Sequence Coverage - ERD12 protein [Brassica rapa]

```
MIMASSAAAAASISLVRNLSRRHQTPLLGYSSSFHNLRISSNGPALSARSRSSTSTPGFFRITMCNSSSENSRPTKIQLNVYEFNEGDRHSPAVLKLGKNPQQLCIGDLVPFTNKLYTGDLKRRVGIT
AGLCVLIQHVPEKKGERFEASYSFYFGEYGHISVQGPYLTYEDTL LAITGGSGVFEGAYGQVKLRQLVYPTKLFYTFY LKGVVSDLPVELTGKHVEPSKDVKPAAEELSCSARGHYHKLYRIIIIVSLR
FLFSFSDL
```



# gi|414103 Myrosinase, thioglucoside glucohydrolase

## Proteins Detected

| N | Unu... | Total | % Cov | Accessio... | Name                                               | Species              | Peptides(95%) | Biological Processes | Molecular Functions | PANTHER ID |
|---|--------|-------|-------|-------------|----------------------------------------------------|----------------------|---------------|----------------------|---------------------|------------|
| 1 | 48.95  | 48.95 | 89.5  | gi 414103   | myrosinase, thioglucoside glucohydrolase[Brassi... | Brassica napus       | 37            |                      |                     |            |
| 2 | 27.81  | 27.81 | 84.3  | gi 8745521  | ribulose-1,5-bisphosphate carboxylase/oxygenas...  | Brassica napus       | 21            |                      |                     |            |
| 3 | 11.79  | 11.79 | 88.3  | gi 11972... | ribulose bisphosphate carboxylase [Brassica rapa]  | Brassica rapa        | 11            |                      |                     |            |
| 4 | 10.55  | 10.55 | 56.0  | gi 558479   | tonoplast ATPase 70 kDa subunit                    |                      | 5             |                      |                     |            |
| 5 | 10.27  | 10.27 | 54.6  | gi 15226... | putative triosephosphate isomerase[Arabidopsis...  | Arabidopsis thaliana | 7             |                      |                     |            |
| 6 | 10.21  | 10.21 | 64.2  | gi 15229... | glyceraldehyde-3-phosphate dehydrogenase Cs...     | Arabidopsis thaliana | 6             |                      |                     |            |

## Protein Group 1 - myrosinase, thioglucoside glucohydrolase [Brassica napus]

| Proteins in Group |        |       |              |            | Peptides in Group |      |                       |                                                          |                |        |            |   |    |              |
|-------------------|--------|-------|--------------|------------|-------------------|------|-----------------------|----------------------------------------------------------|----------------|--------|------------|---|----|--------------|
| N                 | Unu... | Total | Accession #  | Name       | Con...            | Conf | Sequence              | Modifications                                            | Cleavages      | ΔMass  | Prec MW    | z | Sc | Spectrum     |
| 1                 | 48.95  | 48.95 | gi 414103    | myrosinase | 2.00              | 99   | ADEEITCEENNPFCSNTD... | Asp->Ser@2<br>ICAT-C(C)@7<br>Asn->Ser@11<br>ICAT-C(C)@15 |                | 0.3320 | 3058.70... | 3 | 17 | 1.1.1.1832.2 |
| 17                | 5.68   | 47.03 | gi 22595     | myrosinase |                   |      |                       |                                                          |                |        |            |   |    |              |
| 83                | 2.00   | 20.82 | gi 12621052  | myrosinase |                   |      |                       |                                                          |                |        |            |   |    |              |
| 84                | 2.00   | 12.48 | gi 159120044 | myrosinase | 2.00              | 99   | DEEITCEENNPFCSNTDI... | ICAT-C(C)@6<br>ICAT-C(C)@14                              | cleaved A-D... | 0.2950 | 3042.63... | 3 | 15 | 2.1.1.1768.2 |
| 104               | 1.64   | 19.61 | gi 4033345   | myrosinase | 2.00              | 99   | DYADLCFKEFGGK         | ICAT-C(C)@6                                              |                | 0.2197 | 1719.01... | 2 | 15 | 6.1.1.1728.3 |
| 105               | 1.59   | 32.24 | gi 152207441 | myrosinase | 2.00              | 99   | EEITCEENNPFCSNTDIL... | ICAT-C(C)@5<br>Asn->Ser@9<br>ICAT-C(C)@13                | cleaved D-E... | 0.3060 | 2900.61... | 3 | 19 | 1.1.1.1805.2 |
|                   |        |       |              |            | 2.00              | 99   | ESDPASIEAAER          |                                                          | cleaved D-E... | 0.1546 | 1273.73... | 2 | 15 | 2.1.1.1660.2 |
|                   |        |       |              |            | 2.00              | 99   | FGLSYVNWEDLDDR        |                                                          |                | 0.1653 | 1727.94... | 2 | 15 | 6.1.1.1796.4 |
|                   |        |       |              |            | 2.00              | 99   | IDYLCSHLCFLR          | ICAT-C(C)@5<br>ICAT-C(C)@9                               |                | 0.1662 | 1936.13... | 3 | 15 | 6.1.1.1739.2 |
|                   |        |       |              |            | 2.00              | 99   | ITINQLYTVPTR          |                                                          | cleaved W-L... | 0.1381 | 1417.93... | 2 | 15 | 7.1.1.1674.2 |
|                   |        |       |              |            | 2.00              | 99   | MNQFFHGWYMEPLTK       | Oxidation(M)@1<br>Oxidation(W)@8<br>Met->Phe@10          |                | 0.1967 | 1976.08... | 2 | 22 | 7.1.1.1657.2 |
|                   |        |       |              |            | 2.00              | 99   | QIIQDFKDYADLCFK       | Gln->pyro-Glu@N-term                                     |                | 0.1445 | 2065.17... | 2 | 23 | 6.1.1.1825.2 |

## Protein Sequence Coverage - myrosinase, thioglucoside glucohydrolase [Brassica napus]

MKLLHGLALVFLAAASCKADEEITCEENNPFCSNTDILSSKRFKDFLFGVASSAYQACRGVNVWDGFSHRYPEKSGSDLKNGDITTCESYTRWQKDVDVMGELNATGYRFSFAWSRIIPKGVSRG  
 VNQGGLDYHKLIDALLEKNITPFVTLPHWDLQPQLQDEYEGFLDRQIIQDFKDYADLCFKEFGGKVKHWITINQLYTVPTRGYAVGTDAPGRCSFPMVDTKHRCYGGNSSPEPYIVAHNQLLAHATVV  
 DLYRTKYKFKQKGIKIPVMTIRWFLPFDES DPASIEAAERMNQFFHGWYMEPLTKGRYPDIRQIVGSRLLPNFTEEEAEVLAGSYDFLGLNYVVTQYAPKPNPYPSEHTAMMDAGVKLTYDNRSGEF  
 LGPLFVEDEVNGNSYYYPKGIYVMDYFKTKYGDPLIYVTENGSTPSSENREQAIADYKRIDYLCSHLCFLRKVIKEKGVNVRGYFAWALGDNYEFCKGFTVRFGLSYVNWEDLDDRNLEKESGWYQ  
 RFINGTVKNSAKQDFLRSSLSQSQKKKLADA

# gi|46093471 Stromal ascorbate peroxidase

## Proteins Detected

| N  | Unu... | Total | % Cov | Accessio... | Name                                                | Species              | Peptides(95%) | Biological Processes | Molecular Functions | PANT |
|----|--------|-------|-------|-------------|-----------------------------------------------------|----------------------|---------------|----------------------|---------------------|------|
| 32 | 2.89   | 2.89  | 55.1  | gi 15219... | phosphoglycerate kinase, putative [Arabidopsis t... | Arabidopsis thaliana | 2             |                      |                     |      |
| 33 | 2.86   | 2.86  | 36.5  | gi 15229... | S-adenosyl-L-homocysteinase, putative [Arabidop...  | Arabidopsis thaliana | 2             |                      |                     |      |
| 34 | 2.81   | 2.81  | 51.0  | gi 15237... | 3-oxoacyl-(acyl-carrier-protein) synthase I preu... | Arabidopsis thaliana | 1             |                      |                     |      |
| 35 | 2.80   | 2.80  | 78.9  | gi 46093... | stromal ascorbate peroxidase [Brassica oleracea]    | Brassica oleracea    | 1             |                      |                     |      |
| 36 | 2.57   | 2.57  | 47.9  | gi 15240... | NADH dehydrogenase (ubiquinone) (EC 1.6.5.3)...     | Arabidopsis thaliana | 1             |                      |                     |      |

## Protein Group 35 - stromal ascorbate peroxidase [Brassica oleracea]

| Proteins in Group |        |       |             |                         |               | Peptides in Group |      |                          |                    |                |         |            |
|-------------------|--------|-------|-------------|-------------------------|---------------|-------------------|------|--------------------------|--------------------|----------------|---------|------------|
| N                 | Unu... | Total | Accession # | Name                    | Species       | Con...            | Conf | Sequence                 | Modifications      | Cleavages      | ΔMass   | Prec MW    |
| 35                | 2.80   | 2.80  | gi 46093471 | stromal ascorbate pe... | Brassica oler | 2.00              | 99   | VDTSGPHECPEEGRLPDAG...   | ICAT-C:13C(9)(C)@9 | missed R-L...  | -1.1721 | 3169.35... |
|                   |        |       |             |                         |               | 0.80              | 84   | FCHPILVR                 | ICAT-C(C)@2        |                | -0.0302 | 1210.63... |
|                   |        |       |             |                         |               | 0.00              | < 1  | AANAGLVNALNLIKHIKDM...   |                    | cleaved H-...  | -0.5880 | 5014.04... |
|                   |        |       |             |                         |               | 0.00              | < 1  | ASLA LNTTMASSLR TQVSA... | Deamidated(N)@6    | missed R-T...  | -0.1320 | 2607.28... |
|                   |        |       |             |                         |               | 0.00              | < 1  | EDIKEL LNTKFCHPILVR      | ICAT-C(C)@12       | missed K-F...  | -0.1001 | 2394.20... |
|                   |        |       |             |                         |               | 0.00              | < 1  | EGPGAPGGQSWTPEWLKFD...   | Oxidation(P)@6     | cleaved Y-...  | -0.0339 | 2438.04... |
|                   |        |       |             |                         |               | 0.00              | < 1  | EGPGAPGGQSWTPEWLKFD...   | Oxidation(D)@19    | cleaved Y-...  | -0.0196 | 2438.06... |
|                   |        |       |             |                         |               | 0.00              | < 1  | ELKHAANAGLVNALNLIK       | Oxidation(N)@12    | cleaved I-E... | -0.1255 | 1903.95... |
|                   |        |       |             |                         |               | 0.00              | < 1  | ERASLA LNTTMASSLR TQV... | Deamidated(R)@2    | cleaved A-...  | -0.0027 | 2356.15... |

## Protein Sequence Coverage - stromal ascorbate peroxidase [Brassica oleracea]

MAERASLA LNTTMASSLR TQVSAFRLRLRFSSSGSKL SFPSSLSFTRSLVSSPLLSQKRCQAALVNR SFSSAATHCTAATDPEQLKSAREDIKEL LNTKFCHPILVRLGWH DAGTYNKNI SEWPQRG  
 GANGSLRYEIELKHAANAGLVNALNLIKHIKDMYSGISYADLFQLASATAIEEAGGPKIPMKYGRVDTSGPHECPEEGRLPDAGPPSPANHLREVFYRMGLDDKDIVALSGAHTLGRSRPERSGWGPK  
 ETKYTKEGPGAPGGQSWTPEWLKFDNSYFTEIKEKRDEDLVLPTDAAI FEDPSFKVYAEKYAADQDAFFKDYAESHA KLSNLGAKFNPPEGII I

# gi|14764532 Monodehydroascorbate reductase

## Proteins Detected

| N  | Unu... | Total | % Cov | Accessio... | Name                                               | Species                         | Peptides(95%) | Biological Processes | Molecular Functions | PANT |
|----|--------|-------|-------|-------------|----------------------------------------------------|---------------------------------|---------------|----------------------|---------------------|------|
| 57 | 2.07   | 2.07  | 60.7  | gi 15237... | succinyl-CoA synthetase, alpha subunit [Arabido... | Arabidopsis thaliana            | 2             |                      |                     |      |
| 58 | 2.07   | 2.07  | 44.0  | gi 15242... | NADH dehydrogenase [Arabidopsis thaliana]          | Arabidopsis thaliana            | 2             |                      |                     |      |
| 59 | 2.06   | 2.06  | 39.2  | gi 15222... | vacuolar ATP synthase subunit C, putative [Arab... | Arabidopsis thaliana            | 1             |                      |                     |      |
| 60 | 2.03   | 2.03  | 56.6  | gi 31043... | glutamate-cysteine ligase [Brassica juncea]        | Brassica juncea                 | 1             |                      |                     |      |
| 61 | 2.03   | 2.03  | 60.8  | gi 14764... | monodehydroascorbate reductase [Brassica rap...    | Brassica rapa subsp. pekinensis | 2             |                      |                     |      |

## Protein Group 61 - monodehydroascorbate reductase [Brassica rapa subsp. pekinensis]

| Proteins in Group |        |       |             |                      |                | Peptides in Group |      |                        |                                                     |                |         |            |
|-------------------|--------|-------|-------------|----------------------|----------------|-------------------|------|------------------------|-----------------------------------------------------|----------------|---------|------------|
| N                 | Unu... | Total | Accession # | Name                 | Species        | Con...            | Conf | Sequence               | Modifications                                       | Cleavages      | ΔMass   | Prec MW    |
| 61                | 2.03   | 2.03  | gi 14764532 | monodehydroascorb... | Brassica rapa  | 2.00              | 99   | LPGFHCCVGGGGEK         | ICAT-C:13C(9)(C)@6<br>ICAT-C:13C(9)(C)@7            |                | -0.1058 | 1861.82... |
|                   | 0.00   | 2.01  | gi 46093475 | monodehydroascorb... | Brassica oler  | 0.02              | 5    | ARPLTALFK              |                                                     | cleaved G-...  | -0.0286 | 1015.58... |
|                   | 0.00   | 2.00  | gi 15231702 | monodehydroascorb... | Arabidopsis th | 0.01              | 1    | LKMYGDMRRVEHVDHSRKS... | Deamidated(R)@9<br>Phospho(S)@19<br>Oxidation(K)@25 | cleaved P-L... | -0.0296 | 3066.42... |
|                   |        |       |             |                      |                | 0.00              | < 1  | AEKSFKYIILGGGVSAGYA... |                                                     | cleaved M-...  | -0.1508 | 2129.00... |
|                   |        |       |             |                      |                | 0.00              | < 1  | ARPSAESLDELVKQGISFA... | Oxidation(R)@2<br>Oxidation(F)@18                   | missed K-Q...  | -0.1556 | 2248.01... |
|                   |        |       |             |                      |                | 0.00              | < 1  | ARPSAESLDELVKQGISFA... | Deamidated(R)@2<br>Deamidated(Q)@14                 | missed K-Q...  | -0.0389 | 2331.19... |

## Protein Sequence Coverage - monodehydroascorbate reductase [Brassica rapa subsp. pekinensis]

MAEKSFKYIILGGGVSAGYAAK<sup>E</sup>FASQGVKPGELAVISK<sup>E</sup>EAVAPYERPALSKGYLFPEGAAR<sup>L</sup>LPGFHCCVGGGGEK<sup>L</sup>LLPE<sup>S</sup>YK<sup>Q</sup>KGIELILSTELVKADLA<sup>A</sup>AKSLVSAAGDVF<sup>K</sup>YETLI<sup>I</sup>ATG<sup>S</sup>TVLR<sup>L</sup>  
LTD<sup>F</sup>GVK<sup>G</sup>ADSKN<sup>I</sup>LYLRE<sup>I</sup>DDADK<sup>V</sup>VEAI<sup>Q</sup>AKKGGKAVVGGGYI<sup>G</sup>LELSAALR<sup>I</sup>NNF<sup>D</sup>VTMVFPEPWCMPRLFTADIAAFYETYYTNKGVK<sup>I</sup>IKGT<sup>V</sup>ASGFTAHPNGEVNEVQLK<sup>D</sup>GRSLEAD<sup>I</sup>VI<sup>I</sup>  
VGVGARPLTALFK<sup>Q</sup>VEEDKGGIK<sup>T</sup>DAFFKTSVPDVYAVGDVATF<sup>L</sup>LKMYGDMRRVEHVDHSRKS<sup>A</sup>E<sup>Q</sup>AVKAIKAAEGGAVEEY<sup>D</sup>YLPFFYSRSF<sup>D</sup>LSW<sup>Q</sup>FYGDNVGDSVLF<sup>G</sup>SDSN<sup>P</sup>SNPK<sup>R</sup>PRFGAY<sup>I</sup>  
WVQDGKVVGA<sup>F</sup>MEGGSGDEN<sup>K</sup>ALAKVAKARPAESLE<sup>D</sup>LT<sup>K</sup>QGISFAAK<sup>I</sup>

# gi|15227559 Tubulin beta-7 chain

## Proteins Detected

| N  | Unu... | Total | % Cov | Accessio... | Name                                               | Species              | Peptides(95%) | Biological Processes | Molecular Functions | PANT |
|----|--------|-------|-------|-------------|----------------------------------------------------|----------------------|---------------|----------------------|---------------------|------|
| 8  | 7.31   | 7.31  | 40.6  | gi 15232... | reversibly glycosylated polypeptide-1[Arabidops... | Arabidopsis thaliana | 6             |                      |                     |      |
| 9  | 6.90   | 6.90  | 57.5  | gi 15227... | tubulin beta-7 chain [Arabidopsis thaliana]        | Arabidopsis thaliana | 4             |                      |                     |      |
| 10 | 6.62   | 6.62  | 80.4  | gi 15240... | 33 kDa polypeptide of oxygen-evolving complex...   | Arabidopsis thaliana | 7             |                      |                     |      |
| 11 | 6.25   | 6.25  | 57.1  | gi 15242... | putative protein [Arabidopsis thaliana]            | Arabidopsis thaliana | 5             |                      |                     |      |
| 12 | 6.02   | 6.02  | 48.0  | gi 15224... | cytoplasmic aconitate hydratase[Arabidopsis th...  | Arabidopsis thaliana | 7             |                      |                     |      |

## Protein Group 9 - tubulin beta-7 chain [Arabidopsis thaliana]

| Proteins in Group |        |       |              |                            |                   | Peptides in Group |      |                        |                                                               |                |         |            |
|-------------------|--------|-------|--------------|----------------------------|-------------------|-------------------|------|------------------------|---------------------------------------------------------------|----------------|---------|------------|
| N                 | Unu... | Total | Accession #  | Name                       | Species           | Con...            | Conf | Sequence               | Modifications                                                 | Cleavages      | ΔMass   | Prec MW    |
| 9                 | 6.90   | 6.90  | gi 15227559  | tubulin beta-7 chain [...] | Arabidopsis th... | 2.00              | 99   | EILHIQGGQCGNQIGSK      | ICAT-C:13C(9)(C)@10                                           |                | -0.0371 | 2017.00... |
|                   | 0.00   | 6.90  | gi 15239914  | tubulin beta-6 chain (s... | Arabidopsis th... | 2.00              | 99   | RKLAVNLIPFPR           | Lys->Ala@2                                                    | cleaved L-R... | -0.0652 | 1365.75... |
|                   | 0.00   | 6.90  | gi 147224105 | unnamed protein prod...    | Brassica napu...  | 2.00              | 99   | VNVYYNEASCGR           | ICAT-C(C)@10                                                  |                | -0.0520 | 1600.67... |
|                   |        |       |              |                            |                   | 0.57              | 73   | VSDTVVEPYNATLSVHQLV... | ICAT-C:13C(9)(C)@25<br>Oxidation(M)@26<br>ICAT-C:13C(9)(C)@37 |                | -0.0716 | 4902.28... |
|                   |        |       |              |                            |                   | 0.17              | 33   | KLAVNLIPFPR            | Oxidation(K)@1<br>Ala->Tyr@3                                  | missed K-L...  | -0.0291 | 1374.77... |
|                   |        |       |              |                            |                   | 0.10              | 20   | QVCHSLGGGTGSGMGTLLI... | ICAT-C(C)@3<br>Oxidation(H)@4<br>Dethiomethyl(M)@14           | cleaved F-Q... | -0.0116 | 2224.11... |

## Protein Sequence Coverage - tubulin beta-7 chain [Arabidopsis thaliana]

MR**E**ILHIQGGQCGNQIGSK**F**WEVVNLEHGIDQ**T**GRVYVGDSELQLER**V**NVYYNEASCGRVYVPR**A**VLM**D**LEPGTMD**S**VRS**G**PY**Q**IFR**P**DNFV**F**FG**S**GAGNNWAKGHYTEGAELIDSVLDVVRKEA**E**NC**D**  
 CL**Q**GF**Q**V**C**HSLGGGTGSGMGTLLI**S**KIREEY**P**DRMM**M**T**F**SV**F**PS**P**K**V**SD**T**V**V**EPY**N**ATLSVHQL**V**EN**A**DE**C**M**V**LD**N**EAL**Y**D**I**CP**R**TL**K**L**S**T**P**S**F**GL**N**HL**I**S**A**T**M**S**G**V**T**C**C**LR**F**PG**Q**L**N**SD**L**R**K**L**A**V**N**  
 L**I**PF**P**RL**H**FF**M**V**G**FA**P**L**T**SR**G**S**Q**Y**R**N**L**TV**P**EL**T**Q**M**WD**A**K**N**MM**C**AA**D**PR**H**GR**Y**LT**A**S**A**M**F**R**G**K**M**S**T**KE**V**DE**Q**ML**N**V**Q**N**K**NS**S**Y**F**VE**W**I**P**NV**K**ST**V**CD**I**PP**T**GL**K**MA**S**T**F**IG**N**ST**S**I**Q**EM**F**RR**V**SE**Q**  
 FT**A**M**F**RR**K**AF**L**HW**Y**T**G**EG**M**DE**M**E**F**TE**A**ES**N**M**N**DL**V**SE**Y**Q**Y**Q**D**AT**A**DE**E**GE**Y**EEEE**A**E**Y**EQ**E**ET**Y**



# gi|15238333 Cell division protein FtsH

## Proteins Detected

| N  | Unu... | Total | % Cov | Accessio... | Name                                                | Species              | Peptides(95%) | Biological Processes | Molecular Functions | PANT |
|----|--------|-------|-------|-------------|-----------------------------------------------------|----------------------|---------------|----------------------|---------------------|------|
| 26 | 4.02   | 4.02  | 32.8  | gi 15241... | formate dehydrogenase (FDH)[Arabidopsis thali...    | Arabidopsis thaliana | 7             |                      |                     |      |
| 27 | 3.90   | 3.90  | 57.0  | gi 15237... | H+-transporting ATPase chain E, vacuolar [Arab...   | Arabidopsis thaliana | 3             |                      |                     |      |
| 28 | 3.60   | 3.60  | 44.5  | gi 15220... | putative alanine aminotransferase [Arabi...         | Arabidopsis thaliana | 2             |                      |                     |      |
| 29 | 3.58   | 3.58  | 57.8  | gi 15224... | 3-isopropylmalate dehydratase, small subunit [A...  | Arabidopsis thaliana | 2             |                      |                     |      |
| 30 | 3.12   | 3.12  | 52.0  | gi 15238... | cell division protein FtsH [Arabidopsis thaliana]   | Arabidopsis thaliana | 1             |                      |                     |      |
| 31 | 3.09   | 44.66 | 89.0  | gi 414103   | myrosinase, thioglucoside glucohydrolase [Bras...   | Brassica napus       | 64            |                      |                     |      |
| 32 | 2.89   | 2.89  | 55.1  | gi 15219... | phosphoglycerate kinase, putative [Arabidopsis t... | Arabidopsis thaliana | 2             |                      |                     |      |
| 33 | 2.86   | 2.86  | 36.5  | gi 15229    | S-adenosyl-L-homocysteine, putative [Arabidop...    | Arabidopsis thaliana | 2             |                      |                     |      |

## Protein Group 30 - cell division protein FtsH [Arabidopsis thaliana]

| Proteins in Group |        |       |             |                           |                   | Peptides in Group |      |                        |                                                                        |                |         |            |
|-------------------|--------|-------|-------------|---------------------------|-------------------|-------------------|------|------------------------|------------------------------------------------------------------------|----------------|---------|------------|
| N                 | Unu... | Total | Accession # | Name                      | Species           | Con...            | Conf | Sequence               | Modifications                                                          | Cleavages      | ΔMass   | Prec MW    |
| 30                | 3.12   | 3.12  | gi 15238333 | cell division protein...  | Arabidopsis th... | 2.00              | 99   | GCLLVGPPGTGK           | ICAT-C:13C(9)(C)@2                                                     |                | -0.0340 | 1333.71... |
|                   | 0.01   | 3.11  | gi 1522913  | chloroplast FtsH prote... | Arabidopsis th... | 1.10              | 92   | PKGCLLVGPPGTGK         | Cys->Asn@4                                                             | cleaved I-P... | -0.0583 | 1333.71... |
|                   |        |       |             |                           |                   | 0.01              | 3    | PLFIQNEILKAPSPK        | Deamidated(N)@6<br>Methyl(K)@10                                        | cleaved S-...  | -0.1083 | 1708.86... |
|                   |        |       |             |                           |                   | 0.01              | 3    | RGQGGAGGPGGLGGP        | Pro->pyro-Glu(P)@16                                                    | cleaved F-...  | 0.0807  | 1264.67... |
|                   |        |       |             |                           |                   | 0.01              | 2    | GGQGGAGGPGGLGGPMDPGR   | Leu->Val@12                                                            |                | 0.0538  | 1686.80... |
|                   |        |       |             |                           |                   | 0.00              | 1    | AKSKAPCIVFIDEIDAVGR... | No ICAT(C)@7<br>Oxidation(D)@12<br>Oxidation(D)@15<br>Deamidated(R)@19 | missed K-S...  | -0.2283 | 2347.98... |
|                   |        |       |             |                           |                   | 0.00              | < 1  | AATNRPDVLDSALLRPGR     | Deamidated(N)@4                                                        | cleaved L-A... | -0.1403 | 1939.85... |

## Protein Sequence Coverage - cell division protein FtsH [Arabidopsis thaliana]

MATTSSNPLLLSSNFLGSQIIISAPTPKTTTKSLPFSVISRKRYQISQSEKLMKSLPSQAALAAALLFSSSSPQALAVNEPVQPPAPTITAEAQSPNLSTFGQNVLMTAPNPQAQSSDLPDGTQWRYSE  
 FLNAVKKGKVERVKFSKDGSVLQLTAVDNRRATVIVPNDPDLIDI LAMNGVDI SVSEEGGNLDFDIGNLLFPLAFGLFYLRGGQGGAGGPGGLGGPMDPGRSKSKFQVEVPETGVTFGDVAGAD  
 QAKLELQEVVDLKNPKDY TALGAKI PKGCLLVGPPGTGKILLARAVAGEAGVPFFSCAASEFVELFVGVGASRVRDLFEKAKSKAPCIVFIDEIDAVGRQRGAGMGGGNDEREQTINQLLTEMDFGS  
 GNSGVIVLAATNRPDVLDSALLRPGRFDRQVTVDPRDPAVGRVQILKVHSGRAIGKDVVDYEVARRTPGFTGADLQNLMEAAI LAARRELKEISKDEISDALERI IAGPEKKNVAVSEKKRLVAYH  
 EAGHALVGMPEYDPVAKISIIIPRQAGGLTFFAPSEERLESGLYSRSYLENQMAVALGGRVAEEVIFGDENVTTGASNDFMQVSRVARQMVVERFGFSKKIGQVAVGGAGGNPFLGQSMSSQKDYSM  
 ATADVDDAEVRELVEKAYVRAKEIITITQIDILHKLALQLLIEKETVDGEEFMSLFDGQAEIYVS

# gi|134273558 Unnamed protein product

## Proteins Detected

| N  | Unu... | Total | % Cov | Accessio... | Name                                                   | Species              | Peptides(95%) | Biological Processes | Molecular Functions | PANT |
|----|--------|-------|-------|-------------|--------------------------------------------------------|----------------------|---------------|----------------------|---------------------|------|
| 48 | 2.19   | 2.19  | 62.4  | gi 13427... | unnamed protein product [Brassica napus]               | Brassica napus       | 2             |                      |                     |      |
| 49 | 2.19   | 2.19  | 30.6  | gi 15227... | enolase (2-phospho-D-glycerate hydroxylase) [Ar...     | Arabidopsis thaliana | 1             |                      |                     |      |
| 50 | 2.17   | 2.17  | 28.0  | gi 18141... | senescence-associated cysteine protease [Bras...       | Brassica oleracea    | 2             |                      |                     |      |
| 51 | 2.16   | 2.16  | 62.7  | gi 15228... | peptidylprolyl isomerase ROC4 [Arabidopsis thal...     | Arabidopsis thaliana | 3             |                      |                     |      |
| 52 | 2.15   | 2.15  | 44.4  | gi 15219... | hypothetical protein [Arabidopsis thaliana]            | Arabidopsis thaliana | 2             |                      |                     |      |
| 53 | 2.14   | 2.14  | 36.0  | gi 31321... | putative papillar cell-specific calnexin [Brassica...  | Brassica napus       | 1             |                      |                     |      |
| 54 | 2.12   | 2.12  | 45.1  | gi 15222... | putative calcium-binding protein, calreticulin [Ara... | Arabidopsis thaliana | 2             |                      |                     |      |
| 55 | 2.12   | 2.12  | 47.1  | nl 28974    | NAD-dependent isocitrate dehydrogenase beta            | Brassica napus       | 1             |                      |                     |      |

## Protein Group 48 - unnamed protein product [Brassica napus]

| Proteins in Group |        |       |              |                          |                   | Peptides in Group |      |                        |                                                                     |               |         |            |
|-------------------|--------|-------|--------------|--------------------------|-------------------|-------------------|------|------------------------|---------------------------------------------------------------------|---------------|---------|------------|
| N                 | Unu... | Total | Accession #  | Name                     | Species           | Con...            | Conf | Sequence               | Modifications                                                       | Cleavages     | ΔMass   | Prec MW    |
| 48                | 2.19   | 2.19  | gi 134273558 | unnamed protein pro...   | Brassica napus    | 2.00              | 99   | LLICGGSAYPR            | ICAT-C:13C(9)(C)@4                                                  |               | -0.0835 | 1384.67... |
|                   | 0.02   | 2.02  | gi 15236375  | hydroxymethyltransfer... | Arabidopsis th... | 0.19              | 36   | LCDLCNITLNK            | ICAT-C:13C(9)(C)@2<br>ICAT-C:13C(9)(C)@5                            |               | -0.0843 | 1720.85... |
|                   |        |       |              |                          |                   | 0.02              | 4    | EMPGFLMSEMK            | Phospho(S)@8                                                        | cleaved Y-... | 0.0348  | 1378.57... |
|                   |        |       |              |                          |                   | 0.00              | < 1  | AGMI FYR               | Gly->Pro@2<br>Oxidation(M)@3                                        |               | -0.0253 | 912.4275   |
|                   |        |       |              |                          |                   | 0.00              | < 1  | AMDFRPKLLICGGSAYPR     | Oxidation(M)@2<br>Deamidated(R)@5<br>Oxidation(P)@6<br>ICAT-C(C)@11 | missed K-L... | -0.0459 | 2254.07... |
|                   |        |       |              |                          |                   | 0.00              | < 1  | AMDFRPKLLICGGSAYPRD... | ICAT-C(C)@11<br>Deamidated(R)@18                                    | missed K-L... | 0.0635  | 3782.96... |

## Protein Sequence Coverage - unnamed protein product [Brassica napus]

MDPVSSWGNTPLVTVDPEIHDLEIEKEKRRQCRGIELIASENFTSFVIEALGSALTNKYSEGMPGNRYGGNEFIDQIENLCQSRALAEAFRLASASWGVNVQPYSGSPANFAAYTALLQPHDRIMGLD  
LPSGGHLTHGYTSGGKKISATSIYFESLPYKVNFTTGYIDYDKLEEKAMDFRPKLLICGGSAYPRDWDYARLRAVADKVGALLCDMAHISGLVAAQEAANPFEYCDVVTITTHKSLRGPRAGMI FY  
RKGPKPPKQPEGAVYDFEDKINFAVFPALQGGPHNHQIGALAVALKQANTPGFKVYAKQVKAVALANLYLMGKGYISVTGGTENHLVLDLRLPLGLTGKVEKLCDLCNITLNKNAVFGDSSALA  
PGGVRIGTPAMTSRGLVEKDFEMIGEFILSRSVTTLTINI QKEHGKLLKDFNKGLVNNKEIEELKADVEKFSAS YEMPGFLMSAMKYQD

## Figure S6

This set of supplemental data contains the information of the coverage, peptides and MS/MS spectrum (if only one peptide identified for the protein) of each protein identified to be redox sensitive to MeJA treatment in guard cells by redox DIGE.



# gi|109389998 Chlorophyll a/b binding protein

## Protein View

Match to: gi|109389998 Score: 65

chloroplast chlorophyll a/b binding protein [Brassica napus]

Found in search of D:\Sixue Chen-don't delete please\20091115MMZ\DEC01\2315DEC04.wiff

Nominal mass ( $M_r$ ): 28363; Calculated pI value: 5.48

NCBI BLAST search of [gi|109389998](#) against nr

Unformatted [sequence string](#) for pasting into other applications

Taxonomy: [Brassica napus](#)

Fixed modifications: Carbamidomethyl (C)

Variable modifications: Deamidated (NQ), Gln->pyro-Glu (N-term Q), Oxidation (M)

Cleavage by Trypsin: cuts C-term side of KR unless next residue is P

Sequence Coverage: 4%

Matched peptides shown in **Bold Red**

```
1 MAASTMALSS PAFAGKAVKL SPAASEVLGS GRVTMRKTVA KPKGPSGSPW
51 YGSERVKYLG PFSGEPPSYL TGEFPGDYGW DTAGLSADPE TFARNRELQV
101 IHCRWAMLGA LGCVPPELLA RNGVKFGEAV WFKAGSQIFS EGGLDYLGNP
151 SLVHAQSILA IWATQVILMG AVEGYRVAGD GPLGEAEDLL YPGGSFDPLG
201 LATDPEAFAE LKVKEIKNGR LAMFSMFGFF AQAIVTGKGP LENLADHLAD
251 PVNNAWAFa TNFVPGK
```

| Start - End | Observed | Mr(expt)  | Mr(calc)  | Delta  | Miss | Sequence                  |                                   |
|-------------|----------|-----------|-----------|--------|------|---------------------------|-----------------------------------|
| 44 - 55     | 640.4367 | 1278.8588 | 1278.5629 | 0.2959 | 0    | K. <b>GPSGSPWYGSER</b> .V | ( <a href="#">Ions score 65</a> ) |

## Peptide View

MS/MS Fragmentation of **GPSGSPWYGSER**

Found in **gi109389998**, chloroplast chlorophyll a/b binding protein [Brassica napus]

| #  | b               | b <sup>++</sup> | b <sup>0</sup>  | b <sup>0++</sup> | Seq.     | y                | y <sup>++</sup> | y*              | y <sup>*++</sup> | y <sup>0</sup>   | y <sup>0++</sup> | #  |
|----|-----------------|-----------------|-----------------|------------------|----------|------------------|-----------------|-----------------|------------------|------------------|------------------|----|
| 1  | 58.0287         | 29.5180         |                 |                  | <b>G</b> |                  |                 |                 |                  |                  |                  | 12 |
| 2  | <b>155.0815</b> | 78.0444         |                 |                  | <b>P</b> | 1222.5487        | <b>611.7780</b> | 1205.5222       | 603.2647         | 1204.5382        | 602.7727         | 11 |
| 3  | <b>242.1135</b> | 121.5604        | <b>224.1030</b> | 112.5551         | <b>S</b> | <b>1125.4960</b> | 563.2516        | 1108.4694       | <b>554.7383</b>  | <b>1107.4854</b> | <b>554.2463</b>  | 10 |
| 4  | 299.1350        | 150.0711        | 281.1244        | 141.0659         | <b>G</b> | <b>1038.4639</b> | 519.7356        | 1021.4374       | 511.2223         | <b>1020.4534</b> | 510.7303         | 9  |
| 5  | <b>386.1670</b> | 193.5872        | <b>368.1565</b> | 184.5819         | <b>S</b> | <b>981.4425</b>  | 491.2249        | 964.4159        | 482.7116         | <b>963.4319</b>  | 482.2196         | 8  |
| 6  | 483.2198        | <b>242.1135</b> | 465.2092        | 233.1082         | <b>P</b> | <b>894.4104</b>  | <b>447.7089</b> | 877.3839        | 439.1956         | <b>876.3999</b>  | 438.7036         | 7  |
| 7  | 669.2991        | 335.1532        | <b>651.2885</b> | 326.1479         | <b>W</b> | <b>797.3577</b>  | 399.1825        | <b>780.3311</b> | 390.6692         | 779.3471         | 390.1772         | 6  |
| 8  | 832.3624        | 416.6849        | 814.3519        | 407.6796         | <b>Y</b> | <b>611.2784</b>  | 306.1428        | <b>594.2518</b> | 297.6295         | 593.2678         | 297.1375         | 5  |
| 9  | 889.3839        | 445.1956        | 871.3733        | 436.1903         | <b>G</b> | <b>448.2150</b>  | <b>224.6112</b> | 431.1885        | 216.0979         | 430.2045         | 215.6059         | 4  |
| 10 | 976.4159        | 488.7116        | 958.4054        | 479.7063         | <b>S</b> | <b>391.1936</b>  | <b>196.1004</b> | 374.1670        | 187.5871         | 373.1830         | 187.0951         | 3  |
| 11 | 1105.4585       | 553.2329        | 1087.4479       | 544.2276         | <b>E</b> | 304.1615         | 152.5844        | 287.1350        | 144.0711         | 286.1510         | 143.5791         | 2  |
| 12 |                 |                 |                 |                  | <b>R</b> | <b>175.1190</b>  | 88.0631         | 158.0924        | 79.5498          |                  |                  | 1  |

# gi|4585935 Light harvesting chlorophyll A/B binding protein

## Protein View

Match to: gi|4585935 Score: 75  
putative chlorophyll a/b binding protein [Arabidopsis thaliana]  
Found in search of D:\Sixue Chen-don't delete please\20091115MMZ\DEC01\2200DEC04.wiff

Nominal mass ( $M_r$ ): 28659; Calculated pI value: 5.29  
NCBI BLAST search of [gi|4585935](#) against nr  
Unformatted [sequence string](#) for pasting into other applications

Taxonomy: [Arabidopsis thaliana](#)

Fixed modifications: Carbamidomethyl (C)  
Variable modifications: Deamidated (NQ), Gln->pyro-Glu (N-term Q), Oxidation (M)  
Cleavage by Trypsin: cuts C-term side of KR unless next residue is P  
Sequence Coverage: 5%

Matched peptides shown in **Bold Red**

```
1 MATSAIQQSS FAGQTALKPS SDLIQKVGVL GGGRVTMRRT VKSTPQSIWY
51 GPDRPKYLGP FSENTPSYLT GEYPGDYGWD TAGLSADPET FAKNRELEVI
101 HSRWAMLGAL GCTFPEILSK NGVKFGEAVW FKAGSQIFSE GGLDYLGPNP
151 LIHAQSILAI WAVQVVMGF IEGYRIGGGP LGEGLDPLYP GGAFDPLNLA
201 EDPEAFSELK VKELKNGRLA MFSMFGFFVQ AIVTGKGPKE NLFDHLADPV
251 ANNAWSYATN FVPGK
```

Show predicted peptides also

Sort Peptides By

Residue Number  Increasing Mass  Decreasing Mass

| Start - End | Observed | Mr(expt)  | Mr(calc)  | Delta  | Miss | Sequence                  |                                   |
|-------------|----------|-----------|-----------|--------|------|---------------------------|-----------------------------------|
| 43 - 56     | 816.5772 | 1631.1399 | 1630.8103 | 0.3295 | 0    | <b>K.STPQSIWYGPDRPK.Y</b> | ( <a href="#">Ions score 75</a> ) |

## Peptide View

MS/MS Fragmentation of **STPQSIWYGPDRPK**

Found in **gi|4585935**, putative chlorophyll a/b binding protein [Arabidopsis thaliana]

| #  | b         | b <sup>++</sup> | b*        | b <sup>*++</sup> | b <sup>0</sup> | b <sup>0++</sup> | Seq. | y         | y <sup>++</sup> | y*        | y <sup>*++</sup> | y <sup>0</sup> | y <sup>0++</sup> | #  |
|----|-----------|-----------------|-----------|------------------|----------------|------------------|------|-----------|-----------------|-----------|------------------|----------------|------------------|----|
| 1  | 88.0393   | 44.5233         |           |                  | 70.0287        | 35.5180          | S    |           |                 |           |                  |                |                  | 14 |
| 2  | 189.0870  | 95.0471         |           |                  | 171.0764       | 86.0418          | T    | 1544.7856 | 772.8964        | 1527.7591 | 764.3832         | 1526.7750      | 763.8912         | 13 |
| 3  | 286.1397  | 143.5735        |           |                  | 268.1292       | 134.5682         | P    | 1443.7379 | 722.3726        | 1426.7114 | 713.8593         | 1425.7274      | 713.3673         | 12 |
| 4  | 414.1983  | 207.6028        | 397.1718  | 199.0895         | 396.1878       | 198.5975         | Q    | 1346.6852 | 673.8462        | 1329.6586 | 665.3329         | 1328.6746      | 664.8409         | 11 |
| 5  | 501.2304  | 251.1188        | 484.2038  | 242.6055         | 483.2198       | 242.1135         | S    | 1218.6266 | 609.8169        | 1201.6000 | 601.3037         | 1200.6160      | 600.8116         | 10 |
| 6  | 614.3144  | 307.6608        | 597.2879  | 299.1476         | 596.3039       | 298.6556         | I    | 1131.5946 | 566.3009        | 1114.5680 | 557.7876         | 1113.5840      | 557.2956         | 9  |
| 7  | 800.3937  | 400.7005        | 783.3672  | 392.1872         | 782.3832       | 391.6952         | W    | 1018.5105 | 509.7589        | 1001.4839 | 501.2456         | 1000.4999      | 500.7536         | 8  |
| 8  | 963.4571  | 482.2322        | 946.4305  | 473.7189         | 945.4465       | 473.2269         | Y    | 832.4312  | 416.7192        | 815.4046  | 408.2060         | 814.4206       | 407.7139         | 7  |
| 9  | 1020.4785 | 510.7429        | 1003.4520 | 502.2296         | 1002.4680      | 501.7376         | G    | 669.3679  | 335.1876        | 652.3413  | 326.6743         | 651.3573       | 326.1823         | 6  |
| 10 | 1117.5313 | 559.2693        | 1100.5047 | 550.7560         | 1099.5207      | 550.2640         | P    | 612.3464  | 306.6768        | 595.3198  | 298.1636         | 594.3358       | 297.6715         | 5  |
| 11 | 1232.5582 | 616.7828        | 1215.5317 | 608.2695         | 1214.5477      | 607.7775         | D    | 515.2936  | 258.1504        | 498.2671  | 249.6372         | 497.2831       | 249.1452         | 4  |
| 12 | 1388.6593 | 694.8333        | 1371.6328 | 686.3200         | 1370.6488      | 685.8280         | R    | 400.2667  | 200.6370        | 383.2401  | 192.1237         |                |                  | 3  |
| 13 | 1485.7121 | 743.3597        | 1468.6856 | 734.8464         | 1467.7015      | 734.3544         | P    | 244.1656  | 122.5864        | 227.1390  | 114.0731         |                |                  | 2  |
| 14 |           |                 |           |                  |                |                  | K    | 147.1128  | 74.0600         | 130.0863  | 65.5468          |                |                  | 1  |

# gi|1346967 Ribulose biphosphate carboxylase large chain

## Protein View

Match to: gi|1346967 Score: 535

RecName: Full=Ribulose biphosphate carboxylase large chain; Short=RuBisCO large subunit; Flags: Precursor  
Found in search of C:\QStar Share Data\20091115MMZ\NOV26\850NOV26.wiff

Nominal mass (M<sub>r</sub>): 53436; Calculated pI value: 5.88

NCBI BLAST search of [gi|1346967](#) against nr

Unformatted [sequence string](#) for pasting into other applications

Taxonomy: [Brassica oleracea](#)

Fixed modifications: Carbamidomethyl (C)

Variable modifications: Deamidated (NQ),Gln->pyro-Glu (N-term Q),Oxidation (M)

Cleavage by Trypsin: cuts C-term side of KR unless next residue is P

Sequence Coverage: 21%

Matched peptides shown in **Bold Red**

```
1 MSPQTETKAS VGFKAGVKEY KLNYTPEYE TKDTDILAAF RVTPQPGVPP
51 EEAGAAVAAE SSTGTWTTVW TDGLTSLDRY KGRCYHIEPV PGEETQFIAY
101 VAYPLDLFEE GSVTNMFTSI VGNVFGFKAL AALRLEDLRI PPAYTKTFQG
151 PPHGIQVERD KLNKYGRPLL GCTIKPKLGL SAKNYGRAVY ECLRGGLDFT
201 KDDENVNSQP FMRRWRDRFLF CAEAIYKSA ETGEIKGHYL NATAGTCEEM
251 MKRAIFAREL GVPIVMHDYL TGGFTANTSL AHYCRDNGLL LHIHRAMHAV
301 IDRQKNHGMH FRVLAKALRL SGGDHVHAGT VVGKLEGDRE STLGFVDLLR
351 DDYVEKDRSR GIFFTQDWVS LPGVLPVASG GIHVWHMPAL TEIFGDDSVL
401 QFGGGTLGHP WGNAPGAVAN RVALEACVQA RNEGRDLAVE GNEIIREACK
451 WSPELAAACE VWKEITFNFP TIDKLDGQD
```

| Start - End | Observed | Mr(expt)  | Mr(calc)  | Delta  | Miss | Sequence                                                                |
|-------------|----------|-----------|-----------|--------|------|-------------------------------------------------------------------------|
| 22 - 32     | 710.8920 | 1419.7694 | 1419.6558 | 0.1136 | 0    | K.LNYYTPEYETK.D ( <a href="#">Ions score 68</a> )                       |
| 33 - 41     | 511.3407 | 1020.6669 | 1020.5240 | 0.1429 | 0    | K.DTDILAAFR.V ( <a href="#">Ions score 50</a> )                         |
| 147 - 159   | 489.3349 | 1464.9828 | 1464.7474 | 0.2354 | 0    | K.TFQPPPHGIQVER.D ( <a href="#">Ions score 55</a> )                     |
| 195 - 213   | 724.0806 | 2169.2199 | 2168.9797 | 0.2403 | 1    | R.GGLDFTKDDENVNSQPFMR.W ( <a href="#">Ions score 64</a> )               |
| 195 - 213   | 729.4117 | 2185.2132 | 2184.9746 | 0.2386 | 1    | R.GGLDFTKDDENVNSQPFMR.W Oxidation (M) ( <a href="#">Ions score 71</a> ) |
| 202 - 213   | 726.9062 | 1451.7978 | 1451.5987 | 0.1991 | 0    | K.DDENVNSQPFMR.W Deamidated (NQ) ( <a href="#">Ions score 42</a> )      |
| 202 - 213   | 734.3873 | 1466.7600 | 1466.6096 | 0.1504 | 0    | K.DDENVNSQPFMR.W Oxidation (M) ( <a href="#">Ions score 43</a> )        |
| 320 - 334   | 717.4532 | 1432.8918 | 1432.7423 | 0.1495 | 0    | R.LSGGDHVHAGTVVGK.L ( <a href="#">Ions score 50</a> )                   |
| 340 - 350   | 625.4218 | 1248.8290 | 1248.6714 | 0.1576 | 0    | R.ESTLGFVDLLR.D ( <a href="#">Ions score 75</a> )                       |
| 436 - 446   | 614.9055 | 1227.7964 | 1227.6459 | 0.1505 | 0    | R.DLAVEGNEIIR.E ( <a href="#">Ions score 53</a> )                       |
| 464 - 474   | 662.9194 | 1323.8242 | 1323.6711 | 0.1531 | 0    | K.EITFNFPPTIDK.L ( <a href="#">Ions score 62</a> )                      |
| 464 - 479   | 927.0402 | 1852.0658 | 1851.8891 | 0.1767 | 1    | K.EITFNFPPTIDKLDGQD.- ( <a href="#">Ions score 10</a> )                 |

# gi|18405145 Rubisco activase (RCA)

## Protein View

Match to: gi|18405145 Score: 342

RCA (RUBISCO ACTIVASE); ADP binding / ATP binding / enzyme regulator/ ribulose-1,5-bisphosphate

Found in search of C:\QStar Share Data\20091115MMZ\NOV26\1378NOV26.wiff

Nominal mass ( $M_r$ ): 52347; Calculated pI value: 5.87

NCBI BLAST search of [gi|18405145](#) against nr

Unformatted [sequence string](#) for pasting into other applications

Taxonomy: [Arabidopsis thaliana](#)

Fixed modifications: Carbamidomethyl (C)

Variable modifications: Deamidated (NQ), Gln->pyro-Glu (N-term Q), Oxidation (M)

Cleavage by Trypsin: cuts C-term side of KR unless next residue is P

Sequence Coverage: 11%

Matched peptides shown in **Bold Red**

```
1  MAAAVSTVGA  INRAPLSLNG  SGSGAVSAPA  STFLGKKVVT  VSRFAQSNKK
51  SNGSFKVLAV  KEDKQTDGDR  WRGLAYDTSD  DQQDITRGKG  MVDSVVFQAPM
101 GTGTHHAVLS  SYEYVSQGLR  QYNLDNMMDG  FYIAPAFMDK  LVVHITKNFL
151 TLPNIKVPLI  LGIWGGKGQG  KSFQCELVMA  KMGINPIMMS  AGELESGNAG
201 EPAKLIRQRY  REAADLIKKG  KMCCLFINDL  DAGAGRMGGT  TQYTVNNQMV
251 NATLMNIADN  PTNVQLPGMY  NKEENARVPI  ICTGNDFSTL  YAPLIRDGRM
301 EKFYWAPTRE  DRIGVCKGIF  RTDKIKDEDI  VTLVDQFPGQ  SIDFFGALRA
351 RVYDDEVRKF  VESLGVEKIG  KRLVNSREGP  PVFEQPEMTY  EKLMEYGNML
401 VMEQENVKRV  QLAETYLSQA  ALGDANADAI  GRGTFYGKGA  QQVNLPVPEG
451 CTDPVAENFD  PTARSDDGTC  VYNF
```

| Start - End | Observed | Mr(expt)  | Mr(calc)  | Delta  | Miss | Sequence                                                                       |
|-------------|----------|-----------|-----------|--------|------|--------------------------------------------------------------------------------|
| 73 - 87     | 849.4554 | 1696.8962 | 1696.7540 | 0.1422 | 0    | R.GLAYDTSDDQDITR.G ( <a href="#">Ions score 108</a> )                          |
| 182 - 204   | 779.4299 | 2335.2680 | 2335.0494 | 0.2186 | 0    | K.MGINPIMMSAGELESGNAGEPAK.L 2 Oxidation (M) ( <a href="#">Ions score 77</a> )  |
| 182 - 204   | 784.7606 | 2351.2599 | 2351.0443 | 0.2156 | 0    | K.MGINPIMMSAGELESGNAGEPAK.L 3 Oxidation (M) ( <a href="#">Ions score 130</a> ) |
| 393 - 408   | 659.3841 | 1975.1305 | 1974.8737 | 0.2568 | 0    | K.LMEYGNMLVMEQENVK.R 3 Oxidation (M) ( <a href="#">Ions score 55</a> )         |
| 393 - 409   | 711.4039 | 2131.1898 | 2130.9748 | 0.2150 | 1    | K.LMEYGNMLVMEQENVKR.V 3 Oxidation (M) ( <a href="#">Ions score 51</a> )        |

# gi|15237225 High chlorophyll fluorescence 136 (HCF136)

## Protein View

Match to: gi|15237225 Score: 118

HCF136 (High chlorophyll fluorescence 136) [Arabidopsis thaliana]

Found in search of C:\QStar Share Data\20091115MMZ\NOV16\1520NOV15.wiff

Nominal mass ( $M_r$ ): 44133; Calculated pI value: 6.79

NCBI BLAST search of [gi|15237225](#) against nr

Unformatted [sequence string](#) for pasting into other applications

Taxonomy: [Arabidopsis thaliana](#)

Links to retrieve other entries containing this sequence from NCBI Entrez:

[gi|6016183](#) from [Arabidopsis thaliana](#)

[gi|3559807](#) from [Arabidopsis thaliana](#)

[gi|9759370](#) from [Arabidopsis thaliana](#)

[gi|15010780](#) from [Arabidopsis thaliana](#)

[gi|28416529](#) from [Arabidopsis thaliana](#)

Fixed modifications: Carbamidomethyl (C)

Variable modifications: Oxidation (M), Phospho (ST)

Cleavage by Trypsin: cuts C-term side of KR unless next residue is P

Sequence Coverage: 6%

Matched peptides shown in **Bold Red**

```
1 MASLQLCDGY LLFKPSVSPR FLSQRISHRL IPKASSSPPP SPSPPSSSSS
51 LFSRRELLY QSAAVSLSL SIVGPARADE QLSEWERVFL PIDPGVLLD
101 IAFVPDEPSR GFLLGTRQTL LETKDGGSTW NPRSIPSAEE EDFNYRFNSI
151 SFKKGEGWII GKPAILLYTA DAGENWDRIP LSSQLPGDMV FIKATEDKSA
201 EMVTDEGAIY VTSNRGYNWK AAIQETVSAT LNRTVSSGIS GASYYTGTF S
251 AVNRSPDGRY VAVSSRGNFF LTWEPGQPYW QPHNRAVARR IQNMGWRADG
301 GLWLLVRGGG LYLSKGTGIT EEFEEVPVQS RFGGILDVGY RSEEEAWAAG
351 GSGILLRTRN GGKSWNRDKA ADNIAANLYA VKFVDDKKGF VLGNDGVLLR
401 YVG
```

| Start - End      | Observed        | Mr(expt)         | Mr(calc)         | Delta         | Miss     | Sequence                        |                                 |
|------------------|-----------------|------------------|------------------|---------------|----------|---------------------------------|---------------------------------|
| <b>134 - 146</b> | <b>778.8692</b> | <b>1555.7239</b> | <b>1555.6790</b> | <b>0.0448</b> | <b>0</b> | <b>R.SIPSAEEEDFN<b>YR</b>.F</b> | <a href="#">(Ions score 83)</a> |
| <b>370 - 382</b> | <b>667.3863</b> | <b>1332.7581</b> | <b>1332.7037</b> | <b>0.0544</b> | <b>0</b> | <b>K.AADNIAANLYAV<b>K</b>.F</b> | <a href="#">(Ions score 36)</a> |

# gi|18406661 Thylakoid lumenal 15 kDa protein, chloroplast

## Protein View

Match to: gi|18406661 Score: 134

thylakoid lumenal 15 kDa protein, chloroplast [Arabidopsis thaliana]

Found in search of D:\Sixue Chen-don't delete please\20091115MMZ\DEC01\2716.wiff

Nominal mass ( $M_r$ ): 24106; Calculated pI value: 7.55

NCBI BLAST search of [gi|18406661](#) against nr

Unformatted [sequence string](#) for pasting into other applications

Taxonomy: [Arabidopsis thaliana](#)

Fixed modifications: Carbamidomethyl (C)

Variable modifications: Deamidated (NQ), Gln->pyro-Glu (N-term Q), Oxidation (M)

Cleavage by Trypsin: cuts C-term side of KR unless next residue is P

Sequence Coverage: 11%

Matched peptides shown in **Bold Red**

```
1  MVILSNVSLF  SCCNISQKPS  LFSPSSRSSH  CPIRCSQSQE  GKEVVTSPLR
51  SVVWSLGEEV  SKRSLFALVS  ASLFFVDPAL  AFKGGGYPYQ  GVTRGQDLG
101 KDFSGQTLIR  QDFKTSILRQ  ANFKGAKLLG  ASFFDADLTG  ADLSEADLRG
151 ADFSLANVTK  VNLTNANLEG  ATVTGNTSFK  GSNITGADFT  DVPLRDDQRV
201 YLCKVADGVN  ATTNATRDRT  LLCN
```

Show predicted peptides also

Sort Peptides By

Residue Number  Increasing Mass  Decreasing Mass

| Start - End | Observed | Mr(expt)  | Mr(calc)  | Delta  | Miss | Sequence                                              |
|-------------|----------|-----------|-----------|--------|------|-------------------------------------------------------|
| 150 - 160   | 561.9037 | 1121.7929 | 1121.5717 | 0.2212 | 0    | R.GADFSLANVTK.V ( <a href="#">Ions score 60</a> )     |
| 181 - 195   | 782.0118 | 1562.0091 | 1561.7737 | 0.2355 | 0    | K.GSNITGADFTDVPLR.D ( <a href="#">Ions score 74</a> ) |



# gi|21133 Oxygen-evolving complex of photosystem II

## Protein View

Match to: gi|21133 Score: 135

oxygen-evolving complex of photosystem II [Sinapis alba]

Found in search of D:\Sixue Chen-don't delete please\20091115MMZ\DEC01\2287.wiff

Nominal mass ( $M_r$ ): 28079; Calculated pI value: 6.84

NCBI BLAST search of [gi|21133](#) against nr

Unformatted [sequence string](#) for pasting into other applications

Taxonomy: [Sinapis alba](#)

Fixed modifications: Carbamidomethyl (C)

Variable modifications: Deamidated (NQ),Gln->pyro-Glu (N-term Q),Oxidation (M)

Cleavage by Trypsin: cuts C-term side of KR unless next residue is P

Sequence Coverage: 19%

Matched peptides shown in **Bold Red**

```
1  MAYSACFLHQ SALASSTARS SPSSSSQRYV SISKLVCKAQ QTHEEDNSTV
51  SRRALATLLV GAAAVGSKVS PADAAYGEAA NVFGKPKKKNT DFTAYSGDGF
101 QVQVPAKWNP SREVEYPGQV LRYEDNFDAT SNLNVMTPT DKKSITDYGS
151 PEEFLSQVNY LLGKQAYFGE TASEGGFDNN AVATANILET NIQDVGGKPY
201 YYLSVLTRTA DGDEGGKHQL ITATVNGGKL YICKAQAGDK RWFKGANKFV
251 EKAATSFSVA
```

Show predicted peptides also

Sort Peptides By

Residue Number  Increasing Mass  Decreasing Mass

| Start - End | Observed | Mr (expt) | Mr (calc) | Delta  | Miss | Sequence                        |                                                   |
|-------------|----------|-----------|-----------|--------|------|---------------------------------|---------------------------------------------------|
| 88 - 107    | 725.4626 | 2173.3661 | 2173.0328 | 0.3333 | 1    | <b>K.KNTDFTAYSGDGFQVQVPAK.W</b> | Deamidated (NQ) ( <a href="#">Ions score 10</a> ) |
| 113 - 122   | 595.4251 | 1188.8356 | 1188.6139 | 0.2218 | 0    | <b>R.EVEYPGQVLR.Y</b>           | ( <a href="#">Ions score 29</a> )                 |
| 123 - 142   | 764.1269 | 2289.3589 | 2289.0107 | 0.3482 | 0    | <b>R.YEDNFDATSNLNVMTPTDK.K</b>  | Oxidation (M) ( <a href="#">Ions score 64</a> )   |
| 123 - 143   | 806.8225 | 2417.4458 | 2417.1057 | 0.3401 | 1    | <b>R.YEDNFDATSNLNVMTPTDKK.S</b> | Oxidation (M) ( <a href="#">Ions score 32</a> )   |

# gi|5748502 Precursor of the 33 kDa subunit of the oxygen evolving complex

## Protein View

Match to: gi|5748502 Score: 158

precursor of the 33 kDa subunit of the oxygen evolving complex [Arabidopsis thaliana]

Found in search of D:\Sixue Chen-don't delete please\20091115MMZ\DEC01\2073.wiff

Nominal mass ( $M_r$ ): 35226; Calculated pI value: 5.92

NCBI BLAST search of [gi|5748502](#) against nr

Unformatted [sequence string](#) for pasting into other applications

Taxonomy: [Arabidopsis thaliana](#)

Fixed modifications: Carbamidomethyl (C)

Variable modifications: Deamidated (NQ), Gln->pyro-Glu (N-term Q), Oxidation (M)

Cleavage by Trypsin: cuts C-term side of KR unless next residue is P

Sequence Coverage: 19%

Matched peptides shown in **Bold Red**

```
1 MATSLQAAAT FLQPAKIAAS PSRNVHLRSN QTVGKSFGLD SSQARLTCSL
51 HSDLKDFAGK CSDAAKIAGF ALATSALVVS GAGAEGAPKR LTYDEIQSKT
101 YMEVKGTGTA NQCPTIDGGG ETFSFKAGKY TGKKFCFEPT SFTVKADSVS
151 KNAPPDFQNT KLMTRLTYTL DEIEGPFVEG SDGSVKFKEE DGIDYAAVTV
201 QLPGGERVFP LFTVKQLEAS GKPEFSFGKF LVPSYRGSSF LDPKGRGGST
251 GYDNAVALPA GGRGDEEELS KENVKNTAAS VGEITLKITK SKPETGEVIG
301 VFESLQPSDT DLGAKVPKDV KIQGVWYQI E
```

| Start - End | Observed | Mr(expt)  | Mr(calc)  | Delta  | Miss | Sequence                                                               |
|-------------|----------|-----------|-----------|--------|------|------------------------------------------------------------------------|
| 152 - 161   | 566.3993 | 1130.7840 | 1130.5356 | 0.2484 | 0    | <b>K.NAPPDFQNTK.L</b> ( <a href="#">Ions score 30</a> )                |
| 247 - 263   | 781.9994 | 1561.9841 | 1561.7485 | 0.2357 | 0    | <b>R.GGSTGYDNAVALPAGGR.G</b> ( <a href="#">Ions score 53</a> )         |
| 276 - 287   | 602.4497 | 1202.8848 | 1202.6507 | 0.2342 | 0    | <b>K.NTAASVGEITLK.I</b> ( <a href="#">Ions score 53</a> )              |
| 291 - 315   | 868.8857 | 2603.6353 | 2603.2966 | 0.3387 | 0    | <b>K.SKPETGEVIGVFESLQPSDTDLGAK.V</b> ( <a href="#">Ions score 21</a> ) |

# gi|228403 Glycolate oxidase

## Protein View

Match to: gi|228403 Score: 117

glycolate oxidase

Found in search of C:\QStar Share Data\20091115MMZ\NOV17\1573NOV17.wiff

Nominal mass ( $M_r$ ): 40907; Calculated pI value: 9.38

NCBI BLAST search of [gi|228403](#) against nr

Unformatted [sequence string](#) for pasting into other applications

Taxonomy: [Lens culinaris](#)

Fixed modifications: Carbamidomethyl (C)

Variable modifications: Oxidation (M), Phospho (ST)

Cleavage by Trypsin: cuts C-term side of KR unless next residue is P

Sequence Coverage: 5%

Matched peptides shown in **Bold Red**

```
1 MEITNVSEYE NVAKQKLPKM VFDYYASGAE DQWTLQENRN AFSRILFRPR
51 ILIDVSKIDM TTTVLGFKIS MPIMIAPTAM QKMAHPEGEY ATARAASAAG
101 TIMTLSSWAT SSVEEVASTG PGIRFFQLYV YKDRNVVAQL VRRRAERAGFK
151 AIALTVDTPR LGRREADIKN RFVLPPFLSL KNFEGLDL GK MDQANDSGLA
201 SYVAGQIDRS LSWKDVKWLQ TITSLPILVK GVLTAEDARI AVQSGAAGII
251 VSNHGARQLD YVLATISALE EVVKAAQGRV PVFLDGGVRR GTDVFKALAL
301 GARGVFIGRP VVFLAAEGE VGVKKVLQML RDEFEMTMTL SGC RSLKEIT
351 REMIVADWDT PRIQPRALPR L
```

| Start - End | Observed | Mr (expt) | Mr (calc) | Delta  | Miss | Sequence              |                                   |
|-------------|----------|-----------|-----------|--------|------|-----------------------|-----------------------------------|
| 151 - 160   | 528.8606 | 1055.7066 | 1055.5975 | 0.1091 | 0    | <b>K.AIALTVDTPR.L</b> | ( <a href="#">Ions score 64</a> ) |
| 182 - 190   | 496.8187 | 991.6228  | 991.4975  | 0.1254 | 0    | <b>K.NFEGLDL GK.M</b> | ( <a href="#">Ions score 53</a> ) |

# gi|15228194 Sedoheptulose-bisphosphatase (SBPASE)

## Protein View

Match to: gi|15228194 Score: 251

SBPASE (SEDOHEPTULOSE-BISPHOSPHATASE); phosphoric ester hydrolase/ sedoheptulose-bisphosphatase [Arabidopsis thaliana]  
Found in search of C:\QStar Share Data\20091115MMZ\NOV16\1574NOV16.wiff

Nominal mass (M<sub>r</sub>): 42787; Calculated pI value: 6.17

NCBI BLAST search of [gi|15228194](#) against nr  
Unformatted [sequence string](#) for pasting into other applications

Taxonomy: [Arabidopsis thaliana](#)

Links to retrieve other entries containing this sequence from NCBI Entrez:

[gi|1173345](#) from [Arabidopsis thaliana](#)

[gi|786466](#) from [Arabidopsis thaliana](#)

[gi|7263568](#) from [Arabidopsis thaliana](#)

Fixed modifications: Carbamidomethyl (C)

Variable modifications: Oxidation (M), Phospho (ST)

Cleavage by Trypsin: cuts C-term side of KR unless next residue is P

Sequence Coverage: 15%

Matched peptides shown in **Bold Red**

```
1 METSIACYSR GILPPSVSSQ RSSTLVSPPS YSTSSSFKRL KSSSIFGDSL
51 RLAPKSQLKA TKAKSNGAST VTKCEIGQSL EEFLAQATPD KGLRTLMLCM
101 GEALRTIAFK VRTASCGGTA CVNSFGDEQL AVDMLADKLL FEALQYSHVC
151 KYACSEEVPE LQDMGGPVEG GFSVAFDPLD GSSIVDTNFT VGTIFGVWPG
201 DKLTGITGGD QVAAAMGIYG PRTTYVLAVK GFPGTHEFLL LDEGKWQHVK
251 ETTEIAEGKM FSPGNLRATF DNSEYSKLID YYVKEKYTLR YTGGMVPDVN
301 QIIVKEKGIF TNVTSPTAKA KLRLLEFVAP LGLLIENAGG FSSDGHKSVL
351 DKTIINLDDR TQVAYGSKNE IIRFEETLYG TSRLKNVPIG VTA
```

| Start - End | Observed | Mr(expt)  | Mr(calc)  | Delta  | Miss | Sequence                                                              |
|-------------|----------|-----------|-----------|--------|------|-----------------------------------------------------------------------|
| 223 - 230   | 447.8136 | 893.6127  | 893.5222  | 0.0905 | 0    | R. <b>TTYVLAVK</b> .G ( <a href="#">Ions score 40</a> )               |
| 260 - 267   | 469.2334 | 936.4522  | 936.4487  | 0.0035 | 0    | K. <b>MFSPGNLR</b> .A Oxidation (M) ( <a href="#">Ions score 27</a> ) |
| 278 - 284   | 457.2908 | 912.5671  | 912.4957  | 0.0715 | 0    | K.LIDYYVK.E ( <a href="#">Ions score 30</a> )                         |
| 291 - 305   | 550.6594 | 1648.9562 | 1648.8495 | 0.1068 | 0    | R.YTGGMVPDVNQIIVK.E Oxidation (M) ( <a href="#">Ions score 47</a> )   |
| 308 - 319   | 618.3640 | 1234.7135 | 1234.6558 | 0.0577 | 0    | K.GIFTNVTSP <b>TAK</b> .A ( <a href="#">Ions score 58</a> )           |
| 374 - 383   | 601.8144 | 1201.6142 | 1201.5615 | 0.0527 | 0    | R.FEETLYG <b>TSR</b> .L ( <a href="#">Ions score 48</a> )             |

# gi|114403 ATP synthase subunit alpha, mitochondrial

## Protein View

Match to: gi|114403 Score: 244

RecName: Full=ATP synthase subunit alpha, mitochondrial

Found in search of C:\QStar Share Data\20091115MMZ\NOV26\708NOV26.wiff

Nominal mass ( $M_r$ ): 55393; Calculated pI value: 6.23

NCBI BLAST search of [gi|114403](#) against nr

Unformatted [sequence string](#) for pasting into other applications

Taxonomy: [Brassica napus](#)

Fixed modifications: Carbamidomethyl (C)

Variable modifications: Deamidated (NQ), Gln->pyro-Glu (N-term Q), Oxidation (M)

Cleavage by Trypsin: cuts C-term side of KR unless next residue is P

Sequence Coverage: 8%

Matched peptides shown in **Bold Red**

```
1  MELSPRAAEL TNLFESRIRN FYANFQVDEI GRVVSVDGI AQVYGLNEIQ
51  AGEMVLFANG VKGMALNLEN ENVGIVVFGG DTAIKEGDLV KRTGSIVDVP
101 AGKAMLGRVV DAMGVPIDGR GALSDHEQRR VEVKAPGILE RKSVEHPMQT
151 GLKAVDSLVP IGRGQRELLI GDRQTGKTTI AIDTILNQKQ INSRATSESE
201 TMYCVYVAIG QKRSTVGQLI QTLEEANALE YSILVAATAS DPAPLQFLAP
251 YSGCAMGEYF RDNGMHALII YDDLKQAVA YRQMSLLRR PPGREAFPGD
301 VFYLHSRLLE RAAKRSQDTG AGSLTALPVI ETQAGDVSAY IPTNVISITD
351 GQICLETELF YRGIRPAINV GLSVSRVGS AQLKAMKQVC GSSKLELAQY
401 REVAFAQFG SDDLAATQAL LNRGARLTEV PKQPQYAPLP IEKQILVIYA
451 AVNGFCDRMP LDRISQYEKA IPNSVKPELL QALKGGLTNE RKMEPDAFLK
501 ERALRLI
```

| Start - End | Observed | Mr(expt)  | Mr(calc)  | Delta  | Miss | Sequence                                                                          |
|-------------|----------|-----------|-----------|--------|------|-----------------------------------------------------------------------------------|
| 7 - 17      | 625.8907 | 1249.7669 | 1249.6302 | 0.1367 | 0    | <b>R.AAELTNLFESR.I</b> ( <a href="#">Ions score 77</a> )                          |
| 109 - 120   | 614.8944 | 1227.7743 | 1227.6282 | 0.1461 | 0    | <b>R.VVDAMGVPIDGR.G</b> ( <a href="#">Ions score 36</a> )                         |
| 109 - 120   | 622.8902 | 1243.7658 | 1243.6231 | 0.1427 | 0    | <b>R.VVDAMGVPIDGR.G</b> Oxidation (M) ( <a href="#">Ions score 62</a> )           |
| 154 - 163   | 513.8775 | 1025.7405 | 1025.5869 | 0.1536 | 0    | <b>K.AVDSLVPPIGR.G</b> ( <a href="#">Ions score 55</a> )                          |
| 433 - 443   | 633.9125 | 1265.8104 | 1265.6656 | 0.1448 | 0    | <b>K.QPQYAPLPIEK.Q</b> Gln->pyro-Glu (N-term Q) ( <a href="#">Ions score 51</a> ) |
| 433 - 443   | 642.4151 | 1282.8157 | 1282.6921 | 0.1236 | 0    | <b>K.QPQYAPLPIEK.Q</b> ( <a href="#">Ions score 32</a> )                          |

# gi|75336517 ATP synthase subunit beta, chloroplastic

## Protein View

Match to: gi|75336517 Score: 1158

RecName: Full=ATP synthase subunit beta, chloroplastic; AltName: Full=F-ATPase subunit beta  
Found in search of C:\QStar Share Data\20091115MMZ\NOV26\1028NOV26.wiff

Nominal mass ( $M_r$ ): 53740; Calculated pI value: 5.21

NCBI BLAST search of [gi|75336517](#) against nr  
Unformatted [sequence string](#) for pasting into other applications

Taxonomy: [Brassica napus](#)

Fixed modifications: Carbamidomethyl (C)

Variable modifications: Deamidated (NQ),Gln->pyro-Glu (N-term Q),Oxidation (M)

Cleavage by Trypsin: cuts C-term side of KR unless next residue is P

Sequence Coverage: 45%

Matched peptides shown in **Bold Red**

```
1 MRINPTTSDP AVSIREKNNL GRIAQIIGPV LDVAFPPGKM PNIYNALVVK
51 GRDTLGQEIN VTCEVQQLLG NNRVRAVAMS ATEGLKRGMD VVDMGNPLSV
101 PVGGATLGRI FNVLGEPVNN LGPVDTLTTS PIHKSAPAFI DLDTTLSIFE
151 TGIKVVDLLA PYRRGGKIGL FGGAGVGKTV LIMELINNIA KAHGGVSVFG
201 GVGERTREGN DLYMEMKESG VINELNLADS KVALVYGQMN EPPGARMRVG
251 LTALTMAEYF RDVNEQDVLL FIDNIFRFVQ AGSEVSALLG RMPSAVGYQP
301 TLSAEMGSLQ ERITSTKKG S ITSIQAVYVP ADDLTD PAPA TTF AHLDATT
351 VLSRGLAAKG IYPAVDPLDS TSTMLQPRIV GEEHYETAQQ VKQTLQRYKE
401 LQDIIAILGL DELSEEDRLT VARARKIERF LSQPF FVAEV FTGSPGKYVG
451 LAETIRGFNL ILSGEFDSL P EQAFYLVGNI DEATAKATNL EMESKLKK
```

| Start - End | Observed | Mr (expt) | Mr (calc) | Delta  | Miss | Sequence                                                                          |
|-------------|----------|-----------|-----------|--------|------|-----------------------------------------------------------------------------------|
| 3 - 15      | 685.9302 | 1369.8459 | 1369.7201 | 0.1258 | 0    | R.INPTTSDPAVSIR.E ( <a href="#">Ions score 60</a> )                               |
| 40 - 50     | 631.4198 | 1260.8251 | 1260.6900 | 0.1351 | 0    | K.MPNIYNALVVK.G ( <a href="#">Ions score 54</a> )                                 |
| 40 - 50     | 639.4316 | 1276.8487 | 1276.6849 | 0.1638 | 0    | K.MPNIYNALVVK.G Oxidation (M) ( <a href="#">Ions score 70</a> )                   |
| 76 - 86     | 539.3524 | 1076.6903 | 1076.5536 | 0.1367 | 0    | R.AVAMSATEGLK.R ( <a href="#">Ions score 83</a> )                                 |
| 76 - 86     | 547.3542 | 1092.6938 | 1092.5485 | 0.1453 | 0    | R.AVAMSATEGLK.R Oxidation (M) ( <a href="#">Ions score 38</a> )                   |
| 76 - 86     | 547.3542 | 1092.6938 | 1092.5485 | 0.1453 | 0    | R.AVAMSATEGLK.R Oxidation (M) ( <a href="#">Ions score 61</a> )                   |
| 76 - 86     | 547.3542 | 1092.6938 | 1092.5485 | 0.1453 | 0    | R.AVAMSATEGLK.R Oxidation (M) ( <a href="#">Ions score 46</a> )                   |
| 76 - 86     | 547.3542 | 1092.6938 | 1092.5485 | 0.1453 | 0    | R.AVAMSATEGLK.R Oxidation (M) ( <a href="#">Ions score 64</a> )                   |
| 87 - 109    | 777.4621 | 2329.3644 | 2329.1519 | 0.2125 | 1    | K.RGMDVVDMGNPLSVPVGGATLGR.I 2 Oxidation (M) ( <a href="#">Ions score 63</a> )     |
| 88 - 109    | 720.0981 | 2157.2725 | 2157.0559 | 0.2166 | 0    | R.GMDVVDMGNPLSVPVGGATLGR.I Oxidation (M) ( <a href="#">Ions score 51</a> )        |
| 88 - 109    | 725.4145 | 2173.2218 | 2173.0508 | 0.1710 | 0    | R.GMDVVDMGNPLSVPVGGATLGR.I 2 Oxidation (M) ( <a href="#">Ions score 61</a> )      |
| 110 - 134   | 892.8789 | 2675.6150 | 2675.4170 | 0.1979 | 0    | R.IFNVLGEPVNNLGPVDTLTTSPIHK.S Deamidated (NQ) ( <a href="#">Ions score 82</a> )   |
| 155 - 163   | 523.3724 | 1044.7303 | 1044.5968 | 0.1336 | 0    | K.VVDLLAPYR.R ( <a href="#">Ions score 44</a> )                                   |
| 168 - 178   | 488.3479 | 974.6813  | 974.5549  | 0.1263 | 0    | K.IGLFGGAGVGK.T ( <a href="#">Ions score 56</a> )                                 |
| 179 - 191   | 744.9739 | 1487.9332 | 1487.8269 | 0.1063 | 0    | K.TVLIMELINNIK.A Deamidated (NQ); Oxidation (M) ( <a href="#">Ions score 39</a> ) |
| 192 - 205   | 664.9092 | 1327.8039 | 1327.6633 | 0.1406 | 0    | K.AHGGVSVFGGVGER.T ( <a href="#">Ions score 65</a> )                              |
| 208 - 217   | 615.3373 | 1228.6600 | 1228.5104 | 0.1496 | 0    | R.EGNDLYMEMK.E ( <a href="#">Ions score 50</a> )                                  |
| 208 - 217   | 623.3247 | 1244.6349 | 1244.5053 | 0.1296 | 0    | R.EGNDLYMEMK.E Oxidation (M) ( <a href="#">Ions score 44</a> )                    |
| 208 - 217   | 631.3301 | 1260.6456 | 1260.5002 | 0.1454 | 0    | R.EGNDLYMEMK.E 2 Oxidation (M) ( <a href="#">Ions score 27</a> )                  |
| 218 - 231   | 744.9251 | 1487.8357 | 1487.7467 | 0.0890 | 0    | K.ESGVINELNLADSK.V ( <a href="#">Ions score 73</a> )                              |
| 232 - 246   | 801.4679 | 1600.9213 | 1600.8031 | 0.1182 | 0    | K.VALVYGQMNPPGAR.M ( <a href="#">Ions score 104</a> )                             |
| 232 - 246   | 809.4494 | 1616.8842 | 1616.7981 | 0.0862 | 0    | K.VALVYGQMNPPGAR.M Oxidation (M) ( <a href="#">Ions score 84</a> )                |
| 249 - 261   | 744.4500 | 1486.8855 | 1486.7490 | 0.1365 | 0    | R.VGLTALTMAEYFR.D Oxidation (M) ( <a href="#">Ions score 80</a> )                 |
| 278 - 291   | 717.4532 | 1432.8918 | 1432.7674 | 0.1244 | 0    | R.FVQAGSEVSALLGR.M ( <a href="#">Ions score 68</a> )                              |
| 360 - 378   | 687.7553 | 2060.2440 | 2060.0248 | 0.2192 | 0    | K.GIYPAVDPLDSTSTMLQPR.I ( <a href="#">Ions score 98</a> )                         |
| 360 - 378   | 693.0804 | 2076.2195 | 2076.0198 | 0.1997 | 0    | K.GIYPAVDPLDSTSTMLQPR.I Oxidation (M) ( <a href="#">Ions score 88</a> )           |
| 379 - 392   | 815.9650 | 1629.9155 | 1629.7998 | 0.1157 | 0    | R.IVGEEHYETAQQVK.Q ( <a href="#">Ions score 67</a> )                              |
| 379 - 392   | 544.3609 | 1630.0609 | 1629.7998 | 0.2611 | 0    | R.IVGEEHYETAQQVK.Q ( <a href="#">Ions score 48</a> )                              |

# gi|558479 Tonoplast ATPase 70 kDa subunit

## Protein View

Match to: gi|558479 Score: 545

tonoplast ATPase 70 kDa subunit

Found in search of C:\QStar Share Data\20091115MMZ\NOV26\555NOV26.wiff

Nominal mass ( $M_r$ ): 69030; Calculated pI value: 5.19

NCBI BLAST search of [gi|558479](#) against nr

Unformatted [sequence string](#) for pasting into other applications

Taxonomy: [Brassica napus](#)

Fixed modifications: Carbamidomethyl (C)

Variable modifications: Deamidated (NQ), Gln->pyro-Glu (N-term Q), Oxidation (M)

Cleavage by Trypsin: cuts C-term side of KR unless next residue is P

Sequence Coverage: 18%

Matched peptides shown in **Bold Red**

```
1  MPAFYGGKLT  TFEDDEKESE  YGYVRKVSGP  VVVADGMAGA  AMYELVRVGH
51  DNLIGEIIRL  EGDSATIQVY  EETAGLTVND  PVLRTHKPLS  VELGPGILGN
101 IFDGIQRPLK  TIAKRSGDVY  IPRGVSVPAL  DKDCLWEFQP  KDFVEGDTIT
151 GGDLYATVFE  NSLMQHHVAL  PPDAMGKITY  LAPAGQYSLK  DTVLELEFQG
201 VKKSFTMLQT  WPVRTPRPVA  SKLAADTPLL  TGQRVLDALF  PSVLGGTCAI
251 PGAFGCGKTV  ISQALSKYSN  SDAVVYVCGG  ERGNEMAEVL  MDFPQLTMTL
301 PDGREESVMK  RTTLVANTSN  MPVAAREASI  YTGITIAEYF  RDMGYNVSMM
351 ADSTSRWAEA  LREISGRLAE  MPADSGYPAY  LAARLASFYE  RAGKVKCLGG
401 PERNGSVTIV  GAVSPPGGDF  SDPVTSATLS  IVQVFWGLDK  KLAQRKHFPS
451 VNWLISYSKY  STALESFYEK  FDSDFIDIRT  KAREVLQRED  DLNEIVQLVG
501 KDALAEGDKI  TLETAKLLRE  DYLAQNAFTP  YDKFCPFYKS  VWMMRNIHF
551 YNLANQAVER  GAGMDGQKIS  YSLIKHRLGD  LFYRLVSQKF  EDPAEGEDVL
601 VGKFKKLHDD  LTSGFRNLED  ETR
```



| Start - End | Observed | Mr (expt) | Mr (calc) | Delta  | Miss | Sequence                                                              |
|-------------|----------|-----------|-----------|--------|------|-----------------------------------------------------------------------|
| 9 - 25      | 694.3973 | 2080.1700 | 2079.9273 | 0.2427 | 1    | K.LTTFEDDEKESYGYVR.K ( <a href="#">Ions score 59</a> )                |
| 178 - 190   | 712.9645 | 1423.9144 | 1423.7711 | 0.1433 | 0    | K.ITYLAPAGQYSLK.D ( <a href="#">Ions score 47</a> )                   |
| 223 - 234   | 628.4396 | 1254.8646 | 1254.6932 | 0.1714 | 0    | K.LAADTPLLTGQR.V ( <a href="#">Ions score 72</a> )                    |
| 312 - 326   | 773.4842 | 1544.9538 | 1544.7981 | 0.1557 | 0    | R.TTLVANTSNMPVAAR.E ( <a href="#">Ions score 74</a> )                 |
| 312 - 326   | 773.4842 | 1544.9538 | 1544.7981 | 0.1557 | 0    | R.TTLVANTSNMPVAAR.E ( <a href="#">Ions score 67</a> )                 |
| 312 - 326   | 781.4751 | 1560.9357 | 1560.7930 | 0.1428 | 0    | R.TTLVANTSNMPVAAR.E Oxidation (M) ( <a href="#">Ions score 74</a> )   |
| 342 - 356   | 840.9161 | 1679.8176 | 1679.6589 | 0.1587 | 0    | R.DMGYNVSMADSTSR.W Oxidation (M) ( <a href="#">Ions score 59</a> )    |
| 342 - 356   | 848.8960 | 1695.7775 | 1695.6539 | 0.1236 | 0    | R.DMGYNVSMADSTSR.W 2 Oxidation (M) ( <a href="#">Ions score 38</a> )  |
| 342 - 356   | 848.9090 | 1695.8035 | 1695.6539 | 0.1496 | 0    | R.DMGYNVSMADSTSR.W 2 Oxidation (M) ( <a href="#">Ions score 67</a> )  |
| 342 - 356   | 856.9136 | 1711.8127 | 1711.6488 | 0.1639 | 0    | R.DMGYNVSMADSTSR.W 3 Oxidation (M) ( <a href="#">Ions score 74</a> )  |
| 368 - 384   | 906.5095 | 1811.0044 | 1810.8559 | 0.1485 | 0    | R.LAEMPADSGYPAYLAAR.L Oxidation (M) ( <a href="#">Ions score 59</a> ) |
| 460 - 470   | 669.4060 | 1336.7974 | 1336.6187 | 0.1788 | 0    | K.YSTALESFYEK.F ( <a href="#">Ions score 57</a> )                     |
| 502 - 516   | 787.9902 | 1573.9659 | 1573.8199 | 0.1460 | 1    | K.DALAEGDKITLETAK.L ( <a href="#">Ions score 103</a> )                |

# gi|1655480 Gamma subunit of mitochondrial F1-ATPase

## Protein View

Match to: gi|1655480 Score: 83

gamma subunit of mitochondrial F1-ATPase [Arabidopsis thaliana]

Found in search of D:\Sixue Chen-don't delete please\20091115MMZ\DEC01\1908DEC01.wiff

Nominal mass ( $M_r$ ): 35597; Calculated pI value: 9.01

NCBI BLAST search of [gi|1655480](#) against nr

Unformatted [sequence string](#) for pasting into other applications

Taxonomy: [Arabidopsis thaliana](#)

Fixed modifications: Carbamidomethyl (C)

Variable modifications: Deamidated (NQ), Gln->pyro-Glu (N-term Q), Oxidation (M)

Cleavage by Trypsin: cuts C-term side of KR unless next residue is P

Sequence Coverage: 4%

Matched peptides shown in **Bold Red**

```
1 MAMAVFRREG RRLGPSIAAR PIAAIRSPLS SDQEEGLLGV RSISTQVVRN
51 RMKSVKNIQK ITKAMKMVAA SKLRAVQGRA ENSRGLWQPF TALLGDNPSI
101 DVKKSVVVTL SSDKGLCGGI NSTVVKVSRA LYKLNAGPEK EVQFVIVGEK
151 AKAIMFRDSK NDIVLSVTEL NKNPLNYAQV SVLADDILKN VEFDALRIVY
201 NKFHSVVAFL PTVSTVLSPE IIEKESEIGG KLGELDSYEI EGGETKGEIL
251 QNLAEFQFSC VMFNAVLENA CSEMGARMSA MDSSSRNAGE MLDRLTLTYN
301 RTRQASITTE LIEIISGASA LEAAK
```

| Start - End | Observed | Mr(expt)  | Mr(calc)  | Delta  | Miss | Sequence                   |                                   |
|-------------|----------|-----------|-----------|--------|------|----------------------------|-----------------------------------|
| 232 - 246   | 820.4725 | 1638.9304 | 1638.7624 | 0.1680 | 0    | <b>K.LGELDSYEIEGGETK.G</b> | ( <a href="#">Ions score 83</a> ) |

## Peptide View

MS/MS Fragmentation of **LGELDSYEIEGGETK**

Found in **gi|1655480**, gamma subunit of mitochondrial F1-ATPase [Arabidopsis thaliana]

| #  | b               | b <sup>++</sup> | b <sup>0</sup> | b <sup>0++</sup> | Seq. | y                | y <sup>++</sup> | y*        | y* <sup>++</sup> | y <sup>0</sup>  | y <sup>0++</sup> | #  |
|----|-----------------|-----------------|----------------|------------------|------|------------------|-----------------|-----------|------------------|-----------------|------------------|----|
| 1  | 114.0913        | 57.5493         |                |                  | L    |                  |                 |           |                  |                 |                  | 15 |
| 2  | <b>171.1128</b> | 86.0600         |                |                  | G    | 1526.6857        | 763.8465        | 1509.6591 | 755.3332         | 1508.6751       | 754.8412         | 14 |
| 3  | <b>300.1554</b> | 150.5813        | 282.1448       | 141.5761         | E    | 1469.6642        | 735.3357        | 1452.6377 | 726.8225         | 1451.6536       | 726.3305         | 13 |
| 4  | 413.2395        | 207.1234        | 395.2289       | 198.1181         | L    | 1340.6216        | 670.8144        | 1323.5951 | 662.3012         | 1322.6111       | 661.8092         | 12 |
| 5  | 528.2664        | 264.6368        | 510.2558       | 255.6316         | D    | <b>1227.5376</b> | 614.2724        | 1210.5110 | 605.7591         | 1209.5270       | 605.2671         | 11 |
| 6  | 615.2984        | 308.1529        | 597.2879       | 299.1476         | S    | <b>1112.5106</b> | 556.7589        | 1095.4841 | 548.2457         | 1094.5000       | 547.7537         | 10 |
| 7  | 778.3618        | 389.6845        | 760.3512       | 380.6792         | Y    | <b>1025.4786</b> | 513.2429        | 1008.4520 | 504.7297         | 1007.4680       | 504.2376         | 9  |
| 8  | 907.4044        | 454.2058        | 889.3938       | 445.2005         | E    | <b>862.4153</b>  | 431.7113        | 845.3887  | 423.1980         | <b>844.4047</b> | 422.7060         | 8  |
| 9  | 1020.4884       | 510.7478        | 1002.4779      | 501.7426         | I    | <b>733.3727</b>  | 367.1900        | 716.3461  | 358.6767         | 715.3621        | 358.1847         | 7  |
| 10 | 1149.5310       | 575.2691        | 1131.5204      | 566.2639         | E    | <b>620.2886</b>  | 310.6479        | 603.2620  | 302.1347         | 602.2780        | 301.6427         | 6  |
| 11 | 1206.5525       | 603.7799        | 1188.5419      | 594.7746         | G    | <b>491.2460</b>  | 246.1266        | 474.2195  | 237.6134         | 473.2354        | 237.1214         | 5  |
| 12 | 1263.5739       | 632.2906        | 1245.5634      | 623.2853         | G    | <b>434.2245</b>  | 217.6159        | 417.1980  | 209.1026         | 416.2140        | 208.6106         | 4  |
| 13 | 1392.6165       | 696.8119        | 1374.6060      | 687.8066         | E    | 377.2031         | 189.1052        | 360.1765  | 180.5919         | 359.1925        | 180.0999         | 3  |
| 14 | 1493.6642       | 747.3357        | 1475.6536      | 738.3305         | T    | <b>248.1605</b>  | 124.5839        | 231.1339  | 116.0706         | 230.1499        | 115.5786         | 2  |
| 15 |                 |                 |                |                  | K    | 147.1128         | 74.0600         | 130.0863  | 65.5468          |                 |                  | 1  |

# gi|166627 Nucleotide-binding subunit of vacuolar ATPase

## Protein View

Match to: gi|166627 Score: 725

nucleotide-binding subunit of vacuolar ATPase [Arabidopsis thaliana]

Found in search of C:\QStar Share Data\20091115MMZ\NOV16\842NOV16.wiff

Nominal mass ( $M_r$ ): 54819; Calculated pI value: 4.98

NCBI BLAST search of [gi|166627](#) against nr

Unformatted [sequence string](#) for pasting into other applications

Taxonomy: [Arabidopsis thaliana](#)

Fixed modifications: Carbamidomethyl (C)

Variable modifications: Oxidation (M), Phospho (ST)

Cleavage by Trypsin: cuts C-term side of KR unless next residue is P

Sequence Coverage: 23%

Matched peptides shown in **Bold Red**

```
1  MSLSVNMGTN  DLDIEEGTLE  IGMEYRTVSG  VAGPLVILDK  VKGPKYQEIV
51  NIRLGDGSTR  RGQVLEVDGE  KAVVQVFEGT  SGIDNKFTTV  QFTGEVLKTP
101 VSLDMLGRIF  NGSGKPIDNG  PPILPEAYLD  ISGSSINPSE  RTYPEEMIQT
151  GISTIDVMNS  IARGQKIPLF  SAAGLPHNEI  AAQICRQAGL  VKRLEKTVDL
201  LEDHGEDNFA  IVFAAMGVNM  ETAQFFKRDF  EENGSMERVT  LFLNLANDPT
251  IERIITPRIA  LTTAEYLAYE  CGKHVLVILT  DMSSYADALR  EVSAAREEVP
301  GRRGYPGYMY  TDLATYIERA  GRIEGRKGS  TQIPILTMPN  DDITHPTPDL
351  TGYITEGQIY  IDRQLHNRQI  YPPINVLPSL  SRLMKSARGE  GMTRKDHSDV
401  SNQLYANYAI  GKDVQAMKAV  VGEEALSSSE  LLYLEFLDKF  ERKFVMQAY
451  DTRNIFQSLD  LAWTLRLRIF  RELLHRIPAK  TLDQFYSRDS  TS
```

| Start - End | Observed | Mr (expt) | Mr (calc) | Delta  | Miss | Sequence                                                        |
|-------------|----------|-----------|-----------|--------|------|-----------------------------------------------------------------|
| 46 - 53     | 517.8113 | 1033.6081 | 1033.5556 | 0.0525 | 0    | K.YQEIVNIR.L ( <a href="#">Ions score 42</a> )                  |
| 61 - 71     | 615.3594 | 1228.7043 | 1228.6412 | 0.0631 | 1    | R.RGQVLEVDGEK.A ( <a href="#">Ions score 79</a> )               |
| 62 - 71     | 537.3120 | 1072.6095 | 1072.5401 | 0.0694 | 0    | R.GQVLEVDGEK.A ( <a href="#">Ions score 65</a> )                |
| 72 - 86     | 521.9743 | 1562.9010 | 1562.7941 | 0.1070 | 0    | K.AVVQVFEGTSGIDNK.F ( <a href="#">Ions score 59</a> )           |
| 87 - 98     | 685.3925 | 1368.7705 | 1368.7289 | 0.0416 | 0    | K.FTTVQFTGEVLK.T ( <a href="#">Ions score 63</a> )              |
| 99 - 108    | 544.8297 | 1087.6449 | 1087.5696 | 0.0753 | 0    | K.TPVSLDMLGR.I ( <a href="#">Ions score 79</a> )                |
| 229 - 238   | 607.2803 | 1212.5460 | 1212.4717 | 0.0743 | 0    | R.DFEENGSMER.V ( <a href="#">Ions score 65</a> )                |
| 369 - 382   | 798.9929 | 1595.9712 | 1595.9035 | 0.0677 | 0    | R.QIYPPINVLPSLSR.L ( <a href="#">Ions score 48</a> )            |
| 396 - 412   | 632.3287 | 1893.9643 | 1893.8857 | 0.0786 | 0    | K.DHSDVSNQLYANYAIGK.D ( <a href="#">Ions score 61</a> )         |
| 443 - 453   | 444.5888 | 1330.7445 | 1330.6340 | 0.1105 | 1    | R.KFVMQGAYDTR.N Oxidation (M) ( <a href="#">Ions score 59</a> ) |
| 444 - 453   | 602.3073 | 1202.6000 | 1202.5390 | 0.0609 | 0    | K.FVMQGAYDTR.N Oxidation (M) ( <a href="#">Ions score 55</a> )  |
| 481 - 488   | 515.2851 | 1028.5556 | 1028.4927 | 0.0629 | 0    | K.TLDQFYSR.D ( <a href="#">Ions score 52</a> )                  |

# gi|17939849 Mitochondrial F1 ATP synthase beta subunit

## Protein View

Match to: gi|17939849 Score: 694

mitochondrial F1 ATP synthase beta subunit [Arabidopsis thaliana]

Found in search of C:\QStar Share Data\20091115MMZ\NOV16\905NOV15.wiff

Nominal mass ( $M_r$ ): 63560; Calculated pI value: 6.52

NCBI BLAST search of [gi|17939849](#) against nr

Unformatted [sequence string](#) for pasting into other applications

Taxonomy: [Arabidopsis thaliana](#)

Fixed modifications: Carbamidomethyl (C)

Variable modifications: Oxidation (M), Phospho (ST)

Cleavage by Trypsin: cuts C-term side of KR unless next residue is P

Sequence Coverage: 26%

Matched peptides shown in **Bold Red**

```
1  MTMITPSSNT  THYRESWYAC  RYRSGIPGST  HASVASRRVL  SLLRSSSSGR
51  SAAKLGNRNP  RLPSPSPARH  AAPCSYLLGR  VAEYATSSPA  SSAAPSSAPA
101 KDEGKKTYDY  GGKGAIGRVC  QVIGAIVDVR  FEDQEGLPPI  MTSLEVQDHP
151  TRLVLEVSHH  LGQNVVRTIA  MDGTEGLVRG  RKVLNTGAPI  TVPVGRATLG
201  RIMNVLGEPI  DERGEIKTEH  YLPIHRDAPA  LVDLATGQEI  LATGIKVVDL
251  LAPYQRGGKI  GLFGGAGVGK  TVLIMELINN  VAKAHGGFSV  FAGVGERTRE
301  GNDLYREMIE  SGVIKLGEKQ  SESKCALVYG  QMNEPPGARA  RVGLTGLTVA
351  EYFRDAEQD  VLLFIDNIFR  FTQANSEVSA  LLGRIPSAVG  YQPTLASDLG
401  ALQERITTTK  KGSITSVQAI  YVPADDLTD  APATTFAHL  DATTVLSRQIS
451  ELGIYPAVDP  LDSTSRMLSP  HILGEEHYNT  ARGVQKVLQN  YKNLQDIIAI
501  LGMDELSEDD  KLTVARARKI  QRFLSQPFHV  AEIFTGAPGK  YVDLKENINS
551  FQGLLDGKYD  DLSEQSFYMV  GGIDEVVAKA  EKIAKESAA
```

| Start - End | Observed | Mr (expt) | Mr (calc) | Delta  | Miss | Sequence                                                         |
|-------------|----------|-----------|-----------|--------|------|------------------------------------------------------------------|
| 168 - 179   | 631.8573 | 1261.7001 | 1261.6336 | 0.0665 | 0    | R.TIAMDGTEGLVR.G ( <a href="#">Ions score 51</a> )               |
| 168 - 179   | 639.8494 | 1277.6842 | 1277.6286 | 0.0556 | 0    | R.TIAMDGTEGLVR.G Oxidation (M) ( <a href="#">Ions score 73</a> ) |
| 183 - 196   | 697.4355 | 1392.8565 | 1392.8089 | 0.0475 | 0    | K.VLNTGAPITVPVGR.A ( <a href="#">Ions score 69</a> )             |
| 202 - 213   | 693.3860 | 1384.7575 | 1384.7020 | 0.0555 | 0    | R.IMNVLGEPIDER.G ( <a href="#">Ions score 46</a> )               |
| 202 - 213   | 701.3786 | 1400.7426 | 1400.6969 | 0.0456 | 0    | R.IMNVLGEPIDER.G Oxidation (M) ( <a href="#">Ions score 63</a> ) |
| 227 - 246   | 666.0608 | 1995.1606 | 1995.0888 | 0.0718 | 0    | R.DAPALVDLATGQEILATGIK.V ( <a href="#">Ions score 73</a> )       |
| 247 - 256   | 587.3593 | 1172.7041 | 1172.6553 | 0.0488 | 0    | K.VVDLLAPYQR.G ( <a href="#">Ions score 53</a> )                 |
| 260 - 270   | 488.3183 | 974.6221  | 974.5549  | 0.0671 | 0    | K.IGLFGGAGVGK.T ( <a href="#">Ions score 48</a> )                |
| 307 - 315   | 503.3072 | 1004.5998 | 1004.5212 | 0.0786 | 0    | R.EMIESGVIK.L ( <a href="#">Ions score 32</a> )                  |
| 307 - 315   | 511.3004 | 1020.5862 | 1020.5161 | 0.0700 | 0    | R.EMIESGVIK.L Oxidation (M) ( <a href="#">Ions score 37</a> )    |
| 371 - 384   | 498.3023 | 1491.8851 | 1491.7681 | 0.1170 | 0    | R.FTQANSEVSALLGR.I ( <a href="#">Ions score 86</a> )             |
| 385 - 405   | 729.4237 | 2185.2494 | 2185.1379 | 0.1115 | 0    | R.IPSAVGYQPTLASDLGALQER.I ( <a href="#">Ions score 85</a> )      |
| 448 - 466   | 687.7084 | 2060.1035 | 2060.0426 | 0.0609 | 0    | R.QISELGIYPAVDPLDSTSR.M ( <a href="#">Ions score 56</a> )        |
| 546 - 558   | 717.8957 | 1433.7768 | 1433.7150 | 0.0618 | 0    | K.ENINSFQGLLDGK.Y ( <a href="#">Ions score 50</a> )              |

# gi|18391442 De-etiolated 3 (DET3)

## Protein View

Match to: gi|18391442 Score: 195

DET3 (DE-ETIOLATED 3) [Arabidopsis thaliana]

Found in search of C:\QStar Share Data\20091115MMZ\NOV17\1354NOV17.wiff

Nominal mass ( $M_r$ ): 42878; Calculated pI value: 5.40

NCBI BLAST search of [gi|18391442](#) against nr

Unformatted [sequence string](#) for pasting into other applications

Taxonomy: [Arabidopsis thaliana](#)

Links to retrieve other entries containing this sequence from NCBI Entrez:

[gi|12585488](#) from [Arabidopsis thaliana](#)

[gi|6636332](#) from [Arabidopsis thaliana](#)

[gi|8698731](#) from [Arabidopsis thaliana](#)

[gi|12248023](#) from [Arabidopsis thaliana](#)

[gi|16649005](#) from [Arabidopsis thaliana](#)

[gi|20259972](#) from [Arabidopsis thaliana](#)

[gi|225897918](#) from [Arabidopsis thaliana](#)

Fixed modifications: Carbamidomethyl (C)

Variable modifications: Oxidation (M), Phospho (ST)

Cleavage by Trypsin: cuts C-term side of KR unless next residue is P

Sequence Coverage: 10%

Matched peptides shown in **Bold Red**

```
1 MTSRYWVVSL PVKDSASSLW NRLQEQISKH SFDTPVYRFN IPNLRVGTLD
51 SLLALGDDLL KSNSFVEGVSK QKIRRQIEEL ERISGVESNA LTVDGVPVDS
101 YLTRFVWDEAK KYPTMSPLKE VVDNIQSQVA KIEDDLKVRV AEYNNIRGQL
151 NAINRKQSGS LAVRDLSNLV KPEDIVESEH LVTLLAVVVK YSQKDWLACY
201 ETLTDYVVPR SSKKLFEDNE YALYTVTLFT RVADNFRIAA REKGFQVRDF
251 EQSVEAQETR KQELAKLVQD QESLRSSLLQ WCYTSYGEVF SSWMHFCAVR
301 TFAESIMRYG LPPAFLACVL SPAVKSEKKV RSILERLCDS TNSLYWKSEE
351 DAGAMAGLAG DSETHPYVSF TINLA
```

| Start - End | Observed | Mr(expt)  | Mr(calc)  | Delta  | Miss | Sequence                                                             |
|-------------|----------|-----------|-----------|--------|------|----------------------------------------------------------------------|
| 62 - 72     | 591.3256 | 1180.6367 | 1180.5724 | 0.0643 | 0    | <b>K.SNSFVEGVSK</b> .I ( <a href="#">Ions score 49</a> )             |
| 105 - 111   | 447.7664 | 893.5183  | 893.4283  | 0.0900 | 0    | <b>R.FVWDEAK</b> .Y ( <a href="#">Ions score 25</a> )                |
| 112 - 119   | 476.7866 | 951.5587  | 951.4735  | 0.0851 | 0    | <b>K.YPTMSPLK</b> .E Oxidation (M) ( <a href="#">Ions score 51</a> ) |
| 120 - 131   | 665.3813 | 1328.7480 | 1328.6936 | 0.0544 | 0    | <b>K.EVVDNIQSQVAK</b> .I ( <a href="#">Ions score 72</a> )           |



# gi|120675 Glyceraldehyde-3-phosphate dehydrogenase, cytosolic

## Protein View

Match to: gi|120675 Score: 360

RecName: Full=Glyceraldehyde-3-phosphate dehydrogenase, cytosolic

Found in search of C:\QStar Share Data\20091115MMZ\NOV17\1573NOV17.wiff

Nominal mass ( $M_r$ ): 37015; Calculated pI value: 7.70

NCBI BLAST search of [gi|120675](#) against nr

Unformatted [sequence string](#) for pasting into other applications

Taxonomy: [Sinapis alba](#)

Links to retrieve other entries containing this sequence from NCBI Entrez:

[gi|21143](#) from [Sinapis alba](#)

Fixed modifications: Carbamidomethyl (C)

Variable modifications: Oxidation (M), Phospho (ST)

Cleavage by Trypsin: cuts C-term side of KR unless next residue is P

Sequence Coverage: 22%

Matched peptides shown in **Bold Red**

```
1  MADKKIKIGI NGFGRIGRLV  ARVILQRNDV  ELVAVNDPFI  TTEYMTYMFK
51  YDSVHGQWKH  NELKVKDEKT  LLFGEKPVTV  FGIRNPEDIP  WGEAGADFVV
101 ESTGVFTDKD  KAAAHLKGGA  KKVVISAPSK  DAPMFVGVN EHEYKSDLNI
151 VSNASCTTNC  LAPLAKVIND  RFGIVEGLMT  TVHSITATQK  TVDGPMSKDW
201 RGGRAASFNI IPSSTGAAKA  VGKVLPLNG  KLTGMSFRV  TVDVSVDLT
251 VRLEKAATYD  EIKKAIKEES  QGKLGILGY TEDDVVSTDF  VGDNRSSIFD
301 AKAGIALSDN FVKLVSWYDN  EWGYSTRVVD  LIIHMSKA
```

Show predicted peptides also

Sort Peptides By

Residue Number  Increasing Mass  Decreasing Mass

| Start - End | Observed | Mr(expt)  | Mr(calc)  | Delta  | Miss | Sequence                                                                  |
|-------------|----------|-----------|-----------|--------|------|---------------------------------------------------------------------------|
| 8 - 15      | 417.2922 | 832.5699  | 832.4555  | 0.1143 | 0    | <b>K.IGINGFGR.I</b> ( <a href="#">Ions score 48</a> )                     |
| 131 - 145   | 579.0048 | 1733.9926 | 1733.8083 | 0.1843 | 0    | <b>K.DAPMFVGVNEHEYK.S</b> ( <a href="#">Ions score 55</a> )               |
| 131 - 145   | 584.3340 | 1749.9802 | 1749.8032 | 0.1770 | 0    | <b>K.DAPMFVGVNEHEYK.S</b> Oxidation (M) ( <a href="#">Ions score 49</a> ) |
| 205 - 219   | 717.9316 | 1433.8486 | 1433.7514 | 0.0971 | 0    | <b>R.AASFNIIPSSTGA.A</b> ( <a href="#">Ions score 57</a> )                |
| 232 - 238   | 406.2593 | 810.5041  | 810.4058  | 0.0983 | 0    | <b>K.LTGMSFR.V</b> ( <a href="#">Ions score 44</a> )                      |
| 276 - 295   | 724.7294 | 2171.1663 | 2171.0019 | 0.1644 | 0    | <b>K.GILGYTEDDVVSTDFVGDNR.S</b> ( <a href="#">Ions score 84</a> )         |
| 303 - 313   | 567.8663 | 1133.7181 | 1133.6081 | 0.1100 | 0    | <b>K.AGIALSDNFVK.L</b> ( <a href="#">Ions score 71</a> )                  |

# gi|166702 Glyceraldehyde 3-phosphate dehydrogenase A subunit

## Protein View

Match to: gi|166702 Score: 99

glyceraldehyde 3-phosphate dehydrogenase A subunit [Arabidopsis thaliana]

Found in search of C:\QStar Share Data\20091115MMZ\NOV15\1619NOV15.wiff

Nominal mass (M<sub>r</sub>): 37937; Calculated pI value: 7.00

NCBI BLAST search of [gi|166702](#) against nr

Unformatted [sequence string](#) for pasting into other applications

Taxonomy: [Arabidopsis thaliana](#)

Fixed modifications: Carbamidomethyl (C)

Variable modifications: Oxidation (M), Phospho (ST)

Cleavage by Trypsin: cuts C-term side of KR unless next residue is P

Sequence Coverage: 7%

Matched peptides shown in **Bold Red**

```
1 MGSSGGYRKG VTEAKLKVAI NGFGRIGRNF LRCWHGRKDS PLDIIAINDT
51 GGVKQASHLL KYDSTLGIFD ADVKPSGETA ISVDGKIIQV VSNRNPSLLP
101 WKELGIDIVI EGTGVFVDRE GAGKHMEAGA KKVIIITAPGK GDIPTYVVGV
151 NADAYSHDEP IISNASCTTN CLAPFVKVLD QKFGIIKGTM TTTHSYTGDQ
201 RLLDASHRDL RRARAALNI VPTSTGAAKA VALVLPNLKG KLNGIALRVP
251 TPNVSVVDLV VQVSKKTFAE EVNAAFRDSA EKELKGILDV CDEPLVSVDF
301 RCSDFSTTID SSLTMVMGDD MVKVIAYWYDN EWGYSQRVVD LADIVANNWK
351
```

Show predicted peptides also

Sort Peptides By

Residue Number  Increasing Mass  Decreasing Mass

| Start - End | Observed | Mr(expt)  | Mr(calc)  | Delta  | Miss | Sequence                                                     |
|-------------|----------|-----------|-----------|--------|------|--------------------------------------------------------------|
| 215 - 229   | 692.9277 | 1383.8408 | 1383.7722 | 0.0686 | 0    | <b>R.AAALNIVPTSTGAAK.A</b> ( <a href="#">Ions score 48</a> ) |
| 230 - 239   | 519.3768 | 1036.7391 | 1036.6644 | 0.0747 | 0    | <b>K.AVALVLPNLK.G</b> ( <a href="#">Ions score 52</a> )      |

# gi|336390 Glyceraldehyde 3-phosphate dehydrogenase B subunit

## Protein View

Match to: gi|336390 Score: 201  
glyceraldehyde 3-phosphate dehydrogenase B subunit [Arabidopsis thaliana]  
Found in search of C:\QStar Share Data\20091115MMZ\NOV17\1189NOV17.wiff

Nominal mass ( $M_r$ ): 43168; Calculated pI value: 5.60

NCBI BLAST search of [gi|336390](#) against nr  
Unformatted [sequence string](#) for pasting into other applications

Taxonomy: [Arabidopsis thaliana](#)

Fixed modifications: Carbamidomethyl (C)

Variable modifications: Oxidation (M), Phospho (ST)

Cleavage by Trypsin: cuts C-term side of KR unless next residue is P

Sequence Coverage: 11%

Matched peptides shown in **Bold Red**

```
1  MSSIGGEASF  FDAVAAQIIP  KAVTTSTPVR  GETVAKLKVA  INGFRIGRN
51  FLRCWHGRKD  SPLEVVVLDN  SGGVKNASHL  LKYDSMLGTF  KAEVKIVDNE
101 TISVDGLIK  VVSNRDPLKL  PWAELGIDIV  IEGTGVFVDG  PGAGKHIQAG
151 ASKVIIITAPA  KGADIPTYVM  GVNEQDYGHD  VANIISNASC  TTNCLAPFAK
201 VLDEEFGIVK  GTMTTTHSYT  GDQRLLDASH  RDLRRARAAA  LNIVPTSTGA
251 AKAVSLVLPQ  LKGKLNIAL  RVPTPNVSVV  DLVINVEKKG  LTAEDVNEAF
301 RKAANGPMKG  ILDVCDAPLV  SVDVFRCSVVS  TTIDSSLTMV  MGDDMVKVVA
351 WYDNEWGYSQ  RVVDLAHLVA  SKWPGAEAVG  SGDPLEDFCK  TNPADDECKV
401 YD
```

Show predicted peptides also

Sort Peptides By

Residue Number  Increasing Mass  Decreasing Mass

| Start - End | Observed | Mr(expt)  | Mr(calc)  | Delta  | Miss | Sequence                                                             |
|-------------|----------|-----------|-----------|--------|------|----------------------------------------------------------------------|
| 83 - 91     | 539.3006 | 1076.5866 | 1076.4848 | 0.1017 | 0    | <b>K.YDSMLGTFK.A</b> Oxidation (M) ( <a href="#">Ions score 44</a> ) |
| 96 - 107    | 645.3602 | 1288.7059 | 1288.6511 | 0.0549 | 0    | <b>K.IVDNETISVDGK.L</b> ( <a href="#">Ions score 89</a> )            |
| 201 - 210   | 574.8553 | 1147.6961 | 1147.6125 | 0.0836 | 0    | <b>K.VLDEEFGIVK.G</b> ( <a href="#">Ions score 27</a> )              |
| 238 - 252   | 692.9159 | 1383.8173 | 1383.7722 | 0.0451 | 0    | <b>R.AAALNIVPTSTGAAK.A</b> ( <a href="#">Ions score 41</a> )         |

# gi|15219412 Phosphoglycerate kinase (PGK)

Match to: gi|15219412 Score: 129

PGK (PHOSPHOGLYCERATE KINASE) [Arabidopsis thaliana]

Found in search of C:\QStar Share Data\20091115MMZ\NOV17\1482NOV17.wiff

Nominal mass ( $M_r$ ): 42162; Calculated pI value: 5.49

NCBI BLAST search of [gi|15219412](#) against nr

Unformatted [sequence string](#) for pasting into other applications

Taxonomy: [Arabidopsis thaliana](#)

Links to retrieve other entries containing this sequence from NCBI Entrez:

[gi|30699430](#) from [Arabidopsis thaliana](#)

[gi|4835754](#) from [Arabidopsis thaliana](#)

[gi|7839393](#) from [Arabidopsis thaliana](#)

[gi|13194782](#) from [Arabidopsis thaliana](#)

[gi|17065574](#) from [Arabidopsis thaliana](#)

[gi|30725646](#) from [Arabidopsis thaliana](#)

Fixed modifications: Carbamidomethyl (C)

Variable modifications: Oxidation (M), Phospho (ST)

Cleavage by Trypsin: cuts C-term side of KR unless next residue is P

Sequence Coverage: 7%

Matched peptides shown in **Bold Red**

```
1 MATKRSVGTL KEADLKGSV FVRVDLNVPL DDNSNITDDT RIRAAVPTIK
51 YLMGNRSRVV LCSHLGRPKG VTPKYSLKPL VPRLSSELLGV EVVMANDSIG
101 EEVQKLVAGL PEGGVLLLEN VRFYAEEEN DPEFAKKLAA LADVYVNDFAF
151 GTAHRAHAST EGVAKFLKPS VAGFLMQKEL DYLVGAVANP KKPFAAIVGG
201 SKVSTKIGVI ESLNTVDIL LLGGGMIFTF YKAQGLSVGS SLVEEDKLDL
251 AKSLMEKAKA KGVSLLLPTD VVIADKFAPD ANSKIVPATA IPDGWMGLDI
301 GPDSIKTFSE ALDTTKTIIW NGPMGVFEFD KFAAGTEAVA KQLAELSGKG
351 VTTIIGGDS VAAVEKVGLA DKMSHISTGG GASLELLEGGK PLPGVLALDE
401 A
```

Show predicted peptides also

Sort Peptides By

Residue Number  Increasing Mass  Decreasing Mass

| Start - End | Observed | Mr (expt) | Mr (calc) | Delta  | Miss | Sequence                                                      |
|-------------|----------|-----------|-----------|--------|------|---------------------------------------------------------------|
| 179 - 191   | 694.9150 | 1387.8154 | 1387.7347 | 0.0807 | 0    | <b>K.ELDYLVGAVANPK.K</b> ( <a href="#">Ions score 65</a> )    |
| 350 - 366   | 787.4640 | 1572.9135 | 1572.8359 | 0.0775 | 0    | <b>K.GVTTIIGGDSVAAVEK.V</b> ( <a href="#">Ions score 63</a> ) |

# gi|15230595 Phosphoglycerate kinase 1 (PGK1)

## Protein View

Match to: gi|15230595 Score: 282

PGK1 (PHOSPHOGLYCERATE KINASE 1); phosphoglycerate kinase [Arabidopsis thaliana]

Found in search of C:\QStar Share Data\20091115MMZ\NOV15\1324NOV15.wiff

Nominal mass ( $M_r$ ): 50195; Calculated pI value: 5.91

NCBI BLAST search of [gi|15230595](#) against nr

Unformatted [sequence string](#) for pasting into other applications

Taxonomy: [Arabidopsis thaliana](#)

Fixed modifications: Carbamidomethyl (C)

Variable modifications: Oxidation (M), Phospho (ST)

Cleavage by Trypsin: cuts C-term side of KR unless next residue is P

Sequence Coverage: 11%

Matched peptides shown in **Bold Red**

```
1 MASAAASSAF SLLKSTGAVA SSAGTRARAS LLPIPSTSVS ARPLGFSATL
51 DSRRFSLHVA SKVESVRGKG SRGVVSMAKK SVGDLT SADL KGKKVFVRAD
101 LNVPLDDNQIT ITDDTRIRAA IPTIKYLIEN GAKVILSTHL GRPKGVTPKF
151 SLAPLVPRLS ELLGIEVTKA DDCIGPEVES LVASLPEGGV LLENVRFYK
201 EEEKNDPEFA KKLASLADLY VNDAFGTAHR AHASTEGVTK FLKPSVAGFL
251 LQKELDYLVG AVSNPKRPF AIVGGSKVSS KIGVIESLLE KCDILLGGG
301 MIFTFYKAQG LSVGSSLVEE DKLELATELL AKAKAKGVSL LLPTDVVVAD
351 KFAPDANSKI VPASGIEDGW MGLDIGPDSI KTFNEALDTT QTVIWNQPMG
401 VFEMEKFAAG TEAIANKLAE LSEKGVTTII GGGDSVA AVE KVG VAGVMSH
451 ISTGGGASLE LLEGKVLPGV IALDEAIPVT V
```

Show predicted peptides also

Sort Peptides By

Residue Number  Increasing Mass  Decreasing Mass

| Start - End | Observed  | Mr (expt) | Mr (calc) | Delta  | Miss | Sequence                                                          |
|-------------|-----------|-----------|-----------|--------|------|-------------------------------------------------------------------|
| 81 - 91     | 553.3233  | 1104.6320 | 1104.5663 | 0.0657 | 0    | <b>K.SVGDLT SADL</b> .G ( <a href="#">Ions score 81</a> )         |
| 99 - 116    | 1008.5252 | 2015.0359 | 2014.9444 | 0.0916 | 0    | <b>R.ADLNVPLDDNQITITDDTR</b> .I ( <a href="#">Ions score 70</a> ) |
| 407 - 417   | 546.8217  | 1091.6288 | 1091.5611 | 0.0677 | 0    | <b>K.FAAGTEAIANK</b> .L ( <a href="#">Ions score 76</a> )         |
| 425 - 441   | 787.4640  | 1572.9135 | 1572.8359 | 0.0775 | 0    | <b>K.GVTTIIGGGDSVA AVE</b> .V ( <a href="#">Ions score 55</a> )   |

# gi|15219721 Malate dehydrogenase, cytosolic, putative

## Protein View

Match to: gi|15219721 Score: 338

malate dehydrogenase, cytosolic, putative [Arabidopsis thaliana]

Found in search of C:\QStar Share Data\20091115MMZ\NOV15\1509NOV15.wiff

Nominal mass ( $M_r$ ): 35890; Calculated pI value: 6.11

NCBI BLAST search of [gi|15219721](#) against nr

Unformatted [sequence string](#) for pasting into other applications

Taxonomy: [Arabidopsis thaliana](#)

Links to retrieve other entries containing this sequence from NCBI Entrez:

[gi|11133509](#) from [Arabidopsis thaliana](#)

[gi|2341034](#) from [Arabidopsis thaliana](#)

[gi|15215692](#) from [Arabidopsis thaliana](#)

[gi|17473717](#) from [Arabidopsis thaliana](#)

[gi|20148469](#) from [Arabidopsis thaliana](#)

[gi|21593602](#) from [Arabidopsis thaliana](#)

[gi|22137280](#) from [Arabidopsis thaliana](#)

Fixed modifications: Carbamidomethyl (C)

Variable modifications: Oxidation (M), Phospho (ST)

Cleavage by Trypsin: cuts C-term side of KR unless next residue is P

Sequence Coverage: 23%

Matched peptides shown in **Bold Red**

```
1 MAKEPVRVLV TGAAGQIGYA LVPMIARGIM LGADQPVILH MLDIPPAAEA
51 LNGVKMELID AAFPLLKGVV ATTDAVEGCT GNVNAVVMVGG FPRKEGMERK
101 DVMSKNVSIY KSQAAALEKH AAPNCKVLVV ANPANTNALI LKEFAPSIPE
151 KNISCLTRLD HNRALGQISE RLSVPVSDVK NVIIWGNHSS SQYPDVNHAK
201 VQTSSGEKPV RELVKDDAWL DGEFISTVQQ RGAIIKARK LSSALSAASS
251 ACDHIRDWVL GTPEGTFVSM GVYSDGSYSV PSGLIYSFPV TCRNGDWSIV
301 QGLPIDEVSR KKMDLTAEEL KEEKDLAYSC LS
```

| Start - End | Observed | Mr (expt) | Mr (calc) | Delta  | Miss | Sequence                                                                        |
|-------------|----------|-----------|-----------|--------|------|---------------------------------------------------------------------------------|
| 8 - 27      | 672.7596 | 2015.2569 | 2015.1238 | 0.1331 | 0    | <b>R.VLVTGAAGQIGYALVPMIAR.G</b> Oxidation (M) ( <a href="#">Ions score 67</a> ) |
| 56 - 67     | 688.9147 | 1375.8149 | 1375.7421 | 0.0728 | 0    | <b>K.MELIDAAFPLLK.G</b> Oxidation (M) ( <a href="#">Ions score 62</a> )         |
| 127 - 142   | 550.7117 | 1649.1134 | 1648.9876 | 0.1258 | 0    | <b>K.VLVVANPANTNALILK.E</b> ( <a href="#">Ions score 61</a> )                   |
| 143 - 151   | 509.3037 | 1016.5929 | 1016.5178 | 0.0750 | 0    | <b>K.EFAPSIPEK.N</b> ( <a href="#">Ions score 54</a> )                          |
| 172 - 180   | 472.3134 | 942.6123  | 942.5386  | 0.0737 | 0    | <b>R.LSVPVSDVK.N</b> ( <a href="#">Ions score 46</a> )                          |
| 313 - 324   | 484.6163 | 1450.8271 | 1450.6861 | 0.1411 | 1    | <b>K.MDLTAEELKEEK.D</b> Oxidation (M) ( <a href="#">Ions score 50</a> )         |

# gi|18404382 Malate dehydrogenase (NAD), mitochondrial

## Protein View

Match to: gi|18404382 Score: 114

malate dehydrogenase (NAD), mitochondrial [Arabidopsis thaliana]

Found in search of C:\QStar Share Data\20091115MMZ\NOV15\1737NOV15.wiff

Nominal mass ( $M_r$ ): 36010; Calculated pI value: 8.54

NCBI BLAST search of [gi|18404382](#) against nr

Unformatted [sequence string](#) for pasting into other applications

Taxonomy: [Arabidopsis thaliana](#)

Links to retrieve other entries containing this sequence from NCBI Entrez:

[gi|11133715](#) from [Arabidopsis thaliana](#)

[gi|11692836](#) from [Arabidopsis thaliana](#)

[gi|12642848](#) from [Arabidopsis thaliana](#)

[gi|3929649](#) from [Arabidopsis thaliana](#)

[gi|17065008](#) from [Arabidopsis thaliana](#)

[gi|22136210](#) from [Arabidopsis thaliana](#)

Fixed modifications: Carbamidomethyl (C)

Variable modifications: Oxidation (M), Phospho (ST)

Cleavage by Trypsin: cuts C-term side of KR unless next residue is P

Sequence Coverage: 7%

Matched peptides shown in **Bold Red**

```
1 MFRSMLVRSS ASAKQAVIRR SFSSGSVPER KVAILGAAGG IGQPLALLMK
51 LNPLVSSLSL YDIANTPGVA ADVGHINTRS EVVGYMGDDN LAKALEGADL
101 VIIPAGVPRK PGMTRDDLFN INAGIVKNLC TAIKYCPHA LINMISNPVN
151 STVPIAAEIF KKAGMYDEKK LFGVTTLDV V RARTFYAGKA NVPVAEVNVP
201 VIGGHAGVTI LPLFSQATPQ ANLSSDILTA LTKRTQDGGT EVVEAKAGKG
251 SATLSMAYAG ALFADACLKG LNGVPDVIEC SYVQSTITEL PFFASKVRLG
301 KNGVEEVL DL GPLSDFEKEG LEALKPELKS SIEKGVKFN Q
```

| Start - End      | Observed        | Mr (expt)        | Mr (calc)        | Delta         | Miss     | Sequence                                                           |
|------------------|-----------------|------------------|------------------|---------------|----------|--------------------------------------------------------------------|
| <b>80 - 93</b>   | <b>749.3788</b> | <b>1496.7431</b> | <b>1496.6817</b> | <b>0.0614</b> | <b>0</b> | <b>R.SEVVG<b>YMGDDN</b>LAK.A</b> ( <a href="#">Ions score 61</a> ) |
| <b>116 - 127</b> | <b>659.8656</b> | <b>1317.7167</b> | <b>1317.6929</b> | <b>0.0239</b> | <b>0</b> | <b>R.DDL<b>FN</b>INAGIVK.N</b> ( <a href="#">Ions score 53</a> )   |

# gi|207667274 Chloroplast malate dehydrogenase

## Protein View

Match to: gi|207667274 Score: 186

chloroplast malate dehydrogenase [Brassica rapa subsp. pekinensis]

Found in search of C:\QStar Share Data\20091115MMZ\NOV16\1660NOV16.wiff

Nominal mass ( $M_r$ ): 42520; Calculated pI value: 8.51

NCBI BLAST search of [gi|207667274](#) against nr

Unformatted [sequence string](#) for pasting into other applications

Taxonomy: [Brassica rapa subsp. pekinensis](#)

Fixed modifications: Carbamidomethyl (C)

Variable modifications: Oxidation (M), Phospho (ST)

Cleavage by Trypsin: cuts C-term side of KR unless next residue is P

Sequence Coverage: 8%

Matched peptides shown in **Bold Red**

```
1 MAAASSISIG STVPRASSSS SSSSLPQSRA QAVNFNYSLP RFTALRSSTL
51 LSGLDSSSFA KSLRGSVTKP QSTDTKPYGL NINASYKVAV LGAAGGIGQP
101 LSLLIKMSPL VSTLHLYDIA NVKGVAADLS HCNTPSQVRD FTGPAELADC
151 LKDVNVVVIP AGVPRKPGMT RDDLFINAG IVKTLVEAVA DNCPNAFIHI
201 ISNPNVNSTVP IAAEVLRRKG VYDPKKLFGV TTLDVVRANT FVSQKKNLKL
251 IDVDVPVIGG HAGITILPLL SKTKPSVSFT DEEIEKLTVR IQNAGTEVVD
301 AKAGAGSATL SMAYAAARFV ESSLRALDGD GDVYECFVD STLTDLPFFA
351 SRIKIGRNGV EAVIESDLQG LTEYEHKALE ALKPELKASI EKGVAFANKP
401 AN
```

Show predicted peptides also

Sort Peptides By

Residue Number  Increasing Mass  Decreasing Mass

| Start - End | Observed | Mr (expt) | Mr (calc) | Delta  | Miss | Sequence               |                                 |
|-------------|----------|-----------|-----------|--------|------|------------------------|---------------------------------|
| 172 - 183   | 659.8771 | 1317.7396 | 1317.6929 | 0.0468 | 0    | <b>R.DDLFINAGIVK.T</b> | <a href="#">(Ions score 42)</a> |
| 227 - 237   | 610.3864 | 1218.7583 | 1218.6972 | 0.0610 | 0    | <b>K.LFGVTTLDVVR.A</b> | <a href="#">(Ions score 75)</a> |
| 291 - 302   | 622.8679 | 1243.7212 | 1243.6408 | 0.0804 | 0    | <b>R.IQNAGTEVVDK.A</b> | <a href="#">(Ions score 69)</a> |



# gi|15231715 Fructose-bisphosphate aldolase, putative

## Protein View

Match to: gi|15231715 Score: 551

fructose-bisphosphate aldolase, putative [Arabidopsis thaliana]

Found in search of C:\QStar Share Data\20091115MM2\NOV17\1189NOV17.wiff

Nominal mass ( $M_r$ ): 38858; Calculated pI value: 6.05

NCBI BLAST search of [gi|15231715](#) against nr

Unformatted [sequence string](#) for pasting into other applications

Taxonomy: [Arabidopsis thaliana](#)

Fixed modifications: Carbamidomethyl (C)

Variable modifications: Oxidation (M), Phospho (ST)

Cleavage by Trypsin: cuts C-term side of KR unless next residue is P

Sequence Coverage: 25%

Matched peptides shown in **Bold Red**

```
1 MSAFTSKFAD ELIANAAYIG TPGKGILAAD ESTGTIGKRL ASINVENVET
51 NRRNLRELLF TAPGALPCLS GVILFEETLY QKSSDGKLFV DILKEGGVLP
101 GIKVDKGTVE LAGTDGETTT QGLDGLGDRC KKYEAGARF AKWRAVLKIG
151 ENEPSEHSIH ENAYGLARYA VICQENGLVP IVEPEILVDG SHDIQKCAAV
201 TERVLAACYK ALSDHHVLE GTLLKPNMVT PGSDSPKVSP EVIAHTVRA
251 LQRTVPAAVP AIVFLSGGQS EEEATRNLNA MNQLKTKKPW SLSFSFGRAL
301 QQSTLKTWAG KEENVKAAQE ALYVRCKANS EATLGTYKGD AKLGDGAAES
351 LHVKDYKY
```

Show predicted peptides also

Sort Peptides By

Residue Number  Increasing Mass  Decreasing Mass

| Start - End | Observed | Mr(expt)  | Mr(calc)  | Delta  | Miss | Sequence                                                             |
|-------------|----------|-----------|-----------|--------|------|----------------------------------------------------------------------|
| 25 - 38     | 666.8790 | 1331.7435 | 1331.6933 | 0.0502 | 0    | <b>K.GILAADESTGTIGK.R</b> ( <a href="#">Ions score 109</a> )         |
| 40 - 52     | 729.9181 | 1457.8217 | 1457.7474 | 0.0743 | 0    | <b>R.LASINVENVETNR.R</b> ( <a href="#">Ions score 93</a> )           |
| 95 - 103    | 435.3007 | 868.5868  | 868.5018  | 0.0850 | 0    | <b>K.EGGVLPGIK.V</b> ( <a href="#">Ions score 45</a> )               |
| 107 - 129   | 755.0596 | 2262.1570 | 2262.0612 | 0.0958 | 0    | <b>K.GTVELAGTDGETTTQGLDGLGDR.C</b> ( <a href="#">Ions score 77</a> ) |
| 317 - 325   | 510.8160 | 1019.6174 | 1019.5400 | 0.0774 | 0    | <b>K.AAQEALYVR.C</b> ( <a href="#">Ions score 87</a> )               |
| 328 - 338   | 577.8238 | 1153.6331 | 1153.5615 | 0.0716 | 0    | <b>K.ANSEATLGTYK.G</b> ( <a href="#">Ions score 79</a> )             |
| 343 - 354   | 598.8503 | 1195.6861 | 1195.6197 | 0.0664 | 0    | <b>K.LGDGAAESLHVK.D</b> ( <a href="#">Ions score 62</a> )            |

# gi|14334740 Putative fructose bisphosphate aldolase

## Protein View

Match to: gi|14334740 Score: 77

putative fructose bisphosphate aldolase [Arabidopsis thaliana]

Found in search of C:\QStar Share Data\20091115MMZ\NOV17\1354NOV17.wiff

Nominal mass ( $M_r$ ): 43033; Calculated pI value: 6.48

NCBI BLAST search of [gi|14334740](#) against nr

Unformatted [sequence string](#) for pasting into other applications

Taxonomy: [Arabidopsis thaliana](#)

Fixed modifications: Carbamidomethyl (C)

Variable modifications: Oxidation (M), Phospho (ST)

Cleavage by Trypsin: cuts C-term side of KR unless next residue is P

Sequence Coverage: 3%

Matched peptides shown in **Bold Red**

```
1 MASSTATMLK ASPVKSDWVK GQSLLLRQPS SVSAIRSHVA PSALTVRAAS
51 AYADELVKTA KTIASPGHGI MAMDESNATC GKRLASIGLE NTEANRQAYR
101 TLLVSAPGLG QYISGAILFE ETLYQSTTDG KKMVDVLEQ NIVPGIKVDK
151 GLVPLVGSYD ESWCQGLDGL ASRTAAYYQQ GARFAKWRTV VSIPNGPSAL
201 AVKEAAWGLA RYAAISQDSG LVPIVEPEIM LDGEHSIDRT YDVAEKVWAE
251 VFFYLAQNNV MFEGILLKPS MVTPGAETD RATPEQVASY TLKLLRNRIP
301 PAVPGIMFLS GGQSGLEATL NLNAMNQAPN PWHVSFSYAR ALQNTCLKTW
351 GGKEENVKAA QDILLARAKA NSLAQLGKYT GEGESEEAKE GMFVKGYTY
```

Show predicted peptides also

Sort Peptides By

Residue Number  Increasing Mass  Decreasing Mass

| Start - End | Observed | Mr(expt)  | Mr(calc)  | Delta  | Miss | Sequence                                                  |
|-------------|----------|-----------|-----------|--------|------|-----------------------------------------------------------|
| 282 - 293   | 654.3844 | 1306.7542 | 1306.6769 | 0.0773 | 0    | <b>R.ATPEQVASYTLK.L</b> ( <a href="#">Ions score 77</a> ) |

## Peptide View

MS/MS Fragmentation of **ATPEQVASYTLK**

Found in **gi|14334740**, putative fructose bisphosphate aldolase [Arabidopsis thaliana]

| #  | b         | b <sup>++</sup> | b <sup>*</sup> | b <sup>*++</sup> | b <sup>0</sup> | b <sup>0++</sup> | Seq. | y         | y <sup>++</sup> | y <sup>*</sup> | y <sup>*++</sup> | y <sup>0</sup> | y <sup>0++</sup> | #  |
|----|-----------|-----------------|----------------|------------------|----------------|------------------|------|-----------|-----------------|----------------|------------------|----------------|------------------|----|
| 1  | 72.0444   | 36.5258         |                |                  |                |                  | A    |           |                 |                |                  |                |                  | 12 |
| 2  | 173.0921  | 87.0497         |                |                  | 155.0815       | 78.0444          | T    | 1236.6470 | 618.8272        | 1219.6205      | 610.3139         | 1218.6365      | 609.8219         | 11 |
| 3  | 270.1448  | 135.5761        |                |                  | 252.1343       | 126.5708         | P    | 1135.5994 | 568.3033        | 1118.5728      | 559.7900         | 1117.5888      | 559.2980         | 10 |
| 4  | 399.1874  | 200.0974        |                |                  | 381.1769       | 191.0921         | E    | 1038.5466 | 519.7769        | 1021.5201      | 511.2637         | 1020.5360      | 510.7717         | 9  |
| 5  | 527.2460  | 264.1266        | 510.2195       | 255.6134         | 509.2354       | 255.1214         | Q    | 909.5040  | 455.2556        | 892.4775       | 446.7424         | 891.4934       | 446.2504         | 8  |
| 6  | 626.3144  | 313.6608        | 609.2879       | 305.1476         | 608.3039       | 304.6556         | V    | 781.4454  | 391.2264        | 764.4189       | 382.7131         | 763.4349       | 382.2211         | 7  |
| 7  | 697.3515  | 349.1794        | 680.3250       | 340.6661         | 679.3410       | 340.1741         | A    | 682.3770  | 341.6921        | 665.3505       | 333.1789         | 664.3665       | 332.6869         | 6  |
| 8  | 784.3836  | 392.6954        | 767.3570       | 384.1821         | 766.3730       | 383.6901         | S    | 611.3399  | 306.1736        | 594.3134       | 297.6603         | 593.3293       | 297.1683         | 5  |
| 9  | 947.4469  | 474.2271        | 930.4203       | 465.7138         | 929.4363       | 465.2218         | Y    | 524.3079  | 262.6576        | 507.2813       | 254.1443         | 506.2973       | 253.6523         | 4  |
| 10 | 1048.4946 | 524.7509        | 1031.4680      | 516.2376         | 1030.4840      | 515.7456         | T    | 361.2445  | 181.1259        | 344.2180       | 172.6126         | 343.2340       | 172.1206         | 3  |
| 11 | 1161.5786 | 581.2930        | 1144.5521      | 572.7797         | 1143.5681      | 572.2877         | L    | 260.1969  | 130.6021        | 243.1703       | 122.0888         |                |                  | 2  |
| 12 |           |                 |                |                  |                |                  | K    | 147.1128  | 74.0600         | 130.0863       | 65.5468          |                |                  | 1  |

# gi|34597330 Enolase

## Protein View

Match to: gi|34597330 Score: 683

enolase [Brassica rapa]

Found in search of C:\QStar Share Data\20091115MMZ\NOV15\988NOV15.wiff

Nominal mass ( $M_r$ ): 47631; Calculated pI value: 5.46

NCBI BLAST search of [gi|34597330](#) against nr

Unformatted [sequence string](#) for pasting into other applications

Taxonomy: [Brassica rapa subsp. campestris](#)

Fixed modifications: Carbamidomethyl (C)

Variable modifications: Oxidation (M), Phospho (ST)

Cleavage by Trypsin: cuts C-term side of KR unless next residue is P

Sequence Coverage: 32%

Matched peptides shown in **Bold Red**

1 MATITAVKAR QIFDSRGNPT VEVDVHTSSG **VKVTAAVPSG ASTGIYEAL**E  
51 **LRDGGSDYLG** KGVSKAVGNV NSIIGPASIG KDPTQQTAID NFMVHELDGT  
101 QNEWGWCKQK LGANAILAVS LAVCKAGAVV **SGIPLYKHIA** NLAGNPKIVL  
151 PVPAFNVING GSHAGNKLAM **QEFMILPVGA** **SSFKEAMKMG** VEVYHNLKSV  
201 IKKKYGQDAT **NVGDEGGFAP** **NIQENKEGLE** **LLKTAIEKAG** YTGKVVIGMD  
251 **VAASEFYSSD** **KTYDLNFKEE** **NNNGSQKISG** DALKDLYKSF VAEYPIVSIE  
301 DPFQDDWEH YAKMTAECGD NVQIVGDDLL VTNPKGVAKA IAEKSCNALL  
351 **LKVNQIGSVT** **ESIEAVKMSK** RAGWGMASH RSGETEDTFI ADLSVGLSTG  
401 QIKTGAPCRS ERLAKYNQLL **RIEELGSEA** **VYAGANFRKP** VEPY

| Start - End | Observed | Mr (expt) | Mr (calc) | Delta  | Miss | Sequence                                                                        |
|-------------|----------|-----------|-----------|--------|------|---------------------------------------------------------------------------------|
| 33 - 52     | 669.0596 | 2004.1568 | 2004.0528 | 0.1041 | 0    | <b>K.VTAAVPSGASTGIYEAL</b> LR.D ( <a href="#">Ions score 117</a> )              |
| 126 - 137   | 587.8896 | 1173.7646 | 1173.6758 | 0.0888 | 0    | <b>K.AGAVVSGIPLYK</b> .H ( <a href="#">Ions score 70</a> )                      |
| 168 - 184   | 634.3621 | 1900.0645 | 1899.9474 | 0.1171 | 0    | <b>K.LAMQEFMILPVGASSFK</b> .E 2 Oxidation (M) ( <a href="#">Ions score 55</a> ) |
| 204 - 226   | 818.0831 | 2451.2276 | 2451.1302 | 0.0973 | 1    | <b>K.KYGQDATNVGDEGGFAPNIQENK</b> .E ( <a href="#">Ions score 68</a> )           |
| 205 - 226   | 775.3973 | 2323.1700 | 2323.0353 | 0.1347 | 0    | <b>K.YGQDATNVGDEGGFAPNIQENK</b> .E ( <a href="#">Ions score 98</a> )            |
| 227 - 233   | 401.2810 | 800.5475  | 800.4643  | 0.0832 | 0    | <b>K.EGLELLK</b> .T ( <a href="#">Ions score 56</a> )                           |
| 245 - 261   | 917.4693 | 1832.9241 | 1832.8502 | 0.0739 | 0    | <b>K.VVIGMDVAASEFYSSDK</b> .T Oxidation (M) ( <a href="#">Ions score 71</a> )   |
| 262 - 277   | 634.3396 | 1899.9970 | 1899.8598 | 0.1372 | 1    | <b>K.TYDLNFK</b> EENNGSQK.I ( <a href="#">Ions score 16</a> )                   |
| 353 - 367   | 787.4640 | 1572.9135 | 1572.8359 | 0.0776 | 0    | <b>K.VNQIGSVT</b> ESIEAVK.M ( <a href="#">Ions score 83</a> )                   |
| 422 - 438   | 619.0080 | 1854.0022 | 1853.8795 | 0.1227 | 0    | <b>R.IEELGSEAVYAGANFR</b> .K ( <a href="#">Ions score 51</a> )                  |

# gi|18421656 EMB1467 (embryo defective 1467); NADH dehydrogenase

## Protein View

Match to: gi|18421656 Score: 128  
EMB1467 (EMBRYO DEFECTIVE 1467); NADH dehydrogenase [Arabidopsis thaliana]  
Found in search of C:\QStar Share Data\20091115MMZ\NOV17\385NOV17.wiff

Nominal mass (M<sub>r</sub>): 82557; Calculated pI value: 6.24  
NCBI BLAST search of [gi|18421656](#) against nr  
Unformatted [sequence string](#) for pasting into other applications

Taxonomy: [Arabidopsis thaliana](#)  
Links to retrieve other entries containing this sequence from NCBI Entrez:  
[gi|55977290](#) from [Arabidopsis thaliana](#)  
[gi|15810151](#) from [Arabidopsis thaliana](#)

Fixed modifications: Carbamidomethyl (C)  
Variable modifications: Oxidation (M), Phospho (ST)  
Cleavage by Trypsin: cuts C-term side of KR unless next residue is P  
Sequence Coverage: 6%

Matched peptides shown in **Bold Red**

```
1 MGLGILASRT IRPASRLQSQ QTSNFFLRTI VSKPELQSPE SAAVSEPEPP
51 TQILPPRNPF GGARVHFSNP EDAIEVFVDG YAVKVPKGFT VLQACEVAGV
101 DIPRFCYHSR LSIAGNCRMC LVEVEKSPKP VASCAMPALP GMKIKTDTPI
151 AKKAREGVME FLLMNHPLDC PICDQGGCED LQDQSMAGFS DRGRFTEMKR
201 SVVDKNLGPL VKTVMTRCIQ CTCRCVRFASE VAGVQDLGIL GRGSGEIIGT
251 YVEKLMTSEL SGNVIDICPV GALTSPKFAF KARNWELKAT ETIDVSDAVG
301 SNIRVDSRGP EVMRIIPRLN EDINEEWISD KTRFCYDGLK RQRLSDPMIR
351 DSDGRFKAVS WRDALAVVDG IIHQVKPDEI VGVAGQLSDA ESMMVLKDFV
401 NRMGSDNVWC EGTAAGVDAD LRYSYLMNTS ISGLENADLF LLIQTQPRVE
451 AAMVNARICK TVRASNAKVG YVGPPAEFNY DCKHLGTGPD TLKEIAEGRH
501 PFCTALKNAK NPAAIIVGAGL FNRTDKNAIL SSVESIAQAN NVVRPDWNGL
551 NFLLQYAAQA AALDLGLIQQ SAKALESAKF VYLMGADDVN VDKIPKDAFV
601 VYQGHGDKA VYRANVILPA SAFTEKEGTY ENTEGFTQQT VPAVPTVGDA
651 RDDWKIVRAL SEVSGVKLPY NSIEGVRSRI KSVAPNLVHT DEREPAAFGP
701 SLKPECKEAM STTPFQTVVE NPYMTNSITR ASKIMAQCSA VLLKKPFV
```

| Start - End | Observed | Mr (expt) | Mr (calc) | Delta  | Miss | Sequence                                                                |
|-------------|----------|-----------|-----------|--------|------|-------------------------------------------------------------------------|
| 243 - 254   | 634.8344 | 1267.6543 | 1267.5932 | 0.0611 | 0    | <b>R.GSGEEIIGTYVEK.L</b> ( <a href="#">Ions score 58</a> )              |
| 614 - 626   | 680.9005 | 1359.7865 | 1359.7398 | 0.0468 | 0    | <b>R.ANVILPASAFTEK.E</b> ( <a href="#">Ions score 37</a> )              |
| 627 - 651   | 889.7737 | 2666.2993 | 2666.2460 | 0.0532 | 0    | <b>K.EGTYENTEGFTQQTVPVAVPTVGDAR.D</b> ( <a href="#">Ions score 35</a> ) |

# gi|3122572 NADH-ubiquinone oxidoreductase 75 kDa subunit, mitochondrial

## Protein View

Match to: gi|3122572 Score: 135

RecName: Full=NADH-ubiquinone oxidoreductase 75 kDa subunit, mitochondrial; AltName: Full=76 kDa mitochondrial complex I subunit

Found in search of C:\QStar Share Data\20091115MMZ\NOV15\333NOV15.wiff

Nominal mass ( $M_r$ ): 80831; Calculated pI value: 5.87

NCBI BLAST search of [gi|3122572](#) against nr

Unformatted [sequence string](#) for pasting into other applications

Taxonomy: [Solanum tuberosum](#)

Links to retrieve other entries containing this sequence from NCBI Entrez:

[gi|758340](#) from [Solanum tuberosum](#)

Fixed modifications: Carbamidomethyl (C)

Variable modifications: Oxidation (M), Phospho (ST)

Cleavage by Trypsin: cuts C-term side of KR unless next residue is P

Sequence Coverage: 5%

Matched peptides shown in **Bold Red**

```
1 MGLGLLASRA LRSSRIIRNS TRTIVSTPEL KNADAAAAAA AADAPSDLPK
51 RHPVGGARVH LPNPEDVIEV FVDGYPVKIP KGMTVLQACE IAGVDIPRFC
101 YHSRLSIAGN CRMCLVEVEK SPKPVASCAM PALPGMKIKT DTPIAKKARE
151 GVMEFLLMNH PLDCPICDQG GECDLQDQSM AFGSDRGRFT EMKRSVVDKN
201 LGPLVKTVM T RCIQCTRCVR FASEVAGVED LGMLGRGSGE EIGTYVEKLM
251 TSELSGNVID ICPVGALTSK PFAFKARNWE LKGTESIDVT DAVGSNIRID
301 SRGPEVMRVV PRLNEDINEE WISDKTRFFY DGLKRQRLND PMIRGADGRF
351 QAVSWRDALA IVAEVMHQIK PEEIVGVAGK LSDAESMMAL KDLLNKMGSN
401 NIFCEGNGMH PNADLRSGYI MNTSISGLEK ADAFLLVGTQ PRVEAAMVNA
451 RIHKTVKATN AKVGVGPAA DFNYDHEHLG TDPQTLVEIA EGRHPFSSAL
501 KNAKNPVIIIV GAGVFDRDDK DAVFAAVDTI AKNNNVVRPD WNGLNVLLLN
551 AAQVAALDLG LVPESDKCIE SAKFVYLMGA DDVNLDKLPD DAFVVYQGHH
601 GDRGVYRANV ILPASAFTEK EGIYENTEKG AQITLPAVPT VGDARDDWKI
651 VRALSEVAGV GLPYDSLGA I RSRIKTVAPN LLEVDERQPA TFSTSLRPEV
701 SQKVSATPFT PAVENFYMTD AITRASKIMA QCSALLKK
```

| Start - End | Observed | Mr (expt) | Mr (calc) | Delta  | Miss | Sequence                                                      |
|-------------|----------|-----------|-----------|--------|------|---------------------------------------------------------------|
| 237 - 248   | 634.8232 | 1267.6318 | 1267.5932 | 0.0386 | 0    | <b>R.GSGEEIGTYVEK.L</b> ( <a href="#">Ions score 47</a> )     |
| 283 - 298   | 817.4321 | 1632.8496 | 1632.7955 | 0.0541 | 0    | <b>K.GTESIDVTDAVGSNIR.I</b> ( <a href="#">Ions score 22</a> ) |
| 608 - 620   | 680.9005 | 1359.7865 | 1359.7398 | 0.0468 | 0    | <b>R.ANVILPASAFTEK.E</b> ( <a href="#">Ions score 67</a> )    |

# gi|15223753 Ferredoxin-NADP(+)-oxidoreductase 2 (FNR2)

## Protein View

Match to: gi|15223753 Score: 66

FNR2 (FERREDOXIN-NADP(+)-OXIDOREDUCTASE 2); NADPH dehydrogenase/ oxidoreductase/ poly(U) binding [Arabidopsis thaliana]  
Found in search of C:\QStar Share Data\20091115MMZ\NOV26\1721NOV26.wiff

Nominal mass ( $M_r$ ): 41484; Calculated pI value: 8.51

NCBI BLAST search of [gi|15223753](#) against nr

Unformatted [sequence string](#) for pasting into other applications

Taxonomy: [Arabidopsis thaliana](#)

Fixed modifications: Carbamidomethyl (C)

Variable modifications: Deamidated (NQ),Gln->pyro-Glu (N-term Q),Oxidation (M)

Cleavage by Trypsin: cuts C-term side of KR unless next residue is P

Sequence Coverage: 3%

Matched peptides shown in **Bold Red**

```
1 MATTMNAAVS LTSSNSSSFP ATSCAIAPER IRFTKGAFYY KSNNVVTGKR
51 VFSIKAQIIT ETDTPPAKK VEKVSCKNEE GVIVNRYREP EPYTGKCLLN
101 TKITADDAPG ETWHMVFSHQ GEIPYREEGQS VGVIADGIDK NGKPHKVRLY
151 SIASSALGDL GNSETVSLCV KRLVYTNDQG ETVKGVCSNF LCDLAPGSDV
201 KLTGPVGKEM LMPKDPNATV IMLATGTGIA PFRSFLWKMF FEKHDDYKFN
251 GLAWLFLGVP TTSSLLYQEE FDKMKAKAPE NFRVDYAISR EQANDKGEKM
301 YIQTRMAQYA AELWELLKGD NTFVYMCGLK GMEKGIDDIM VSLAANDGID
351 WFDYKKQLKK AEQWNVEVY
```

Show predicted peptides also

Sort Peptides By

Residue Number  Increasing Mass  Decreasing Mass

| Start - End | Observed | Mr (expt) | Mr (calc) | Delta  | Miss | Sequence                                                      |
|-------------|----------|-----------|-----------|--------|------|---------------------------------------------------------------|
| 127 - 140   | 694.4326 | 1386.8506 | 1386.6991 | 0.1515 | 0    | R.EGQSVGV <b>IADGIDK</b> .N ( <a href="#">Ions score 66</a> ) |

## Peptide View

MS/MS Fragmentation of **EGQSVGVIADGIDK**

Found in **gi|15223753**, FNR2 (FERREDOXIN-NADP(+)-OXIDOREDUCTASE 2);

| #  | b         | b <sup>++</sup> | b <sup>*</sup> | b <sup>*++</sup> | b <sup>0</sup>  | b <sup>0++</sup> | Seq.     | y                | y <sup>++</sup> | y <sup>*</sup> | y <sup>*++</sup> | y <sup>0</sup>  | y <sup>0++</sup> | #  |
|----|-----------|-----------------|----------------|------------------|-----------------|------------------|----------|------------------|-----------------|----------------|------------------|-----------------|------------------|----|
| 1  | 130.0499  | 65.5286         |                |                  | 112.0393        | 56.5233          | <b>E</b> |                  |                 |                |                  |                 |                  | 14 |
| 2  | 187.0713  | 94.0393         |                |                  | 169.0608        | 85.0340          | <b>G</b> | 1258.6638        | 629.8355        | 1241.6372      | 621.3222         | 1240.6532       | 620.8302         | 13 |
| 3  | 315.1299  | 158.0686        | 298.1034       | 149.5553         | <b>297.1193</b> | 149.0633         | <b>Q</b> | 1201.6423        | 601.3248        | 1184.6157      | 592.8115         | 1183.6317       | 592.3195         | 12 |
| 4  | 402.1619  | 201.5846        | 385.1354       | 193.0713         | <b>384.1514</b> | 192.5793         | <b>S</b> | <b>1073.5837</b> | 537.2955        | 1056.5572      | 528.7822         | 1055.5732       | 528.2902         | 11 |
| 5  | 501.2304  | 251.1188        | 484.2038       | 242.6055         | 483.2198        | 242.1135         | <b>V</b> | <b>986.5517</b>  | 493.7795        | 969.5251       | 485.2662         | 968.5411        | 484.7742         | 10 |
| 6  | 558.2518  | 279.6295        | 541.2253       | 271.1163         | 540.2413        | 270.6243         | <b>G</b> | <b>887.4833</b>  | 444.2453        | 870.4567       | 435.7320         | 869.4727        | 435.2400         | 9  |
| 7  | 657.3202  | 329.1638        | 640.2937       | 320.6505         | 639.3097        | 320.1585         | <b>V</b> | <b>830.4618</b>  | 415.7345        | 813.4353       | 407.2213         | 812.4512        | 406.7293         | 8  |
| 8  | 770.4043  | 385.7058        | 753.3777       | 377.1925         | 752.3937        | 376.7005         | <b>I</b> | <b>731.3934</b>  | <b>366.2003</b> | 714.3668       | 357.6871         | <b>713.3828</b> | 357.1951         | 7  |
| 9  | 841.4414  | 421.2243        | 824.4149       | 412.7111         | 823.4308        | 412.2191         | <b>A</b> | <b>618.3093</b>  | 309.6583        | 601.2828       | 301.1450         | 600.2988        | 300.6530         | 6  |
| 10 | 956.4684  | 478.7378        | 939.4418       | 470.2245         | 938.4578        | 469.7325         | <b>D</b> | <b>547.2722</b>  | 274.1397        | 530.2457       | 265.6265         | 529.2617        | 265.1345         | 5  |
| 11 | 1013.4898 | 507.2485        | 996.4633       | 498.7353         | 995.4793        | 498.2433         | <b>G</b> | <b>432.2453</b>  | 216.6263        | 415.2187       | 208.1130         | 414.2347        | 207.6210         | 4  |
| 12 | 1126.5739 | 563.7906        | 1109.5473      | 555.2773         | 1108.5633       | 554.7853         | <b>I</b> | 375.2238         | 188.1155        | 358.1973       | 179.6023         | 357.2132        | 179.1103         | 3  |
| 13 | 1241.6008 | 621.3040        | 1224.5743      | 612.7908         | 1223.5903       | 612.2988         | <b>D</b> | <b>262.1397</b>  | 131.5735        | 245.1132       | 123.0602         | 244.1292        | 122.5682         | 2  |
| 14 |           |                 |                |                  |                 |                  | <b>K</b> | 147.1128         | 74.0600         | 130.0863       | 65.5468          |                 |                  | 1  |



# gi|15218869 NADP+ isocitrate dehydrogenase, putative

Match to: gi|15218869 Score: 130

isocitrate dehydrogenase, putative / NADP+ isocitrate dehydrogenase, putative [Arabidopsis thaliana]

Found in search of C:\QStar Share Data\20091115MMZ\NOV15\1140NOV15.wiff

Nominal mass ( $M_r$ ): 46059; Calculated pI value: 6.13

NCBI BLAST search of [gi|15218869](#) against nr

Unformatted [sequence string](#) for pasting into other applications

Taxonomy: [Arabidopsis thaliana](#)

Links to retrieve other entries containing this sequence from NCBI Entrez:

[gi|6227018](#) from [Arabidopsis thaliana](#)

[gi|16930443](#) from [Arabidopsis thaliana](#)

[gi|15010660](#) from [Arabidopsis thaliana](#)

[gi|20453235](#) from [Arabidopsis thaliana](#)

[gi|27311589](#) from [Arabidopsis thaliana](#)

Fixed modifications: Carbamidomethyl (C)

Variable modifications: Oxidation (M), Phospho (ST)

Cleavage by Trypsin: cuts C-term side of KR unless next residue is P

Sequence Coverage: 9%

Matched peptides shown in **Bold Red**

```
1 MAFEKIKVAN PIVEMDGDEM TRVIWKSIKD KLITPFVELD IKYFDLGLPH
51 RDATEDDKVTI ESAEATKKYN VAIKCATITP DEGRVTEFGL KQMWRSPNGT
101 IRNILNGTVF REPIICKNVP KLVPGWTKPI CIGRHAFGDQ YRATDAVIKQ
151 PGKLTMTFEG KDGKTETEVF TFTGEGGVAM AMYNTDESIR AFADASMNTA
201 YEKKWPLYLS TKNTILKKYD GRFKDIFQEV YEASWKSXYD AAGIWEHRL
251 IDDMVAYALK SEGgyvwack NYDGDVQSDf LAQGFgSLGL MTSVLVCPDG
301 KTIEAEEAHG TVTRHFRVHQ KGGETSTNSI ASIFAWTRGL AHRAKLDDNA
351 KLLDFTEKLE AACVGTVESG KMTKDLALII HGSKLSRDY LNTEEFIDAV
401 AAELKERLNA
```

Show predicted peptides also

Sort Peptides By

Residue Number  Increasing Mass  Decreasing Mass

| Start - End | Observed | Mr (expt) | Mr (calc) | Delta  | Miss | Sequence                                                              |
|-------------|----------|-----------|-----------|--------|------|-----------------------------------------------------------------------|
| 8 - 22      | 570.2836 | 1707.8290 | 1707.7444 | 0.0846 | 0    | K.VANPIVEMDGDEMTR.V 2 Oxidation (M) ( <a href="#">Ions score 51</a> ) |
| 52 - 67     | 565.3055 | 1692.8948 | 1692.8054 | 0.0894 | 1    | R.DATDDKVTIESAEATK.K ( <a href="#">Ions score 61</a> )                |
| 103 - 111   | 517.3137 | 1032.6129 | 1032.5716 | 0.0412 | 0    | R.NILNGTVFER.E ( <a href="#">Ions score 19</a> )                      |

# gi|520478 Pyruvate dehydrogenase E1 beta subunit

## Protein View

Match to: gi|8953766 Score: 223

pyruvate dehydrogenase E1 component beta subunit, mitochondrial precursor (PDHE1-B) [Arabidopsis thaliana]

Found in search of C:\QStar Share Data\20091115MMZ\NOV26\1378NOV26.wiff

Nominal mass ( $M_r$ ): 39436; Calculated pI value: 5.67

NCBI BLAST search of [gi|8953766](#) against nr

Unformatted [sequence string](#) for pasting into other applications

Taxonomy: [Arabidopsis thaliana](#)

Fixed modifications: Carbamidomethyl (C)

Variable modifications: Deamidated (NQ),Gln->pyro-Glu (N-term Q),Oxidation (M)

Cleavage by Trypsin: cuts C-term side of KR unless next residue is P

Sequence Coverage: 15%

Matched peptides shown in **Bold Red**

```
1 MLGILRQRAI DGASTLRRTR FALVSARSYA AGAKEMTVRD ALNSAIDEEM
51 SADPKVFVMG EEVGQYQGAY KIITKGLLEKY GPERVYDTPV TEAGFTGIGV
101 GAAYAGLKPV VEFMTFNFSM QAIDHIINSA AKSNYMSAGQ INVPIVFRGP
151 NGAAAGVGAQ HSQCYAAWYA SVPGLKVLAP YSAEDARGGLL KAAIRDPDFV
201 VFLENELLYG ESFPISEEAL DSSFCLPIGK AKIEREGKDV TIVTFSKMVG
251 FALKAAEKLA EEGISAEVIN LRSIRPLDRA TINASVRKTS RLVTVVEEGFP
301 QHGVCAEICA SVVEESFSYL DAPVERIAGA DVPMPYAANL ERLALPQIED
351 IVRASKRACY RSK
```

Show predicted peptides also

Sort Peptides By

Residue Number  Increasing Mass  Decreasing Mass

| Start - End      | Observed        | Mr (expt)        | Mr (calc)        | Delta         | Miss     | Sequence                                                                    |
|------------------|-----------------|------------------|------------------|---------------|----------|-----------------------------------------------------------------------------|
| <b>40 - 55</b>   | <b>861.4540</b> | <b>1720.8935</b> | <b>1720.7461</b> | <b>0.1474</b> | <b>0</b> | <b>R.DALNSAIDEEMSADPK.V</b> Oxidation (M) ( <a href="#">Ions score 17</a> ) |
| <b>177 - 187</b> | <b>596.3949</b> | <b>1190.7753</b> | <b>1190.5931</b> | <b>0.1822</b> | <b>0</b> | <b>K.VLAPYSAEDAR.G</b> ( <a href="#">Ions score 78</a> )                    |
| <b>259 - 272</b> | <b>757.5026</b> | <b>1512.9906</b> | <b>1512.8147</b> | <b>0.1759</b> | <b>0</b> | <b>K.LAEEGISA</b> EVINLR.S ( <a href="#">Ions score 100</a> )               |
| <b>327 - 342</b> | <b>852.4895</b> | <b>1702.9645</b> | <b>1702.8348</b> | <b>0.1296</b> | <b>0</b> | <b>R.IAGADVMPYA</b> ANLER.L Oxidation (M) ( <a href="#">Ions score 28</a> ) |

# gi|15225353 Succinyl-CoA ligase (GDP-forming) beta-chain, mitochondrial

## Protein View

Match to: gi|15225353 Score: 314

succinyl-CoA ligase (GDP-forming) beta-chain, mitochondrial, putative / succinyl-CoA synthetase, beta chain, putative  
Found in search of C:\QStar Share Data\20091115MMZ\NOV26\1297NOV26.wiff

Nominal mass ( $M_r$ ): 45602; Calculated pI value: 6.30

NCBI BLAST search of [gi|15225353](#) against nr

Unformatted [sequence string](#) for pasting into other applications

Taxonomy: [Arabidopsis thaliana](#)

Fixed modifications: Carbamidomethyl (C)

Variable modifications: Deamidated (NQ),Gln->pyro-Glu (N-term Q),Oxidation (M)

Cleavage by Trypsin: cuts C-term side of KR unless next residue is P

Sequence Coverage: 11%

Matched peptides shown in **Bold Red**

```
1 MRGLVNLKVS RLSISGKQW NQQLRRLNIH EYQGAELMGK YGVNVPKGVA
51 ASSLEEVKKA IQDVFPNESE LVVKSQILAG GRGLGTFKSG LKGGVHIVKR
101 DEAEIAGKM LGQVLVTKQT GPQGVVSKV YLCEKLSLVN EMYFSIILDR
151 KSAGPLIIAC KKGTSIEDL AEKFPDIIK VPIDVFAGIT DEDAAKVVVDG
201 LAPKAADRKD SIEQVKKLYE LFRKTDCTML EINPLAETST NQLVAADAKL
251 NFDDNAAFRQ KEVFAMRDPT QEDPREVAAA KVDLNYIGLD GEIGCMVNGA
301 GLAMATMDII KLHGTPANF LDVGGNASEH QVVEAFKILT SDDKVKAILV
351 NIFGGIMKCD VIASGIVNAA KEVALKVPV VRLEGTNVEQ GKRILKESGM
401 KLITADDLDD AAEKAVKALA H
```

Show predicted peptides also

Sort Peptides By

Residue Number  Increasing Mass  Decreasing Mass

| Start - End | Observed | Mr(expt)  | Mr(calc)  | Delta  | Miss | Sequence                                                      |
|-------------|----------|-----------|-----------|--------|------|---------------------------------------------------------------|
| 110 - 118   | 502.8666 | 1003.7187 | 1003.5736 | 0.1451 | 0    | K.MLGQVLVTK.Q Oxidation (M) ( <a href="#">Ions score 50</a> ) |
| 181 - 196   | 830.9909 | 1659.9673 | 1659.8356 | 0.1318 | 0    | K.VPIDVFAGITDEDAEK.V ( <a href="#">Ions score 102</a> )       |
| 250 - 259   | 591.8577 | 1181.7008 | 1181.5465 | 0.1542 | 0    | K.LNFDDNAAFR.Q ( <a href="#">Ions score 71</a> )              |
| 402 - 414   | 695.4093 | 1388.8040 | 1388.6671 | 0.1369 | 0    | K.LITADDLDDAEK.A ( <a href="#">Ions score 91</a> )            |

# gi|15232763 Adenosine kinase 1 (ADK1)

## Protein View

Match to: gi|15232763 Score: 149

ADK1 (ADENOSINE KINASE 1) [Arabidopsis thaliana]

Found in search of C:\QStar Share Data\20091115MMZ\NOV17\1354NOV17.wiff

Nominal mass ( $M_r$ ): 38268; Calculated pI value: 5.29

NCBI BLAST search of [gi|15232763](#) against nr

Unformatted [sequence string](#) for pasting into other applications

Taxonomy: [Arabidopsis thaliana](#)

Links to retrieve other entries containing this sequence from NCBI Entrez:

[gi|17367081](#) from [Arabidopsis thaliana](#)

[gi|6681336](#) from [Arabidopsis thaliana](#)

[gi|12017762](#) from [Arabidopsis thaliana](#)

[gi|12017766](#) from [Arabidopsis thaliana](#)

[gi|14030721](#) from [Arabidopsis thaliana](#)

Fixed modifications: Carbamidomethyl (C)

Variable modifications: Oxidation (M), Phospho (ST)

Cleavage by Trypsin: cuts C-term side of KR unless next residue is P

Sequence Coverage: 8%

Matched peptides shown in **Bold Red**

```
1 MASSDFDGIL LGMGNPLLDV SAVVDQQFLD KYDIKLNNAI LAEDKHLPY
51 DEMSQKFNVE YIAGGATQNS IKVAQWMLQV PGATSYMGSI GKDKYGEAMK
101 KDATAAGVYV HYYEDEATPT GTCGVCVLGG ERSLIANLSA ANCYKVEHLK
151 KPENWALVEK AKFYIAGFF LTVSPESIQL VREHAAANNK VFTMNLSPFF
201 ICEFFKDVQE KCLPYMDYIF GNETEARTFS RVHGWETDDV EQIAIKMSQL
251 PKASGTYKRT TVITQGADPV VVAEDGKVKK YPVIPLPEK LVDTNGAGDA
301 FVGGFLSQLV HGKGIIECVR AGCYASNVVI QRSRGCTYPEK PDFN
```

Show predicted peptides also

Sort Peptides By

Residue Number  Increasing Mass  Decreasing Mass

| Start - End | Observed | Mr (expt) | Mr (calc) | Delta  | Miss | Sequence                                                       |
|-------------|----------|-----------|-----------|--------|------|----------------------------------------------------------------|
| 36 - 45     | 550.8479 | 1099.6813 | 1099.5873 | 0.0940 | 0    | <b>K.LNNAILAEDK.H</b> ( <a href="#">Ions score 72</a> )        |
| 260 - 277   | 600.6869 | 1799.0390 | 1798.9313 | 0.1077 | 0    | <b>R.TTVITQGADPVVAEDGK.V</b> ( <a href="#">Ions score 77</a> ) |

# gi|1173347 Sedoheptulose-1,7-bisphosphatase

## Protein View

Match to: gi|786466 Score: 310

sedoheptulose-1,7-bisphosphatase; SBPase [Arabidopsis thaliana]

Found in search of C:\QStar Share Data\20091115MMZ\NOV26\1569NOV26.wiff

Nominal mass ( $M_r$ ): 42787; Calculated pI value: 6.17

NCBI BLAST search of [gi|786466](#) against nr

Unformatted [sequence string](#) for pasting into other applications

Taxonomy: [Arabidopsis thaliana](#)

Fixed modifications: Carbamidomethyl (C)

Variable modifications: Deamidated (NQ), Gln->pyro-Glu (N-term Q), Oxidation (M)

Cleavage by Trypsin: cuts C-term side of KR unless next residue is P

Sequence Coverage: 17%

Matched peptides shown in **Bold Red**

```
1  METSIACYSR GILPPSVSSQ RSSTLVSPPS YSTSSSFKRL KSSSIFGDSL
51  RLAPKSQLKA TKAKSNGAST VTKCEIGQSL EEFLAQATPD KGLRLLMCM
101 GEALRTIAFK VRTASCGGTA CVNSFGDEQL AVDMLADKLL FEALQYSHVC
151 KYACSEEVPE LQDMGGPVEG GFSVAFDPLD GSSIVDTNFT VGTIFGVWPG
201 DKLTGITGGD QVAAAMGIYG PRTTYVLAVK GFPGTHEFLL LDEGKWQHVK
251 ETEIEAEGKM FSPGNLRATF DNSEYSKLID YVVKEKYTLR YTGGMVPDVN
301 QIIVKEKGIF TNVTSPTAKA KLRLLEFVAP LGLLIENAGG FSSDGHKSVL
351 DKTIINLDDR TQVAYGSKNE IIRFEETLYG TSRLKNVPIG VTA
```

Show predicted peptides also

Sort Peptides By

Residue Number  Increasing Mass  Decreasing Mass

| Start - End | Observed | Mr (expt) | Mr (calc) | Delta  | Miss | Sequence                                                                   |
|-------------|----------|-----------|-----------|--------|------|----------------------------------------------------------------------------|
| 223 - 230   | 447.8325 | 893.6505  | 893.5222  | 0.1283 | 0    | <b>R.TTYVLAVK.G</b> ( <a href="#">Ions score 29</a> )                      |
| 260 - 267   | 469.3011 | 936.5876  | 936.4487  | 0.1389 | 0    | <b>K.MFSPGNLR.A</b> Oxidation (M) ( <a href="#">Ions score 32</a> )        |
| 268 - 277   | 581.3380 | 1160.6615 | 1160.4986 | 0.1630 | 0    | <b>R.ATFDNSEYSK.L</b> ( <a href="#">Ions score 74</a> )                    |
| 278 - 284   | 457.3195 | 912.6244  | 912.4957  | 0.1288 | 0    | <b>K.LIDYYVK.E</b> ( <a href="#">Ions score 32</a> )                       |
| 291 - 305   | 825.4925 | 1648.9704 | 1648.8495 | 0.1209 | 0    | <b>R.YTGGMVPDVNQIIVK.E</b> Oxidation (M) ( <a href="#">Ions score 32</a> ) |
| 308 - 319   | 618.4195 | 1234.8245 | 1234.6558 | 0.1687 | 0    | <b>K.GIFTNVTSP</b> TAK.A ( <a href="#">Ions score 59</a> )                 |
| 374 - 383   | 601.8691 | 1201.7237 | 1201.5615 | 0.1622 | 0    | <b>R.FEETLYG</b> TSR.L ( <a href="#">Ions score 53</a> )                   |

# gi|15222241 Allene oxide cyclase 4 (AOC4)

## Protein View

Match to: gi|15222241 Score: 75

AOC4 (ALLENE OXIDE CYCLASE 4); allene-oxide cyclase [Arabidopsis thaliana]

Found in search of D:\Sixue Chen-don't delete please\20091115MMZ\DEC01\2384.wiff

Nominal mass ( $M_r$ ): 27963; Calculated pI value: 9.15

NCBI BLAST search of [gi|15222241](#) against nr

Unformatted [sequence string](#) for pasting into other applications

Taxonomy: [Arabidopsis thaliana](#)

Fixed modifications: Carbamidomethyl (C)

Variable modifications: Deamidated (NQ), Gln->pyro-Glu (N-term Q), Oxidation (M)

Cleavage by Trypsin: cuts C-term side of KR unless next residue is P

Sequence Coverage: 5%

Matched peptides shown in **Bold Red**

```
1 MIMASSAAAS ISMITLRNLS RNHQSHQSTF LGFSRSFHNQ RISSNSPGLS
51 TRARSTTSST GFFFR TICSS SSNDYSRPTK IQELNVYEFN EGDRNSPAVL
101 KLGKKPDQLC LGDLVPFTNK LYTGDLTKRI GITAGLCVLI QHVPEKKGDR
151 FEASYSFYFG DYGHISVQGP YLTYEDTFLA ITGGSGVFEG AYGQVKLRQL
201 VYPTKLFYTF YLKGVAADLP VELTGKHVEP SKEVKPAAEA QATQPGATIA
251 NFTN
```

Show predicted peptides also

Sort Peptides By

Residue Number  Increasing Mass  Decreasing Mass

| Start - End | Observed | Mr (expt) | Mr (calc) | Delta  | Miss | Sequence                  |                                   |
|-------------|----------|-----------|-----------|--------|------|---------------------------|-----------------------------------|
| 81 - 94     | 863.4992 | 1724.9837 | 1724.8006 | 0.1832 | 0    | <b>K.IQELNVYEFNEGDR.N</b> | ( <a href="#">Ions score 75</a> ) |

## Peptide View

MS/MS Fragmentation of **IQELNVYEFNEGDR**

Found in **gi|15222241**, AOC4 (ALLENE OXIDE CYCLASE 4); allene-oxide cyclase [*Arabidopsis thaliana*]

| #  | b               | b <sup>++</sup> | b*              | b <sup>+++</sup> | b <sup>0</sup> | b <sup>0++</sup> | Seq. | y                | y <sup>++</sup> | y*              | y <sup>+++</sup> | y <sup>0</sup>   | y <sup>0++</sup> | #  |
|----|-----------------|-----------------|-----------------|------------------|----------------|------------------|------|------------------|-----------------|-----------------|------------------|------------------|------------------|----|
| 1  | 114.0913        | 57.5493         |                 |                  |                |                  | I    |                  |                 |                 |                  |                  |                  | 14 |
| 2  | <b>242.1499</b> | 121.5786        | <b>225.1234</b> | 113.0653         |                |                  | Q    | 1612.7238        | 806.8655        | 1595.6972       | <b>798.3523</b>  | 1594.7132        | 797.8603         | 13 |
| 3  | <b>371.1925</b> | 186.0999        | 354.1660        | 177.5866         | 353.1819       | 177.0946         | E    | <b>1484.6652</b> | 742.8362        | 1467.6387       | 734.3230         | <b>1466.6546</b> | 733.8310         | 12 |
| 4  | <b>484.2766</b> | <b>242.6419</b> | <b>467.2500</b> | 234.1287         | 466.2660       | 233.6366         | L    | <b>1355.6226</b> | 678.3149        | 1338.5961       | 669.8017         | 1337.6121        | 669.3097         | 11 |
| 5  | 598.3195        | 299.6634        | <b>581.2930</b> | 291.1501         | 580.3089       | 290.6581         | N    | <b>1242.5386</b> | 621.7729        | 1225.5120       | 613.2596         | 1224.5280        | 612.7676         | 10 |
| 6  | 697.3879        | 349.1976        | 680.3614        | 340.6843         | 679.3774       | 340.1923         | V    | <b>1128.4956</b> | 564.7515        | 1111.4691       | 556.2382         | 1110.4851        | 555.7462         | 9  |
| 7  | 860.4512        | 430.7293        | 843.4247        | 422.2160         | 842.4407       | 421.7240         | Y    | <b>1029.4272</b> | 515.2172        | 1012.4007       | 506.7040         | <b>1011.4167</b> | 506.2120         | 8  |
| 8  | 989.4938        | 495.2506        | 972.4673        | 486.7373         | 971.4833       | 486.2453         | E    | <b>866.3639</b>  | 433.6856        | 849.3373        | 425.1723         | <b>848.3533</b>  | 424.6803         | 7  |
| 9  | 1136.5623       | 568.7848        | 1119.5357       | 560.2715         | 1118.5517      | 559.7795         | F    | <b>737.3213</b>  | 369.1643        | <b>720.2947</b> | 360.6510         | 719.3107         | 360.1590         | 6  |
| 10 | 1250.6052       | 625.8062        | 1233.5786       | 617.2930         | 1232.5946      | 616.8009         | N    | <b>590.2529</b>  | 295.6301        | <b>573.2263</b> | 287.1168         | 572.2423         | 286.6248         | 5  |
| 11 | 1379.6478       | 690.3275        | 1362.6212       | 681.8142         | 1361.6372      | 681.3222         | E    | 476.2100         | 238.6086        | 459.1834        | 230.0953         | 458.1994         | 229.6033         | 4  |
| 12 | 1436.6692       | 718.8383        | 1419.6427       | 710.3250         | 1418.6587      | 709.8330         | G    | <b>347.1674</b>  | 174.0873        | 330.1408        | 165.5740         | 329.1568         | 165.0820         | 3  |
| 13 | 1551.6962       | 776.3517        | 1534.6696       | 767.8385         | 1533.6856      | 767.3464         | D    | 290.1459         | 145.5766        | 273.1193        | 137.0633         | 272.1353         | 136.5713         | 2  |
| 14 |                 |                 |                 |                  |                |                  | R    | <b>175.1190</b>  | 88.0631         | 158.0924        | 79.5498          |                  |                  | 1  |

# gi|1526562 Glutamine synthetase

## Protein View

Match to: gi|1526562 Score: 99

glutamine synthetase [Raphanus sativus]

Found in search of C:\QStar Share Data\20091115MMZ\NOV15\1509NOV15.wiff

Nominal mass ( $M_r$ ): 38722; Calculated pI value: 5.93

NCBI BLAST search of [gi|1526562](#) against nr

Unformatted [sequence string](#) for pasting into other applications

Taxonomy: [Raphanus sativus](#)

Fixed modifications: Carbamidomethyl (C)

Variable modifications: Oxidation (M), Phospho (ST)

Cleavage by Trypsin: cuts C-term side of KR unless next residue is P

Sequence Coverage: 5%

Matched peptides shown in **Bold Red**

```
1 MSLLSDLVNL NLSNSTEKII AEYIWIGGSG MDIRSKARTL PGPVSDPSKL
51 PKWNYDGSST GQAAGDDSEV IIYPQAI FRD PFRRGNNILV MCDAYTPAGN
101 PIPTNKRHNA AKIFSTSKVA SEEPWYGIEQ EYTLMQKGVN WPIGWVPGGF
151 PGPQGPYYCG VGADKAIGRD IVD AHYKACL YAGISISGVN GEVMPGQWEF
201 QVGPVEGISA GDQVWVARFL LERITEISGV NVSFDPKPVP GDWNGAGAHC
251 NYSTKSMRND GGLAVIKKAI EKLQVKHKEH IAAYGEGNER RLTGKHETAD
301 INTFSWGVAN RGASVRVGRD TEKEGKGYFE DRRPASNMDP YVVTSMIAET
351 TILG
```

Show predicted peptides also

Sort Peptides By

Residue Number  Increasing Mass  Decreasing Mass

| Start - End | Observed | Mr (expt) | Mr (calc) | Delta  | Miss | Sequence                                          |
|-------------|----------|-----------|-----------|--------|------|---------------------------------------------------|
| 39 - 49     | 549.3403 | 1096.6660 | 1096.5764 | 0.0895 | 0    | R.TLPGPVSDPSK.L ( <a href="#">Ions score 57</a> ) |
| 259 - 267   | 443.7891 | 885.5636  | 885.4920  | 0.0716 | 0    | R.NDGGLAVIK.K ( <a href="#">Ions score 43</a> )   |



# gi|1113783 Thi1 protein

## Protein View

Match to: gi|1113783 Score: 206

Thi1 protein [Arabidopsis thaliana]

Found in search of D:\Sixue Chen-don't delete please\20091115MMZ\DEC01\1791.wiff

Nominal mass (M<sub>r</sub>): 36755; Calculated pI value: 5.82

NCBI BLAST search of [gi|1113783](#) against nr

Unformatted [sequence string](#) for pasting into other applications

Taxonomy: [Arabidopsis thaliana](#)

Fixed modifications: Carbamidomethyl (C)

Variable modifications: Deamidated (NQ), Gln->pyro-Glu (N-term Q), Oxidation (M)

Cleavage by Trypsin: cuts C-term side of KR unless next residue is P

Sequence Coverage: 13%

Matched peptides shown in **Bold Red**

```
1  MAAIASLTL  SSTKPQRLFD  SSFHGSAISA  APISIGLKPR  SFSVRATTAG
51 YDLNAFTFDP  IKESIVSREM  TRRYMTDMIT  YAETDVVVVG  AGSAGLSAAY
101 EISKNPVQV  AIIEQSVSPG  GGAWLGGQLF  SAMIVRKPAH  LFLDEIGVAY
151 DEQDTYVVVK  HAALFTSTIM  SKLLARPVVK  LFNAVAEEDL  IVKGNRVGGV
201 VTNWALVAQN  HHTQSCMDPN  VMEAKIVVSS  CGHDGPFGAT  GVKRLKSIGM
251 IDHVPGMKAL  DMNTAEDAIV  RLTREVVPGM  IVTGMEVAEI  DGAPRMGPTF
301 GAMMISGQKA  GQLALKALGL  PNAIDGTLVG  NLSPELVLAA  ADSAETVDA
```

Show predicted peptides also

Sort Peptides By

Residue Number  Increasing Mass  Decreasing Mass

| Start - End | Observed | Mr (expt) | Mr (calc) | Delta  | Miss | Sequence                                                                           |
|-------------|----------|-----------|-----------|--------|------|------------------------------------------------------------------------------------|
| 181 - 193   | 702.0289 | 1402.0433 | 1401.7867 | 0.2566 | 0    | <b>K.LFNAVAEEDLIVK.G</b> ( <a href="#">Ions score 46</a> )                         |
| 259 - 271   | 717.9794 | 1433.9442 | 1433.6820 | 0.2622 | 0    | <b>K.ALDMNTAEDAIVR.L</b> Oxidation (M) ( <a href="#">Ions score 107</a> )          |
| 275 - 295   | 734.8228 | 2201.4466 | 2201.0708 | 0.3758 | 0    | <b>R.EVVPGMIVTGMEVAEIDGAPR.M</b> 2 Oxidation (M) ( <a href="#">Ions score 52</a> ) |

# gi|16394 Leucine aminopeptidase

## Protein View

Match to: gi|16394 Score: 62  
leucine aminopeptidase [Arabidopsis thaliana]  
Found in search of C:\QStar Share Data\20091115MMZ\NOV26\828NOV26.wiff

Nominal mass ( $M_r$ ): 54760; Calculated pI value: 5.66  
NCBI BLAST search of [gi|16394](#) against nr  
Unformatted [sequence string](#) for pasting into other applications

Taxonomy: [Arabidopsis thaliana](#)

Fixed modifications: Carbamidomethyl (C)  
Variable modifications: Deamidated (NQ), Gln->pyro-Glu (N-term Q), Oxidation (M)  
Cleavage by Trypsin: cuts C-term side of KR unless next residue is P  
Sequence Coverage: 2%

Matched peptides shown in **Bold Red**

```
1 MAHTLGLTQP NSTEPHKISF TAKEIDVIEW KGDILVVGVT EKDLAKDGNS
51 KFENPILSKV DAHLSGLLAQ VSSEEDFTGK PGQSTVLRRLP GLGSKRIALI
101 GLGQSVSSPV AFHSLGEAVA TVSKASQSTS AAIVLASSVS DESKLSSVSA
151 LASGIVLGLF EDGRYKSESK KPSLKAVDII GFGTGAEVEK KLKYAEDVSY
201 GVIFGRELIN SPANVLTPAV LAEEAAKVAS TYSDVFTANI LNEEQCKELK
251 MGSYLAVAAA SANPPHFIHL VYKPPNGSVK TKLALVGKGL TFDSSGGYNIK
301 TGPGCSIEML KFDMGSSAAV LGAAKAIGEI KPPGVEVHFI VAACENMISG
351 TGMRPGDVIT ASNGKTIEVN NTDAEGRLTL ADALVYACNQ GVDKIVDLAT
401 LTGACVIALG TSMAGIYTPS DELAKEVIAA SERSGEKLWR MPLEESYWEM
451 MKSGVADMVN TGGRAGGSIT AALFLKQFVS EKVQWMHIDM AGPVWNEKKK
501 SGTGFGVATL VEWVQKNSSS
```

Show predicted peptides also

Sort Peptides By

Residue Number  Increasing Mass  Decreasing Mass

| Start - End | Observed | Mr(expt)  | Mr(calc)  | Delta  | Miss | Sequence                                                  |
|-------------|----------|-----------|-----------|--------|------|-----------------------------------------------------------|
| 366 - 377   | 659.9230 | 1317.8314 | 1317.6161 | 0.2153 | 0    | <b>K.TIEVNNTDAEGR.L</b> ( <a href="#">Ions score 62</a> ) |

## Peptide View

MS/MS Fragmentation of **TIEVNNTDAEGR**

Found in [gi|16394](#), leucine aminopeptidase [*Arabidopsis thaliana*]

| #  | b               | b <sup>++</sup> | b*        | b <sup>*++</sup> | b <sup>0</sup> | b <sup>0++</sup> | Seq.     | y                | y <sup>++</sup> | y*              | y <sup>*++</sup> | y <sup>0</sup>  | y <sup>0++</sup> | #  |
|----|-----------------|-----------------|-----------|------------------|----------------|------------------|----------|------------------|-----------------|-----------------|------------------|-----------------|------------------|----|
| 1  | 102.0550        | 51.5311         |           |                  | 84.0444        | 42.5258          | <b>T</b> |                  |                 |                 |                  |                 |                  | 12 |
| 2  | <b>215.1390</b> | 108.0731        |           |                  | 197.1285       | 99.0679          | <b>I</b> | 1217.5757        | 609.2915        | 1200.5491       | 600.7782         | 1199.5651       | 600.2862         | 11 |
| 3  | <b>344.1816</b> | 172.5944        |           |                  | 326.1710       | 163.5892         | <b>E</b> | <b>1104.4916</b> | 552.7494        | 1087.4651       | 544.2362         | 1086.4810       | 543.7442         | 10 |
| 4  | 443.2500        | 222.1287        |           |                  | 425.2395       | 213.1234         | <b>V</b> | <b>975.4490</b>  | 488.2281        | 958.4225        | 479.7149         | 957.4384        | 479.2229         | 9  |
| 5  | 557.2930        | 279.1501        | 540.2664  | 270.6368         | 539.2824       | 270.1448         | <b>N</b> | <b>876.3806</b>  | 438.6939        | <b>859.3540</b> | 430.1807         | 858.3700        | 429.6887         | 8  |
| 6  | 671.3359        | 336.1716        | 654.3093  | 327.6583         | 653.3253       | 327.1663         | <b>N</b> | <b>762.3377</b>  | 381.6725        | 745.3111        | 373.1592         | 744.3271        | 372.6672         | 7  |
| 7  | 772.3836        | 386.6954        | 755.3570  | 378.1821         | 754.3730       | 377.6901         | <b>T</b> | <b>648.2947</b>  | 324.6510        | 631.2682        | 316.1377         | 630.2842        | 315.6457         | 6  |
| 8  | 887.4105        | 444.2089        | 870.3840  | 435.6956         | 869.3999       | 435.2036         | <b>D</b> | <b>547.2471</b>  | 274.1272        | 530.2205        | 265.6139         | <b>529.2365</b> | 265.1219         | 5  |
| 9  | 958.4476        | 479.7274        | 941.4211  | 471.2142         | 940.4371       | 470.7222         | <b>A</b> | <b>432.2201</b>  | 216.6137        | 415.1936        | 208.1004         | 414.2096        | 207.6084         | 4  |
| 10 | 1087.4902       | 544.2487        | 1070.4637 | 535.7355         | 1069.4796      | 535.2435         | <b>E</b> | 361.1830         | 181.0951        | <b>344.1565</b> | 172.5819         | 343.1724        | 172.0899         | 3  |
| 11 | 1144.5117       | 572.7595        | 1127.4851 | 564.2462         | 1126.5011      | 563.7542         | <b>G</b> | <b>232.1404</b>  | 116.5738        | <b>215.1139</b> | 108.0606         |                 |                  | 2  |
| 12 |                 |                 |           |                  |                |                  | <b>R</b> | 175.1190         | 88.0631         | 158.0924        | 79.5498          |                 |                  | 1  |

# gi|572517 Cysteine synthase

## Protein View

Match to: gi|572517 Score: 198  
cysteine synthase [Arabidopsis thaliana]  
Found in search of C:\QStar Share Data\20091115MMZ\NOV17\1656NOV17.wiff

Nominal mass ( $M_r$ ): 41976; Calculated pI value: 8.13  
NCBI BLAST search of [gi|572517](#) against nr  
Unformatted [sequence string](#) for pasting into other applications

Taxonomy: [Arabidopsis thaliana](#)

Fixed modifications: Carbamidomethyl (C)  
Variable modifications: Oxidation (M), Phospho (ST)  
Cleavage by Trypsin: cuts C-term side of KR unless next residue is P  
Sequence Coverage: 9%

Matched peptides shown in **Bold Red**

```
1 MAATSSSAFL LNPLTSRHRP FKYSPELSSL SLSSRKAAAF DVSSAAFTLK
51 RQSRSDVVCK AVSIKPEAGV EGLNIADNAA QLIGKTPMVY LNNVVKGCVA
101 SVAAKLEIME PCCSVKDRIG YSMITDAEEK GLITPGKSVL VESTSGNTGI
151 GLAFIAASKG YKLILTMPAS MSLERRVLLR AFGAELVLTE PAKGMTGAIQ
201 KAEIILKKTTP NSYMLQQFDN PANPKIHJET TNPEIWEDTR GKIDILVAGI
251 GTGGTITGVG RFIKERKPEL KVIGVEPTES AILSGGKTGP HKIQQIGAGF
301 VPKNLDLAIIV DEYIAISSEE AIETSKQLAL QEGLLVGISS GAAAAAAIQV
351 AKRPENAGKL IAVVFPSPFGE RYLSTQLFQS IREECEQMOP EL
```

Show predicted peptides also

Sort Peptides By

Residue Number  Increasing Mass  Decreasing Mass

| Start - End | Observed | Mr (expt) | Mr (calc) | Delta  | Miss | Sequence                                                                   |
|-------------|----------|-----------|-----------|--------|------|----------------------------------------------------------------------------|
| 119 - 130   | 678.8753 | 1355.7360 | 1355.6279 | 0.1081 | 0    | <b>R.IGYSMITDAEEK.G</b> ( <a href="#">Ions score 58</a> )                  |
| 119 - 130   | 686.8658 | 1371.7171 | 1371.6228 | 0.0944 | 0    | <b>R.IGYSMITDAEEK.G</b> Oxidation (M) ( <a href="#">Ions score 84</a> )    |
| 163 - 175   | 747.4371 | 1492.8596 | 1492.7629 | 0.0967 | 0    | <b>K.LILTMPASMSLER.R</b> 2 Oxidation (M) ( <a href="#">Ions score 45</a> ) |
| 181 - 193   | 673.4197 | 1344.8248 | 1344.7289 | 0.0959 | 0    | <b>R.AFGAELVLTEPAK.G</b> ( <a href="#">Ions score 69</a> )                 |

# gi|257676175 Unnamed protein product, containing CIMS (cobalamine independent methonine synthase) domain

Match to: gi|257676175 Score: 238

unnamed protein product [Brassica napus]

Found in search of C:\QStar Share Data\20091115MMZ\NOV26\383NOV26.wiff

Nominal mass ( $M_r$ ): 84728; Calculated pI value: 6.05

NCBI BLAST search of [gi|257676175](#) against nr

Unformatted [sequence string](#) for pasting into other applications

Fixed modifications: Carbamidomethyl (C)

Variable modifications: Deamidated (NQ),Gln->pyro-Glu (N-term Q),Oxidation (M)

Cleavage by Trypsin: cuts C-term side of KR unless next residue is P

Sequence Coverage: 5%

Matched peptides shown in **Bold Red**

```
1 MASHIVGYPR MGPKRELKFA LESFWDGKST AEDLQKVSAD IRSGIWKQMS
51 EAGTKYIPSN TFAHYDQVLD TTAMLGAVPP RYGYTSGEIG LDVYFSMARG
101 NASVPAMEMT KWFDNTNYHYI VPGLGPDVKF SYASHKAVNE YKEAKALGVD
151 TVPVLVGPVS YLLLSKAAKG VEKSFDDLSS LPKILPVYKE VITELKAAGA
201 TWIQLDEPVL VMDLEGHKLQ ALTGAYAELE STLSGLNLVLY ETYFADIPAE
251 AYKTLTSLKG VTAFGFDLVR GTKTLDLVKA GFPEGKYLFA GVVDGRNIWA
301 NDFAASLSTL EALEGVVGKD KLVVSTSCSL LHTAVDLVNE TKLDDEIKSW
351 LAFAAQKIVE VNALAKALAG QKDEALFSAN AAALASRRSS PRVTNEGVOK
401 AAAALKGSDH RRATNVSARL DAQQKKNLNP ILPTTTIGSF PQTVELRRVR
451 REYKAKKVSE EDYVKAMKEE IKKVVDLQEE LDIDVLVHGE PERNDMVEYF
501 GEQLSGFAFT ANGWWQSYGS RCVKPPVIYG DVSRPKAMTV FWSAMAQSMY
551 SRPMKGLMTG PVTILNWSFV RNDQPRHETC YQIALAIKDE VEDLEKGGIG
601 VIQIDEAALR EGLPLRKSEH AFYLDWAVHS FRITNCGVQD TTQIHTHMCY
651 SHFNDIHHSI IDMDADVITI ENSRSDEKLL SVFREGVKYG AGIGPGVYDI
701 HSPRIPSTEE IAERVNKMLA VLEQNILWVN PDCGLKTRKY TEVKPALKNM
751 VDAAKLIRSQ LASAK
```

Show predicted peptides also

Sort Peptides By

Residue Number  Increasing Mass  Decreasing Mass

| Start - End | Observed | Mr (expt) | Mr (calo) | Delta  | Miss | Sequence                                                         |
|-------------|----------|-----------|-----------|--------|------|------------------------------------------------------------------|
| 100 - 111   | 626.3599 | 1250.7052 | 1250.5635 | 0.1417 | 0    | R.GNASVPAMEMTK.W Oxidation (M) ( <a href="#">Ions score 40</a> ) |
| 373 - 387   | 753.9561 | 1505.8976 | 1505.7474 | 0.1502 | 0    | K.DEALFSANAAALASR.R ( <a href="#">Ions score 85</a> )            |
| 458 - 465   | 484.8031 | 967.5915  | 967.4498  | 0.1417 | 0    | K.VSEEDYVK.A ( <a href="#">Ions score 53</a> )                   |
| 705 - 714   | 572.8663 | 1143.7181 | 1143.5771 | 0.1409 | 0    | R.IPSTEEIAER.V ( <a href="#">Ions score 61</a> )                 |

# gi|4803926 Putative triosephosphate isomerase

## Protein View

Match to: gi|4803926 Score: 200

putative triosephosphate isomerase [Arabidopsis thaliana]

Found in search of D:\Sixue Chen-don't delete please\20091115MMZ\DEC01\2073.wiff

Nominal mass ( $M_r$ ): 33553; Calculated pI value: 7.67

NCBI BLAST search of [gi|4803926](#) against nr

Unformatted [sequence string](#) for pasting into other applications

Taxonomy: [Arabidopsis thaliana](#)

Fixed modifications: Carbamidomethyl (C)

Variable modifications: Deamidated (NQ), Gln->pyro-Glu (N-term Q), Oxidation (M)

Cleavage by Trypsin: cuts C-term side of KR unless next residue is P

Sequence Coverage: 16%

Matched peptides shown in **Bold Red**

```
1 MAATSLTAPP SFSGLRRISP KLDAAAVSSH QSFFHRVNSS TRLVSSSSSS
51 HRSPRGVVAM AGSGKFFVGG NWKCN GTKDS IAKLISDLNS ATLEADV DVV
101 VSPPFVYIDQ VKSSLTDRID ISGQNSWVGK GGAFTGEISV EQLKDLGCKW
151 VILGHSERRH VIGEKDEFIG KKAAYALSEG LGVIACIGEK LEEREAGKTF
201 DVCFAQLKAF ADAVPSWDNI VVAYEPVWAI GTGKVVASPQQ AQEVHVAVRG
251 WLKKNVSEEV ASKTRIIYGG SVNGGNSAEL AKEEDIDGFL VGGASLKGPE
301 FATIVNSVTS KKVAA
```

Show predicted peptides also

Sort Peptides By

Residue Number  Increasing Mass  Decreasing Mass

| Start - End | Observed | Mr (expt) | Mr (calc) | Delta  | Miss | Sequence                                                                    |
|-------------|----------|-----------|-----------|--------|------|-----------------------------------------------------------------------------|
| 131 - 144   | 718.4938 | 1434.9731 | 1434.7355 | 0.2376 | 0    | <b>K.GGAFTGEISVEQLK.D</b> ( <a href="#">Ions score 52</a> )                 |
| 235 - 249   | 540.4000 | 1618.1781 | 1617.8587 | 0.3194 | 0    | <b>K.VASPQQAQEVHVAVR.G</b> ( <a href="#">Ions score 72</a> )                |
| 255 - 263   | 481.8491 | 961.6836  | 961.4716  | 0.2120 | 0    | <b>K.NVSEEVASK.T</b> ( <a href="#">Ions score 57</a> )                      |
| 298 - 311   | 725.9797 | 1449.9449 | 1449.7351 | 0.2098 | 0    | <b>K.GPEFATIVNSVTSK.K</b> Deamidated (NQ) ( <a href="#">Ions score 19</a> ) |

# gi|510880 Putative aspartic protease

## Protein View

Match to: gi|510880 Score: 48

putative aspartic protease [Brassica oleracea]

Found in search of C:\QStar Share Data\20091115MMZ\NOV16\1748NOV15.wiff

Nominal mass ( $M_r$ ): 28008; Calculated pI value: 8.34

NCBI BLAST search of [gi|510880](#) against nr

Unformatted [sequence string](#) for pasting into other applications

Taxonomy: [Brassica oleracea](#)

Fixed modifications: Carbamidomethyl (C)

Variable modifications: Oxidation (M), Phospho (ST)

Cleavage by Trypsin: cuts C-term side of KR unless next residue is P

Sequence Coverage: 3%

Matched peptides shown in **Bold Red**

```
1 MGIYSKPVAV SLIVSFLFL SASAERN DGT FRVGLK LKL DRKSRIAARV
51 GSKQLKPLRG YGLGDSGDAD IVTLKNYLD A QYYGEIAIGT PPQKFTVVFD
101 TGSSNLWVPS SKCYFSIACL FHSKYKSSRS STYEKNGKSA AIHYGTGAIA
151 GFFSNDAVTV GDLVVKDQEF IEATKEPGIT FVLAKFDGIL GLGFQEISVG
201 NAAPVWYNML KQGLYKEPVF SFWLN RNAED EEGGELVFGG VDPNHYKGEH
251 IYVPV
```

Show predicted peptides also

Sort Peptides By

Residue Number  Increasing Mass  Decreasing Mass

| Start - End | Observed | Mr(expt)  | Mr(calc)  | Delta  | Miss | Sequence              |                                   |
|-------------|----------|-----------|-----------|--------|------|-----------------------|-----------------------------------|
| 176 - 185   | 537.8502 | 1073.6859 | 1073.6121 | 0.0738 | 0    | <b>K.EPGITFVLAK.F</b> | ( <a href="#">Ions score 48</a> ) |

## Peptide View

MS/MS Fragmentation of **EPGITFVLAK**

Found in [gi|510880](#), putative aspartic protease [Brassica oleracea]

| #  | b        | b <sup>++</sup> | b <sup>0</sup>  | b <sup>0++</sup> | Seq.     | y               | y <sup>++</sup> | y <sup>*</sup> | y <sup>*++</sup> | y <sup>0</sup>  | y <sup>0++</sup> | #  |
|----|----------|-----------------|-----------------|------------------|----------|-----------------|-----------------|----------------|------------------|-----------------|------------------|----|
| 1  | 130.0499 | 65.5286         | 112.0393        | 56.5233          | <b>E</b> |                 |                 |                |                  |                 |                  | 10 |
| 2  | 227.1026 | 114.0550        | <b>209.0921</b> | 105.0497         | <b>P</b> | <b>945.5768</b> | 473.2920        | 928.5502       | 464.7788         | 927.5662        | 464.2867         | 9  |
| 3  | 284.1241 | 142.5657        | 266.1135        | 133.5604         | <b>G</b> | <b>848.5240</b> | 424.7656        | 831.4975       | 416.2524         | <b>830.5135</b> | 415.7604         | 8  |
| 4  | 397.2082 | 199.1077        | 379.1976        | 190.1024         | <b>I</b> | <b>791.5026</b> | 396.2549        | 774.4760       | 387.7416         | <b>773.4920</b> | 387.2496         | 7  |
| 5  | 498.2558 | 249.6316        | <b>480.2453</b> | 240.6263         | <b>T</b> | <b>678.4185</b> | 339.7129        | 661.3919       | <b>331.1996</b>  | 660.4079        | 330.7076         | 6  |
| 6  | 645.3243 | 323.1658        | 627.3137        | 314.1605         | <b>F</b> | <b>577.3708</b> | 289.1890        | 560.3443       | 280.6758         |                 |                  | 5  |
| 7  | 744.3927 | 372.7000        | 726.3821        | 363.6947         | <b>V</b> | <b>430.3024</b> | 215.6548        | 413.2758       | 207.1416         |                 |                  | 4  |
| 8  | 857.4767 | 429.2420        | 839.4662        | 420.2367         | <b>L</b> | <b>331.2340</b> | 166.1206        | 314.2074       | 157.6074         |                 |                  | 3  |
| 9  | 928.5138 | 464.7606        | 910.5033        | 455.7553         | <b>A</b> | <b>218.1499</b> | 109.5786        | 201.1234       | 101.0653         |                 |                  | 2  |
| 10 |          |                 |                 |                  | <b>K</b> | 147.1128        | 74.0600         | 130.0863       | 65.5468          |                 |                  | 1  |



# gi|1351856 Aconitate hydratase, cytoplasmic

## Protein View

Match to: gi|1351856 Score: 79

RecName: Full=Aconitate hydratase, cytoplasmic; Short=Aconitase; AltName: Full=Citrate hydro-lyase

Found in search of C:\QStar Share Data\20091115MMZ\NOV16\158NOV16.wiff

Nominal mass (M<sub>r</sub>): 98570; Calculated pI value: 5.74

NCBI BLAST search of [gi|1351856](#) against nr

Unformatted [sequence string](#) for pasting into other applications

Fixed modifications: Carbamidomethyl (C)

Variable modifications: Oxidation (M), Phospho (ST)

Cleavage by Trypsin: cuts C-term side of KR unless next residue is P

Sequence Coverage: 2%

Matched peptides shown in **Bold Red**

```
1 MAAENPFKEN LLSLPKPGGG EFGKYYSLPS LNDPRIDRLP YSIRILLESA
51 IRNCDNFQVK KEDVEKIIDW ENSSPKQVEI PFKPARVLLQ DFTGVPVAVD
101 LACMRDAMNK LGSDSNKINP LVPVDLVIDH SVQVDVASE NAVQANMELE
151 FQRNKERFAF LKWSNAFQN MLVPPGSGI VHQVNLEYLG RVVNTSGLL
201 YPDSVVGTDH HTTMIDGLV AGWVGVGIEA EAAMLGQPMV MVLPGVVGFK
251 LSGKLRNGVT ATDLVLTVTQ MLRKHGVVVK FVEFYGDGME ELSLADRATI
301 ANMSPEYGAT MGFFPVDHVT LQYLKLTGRS DETVSMIEAY LRANKMFVDY
351 KEPQQEKVYS SYLQLDLTDV EPCISGPKRP HDRVPLKEMK SDWHACLNDK
401 VGFKGFAIPK EAQENVAKFS FHGQPAELKH GSVVIAAITS CTNTSNPSVM
451 LGAALVAKKA CELGLQVKPW VKTSLAPGSG VVTKYLLKSG LQPYNLQQGF
501 HIVGYGCTTC IGNSGDLDES VSAAISDNDI VAAAVLSGSR NFEGRVHPLT
551 RANYLASPPL VVAYALAGTV DIDFEKEPIG KGKDGKDVYF RDIWPSTEEI
601 AEVVQSSVLP DMFKSTYESI TKGNNPMWNQL SVPSTGLYSW DPNSTYIHEP
651 PYFKNMTMDP PGAGHVKDAY CLLNFGDSIT TDHISPAESI HKDSPAAYKL
701 LERGVDRKDF NSYGSRRGND EVMARGTFAN IRLVKNLLDG EVGPKTVHVP
751 TGEKLSVFEA AEKYKSAGQD TIVLAGAEYG SGSSRDWAAK GPMLLGVKAV
801 IAKSFERIHR SNLVGMGIIP LCFKSGEDAD SLGLTGHERY TIDLDDISK
851 IRPGQDVTVT TDSGKSFTCT VRFDTEVELA YFNNGGILPY VIRNLIKQ
```

Show predicted peptides also

Sort Peptides By

Residue Number  Increasing Mass  Decreasing Mass

| Start - End | Observed | Mr (expt) | Mr (calc) | Delta  | Miss | Sequence                                                  |
|-------------|----------|-----------|-----------|--------|------|-----------------------------------------------------------|
| 473 - 484   | 558.8498 | 1115.6850 | 1115.6187 | 0.0664 | 0    | <b>K.TSLAPGSGVVTK.Y</b> ( <a href="#">Ions score 58</a> ) |
| 709 - 716   | 473.3326 | 944.6507  | 944.3988  | 0.2519 | 0    | <b>K.DFNSYGSR.R</b> ( <a href="#">Ions score 20</a> )     |

# gi|15235763 Cytosol aminopeptidase family protein

Match to: gi|15235763 Score: 212

cytosol aminopeptidase family protein [Arabidopsis thaliana]

Found in search of C:\QStar Share Data\20091115MMZ\NOV15\712NOV15.wiff

Nominal mass ( $M_r$ ): 61667; Calculated pI value: 6.62

NCBI BLAST search of [gi|15235763](#) against nr

Unformatted [sequence string](#) for pasting into other applications

Taxonomy: [Arabidopsis thaliana](#)

Links to retrieve other entries containing this sequence from NCBI Entrez:

[gi|85700452](#) from [Arabidopsis thaliana](#)

Fixed modifications: Carbamidomethyl (C)

Variable modifications: Oxidation (M), Phospho (ST)

Cleavage by Trypsin: cuts C-term side of KR unless next residue is P

Sequence Coverage: 7%

Matched peptides shown in **Bold Red**

```
1 MAVTLVTSFA SSSSRFHFRS FSSSPSSLSS CFVRFQFPSR LRLAFVTPPL
51 YSSSRAMAHT ISHATLGLTQ ANSVDHPKIS FSGKEIDVTE WKGDILAVGV
101 TEKDMAKDVN SKFENPILKK LDAHLGGLLA DVSSEEDFSG KPGQSTVLRL
151 PGLGSKRVGL IGLGKSASTP SAFQSLGEAV AAAAKASQAS SVAVVLASSE
201 SVSNESKLCS ASAIASGTVL GLFEDSRYKS ESKKPSLKSV DIIGFGSGPE
251 LEKKLKYAEH VSYGVIFGKE LVNSPANVLT PAVLAEALN LASMYSVMT
301 ANILNEEQCK ELKMGSYLAV AAASANPPHF IHLIYKPSSG PVKTKLALVG
351 KGLTFDSGGY NIKTGPGLI ELMKFDMGGS AAVLGAAKAI GQIKPPGVEV
401 HFIVAACENM ISGTGMRPGD VLTASNGKTI EVNNTDAEGR LTLADALVYA
451 CNQGVDKVVD LATLTGACII ALGTSMAGIY TPSDKLAKEV IAASERSGEK
501 LWRMPMEESY WEMMKSGVAD MVNTGGRAGG SITAALFLKQ FVSEDVEWMH
551 IDMAGPVVNE KKKAATGFGV ATLVEWVQNH SSS
```

Show predicted peptides also

Sort Peptides By

Residue Number  Increasing Mass  Decreasing Mass

| Start - End | Observed | Mr(expt)  | Mr(calc)  | Delta  | Miss | Sequence                                                            |
|-------------|----------|-----------|-----------|--------|------|---------------------------------------------------------------------|
| 85 - 92     | 510.2915 | 1018.5684 | 1018.4971 | 0.0713 | 0    | K.EIDVTEWK.G ( <a href="#">Ions score 22</a> )                      |
| 93 - 103    | 551.3405 | 1100.6664 | 1100.6077 | 0.0586 | 0    | K.GDILAVGVTEK.D ( <a href="#">Ions score 41</a> )                   |
| 352 - 363   | 636.3537 | 1270.6929 | 1270.6194 | 0.0735 | 0    | K.GLTFDSGGYNIK.T ( <a href="#">Ions score 46</a> )                  |
| 375 - 388   | 655.8469 | 1309.6792 | 1309.6336 | 0.0455 | 0    | K.FDMGSSAAVLGAAK.A Oxidation (M) ( <a href="#">Ions score 104</a> ) |

# gi|195632542 Cytokinin-O-glucosyltransferase 1

## Protein View

Match to: gi|195632542 Score: 47

cytokinin-O-glucosyltransferase 1 [Zea mays]

Found in search of C:\QStar Share Data\20091115MMZ\NOV15\343NOV15.wiff

Nominal mass ( $M_r$ ): 54361; Calculated pI value: 5.59

NCBI BLAST search of [gi|195632542](#) against nr

Unformatted [sequence string](#) for pasting into other applications

Taxonomy: [Zea mays](#)

Fixed modifications: Carbamidomethyl (C)

Variable modifications: Oxidation (M), Phospho (ST)

Cleavage by Trypsin: cuts C-term side of KR unless next residue is P

Sequence Coverage: 1%

Matched peptides shown in **Bold Red**

```
1  MAAAVDTAAV AGATGRLRVF FLPSFIRGHL IPQTDMACRV AAARPAEVEA
51 TVVVTAPANAA LIAPTVARAA AAGHAVRVLC YFPDPVGLGE GVECLATATA
101 RDAWRVYRAM EVVQPSHESL LRDHRPDAIV ADVPFWTTG VAAELGVPRL
151 TFHPVGIFAL LAMNSLFTIR PDIIGRASSD AAGTVLSVPG LPGKEITIPV
201 SELPTFLVQD DHLASKAWQRM RACQLTGFGV IVNTFADLEQ PYCEEFSRVE
251 ARRAYFVGPL GKPSRSTMHR GGSGNADCLS WLSTKPSRSV VFVCFGSWAE
301 FSATQTRELA LGLEASNQPF LWVRSNDSS DDQWAPEGWE QRVANRGLVV
351 HGWAPQLAVL AHPSVGAFVT HCGWNSVLEA ASAGVPVLTW PLVFEQFINE
401 RLATEVAAFG VRLWDGRRS ERAEDAEIVP AEAIARAVAG FMEGGEQRDK
451 LNARAGELAE RARAAVSEGD SSWRDINRLI DDLQARASG LPQMNSVQLE
501
```

Show predicted peptides also

Sort Peptides By

Residue Number  Increasing Mass  Decreasing Mass

| Start - End | Observed | Mr (expt) | Mr (calc) | Delta  | Miss | Sequence      |                                 |
|-------------|----------|-----------|-----------|--------|------|---------------|---------------------------------|
| 455 - 463   | 486.7905 | 971.5665  | 971.5148  | 0.0517 | 1    | R.AGELAERAR.A | <a href="#">(Ions score 47)</a> |
| 455 - 463   | 486.8004 | 971.5862  | 971.5148  | 0.0714 | 1    | R.AGELAERAR.A | <a href="#">(Ions score 47)</a> |

# gi|9757801 3-isopropylmalate dehydrogenase

## Protein View

Match to: gi|9757801 Score: 88

3-isopropylmalate dehydrogenase [Arabidopsis thaliana]

Found in search of D:\Sixue Chen-don't delete please\20091115MMZ\DEC01\1908DEC01.wiff

Nominal mass ( $M_r$ ): 44305; Calculated pI value: 5.75

NCBI BLAST search of [gi|9757801](#) against nr

Unformatted [sequence string](#) for pasting into other applications

Taxonomy: [Arabidopsis thaliana](#)

Fixed modifications: Carbamidomethyl (C)

Variable modifications: Deamidated (NQ), Gln->pyro-Glu (N-term Q), Oxidation (M)

Cleavage by Trypsin: cuts C-term side of KR unless next residue is P

Sequence Coverage: 11%

Matched peptides shown in **Bold Red**

```
1 MAAFLQTNIS LNAIKIVPGK YSSLTDHQFR APYRIRCAAA SPGKKRYNIA
51 LLPGDGIGPE VISVAKNVLQ KAGSLEGLEF DFKEMPVGGG ALDLVGVPLP
101 EETFTAALKS DAILLGAIGG YKWDKNEKHL RPEMALFYLR RDLKVFANLR
151 PATVLPQLVD ASTLKKEVAE GVDMMIVREL TGGIYFGEPR GITINENGEE
201 VGVSTEIYAA HEIDRIARVA FETARKRRGK LCSVDKANVL DASILWRKRV
251 TALASEYPDV ELSHMYVDNA AMQLIRDPKQ FDTIVTNNIF GDILSDEASM
301 ITGSIGMLPS ASLGESGPGI FEPIHGSAPD IAGQDKANPL ATILSAAMLL
351 KYGLGEEKAA KRIEDAVVDA LNKGFRTGDI YSPGNKLVGC KEMGEEVLKS
401 VESKVPATV
```

Show predicted peptides also

Sort Peptides By

Residue Number  Increasing Mass  Decreasing Mass

| Start - End | Observed  | Mr (expt) | Mr (calc) | Delta  | Miss | Sequence                                                        |
|-------------|-----------|-----------|-----------|--------|------|-----------------------------------------------------------------|
| 47 - 66     | 1013.6636 | 2025.3127 | 2025.1146 | 0.1980 | 0    | R.YNIALLPGDGIGGPEVISVAK.N ( <a href="#">Ions score 27</a> )     |
| 191 - 215   | 906.1869  | 2715.5390 | 2715.2987 | 0.2403 | 0    | R.GITINENGEEVGVSTEIYAAHEIDR.I ( <a href="#">Ions score 61</a> ) |

# gi|15221044 Dihydrolipoamide dehydrogenase 1, mitochondrial

Match to: gi|15221044 Score: 141

dihydrolipoamide dehydrogenase 1, mitochondrial / lipoamide dehydrogenase 1 (MTPD1) [Arabidopsis thaliana]  
Found in search of C:\QStar Share Data\20091115MMZ\NOV15\753NOV15.wiff

Nominal mass ( $M_r$ ): 54239; Calculated pI value: 6.96

NCBI BLAST search of [gi|15221044](#) against nr

Unformatted [sequence string](#) for pasting into other applications

Taxonomy: [Arabidopsis thaliana](#)

Links to retrieve other entries containing this sequence from NCBI Entrez:

[gi|30694221](#) from [Arabidopsis thaliana](#)

[gi|75264759](#) from [Arabidopsis thaliana](#)

[gi|12323085](#) from [Arabidopsis thaliana](#)

[gi|12704696](#) from [Arabidopsis thaliana](#)

Fixed modifications: Carbamidomethyl (C)

Variable modifications: Oxidation (M), Phospho (ST)

Cleavage by Trypsin: cuts C-term side of KR unless next residue is P

Sequence Coverage: 6%

Matched peptides shown in **Bold Red**

```
1 MAMASLARRK AYFLTRNLSN SPTDALRFSF SLSRGFASSG SDENDVVIIG
51 GPPGGYVAAI KASQLGLKTT CIEKRGALGG TCLNVGCIPS KALLHSSHMY
101 HEAKHSFANH GIKVSSVEVD LPAMLAQKDN AVKNLIRGIE GLFKKNKVTY
151 VKGYGKFISP NEVSVETIDG GNTIVKQKHI IVATGSDVKS LPGITIDEKK
201 IVSSTGALS SEVPKKLIVI GAGYIGLEMG SVWGRLGSEV TVVEFAGDIV
251 PSMDEIRKQ FQRSLKQKM KFMLKTKVVS VDSSSDGVKL TVEPAEGGEQ
301 SILEADVVLV SAGRTPFTSG LDLEKIGVET DKAGRILVND RFLSNVPGVY
351 AIGDVIPGPM LAHKAEDGV ACVEFIAGKH GHVDYDKVPG VVYTHPEVAS
401 VGKTEEQLKK EGVSYRVGKF PFMANSRAKA IDNAEGLVKI LADKETDKIL
451 GVHIMAPNAG ELIHEAVLAI NYDASSEDIA RVCHAHPTMS EALKEAAMAT
501 YDKPIHI
```

Show predicted peptides also

Sort Peptides By

Residue Number  Increasing Mass  Decreasing Mass

| Start - End | Observed | Mr(expt)  | Mr(calc)  | Delta  | Miss | Sequence                                                 |
|-------------|----------|-----------|-----------|--------|------|----------------------------------------------------------|
| 190 - 199   | 536.8258 | 1071.6370 | 1071.5812 | 0.0559 | 0    | <b>K.SLPGITIDEK.K</b> ( <a href="#">Ions score 56</a> )  |
| 315 - 325   | 604.3467 | 1206.6788 | 1206.6132 | 0.0656 | 0    | <b>R.TPFTSGLDLEK.I</b> ( <a href="#">Ions score 39</a> ) |
| 430 - 439   | 515.3155 | 1028.6164 | 1028.5502 | 0.0662 | 0    | <b>K.AIDNAEGLVK.I</b> ( <a href="#">Ions score 46</a> )  |

# gi|9755610 Reversibly glycosylated polypeptide-2 (AtRGB)

## Protein View

Match to: gi|9755610 Score: 78

reversibly glycosylated polypeptide-2 (AtRGB) [Arabidopsis thaliana]

Found in search of C:\QStar Share Data\20091115MMZ\NOV26\1378NOV26.wiff

Nominal mass ( $M_r$ ): 41377; Calculated pI value: 5.76

NCBI BLAST search of [gi|9755610](#) against nr

Unformatted [sequence string](#) for pasting into other applications

Taxonomy: [Arabidopsis thaliana](#)

Fixed modifications: Carbamidomethyl (C)

Variable modifications: Deamidated (NQ), Gln->pyro-Glu (N-term Q), Oxidation (M)

Cleavage by Trypsin: cuts C-term side of KR unless next residue is P

Sequence Coverage: 5%

Matched peptides shown in **Bold Red**

```
1 MVEPANTVGL PVNPTPLKLD ELDIVIPTIR NLDLFLEMWRP FLQPYHLIIV
51 QDGDPSKKIH VPEGYDYELY NRNDINRILG PKASCISFKD SACRCFGYMV
101 SKKKYIFTID DDCFVAKDPS GKAVNALEQH IKNLLCPSSP FFFNTLYDPY
151 REGADFVRGY PFSLREGVST AVSHGLWLNI PDYDAPTQLV KPKERNTRYV
201 DAVMTIPKGT LFPMCGMNLA FDRDLIGPAM YFGLMGDQGP IGRYDDMWAG
251 WCIKVICDHL SLGVKTGLPY IYHSKASNPF VNLKKEYKGI FWQEEIIPFF
301 QNAKLSKEAV TVQQCYIELS KMVKEKLSSL DPYFDKLADA MVTWIEAWDE
351 LNPPAASGKA
```

Show predicted peptides also

Sort Peptides By

Residue Number  Increasing Mass  Decreasing Mass

| Start - End | Observed | Mr (expt) | Mr (calc) | Delta  | Miss | Sequence              |                                                 |
|-------------|----------|-----------|-----------|--------|------|-----------------------|-------------------------------------------------|
| 199 - 208   | 576.8799 | 1151.7453 | 1151.5896 | 0.1557 | 0    | <b>R.YVDAVMTIPK.G</b> | Oxidation (M) ( <a href="#">Ions score 35</a> ) |
| 327 - 336   | 592.8789 | 1183.7433 | 1183.5761 | 0.1672 | 0    | <b>K.LSSLDPYFDK.L</b> | ( <a href="#">Ions score 43</a> )               |

# gi|1710838 S-adenosyl-L-homocysteine hydrolase

## Protein View

Match to: gi|1710838 Score: 252

RecName: Full=Adenosylhomocysteinase; Short=AdoHcyase; AltName: Full=S-adenosyl-L-homocysteine hydrolase

Found in search of C:\QStar Share Data\20091115MMZ\NOV16\842NOV16.wiff

Nominal mass (M<sub>r</sub>): 53744; Calculated pI value: 5.69

NCBI BLAST search of [gi|1710838](#) against nr

Unformatted [sequence string](#) for pasting into other applications

Taxonomy: [Medicago sativa](#)

Links to retrieve other entries containing this sequence from NCBI Entrez:

[gi|535584](#) from [Medicago sativa](#)

Fixed modifications: Carbamidomethyl (C)

Variable modifications: Oxidation (M), Phospho (ST)

Cleavage by Trypsin: cuts C-term side of KR unless next residue is P

Sequence Coverage: 8%

Matched peptides shown in **Bold Red**

```
1 MALLVETTT GREYKVKDMS QADFGRLIE LAEVEMPLM SCRTEFGPSQ
51 PFKGARITGS LHMTIQTAVL IETLTALGAE VRWCSCNIFS TQDHAAAAIA
101 RDSAAVFAWK GETLQEYWWC SERALDWGPG GGPDLIVDDG GDVTLIIHEG
151 VKAEEVFEEK GQLPDPSSD NAEMQIVLTI IRDGLKTDPK RYQKMKTRIV
201 GVSEETTTGV KRLYQMQASG TLLFPAINVN DSVTKSKFDN LYGCRHSLPD
251 GLMRATDVM I AGKVAVVCGY GDVGGKCAAA LKQGGARVIV TEIDPICALQ
301 ALMEGLQVLT LEDVISEADI FVTTTGNKDI IMVSDMKMK NNAIVCNIGH
351 FDNEIDMHGL ETYPGVKRIT IKPQTDRWVF PETKSGIIVL AEGRLMNLGC
401 ATGHPSFVMS CSFTNQVIAQ IELWKEKTSG KYEKKVYVLP KHLDEKVAAL
451 HLGQLGAKLT KLSKDQADYI SVPVEGPYKP AHYRY
```

Show predicted peptides also

Sort Peptides By

Residue Number  Increasing Mass  Decreasing Mass

| Start - End | Observed | Mr (expt) | Mr (calc) | Delta  | Miss | Sequence                                                   |
|-------------|----------|-----------|-----------|--------|------|------------------------------------------------------------|
| 44 - 53     | 569.3139 | 1136.6133 | 1136.5502 | 0.0631 | 0    | <b>R.TEFGPSQPFK.G</b> ( <a href="#">Ions score 19</a> )    |
| 102 - 110   | 497.7843 | 993.5540  | 993.4920  | 0.0621 | 0    | <b>R.DSAAVFAWK.G</b> ( <a href="#">Ions score 52</a> )     |
| 199 - 211   | 660.3703 | 1318.7260 | 1318.6980 | 0.0280 | 0    | <b>R.IVGVSEETTTGVK.R</b> ( <a href="#">Ions score 81</a> ) |
| 385 - 394   | 507.8339 | 1013.6533 | 1013.5869 | 0.0664 | 0    | <b>K.SGIIVLAEGR.L</b> ( <a href="#">Ions score 100</a> )   |

# gi|15223574 Isoflavone reductase, putative

## Protein View

Match to: gi|15223574 Score: 112

isoflavone reductase, putative [Arabidopsis thaliana]

Found in search of D:\Sixue Chen-don't delete please\20091115MMZ\DEC01\1791.wiff

Nominal mass ( $M_r$ ): 34515; Calculated pI value: 5.44

NCBI BLAST search of [gi|15223574](#) against nr

Unformatted [sequence string](#) for pasting into other applications

Taxonomy: [Arabidopsis thaliana](#)

Fixed modifications: Carbamidomethyl (C)

Variable modifications: Deamidated (NQ), Gln->pyro-Glu (N-term Q), Oxidation (M)

Cleavage by Trypsin: cuts C-term side of KR unless next residue is P

Sequence Coverage: 7%

Matched peptides shown in **Bold Red**

```
1 MTSKILVIGA TGLIGKVLVE ESAKSGHATF ALVREASLSD PVKAQLVERF
51 KDLGVTILYG SLSDKESLVK AIKQVDVVIS AVGRFQTEIL NQTNIIDAIK
101 ESGNVKRFLP SEFGNDVDRT VAIEPTLSEF ITKAQIRRAI EAAKIPYTYV
151 VSGCFAGLFV PCLGQCHLRL RSPPRDKVSI YDTGNGKAIV NTEEDIVAYT
201 LKAVDPRTL NKILYIHPPN YIVSQNDMVG LWEEKIGKTL EKTYVSEEL
251 LKTIQESKPP MDFLVGLIHT ILVKSDFTSF TIDPSFGVEA SELYPEVKYT
301 SVDEFLNRFI
```

Show predicted peptides also

Sort Peptides By

Residue Number  Increasing Mass  Decreasing Mass

| Start - End | Observed | Mr(expt)  | Mr(calc)  | Delta  | Miss | Sequence                                                  |
|-------------|----------|-----------|-----------|--------|------|-----------------------------------------------------------|
| 108 - 119   | 698.4615 | 1394.9085 | 1394.6467 | 0.2618 | 0    | <b>R.FLPSEFGNDVDR.T</b> ( <a href="#">Ions score 75</a> ) |
| 243 - 252   | 605.9390 | 1209.8634 | 1209.6129 | 0.2505 | 0    | <b>K.TYVSEELLK.T</b> ( <a href="#">Ions score 37</a> )    |



# gi|15242822 Glutamate-1-semialdehyde-2,1-aminomutase (GSA1)

## Protein View

Match to: gi|15242822 Score: 211

GSA1 (GLUTAMATE-1-SEMIALDEHYDE-2,1-AMINOMUTASE); glutamate-1-semialdehyde 2,1-aminomutase [Arabidopsis thaliana]

Found in search of C:\QStar Share Data\20091115MMZ\NOV17\1189NOV17.wiff

Nominal mass ( $M_r$ ): 50737; Calculated pI value: 6.43

NCBI BLAST search of [gi|15242822](#) against nr

Unformatted [sequence string](#) for pasting into other applications

Fixed modifications: Carbamidomethyl (C)

Variable modifications: Oxidation (M), Phospho (ST)

Cleavage by Trypsin: cuts C-term side of KR unless next residue is P

Sequence Coverage: 12%

Matched peptides shown in **Bold Red**

```
1 MSATLTGSGT ALGFSCSSKI SKRVSSSPAS NRCCIKMSVS VDEKKKSFSL
51 QKSEEA FNAA KNLMPGGVNS PVRAFKSVGG QPVLIDSVKG SKMWDIDGNE
101 YIDYVGSWGP AIIGHADDEV LAALAETMKK GTSFGAPCLL ENVLAEMVIS
151 AVPSIEMVRF VNSGTEACMG VLRLARAFTN KEKFIKFEFC YHG HANAFLV
201 KAGSGVATLG LPDSPGVPKA ATSDTLTAPY NDLEAVEKLF AAHKGEISAV
251 ILEPVVGNNG FIPPTPEFIN GLRQLTKDNG VLLIFDEVMT GFRLAYGGAQ
301 EYFGITPDLT TLGKIIGGL PVGAYGGRD IMEMVAPAGP MYQAGTLSGN
351 PLAMTAGIHT LKRLKQAGTY EYLDKITKEL TNGILEAGKK TGHMCGGYI
401 SGMFGFFFAE GPVYNFADSK KSDTEKFGRF FRGMLEEGVY FAPSQFEAGF
451 TSLAHTPEDI QLTIAAAERV LSRI
```

Show predicted peptides also

Sort Peptides By

Residue Number  Increasing Mass  Decreasing Mass

| Start - End | Observed | Mr (expt) | Mr (calc) | Delta  | Miss | Sequence                                                                |
|-------------|----------|-----------|-----------|--------|------|-------------------------------------------------------------------------|
| 62 - 73     | 628.8537 | 1255.6929 | 1255.6343 | 0.0585 | 0    | <b>K.NLMPGGVNSPVR.A</b> Oxidation (M) ( <a href="#">Ions score 57</a> ) |
| 77 - 89     | 649.9043 | 1297.7941 | 1297.7242 | 0.0699 | 0    | <b>K.SVGGQPVLIDSVK.G</b> ( <a href="#">Ions score 71</a> )              |
| 202 - 219   | 811.9660 | 1621.9175 | 1621.8676 | 0.0499 | 0    | <b>K.AGSGVATLGLDSPGVPK.A</b> ( <a href="#">Ions score 44</a> )          |
| 315 - 328   | 643.8869 | 1285.7592 | 1285.7143 | 0.0449 | 0    | <b>K.IIGGLPVGAYGGR.R</b> ( <a href="#">Ions score 40</a> )              |

# gi|15226618 Fumarate hydratase (FUM1)

## Protein View

Match to: gi|15226618 Score: 102

FUM1 (FUMARASE 1); fumarate hydratase [Arabidopsis thaliana]

Found in search of C:\QStar Share Data\20091115MMZ\NOV15\1102NOV15.wiff

Nominal mass ( $M_r$ ): 53479; Calculated pI value: 8.01

NCBI BLAST search of [gi|15226618](#) against nr

Unformatted [sequence string](#) for pasting into other applications

Taxonomy: [Arabidopsis thaliana](#)

Fixed modifications: Carbamidomethyl (C)

Variable modifications: Oxidation (M), Phospho (ST)

Cleavage by Trypsin: cuts C-term side of KR unless next residue is P

Sequence Coverage: 4%

Matched peptides shown in **Bold Red**

```
1 MSIIYVASRRL SGGTTVTALR YATSLRSYST SFREERDTFG PIQVPSDKLW
51 GAQTQRSLQN FEIGGERERM PEPIVRAFGV LKKCAAKVNM EYGLDPTIGK
101 AIMQAAQEVA EGKLNDFHPL VVWQTGSGTQ SNMNANEVIA NRAAEILGRK
151 RGEKCVHPND HVNRSQSSND TFPTVMHIAA ATEINSRLIP SLKTLHSTLE
201 SKSFEFKDIV KIGRTHQDA TPLTLGQEFQ GYATQVKYGL NRVTCTLPRL
251 YQLAQGGTAV GTGLNTHKGF DVKIAAAVAE ETNLPFVTAE NKFEALAAHD
301 ACVETSGSLN TIATSLMKIA NDIRFLGSGP RCGLGELVLP ENEPGSSIMP
351 GKNVPTQCEA LTMVCAQVMG NHVAVTVGGG NGHFELNVFK PVIASALLHS
401 VRLIADASAS FEKNCVIRGIE ANRERISKLL HESLMLVTSL NPKIGYDNAA
451 AVAKKAHKEG CTLKEAALNL GVLTAEEFDT LVVPEKMIGP SD
```

Show predicted peptides also

Sort Peptides By

Residue Number  Increasing Mass  Decreasing Mass

| Start - End | Observed | Mr (expt) | Mr (calc) | Delta  | Miss | Sequence                          |                                   |
|-------------|----------|-----------|-----------|--------|------|-----------------------------------|-----------------------------------|
| 57 - 67     | 625.3436 | 1248.6727 | 1248.6098 | 0.0628 | 0    | R.SLQN <b>FEIGGER</b> .E          | ( <a href="#">Ions score 39</a> ) |
| 444 - 454   | 546.8217 | 1091.6288 | 1091.5611 | 0.0677 | 0    | K. <b>IGYD</b> NAA <b>AVAK</b> .K | ( <a href="#">Ions score 63</a> ) |

# gi|461461 Enoyl-[acyl-carrier-protein] reductase [NADH], chloroplastic

## Protein View

Match to: gi|461461 Score: 191

RecName: Full=Enoyl-[acyl-carrier-protein] reductase [NADH], chloroplastic; AltName: Full=NADH-dependent enoyl-ACP reductase;  
Found in search of D:\Sixue Chen-don't delete please\20091115MMZ\DEC01\1791.wiff

Nominal mass ( $M_r$ ): 40625; Calculated pI value: 8.78

NCBI BLAST search of [gi|461461](#) against nr

Unformatted [sequence string](#) for pasting into other applications

Taxonomy: [Brassica napus](#)

Fixed modifications: Carbamidomethyl (C)

Variable modifications: Deamidated (NQ),Gln->pyro-Glu (N-term Q),Oxidation (M)

Cleavage by Trypsin: cuts C-term side of KR unless next residue is P

Sequence Coverage: 11%

Matched peptides shown in **Bold Red**

```
1 MAATAAASSL QMATTRPSIS AASSKARTYV VGANPRNAYK IACTPHLSNL
51 GCLRNDALP ASKKSFSFST KAMSESESK ASSGLPIDLR GKRAFIAGIA
101 DDNGYGWAVA KSLAAAGAEI LVGTWVPALN IFETSLRRGK FDQSRVLPDG
151 SLMEIKKVYP LDAVFDNPED VPEDVKANKR YAGSSNWTVQ EAAECVRQDF
201 GSIDILVHSL ANGPEVSKPL LETSRKGYLA AISASSYSFV SLLSHFLPIM
251 NPGGASISLT YIASERIIIPG YGGGMSSAKA ALES DTRVLA FEAGRKQNR
301 VNTISAGPLG SRAAKAIGFI DTMI EYSYNN APIQKILTAD EVGNAAAFLV
351 SPLASAITGA TIYVDNGLNS MGVALDSPVF KDLNK
```

Show predicted peptides also

Sort Peptides By

Residue Number  Increasing Mass  Decreasing Mass

| Start - End | Observed | Mr(expt)  | Mr(calc)  | Delta  | Miss | Sequence                                                                       |
|-------------|----------|-----------|-----------|--------|------|--------------------------------------------------------------------------------|
| 81 - 90     | 514.8900 | 1027.7654 | 1027.5662 | 0.1992 | 0    | <b>K.ASSGLPIDLR.G</b> ( <a href="#">Ions score 55</a> )                        |
| 146 - 156   | 609.4493 | 1216.8841 | 1216.6373 | 0.2468 | 0    | <b>R.VLPDGS</b> <b>LMEIK.K</b> Oxidation (M) ( <a href="#">Ions score 42</a> ) |
| 267 - 279   | 627.4328 | 1252.8511 | 1252.6122 | 0.2390 | 0    | <b>R.IIPGYGGGMSSAK.A</b> Oxidation (M) ( <a href="#">Ions score 57</a> )       |
| 301 - 312   | 586.4401 | 1170.8657 | 1170.6357 | 0.2300 | 0    | <b>R.VNTISAGPLGSR.A</b> ( <a href="#">Ions score 37</a> )                      |

# gi|5881963 Dihydrolipoamide S-acetyltransferase

## Protein View

Match to: gi|5881963 Score: 64  
dihydrolipoamide S-acetyltransferase [Arabidopsis thaliana]  
Found in search of C:\QStar Share Data\20091115MM2\NOV26\1001NOV26.wiff

Nominal mass ( $M_r$ ): 50106; Calculated pI value: 8.33  
NCBI BLAST search of [gi|5881963](#) against nr  
Unformatted [sequence string](#) for pasting into other applications

Taxonomy: [Arabidopsis thaliana](#)

Fixed modifications: Carbamidomethyl (C)  
Variable modifications: Deamidated (NQ),Gln->pyro-Glu (N-term Q),Oxidation (M)  
Cleavage by Trypsin: cuts C-term side of KR unless next residue is P  
Sequence Coverage: 6%

Matched peptides shown in **Bold Red**

```
1 MAVSSSSFLS TASLTNSKSN ISFASSVSPS LRSVVFRSTT PATSHRRSMT
51 VRSKIREIFM PALSSTMTEG KIVSWIKTEG EKLAGESVV VVESDKADMD
101 VETFYDGYLA AIVVGEGETA PVGAAIGLLA ETEAEIEEAK SKAASKSSSS
151 VAEAVVPSPV PVTSSPAPAI AQPAPVTAVS DGPRKTVATP YAKKLAKQHK
201 VDIESVAGTG PFGRITASDV ETAAGIAPSK SSIAPPPPPP PPVTAKATT
251 NLPPLLPDSS IVPFTAMQSA VSKNMIESLS VPTFRVGYPV NTDALDALYE
301 KVKPKGVTMT ALLAKAAGMA LAQHPVNVAS CKDGKSFSYN SSINIAVAVA
351 INGGLITPVL QDADKLDLYL LSQKWKELVG KARSKQLQPH EYNSGFTFLS
401 NLGMFGVDRF DAILPPGQGA IMAVGASKPT VVADKDGFFS VKNTMLVNV
451 ADHRIVYGAD LAAFLQTFAK ILENPDSLTL
```

Show predicted peptides also

Sort Peptides By

Residue Number  Increasing Mass  Decreasing Mass

| Start - End | Observed | Mr (expt) | Mr (calc) | Delta  | Miss | Sequence                                                              |
|-------------|----------|-----------|-----------|--------|------|-----------------------------------------------------------------------|
| 57 - 71     | 837.4634 | 1672.9122 | 1672.7688 | 0.1434 | 0    | R.EIFMPALSSTMTEGK.I 2 Oxidation (M) ( <a href="#">Ions score 21</a> ) |
| 286 - 301   | 884.5085 | 1767.0025 | 1766.8727 | 0.1298 | 0    | R.VGYPVNTDALDALYEK.V ( <a href="#">Ions score 43</a> )                |

# gi|7329685 Transketolase-like protein

## Protein View

Match to: gi|7329685 Score: 280

transketolase-like protein [Arabidopsis thaliana]

Found in search of D:\Sixue Chen-don't delete please\20091115MMZ\NOV28\374NOV28.wiff

Nominal mass ( $M_r$ ): 81937; Calculated pI value: 5.80

NCBI BLAST search of [gi|7329685](#) against nr

Unformatted [sequence string](#) for pasting into other applications

Taxonomy: [Arabidopsis thaliana](#)

Fixed modifications: Carbamidomethyl (C)

Variable modifications: Deamidated (NQ),Gln->pyro-Glu (N-term Q),mBBr (C),Oxidation (M)

Cleavage by Trypsin: cuts C-term side of KR unless next residue is P

Sequence Coverage: 6%

Matched peptides shown in **Bold Red**

```
1 MASTSSLALS QALLARAISH HGSDQRGSLP AFSGLKSTGS RASASSRRRI
51 AQSMTKNRSL RPLVRAAAVE TVEPTDSSI VDKSVNSIRF LAIDAVEKAK
101 SGHPGLPMGC APMAHILYDE VMRYNPKNPY WFNDRDFVLS AGHGCMLLYA
151 LLHLAGYDSV QEEDLKQFRQ WSKTPGHPE NFETPGIEVT TGPLGQGIAN
201 AVGLALAEKH LAARFNKPPA EVVDHYTYAI LGDGCQMEGI SNEACSLAGH
251 WGLGKLIIFY DDNHISIDGD TEIAFTENVD QRFEALGWHV IWVKNNGNTGY
301 DEIRAAIKEA KTVIDKPTLI KVTTTIGYGS PNKANSYSVH GAALGEKEVE
351 ATRNNLGWPY EPFQVPDDVK SCLDDLLFDL HFSSHWSRHT PEGATLESBW
401 SAKFAAYEKK YPEEASELKS IITGELPAGW EKALPTYTPE SPGDATRNLNLS
451 QQCLNALAKV VPGFLGGSAD LASSNMILLK AFGDFQKATP EERNLRFVGR
501 EHGMAICNG IALHSPGLIP YCATFFVFTD YMRGAMRISA LSEAGVIYVM
551 THDSIGLGED GPTHQPIEHI ASFRAMPNTL MFRPADGNET AGAYKIAVTK
601 RKTPSILALS RQKLPHLPGT SIEGVEKGGY TISDDSSGNK PDVILIGTGS
651 ELEIAAQAAE VLRKDGKTVR VVSFVCWELF DEQSDEYKES VLPDVSARV
701 SIEAASTFGW GKIVGGKGS IGINSFGASA PAPLLYKEFG ITVEAVVDAA
751 KSFF
```

| Start - End | Observed | Mr(expt)  | Mr(calc)  | Delta  | Miss | Sequence                                                         |
|-------------|----------|-----------|-----------|--------|------|------------------------------------------------------------------|
| 90 - 98     | 503.3773 | 1004.7400 | 1004.5542 | 0.1858 | 0    | R.FLAIDAVEK.A ( <a href="#">Ions score 37</a> )                  |
| 295 - 304   | 570.3582 | 1138.7019 | 1138.4891 | 0.2129 | 0    | K.NGNTGYDEIR.A Deamidated (NQ) ( <a href="#">Ions score 78</a> ) |
| 322 - 333   | 619.4190 | 1236.8235 | 1236.6350 | 0.1884 | 0    | K.VTTTIGYGSPNK.A ( <a href="#">Ions score 86</a> )               |
| 433 - 447   | 788.4915 | 1574.9685 | 1574.7576 | 0.2109 | 0    | K.ALPTYTPESPGDATR.N ( <a href="#">Ions score 80</a> )            |

# gi|7385217 Beta-ketoacyl-ACP synthetase 1

## Protein View

Match to: gi|7385217 Score: 168

beta-ketoacyl-ACP synthetase 1 [Brassica napus]

Found in search of C:\QStar Share Data\20091115MMZ\NOV15\1140NOV15.wiff

Nominal mass ( $M_r$ ): 32334; Calculated pI value: 9.47

NCBI BLAST search of [gi|7385217](#) against nr

Unformatted [sequence string](#) for pasting into other applications

Taxonomy: [Brassica napus](#)

Fixed modifications: Carbamidomethyl (C)

Variable modifications: Oxidation (M), Phospho (ST)

Cleavage by Trypsin: cuts C-term side of KR unless next residue is P

Sequence Coverage: 8%

Matched peptides shown in **Bold Red**

```
1 MQALQSSSLR ASPNPRLRTP SNRQSHQITN ARPTTRRSFI SASASVSAPK
51 RETDPKRVV ITGMGLVSVF GNDVDAYYEK LLSGESGISL IDRFDASKFP
101 TRFGGQIRGF SSEGYIDGKN ERRLDDCLKY CIVAGKKALE SANLGGDKLN
151 TIDKQKAGVL VGTGMGGLTV FSDGVQALVE KGHRRISPPF IPYAITNMGS
201 ALLAIDLGLM GPNYSISTAC ATSNYCFYAA ANHIRRGEAD MMVAGGTEAA
251 IIPIGWEVLL LVGHCRREMM TLKRLQGHGI NREMALSWK ELVFW
```

Show predicted peptides also

Sort Peptides By

Residue Number  Increasing Mass  Decreasing Mass

| Start - End | Observed | Mr(expt)  | Mr(calc)  | Delta  | Miss | Sequence                                                    |
|-------------|----------|-----------|-----------|--------|------|-------------------------------------------------------------|
| 81 - 93     | 680.3881 | 1358.7617 | 1358.7405 | 0.0212 | 0    | <b>K.LLSGESGISLIDR.F</b> ( <a href="#">Ions score 107</a> ) |
| 109 - 119   | 580.2945 | 1158.5744 | 1158.5193 | 0.0551 | 0    | <b>R.GFSSEGYIDGK.N</b> ( <a href="#">Ions score 61</a> )    |

# gi|7671449 Oligopeptidase A-like protein

## Protein View

Match to: gi|7671449 Score: 63

oligopeptidase A-like protein [Arabidopsis thaliana]

Found in search of C:\QStar Share Data\20091115MMZ\NOV15\370NOV15.wiff

Nominal mass ( $M_r$ ): 81777; Calculated pI value: 5.39

NCBI BLAST search of [gi|7671449](#) against nr

Unformatted [sequence string](#) for pasting into other applications

Taxonomy: [Arabidopsis thaliana](#)

Fixed modifications: Carbamidomethyl (C)

Variable modifications: Oxidation (M), Phospho (ST)

Cleavage by Trypsin: cuts C-term side of KR unless next residue is P

Sequence Coverage: 1%

Matched peptides shown in **Bold Red**

```
1 MASEDTLSSN PLLQNFDFFP FDSVDAHHRV PGIRALLQQL EAELEQLEKA
51 VEPSWPKLVE PLEKIIDRLS VVWGMINHLK AVKDTPELRA AIEEVQDSFS
101 CFPNNTFIYT LQPEKVKFQL RLGQSKPIYN AFKAIRESPD WNSLSEAPQI
151 KEAVLSGIAL EDDKREEFNK IEQELEKLSH KFSENVLDAT KKFEKLITDK
201 KEIEGLPPSA LGLFAQAQAVS KGHETATADT GPWLITLDAP SYLPVMQHAK
251 NRALREEVYR AYLSRASSGD LDNTAIIDQI LKLRLEKAKL LGYRNYAEVS
301 MATKMATVEK ADELLEKLR ASWDPVQDI EDLKSFAKNQ GAAEADSLTH
351 WDITFWSERL RESKYDINEE ELRPYFSLPK VMDALFGLAK TLFGIDVVPA
401 DGVAPVWNSD VRFYCVKDS GNPTAYFYFD PYSRPSEKRD GAWMDEVFSR
451 SRVMAQKGS VRLPVAQMVC NQTPPVGDKP SLMTFREVET VFHEFGHALQ
501 HMLTKEDEGL VAGIRNIEWD AVELPSQFME NWCYHRDTLM SIAKHYQTGE
551 TLPENVYKKL LAARTFRAGS LSLRQLKFAT VDLELHTKYM PPGAETIYEV
601 DQRVSIKTQV IPPLPEDRFL CSFSHIFAVC FTCSPSHVLS GGYAAGYYSY
651 KWAEVLSADA FSAFEDAGLD DIKAVKETGQ RFRNTILALG G GKAPLKVFV
701 EFRGREPSPE PLLRHNGLLA ASA
```

Show predicted peptides also

Sort Peptides By

Residue Number  Increasing Mass  Decreasing Mass

| Start - End | Observed | Mr(expt)  | Mr(calc)  | Delta  | Miss | Sequence                                                |
|-------------|----------|-----------|-----------|--------|------|---------------------------------------------------------|
| 182 - 191   | 562.3165 | 1122.6184 | 1122.5557 | 0.0627 | 0    | <b>K.FSENVLDATK.K</b> ( <a href="#">Ions score 63</a> ) |

## Peptide View

MS/MS Fragmentation of **FSENVLDATK**

Found in [gi|7671449](#), oligopeptidase A-like protein [Arabidopsis thaliana]

| #  | b               | b <sup>++</sup> | b <sup>*</sup> | b <sup>*++</sup> | b <sup>0</sup>  | b <sup>0++</sup> | Seq.     | y               | y <sup>++</sup> | y <sup>*</sup> | y <sup>*++</sup> | y <sup>0</sup> | y <sup>0++</sup> | #  |
|----|-----------------|-----------------|----------------|------------------|-----------------|------------------|----------|-----------------|-----------------|----------------|------------------|----------------|------------------|----|
| 1  | 148.0757        | 74.5415         |                |                  |                 |                  | <b>F</b> |                 |                 |                |                  |                |                  | 10 |
| 2  | <b>235.1077</b> | 118.0575        |                |                  | <b>217.0972</b> | 109.0522         | <b>S</b> | <b>976.4946</b> | 488.7509        | 959.4680       | 480.2376         | 958.4840       | 479.7456         | 9  |
| 3  | 364.1503        | 182.5788        |                |                  | 346.1397        | 173.5735         | <b>E</b> | <b>889.4625</b> | 445.2349        | 872.4360       | 436.7216         | 871.4520       | 436.2296         | 8  |
| 4  | 478.1932        | 239.6003        | 461.1667       | 231.0870         | 460.1827        | 230.5950         | <b>N</b> | <b>760.4199</b> | 380.7136        | 743.3934       | 372.2003         | 742.4094       | 371.7083         | 7  |
| 5  | 577.2617        | 289.1345        | 560.2351       | 280.6212         | 559.2511        | 280.1292         | <b>V</b> | <b>646.3770</b> | 323.6921        | 629.3505       | 315.1789         | 628.3665       | 314.6869         | 6  |
| 6  | 690.3457        | 345.6765        | 673.3192       | 337.1632         | 672.3352        | 336.6712         | <b>L</b> | <b>547.3086</b> | 274.1579        | 530.2821       | 265.6447         | 529.2980       | 265.1527         | 5  |
| 7  | 805.3727        | 403.1900        | 788.3461       | 394.6767         | 787.3621        | 394.1847         | <b>D</b> | <b>434.2245</b> | 217.6159        | 417.1980       | 209.1026         | 416.2140       | 208.6106         | 4  |
| 8  | 876.4098        | 438.7085        | 859.3832       | <b>430.1952</b>  | 858.3992        | 429.7032         | <b>A</b> | <b>319.1976</b> | 160.1024        | 302.1710       | 151.5892         | 301.1870       | 151.0972         | 3  |
| 9  | 977.4575        | 489.2324        | 960.4309       | 480.7191         | 959.4469        | 480.2271         | <b>T</b> | <b>248.1605</b> | 124.5839        | 231.1339       | 116.0706         | 230.1499       | 115.5786         | 2  |
| 10 |                 |                 |                |                  |                 |                  | <b>K</b> | 147.1128        | 74.0600         | 130.0863       | 65.5468          |                |                  | 1  |



# gi|7688095 ADP-glucose pyrophosphorylase small subunit

## Protein View

Match to: gi|7688095 Score: 182

ADP-glucose pyrophosphorylase small subunit [Brassica napus]

Found in search of C:\QStar Share Data\20091115MMZ\NOV26\1006NOV26.wiff

Nominal mass ( $M_r$ ): 57294; Calculated pI value: 5.87

NCBI BLAST search of [gi|7688095](#) against nr

Unformatted [sequence string](#) for pasting into other applications

Taxonomy: [Brassica napus](#)

Fixed modifications: Carbamidomethyl (C)

Variable modifications: Deamidated (NQ), Gln->pyro-Glu (N-term Q), Oxidation (M)

Cleavage by Trypsin: cuts C-term side of KR unless next residue is P

Sequence Coverage: 4%

Matched peptides shown in **Bold Red**

```
1 MATMAAIGSL KVPSSSSNHT RRLSSSSQRK TLSFSSSSLT GEKLNPTQEI
51 IISNLPRGNE RRTPSIVSPK AVSDSQNSQT CLDPDASRSV LGIILGGGAG
101 TRLYPLTKKR AKPAVPLGAN YRLIDIPVSN CLNSNISKIY VLTQFNSASL
151 NRHLSRAYAS NMGGYKNEGF VEVLAQQSP ENPNWFQGT AAVRQYLWLF
201 EEHNVLEFLV LAGDHLYRMD YEKFIQAHRE TDADITVAAL PMDEKRATAF
251 GLMKIDDEGR IIEFAEKPKG EQLKAMKVDT TILGLDDERA KEMPFIASMG
301 IYVVSKNVML DLLRDQFPGA NDFGSEVIPG ATDLGLRVQA YLYDGYWEDI
351 GTIEAFYNAN LGITKKPVPD FSFYDRSAPI YTQPRYLPPS KMLDADVTD
401 VIGEGCVIKN CKIHHSVIGL RSCISEGAI EDLLMGADY YETDADRTLL
451 AAKGSIPIGI GRDSHIKRAI IDKNARIGDN VKIINTDNVQ EAARETDGYF
501 IKSGIVTVIK DALIPSGTVI
```

Show predicted peptides also

Sort Peptides By

Residue Number  Increasing Mass  Decreasing Mass

| Start - End | Observed | Mr (expt) | Mr (calc) | Delta  | Miss | Sequence                            |                                    |
|-------------|----------|-----------|-----------|--------|------|-------------------------------------|------------------------------------|
| 278 - 289   | 673.9179 | 1345.8213 | 1345.6725 | 0.1487 | 0    | K.VD <b>T</b> TILGLDDER.A           | ( <a href="#">Ions score 112</a> ) |
| 483 - 494   | 672.4238 | 1342.8331 | 1342.6841 | 0.1490 | 0    | K.I <b>I</b> INTDNVQ <b>EAAR</b> .E | ( <a href="#">Ions score 74</a> )  |

# gi|780814 3-ketoacyl-acyl carrier protein synthase I

## Protein View

Match to: gi|780814 Score: 379

3-ketoacyl-acyl carrier protein synthase I

Found in search of C:\QStar Share Data\20091115MMZ\NOV26\1001NOV26.wiff

Nominal mass (M<sub>r</sub>): 50890; Calculated pI value: 7.99

NCBI BLAST search of [gi|780814](#) against nr

Unformatted [sequence string](#) for pasting into other applications

Taxonomy: [Arabidopsis thaliana](#)

Fixed modifications: Carbamidomethyl (C)

Variable modifications: Deamidated (NQ),Gln->pyro-Glu (N-term Q),Oxidation (M)

Cleavage by Trypsin: cuts C-term side of KR unless next residue is P

Sequence Coverage: 16%

Matched peptides shown in **Bold Red**

```
1 MQALQSSSLR ASPPNPLRLP SNRQSHQLIT NARPLRRQQR SFISASASTV
51 SAPKRETDPK KRVVITGMGL VSVCGNDVDA YYEKLLSGES GISLIDRFDA
101 SKFPTRFGGQ IRGFSSEGYI DGKNERLDD CLKYCIVAGK KALESANLGG
151 DKLNTIDKRK AGVLVGTGMG GLTVFSEGVQ NLIKGGHRI SPFFIPYAIT
201 NMGSALLAID LGLMGPNYSI STACATSNYC FYAAANHNHR GEADMMIAGG
251 TEAAIPIGL GGFVACRALS QRNDPQTAS RPWDKARDGF VMGEGAGVLV
301 MESLEHAMKR GAPIVAEYLG GAVNCDAHMM TDPRADGLGV SSCIERCLED
351 AGVSPPEEVNY INAHATSTLA GDLAEINAIK KVFKSTSGIK INATKSMIGH
401 CLGAAGGLEA IATVKAINIG WLHPSINQFN PEQAVDFDTV PNEKKQHEVD
451 VAISNSFGFG GHNSVVAFSA FKP
```

Show predicted peptides also

Sort Peptides By

Residue Number  Increasing Mass  Decreasing Mass

| Start - End | Observed | Mr (expt) | Mr (calc) | Delta  | Miss | Sequence                                                                            |
|-------------|----------|-----------|-----------|--------|------|-------------------------------------------------------------------------------------|
| 85 - 97     | 680.4580 | 1358.9014 | 1358.7405 | 0.1609 | 0    | <b>K.LLSGEGISLIDR.F</b> ( <a href="#">Ions score 100</a> )                          |
| 113 - 123   | 580.3375 | 1158.6605 | 1158.5193 | 0.1411 | 0    | <b>R.GFSSEGYIDGK.N</b> ( <a href="#">Ions score 59</a> )                            |
| 142 - 152   | 537.8606 | 1073.7066 | 1073.5353 | 0.1713 | 0    | <b>K.ALESANLGGDK.L</b> ( <a href="#">Ions score 68</a> )                            |
| 142 - 158   | 587.0564 | 1758.1475 | 1757.9159 | 0.2316 | 1    | <b>K.ALESANLGGDKLNTIDK.R</b> ( <a href="#">Ions score 68</a> )                      |
| 273 - 285   | 765.4231 | 1528.8317 | 1528.6906 | 0.1411 | 0    | <b>R.NDDPQTASRPWDK.A</b> ( <a href="#">Ions score 57</a> )                          |
| 273 - 285   | 510.6545 | 1528.9418 | 1528.6906 | 0.2512 | 0    | <b>R.NDDPQTASRPWDK.A</b> ( <a href="#">Ions score 40</a> )                          |
| 288 - 309   | 785.7613 | 2354.2621 | 2354.0593 | 0.2028 | 0    | <b>R.DGFVMGEGAGVLVMESLEHAMK.R</b> 3 Oxidation (M) ( <a href="#">Ions score 29</a> ) |

# gi|84579412 9-cis-epoxycarotenoid dioxygenase 4

## Protein View

Match to: gi|84579412 Score: 53

Lactuca sativa 9-cis-epoxycarotenoid dioxygenase 4

Found in search of C:\QStar Share Data\20091115MMZ\NOV15\92NOV15.wiff

Nominal mass ( $M_r$ ): 64534; Calculated pI value: 7.65

NCBI BLAST search of [gi|84579412](#) against nr

Unformatted [sequence string](#) for pasting into other applications

Taxonomy: [Lactuca sativa](#)

Fixed modifications: Carbamidomethyl (C)

Variable modifications: Oxidation (M), Phospho (ST)

Cleavage by Trypsin: cuts C-term side of KR unless next residue is P

Sequence Coverage: 1%

Matched peptides shown in **Bold Red**

```
1 MDTSVILTRC STATLVRIST RPSVTCIIQI NHHPTTNTPP HTSKPPKIKP
51 TSKSLPELTT VSPPQLNPFQ KLAASALDFV ERSNLVLEND QKRSHQADPA
101 VQLMGNFAPV PECPVHHGLE VIGEIPNDLN GFYLRNGANP MFKPTGGHHL
151 FDGDGMIHAV KLGPKNKASY CSRFTRTSRL KQELSLGRPY FPKPIGELHG
201 HLGLARLALF YARGVAGLLD TAHGIGVANA GLVYFNGRLL AMSEDDL PYS
251 INIKRDGDLA TDGRFDYDQ VNCPLIAHPK VDPVTGELFS LSYDVLKPPY
301 LKFFSFEKNG KKSREVSISL NQPTMIHDFA ITQSHIVIPD HQVVFKLSEM
351 VQGKSPVLLD PNKVSRYGIL PKSVKNESSI QWIDVPDCFC YHLWNAWEEV
401 DVKGDQIIIV IGSRTMPPDA IFNEINFDLL RSELTEIRLN RTTGQSTQRV
451 LVSGINLDAG NVNKKLLGRK TRFVYLAIVE PWPKCNGMAK VDLETGVVSK
501 LFYGNRFGG EPCFIPVEGS DKEDEGYIMS YVRDEAMERS ELVIVEASSM
551 KEIGIVRLTG RVPYGFHGT VSTHDLAN
```

Show predicted peptides also

Sort Peptides By

Residue Number  Increasing Mass  Decreasing Mass

| Start - End | Observed | Mr(expt) | Mr(calc) | Delta  | Miss | Sequence                                             |
|-------------|----------|----------|----------|--------|------|------------------------------------------------------|
| 432 - 438   | 424.2605 | 846.5065 | 846.4447 | 0.0618 | 0    | <b>R.SELTEIR.L</b> ( <a href="#">Ions score 54</a> ) |

## Peptide View

MS/MS Fragmentation of **SELTEIR**

Found in [gi|84579412](#), *Lactuca sativa* 9-cis-epoxycarotenoid dioxygenase 4

| # | b               | b <sup>++</sup> | b <sup>0</sup> | b <sup>0++</sup> | Seq. | y               | y <sup>++</sup> | y <sup>*</sup> | y <sup>*++</sup> | y <sup>0</sup>  | y <sup>0++</sup> | # |
|---|-----------------|-----------------|----------------|------------------|------|-----------------|-----------------|----------------|------------------|-----------------|------------------|---|
| 1 | 88.0393         | 44.5233         | 70.0287        | 35.5180          | S    |                 |                 |                |                  |                 |                  | 7 |
| 2 | <b>217.0819</b> | 109.0446        | 199.0713       | 100.0393         | E    | <b>760.4199</b> | 380.7136        | 743.3934       | 372.2003         | <b>742.4094</b> | 371.7083         | 6 |
| 3 | 330.1660        | 165.5866        | 312.1554       | 156.5813         | L    | <b>631.3774</b> | 316.1923        | 614.3508       | 307.6790         | <b>613.3668</b> | 307.1870         | 5 |
| 4 | 431.2136        | 216.1105        | 413.2031       | 207.1052         | T    | <b>518.2933</b> | 259.6503        | 501.2667       | 251.1370         | <b>500.2827</b> | 250.6450         | 4 |
| 5 | 560.2562        | 280.6318        | 542.2457       | 271.6265         | E    | <b>417.2456</b> | 209.1264        | 400.2191       | 200.6132         | <b>399.2350</b> | 200.1212         | 3 |
| 6 | 673.3403        | 337.1738        | 655.3297       | 328.1685         | I    | <b>288.2030</b> | 144.6051        | 271.1765       | 136.0919         |                 |                  | 2 |
| 7 |                 |                 |                |                  | R    | <b>175.1190</b> | 88.0631         | 158.0924       | 79.5498          |                 |                  | 1 |

# gi|89274227 Streptomyces cyclase/dehydrase family protein

## Protein View

Match to: gi|89274227 Score: 90

Streptomyces cyclase/dehydrase family protein [Brassica oleracea]

Found in search of D:\Sixue Chen-don't delete please\20091115MMZ\DEC01\2529.wiff

Nominal mass ( $M_r$ ): 32680; Calculated pI value: 6.61

NCBI BLAST search of [gi|89274227](#) against nr

Unformatted [sequence string](#) for pasting into other applications

Taxonomy: [Brassica oleracea](#)

Fixed modifications: Carbamidomethyl (C)

Variable modifications: Deamidated (NQ), Gln->pyro-Glu (N-term Q), Oxidation (M)

Cleavage by Trypsin: cuts C-term side of KR unless next residue is P

Sequence Coverage: 9%

Matched peptides shown in **Bold Red**

```
1 MPSELTQEER SKLTQSISEF HTYHLGPGSC SSLHAQRIHA PPEIVWSVVR
51 QFDKPQTYKH FIKSCSVEEG FEMRVGCTRD VIVISGLPAN TSTERLDMLD
101 DERRVTGFSI IGGEHRLKNY KSVTTVHRFE RERRIWTVVL ESYVVDMPDG
151 NSEDDTRMFA DTVVKLNQK LATVTEAMAR NAGDGRGSRE TTCRESFHLL
201 TAFEKQRQIT EPTVYQNPPY HTGMTPEPRT STVFIELEDH RTLPGNLTPT
251 TEEHLQRMVQ RFWGIRQLQR PRQSFGERQS I
```

Show predicted peptides also

Sort Peptides By

Residue Number  Increasing Mass  Decreasing Mass

| Start - End | Observed | Mr (expt) | Mr (calc) | Delta  | Miss | Sequence                                                       |
|-------------|----------|-----------|-----------|--------|------|----------------------------------------------------------------|
| 80 - 95     | 836.5593 | 1671.1041 | 1670.8839 | 0.2202 | 0    | R.DVIVISGLPANTSTER.L ( <a href="#">Ions score 38</a> )         |
| 171 - 180   | 539.8813 | 1077.7480 | 1077.5488 | 0.1991 | 0    | K.LATVTEAMAR.N Oxidation (M) ( <a href="#">Ions score 52</a> ) |

# gi|938021 Delta1-pyrroline-5-carboxylate synthetase

Match to: gi|938021 Score: 108

delta1-pyrroline-5-carboxylate synthetase [Arabidopsis thaliana]

Found in search of C:\QStar Share Data\20091115MMZ\NOV17\386NOV17.wiff

Nominal mass ( $M_r$ ): 78170; Calculated pI value: 6.00

NCBI BLAST search of [gi|938021](#) against nr

Unformatted [sequence string](#) for pasting into other applications

Taxonomy: [Arabidopsis thaliana](#)

Fixed modifications: Carbamidomethyl (C)

Variable modifications: Oxidation (M), Phospho (ST)

Cleavage by Trypsin: cuts C-term side of KR unless next residue is P

Sequence Coverage: 3%

Matched peptides shown in **Bold Red**

```
1 MEELDRSRAF ARDVKRIVVK VGTAVVTGKG GRLALGRLGA LFEQLAELNS
51 DGFKVILVSS GAVGLGRQRL RYRQLVNSSF ADLQKPQTEL DGKACAGVGQ
101 SSLMAYYETM FDQLDVTAAQ LLVNDSSFRD KDFRKQLNET VKSMLDLRVI
151 PIFNENDAIS TRRAPYQDSS GIFWDNDSLAL LLALELKAD LLILLSDVEG
201 LYTGPPSDPN SKLIHTFVKE KHQDEITFGD KSRLGRGGMT AKVKAAVNAA
251 YAGIPVIITS GYSAENIDKV LRGLRVGTLF HQDARLWAPI TDSNARDMAV
301 AARESSRKLQ ALSSEDRKKI LLDIADALEA NVTTIKAENE LDVASAQEAG
351 LEESMVARLV MTPGKISSLA ASVRKLADME EPIGRVLKKT EVADGLVLEK
401 TSSPLGVLLI VFESRPDALV QIASLAIRSG NGLLLKGGKE ARRSNAILHK
451 VITDAIPETV GKGLIGFVTS REEIPDLLKL DDVIDLVIPR GSNKLVQIK
501 NTKKIPVLGH ADGICHVYVD KACDTMAKR IVSDAKLDYP AACNAMETLL
551 VHKDLEQNAV LNELIFALQS NGVTLYGGPR ASKILNIPEA RSFNHEYCAK
601 ACTVEVVEDV YGAIDHIHRH GSAHTDCIVT EDHEVAELFL RQVDSAAVFH
651 NASTRFSDGF RFLGAEVGV STGRIYARGP VGVEGLLTTR WIMRKGQVW
701 DGDNGIVYTH QDIPIQA
```

Show predicted peptides also

Sort Peptides By

Residue Number  Increasing Mass  Decreasing Mass

| Start - End | Observed | Mr (expt) | Mr (calc) | Delta  | Miss | Sequence                                                   |
|-------------|----------|-----------|-----------|--------|------|------------------------------------------------------------|
| 451 - 463   | 650.3937 | 1298.7729 | 1298.7082 | 0.0647 | 0    | <b>K.VITDAIPETVGGK.L</b> ( <a href="#">Ions score 63</a> ) |
| 679 - 690   | 599.8776 | 1197.7406 | 1197.6718 | 0.0689 | 0    | <b>R.GPVGVEGLLTTR.W</b> ( <a href="#">Ions score 45</a> )  |

# gi|223530647 Aldo-keto reductase, putative

## Protein View

Match to: gi|223530647 Score: 118

aldo-keto reductase, putative [Ricinus communis]

Found in search of C:\QStar Share Data\20091115MMZ\NOV16\1660NOV16.wiff

Nominal mass ( $M_r$ ): 36795; Calculated pI value: 5.49

NCBI BLAST search of [gi|223530647](#) against nr

Unformatted [sequence string](#) for pasting into other applications

Taxonomy: [Ricinus communis](#)

Fixed modifications: Carbamidomethyl (C)

Variable modifications: Oxidation (M), Phospho (ST)

Cleavage by Trypsin: cuts C-term side of KR unless next residue is P

Sequence Coverage: 5%

Matched peptides shown in **Bold Red**

```
1 MANEIRFFEL NTGAKMPSVG LGTWQAEPGL VAAVDAAIK IGYRHIDCAQ
51 AYNNEKEIGS VLKKLFEDGV VKREDLFITS KLWCSNHDPE DVVKALEGTL
101 QDLQLDYIDL YLIHWPVKMK KESVTLEPEN FDQPDIPRTW RAMEALYNSG
151 KARAIGLSNF STKKLADLLE VARIPPAVNQ VECHPSWQQA KLREFCQSKG
201 VHLSGYSPLG SPGTTWLKSD VLKNPVLNMV AEKLGKTPAQ VALCWGLQMG
251 HSVLPKSTNE ERIKENFDVF QWSIPDDLFA KFSEIEQAST FISHGSNIAR
301 LITGTFFVSE KFGPYKSIEE LWDGEI
```

Show predicted peptides also

Sort Peptides By

Residue Number  Increasing Mass  Decreasing Mass

| Start - End      | Observed        | Mr(expt)         | Mr(calc)         | Delta         | Miss     | Sequence             |                                 |
|------------------|-----------------|------------------|------------------|---------------|----------|----------------------|---------------------------------|
| <b>7 - 15</b>    | <b>513.8067</b> | <b>1025.5989</b> | <b>1025.5182</b> | <b>0.0807</b> | <b>0</b> | <b>R.FFELNTGAK.M</b> | <a href="#">(Ions score 58)</a> |
| <b>165 - 173</b> | <b>500.3272</b> | <b>998.6399</b>  | <b>998.5760</b>  | <b>0.0639</b> | <b>0</b> | <b>K.LADLLEVAR.I</b> | <a href="#">(Ions score 60)</a> |

# gi|15235745 Serine hydroxymethyltransferase 1 (SHM1)

## Protein View

Match to: gi|15235745 Score: 198

SHM1 (SERINE HYDROXYMETHYLTRANSFERASE 1); glycine hydroxymethyltransferase/ poly(U) binding [Arabidopsis thaliana]  
Found in search of C:\QStar Share Data\20091115MMZ\NOV16\905NOV15.wiff

Nominal mass ( $M_r$ ): 57535; Calculated pI value: 8.13

NCBI BLAST search of [gi|15235745](#) against nr

Unformatted [sequence string](#) for pasting into other applications

Fixed modifications: Carbamidomethyl (C)

Variable modifications: Oxidation (M), Phospho (ST)

Cleavage by Trypsin: cuts C-term side of KR unless next residue is P

Sequence Coverage: 11%

Matched peptides shown in **Bold Red**

```
1 MAMAMALRRL SSSIDKPIRP LIRSTSCYMS SLPSEAVDEK ERSRVTPKQ
51 LNAPLEEVDP EIADIIEHEK ARQWKGLELI PSENFTSVSV MQAVGSVMTN
101 KYSEGYPGAR YGGNEYIDM AETLCQKRAL EAFRLDPEKW GNVNQPLSGS
151 PANFHVYTAL LKPHERIMAL DLPHGGLSH GYQTDKKIS AVSIFFETMP
201 YRLDESTGYI DYDQMEKSAT LFRPKLIVAG ASAYARLYDY ARIRKVCNKQ
251 KAVMLADMAH ISGLVAANVI PSPFDYADV V TTTTHKSLRG PRGAMIFFRK
301 GVKEINKQGK EVLYDFEDKI NQAVFPGLQG GPHNHTITGL AVALKQATTS
351 EYKAYQEQVL SNSAKFAQTL MERGYELVSG GTDNHLVLVN LKPKGIDGSR
401 VEKLEAVHI ASNKNTVPGD VSAMVPGGIR MGTPALTSRG FVEEDFAKVA
451 EYFDKAVTIA LKVKSEAQGT KLKDFVSAME SSSTIQSEIA KLRHEVEEFA
501 KQFPPTIGFEK ETMKYKN
```

Show predicted peptides also

Sort Peptides By

Residue Number  Increasing Mass  Decreasing Mass

| Start - End | Observed | Mr (expt) | Mr (calc) | Delta  | Miss | Sequence                                                                     |
|-------------|----------|-----------|-----------|--------|------|------------------------------------------------------------------------------|
| 203 - 217   | 911.9070 | 1821.7995 | 1821.7615 | 0.0381 | 0    | <b>R.LDESTGYIDYDQMEK.S</b> Oxidation (M) ( <a href="#">Ions score 26</a> )   |
| 311 - 319   | 579.3056 | 1156.5966 | 1156.5288 | 0.0678 | 0    | <b>K.EVLYDFEDK.I</b> ( <a href="#">Ions score 32</a> )                       |
| 415 - 430   | 529.3124 | 1584.9153 | 1584.7930 | 0.1223 | 0    | <b>K.NTVPGDV SAMVPGGIR.M</b> Oxidation (M) ( <a href="#">Ions score 61</a> ) |
| 440 - 448   | 521.2810 | 1040.5474 | 1040.4815 | 0.0660 | 0    | <b>R.GFVEEDFAK.V</b> ( <a href="#">Ions score 33</a> )                       |
| 502 - 510   | 533.8099 | 1065.6053 | 1065.5495 | 0.0558 | 0    | <b>K.QFPPTIGFEK.E</b> ( <a href="#">Ions score 48</a> )                      |



# gi|18407710 Nucleotide-rhamnose synthase/epimerase-reductase (NRS/ER)

## Protein View

Match to: gi|18407710 Score: 140

NRS/ER (NUCLEOTIDE-RHAMNOSE SYNTHASE/EPIMERASE-REDUCTASE) [Arabidopsis thaliana]

Found in search of C:\QStar Share Data\20091115MMZ\NOV15\1737NOV15.wiff

Nominal mass ( $M_r$ ): 33861; Calculated pI value: 5.73

NCBI BLAST search of [gi|18407710](#) against nr

Unformatted [sequence string](#) for pasting into other applications

Taxonomy: [Arabidopsis thaliana](#)

Links to retrieve other entries containing this sequence from NCBI Entrez:

[gi|8493590](#) from [Arabidopsis thaliana](#)

[gi|12083298](#) from [Arabidopsis thaliana](#)

[gi|41080591](#) from [Arabidopsis thaliana](#)

Fixed modifications: Carbamidomethyl (C)

Variable modifications: Oxidation (M), Phospho (ST)

Cleavage by Trypsin: cuts C-term side of KR unless next residue is P

Sequence Coverage: 10%

Matched peptides shown in **Bold Red**

```
1  MVADANGSSS SSFNFLIYGK TGWIGLLGK LCEAQGITYT YGSGRLQDRQ
51 SIVADIESVK PSHVFNAAGV TGRPNVDWCE SHKVETIRTN VAGTLTLADI
101 CREKGLVLIN YATGCIFEYD SGHPLGSGIG FKEEDTPNFT GSFYSKTKAM
151 VEELLKNYEN VCTLRVRMPI SSDLTNPRNF ITKIARYEKV VDIPNSMTIL
201 DELLPISIEM AKRNLTGIYN FTNPGVVSHN EILEMYRDIYI DPSFTWKNFT
251 LEEQAKVIVA PRSNNELDAT KLKTEFPELM SIKESLIK FV FEPNKKTEVK
301 A
```

Show predicted peptides also

Sort Peptides By

Residue Number  Increasing Mass  Decreasing Mass

| Start - End | Observed | Mr (expt) | Mr (calc) | Delta  | Miss | Sequence                                                             |
|-------------|----------|-----------|-----------|--------|------|----------------------------------------------------------------------|
| 133 - 146   | 811.3683 | 1620.7220 | 1620.6944 | 0.0276 | 0    | <b>K.EEDTPNFTGSFY</b> SK.T ( <a href="#">Ions score 74</a> )         |
| 149 - 156   | 474.7905 | 947.5665  | 947.4997  | 0.0667 | 0    | <b>K.AMVEELLK</b> .N Oxidation (M) ( <a href="#">Ions score 44</a> ) |
| 248 - 256   | 540.3066 | 1078.5986 | 1078.5295 | 0.0692 | 0    | <b>K.NFTLEE<b>QAK</b></b> .V ( <a href="#">Ions score 23</a> )       |

# gi|17865468 Glucose-1-phosphate adenylyltransferase small subunit, chloroplastic

Match to: gi|17865468 Score: 222  
RecName: Full=Glucose-1-phosphate adenylyltransferase small subunit, chloroplastic; AltName: Full=Alpha-D-glucose-1-phosphate adenylyl transferase  
Found in search of C:\QStar Share Data\20091115MMZ\NOV17\1051NOV17.wiff

Nominal mass (M<sub>r</sub>): 57294; Calculated pI value: 5.87  
NCBI BLAST search of [gi|17865468](#) against nr  
Unformatted [sequence string](#) for pasting into other applications

Taxonomy: [Brassica napus](#)  
Links to retrieve other entries containing this sequence from NCBI Entrez:  
[gi|7688095](#) from [Brassica napus](#)

Fixed modifications: Carbamidomethyl (C)  
Variable modifications: Oxidation (M), Phospho (ST)  
Cleavage by Trypsin: cuts C-term side of KR unless next residue is P  
Sequence Coverage: 9%

Matched peptides shown in **Bold Red**

1 MATMAAIGSL KVPSSSSNHT RRLSSSSQK TLSFSSSSLT GEKLNPTQEI  
51 IISNLPNGNE RRTPSIVSPK AVSDSQNSQT CLDPDASRSV LGIILGGGAG  
101 TRLYPLTKKR AKPAVPLGAN YRLIDIPVSN CLNSNISKIY VLTQFNSASL  
151 NRHLSRAYAS NMGGYKNEGF VEVLAAQQSP ENPNWFQGTA DAVRQYLWLF  
201 EEHNVLEFLV LAGDHLYRMD YEKFIQAHRE **TDADITVAAL PMDEKR**RATAF  
251 GLMKIDDEGR IIEFAEKPKG EQLKAMK**VDT TILGLDDER**A KEMPFIASMG  
301 IYVVSKNVML DLLRDQFPGA NDFGSEVIPG ATDLGLRVQA YLYDGYWEDI  
351 GTIEAFYNAN LGITKKPVPD FSFYDRSAPI YTQPRYLPPS KMLDADVTDS  
401 VIGEGCVIKN CKIHHSVIGL RSCISEGAI EDTLMLGADY YETDADRTLL  
451 AAKGSIPIGI GRDSHIKRAI IDKNARIGDN **VKIINTDNVQ EAARET**DGYF  
501 IKSGIVTVIK **DALIPSGTVI**

Show predicted peptides also

Sort Peptides By  Residue Number  Increasing Mass  Decreasing Mass

| Start - End | Observed | Mr (expt) | Mr (calc) | Delta  | Miss | Sequence                                                                      |
|-------------|----------|-----------|-----------|--------|------|-------------------------------------------------------------------------------|
| 230 - 245   | 867.9254 | 1733.8363 | 1733.8029 | 0.0334 | 0    | R.ETDADITVAAL <b>PMDEK</b> .R Oxidation (M) ( <a href="#">Ions score 18</a> ) |
| 278 - 289   | 673.8716 | 1345.7286 | 1345.6725 | 0.0560 | 0    | K.VDT <b>TILGLDDER</b> .A ( <a href="#">Ions score 109</a> )                  |
| 483 - 494   | 672.3775 | 1342.7405 | 1342.6841 | 0.0564 | 0    | K. <b>IINTDNVQEAAR</b> .E ( <a href="#">Ions score 78</a> )                   |
| 511 - 520   | 493.3126 | 984.6106  | 984.5492  | 0.0614 | 0    | K. <b>DALIPSGTVI</b> .- ( <a href="#">Ions score 18</a> )                     |

# gi|18404212 3-chloroallyl aldehyde dehydrogenase

Match to: gi|18404212 Score: 60

ALDH2C4 (REDUCED EPIDERMAL FLUORESCENCE1); 3-chloroallyl aldehyde dehydrogenase/ aldehyde dehydrogenase (NAD) [Arabidopsis thaliana]  
Found in search of C:\QStar Share Data\20091115MMZ\NOV15\753NOV15.wiff

Nominal mass ( $M_r$ ): 54782; Calculated pI value: 5.47

NCBI BLAST search of [gi|18404212](#) against nr

Unformatted [sequence string](#) for pasting into other applications

Taxonomy: [Arabidopsis thaliana](#)

Links to retrieve other entries containing this sequence from NCBI Entrez:

[gi|118595574](#) from [Arabidopsis thaliana](#)

[gi|9294041](#) from [Arabidopsis thaliana](#)

[gi|15912241](#) from [Arabidopsis thaliana](#)

[gi|20530143](#) from [Arabidopsis thaliana](#)

Fixed modifications: Carbamidomethyl (C)

Variable modifications: Oxidation (M), Phospho (ST)

Cleavage by Trypsin: cuts C-term side of KR unless next residue is P

Sequence Coverage: 1%

Matched peptides shown in **Bold Red**

```
1 MENGKCNAT TVKLPEIKFT KLFINGQFID AASGKTFETI DPRNGEVIAT
51 IAEGDKEDVD LAVNAARYAF DHGPWPRMTG FERAFLINKF ADLIEENIEE
101 LAKLDAVDGG KLFQLGKYAD IPATAGHFRY NAGAADKIHG ETLKMRQSL
151 FGYTLKEPIG VVGNIIIPWNF PSIMFATKVA PAMAAGCTMV VKPAEQTSLS
201 ALFYAHLKE AGIPDGVLNI VTGFGSTAGA AIASHMDVVK VSFTGSTDVG
251 RKIMQAAAAS NLKKVSLELG GKSPLLIFND ADIDKAADLA LLGCFYNKGE
301 ICVASSRVFV QEGYDKVVE KLVEKAKDWT VGDFFDSTAR QGPQVDRQF
351 EKILSYIEHG KNEGATLLTG GKAIGDKGYF IQPTIFADVT EDMKIYQDEI
401 FGPVMSLMKF KTVVEGIKCA NNTKYGLAAG ILSQDIDLIN TVRSIKAGI
451 IWNVCYFGFD LDCPYGGYKM SGNCRESGMD ALDNYLQTKS VVMPHLNSPW
501 M
```

Show predicted peptides also

Sort Peptides By

Residue Number  Increasing Mass  Decreasing Mass

| Start - End | Observed | Mr (expt) | Mr (calc) | Delta  | Miss | Sequence                                                 |
|-------------|----------|-----------|-----------|--------|------|----------------------------------------------------------|
| 308 - 317   | 599.3420 | 1196.6694 | 1196.6077 | 0.0617 | 0    | R.VFV <b>QEGYDK</b> .V ( <a href="#">Ions score 61</a> ) |

## Peptide View

MS/MS Fragmentation of **VFVQEGYDK**

Found in [gi|18404212](#), ALDH2C4 (REDUCED EPIDERMAL FLUORESCENCE1);

| #  | b               | b <sup>++</sup> | b <sup>*</sup> | b <sup>*++</sup> | b <sup>0</sup> | b <sup>0++</sup> | Seq. | y                | y <sup>++</sup> | y <sup>*</sup>  | y <sup>*++</sup> | y <sup>0</sup>  | y <sup>0++</sup> | #  |
|----|-----------------|-----------------|----------------|------------------|----------------|------------------|------|------------------|-----------------|-----------------|------------------|-----------------|------------------|----|
| 1  | 100.0757        | 50.5415         |                |                  |                |                  | V    |                  |                 |                 |                  |                 |                  | 10 |
| 2  | <b>247.1441</b> | 124.0757        |                |                  |                |                  | F    | <b>1098.5466</b> | 549.7769        | 1081.5201       | 541.2637         | 1080.5360       | 540.7717         | 9  |
| 3  | 346.2125        | 173.6099        |                |                  |                |                  | V    | <b>951.4782</b>  | 476.2427        | 934.4516        | 467.7295         | 933.4676        | 467.2375         | 8  |
| 4  | 474.2711        | 237.6392        | 457.2445       | 229.1259         |                |                  | Q    | <b>852.4098</b>  | 426.7085        | <b>835.3832</b> | 418.1953         | <b>834.3992</b> | 417.7032         | 7  |
| 5  | 603.3137        | 302.1605        | 586.2871       | 293.6472         | 585.3031       | 293.1552         | E    | <b>724.3512</b>  | 362.6792        | <b>707.3246</b> | 354.1660         | <b>706.3406</b> | 353.6740         | 6  |
| 6  | 660.3352        | 330.6712        | 643.3086       | 322.1579         | 642.3246       | 321.6659         | G    | <b>595.3086</b>  | 298.1579        | <b>578.2821</b> | 289.6447         | 577.2980        | 289.1527         | 5  |
| 7  | <b>773.4192</b> | 387.2132        | 756.3927       | 378.7000         | 755.4087       | 378.2080         | I    | <b>538.2871</b>  | 269.6472        | 521.2606        | 261.1339         | 520.2766        | 260.6419         | 4  |
| 8  | 936.4825        | 468.7449        | 919.4560       | 460.2316         | 918.4720       | 459.7396         | Y    | <b>425.2031</b>  | 213.1052        | 408.1765        | 204.5919         | 407.1925        | 204.0999         | 3  |
| 9  | 1051.5095       | 526.2584        | 1034.4829      | 517.7451         | 1033.4989      | 517.2531         | D    | <b>262.1397</b>  | 131.5735        | 245.1132        | 123.0602         | 244.1292        | 122.5682         | 2  |
| 10 |                 |                 |                |                  |                |                  | K    | <b>147.1128</b>  | 74.0600         | 130.0863        | 65.5468          |                 |                  | 1  |

# gi|219914490 Unnamed protein product, containing chalcone-flavanone isomerase domain

## Protein View

Match to: gi|219914490 Score: 125

unnamed protein product [Brassica napus]

Found in search of D:\Sixue Chen-don't delete please\20091115MMZ\DEC01\2287.wiff

Nominal mass ( $M_r$ ): 23362; Calculated pI value: 4.91

NCBI BLAST search of [gi|219914490](#) against nr

Unformatted [sequence string](#) for pasting into other applications

Taxonomy: [Brassica napus](#)

Fixed modifications: Carbamidomethyl (C)

Variable modifications: Deamidated (NQ), Gln->pyro-Glu (N-term Q), Oxidation (M)

Cleavage by Trypsin: cuts C-term side of KR unless next residue is P

Sequence Coverage: 14%

Matched peptides shown in **Bold Red**

```
1 MGTEMVMVHE VPFPPQIITS KPFSLLGQGI TDIEIHFLQV KFTAIGVYLD
51 PSDVKTHLDK WKGKTGKDLA GDDDFDALA SGEIEKVIRV VVIKEIKGAQ
101 YGVQLENSVR DRLAAEDKYE EEEETELEKV VGFFQSKYFK THSIITYRFS
151 AKDGICEIGF ETEGKEEEKL KVENANVVG M QKWYLSGSR GVSPSTIVSL
201 ADSLSAVLT
```

Show predicted peptides also

Sort Peptides By

Residue Number  Increasing Mass  Decreasing Mass

| Start - End | Observed | Mr(expt)  | Mr(calc)  | Delta  | Miss | Sequence                                                       |
|-------------|----------|-----------|-----------|--------|------|----------------------------------------------------------------|
| 98 - 110    | 710.9753 | 1419.9361 | 1419.7106 | 0.2254 | 0    | <b>K.GAQYGVQLENSVR.D</b> ( <a href="#">Ions score 67</a> )     |
| 113 - 129   | 685.7666 | 2054.2779 | 2053.9215 | 0.3564 | 1    | <b>R.LAAEDKYE EEEEELEK.V</b> ( <a href="#">Ions score 58</a> ) |

# gi|15237059 Arabidopsis Rab GTPase homolog E1b (AtRABE1b/AtRab8D)

## Protein View

Match to: gi|15237059 Score: 106

AtRABE1b/AtRab8D (Arabidopsis Rab GTPase homolog E1b); translation elongation factor [Arabidopsis thaliana]  
Found in search of C:\QStar Share Data\20091115MMZ\NOV15\1158NOV15.wiff

Nominal mass ( $M_r$ ): 51883; Calculated pI value: 5.84

NCBI BLAST search of [gi|15237059](#) against nr  
Unformatted [sequence string](#) for pasting into other applications

Taxonomy: [Arabidopsis thaliana](#)

Fixed modifications: Carbamidomethyl (C)

Variable modifications: Oxidation (M), Phospho (ST)

Cleavage by Trypsin: cuts C-term side of KR unless next residue is P

Sequence Coverage: 5%

Matched peptides shown in **Bold Red**

```
1 MAISAPAACS SSSRILCSYS SPSPSLCPAI STSGKLTTLT LSSSFLPSYS
51 LTTTSASQST RRSFTVRAAR GKFERKKPHV NIGTIGHVDH GKTTLTAALT
101 MALASIGSSV AKKYDEIDAA PEERARGITI NTATVEYETE NRHYAHVDCP
151 GHADYVKNMI TGAAQMDGAI LVVSGADGPM PQTKEHILLA KQGVVPMVV
201 FLNKEDQVDD AELLELELE VRELLSSYEF NGDDIPIISG SALLAVETLT
251 ENPKVKRGDN KWVDKIYELM DAVDDYIPIP QRQTELPFLL AVEDVFSITG
301 RGTVATGRVE RGTVKVGETV DLVGLRETRS YTVTGVEMFQ KILDEALAGD
351 NVGLLLRGIQ KADIQRGMVL AKPGSITPHT KFEAIYVLK KEEGGRHSPP
401 FAGYRPQFYM RTTDVTGKVT KIMNDKDEES KMVMPGDRVK IVELLIVPVA
451 CEQGMRF AIR EGGKTVGAGV IGTILE
```

Show predicted peptides also

Sort Peptides By

Residue Number  Increasing Mass  Decreasing Mass

| Start - End | Observed | Mr (expt) | Mr (calc) | Delta   | Miss | Sequence                                                            |
|-------------|----------|-----------|-----------|---------|------|---------------------------------------------------------------------|
| 1 - 14      | 898.1555 | 1794.2965 | 1794.4598 | -0.1633 | 0    | -.MAISAPAACSSSSR.I 5 Phospho (ST) ( <a href="#">Ions score 14</a> ) |
| 316 - 326   | 579.3486 | 1156.6826 | 1156.6452 | 0.0374  | 0    | K.VGETVLDVGLR.E ( <a href="#">Ions score 92</a> )                   |

# gi|295789 Elongation factor 1-alpha

## Protein View

Match to: gi|295789 Score: 199

elongation factor 1-alpha [Arabidopsis thaliana]

Found in search of C:\QStar Share Data\20091115MMZ\NOV16\1103NOV16.wiff

Nominal mass ( $M_r$ ): 49799; Calculated pI value: 9.19

NCBI BLAST search of [gi|295789](#) against nr

Unformatted [sequence string](#) for pasting into other applications

Taxonomy: [Arabidopsis thaliana](#)

Fixed modifications: Carbamidomethyl (C)

Variable modifications: Oxidation (M), Phospho (ST)

Cleavage by Trypsin: cuts C-term side of KR unless next residue is P

Sequence Coverage: 8%

Matched peptides shown in **Bold Red**

```
1 MGKEKFHINI VVIGHVDSGK STTGHLYIK LGGIDKRVIE RFEKEAAEMN
51 KRSFKYAWVL DKLKAERDRG ITIDIALWKF ETKYYCTVI DAPGHRDFIK
101 NMITGTSQAD CAVLIIDSTT GGFEAGISKD GQTRHALLA FTLGVKQMIC
151 CCNKMDATP KYSKARYDEI IKEVSSYLKK VGYNPKPIF VPISGFEGDN
201 MIERSTNLDW YKGP TLLEAL DQINEPKRPS DKPLRLPLQD VYKIGGIGTV
251 PVGRVEITGMI KPGMVVTFAP TGLTTEVKS EMHHEALLEA LPGDNVGFNV
301 KNVAVKDLKR GYVASNSKDD PAKGAANFTS QVIIMNHPGQ IINGYAPVLD
351 CHTSHIAVKF SEILTKIDRR SGKEIEKEPK FLKNGDAGMV KMTPTKPMVV
401 ETFSEYPLG RFAVRDMRQT VAVGVIKSVD KKDPTGAKVT KAAVKKGAK
```

Show predicted peptides also

Sort Peptides By

Residue Number  Increasing Mass  Decreasing Mass

| Start - End | Observed | Mr(expt)  | Mr(calc)  | Delta  | Miss | Sequence                                                  |
|-------------|----------|-----------|-----------|--------|------|-----------------------------------------------------------|
| 205 - 212   | 513.7865 | 1025.5584 | 1025.4818 | 0.0766 | 0    | R. <b>STNLDWYK.G</b> ( <a href="#">Ions score 33</a> )    |
| 236 - 243   | 488.3183 | 974.6221  | 974.5437  | 0.0784 | 0    | R. <b>LPLQDVYK.I</b> ( <a href="#">Ions score 60</a> )    |
| 244 - 254   | 513.3515 | 1024.6884 | 1024.6030 | 0.0854 | 0    | K. <b>IGGIGTVPVGR.V</b> ( <a href="#">Ions score 58</a> ) |
| 419 - 427   | 457.8256 | 913.6366  | 913.5597  | 0.0769 | 0    | R. <b>QTVAVGV</b> IK.S ( <a href="#">Ions score 49</a> )  |

# gi|303844 Eukaryotic initiation factor 4A

## Protein View

Match to: gi|303844 Score: 155

eukaryotic initiation factor 4A [Oryza sativa Japonica Group]

Found in search of C:\QStar Share Data\20091115MMZ\NOV15\1140NOV15.wiff

Nominal mass ( $M_r$ ): 47187; Calculated pI value: 5.29

NCBI BLAST search of [gi|303844](#) against nr

Unformatted [sequence string](#) for pasting into other applications

Taxonomy: [Oryza sativa Japonica Group](#)

Links to retrieve other entries containing this sequence from NCBI Entrez:

[gi|12381900](#) from [Oryza sativa](#)

Fixed modifications: Carbamidomethyl (C)

Variable modifications: Oxidation (M), Phospho (ST)

Cleavage by Trypsin: cuts C-term side of KR unless next residue is P

Sequence Coverage: 10%

Matched peptides shown in **Bold Red**

```
1  MAGMAPEGSQ  FDAKHYDSKM  QELLNQGETE  EFFTYSYDEVH  ESFDDMGLQE
51  NLLRGIYAYG  FEKPSAIQQR  GIVPFCKGLD  VIQQAQSGTG  KIATFCSGIL
101 QQLDYAVVEC  QALVLAPTRE  LAQQIEKVMR  ALGDYLGVKV  HACVGGTSVR
151 EDQRILASGV  HVVVGTGPRV  FDMLERRQSLR  PDYIKMFVLD  EADEMLSRGF
201 KDQIYDIFQL  LPSKIQGVVF  SATMPPEALE  ITRKFMNKPV  RILVKRDELT
251 LEGIKQFYVN  VEKEEWKLD  LCDLYETLAI  TQSVIFVNTR  KVDWLTDKMR
301 GRDHTVSATH  GDMDQNTRDI  IMREFRSGSS  RVLITTDLLA  RGIDVQQVSL
351 VINYDLPTQP  ENYLHRIGRS  GRFGRKGVAI  NFVTRDDERM  LFDIQRFYNV
401 VIEELPANVA  DLL
```

Show predicted peptides also

Sort Peptides By

Residue Number  Increasing Mass  Decreasing Mass

| Start - End | Observed | Mr (expt) | Mr (calc) | Delta  | Miss | Sequence                                                    |
|-------------|----------|-----------|-----------|--------|------|-------------------------------------------------------------|
| 78 - 91     | 701.3904 | 1400.7662 | 1400.7260 | 0.0402 | 0    | <b>K.GLDVIQQAQSGTGK.T</b> ( <a href="#">Ions score 27</a> ) |
| 131 - 139   | 468.2959 | 934.5772  | 934.5124  | 0.0649 | 0    | <b>R.ALGDYLGVK.V</b> ( <a href="#">Ions score 37</a> )      |
| 247 - 255   | 509.3037 | 1016.5929 | 1016.5390 | 0.0539 | 0    | <b>R.DELTLEGIK.Q</b> ( <a href="#">Ions score 35</a> )      |
| 332 - 341   | 557.8688 | 1113.7230 | 1113.6758 | 0.0473 | 0    | <b>R.VLITTDLLAR.G</b> ( <a href="#">Ions score 56</a> )     |



# gi|2494261 Elongation factor Tu, chloroplastic

## Protein View

Match to: gi|2494261 Score: 79

RecName: Full=Elongation factor Tu, chloroplastic; Short=EF-Tu; Flags: Precursor

Found in search of C:\QStar Share Data\20091115MMZ\NOV15\1193NOV15.wiff

Nominal mass ( $M_r$ ): 52177; Calculated pI value: 6.21

NCBI BLAST search of [gi|2494261](#) against nr

Unformatted [sequence string](#) for pasting into other applications

Taxonomy: [Glycine max](#)

Links to retrieve other entries containing this sequence from NCBI Entrez:

[gi|18776](#) from [Glycine max](#)

[gi|448921](#) from [Glycine max](#)

Fixed modifications: Carbamidomethyl (C)

Variable modifications: Oxidation (M), Phospho (ST)

Cleavage by Trypsin: cuts C-term side of KR unless next residue is P

Sequence Coverage: 2%

Matched peptides shown in **Bold Red**

```
1 MAVSSATASS KLILLPHASS SSSLNSTPFR SSTINTHKLI PLSSSFLHPT
51 TVLRRTPSST TTPRRTFTVR AARGKFERKK PHVNIGTIGH VDHGKTTLTA
101 ALTMALALG NSAPKKYDEI DAAPEERARG ITINTATVEY ETENRHYAHV
151 DCPGHADYVK NMITGAAQMD GAILVVSGAD GPMPQTKEHI ILAKQVGVPN
201 MVVFLNKQDQ VDDEELLQLV EIEVRDLLSS YEFPGDDTPI VSGSALLALE
251 ALMANPAIKR GDNEWVDKIF QLMDEVDNYI PIPQRQTDLP FLLAVEDVFS
301 ITGRGTVAIG RVERGTIKVG ETVDLVGLRE TRNTTVTGVE MFQKILDEAL
351 AGDNVGLLLR GVQKTDIQRG MVLAKPGTIT PHTKFSAIVY VLKKEEGGRH
401 SPFFAGYRPQ FYMRTTDVTG KVTSIMNDKD EESTMVLPGD RVKMMVELIV
451 PVACEQGMRF AIREGGKTVG AGVIQSIIE
```

Show predicted peptides also

Sort Peptides By

Residue Number  Increasing Mass  Decreasing Mass

| Start - End | Observed | Mr (expt) | Mr (calc) | Delta  | Miss | Sequence        |                                   |
|-------------|----------|-----------|-----------|--------|------|-----------------|-----------------------------------|
| 319 - 329   | 579.3593 | 1156.7041 | 1156.6452 | 0.0589 | 0    | K.VGETVDLVGLR.E | ( <a href="#">Ions score 79</a> ) |

# gi|40805177 Eukaryotic translation initiation factor-5A

## Protein View

Match to: gi|40805177 Score: 210  
eukaryotic translation initiation factor-5A [Brassica napus]  
Found in search of D:\Sixue Chen-don't delete please\20091115MMZ\DEC01\2529.wiff

Nominal mass ( $M_r$ ): 17315; Calculated pI value: 5.71  
NCBI BLAST search of [gi|40805177](#) against nr  
Unformatted [sequence string](#) for pasting into other applications

Taxonomy: [Brassica napus](#)

Fixed modifications: Carbamidomethyl (C)  
Variable modifications: Deamidated (NQ), Gln->pyro-Glu (N-term Q), Oxidation (M)  
Cleavage by Trypsin: cuts C-term side of KR unless next residue is P  
Sequence Coverage: 21%

Matched peptides shown in **Bold Red**

1 MSDEEHHFES SDAGASK**TYP QQAGNIR**KGG HIVIKGRPCK **VVEVSTSK**TG  
51 KHGHAKCHFV AIDIFTAKKL EDIVPSSHNC DVPHVNRIDY QLIDISENGF  
101 VSLLDSSGGT **KDDLKLP**TD **NLSALMK**SGF EEGKDVVVSV MSSMGEEQIC  
151 AVKEVGGGK

Show predicted peptides also

Sort Peptides By

Residue Number  Increasing Mass  Decreasing Mass

| Start - End | Observed | Mr(expt)  | Mr(calco) | Delta  | Miss | Sequence                                                                            |
|-------------|----------|-----------|-----------|--------|------|-------------------------------------------------------------------------------------|
| 18 - 27     | 574.3952 | 1146.7758 | 1146.5782 | 0.1977 | 0    | <b>K.TYPQQAGNIR.K</b> ( <a href="#">Ions score 50</a> )                             |
| 41 - 48     | 424.8308 | 847.6470  | 847.4651  | 0.1819 | 0    | <b>K.VVEVSTSK.T</b> ( <a href="#">Ions score 47</a> )                               |
| 112 - 127   | 602.4168 | 1804.2286 | 1803.8924 | 0.3362 | 1    | <b>K.DDLKLP</b> TD <b>NLSALMK.S</b> Oxidation (M) ( <a href="#">Ions score 50</a> ) |
| 116 - 127   | 667.4440 | 1332.8735 | 1332.6595 | 0.2140 | 0    | <b>K.LP</b> TD <b>NLSALMK.S</b> Oxidation (M) ( <a href="#">Ions score 64</a> )     |

# gi|9755847 Translation initiation factor 3, subunit g (eIF3g)

## Protein View

Match to: gi|9755847 Score: 142

translation initiation factor 3, subunit g (eIF3g) [Arabidopsis thaliana]

Found in search of D:\Sixue Chen-don't delete please\20091115MMZ\DEC01\1831.wiff

Nominal mass ( $M_r$ ): 32865; Calculated pI value: 8.31

NCBI BLAST search of [gi|9755847](#) against nr

Unformatted [sequence string](#) for pasting into other applications

Taxonomy: [Arabidopsis thaliana](#)

Fixed modifications: Carbamidomethyl (C)

Variable modifications: Deamidated (NQ), Gln->pyro-Glu (N-term Q), Oxidation (M)

Cleavage by Trypsin: cuts C-term side of KR unless next residue is P

Sequence Coverage: 6%

Matched peptides shown in **Bold Red**

```
1 MTIDSQQKTS KFRWGEMDED EDLDFLLPPK QVIGPDENGL KTTIEYKFND
51 EENKVKITTR TRVRKLASAR LNKRAMERRN WPKFGDAANE EAGSHLTMVS
101 TEEILLERPR APGKKADESK ATGDGLSQLG KGGAVLMVCR ICHKKGDHWT
151 SKCPYKDLAA PTDVFDIKPP TGESSTMSAA PGTGKAAYVP PSMRAGADRS
201 AVGSDMRRRN DENSVRVTNL SEDTREPDLM ELFHFPFGAVT RVYVAIDQKT
251 GVSRRGFGFVN FVSREDAQRA INKLNGYGYD NLILRVEWAT PRPT
```

Show predicted peptides also

Sort Peptides By

Residue Number  Increasing Mass  Decreasing Mass

| Start - End      | Observed        | Mr (expt)        | Mr (calc)        | Delta         | Miss     | Sequence                                                                   |
|------------------|-----------------|------------------|------------------|---------------|----------|----------------------------------------------------------------------------|
| <b>242 - 249</b> | <b>468.3539</b> | <b>934.6932</b>  | <b>934.5124</b>  | <b>0.1808</b> | <b>0</b> | <b>R.VYVAIDQK.T</b> ( <a href="#">Ions score 35</a> )                      |
| <b>274 - 285</b> | <b>706.4832</b> | <b>1410.9518</b> | <b>1410.7143</b> | <b>0.2375</b> | <b>0</b> | <b>K.LNGYGYDNLILR.V</b> Deamidated (NQ) ( <a href="#">Ions score 108</a> ) |

# gi|3775985 RNA helicase

## Protein View

Match to: gi|3775985 Score: 156  
RNA helicase [Arabidopsis thaliana]  
Found in search of C:\QStar Share Data\20091115MMZ\NOV15\1140NOV15.wiff

Nominal mass ( $M_r$ ): 44634; Calculated pI value: 5.52  
NCBI BLAST search of [gi|3775985](#) against nr  
Unformatted [sequence string](#) for pasting into other applications

Taxonomy: [Arabidopsis thaliana](#)  
Links to retrieve other entries containing this sequence from NCBI Entrez:  
[gi|9294443](#) from [Arabidopsis thaliana](#)

Fixed modifications: Carbamidomethyl (C)  
Variable modifications: Oxidation (M), Phospho (ST)  
Cleavage by Trypsin: cuts C-term side of KR unless next residue is P  
Sequence Coverage: 8%

Matched peptides shown in **Bold Red**

```
1 MDDDKLVFET TDGIEPITSF NDMGIKEDVL RGVYEYGF EK PSAIQQRAVM
51 PILQGRDVIA QAQSGTGKTS MIALSVCQVV DTSSREEVQAL ILSPTRELAT
101 QTEKTIQAIG LHANIQAAC IGGNSVGEDI RKLEHGVHVV SGTTPGRVCDM
151 IKRRSLRTRA IKLLILDESDEMLSRGFKDQ IYDVYRYLPP DLQVCLVSAT
201 LPHEILEMTS KFMTEPVKIL VKRDELTLEG IKQFFVAVEK EEWKFDTLCD
251 LYDTLTITQA VIFCNTKRKV DYLSEKMRSH NFTVSSMHGD MPQKERDAIM
301 NEFRSGDSRV LITTDVWARG IDVQQVSLVI NYDLPNNREL YIHRIGRSGR
351 FGRKGVAINF VKSDDIKILR DIEQYYSTQI DEMPMMVADL I
```

Show predicted peptides also

Sort Peptides By

Residue Number  Increasing Mass  Decreasing Mass

| Start - End | Observed | Mr (expt) | Mr (calc) | Delta  | Miss | Sequence                                                                 |
|-------------|----------|-----------|-----------|--------|------|--------------------------------------------------------------------------|
| 86 - 96     | 613.8765 | 1225.7384 | 1225.7030 | 0.0354 | 0    | <b>R.EVQALILSPTR.E</b> ( <a href="#">Ions score 55</a> )                 |
| 163 - 175   | 775.4470 | 1548.8794 | 1548.7705 | 0.1089 | 0    | <b>K.LLILDESDEMLSR.G</b> Oxidation (M) ( <a href="#">Ions score 67</a> ) |
| 224 - 232   | 509.3037 | 1016.5929 | 1016.5390 | 0.0539 | 0    | <b>R.DELTLEGIK.Q</b> ( <a href="#">Ions score 35</a> )                   |

# gi|17819 Glycine-rich RNA binding protein

## Protein View

Match to: gi|17819 Score: 260  
glycine-rich RNA binding protein [Brassica napus]  
Found in search of D:\Sixue Chen-don't delete please\20091115MM2\DEC01\2716.wiff

Nominal mass ( $M_r$ ): 16351; Calculated pI value: 5.56  
NCBI BLAST search of [gi|17819](#) against nr  
Unformatted [sequence string](#) for pasting into other applications

Taxonomy: [Brassica napus](#)

Fixed modifications: Carbamidomethyl (C)  
Variable modifications: Deamidated (NQ),Gln->pyro-Glu (N-term Q),Oxidation (M)  
Cleavage by Trypsin: cuts C-term side of KR unless next residue is P  
Sequence Coverage: 44%

Matched peptides shown in **Bold Red**

1 MSEVEYRCFV GGLAWATGDA ELERT**TFSQFG** EVIDSKIIND RETGRSRGFG  
51 FVT**FKDEKSM** **KDAIDEMNGK** ELDGRTITVN EAQSRGGGGG GGRGGGGYGG  
101 RGGGGYGGGG GYGDRRGGG GYGSGGGGRG **GGGYSGGGG** YGGGGRRDG  
151 **GGYGGDGGY** GGGSGGGW

Show predicted peptides also

Sort Peptides By  Residue Number  Increasing Mass  Decreasing Mass

| Start - End | Observed | Mr (expt) | Mr (calc) | Delta  | Miss | Sequence                                                                            |
|-------------|----------|-----------|-----------|--------|------|-------------------------------------------------------------------------------------|
| 25 - 36     | 679.4453 | 1356.8760 | 1356.6562 | 0.2199 | 0    | R.TFSQFGEVIDSK.I ( <a href="#">Ions score 61</a> )                                  |
| 62 - 75     | 527.3423 | 1579.0052 | 1578.6831 | 0.3220 | 1    | K.DAIDEMNGKELDGR.T Deamidated (NQ); Oxidation (M) ( <a href="#">Ions score 31</a> ) |
| 76 - 85     | 559.9056 | 1117.7966 | 1117.5727 | 0.2238 | 0    | R.TITVNEAQRS.G ( <a href="#">Ions score 60</a> )                                    |
| 130 - 147   | 693.9151 | 1385.8156 | 1385.5709 | 0.2447 | 0    | R.GGGYSGGGGYGGGGGR.R ( <a href="#">Ions score 79</a> )                              |
| 149 - 169   | 852.4374 | 1702.8602 | 1702.6245 | 0.2357 | 0    | R.DGGYGGDGGYGGGSGGGW.- ( <a href="#">Ions score 29</a> )                            |

# gi|15237716 KH domain-containing protein NOVA, putative

## Protein View

Match to: gi|15237716 Score: 91  
KH domain-containing protein NOVA, putative [Arabidopsis thaliana]  
Found in search of C:\QStar Share Data\20091115MMZ\NOV15\1509NOV15.wiff

Nominal mass ( $M_r$ ): 33857; Calculated pI value: 5.70  
NCBI BLAST search of [gi|15237716](#) against nr  
Unformatted [sequence string](#) for pasting into other applications

Taxonomy: [Arabidopsis thaliana](#)  
Links to retrieve other entries containing this sequence from NCBI Entrez:  
[gi|14030641](#) from [Arabidopsis thaliana](#)  
[gi|7406447](#) from [Arabidopsis thaliana](#)  
[gi|21554568](#) from [Arabidopsis thaliana](#)  
[gi|23507775](#) from [Arabidopsis thaliana](#)

Fixed modifications: Carbamidomethyl (C)  
Variable modifications: Oxidation (M), Phospho (ST)  
Cleavage by Trypsin: cuts C-term side of KR unless next residue is P  
Sequence Coverage: 7%

Matched peptides shown in **Bold Red**

```
1 MESTESYAAG SPEELAKRSP EPHDSSEADS AEKPTHIRFL VSNAAGSVI
51 GKGGSTITEF QAKSGARIQL SRNQEFFPGT TDRIIMISGS IKEVVNGLEL
101 ILDKLHSELH AEDGNEVEPR RRIRLVV PNS SCGGIIGKGG ATIKSFIEES
151 KAGIKISPLD NTFYGLSDRL VTLSGTFEEQ MRAIDLILAK LTEDDHYSQN
201 VHSPYSYAAG YNSVNYAPNG SGGKYQNHKE EASTTVTIGV ADEHIGLVLG
251 RGGRNIMEIT QMTGARIKIS DRGDFMSGTT DRKVSITGPQ RAIQQAETMI
301 KQKVDSATER TTD
```

Show predicted peptides also

Sort Peptides By

Residue Number  Increasing Mass  Decreasing Mass

| Start - End | Observed | Mr (expt) | Mr (calc) | Delta  | Miss | Sequence               |                                 |
|-------------|----------|-----------|-----------|--------|------|------------------------|---------------------------------|
| 53 - 63     | 569.8253 | 1137.6361 | 1137.5666 | 0.0695 | 0    | <b>K.GGSTITEFQAK.S</b> | <a href="#">(Ions score 35)</a> |
| 73 - 83     | 656.3271 | 1310.6396 | 1310.5891 | 0.0505 | 0    | <b>R.NQEFFPGTTDR.I</b> | <a href="#">(Ions score 56)</a> |

# gi|9758155 40S ribosomal protein S3

## Protein View

Match to: gi|9758155 Score: 154

40S ribosomal protein S3 [Arabidopsis thaliana]

Found in search of D:\Sixue Chen-don't delete please\20091115MMZ\DEC01\1831.wiff

Nominal mass ( $M_r$ ): 27612; Calculated pI value: 9.57

NCBI BLAST search of [gi|9758155](#) against nr

Unformatted [sequence string](#) for pasting into other applications

Taxonomy: [Arabidopsis thaliana](#)

Fixed modifications: Carbamidomethyl (C)

Variable modifications: Deamidated (NQ), Gln->pyro-Glu (N-term Q), Oxidation (M)

Cleavage by Trypsin: cuts C-term side of KR unless next residue is P

Sequence Coverage: 13%

Matched peptides shown in **Bold Red**

```
1 MATQISKKRRK FVADGVFYAE LNEVLTRELA EDGYSGVEVR VTPMRTEIII
51 RATRTQNVLG EKGRRIRELT SLVQKRFKFP QDSVELYAEK VANRGLCAIA
101 QAESLRYKLL GGLAVRRACY GVLRFVMESG AKGCEVIVSG KLRAARAKSM
151 KFKDGYMVSS GQPTKEYIDA AVRHVLLRQG VLGLKVKIML DWDPKGKQGP
201 MTPLPDVVII HTPKEDDVYI APAQVVTQAA FVPEAPLTTT DYPAMPVA
```

Show predicted peptides also

Sort Peptides By

Residue Number  Increasing Mass  Decreasing Mass

| Start - End    | Observed        | Mr(expt)         | Mr(calc)         | Delta         | Miss | Sequence                                                   |
|----------------|-----------------|------------------|------------------|---------------|------|------------------------------------------------------------|
| <b>28 - 40</b> | <b>712.4520</b> | <b>1422.8895</b> | <b>1422.6627</b> | <b>0.2268</b> | 0    | <b>R.ELAEDGYSGVEVR.V</b> ( <a href="#">Ions score 93</a> ) |
| <b>68 - 75</b> | <b>459.3551</b> | <b>916.6956</b>  | <b>916.5229</b>  | <b>0.1727</b> | 0    | <b>R.ELTSLVQK.R</b> ( <a href="#">Ions score 36</a> )      |
| <b>79 - 90</b> | <b>713.4652</b> | <b>1424.9158</b> | <b>1424.6823</b> | <b>0.2334</b> | 0    | <b>K.FPQDSVELYAEK.V</b> ( <a href="#">Ions score 24</a> )  |

# gi|6729494 60S ribosomal protein L12-like

## Protein View

Match to: gi|6729494 Score: 128

60S RIBOSOMAL PROTEIN L12-like [Arabidopsis thaliana]

Found in search of D:\Sixue Chen-don't delete please\20091115MM2\DEC01\2605.wiff

Nominal mass ( $M_r$ ): 18073; Calculated pI value: 9.05

NCBI BLAST search of [gi|6729494](#) against nr

Unformatted [sequence string](#) for pasting into other applications

Taxonomy: [Arabidopsis thaliana](#)

Fixed modifications: Carbamidomethyl (C)

Variable modifications: Deamidated (NQ), Gln->pyro-Glu (N-term Q), Oxidation (M)

Cleavage by Trypsin: cuts C-term side of KR unless next residue is P

Sequence Coverage: 26%

Matched peptides shown in **Bold Red**

```
1 MPPKLDPSQI VDVYVRVTGG EVGAASSLAP KIGPLGLAPK KIGEDIAKET
51 AKEWKGLRVT VKLTVQNRQA KVTVVPSAAA LVIKALKEPE RDRKKVKNIK
101 HNGNISFDDV TEIARIMRPR SIAKELSGTV REILGTCVSV GCTVDGKDPK
151 DLQQEIQEGE IEIPEN
```

Show predicted peptides also

Sort Peptides By

Residue Number  Increasing Mass  Decreasing Mass

| Start - End      | Observed        | Mr(expt)         | Mr(calc)         | Delta         | Miss     | Sequence                                                      |
|------------------|-----------------|------------------|------------------|---------------|----------|---------------------------------------------------------------|
| <b>17 - 31</b>   | <b>672.4817</b> | <b>1342.9489</b> | <b>1342.7092</b> | <b>0.2396</b> | <b>0</b> | <b>R.VTGGEVGAASSLAPK.I</b> ( <a href="#">Ions score 53</a> )  |
| <b>72 - 84</b>   | <b>634.5083</b> | <b>1267.0020</b> | <b>1266.7911</b> | <b>0.2109</b> | <b>0</b> | <b>K.VTVVPSAAALVIK.A</b> ( <a href="#">Ions score 47</a> )    |
| <b>151 - 166</b> | <b>942.5582</b> | <b>1883.1019</b> | <b>1882.8796</b> | <b>0.2223</b> | <b>0</b> | <b>K.DLQQEIQEGEIEIPEN.-</b> ( <a href="#">Ions score 28</a> ) |



# gi|550544 Ribosomal protein L16

## Protein View

Match to: gi|550544 Score: 118

ribosomal protein L16 [Arabidopsis thaliana]

Found in search of D:\Sixue Chen-don't delete please\20091115MMZ\DEC01\2420.wiff

Nominal mass ( $M_r$ ): 21033; Calculated pI value: 9.94

NCBI BLAST search of [gi|550544](#) against nr

Unformatted [sequence string](#) for pasting into other applications

Taxonomy: [Arabidopsis thaliana](#)

Fixed modifications: Carbamidomethyl (C)

Variable modifications: Deamidated (NQ), Gln->pyro-Glu (N-term Q), Oxidation (M)

Cleavage by Trypsin: cuts C-term side of KR unless next residue is P

Sequence Coverage: 14%

Matched peptides shown in **Bold Red**

```
1 MASEKKLSNP MRDIKVQKLV LNISVGESGD RLTRASKVLE QLSGQTPVFS
51 KARYTVRSFG IRRNEKIACY VTVRGEKAMQ LLESGLKVKE YELLRRNFSD
101 TGCFGFGIQE HIDLGIKYDP STGIYGMIFY VVLERPGYRV ARRRRCKTRV
151 GIQHRVTKDD AMKWFQVKYE GVILNKSQNI TG
```

Show predicted peptides also

Sort Peptides By

Residue Number  Increasing Mass  Decreasing Mass

| Start - End | Observed | Mr(expt)  | Mr(calc)  | Delta  | Miss | Sequence                  |                                   |
|-------------|----------|-----------|-----------|--------|------|---------------------------|-----------------------------------|
| 19 - 31     | 679.9806 | 1357.9467 | 1357.7201 | 0.2266 | 0    | <b>K.LVLNISVGESGDR.L</b>  | ( <a href="#">Ions score 77</a> ) |
| 38 - 51     | 767.0295 | 1532.0444 | 1531.8246 | 0.2198 | 0    | <b>K.VLEQLSGQTPVFSK.A</b> | ( <a href="#">Ions score 41</a> ) |

# gi|30692346 Ribosomal protein S1; RNA binding

Match to: gi|30692346 Score: 272

RPS1 (ribosomal protein S1); RNA binding [Arabidopsis thaliana]

Found in search of C:\QStar Share Data\20091115MMZ\NOV16\1259NOV16.wiff

Nominal mass ( $M_r$ ): 45310; Calculated pI value: 5.13

NCBI BLAST search of [gi|30692346](#) against nr

Unformatted [sequence string](#) for pasting into other applications

Taxonomy: [Arabidopsis thaliana](#)

Fixed modifications: Carbamidomethyl (C)

Variable modifications: Oxidation (M), Phospho (ST)

Cleavage by Trypsin: cuts C-term side of KR unless next residue is P

Sequence Coverage: 12%

Matched peptides shown in **Bold Red**

```
1 MASLAQQFSG LRCSPSSSS RLSRRASKNF PQNKSASVSP TIVAAMVSS
51 GQTKERLELK KMFEDAYERC RTSPMEGVAF TVDDFAAAIE QYDFNSEIGT
101 RVKGTVFKTD ANGALVDISA KSSAYLSVEQ ACIHRIKHVE EAGIVPGMVE
151 EFVIIGENES DDSLLSLRN IQYELAWERC RQLQAEDVIV KAKVIGANKG
201 GLVALVEGLR GFVPFSQISS KAAAEELLEK EIPLKFVEVD EEQTKLVLSN
251 RKAVADSQAQ LGIGSVVLGV VQSLKPYGAF IDIGGINGLL HVSQISHDRV
301 SDIATVLQPG DTLKVMILSH DRDRGRVSLs TKKLEPTPGD MIRNPKLVFE
351 KAEEMAQTFR QRIAQAEAMA RADMLRFQPE SGLTLSSDGI LGPLGSELPD
401 DGVDLTVDDI PSAVDI
```

Show predicted peptides also

Sort Peptides By

Residue Number  Increasing Mass  Decreasing Mass

| Start - End | Observed | Mr(expt)  | Mr(calc)  | Delta  | Miss | Sequence                                                   |
|-------------|----------|-----------|-----------|--------|------|------------------------------------------------------------|
| 109 - 121   | 637.8523 | 1273.6900 | 1273.6514 | 0.0386 | 0    | <b>K.TDANGALVDISAK.S</b> ( <a href="#">Ions score 65</a> ) |
| 211 - 221   | 598.8503 | 1195.6861 | 1195.6237 | 0.0623 | 0    | <b>R.GFVPFSQISSK.A</b> ( <a href="#">Ions score 35</a> )   |
| 222 - 230   | 487.3028 | 972.5910  | 972.5127  | 0.0783 | 0    | <b>K.AAAEELLEK.E</b> ( <a href="#">Ions score 62</a> )     |
| 222 - 230   | 487.3028 | 972.5910  | 972.5127  | 0.0783 | 0    | <b>K.AAAEELLEK.E</b> ( <a href="#">Ions score 23</a> )     |
| 236 - 245   | 612.3180 | 1222.6214 | 1222.5717 | 0.0496 | 0    | <b>K.FVEVDEEQTK.L</b> ( <a href="#">Ions score 51</a> )    |
| 352 - 360   | 541.7810 | 1081.5475 | 1081.4862 | 0.0613 | 0    | <b>K.AEEMAQTFR.Q</b> ( <a href="#">Ions score 59</a> )     |

# gi|13194778 Putative ATP-dependent Clp protease proteolytic subunit ClpP6

## Protein View

Match to: gi|13194778 Score: 77

putative ATP-dependent Clp protease proteolytic subunit ClpP6 [Arabidopsis thaliana]

Found in search of D:\Sixue Chen-don't delete please\20091115MMZ\DEC01\2352DEC04.wiff

Nominal mass ( $M_r$ ): 29534; Calculated pI value: 9.38

NCBI BLAST search of [gi|13194778](#) against nr

Unformatted [sequence string](#) for pasting into other applications

Taxonomy: [Arabidopsis thaliana](#)

Fixed modifications: Carbamidomethyl (C)

Variable modifications: Deamidated (NQ), Gln->pyro-Glu (N-term Q), Oxidation (M)

Cleavage by Trypsin: cuts C-term side of KR unless next residue is P

Sequence Coverage: 8%

Matched peptides shown in **Bold Red**

```
1  MAGLAISPPL  GLSFSSRTRN  PKPTSFLSHN  QRNPIRRIVS  ALQSPYGDSL
51  KAGLSSNVSG  SPIKIDNKAP  RFGVIEAKKG  NPPVMPSVMT  PGGPLDLSSV
101 LFRNRRIIFIG  QPINAQVAQR  VISQLVTLAS  IDDKSDILMY  LNCPPGGSTYS
151 VLAIYDCMSW  IKPKVGTVAF GVAASQGALL LAGGEKGMRY  AMPNTRVMIH
201 QPQTGCGGHV  EDVRRQVNEA  IEARQKIDRM  YAAFTGQPLE  KVQQYTERDR
251 FLSASEALEF  GLIDGLLETE  Y
```

Show predicted peptides also

Sort Peptides By

Residue Number  Increasing Mass  Decreasing Mass

| Start - End | Observed | Mr (expt) | Mr (calc) | Delta  | Miss | Sequence                                                            |
|-------------|----------|-----------|-----------|--------|------|---------------------------------------------------------------------|
| 165 - 186   | 672.8175 | 2015.4305 | 2015.1051 | 0.3254 | 0    | <b>K.VGTVAFGVAASQGALLLAGGEK.G</b> ( <a href="#">Ions score 77</a> ) |

## Peptide View

MS/MS Fragmentation of **VGTVAFGVAASQGALLAGGEK**

Found in [gi|13194778](#), putative ATP-dependent Clp protease proteolytic subunit ClpP6 [*Arabidopsis thaliana*]

| #  | b               | b <sup>++</sup> | b <sup>*</sup> | b <sup>+++</sup> | b <sup>0</sup>  | b <sup>0++</sup> | Seq. | y                | y <sup>++</sup> | y <sup>*</sup>   | y <sup>+++</sup> | y <sup>0</sup>   | y <sup>0++</sup> | #  |
|----|-----------------|-----------------|----------------|------------------|-----------------|------------------|------|------------------|-----------------|------------------|------------------|------------------|------------------|----|
| 1  | 100.0757        | 50.5415         |                |                  |                 |                  | V    |                  |                 |                  |                  |                  |                  | 22 |
| 2  | 157.0972        | 79.0522         |                |                  |                 |                  | G    | 1917.0440        | 959.0256        | 1900.0175        | 950.5124         | 1899.0334        | 950.0204         | 21 |
| 3  | <b>258.1448</b> | 129.5761        |                |                  | <b>240.1343</b> | 120.5708         | T    | 1860.0225        | 930.5149        | 1842.9960        | 922.0016         | 1842.0120        | 921.5096         | 20 |
| 4  | 357.2132        | 179.1103        |                |                  | 339.2027        | 170.1050         | V    | 1758.9749        | 879.9911        | 1741.9483        | <b>871.4778</b>  | 1740.9643        | 870.9858         | 19 |
| 5  | <b>428.2504</b> | 214.6288        |                |                  | 410.2398        | 205.6235         | A    | 1659.9064        | 830.4569        | 1642.8799        | 821.9436         | 1641.8959        | 821.4516         | 18 |
| 6  | 575.3188        | 288.1630        |                |                  | 557.3082        | 279.1577         | F    | 1588.8693        | 794.9383        | 1571.8428        | 786.4250         | 1570.8588        | 785.9330         | 17 |
| 7  | 632.3402        | 316.6738        |                |                  | 614.3297        | 307.6685         | G    | 1441.8009        | 721.4041        | 1424.7744        | 712.8908         | 1423.7904        | 712.3988         | 16 |
| 8  | 731.4087        | 366.2080        |                |                  | <b>713.3981</b> | 357.2027         | V    | 1384.7795        | 692.8934        | 1367.7529        | 684.3801         | 1366.7689        | 683.8881         | 15 |
| 9  | 802.4458        | 401.7265        |                |                  | <b>784.4352</b> | 392.7212         | A    | 1285.7110        | 643.3592        | 1268.6845        | 634.8459         | 1267.7005        | 634.3539         | 14 |
| 10 | 873.4829        | 437.2451        |                |                  | 855.4723        | <b>428.2398</b>  | A    | <b>1214.6739</b> | 607.8406        | 1197.6474        | 599.3273         | 1196.6634        | 598.8353         | 13 |
| 11 | 960.5149        | 480.7611        |                |                  | <b>942.5043</b> | 471.7558         | S    | <b>1143.6368</b> | 572.3220        | 1126.6103        | 563.8088         | 1125.6262        | 563.3168         | 12 |
| 12 | 1088.5735       | 544.7904        | 1071.5469      | 536.2771         | 1070.5629       | 535.7851         | Q    | <b>1056.6048</b> | 528.8060        | <b>1039.5782</b> | 520.2928         | <b>1038.5942</b> | 519.8007         | 11 |
| 13 | 1145.5950       | 573.3011        | 1128.5684      | 564.7878         | 1127.5844       | 564.2958         | G    | <b>928.5462</b>  | 464.7767        | 911.5197         | 456.2635         | 910.5356         | 455.7715         | 10 |
| 14 | 1216.6321       | 608.8197        | 1199.6055      | 600.3064         | 1198.6215       | 599.8144         | A    | <b>871.5247</b>  | 436.2660        | 854.4982         | 427.7527         | 853.5142         | 427.2607         | 9  |
| 15 | 1329.7161       | 665.3617        | 1312.6896      | 656.8484         | 1311.7056       | 656.3564         | L    | <b>800.4876</b>  | 400.7475        | 783.4611         | 392.2342         | 782.4771         | 391.7422         | 8  |
| 16 | 1442.8002       | 721.9037        | 1425.7736      | <b>713.3905</b>  | 1424.7896       | 712.8985         | L    | <b>687.4036</b>  | 344.2054        | 670.3770         | 335.6921         | 669.3930         | 335.2001         | 7  |
| 17 | 1555.8843       | 778.4458        | 1538.8577      | 769.9325         | 1537.8737       | 769.4405         | L    | <b>574.3195</b>  | 287.6634        | 557.2930         | 279.1501         | 556.3089         | 278.6581         | 6  |
| 18 | 1626.9214       | 813.9643        | 1609.8948      | 805.4510         | 1608.9108       | 804.9590         | A    | <b>461.2354</b>  | 231.1214        | 444.2089         | 222.6081         | 443.2249         | 222.1161         | 5  |
| 19 | 1683.9428       | 842.4751        | 1666.9163      | 833.9618         | 1665.9323       | 833.4698         | G    | <b>390.1983</b>  | 195.6028        | 373.1718         | 187.0895         | 372.1878         | 186.5975         | 4  |
| 20 | 1740.9643       | 870.9858        | 1723.9377      | 862.4725         | 1722.9537       | 861.9805         | G    | 333.1769         | 167.0921        | 316.1503         | 158.5788         | 315.1663         | 158.0868         | 3  |
| 21 | 1870.0069       | 935.5071        | 1852.9803      | 926.9938         | 1851.9963       | 926.5018         | E    | 276.1554         | 138.5813        | 259.1288         | 130.0681         | <b>258.1448</b>  | 129.5761         | 2  |
| 22 |                 |                 |                |                  |                 |                  | K    | 147.1128         | 74.0600         | 130.0863         | 65.5468          |                  |                  | 1  |

# gi|4105131 ClpC protease

Match to: gi|4105131 Score: 97

ClpC protease [*Spinacia oleracea*]

Found in search of C:\QStar Share Data\20091115MMZ\NOV26\273NOV26.wiff

Nominal mass ( $M_r$ ): 99588; Calculated pI value: 8.78

NCBI BLAST search of [gi|4105131](#) against nr

Unformatted [sequence string](#) for pasting into other applications

Taxonomy: [Spinacia oleracea](#)

Fixed modifications: Carbamidomethyl (C)

Variable modifications: Deamidated (NQ),Gln->pyro-Glu (N-term Q),Oxidation (M)

Cleavage by Trypsin: cuts C-term side of KR unless next residue is P

Sequence Coverage: 2%

Matched peptides shown in **Bold Red**

```
1 MAGALIQSTN IPSLAYKVNG QFQRSDKGNK AVKMMASLQD PGYRMRTFSG
51 VRGGNALDTL GTTSECFYSK MRAVLSVRKG TASRGVVRAM FERFTEKAIK
101 VIMLAQEEAR RLGHNFBVTE QILLGLIGEG TGIAAKVLKS MGINLKDARV
151 EVEKIIGRGS GFVAVEIPFT PRAKRVLELS LEEARQLGHN YIGSEHLLG
201 LLREGGVAA RVLENLGADP SNIRTQVIRM VGENTEAVGA GVGGGTTGNK
251 MPTLEEYGTN LTKLAEKGK DPVVGQRQAQI ERVIQILGRR TKNNPCLIGE
301 PGVGKTAIAE GLAQR IATGD VPETIEGKKV ITLHMGLLVA GTKYRGEFEE
351 RLKKLMEEIK QSDEIILFID EVHTLIGAGA AEGAIDRANI LKPRFRRGEL
401 QCIGATTLDE YRKHIEKDPA LERRFQPVKV PEPTVDETIQ ILKGLRERYE
451 IHKKLRYTDE ALVAAAQLSY QYISDRFLPD KAILDIDEAG SRVLPSSLKK
501 LESWLQHEKE LRQLTEKNE AVRGQDFEKA GELRDREMDL KAQISALVEK
551 KKEMSKAETE AGDVGPMVTE SDIQHIVSSW TGIPVEKVST DESDRLLKME
601 DTLHTRVIGQ DEAVKAISRA IRRARVGLKN PNRPIASFIF SGPTGVGKSE
651 LAKALAAYYF GSEEAMIRLD MSEFMERHTV SKLIGSPPGY VGYTEGGQLT
701 EAVRRRPTYV VLFDEIEKAH PDVFNMLQI LEDGRLTDSK GRTADFKNTL
751 LIMITSNVGS VIEKGRRIG FDLDYDEKDS SYNRIKSLVT EELKQYFRPE
801 FLNRLDEMIV FRQLTKLEVK EIADIMLKEV FGRLKNKEIE LQVTERFRDR
851 VVDEGYNPSY GARPLRRAIM RLEDSMAEK MLARKSKRVI Q
```

Show predicted peptides also

Sort Peptides By

Residue Number  Increasing Mass  Decreasing Mass

| Start - End | Observed | Mr (expt) | Mr (calc) | Delta  | Miss | Sequence                 |                                   |
|-------------|----------|-----------|-----------|--------|------|--------------------------|-----------------------------------|
| 212 - 224   | 699.4411 | 1396.8676 | 1396.7310 | 0.1365 | 0    | <b>R.VLENLGADPSNIR.T</b> | ( <a href="#">Ions score 40</a> ) |
| 316 - 328   | 665.4043 | 1328.7940 | 1328.6824 | 0.1117 | 0    | <b>R.IATGDVPETIEGK.K</b> | ( <a href="#">Ions score 57</a> ) |

# gi|15232123 Cyclophilin 38 (CYP38); peptidyl-prolyl cis-trans isomerase

Match to: gi|15232123 Score: 126

CYP38 (CYCLOPHILIN 38); peptidyl-prolyl cis-trans isomerase [Arabidopsis thaliana]

Found in search of C:\QStar Share Data\20091115MMZ\NOV17\1573NOV17.wiff

Nominal mass ( $M_r$ ): 48180; Calculated pI value: 5.06

NCBI BLAST search of [gi|15232123](#) against nr

Unformatted [sequence string](#) for pasting into other applications

Taxonomy: [Arabidopsis thaliana](#)

Links to retrieve other entries containing this sequence from NCBI Entrez:

[gi|75266250](#) from [Arabidopsis thaliana](#)

[gi|6016707](#) from [Arabidopsis thaliana](#)

[gi|14532438](#) from [Arabidopsis thaliana](#)

[gi|21360549](#) from [Arabidopsis thaliana](#)

[gi|21593368](#) from [Arabidopsis thaliana](#)

[gi|45680876](#) from [Arabidopsis thaliana](#)

Fixed modifications: Carbamidomethyl (C)

Variable modifications: Oxidation (M), Phospho (ST)

Cleavage by Trypsin: cuts C-term side of KR unless next residue is P

Sequence Coverage: 9%

Matched peptides shown in **Red**

```
1 MAAAFASLPT FSVVNSSRFP RRRIGFSCSK KPLEVRCSSG NTRYTKQRGA
51 FTSLKECAIS LALSVGLMVS VPSIALPPNA HAVANPVIPD VSVLISGPPI
101 KDPEALLRYA LPIDNKAIRES VQKPLEDITD SLKIAGVKAL DSVERNVRQA
151 SRTLQQGKSI IVAGFAESKK DHGNEMIEKL EAGMQDMLKI VEDRKRDAVA
201 PKQKEILKYV GGIEEDMVDG FPYEVPPEYR NMPLKGRAS VDMKVKIKDN
251 PNIEDCVFRI VLDGYNAPVT AGNFVDLVER HFYDGMEIQR SDGFVVQTGD
301 PEGPAEGFID PSTEKTRIVP LEIMVTGEKT PFYGSTLEEL GLYKAQVVIP
351 FNAFGTMAMA REEFENDSGS SQVFWLLKES ELTPSNSNIL DGRYAVFGYV
401 TDNEDFLADL KVGDVIESIQ VVSGLENLAN PSYKIAG
```

Show predicted peptides also

Sort Peptides By

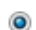

Residue Number

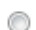

Increasing Mass

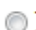

Decreasing Mass

| Start - End | Observed | Mr (expt) | Mr (calc) | Delta  | Miss | Sequence                                                                 |
|-------------|----------|-----------|-----------|--------|------|--------------------------------------------------------------------------|
| 291 - 315   | 860.4586 | 2578.3539 | 2578.1711 | 0.1827 | 0    | R.SDGFVVQTGDPEGPAEGFID <b>PSTEK</b> .T ( <a href="#">Ions score 46</a> ) |
| 379 - 393   | 816.4624 | 1630.9103 | 1630.7798 | 0.1305 | 0    | K.ESELTPSNSNIL <b>DGR</b> .Y ( <a href="#">Ions score 80</a> )           |

# gi|405131 Cyclophilin

## Protein View

Match to: gi|405131 Score: 116  
cyclophilin

Found in search of D:\Sixue Chen-don't delete please\20091115MMZ\DEC01\2222.wiff

Nominal mass ( $M_r$ ): 28532; Calculated pI value: 8.83

NCBI BLAST search of [gi|405131](#) against nr

Unformatted [sequence string](#) for pasting into other applications

Taxonomy: [Arabidopsis thaliana](#)

Fixed modifications: Carbamidomethyl (C)

Variable modifications: Deamidated (NQ), Gln->pyro-Glu (N-term Q), Oxidation (M)

Cleavage by Trypsin: cuts C-term side of KR unless next residue is P

Sequence Coverage: 12%

Matched peptides shown in **Bold Red**

```
1 MASSSSMQMV HTSRSlAQIG FGVKSQLVSA NRTIQSVCFG ARSSGIALSS
51 RLHYASPIKQ FSGVYATTKH QRTACVKMSA AEEEEVIEPQ AKVTNKVYFD
101 VEIGGEVAGR IVMGLFGEVV PKTVENFRAL CTGEKKYGYK GSSFHRIIKD
151 FMIQGGDFTE GNGTGGISlY GAKFEDENFT LKHTGPGILS MANAGPNTNG
201 SQFFICTVKT SWLDNKHVVF GQVIEGMKLV RTLESQETRA FDVPPKGCRI
251 YACGELPLDA
```

Show predicted peptides also

Sort Peptides By

Residue Number  Increasing Mass  Decreasing Mass

| Start - End | Observed | Mr(expt)  | Mr(calc)  | Delta  | Miss | Sequence                                                                                             |
|-------------|----------|-----------|-----------|--------|------|------------------------------------------------------------------------------------------------------|
| 150 - 173   | 818.1597 | 2451.4574 | 2451.0900 | 0.3674 | 0    | <b>K.DFMIQGGDFTEGNGTGGISlYGAk.F</b> Deamidated (NQ); Oxidation (M) ( <a href="#">Ions score 74</a> ) |
| 174 - 182   | 571.8838 | 1141.7530 | 1141.5291 | 0.2239 | 0    | <b>K.FEDENFTLK.H</b> ( <a href="#">Ions score 41</a> )                                               |

# gi|15218090 Mitochondrial processing peptidase alpha subunit, putative

Match to: gi|15218090 Score: 302

mitochondrial processing peptidase alpha subunit, putative [Arabidopsis thaliana]

Found in search of C:\QStar Share Data\20091115MMZ\NOV15\1102NOV15.wiff

Nominal mass ( $M_r$ ): 54539; Calculated pI value: 5.94

NCBI BLAST search of [gi|15218090](#) against nr

Unformatted [sequence string](#) for pasting into other applications

Taxonomy: [Arabidopsis thaliana](#)

Fixed modifications: Carbamidomethyl (C)

Variable modifications: Oxidation (M), Phospho (ST)

Cleavage by Trypsin: cuts C-term side of KR unless next residue is P

Sequence Coverage: 10%

Matched peptides shown in **Bold Red**

```
1 MYRTAASRAR ALKGVLTRSL RPARYASSSA VAETSSSTPA YLSWLSGGSR
51 AALTSLDMPL QGVSLPPPLA DKVEPSKLQI TTLPGLKIA SETTPNPAAS
101 IGLYVDCGSI YEAPYFHGAT HLLERMAFKS TLNRTHFRLV REIEAIGGNT
151 SASASREQMS YTIDALKTYV PEMVEVLIDS VRNPFLDWE VNEELRKMKV
201 EIAELAKNPM GFLLEAIHSA GYSGPLASPL YAPESALDRL NGELLEEFMT
251 ENFTAARMVL AASGVEHEEL LKVAEPLTSD LPNVPPQLAP KSQYVGGDFR
301 QHTGGGEATHF AVAFEVPGWN NEKEAVTATV LQMLMGGGGS FSAGGPGKGM
351 HSWLYRRVLN EYQEVQSCA FTSIFNDTGL FGIYGCSSPQ FAKAIELAA
401 KELKDVAGGK VNQAHLDRAK AATKSAVLMN LESRMIAAED IGRQILTYGE
451 RKPVDQFLKS VDQLTLKDIA DFTSKVISKP LTMGSFGDVL AVPSYDTISS
501 KFR
```

Show predicted peptides also

Sort Peptides By

Residue Number  Increasing Mass  Decreasing Mass

| Start - End | Observed | Mr(expt)  | Mr(calc)  | Delta  | Miss | Sequence                                                               |
|-------------|----------|-----------|-----------|--------|------|------------------------------------------------------------------------|
| 142 - 156   | 731.8974 | 1461.7802 | 1461.7059 | 0.0742 | 0    | <b>R.EIEAIGGNTSASASR.E</b> ( <a href="#">Ions score 84</a> )           |
| 157 - 167   | 657.8490 | 1313.6834 | 1313.6173 | 0.0661 | 0    | <b>R.EQMSYTIDALK.T</b> Oxidation (M) ( <a href="#">Ions score 60</a> ) |
| 425 - 434   | 560.3282 | 1118.6418 | 1118.5754 | 0.0664 | 0    | <b>K.SAVLMNLESR.M</b> ( <a href="#">Ions score 57</a> )                |
| 425 - 434   | 568.3238 | 1134.6331 | 1134.5703 | 0.0628 | 0    | <b>K.SAVLMNLESR.M</b> Oxidation (M) ( <a href="#">Ions score 64</a> )  |
| 435 - 443   | 496.2815 | 990.5485  | 990.4804  | 0.0681 | 0    | <b>R.MIAAEDIGR.Q</b> Oxidation (M) ( <a href="#">Ions score 52</a> )   |
| 444 - 451   | 490.3031 | 978.5916  | 978.5134  | 0.0782 | 0    | <b>R.QILTYGER.K</b> ( <a href="#">Ions score 43</a> )                  |



# gi|38154485 Molecular chaperone Hsp90-2

## Protein View

Match to: gi|38154485 Score: 145

molecular chaperone Hsp90-2 [Nicotiana benthamiana]

Found in search of C:\QStar Share Data\20091115MMZ\NOV16\389NOV15.wiff

Nominal mass ( $M_r$ ): 80430; Calculated pI value: 4.98

NCBI BLAST search of [gi|38154485](#) against nr

Unformatted [sequence string](#) for pasting into other applications

Taxonomy: [Nicotiana benthamiana](#)

Fixed modifications: Carbamidomethyl (C)

Variable modifications: Oxidation (M), Phospho (ST)

Cleavage by Trypsin: cuts C-term side of KR unless next residue is P

Sequence Coverage: 3%

Matched peptides shown in **Bold Red**

```
1 MAEAETFAFQ AEINQLLSLI INTFYSNKEI FLRELISNSS DALDKIRFES
51 LTDKSKLDAQ PELFIHIIPD KTNNTLTIID SGIGMTKADL VNNLGTIARS
101 GTKEFMEALA AGADVSMIGQ FGVGFYSAYL VAERVVVTTK HNDDEQYVWE
151 SQAGGSFTVT RDTSGENLGR GTKITLFLKE DQLEYLEERR LKDLVKKHSE
201 FISYPISLWV EKTIEKEISD DEDEEEKKDE EGKVGEVDEE KEKEEKKKKK
251 IKEVSNEWSL VNKQKPIWMR KPPEITKEYY AAFYKSLTND WEEHLAVKHF
301 SVEGQLEFKA VLFVPKRAPF DLFDTKKKPN NIKLYVRRVF IMDNCEELIP
351 EYLSFVKGIV DSEDLPLNIS REMLQQNKIL KVIRKNLVKK CIELFFEIAE
401 NKEDYDKFYE AFSKNLKLGI HEDSQNRSKF AELLRYHSTK SGDEMTSLKD
451 YVTRMKEGQN DIYYITGESK KAVENSPFLE KLKKKGVEVL YMVDAIDEYS
501 VGQLKEFEGK KLVSATKEGL KLDESEDEKK KHEELKEKFE GLCKVIKDVL
551 GDKVEKVVVS DRVVDSPCCL VTGEYGWTAN MERIMKAQAL RDTSMAGYMS
601 SKKTMEINPE NAIMEELRKR ADADKNDKSV KDLVLLLFET ALLTSGFSLD
651 EPNTFGNRIH RMLKLGLSID EDCGDAEADM PPLEDPEADA EGSKMEEVD
```

Show predicted peptides also

Sort Peptides By

Residue Number  Increasing Mass  Decreasing Mass

| Start - End | Observed | Mr (expt) | Mr (calc) | Delta  | Miss | Sequence                                                  |
|-------------|----------|-----------|-----------|--------|------|-----------------------------------------------------------|
| 34 - 45     | 646.3472 | 1290.6799 | 1290.6303 | 0.0496 | 0    | <b>R.ELISNSSDALDK.I</b> ( <a href="#">Ions score 73</a> ) |
| 180 - 189   | 662.3333 | 1322.6521 | 1322.5990 | 0.0531 | 0    | <b>K.EDQLEYLEER.R</b> ( <a href="#">Ions score 72</a> )   |

# gi|15222729 Chaperonin 60 beta (CPN60B)

## Protein View

Match to: gi|15222729 Score: 185

CPN60B (CHAPERONIN 60 BETA); ATP binding / protein binding / unfolded protein binding [Arabidopsis thaliana]

Found in search of C:\QStar Share Data\20091115MMZ\NOV15\712NOV15.wiff

Nominal mass ( $M_r$ ): 64169; Calculated pI value: 6.21

NCBI BLAST search of [gi|15222729](#) against nr

Unformatted [sequence string](#) for pasting into other applications

Taxonomy: [Arabidopsis thaliana](#)

Fixed modifications: Carbamidomethyl (C)

Variable modifications: Oxidation (M), Phospho (ST)

Cleavage by Trypsin: cuts C-term side of KR unless next residue is P

Sequence Coverage: 8%

Matched peptides shown in **Bold Red**

```
1 MASTFTATSS IGSMVAPNGH KSDKKLISKL SSSSFGRQSQ VCPRPRSSSS
51 AIVCAAKELH FNKDGTTIRR LQAGVNLAD LVGVTLGPKG RNVVLESKYG
101 SPRIVNDGVT VAREVELEDP VENIGAKLVR QAAAKTNDLA GDGTTTSVVL
151 AQGFAIEGVK VVAAGANPVL ITRGIEKTAK ALVTELKMS KEVEDSELAD
201 VAAVSAGNND EIGNMIAEAM SKVGRKGVVT LEEGKSAENN LYVVEGMQFD
251 RGYISPYFVT DSEKMSVEFD NCKLLLVDK ITNARDLVGV LEDAIRGGYP
301 ILIIAEDIEQ EALATLVVNK LRGTLKIAAL RAPGFGERKS QYLDDIAILT
351 GATVIREEVG LSLDKAGKEV LGNASKVVLT KETSTIVGDG STQDAVKKRV
401 TQIKNLIEQA EQDYEKEKLN ERIAKLSGGV AVIQVGAQTE TELKEKKLRV
451 EDALNATKAA VEEGIVVGGG CTLLRLASKV DAIKATLDND EEKVGADIVK
501 RALSYPLKLI AKNAGVNGSV VSEKVLSDN VKFGYNAATG KYEDLMAAGI
551 IDPTKVVRCC LEHAASVAKT FLMSDCVVVE IKEPEPVPVG NPMDNSGYGY
601
```

Show predicted peptides also

Sort Peptides By

Residue Number  Increasing Mass  Decreasing Mass

| Start - End | Observed | Mr(expt)  | Mr(calc)  | Delta  | Miss | Sequence                                                       |
|-------------|----------|-----------|-----------|--------|------|----------------------------------------------------------------|
| 78 - 89     | 591.8794 | 1181.7442 | 1181.7020 | 0.0422 | 0    | <b>K.LADLVGVTLGPK.G</b> ( <a href="#">Ions score 50</a> )      |
| 114 - 127   | 771.4247 | 1540.8348 | 1540.7620 | 0.0727 | 0    | <b>R.EVELEDPVENIGAK.L</b> ( <a href="#">Ions score 37</a> )    |
| 357 - 365   | 495.2876 | 988.5606  | 988.5077  | 0.0529 | 0    | <b>R.EEVGLSLDK.A</b> ( <a href="#">Ions score 54</a> )         |
| 382 - 398   | 579.3163 | 1734.9272 | 1734.8636 | 0.0636 | 1    | <b>K.ETSTIVGDGSTQDAVKK.R</b> ( <a href="#">Ions score 43</a> ) |

# gi|2511578 20S proteasome beta subunit; multicatalytic endopeptidase

## Protein View

Match to: gi|2511578 Score: 179

multicatalytic endopeptidase [Arabidopsis thaliana]

Found in search of D:\Sixue Chen-don't delete please\20091115MMZ\DEC01\2119.wiff

Nominal mass ( $M_r$ ): 29847; Calculated pI value: 6.66

NCBI BLAST search of [gi|2511578](#) against nr

Unformatted [sequence string](#) for pasting into other applications

Taxonomy: [Arabidopsis thaliana](#)

Fixed modifications: Carbamidomethyl (C)

Variable modifications: Deamidated (NQ), Gln->pyro-Glu (N-term Q), Oxidation (M)

Cleavage by Trypsin: cuts C-term side of KR unless next residue is P

Sequence Coverage: 15%

Matched peptides shown in **Bold Red**

```
1 MSQSTVDVPP KGGFSFDLCK RNDMLTPKGL KAPSFLKTGT TIVGLIFKDG
51 VILGADTRAT EGPVADKNC EKIHYMAPNI YCCGAGTAAD TEAVTDMVSS
101 QLRLHRYQTG RDSRVITALT LLKKHLFSYQ GHVSAALVLG GVDITGPHLH
151 TIYPHGSTDT LPFATMGSGS LAAMSVFEAK YKEGLTRDEG IKLVAESICS
201 GIFNDLGSGS NVDICVITKG NKEYLRNYME PNPRTYVSSK GYSFTKKTEV
251 LLTKITPLLE RVEITEVGEA MEE
```

Show predicted peptides also

Sort Peptides By

Residue Number  Increasing Mass  Decreasing Mass

| Start - End | Observed | Mr(expt)  | Mr(calc)  | Delta  | Miss | Sequence                       |                                   |
|-------------|----------|-----------|-----------|--------|------|--------------------------------|-----------------------------------|
| 49 - 58     | 508.8807 | 1015.7468 | 1015.5298 | 0.2170 | 0    | K.DGVILGADTR.A                 | ( <a href="#">Ions score 40</a> ) |
| 59 - 68     | 500.8666 | 999.7186  | 999.5237  | 0.1949 | 0    | R.ATEGPVADK.N                  | ( <a href="#">Ions score 71</a> ) |
| 115 - 123   | 486.4262 | 970.8378  | 970.6427  | 0.1951 | 0    | R.VITALTLLK.K                  | ( <a href="#">Ions score 39</a> ) |
| 262 - 273   | 676.4117 | 1350.8089 | 1350.5861 | 0.2228 | 0    | R.VEITEVGEAMEE.- Oxidation (M) | ( <a href="#">Ions score 29</a> ) |

# gi|3421087 20S proteasome subunit PAE1

## Protein View

Match to: gi|3421087 Score: 61

20S proteasome subunit PAE1 [Arabidopsis thaliana]

Found in search of D:\Sixue Chen-don't delete please\20091115MMZ\DEC01\2315DEC04.wiff

Nominal mass (M<sub>r</sub>): 26102; Calculated pI value: 4.70

NCBI BLAST search of [gi|3421087](#) against nr

Unformatted [sequence string](#) for pasting into other applications

Taxonomy: [Arabidopsis thaliana](#)

Fixed modifications: Carbamidomethyl (C)

Variable modifications: Deamidated (NQ), Gln->pyro-Glu (N-term Q), Oxidation (M)

Cleavage by Trypsin: cuts C-term side of KR unless next residue is P

Sequence Coverage: 13%

Matched peptides shown in **Bold Red**

```
1 MFLTRTEYDR GVNTFSPEGR LFQVEYAIEA IKLGSTAIGV KTKEGVVLAV
51 EKRITSPLE PSSVEKIMEI DDHIGCAMSG LIADARTLVE HARVETQNR
101 FSYGEPMTVE STTQALCDLA LRFGEGEREES MSRPFVGSLL IAGHDENGPS
151 LYYTDPSGTF WQCNKAIGS GSEGADSSLQ EQFNKDLSLQ EAETIAVSIL
201 KQVMEEKVTP NNVDIAKVAP AYHLYTPQEV EAVIARL
```

Show predicted peptides also

Sort Peptides By

Residue Number  Increasing Mass  Decreasing Mass

| Start - End | Observed | Mr(expt)  | Mr(calc)  | Delta  | Miss | Sequence                                                         |
|-------------|----------|-----------|-----------|--------|------|------------------------------------------------------------------|
| 54 - 66     | 700.5512 | 1399.0879 | 1398.7606 | 0.3273 | 0    | <b>R.ITSPLEPSSVEK.I</b> ( <a href="#">Ions score 51</a> )        |
| 167 - 185   | 963.1168 | 1924.2191 | 1923.8810 | 0.3381 | 0    | <b>K.AIGSGSEGADSSLQEQFNK.D</b> ( <a href="#">Ions score 10</a> ) |

# gi|166830 Proteasome

## Protein View

Match to: gi|166830 Score: 243

proteasome

Found in search of D:\Sixue Chen-don't delete please\20091115MMZ\DEC01\1944.wiff

Nominal mass ( $M_r$ ): 30685; Calculated pI value: 4.99

NCBI BLAST search of [gi|166830](#) against nr

Unformatted [sequence string](#) for pasting into other applications

Taxonomy: [Arabidopsis thaliana](#)

Fixed modifications: Carbamidomethyl (C)

Variable modifications: Deamidated (NQ), Gln->pyro-Glu (N-term Q), Oxidation (M)

Cleavage by Trypsin: cuts C-term side of KR unless next residue is P

Sequence Coverage: 19%

Matched peptides shown in **Bold Red**

```
1 MFRNQYDTDV TTWSPTGRLF QVEYAMEAVK QGSAAIGLRS RSHVVLACVN
51 KAQSELSSHQ RKIFKVDDHI GVAIAGLTAD GRVLSRYMRS ESINHSFTYE
101 SPLPVGRLV HLADKAQVCT QRSWKRPYGV GLLVGGLDES GAHLYNCPS
151 GNYFEYQAF AIGSRSQAKT YLERRFESFG DSSREDLIKD AILAVRETLQ
201 GETLKSSLCT VAILGVDEPF HFLDQEAIQK VIDTFEKVPE EEEGEGEAGE
251 GEAEAAEAAP AERGGGVAGD QDVAPMEM
```

Show predicted peptides also

Sort Peptides By

Residue Number  Increasing Mass  Decreasing Mass

| Start - End | Observed | Mr (expt) | Mr (calc) | Delta  | Miss | Sequence                                                                  |
|-------------|----------|-----------|-----------|--------|------|---------------------------------------------------------------------------|
| 4 - 18      | 871.0187 | 1740.0228 | 1739.7751 | 0.2477 | 0    | R.NQYD <b>TDVTTWSPTGR</b> .L ( <a href="#">Ions score 61</a> )            |
| 19 - 30     | 714.4790 | 1426.9435 | 1426.7166 | 0.2269 | 0    | R.LFQVEY <b>AMEAVK</b> .Q ( <a href="#">Ions score 46</a> )               |
| 19 - 30     | 722.4839 | 1442.9532 | 1442.7115 | 0.2417 | 0    | R.LFQVEY <b>AMEAVK</b> .Q Oxidation (M) ( <a href="#">Ions score 40</a> ) |
| 66 - 82     | 560.7403 | 1679.1992 | 1678.8639 | 0.3353 | 0    | K.VDDHIG <b>VAIAGLTADGR</b> .V ( <a href="#">Ions score 80</a> )          |
| 197 - 205   | 509.8781 | 1017.7417 | 1017.5342 | 0.2074 | 0    | R.ETLQ <b>GETLK</b> .S ( <a href="#">Ions score 56</a> )                  |

# gi|22331799 ATPDIL1-3 (PDI-LIKE 1-3); thiol-disulfide exchange intermediate

Match to: gi|22331799 Score: 135

ATPDIL1-3 (PDI-LIKE 1-3); thiol-disulfide exchange intermediate [Arabidopsis thaliana]

Found in search of C:\QStar Share Data\20091115MMZ\NOV15\333NOV15.wiff

Nominal mass ( $M_r$ ): 64400; Calculated pI value: 4.74

NCBI BLAST search of [gi|22331799](#) against nr

Unformatted [sequence string](#) for pasting into other applications

Taxonomy: [Arabidopsis thaliana](#)

Links to retrieve other entries containing this sequence from NCBI Entrez:

[gi|18072841](#) from [Arabidopsis thaliana](#)

[gi|20260432](#) from [Arabidopsis thaliana](#)

[gi|23197928](#) from [Arabidopsis thaliana](#)

Fixed modifications: Carbamidomethyl (C)

Variable modifications: Oxidation (M), Phospho (ST)

Cleavage by Trypsin: cuts C-term side of KR unless next residue is P

Sequence Coverage: 3%

Matched peptides shown in **Bold Red**

```
1 MASSSTSISL LLFVSFILL VNSRAENASS GSDLDEELAF LAEESKEQS
51 HGGGSYHEEE HDHQHRDFEN YDDLEQGGGE FHHGDHGYEE EPLPPVDEKD
101 VAVLTKDNFT EFGVNNFAM VEFYAPWCGA CQALTPEYAA AATELKGLAA
151 LAKIDATEEG DLAQKYEIQG FPTVFLFVDG EMRKYEGER TKDGIVTWLK
201 KKASPSIHNI TTKEEAERVL SAEPKLVFGF LNSLVGSESE ELAAASRLD
251 DLSFYQTASP DIAKFEIET QVKRPALVLL KKEEEKLARF DGNFTKTAIA
301 EFSVANKVPL VINFREGAS LIFESSVKNQ LILFAKANES EKHLPTLREV
351 AKSFKGKVFV VYVQMDNEDY GEAVSGFFGV TGAAPKVLVY TGNEDMRKFI
401 LDGELTVNNI KTLAEDFLAD KLKPFYKSDP LPENNDGDVK VIVGNNFDEI
451 VLDESKDVLL EIYAPWCGHC QSFEPYINYL GKYLKIDSL VVAKMDGTSN
501 EHPRAKADGF PTILFFPGGN KSFDPPIAVDV DRTVVELYKF LKKHASIPFK
551 LEKPATPEPV ISTMKSDEKI EGDSSKDEL
```

Show predicted peptides also

Sort Peptides By

Residue Number  Increasing Mass  Decreasing Mass

| Start - End | Observed | Mr (expt) | Mr (calc) | Delta  | Miss | Sequence                                                  |
|-------------|----------|-----------|-----------|--------|------|-----------------------------------------------------------|
| 154 - 165   | 645.3376 | 1288.6606 | 1288.6147 | 0.0459 | 0    | <b>K.IDATEEGDLAQK.Y</b> ( <a href="#">Ions score 72</a> ) |
| 412 - 421   | 561.8191 | 1121.6236 | 1121.5604 | 0.0631 | 0    | <b>K.TLAEDFLADK.L</b> ( <a href="#">Ions score 64</a> )   |

# gi|219687002 Daikon cysteine protease RD21

## Protein View

Match to: gi|219687002 Score: 218

daikon cysteine protease RD21 [Raphanus sativus]

Found in search of C:\QStar Share Data\20091115MMZ\NOV26\1767NOV26.wiff

Nominal mass ( $M_r$ ): 32085; Calculated pI value: 4.57

NCBI BLAST search of [gi|219687002](#) against nr

Unformatted [sequence string](#) for pasting into other applications

Taxonomy: [Raphanus sativus](#)

Fixed modifications: Carbamidomethyl (C)

Variable modifications: Deamidated (NQ), Gln->pyro-Glu (N-term Q), Oxidation (M)

Cleavage by Trypsin: cuts C-term side of KR unless next residue is P

Sequence Coverage: 16%

Matched peptides shown in **Bold Red**

```
1 DAIPESVDWR KEGAVAAVKD QGSCGSCWAF STIGAVEGIN KIVTGDLSL
51 SEQELVDCDT SYNQGCNGGL MDYAFEFIK NGGIDTEEDY PYKAADGRCD
101 QNRKNAKVVT IDAYEDVPEN NEAALKKALA NQPISVAIEA GGRAFLYSS
151 GVFDGTCGTE LDHGVVAVGY GTENKDYWI VRNSWGGSWG ESGYIKMARN
201 IAEATGKCGI AMEASYPIKK GQNPPQPGPS PPSPIKPPTQ CDKYSCPEG
251 NTCCLFKYG KYCFGWGCCP LEAATCCDDN TSCCPHEYP
```

Show predicted peptides also

Sort Peptides By

Residue Number  Increasing Mass  Decreasing Mass

| Start - End | Observed | Mr (expt) | Mr (calc) | Delta  | Miss | Sequence                                                            |
|-------------|----------|-----------|-----------|--------|------|---------------------------------------------------------------------|
| 81 - 93     | 750.8949 | 1499.7752 | 1499.6416 | 0.1336 | 0    | K.NGGIDTEEDYPYK.A ( <a href="#">Ions score 74</a> )                 |
| 81 - 93     | 751.3842 | 1500.7539 | 1500.6256 | 0.1283 | 0    | K.NGGIDTEEDYPYK.A Deamidated (NQ) ( <a href="#">Ions score 61</a> ) |
| 108 - 126   | 697.4237 | 2089.2493 | 2089.0215 | 0.2278 | 0    | K.VVTIDAYEDVPENNEAALK.K ( <a href="#">Ions score 56</a> )           |
| 128 - 143   | 783.9479 | 1565.8813 | 1565.8525 | 0.0288 | 0    | K.ALANQPISVAIEAGGR.A ( <a href="#">Ions score 15</a> )              |
| 128 - 143   | 784.0104 | 1566.0063 | 1565.8525 | 0.1538 | 0    | K.ALANQPISVAIEAGGR.A ( <a href="#">Ions score 89</a> )              |

# gi|13124444 Phospholipase D alpha 1 (PLD1)

Match to: gi|13124444 Score: 270

RecName: Full=Phospholipase D alpha 1; Short=PLD 1; AltName: Full=Choline phosphatase 1

Found in search of C:\QStar Share Data\20091115MMZ\NOV15\322NOV15.wiff

Nominal mass ( $M_r$ ): 92236; Calculated pI value: 5.52

NCBI BLAST search of [gi|13124444](#) against nr

Unformatted [sequence string](#) for pasting into other applications

Taxonomy: [Brassica oleracea var. capitata](#)

Fixed modifications: Carbamidomethyl (C)

Variable modifications: Oxidation (M), Phospho (ST)

Cleavage by Trypsin: cuts C-term side of KR unless next residue is P

Sequence Coverage: 7%

Matched peptides shown in **Bold Red**

```
1 MAQHLLHGTL HATIYEVDDL HTGGLRSGFF GKILANVEET IGVGKGETQL
51 YATIDLQRRAR VGRTRKIKDE AKNPKWYESF HIYCAHLASD IIFTVKDDNP
101 IGATLIGRAY VPVDQVIHGE EVDQWVEILD NDRNPIHGGS KIHVKLQYFG
151 VEADRNWNQG IKSAKFPGVP YTFFSQRQGC KVSLYQDAHI PDNFVPRIPL
201 AGGKKNYEPQR CWEDIFDAIS NAQHMIYITG WSVYTEIALV RDSRRPKPGG
251 DVTVGELLKK KASEGVRVLL LVWDDRTSVD VLKKDGLMAT HDEETENFFR
301 GSDVHCILCP RNPDDGGSIV QNLQVSAMFT HHQKIVVVD S EMP SRGGSQM
351 RRIVSFVGGI DLCDGRYDTP FHSLFRTLDT VHHDDFHQPN FTGAAITKGG
401 PREPWHDIHS RLEGPIAWDV LYNFEQRWSK QGGKDILVKL RELSDIIITP
451 SPVMFQEDHD VWNVQLFRSI DGGAAAGFPE SPEAAAEAGL VSGKDNIIDR
501 SIQDAYIHAI RRAKDFIYIE NQYFLGSSFA WAADGITPED INALHLIPKE
551 LSLKIVSKIE KGEKFRVYV VPMWPEGLPE SASVQAILDW QRRTMQMMYK
601 DIVQALRAQG LEEDPRNYLT FFCLGNREVK KEGEYEP AER PDADSSYMKA
651 QEARRFMIYV HTKMMIVDDE YIIIGSANIN QRSMDGARDS EIAMGGYQPH
701 HLSHRQPARG QIHGFRMSLW YEHLGMLDET FLDPSSVECI EKVNRISDKY
751 WDLYSSESLE HDLPGHLLRY PVDVDGEGDV TEPFGFEFFP DTKARILGTK
801 SDYLPPILTT
```

Show predicted peptides also

Sort Peptides By

Residue Number  Increasing Mass  Decreasing Mass

| Start - End | Observed | Mr (expt) | Mr (calc) | Delta  | Miss | Sequence                                                         |
|-------------|----------|-----------|-----------|--------|------|------------------------------------------------------------------|
| 97 - 108    | 621.3648 | 1240.7150 | 1240.6412 | 0.0738 | 0    | K.DDNPIGATLIGR.A ( <a href="#">Ions score 80</a> )               |
| 146 - 155   | 599.3311 | 1196.6476 | 1196.5826 | 0.0650 | 0    | K.LQYFGVEADR.N ( <a href="#">Ions score 82</a> )                 |
| 469 - 494   | 787.0882 | 2358.2429 | 2358.1339 | 0.1090 | 0    | R.SIDGGAAAGFPESPEAAAEAGLVSGK.D ( <a href="#">Ions score 73</a> ) |
| 801 - 810   | 560.3387 | 1118.6629 | 1118.5859 | 0.0769 | 0    | K.SDYLPPILT <b>T</b> .- ( <a href="#">Ions score 35</a> )        |



# gi|30690210 Arabidopsis thaliana MAP kinase 12 (ATMPK12); MAP kinase

## Protein View

Match to: gi|30690210 Score: 131

ATMPK12 (Arabidopsis thaliana MAP kinase 12); MAP kinase/ kinase

Found in search of C:\QStar Share Data\20091115MMZ\NOV15\1193NOV15.wiff

Nominal mass ( $M_r$ ): 42904; Calculated pI value: 8.05

NCBI BLAST search of [gi|30690210](#) against nr

Unformatted [sequence string](#) for pasting into other applications

Taxonomy: [Arabidopsis thaliana](#)

Links to retrieve other entries containing this sequence from NCBI Entrez:

[gi|75151485](#) from [Arabidopsis thaliana](#)

[gi|26449987](#) from [Arabidopsis thaliana](#)

[gi|90093312](#) from [Arabidopsis thaliana](#)

Fixed modifications: Carbamidomethyl (C)

Variable modifications: Oxidation (M), Phospho (ST)

Cleavage by Trypsin: cuts C-term side of KR unless next residue is P

Sequence Coverage: 7%

Matched peptides shown in **Bold Red**

```
1 MSGESSSGST EHCIKVVPTH GGRYVQYNVY GQLFEVSRKY VPPIRPIGRG
51 ACGIVCAAVN SVTGEKVAIK KIGNAFDNII DAKRTLREIK LLRHMDHENV
101 ITIKDIVRPP QRDIFNDVYI VYELMDIDLQ RILRSNQTLT SDQCRFLVYQ
151 LLRGLKYVHS ANILHRDLRP SNVLLNSKNE LKIGDFGLAR TTSDTDFMTE
201 YVVTRWYRAP ELLLNCSEYT AADIWSVGC ILGEIMTGQP LFPGKDYVHQ
251 LRLITELVGS PDNSSLGFLR SDNARRYVRQ LPRYPKQQFA ARFPKMPTTA
301 IDLLERMLVF DPNRRISVDE ALGHAYLSPH HDVAKEPVCS TPFSDFEHP
351 SCTEEHIKEL IYKESVKFNP DH
```

Show predicted peptides also

Sort Peptides By

Residue Number  Increasing Mass  Decreasing Mass

| Start - End | Observed | Mr (expt) | Mr (calc) | Delta  | Miss | Sequence                                                                   |
|-------------|----------|-----------|-----------|--------|------|----------------------------------------------------------------------------|
| 72 - 83     | 645.8593 | 1289.7041 | 1289.6615 | 0.0425 | 0    | <b>K.IGNAFDNIIDAK.R</b> ( <a href="#">Ions score 72</a> )                  |
| 191 - 205   | 891.4123 | 1780.8100 | 1780.7826 | 0.0274 | 0    | <b>R.TTSDTDFMTEYVVTR.W</b> Oxidation (M) ( <a href="#">Ions score 59</a> ) |

# gi|395072 Guanine nucleotide regulatory protein (Ran2)

## Protein View

Match to: gi|395072 Score: 89

guanine nucleotide regulatory protein [Vicia faba]

Found in search of D:\Sixue Chen-don't delete please\20091115MMZ\DEC01\1944.wiff

Nominal mass ( $M_r$ ): 25616; Calculated pI value: 6.39

NCBI BLAST search of [gi|395072](#) against nr

Unformatted [sequence string](#) for pasting into other applications

Taxonomy: [Vicia faba](#)

Fixed modifications: Carbamidomethyl (C)

Variable modifications: Deamidated (NQ), Gln->pyro-Glu (N-term Q), Oxidation (M)

Cleavage by Trypsin: cuts C-term side of KR unless next residue is P

Sequence Coverage: 9%

Matched peptides shown in **Bold Red**

```
1 MALPNQQTVD YPSFKLVIVG DGGTGTKITFV KRHLTGEFEK KYEPTIGVEV
51 HPLDFFTNCG KIRFYCWDTA GQEKFGGLRD GYYIHGQCAI IMFDTVARTL
101 YKNVPTWHRD LCRVCENIPI VLCGNKVDVK NRQVKAKQVT FHRKKNLQYY
151 EISAKSNYNF EKPFLYLARK LAGDANLHFV ESPALAPPEV QIDIALQQRH
201 ENEILEAANQ PLPDDDDDAF E
```

Show predicted peptides also

Sort Peptides By

Residue Number  Increasing Mass  Decreasing Mass

| Start - End | Observed | Mr(expt)  | Mr(calc)  | Delta  | Miss | Sequence                |                                 |
|-------------|----------|-----------|-----------|--------|------|-------------------------|---------------------------------|
| 16 - 26     | 508.3974 | 1014.7803 | 1014.5710 | 0.2093 | 0    | <b>K.LVIVGDGGTGTK.T</b> | <a href="#">(Ions score 62)</a> |
| 146 - 155   | 614.9276 | 1227.8407 | 1227.6135 | 0.2272 | 0    | <b>K.NLQYYEISAK.S</b>   | <a href="#">(Ions score 28)</a> |

# gi|159462486 Predicted protein, containing calcium binding motif

## Protein View

Match to: gi|159462486 Score: 67

predicted protein [Chlamydomonas reinhardtii]

Found in search of C:\QStar Share Data\20091115MMZ\NOV15\153NOV15.wiff

Nominal mass (M<sub>r</sub>): 36689; Calculated pI value: 8.61

NCBI BLAST search of [gi|159462486](#) against nr

Unformatted [sequence string](#) for pasting into other applications

Taxonomy: [Chlamydomonas reinhardtii](#)

Links to retrieve other entries containing this sequence from NCBI Entrez:

[gi|158283461](#) from [Chlamydomonas reinhardtii](#)

Fixed modifications: Carbamidomethyl (C)

Variable modifications: Oxidation (M), Phospho (ST)

Cleavage by Trypsin: cuts C-term side of KR unless next residue is P

Sequence Coverage: 2%

Matched peptides shown in **Bold Red**

```
1 MQLARTLNFG ARPRAISQRA CIAPARIRTR VVRCRADGKE TDSKTDSKKL
51 DSSLDELQKS GVDSKKAQAV LKKWKELGVE DSEQLRKLLV KRSLRPAGIV
101 AFQAALDGLA CWGGFYTSGL IADSPFFTQ FPLQLLASFF GFYYVLQGLL
151 NLSVASTLAF TAYKYGTNSV ELLAAVQQLA GPATGLNVLD RAQVGRGVNT
201 LKVLQTLDEI AELLKNMSFA SSQRSTLQNL SAYLQLSHAR ETLGFDPARY
251 GLTAAEAGEI AYVFSCYDKN EDYRLELSEV KRLCQDLGKE LSDEEYKEAL
301 RLLDTSKNGF VEFDEFCAWW TSKGAATTA
```

Show predicted peptides also

Sort Peptides By

Residue Number  Increasing Mass  Decreasing Mass

| Start - End | Observed | Mr(expt) | Mr(calc) | Delta  | Miss | Sequence     |                                   |
|-------------|----------|----------|----------|--------|------|--------------|-----------------------------------|
| 275 - 282   | 487.3028 | 972.5910 | 972.5604 | 0.0307 | 1    | R.LELSEVKR.L | ( <a href="#">Ions score 67</a> ) |
| 275 - 282   | 487.3028 | 972.5910 | 972.5604 | 0.0307 | 1    | R.LELSEVKR.L | ( <a href="#">Ions score 67</a> ) |

# gi|1063415 Potassium channel protein

## Protein View

Match to: gi|1063415 Score: 62

K<sup>+</sup> channel protein

Found in search of C:\QStar Share Data\20091115MMZ\NOV17\1771NOV17.wiff

Nominal mass ( $M_r$ ): 36596; Calculated pI value: 8.22

NCBI BLAST search of [gi|1063415](#) against nr

Unformatted [sequence string](#) for pasting into other applications

Taxonomy: [Arabidopsis thaliana](#)

Fixed modifications: Carbamidomethyl (C)

Variable modifications: Oxidation (M), Phospho (ST)

Cleavage by Trypsin: cuts C-term side of KR unless next residue is P

Sequence Coverage: 3%

Matched peptides shown in **Bold Red**

```
1 MQYKNLGKSG LKVSTLSFGA WVTFGNQLDV KEAKSILQCC RDHGVNFFDN
51 AEVYANGRAE EIMGQAIREL GWRRSDIVIS TKIFWGGPGP NDKGLSRKHI
101 VEGTKASLKR LDMDYVDVLY CHRPDASTPI EEAVRAMNYV IDKGWAFYWG
151 ISEWSAQQIT EAWGAADRLD LVGPIVEQPE YNMFARHKVE TEFLPLYTNH
201 GIGLTTWSPL ASGVLTKGYN KGAIPSDSRF ALENYKNLAN RSLVDDVLRK
251 VSGLKPIAGE LGVTLAQLAI AWCASNPNVS SVITGATRGS QIQENMKAVD
301 VIPLLTPIVL DKIEQVIQSK PKRPESYR
```

Show predicted peptides also

Sort Peptides By

Residue Number  Increasing Mass  Decreasing Mass

| Start - End | Observed | Mr(expt)  | Mr(calc)  | Delta  | Miss | Sequence                                                       |
|-------------|----------|-----------|-----------|--------|------|----------------------------------------------------------------|
| 59 - 68     | 567.3452 | 1132.6758 | 1132.5546 | 0.1212 | 0    | R.AEEIMGQAIR.E Oxidation (M) ( <a href="#">Ions score 62</a> ) |

## Peptide View

MS/MS Fragmentation of **AEEIMGQAIR**

Found in **gi|1063415**, K<sup>+</sup> channel protein

| #         | b               | b <sup>++</sup> | b <sup>*</sup> | b <sup>*++</sup> | b <sup>0</sup>  | b <sup>0++</sup> | Seq.     | y               | y <sup>++</sup> | y <sup>*</sup> | y <sup>*++</sup> | y <sup>0</sup>  | y <sup>0++</sup> | #         |
|-----------|-----------------|-----------------|----------------|------------------|-----------------|------------------|----------|-----------------|-----------------|----------------|------------------|-----------------|------------------|-----------|
| <b>1</b>  | 72.0444         | 36.5258         |                |                  |                 |                  | <b>A</b> |                 |                 |                |                  |                 |                  | <b>10</b> |
| <b>2</b>  | <b>201.0870</b> | 101.0471        |                |                  | 183.0764        | 92.0418          | <b>E</b> | <b>998.5265</b> | 499.7669        | 981.5000       | 491.2536         | 980.5160        | 490.7616         | <b>9</b>  |
| <b>3</b>  | <b>330.1296</b> | 165.5684        |                |                  | 312.1190        | 156.5631         | <b>E</b> | <b>869.4839</b> | 435.2456        | 852.4574       | 426.7323         | <b>851.4734</b> | <b>426.2403</b>  | <b>8</b>  |
| <b>4</b>  | 443.2136        | 222.1105        |                |                  | 425.2031        | 213.1052         | <b>I</b> | <b>740.4414</b> | 370.7243        | 723.4148       | 362.2110         |                 |                  | <b>7</b>  |
| <b>5</b>  | <b>526.2508</b> | 263.6290        |                |                  | <b>508.2402</b> | 254.6237         | <b>M</b> | <b>627.3573</b> | 314.1823        | 610.3307       | 305.6690         |                 |                  | <b>6</b>  |
| <b>6</b>  | 583.2722        | 292.1397        |                |                  | 565.2617        | 283.1345         | <b>G</b> | <b>544.3202</b> | 272.6637        | 527.2936       | 264.1504         |                 |                  | <b>5</b>  |
| <b>7</b>  | 711.3308        | 356.1690        | 694.3043       | 347.6558         | 693.3202        | 347.1638         | <b>Q</b> | <b>487.2987</b> | 244.1530        | 470.2722       | 235.6397         |                 |                  | <b>4</b>  |
| <b>8</b>  | 782.3679        | 391.6876        | 765.3414       | 383.1743         | 764.3573        | 382.6823         | <b>A</b> | <b>359.2401</b> | 180.1237        | 342.2136       | 171.6104         |                 |                  | <b>3</b>  |
| <b>9</b>  | 895.4520        | 448.2296        | 878.4254       | 439.7164         | 877.4414        | 439.2243         | <b>I</b> | 288.2030        | 144.6051        | 271.1765       | 136.0919         |                 |                  | <b>2</b>  |
| <b>10</b> |                 |                 |                |                  |                 |                  | <b>R</b> | <b>175.1190</b> | 88.0631         | 158.0924       | 79.5498          |                 |                  | <b>1</b>  |

# gi|123656 Chloroplast envelope membrane 70 kDa heat shock-related protein

Match to: gi|123656 Score: 65

RecName: Full=Chloroplast envelope membrane 70 kDa heat shock-related protein

Found in search of C:\QStar Share Data\20091115MMZ\NOV15\478NOV15.wiff

Nominal mass ( $M_r$ ): 72143; Calculated pI value: 5.34

NCBI BLAST search of [gi|123656](#) against nr

Unformatted [sequence string](#) for pasting into other applications

Taxonomy: [Spinacia oleracea](#)

Links to retrieve other entries containing this sequence from NCBI Entrez:

[gi|21338](#) from [Spinacia oleracea](#)

Fixed modifications: Carbamidomethyl (C)

Variable modifications: Oxidation (M), Phospho (ST)

Cleavage by Trypsin: cuts C-term side of KR unless next residue is P

Sequence Coverage: 1%

Matched peptides shown in **Bold Red**

```
1  MAGKGEGPAI  GIDLGTTYSR  VGVWQHDRV  E  IANDQGNRT  TPSYVAFTDS
51 ERLIGDAAKN  QVAMNPINTV  FDAKRLIGRR  FSDASVQADM  KHRPFKVVSG
101 PGEKPMIGVN  YKGEKQFAA  EEISSMVLTK  MKEIAEAYLG  STVKNNAVTV
151 PAYFNDSQRQ  ATKDAGVISG  LNVMRIINEP  TAAAIAYGLD  KKATSVGEKN
201 VLIFDLGGGT  FVSLLTIEE  GIFEVKATAG  DTHLGGEDFD  NRMVNHSLQE
251 FKRKNKKDIM  ETPGHIRRLR  TACERAKRTL  SSTAQTIEI  DSLYEGVDFY
301 SPITRARFEE  LNIDLFRKCM  EPVEKCLRDA  KMDKSTVHDV  VLVGGSTRIP
351 KVQQLLQDF  NGKELCKSIN  PDEAVAYGAA  VQAAILSGEG  NEKVQDLLL
401 DVTPLSLGLE  TAGGVMTVLI  PRNTTIPTKK  EQVFSTYSDN  QPGVLIQVYE
451 GERTRTRDNN  LLGKFELSGI  PPGPRGVPQI  NVCFDIDANG  ILNVS AEDKT
501 TGQKNKIRIT  NDKGRLSKEE  IEKMQEAEK  YKSEDEEHKK  KVESKNALEN
551 YAYNMRNIVK  DEKIGAKLSE  ADKKKIEEAI  DASIQWLDGN  QLAEAEFD
601 KMKELESICN  PIIAKMYQGA  GGDMGGGMED  EGPTSGGGAG  PKIEECLSC
651 HFF
```

Show predicted peptides also

Sort Peptides By

Residue Number  Increasing Mass  Decreasing Mass

| Start - End | Observed | Mr (expt) | Mr (calc) | Delta  | Miss | Sequence                                           |
|-------------|----------|-----------|-----------|--------|------|----------------------------------------------------|
| 40 - 52     | 737.3904 | 1472.7663 | 1472.6783 | 0.0879 | 0    | R.TPSYVAFTDSER.L ( <a href="#">Ions score 65</a> ) |

## Peptide View

MS/MS Fragmentation of **TTPSYVAFTDSER**

Found in [gi123656](#), RecName: Full=Chloroplast envelope membrane 70 kDa heat shock-related protein

| #                  | b               | b <sup>++</sup> | b <sup>0</sup>  | b <sup>0++</sup> | Seq.     | y                | y <sup>++</sup> | y <sup>*</sup> | y <sup>*++</sup> | y <sup>0</sup> | y <sup>0++</sup> | #                  |
|--------------------|-----------------|-----------------|-----------------|------------------|----------|------------------|-----------------|----------------|------------------|----------------|------------------|--------------------|
| <a href="#">1</a>  | 102.0550        | 51.5311         | 84.0444         | 42.5258          | <b>T</b> |                  |                 |                |                  |                |                  | <a href="#">13</a> |
| <a href="#">2</a>  | <b>203.1026</b> | 102.0550        | <b>185.0921</b> | 93.0497          | <b>T</b> | 1372.6379        | 686.8226        | 1355.6114      | 678.3093         | 1354.6274      | 677.8173         | <a href="#">12</a> |
| <a href="#">3</a>  | 300.1554        | 150.5813        | 282.1448        | 141.5761         | <b>P</b> | <b>1271.5903</b> | 636.2988        | 1254.5637      | 627.7855         | 1253.5797      | 627.2935         | <a href="#">11</a> |
| <a href="#">4</a>  | 387.1874        | 194.0974        | 369.1769        | <b>185.0921</b>  | <b>S</b> | <b>1174.5375</b> | 587.7724        | 1157.5109      | 579.2591         | 1156.5269      | 578.7671         | <a href="#">10</a> |
| <a href="#">5</a>  | 550.2508        | 275.6290        | 532.2402        | 266.6237         | <b>Y</b> | <b>1087.5055</b> | 544.2564        | 1070.4789      | 535.7431         | 1069.4949      | 535.2511         | <a href="#">9</a>  |
| <a href="#">6</a>  | 649.3192        | 325.1632        | 631.3086        | 316.1579         | <b>V</b> | <b>924.4421</b>  | 462.7247        | 907.4156       | 454.2114         | 906.4316       | 453.7194         | <a href="#">8</a>  |
| <a href="#">7</a>  | 720.3563        | 360.6818        | 702.3457        | 351.6765         | <b>A</b> | <b>825.3737</b>  | 413.1905        | 808.3472       | 404.6772         | 807.3632       | 404.1852         | <a href="#">7</a>  |
| <a href="#">8</a>  | 867.4247        | 434.2160        | 849.4141        | 425.2107         | <b>F</b> | <b>754.3366</b>  | 377.6719        | 737.3101       | 369.1587         | 736.3260       | 368.6667         | <a href="#">6</a>  |
| <a href="#">9</a>  | 968.4724        | 484.7398        | 950.4618        | 475.7345         | <b>T</b> | <b>607.2682</b>  | 304.1377        | 590.2416       | 295.6245         | 589.2576       | 295.1325         | <a href="#">5</a>  |
| <a href="#">10</a> | 1083.4993       | 542.2533        | 1065.4888       | 533.2480         | <b>D</b> | 506.2205         | 253.6139        | 489.1940       | 245.1006         | 488.2100       | 244.6086         | <a href="#">4</a>  |
| <a href="#">11</a> | 1170.5313       | 585.7693        | 1152.5208       | 576.7640         | <b>S</b> | <b>391.1936</b>  | 196.1004        | 374.1670       | 187.5871         | 373.1830       | 187.0951         | <a href="#">3</a>  |
| <a href="#">12</a> | 1299.5739       | 650.2906        | 1281.5634       | 641.2853         | <b>E</b> | 304.1615         | 152.5844        | 287.1350       | 144.0711         | 286.1510       | 143.5791         | <a href="#">2</a>  |
| <a href="#">13</a> |                 |                 |                 |                  | <b>R</b> | <b>175.1190</b>  | 88.0631         | 158.0924       | 79.5498          |                |                  | <a href="#">1</a>  |

# gi|14596025 P-Protein - like protein

Match to: gi|14596025 Score: 69

P-Protein - like protein [Arabidopsis thaliana]

Found in search of C:\QStar Share Data\20091115MMZ\NOV16\158NOV16.wiff

Nominal mass ( $M_r$ ): 113852; Calculated pI value: 6.51

NCBI BLAST search of [gi|14596025](#) against nr

Unformatted [sequence string](#) for pasting into other applications

Taxonomy: [Arabidopsis thaliana](#)

Fixed modifications: Carbamidomethyl (C)

Variable modifications: Oxidation (M), Phospho (ST)

Cleavage by Trypsin: cuts C-term side of KR unless next residue is P

Sequence Coverage: 1%

Matched peptides shown in **Bold Red**

```
1 MERARRLAYR GIVKRLVNDT KRHRNAETPH LVPHAPARYV SLSPPFISTP
51 RSVNHTAAFQ RHQQTRSISV DAVKPSDFFP RRHNSATPDE QTHMAKFCGF
101 DHIDSLIDAT VPKSIRLDSM KFSKFDAGLT ESQMIQHMDV LASKNKVFKS
151 FIGMGYYNTH VPTVILRNIM ENPAWYTQYT PYQAEISQGR LESLLNFQTV
201 ITDLTGLPMS NASLLDEGTA AAEAMAMCNN ILKGGKKTFF IASNCHPQTI
251 DVCKTRADGF DLKVVVTSDLK DIDYSSGDVC GVLVQYPGTE GEVLDYAEFV
301 KNAHANGVKV VMATDLLALT VLKPPGEFGA DIVVGSARFQ GVPMGYGGPH
351 AAFLATSQEY KRMPGRIIG ISVDSSGKQA LRMAMQTREQ HIRRDKATSN
401 ICTAQALLAN MAAMYAVYHG PAGLKSIAQR VHGLAGIFSL GLNKLGVAEV
451 QELPFFDFTVK IKCSDAHAIA DAASKSEINL RVVDSTTITA SFDETTLDD
501 VDKLKFVFAS GKPVFPTAES LAPEVQNSIP SSLTRESPYL THPIFNMVHT
551 EHELLRYIHK LQSKDLSLCH SMIPLGSCM KLNATTEMP VTWPSFTDIH
601 PFAPVEQAQG YQEMFENLGD LLCTITGFDS FSLQPNAGAA GEYAGLMVIR
651 AYHMSRGDHH RNVCIIPVSA HGTNPASAAM CGMKIITVGT DAKGNINIEE
701 VRKAAEANKD NLAALMVTYP STHGVEEYEG DEICNIIHEN GGQVYMDGAN
751 MNAQVGLTSP GFIGADVCHL NLHKTFCIPH GGGGPGMGPI GVKNHLPFL
801 PSHPVPTGG IPQPEKTAPL GAISAAPWGS ALILPISYTY IAMMGSGGLT
851 DASKIAILNA NYMAKRLEKH YPVLFRVNG TVAHEFIIDL RGFKNNTAGIE
901 PEDVAKRLMD YGFHGPTMSW PVPGLTMIEP TESESKAELD RFDALISIR
951 EEIAQIEKGN ADVQNNVLKG APHPPSLLMA DTWKKPYSRE YAAFPAPWLR
1001 SSKFWPTTGR VDNVYGDRKL VCTLLPEEQ VTAAVSA
```

Show predicted peptides also

Sort Peptides By

Residue Number  Increasing Mass  Decreasing Mass

| Start - End | Observed | Mr (expt) | Mr (calc) | Delta  | Miss | Sequence                                          |
|-------------|----------|-----------|-----------|--------|------|---------------------------------------------------|
| 951 - 958   | 480.3021 | 958.5896  | 958.4971  | 0.0925 | 0    | R.EEIAQIEK.G ( <a href="#">Ions score 32</a> )    |
| 959 - 969   | 586.3428 | 1170.6711 | 1170.5993 | 0.0718 | 0    | K.GNADVQNNVLK.G ( <a href="#">Ions score 38</a> ) |



# gi|223638918 Unnamed protein product, containing pfam00153 domain

## Protein View

Match to: gi|223638918 Score: 122  
unnamed protein product [Brassica napus]  
Found in search of C:\QStar Share Data\20091115MMZ\NOV26\1767NOV26.wiff

Nominal mass ( $M_r$ ): 32397; Calculated pI value: 9.35  
NCBI BLAST search of [gi|223638918](#) against nr  
Unformatted [sequence string](#) for pasting into other applications

Taxonomy: [Brassica napus](#)

Fixed modifications: Carbamidomethyl (C)  
Variable modifications: Deamidated (NQ), Gln->pyro-Glu (N-term Q), Oxidation (M)  
Cleavage by Trypsin: cuts C-term side of KR unless next residue is P  
Sequence Coverage: 8%

Matched peptides shown in **Bold Red**

```
1 MAEEKKVAPI GWNNTVKPFV NGGASGMLAT CVIQPIDMIK VRIQLGQGSA
51 VSVTKNMLKN DGIGAFYKGL SAGLLRQATY TTARLGSEFKM LTAKAIEAND
101 GKPLPLYQKA LCGLTAGAIG ACVGGSPADLA LIRMQADNTL PLAQRRNYTN
151 AFHALYRISA DEGVLALWKG CGPTVVVRAA LNMGMLASYD QSAEYMRDNL
201 GLGETSTVVG ASAVSGFCAA ACSLPDFDFVK TQIQKMQPDA QGKYPYTGSL
251 DCAMQTLKSG GPLKFYTGFP VYCVRIAPHV MMTWIFLNQI TKFQKTIGL
```

Show predicted peptides also

Sort Peptides By

Residue Number  Increasing Mass  Decreasing Mass

| Start - End | Observed | Mr(expt)  | Mr(calc)  | Delta  | Miss | Sequence                                                                 |
|-------------|----------|-----------|-----------|--------|------|--------------------------------------------------------------------------|
| 43 - 55     | 644.4307 | 1286.8468 | 1286.7194 | 0.1274 | 0    | <b>R.IQLGQGS</b> AVSVTK.N ( <a href="#">Ions score 49</a> )              |
| 134 - 145   | 687.4158 | 1372.8171 | 1372.6769 | 0.1402 | 0    | <b>R.MQADNTLPLAQR</b> .R Oxidation (M) ( <a href="#">Ions score 73</a> ) |

# gi|11119229 2-Cys peroxiredoxin

## Protein View

Match to: gi|11119229 Score: 210

2-Cys peroxiredoxin [Brassica napus]

Found in search of D:\Sixue Chen-don't delete please\20091115MMZ\DEC01\2405.wiff

Nominal mass ( $M_r$ ): 29708; Calculated pI value: 5.81

NCBI BLAST search of [gi|11119229](#) against nr

Unformatted [sequence string](#) for pasting into other applications

Taxonomy: [Brassica napus](#)

Fixed modifications: Carbamidomethyl (C)

Variable modifications: Deamidated (NQ), Gln->pyro-Glu (N-term Q), Oxidation (M)

Cleavage by Trypsin: cuts C-term side of KR unless next residue is P

Sequence Coverage: 21%

Matched peptides shown in **Bold Red**

```
1 MASLASTTTL ISSSSVLLPS KPSPFSPAAS FLRTLPTSTV STSSSLRSCF
51 SSISPLTCIR SSSRPSFAVK AQADDLPLVG NKAPDFEAEA VFDQEFIKVK
101 LSEYIGKKYV ILFLYPLDFT FVCPTAITAF SDRYEEFEKL NTEVLGVSVD
151 SVFSHLAWVQ TERKSGGLGD LNYPLVSDIT KSISKSPGVL IPDQGIALRG
201 LFIIDKKGVI QHSTINNLGI GRSVDETMRT LQALQYVQEN PDEVCPAGWK
251 PGEKSMKPPD KLSKEYFSAI
```

Show predicted peptides also

Sort Peptides By

Residue Number  Increasing Mass  Decreasing Mass

| Start - End | Observed | Mr(expt)  | Mr(calc)  | Delta  | Miss | Sequence                                                                      |
|-------------|----------|-----------|-----------|--------|------|-------------------------------------------------------------------------------|
| 71 - 82     | 620.9309 | 1239.8472 | 1239.6459 | 0.2013 | 0    | <b>K.AQADDLPLVGNK.A</b> ( <a href="#">Ions score 57</a> )                     |
| 165 - 181   | 875.0547 | 1748.0949 | 1747.8992 | 0.1957 | 0    | <b>K.SGGLGDLNYPLVSDITK.S</b> ( <a href="#">Ions score 71</a> )                |
| 186 - 199   | 743.5368 | 1485.0591 | 1484.8351 | 0.2240 | 0    | <b>K.SFGVLIPDQGIALR.G</b> ( <a href="#">Ions score 54</a> )                   |
| 207 - 222   | 854.4979 | 1706.9812 | 1706.9427 | 0.0384 | 1    | <b>K.KGVIQHSTINNLGIGR.S</b> Deamidated (NQ) ( <a href="#">Ions score 28</a> ) |

# gi|227247694 Unnamed protein product, containing cd03013 domain

## Protein View

Match to: gi|227247694 Score: 178

unnamed protein product [Brassica napus]

Found in search of D:\Sixue Chen-don't delete please\20091115MMZ\DEC01\2559.wiff

Nominal mass ( $M_r$ ): 21623; Calculated pI value: 8.97

NCBI BLAST search of [gi|227247694](#) against nr

Unformatted [sequence string](#) for pasting into other applications

Fixed modifications: Carbamidomethyl (C)

Variable modifications: Deamidated (NQ), Gln->pyro-Glu (N-term Q), Oxidation (M)

Cleavage by Trypsin: cuts C-term side of KR unless next residue is P

Sequence Coverage: 25%

Matched peptides shown in **Bold Red**

```
1 MAMSILKLRN SPALRSAASI ARIGVSSRAF SKLSEGTDIT SAAPGVSLQK
51 ARSWDEGVSS KFSTTPLSDI FKGKKVVIFG LPGAYTGVCV QQHVPSYKSH
101 MDKFKAKGID SVICVSVNDP YTLNGWAEKI GAKDAIEFYG DFDGKFHKSL
151 GLDKDLSAAL LGPRSERWSA YVEDGKVKAV NVEEAPSDFK VTGAEVILGQ
201 I
```

Show predicted peptides also

Sort Peptides By

Residue Number  Increasing Mass  Decreasing Mass

| Start - End | Observed | Mr(expt)  | Mr(calc)  | Delta  | Miss | Sequence                                                        |
|-------------|----------|-----------|-----------|--------|------|-----------------------------------------------------------------|
| 33 - 50     | 887.5647 | 1773.1148 | 1772.9156 | 0.1992 | 0    | <b>K.LSEGTDITSAAPGVSLQK.A</b> ( <a href="#">Ions score 31</a> ) |
| 62 - 72     | 628.4284 | 1254.8422 | 1254.6496 | 0.1926 | 0    | <b>K.FSTTPLSDIFK.G</b> ( <a href="#">Ions score 50</a> )        |
| 179 - 190   | 653.4255 | 1304.8365 | 1304.6248 | 0.2116 | 0    | <b>K.AVNVEEAPSDFK.V</b> ( <a href="#">Ions score 71</a> )       |
| 191 - 201   | 550.4185 | 1098.8224 | 1098.6285 | 0.1939 | 0    | <b>K.VTGAEVILGQI.-</b> ( <a href="#">Ions score 26</a> )        |

# gi|14764532 Monodehydroascorbate reductase

Match to: gi|14764532 Score: 410

monodehydroascorbate reductase [Brassica rapa subsp. pekinensis]

Found in search of C:\QStar Share Data\20091115MMZ\NOV17\1189NOV17.wiff

Nominal mass ( $M_r$ ): 46604; Calculated pI value: 5.81

NCBI BLAST search of [gi|14764532](#) against nr

Unformatted [sequence string](#) for pasting into other applications

Taxonomy: [Brassica rapa subsp. pekinensis](#)

Fixed modifications: Carbamidomethyl (C)

Variable modifications: Oxidation (M), Phospho (ST)

Cleavage by Trypsin: cuts C-term side of KR unless next residue is P

Sequence Coverage: 22%

Matched peptides shown in **Bold Red**

1 MAEKSFKYII LGGGVSAGYA **AKEFASQGVK** **PGELAVISKE** AVAPYERPAL  
51 **SKGYLFPPEGA** ARLPGFHCCV GSGGEKLLPE **SYKQKGIELI** LSTEIVKADL  
101 **AAKSLVSAAG** **DVFKYETLII** ATGSTVLRIT DFGVKGADSK NILYLR**EIDD**  
151 **ADKVVEAIQA** **KKGGKAVVVG** GGYIGLELSA ALRINNFVDV MVFPEPWCMP  
201 RLFTADIAAF YETYYTNKGV KIIKGTVASG FTAHPNGEVN EVQLKDGRL  
251 EADIVIVGVG ARPLTALFKG QVEEDKGGIK TDAFFKTSVP DVYAVGDVAT  
301 FPLKMYGDMR RVEHVDHSRK SAEQAVKAIK AAEGGGAVEE YDYLFFFYSR  
351 SFDLSWQFYG DNVGDSVLFV DSNPSNPKPR **FGAYWVQDGK** **VVGAFMEGGS**  
401 **GDENK**ALAKV AKARPAEESL EDLTKQGISF AAKI

Show predicted peptides also

Sort Peptides By

Residue Number  Increasing Mass  Decreasing Mass

| Start - End | Observed | Mr(expt)  | Mr(calc)  | Delta  | Miss | Sequence                                                                   |
|-------------|----------|-----------|-----------|--------|------|----------------------------------------------------------------------------|
| 23 - 39     | 587.3593 | 1759.0562 | 1758.9516 | 0.1046 | 0    | <b>K.EFASQGVKPGELAVISK.E</b> ( <a href="#">Ions score 51</a> )             |
| 40 - 52     | 477.6350 | 1429.8832 | 1429.7565 | 0.1267 | 0    | <b>K.EAVAPYERPALSK.G</b> ( <a href="#">Ions score 27</a> )                 |
| 53 - 62     | 540.8152 | 1079.6158 | 1079.5400 | 0.0758 | 0    | <b>K.GYLFPEGAAR.L</b> ( <a href="#">Ions score 51</a> )                    |
| 77 - 83     | 425.2817 | 848.5489  | 848.4643  | 0.0846 | 0    | <b>K.LLPESYK.Q</b> ( <a href="#">Ions score 37</a> )                       |
| 104 - 114   | 547.3333 | 1092.6520 | 1092.5815 | 0.0705 | 0    | <b>K.SLVSAAGDVFK.Y</b> ( <a href="#">Ions score 40</a> )                   |
| 147 - 161   | 548.6604 | 1642.9594 | 1642.8414 | 0.1181 | 1    | <b>R.EIDDADKVVEAIQAK.K</b> ( <a href="#">Ions score 56</a> )               |
| 381 - 390   | 585.8241 | 1169.6336 | 1169.5506 | 0.0831 | 0    | <b>R.FGAYWVQDGK.V</b> ( <a href="#">Ions score 64</a> )                    |
| 391 - 405   | 748.8657 | 1495.7168 | 1495.6613 | 0.0554 | 0    | <b>K.VVGAFMEGGSGDENK.A</b> ( <a href="#">Ions score 75</a> )               |
| 391 - 405   | 756.8638 | 1511.7131 | 1511.6562 | 0.0569 | 0    | <b>K.VVGAFMEGGSGDENK.A</b> Oxidation (M) ( <a href="#">Ions score 86</a> ) |

# gi|15227987 Low expression of osmotically responsive genes 1 (LOS2)

Match to: gi|15227987 Score: 344

LOS2 (Low expression of osmotically responsive genes 1); phosphopyruvate hydratase [Arabidopsis thaliana]

Found in search of C:\QStar Share Data\20091115MMZ\NOV15\1102NOV15.wiff

Nominal mass ( $M_r$ ): 47974; Calculated pI value: 5.54

NCBI BLAST search of [gi|15227987](#) against nr

Unformatted [sequence string](#) for pasting into other applications

Taxonomy: [Arabidopsis thaliana](#)

Fixed modifications: Carbamidomethyl (C)

Variable modifications: Oxidation (M), Phospho (ST)

Cleavage by Trypsin: cuts C-term side of KR unless next residue is P

Sequence Coverage: 19%

Matched peptides shown in **Bold Red**

```
1 MATITVVKAR QIFDSRGNPT VEVDIHTSNG IKVTAAVPSG ASTGIYEALE
51 LRDGGSDYLG KGVSKAVGNV NNIIGPALIG KDPTQQTALD NFMVHELDGT
101 QNEWGWCKQK LGANAILAVS LAVCKAGAVV SGIPLYKHIA NLAGNPKIVL
151 PVPAFNIVING GSHAGNKLAM QEFMILPVG A SFKEAMKMG VEVYHHLKSV
201 IKKKYGQDAT NVGDEGGFAP NIQENKEGLE LLKTAIEKAG YTGKVVIGMD
251 VAASEFYSED KTYDLNFKEE NNNGSQKISG DALKDLYKSF VAEYPIVSIE
301 DPFDQDDWEH YAKMTTECGT EVQIVGDDLL VTNPKRVAKA IAEKSCNALL
351 LKVNQIGSVT ESIEAVKMSK KAGWGVMTSH RSGETEDTFI ADLAVGLSTG
401 QIKTGAPCRS ERLAKYNQLL RIEEELGSEA IYAGVNFRRP VEPY
```

Show predicted peptides also

Sort Peptides By

Residue Number  Increasing Mass  Decreasing Mass

| Start - End | Observed | Mr(expt)  | Mr(calc)  | Delta  | Miss | Sequence                                                            |
|-------------|----------|-----------|-----------|--------|------|---------------------------------------------------------------------|
| 33 - 52     | 669.0596 | 2004.1568 | 2004.0528 | 0.1041 | 0    | <b>K.VTAAVPSGASTGIYEALELR.D</b> ( <a href="#">Ions score 117</a> )  |
| 66 - 81     | 517.3442 | 1549.0107 | 1548.8988 | 0.1119 | 0    | <b>K.AVGNVNNIIGPALIGK.D</b> ( <a href="#">Ions score 44</a> )       |
| 126 - 137   | 587.8679 | 1173.7213 | 1173.6758 | 0.0455 | 0    | <b>K.AGAVVSGIPLYK.H</b> ( <a href="#">Ions score 57</a> )           |
| 205 - 226   | 775.3848 | 2323.1327 | 2323.0353 | 0.0974 | 0    | <b>K.YGQDATNVGDEGGFAPNIQENK.E</b> ( <a href="#">Ions score 61</a> ) |
| 353 - 367   | 787.4640 | 1572.9135 | 1572.8359 | 0.0776 | 0    | <b>K.VNQIGSVTESIEAVK.M</b> ( <a href="#">Ions score 65</a> )        |

# gi|14248550 Plastid-lipid associated protein PAP2

## Protein View

Match to: gi|14248550 Score: 61

plastid-lipid associated protein PAP2 [Brassica rapa]

Found in search of D:\Sixue Chen-don't delete please\20091115MMZ\DEC01\2199DEC04.wiff

Nominal mass ( $M_r$ ): 34689; Calculated pI value: 4.79

NCBI BLAST search of [gi|14248550](#) against nr

Unformatted [sequence string](#) for pasting into other applications

Taxonomy: [Brassica rapa subsp. campestris](#)

Fixed modifications: Carbamidomethyl (C)

Variable modifications: Deamidated (NQ), Gln->pyro-Glu (N-term Q), Oxidation (M)

Cleavage by Trypsin: cuts C-term side of KR unless next residue is P

Sequence Coverage: 4%

Matched peptides shown in **Bold Red**

```
1 MATVHSFNQF PCKTRVQCPS NSKPLSKPPS SLVPMSALTR RPSFSPGEFA
51 VSRSDFRVRV IDAEDELDP E TSEGGGSALL MAEEAIESVE ETEVLKRSLV
101 DSLYGTD RGL SASSETRAEI GDLITQLESK NPTPAPTDAL FLLNGKWILA
151 YTSFVGLFPL LSRGIVPLVK VDEISQTIDS DNFTVENSVL FAGPLATTSI
201 STNAKFEIRS PKRVQIKFEE GVIGTPQLTD SIEIPEYVEF LGQKIDLTP I
251 RGLLTSVQDT ATSVARTISS QPPLKFS L PG DSAQSWLLTT YLDKDIRISR
301 GDGGSV FVLI KEGSPLLNP
```

Show predicted peptides also

Sort Peptides By

Residue Number  Increasing Mass  Decreasing Mass

| Start - End | Observed | Mr(expt)  | Mr(calc)  | Delta  | Miss | Sequence                                              |
|-------------|----------|-----------|-----------|--------|------|-------------------------------------------------------|
| 252 - 266   | 760.0848 | 1518.1551 | 1517.8049 | 0.3502 | 0    | R.GLLTSVQDTATSVAR.T ( <a href="#">Ions score 61</a> ) |

## Peptide View

MS/MS Fragmentation of **GLLTSVQDTATSVAR**

Found in **gi|14248550**, plastid-lipid associated protein PAP2 [Brassica rapa]

| #  | b                | b <sup>++</sup> | b <sup>*</sup> | b <sup>***</sup> | b <sup>0</sup>  | b <sup>0++</sup> | Seq.     | y                | y <sup>++</sup> | y <sup>*</sup>  | y <sup>***</sup> | y <sup>0</sup> | y <sup>0++</sup> | #  |
|----|------------------|-----------------|----------------|------------------|-----------------|------------------|----------|------------------|-----------------|-----------------|------------------|----------------|------------------|----|
| 1  | 58.0287          | 29.5180         |                |                  |                 |                  | <b>G</b> |                  |                 |                 |                  |                |                  | 15 |
| 2  | <b>171.1128</b>  | 86.0600         |                |                  |                 |                  | <b>L</b> | 1461.7908        | 731.3990        | 1444.7642       | 722.8857         | 1443.7802      | 722.3937         | 14 |
| 3  | <b>284.1969</b>  | 142.6021        |                |                  |                 |                  | <b>L</b> | 1348.7067        | 674.8570        | 1331.6801       | 666.3437         | 1330.6961      | 665.8517         | 13 |
| 4  | 385.2445         | 193.1259        |                |                  | 367.2340        | 184.1206         | <b>T</b> | 1235.6226        | 618.3149        | 1218.5961       | 609.8017         | 1217.6121      | 609.3097         | 12 |
| 5  | 472.2766         | 236.6419        |                |                  | 454.2660        | 227.6366         | <b>S</b> | <b>1134.5749</b> | 567.7911        | 1117.5484       | 559.2778         | 1116.5644      | 558.7858         | 11 |
| 6  | 571.3450         | 286.1761        |                |                  | 553.3344        | 277.1709         | <b>V</b> | <b>1047.5429</b> | 524.2751        | 1030.5164       | 515.7618         | 1029.5323      | 515.2698         | 10 |
| 7  | 699.4036         | 350.2054        | 682.3770       | 341.6921         | 681.3930        | 341.2001         | <b>Q</b> | <b>948.4745</b>  | 474.7409        | <b>931.4480</b> | 466.2276         | 930.4639       | 465.7356         | 9  |
| 8  | 814.4305         | 407.7189        | 797.4040       | 399.2056         | 796.4199        | 398.7136         | <b>D</b> | <b>820.4159</b>  | 410.7116        | 803.3894        | 402.1983         | 802.4054       | 401.7063         | 8  |
| 9  | 915.4782         | 458.2427        | 898.4516       | 449.7295         | 897.4676        | 449.2375         | <b>T</b> | <b>705.3890</b>  | 353.1981        | 688.3624        | <b>344.6849</b>  | 687.3784       | <b>344.1928</b>  | 7  |
| 10 | 986.5153         | 493.7613        | 969.4888       | 485.2480         | <b>968.5047</b> | 484.7560         | <b>A</b> | <b>604.3413</b>  | 302.6743        | 587.3148        | 294.1610         | 586.3307       | 293.6690         | 6  |
| 11 | <b>1087.5630</b> | 544.2851        | 1070.5364      | 535.7719         | 1069.5524       | 535.2798         | <b>T</b> | <b>533.3042</b>  | 267.1557        | 516.2776        | 258.6425         | 515.2936       | 258.1504         | 5  |
| 12 | 1174.5950        | 587.8011        | 1157.5685      | 579.2879         | 1156.5844       | 578.7959         | <b>S</b> | <b>432.2565</b>  | 216.6319        | 415.2300        | 208.1186         | 414.2459       | 207.6266         | 4  |
| 13 | 1273.6634        | 637.3354        | 1256.6369      | 628.8221         | 1255.6529       | 628.3301         | <b>V</b> | 345.2245         | 173.1159        | 328.1979        | 164.6026         |                |                  | 3  |
| 14 | 1344.7005        | 672.8539        | 1327.6740      | 664.3406         | 1326.6900       | 663.8486         | <b>A</b> | <b>246.1561</b>  | 123.5817        | 229.1295        | 115.0684         |                |                  | 2  |
| 15 |                  |                 |                |                  |                 |                  | <b>R</b> | <b>175.1190</b>  | 88.0631         | 158.0924        | 79.5498          |                |                  | 1  |

# gi|15241115 Early-responsive to dehydration 8 (HSP81-2)

Match to: gi|15241115 Score: 586

HSP81-2 (EARLY-RESPONSIVE TO DEHYDRATION 8); ATP binding [Arabidopsis thaliana]

Found in search of C:\QStar Share Data\20091115MMZ\NOV15\336NOV15.wiff

Nominal mass ( $M_r$ ): 80299; Calculated pI value: 4.95

NCBI BLAST search of [gi|15241115](#) against nr

Unformatted [sequence string](#) for pasting into other applications

Taxonomy: [Arabidopsis thaliana](#)

Fixed modifications: Carbamidomethyl (C)

Variable modifications: Oxidation (M), Phospho (ST)

Cleavage by Trypsin: cuts C-term side of KR unless next residue is P

Sequence Coverage: 15%

Matched peptides shown in **Bold Red**

```
1 MADAETFAFQ AEINQLLSLI INTFYSNKEI FLRELISNSS DALDKIRFES
51 LTDKSKLDGQ PELFIHIIPD KTNNTLTIID SGIGMTRKADL VNNLGTIARS
101 GKKEFMEALA AGADVSMIGQ FGVGFYSAYL VADKVVVITK HNDDEQYVWE
151 SQAGGSFTVT RDTSGETLGR GTKMVLYLKE DQLEYLEERR LKDLVKKHSE
201 FISYPISLWI EKTIEKEISD DEEEEEKKDE EGKVEEVDEE KEKEEKKKKK
251 IKEVSHEWDL VNKQKPIWMR KPPEINKEEY AAFYKSLSD WEEHLAVKHF
301 SVEGQLEFKA ILFVPKRAPF DLFDTKKKPN NIKLYVRRVF IMDNCEDIIP
351 EYLG FVKGIV DSEDPLNIS RETLQQNKIL KVIRKNLVKK CLELFFEIAE
401 NKEDYNKFEY AFSKNLKLG I HEDSQNRTKI AELLRYHSTK SGDELTS LKD
451 YVTRMKEGQN DIFYITGESK KAVENSPFLE KLKKKGIEVL YMVDAIDEYA
501 IGQLKEFEFG KLVSATKEGL KLDETEDEKK KKEELKEKFE GLCKVIKDV L
551 GDKVEKVIVS DRVVDSPCCL VTGEYGTAN MERIMKAQAL RDSSMAGYMS
601 SKKTMEINPE NSIMDELRR ADADKNDKSV KDLVLLLFET ALLTSGFSLD
651 EPNTFGSRIH RMLKLGSLD DDDAVEADAE MPPLEDDADA EGSKMEEVD
```

Show predicted peptides also

Sort Peptides By

Residue Number

Increasing Mass

Decreasing Mass

| Start - End | Observed | Mr (expt) | Mr (calc) | Delta  | Miss | Sequence                                              |
|-------------|----------|-----------|-----------|--------|------|-------------------------------------------------------|
| 57 - 71     | 579.0155 | 1734.0248 | 1733.9352 | 0.0896 | 0    | K.LDGQPELFIHIIPDK.T ( <a href="#">Ions score 43</a> ) |
| 88 - 99     | 628.8761 | 1255.7376 | 1255.6884 | 0.0492 | 0    | K.ADLVNNLGTIAR.S ( <a href="#">Ions score 77</a> )    |
| 180 - 189   | 662.3218 | 1322.6291 | 1322.5990 | 0.0302 | 0    | K.EDQLEYLEER.R ( <a href="#">Ions score 74</a> )      |
| 278 - 285   | 510.7756 | 1019.5367 | 1019.4600 | 0.0767 | 0    | K.EEYAAFYK.S ( <a href="#">Ions score 37</a> )        |
| 318 - 326   | 527.3013 | 1052.5881 | 1052.5179 | 0.0702 | 0    | R.APFDLFDTK.K ( <a href="#">Ions score 50</a> )       |
| 358 - 371   | 764.4354 | 1526.8563 | 1526.7940 | 0.0623 | 0    | K.GIVDSEDPLNISR.E ( <a href="#">Ions score 85</a> )   |
| 408 - 414   | 446.2563 | 890.4981  | 890.4174  | 0.0807 | 0    | K.FYEAFSK.N ( <a href="#">Ions score 33</a> )         |
| 441 - 449   | 475.2867 | 948.5589  | 948.4764  | 0.0825 | 0    | K.SGDELTS LK.D ( <a href="#">Ions score 74</a> )      |
| 457 - 470   | 800.9120 | 1599.8094 | 1599.7417 | 0.0677 | 0    | K.EGQNDIFYITGESK.K ( <a href="#">Ions score 59</a> )  |
| 472 - 481   | 567.3239 | 1132.6333 | 1132.5764 | 0.0569 | 0    | K.AVENSPFLEK.L ( <a href="#">Ions score 59</a> )      |



# gi|2655420 Heat shock cognate protein HSC70

## Protein View

Match to: gi|2655420 Score: 459

heat shock cognate protein HSC70 [Brassica napus]

Found in search of C:\QStar Share Data\20091115MMZ\NOV17\379NOV17.wiff

Nominal mass ( $M_r$ ): 71129; Calculated pI value: 5.08

NCBI BLAST search of [gi|2655420](#) against nr

Unformatted [sequence string](#) for pasting into other applications

Taxonomy: [Brassica napus](#)

Fixed modifications: Carbamidomethyl (C)

Variable modifications: Oxidation (M), Phospho (ST)

Cleavage by Trypsin: cuts C-term side of KR unless next residue is P

Sequence Coverage: 18%

Matched peptides shown in **Bold Red**

```
1  MSGKGEGPAI  GIDLGTTYSC  VGVWQHDRVE  I IANDQGNRT  TPSYVAFTDS
51  ERLIGDAAKN  QVAMNPINTV  FDAKRLIGRR  FSDSSVQSDM  KLWPFKIIAG
101 PAEKPMIVVN  YKGEEKQFAA  EEISSMVLIK  MREIAEAYLG  VTIKNAVVTV
151 PAYFNDSQRQ  ATKDAGVIAG  LNVMRIINEP  TAAAIAYGLD  KKATSVGEKN
201 VLIFDLGGGT  FDVSLLTIEE  GIFEVKATAG  DTHLGGEDFD  NRMVNHFVQE
251 FKRKSKKDIT  GNPRALRRLR  TACERAKRTL  SSTAQTIEI  DSLFEGIDFY
301 SALTRARFEE  LNMDLFRKCM  EPVEKCLRDA  KMDKSTVHDV  VLVGSTRIPK
351 VQQLLQDFFN  GKELCKSINP  DEAVAYGAAV  QGAILSGEGN  EKVQDLLLLD
401 VTPLSLGLET  AGGVMTTLIA  RNTTIPTKKE  QVFSTYSDNQ  PGVLIQVFEG
451 ERARTKDNNL  LGKFELSGIP  PAPRGVPQIT  VCFDIDANGI  LNVSAEDKTT
501 GQKNKITITT  DKGRLSKDDI  EKMVQEAKEY  KSEDEEHKKK  VEAKNALENY
551 AYNMRNTIQD  EKIGEKLPAA  DKKKIEDAIE  QAIQWLENNQ  LGEADEFEDK
601 MKELESICNP  IIAKMYQGAG  GEAAGMDDDA  PPASGGAGPK  IEEVD
```

| Start - End | Observed | Mr(expt)  | Mr(calc)  | Delta  | Miss | Sequence                                                                         |
|-------------|----------|-----------|-----------|--------|------|----------------------------------------------------------------------------------|
| 40 - 52     | 737.3662 | 1472.7178 | 1472.6783 | 0.0395 | 0    | R.TTPSYVAFTDSER.L ( <a href="#">Ions score 82</a> )                              |
| 60 - 74     | 831.4414 | 1660.8682 | 1660.8243 | 0.0439 | 0    | K.NQVAMNPINTVFDK.R ( <a href="#">Ions score 39</a> )                             |
| 81 - 91     | 615.8024 | 1229.5903 | 1229.5234 | 0.0669 | 0    | R.FSDSSVQSDMK.L ( <a href="#">Ions score 39</a> )                                |
| 145 - 159   | 560.9835 | 1679.9286 | 1679.8267 | 0.1019 | 0    | K.NAVVTVPAYFNDSQR.Q ( <a href="#">Ions score 49</a> )                            |
| 164 - 175   | 608.3919 | 1214.7692 | 1214.6441 | 0.1250 | 0    | K.DAGVIAGLNVMR.I ( <a href="#">Ions score 57</a> )                               |
| 164 - 175   | 616.3564 | 1230.6983 | 1230.6391 | 0.0593 | 0    | K.DAGVIAGLNVMR.I Oxidation (M) ( <a href="#">Ions score 49</a> )                 |
| 227 - 242   | 559.2825 | 1674.8258 | 1674.7234 | 0.1024 | 0    | K.ATAGDTHLGGEDFDNR.M ( <a href="#">Ions score 56</a> )                           |
| 308 - 317   | 665.3352 | 1328.6559 | 1328.6071 | 0.0488 | 0    | R.FEELNMDLFR.K Oxidation (M) ( <a href="#">Ions score 72</a> )                   |
| 615 - 640   | 804.0228 | 2409.0464 | 2408.9849 | 0.0615 | 0    | K.MYQGAGGEAAGMDDDAPPASGGAGPK.I 2 Oxidation (M) ( <a href="#">Ions score 69</a> ) |

# gi|1755154 Germin-like protein

## Protein View

Match to: gi|1755154 Score: 79  
germin-like protein [Arabidopsis thaliana]  
Found in search of D:\Sixue Chen-don't delete please\20091115MMZ\DEC01\2274DEC04.wiff

Nominal mass ( $M_r$ ): 22020; Calculated pI value: 6.81  
NCBI BLAST search of [gi|1755154](#) against nr  
Unformatted [sequence string](#) for pasting into other applications

Taxonomy: [Arabidopsis thaliana](#)

Fixed modifications: Carbamidomethyl (C)  
Variable modifications: Deamidated (NQ), Gln->pyro-Glu (N-term Q), Oxidation (M)  
Cleavage by Trypsin: cuts C-term side of KR unless next residue is P  
Sequence Coverage: 17%

Matched peptides shown in **Bold Red**

```
1 MKMIIQIFFI ISLISTISFA SVQDFCVADP KGPQSPSGYS CKNPDQVTEN  
51 DFAFTGLGKA GNTSNIKAA VTPAFAPAYA GINGLGVSLA RLDLAGGGVI  
101 PLHTHPGASE VLVVIQGTIC AGFISSANKV YLKTILNRGDS MVFPQGLLHF  
151 QLNSGKGPAL AFVAFGSSSP GLQILPFALF ANDLPSELVE ATTFLSDAEV  
201 KKLKGVGGT N
```

Show predicted peptides also

Sort Peptides By

Residue Number  Increasing Mass  Decreasing Mass

| Start - End | Observed | Mr(expt)  | Mr(calc)  | Delta   | Miss | Sequence                       |                                                                  |
|-------------|----------|-----------|-----------|---------|------|--------------------------------|------------------------------------------------------------------|
| 43 - 59     | 618.4750 | 1852.4032 | 1852.8479 | -0.4447 | 0    | <b>K.NPDQVTENDFAFTGLGK.A</b>   | Deamidated (NQ) ( <a href="#">Ions score 32</a> )                |
| 43 - 59     | 927.6111 | 1853.2077 | 1852.8479 | 0.3597  | 0    | <b>K.NPDQVTENDFAFTGLGK.A</b>   | Deamidated (NQ) ( <a href="#">Ions score 34</a> )                |
| 138 - 156   | 697.8482 | 2090.5227 | 2091.0095 | -0.4868 | 0    | <b>R.GDSMVFPQGLLHFQLNSGK.G</b> | Deamidated (NQ); Oxidation (M) ( <a href="#">Ions score 46</a> ) |

# gi|24421231 Ascorbate peroxidase

## Protein View

Match to: gi|24421231 Score: 142

ascorbate peroxidase [Brassica juncea]

Found in search of D:\Sixue Chen-don't delete please\20091115MMZ\DEC01\2119.wiff

Nominal mass ( $M_r$ ): 27726; Calculated pI value: 5.73

NCBI BLAST search of [gi|24421231](#) against nr

Unformatted [sequence string](#) for pasting into other applications

Taxonomy: [Brassica juncea](#)

Fixed modifications: Carbamidomethyl (C)

Variable modifications: Deamidated (NQ), Gln->pyro-Glu (N-term Q), Oxidation (M)

Cleavage by Trypsin: cuts C-term side of KR unless next residue is P

Sequence Coverage: 20%

Matched peptides shown in **Bold Red**

```
1 MTKSYPTVSE DYQKAIEKCK RKLRLIAEK NCAPIMVRLA WHSAGTFDCA
51 SKTGGPFGTM RFDAEQGHGA NSGIHIALRL LDPIREQFPA ISFADFHQLA
101 GVVAVEVTGG PEIPFHPGRE DKPQPPPEGR LPDATKGCDH LRQVFTKQMG
151 LSDKDIVALS GAHTLGRCHK DRSGFEGAWT SNPLIFDNSY FKELLTGEKE
201 GLLQLVSDKA LLDDPVFRPL VEKYAADEEA FFADYAEAHL KLSELGFADA
251
```

Show predicted peptides also

Sort Peptides By

Residue Number  Increasing Mass  Decreasing Mass

| Start - End | Observed | Mr (expt) | Mr (calc) | Delta  | Miss | Sequence                                                             |
|-------------|----------|-----------|-----------|--------|------|----------------------------------------------------------------------|
| 4 - 14      | 658.9142 | 1315.8139 | 1315.5932 | 0.2207 | 0    | <b>K.SYPTVSE<del>D</del>YQK.A</b> ( <a href="#">Ions score 19</a> )  |
| 53 - 61     | 470.3170 | 938.6195  | 938.4280  | 0.1915 | 0    | <b>K.TGGPFGTMR.F</b> Oxidation (M) ( <a href="#">Ions score 55</a> ) |
| 210 - 223   | 538.0780 | 1611.2122 | 1610.9032 | 0.3090 | 0    | <b>K.ALLDDPVFRPLVEK.Y</b> ( <a href="#">Ions score 50</a> )          |
| 224 - 241   | 687.7787 | 2060.3142 | 2059.9163 | 0.3980 | 0    | <b>K.YAADEEAFFADYAEAHLK.L</b> ( <a href="#">Ions score 18</a> )      |

# gi|169244541 Putative manganese superoxide dismutase 1

## Protein View

Match to: gi|169244541 Score: 83

putative manganese superoxide dismutase 1 [Brassica napus]

Found in search of D:\Sixue Chen-don't delete please\20091115MMZ\DEC01\2384.wiff

Nominal mass ( $M_r$ ): 25499; Calculated pI value: 8.47

NCBI BLAST search of [gi|169244541](#) against nr

Unformatted [sequence string](#) for pasting into other applications

Taxonomy: [Brassica napus](#)

Fixed modifications: Carbamidomethyl (C)

Variable modifications: Deamidated (NQ), Gln->pyro-Glu (N-term Q), Oxidation (M)

Cleavage by Trypsin: cuts C-term side of KR unless next residue is P

Sequence Coverage: 15%

Matched peptides shown in **Bold Red**

```
1 MAIRSLASRR TLAGLKETSS RLLGLRSIQT FTLPDLPYDY SALEPAISGE
51 IMQIHQKHH QAYVTNYNNA LEQLDQAVNK GDASTVVKLQ SAIKFNGGGH
101 VNHSIFWKNL APVKEGGGEP PKGALGGAID THFGSLEGLV KKMSAEGAAL
151 QGSGVWVWGL DKELKTLVVD TTANQDPLVT KGGSLVPLVG IDVWEHAYYL
201 QYKNVRPEYL KNVVKVINWK YASEVYEKEC K
```

Show predicted peptides also

Sort Peptides By

Residue Number  Increasing Mass  Decreasing Mass

| Start - End | Observed | Mr (expt) | Mr (calc) | Delta  | Miss | Sequence                                                              |
|-------------|----------|-----------|-----------|--------|------|-----------------------------------------------------------------------|
| 123 - 141   | 614.7727 | 1841.2962 | 1840.9683 | 0.3278 | 0    | <b>K.GALGGAID<b>THFGSLEGLV</b>K</b> ( <a href="#">Ions score 40</a> ) |
| 166 - 181   | 858.0770 | 1714.1395 | 1713.9149 | 0.2246 | 0    | <b>K.TLVVD<b>TTANQDPLV</b>T</b> .G ( <a href="#">Ions score 43</a> )  |

# gi|15224810 Late embryogenesis abundant (LEA) family protein

## Protein View

Match to: gi|15224810 Score: 72

late embryogenesis abundant family protein / LEA family protein [Arabidopsis thaliana]

Found in search of C:\QStar Share Data\20091115MM2\NOV17\1573NOV17.wiff

Nominal mass (M<sub>r</sub>): 36185; Calculated pI value: 4.69

NCBI BLAST search of [gi|15224810](#) against nr

Unformatted [sequence string](#) for pasting into other applications

Taxonomy: [Arabidopsis thaliana](#)

Links to retrieve other entries containing this sequence from NCBI Entrez:

[gi|30689599](#) from [Arabidopsis thaliana](#)

[gi|3212877](#) from [Arabidopsis thaliana](#)

[gi|89000943](#) from [Arabidopsis thaliana](#)

Fixed modifications: Carbamidomethyl (C)

Variable modifications: Oxidation (M), Phospho (ST)

Cleavage by Trypsin: cuts C-term side of KR unless next residue is P

Sequence Coverage: 6%

Matched peptides shown in **Bold Red**

```
1 MSTSEDKPEI ISRVVHQEGD VEIVDRSQKD KDEEKEEGKG GFLDKVKDFI
51 HDIGEKLEGT IGFGKPTADV SAIHIPKINL ERADIVVDVL VKNPNPVPPI
101 LIDVNYLVES DGRKLVSGLI PDAGTLKAHG EETVKIPLTL IYDDIKSTYN
151 DINPGMIIPY RIKVDLIVDV PVLGRLTLPL EKCGEIPK KPDVDIEKIK
201 FQKFSLEETV AILHVRLQNM NDFDLGLNDL DCEVWLCDVS IGKAEIADSI
251 KLDKNGSGLI NVPMTFRPKD FGSALWDMIR GKGTGYTIKG NIDVDTPFGA
301 MKLPIIKEGG ETRLKEDDD DDDE
```

Show predicted peptides also

Sort Peptides By

Residue Number  Increasing Mass  Decreasing Mass

| Start - End | Observed | Mr (expt) | Mr (calc) | Delta  | Miss | Sequence                                                   |
|-------------|----------|-----------|-----------|--------|------|------------------------------------------------------------|
| 115 - 127   | 642.4378 | 1282.8610 | 1282.7496 | 0.1113 | 0    | <b>K.LVSGLIPDAGTLK.A</b> ( <a href="#">Ions score 34</a> ) |
| 176 - 182   | 407.3127 | 812.6109  | 812.5007  | 0.1101 | 0    | <b>R.LTLPLEK.C</b> ( <a href="#">Ions score 37</a> )       |

# gi|9082317 Actin

## Protein View

Match to: gi|9082317 Score: 547

actin [*Helianthus annuus*]

Found in search of C:\QStar Share Data\20091115MMZ\NOV26\1297NOV26.wiff

Nominal mass ( $M_r$ ): 41934; Calculated pI value: 5.64

NCBI BLAST search of [gi|9082317](#) against nr

Unformatted [sequence string](#) for pasting into other applications

Taxonomy: [Helianthus annuus](#)

Fixed modifications: Carbamidomethyl (C)

Variable modifications: Deamidated (NQ),Gln->pyro-Glu (N-term Q),Oxidation (M)

Cleavage by Trypsin: cuts C-term side of KR unless next residue is P

Sequence Coverage: 27%

Matched peptides shown in **Bold Red**

1 MAHEGEIQPL VCDNGTGMVK **AGFAGDDAPR** AVFPSIVGRP RHTGVMVGMG  
51 QKDAYVGDEA QSKRGILTLK **YPIEHGIVSN WDDMEKIWHH** TFYNELRVAP  
101 **EEHPVLLTEA PLNPKANREK** MTQIMFETFN VPAMYVAIQA VLSLYASGRT  
151 TGIVLDSGDG VSHTVPIYKG YALPHAILRL DLAGRDLTDS **LMKILTERGY**  
201 **MFTTTAEREI** VRDMKEKRAY VALDYEQELE TAKSSSSVEK **NYELPDGQVI**  
251 **TIGAERFRCP** EVLFQPSLIG MEAAGIHETT YNSIMKCDVD IRKDLYGNIV  
301 LSGGSTMFPG IADRMSKEIT **ALAPSSMKIK** VVAPPERKYS VWIGGSILAS  
351 LSTFQQMWIS **KGEYDESGPS IVHRKCF**

| Start - End | Observed | Mr(expt)  | Mr(calc)  | Delta  | Miss | Sequence                                                             |
|-------------|----------|-----------|-----------|--------|------|----------------------------------------------------------------------|
| 21 - 30     | 488.8018 | 975.5890  | 975.4410  | 0.1480 | 0    | K.AGFAGDDAPR.A ( <a href="#">Ions score 71</a> )                     |
| 21 - 30     | 488.8018 | 975.5890  | 975.4410  | 0.1480 | 0    | K.AGFAGDDAPR.A ( <a href="#">Ions score 63</a> )                     |
| 71 - 86     | 645.0428 | 1932.1064 | 1931.8723 | 0.2341 | 0    | K.YPIEHGIVSNWDDMEK.I ( <a href="#">Ions score 59</a> )               |
| 71 - 86     | 650.3824 | 1948.1253 | 1947.8673 | 0.2580 | 0    | K.YPIEHGIVSNWDDMEK.I Oxidation (M) ( <a href="#">Ions score 46</a> ) |
| 98 - 115    | 652.1025 | 1953.2857 | 1953.0571 | 0.2286 | 0    | R.VAPEEHPVLLTEAPLNPK.A ( <a href="#">Ions score 62</a> )             |
| 186 - 193   | 461.7980 | 921.5815  | 921.4477  | 0.1338 | 0    | R.DLTDSLMLK.I ( <a href="#">Ions score 42</a> )                      |
| 186 - 193   | 469.8041 | 937.5936  | 937.4426  | 0.1510 | 0    | R.DLTDSLMLK.I Oxidation (M) ( <a href="#">Ions score 20</a> )        |
| 199 - 208   | 588.8424 | 1175.6703 | 1175.5281 | 0.1422 | 0    | R.GYMFTTTAER.E ( <a href="#">Ions score 49</a> )                     |
| 199 - 208   | 596.8529 | 1191.6912 | 1191.5230 | 0.1682 | 0    | R.GYMFTTTAER.E Oxidation (M) ( <a href="#">Ions score 60</a> )       |
| 241 - 256   | 888.0302 | 1774.0459 | 1773.8897 | 0.1561 | 0    | K.NYELPDGQVITIGAER.F ( <a href="#">Ions score 96</a> )               |
| 318 - 328   | 574.3738 | 1146.7330 | 1146.5954 | 0.1376 | 0    | K.EITALAPSSMK.I ( <a href="#">Ions score 60</a> )                    |
| 318 - 328   | 582.3717 | 1162.7289 | 1162.5903 | 0.1386 | 0    | K.EITALAPSSMK.I Oxidation (M) ( <a href="#">Ions score 41</a> )      |
| 362 - 374   | 723.4081 | 1444.8016 | 1444.6583 | 0.1433 | 0    | K.GEYDESGPSIVHR.K ( <a href="#">Ions score 97</a> )                  |
| 362 - 374   | 482.6431 | 1444.9075 | 1444.6583 | 0.2492 | 0    | K.GEYDESGPSIVHR.K ( <a href="#">Ions score 71</a> )                  |

# gi|15241472 TUB4 (tubulin beta-4 chain)

Match to: gi|15241472 Score: 427

TUB4 (tubulin beta-4 chain) [Arabidopsis thaliana]

Found in search of C:\QStar Share Data\20091115MMZ\NOV17\916NOV17.wiff

Nominal mass ( $M_r$ ): 50361; Calculated pI value: 4.76

NCBI BLAST search of [gi|15241472](#) against nr

Unformatted [sequence string](#) for pasting into other applications

Taxonomy: [Arabidopsis thaliana](#)

Fixed modifications: Carbamidomethyl (C)

Variable modifications: Oxidation (M), Phospho (ST)

Cleavage by Trypsin: cuts C-term side of KR unless next residue is P

Sequence Coverage: 24%

Matched peptides shown in **Bold Red**

```
1 MREILHIQGG QCGNQIGAKF WEVICDEHGI DHTGQYVGDS PLQLERIDVY
51 FNEASGGKYV PRAVLMDLEP GTMDSLRSGP FGQIFRPDNF VFGQSGAGNN
101 WAKGHYTEGA ELIDSVLDV V RKEAENS DCL QGFQVCHSLG GGTGSGMGTL
151 LISKIREEYP DRMMTFVSF PSPKVS DTVV EPYNATLSVH QLVENADECM
201 VLDNEALYDI CFRTLKANP TFGDLNHLIS ATMSGVTCCL RFPGQLNSDL
251 RKLAVNLIPF PRLHFMVGF APLTSRGSQQ YSALSVP ELT QQMWDAKNMM
301 CAADPRHGRY LTASAVFRGK LSTKEVDEQM MNIQNKNSSY FVEWIPNNVK
351 SSVCDIAPKG LKMASTFIGN STSIQEMFRR VSEQFTAMFR RKAFLHWYTG
401 EGMDEMEFTE AESNMNDLVA EYQQYQDATA GEEYEYEEEE EYET
```

Show predicted peptides also

Sort Peptides By

Residue Number  Increasing Mass  Decreasing Mass

| Start - End | Observed | Mr(expt)  | Mr(calc)  | Delta  | Miss | Sequence                                                                |
|-------------|----------|-----------|-----------|--------|------|-------------------------------------------------------------------------|
| 47 - 58     | 650.3596 | 1298.7046 | 1298.6143 | 0.0904 | 0    | R.IDVYFNEASGGK.Y ( <a href="#">Ions score 80</a> )                      |
| 63 - 77     | 824.4539 | 1646.8933 | 1646.8008 | 0.0925 | 0    | R.AVLMDLEPGTMDSLR.S ( <a href="#">Ions score 56</a> )                   |
| 63 - 77     | 832.4457 | 1662.8768 | 1662.7957 | 0.0811 | 0    | R.AVLMDLEPGTMDSLR.S Oxidation (M) ( <a href="#">Ions score 36</a> )     |
| 63 - 77     | 560.6558 | 1678.9455 | 1678.7906 | 0.1549 | 0    | R.AVLMDLEPGTMDSLR.S 2 Oxidation (M) ( <a href="#">Ions score 43</a> )   |
| 242 - 251   | 573.8497 | 1145.6848 | 1145.5829 | 0.1019 | 0    | R.FPGQLNSDLR.K ( <a href="#">Ions score 58</a> )                        |
| 253 - 262   | 570.4009 | 1138.7872 | 1138.6862 | 0.1010 | 0    | K.LAVNLIPFPR.L ( <a href="#">Ions score 39</a> )                        |
| 310 - 318   | 514.3330 | 1026.6515 | 1026.5498 | 0.1016 | 0    | R.YLTASAVFR.G ( <a href="#">Ions score 42</a> )                         |
| 325 - 336   | 498.9403 | 1493.7990 | 1493.6490 | 0.1500 | 0    | K.EVDEQMNIQNK.N Oxidation (M) ( <a href="#">Ions score 26</a> )         |
| 337 - 350   | 848.9741 | 1695.9336 | 1695.8257 | 0.1079 | 0    | K.NSSYFVEWIPNNVK.S ( <a href="#">Ions score 27</a> )                    |
| 363 - 379   | 651.3504 | 1951.0293 | 1950.8815 | 0.1478 | 0    | K.MASTFIGNSTSIQEMFR.R 2 Oxidation (M) ( <a href="#">Ions score 42</a> ) |
| 381 - 390   | 616.3454 | 1230.6762 | 1230.5703 | 0.1059 | 0    | R.VSEQFTAMFR.R Oxidation (M) ( <a href="#">Ions score 58</a> )          |



# gi|34733239 Putative tubulin alpha-2/alpha-4 chain

## Protein View

Match to: gi|34733239 Score: 250

putative tubulin alpha-2/alpha-4 chain [Brassica napus]

Found in search of C:\QStar Share Data\20091115MMZ\NOV17\897NOV17.wiff

Nominal mass ( $M_r$ ): 50089; Calculated pI value: 4.91

NCBI BLAST search of [gi|34733239](#) against nr

Unformatted [sequence string](#) for pasting into other applications

Taxonomy: [Brassica napus](#)

Fixed modifications: Carbamidomethyl (C)

Variable modifications: Oxidation (M), Phospho (ST)

Cleavage by Trypsin: cuts C-term side of KR unless next residue is P

Sequence Coverage: 14%

Matched peptides shown in **Bold Red**

```
1 MGECSIHMG QAGIQVGNAC WELYCLEHGI QPDGQMPGDK TVGGGDDAFN
51 TFPSETGAGK HVPRAVFDL EPTVIDEVRT GTYRQLFHPE QLISGKEDAA
101 NNFARGHYTI GKEIVDLCLD RIRKLADNCT GLQGFLVFNA VGGGTGSGLG
151 SLLLERLSVD YGKSKLGFY VYSPQVSTS VVEPYNSVLS THSLEHTDV
201 SILLDNEAIY DICRRSLNIE RPTYTNLNR VSQVISSLTA SLRFDGALNV
251 DVTEFQTNLV PYPRIHFMLS SYAPVISA EK AFHEQLSVAE ITNSAFEPAS
301 MMAKCDPRHG KYMACCLMYR GDVVPKDVNA AVGTIKTKRT IQFVDWCPTG
351 FKCGINYQPP TVVPGGDLAK VQRAVCMISN STSVAEVFPR IDHKFDLMYA
401 KRAFVHWYVG EGMEEGEFSE AREDLAALK DYEEVGAEGG DDVDDEGEY
451
```

Show predicted peptides also

Sort Peptides By

Residue Number  Increasing Mass  Decreasing Mass

| Start - End | Observed | Mr(expt)  | Mr(calc)  | Delta  | Miss | Sequence                                                          |
|-------------|----------|-----------|-----------|--------|------|-------------------------------------------------------------------|
| 41 - 60     | 660.0147 | 1977.0223 | 1976.8752 | 0.1471 | 0    | <b>K.TVGGGDDAFNTFFSETGAGK.H</b> ( <a href="#">Ions score 64</a> ) |
| 65 - 79     | 851.4992 | 1700.9839 | 1700.8985 | 0.0854 | 0    | <b>R.AVFVDLEPTVIDEVR.T</b> ( <a href="#">Ions score 71</a> )      |
| 216 - 229   | 564.3507 | 1690.0303 | 1689.8798 | 0.1505 | 0    | <b>R.SLNIERPTYTNLNR.L</b> ( <a href="#">Ions score 23</a> )       |
| 327 - 336   | 494.3343 | 986.6541  | 986.5397  | 0.1144 | 0    | <b>K.DVNAAVGTIK.T</b> ( <a href="#">Ions score 42</a> )           |
| 423 - 430   | 444.7865 | 887.5584  | 887.4600  | 0.0984 | 0    | <b>R.EDLAALK.D</b> ( <a href="#">Ions score 51</a> )              |

# gi|408232 Proliferating cell nuclear antigen

## Protein View

Match to: gi|408232 Score: 226

PCNA [Brassica napus]

Found in search of D:\Sixue Chen-don't delete please\20091115MMZ\DEC01\1856DEC04.wiff

Nominal mass ( $M_r$ ): 29375; Calculated pI value: 4.61

NCBI BLAST search of [gi|408232](#) against nr

Unformatted [sequence string](#) for pasting into other applications

Taxonomy: [Brassica napus](#)

Fixed modifications: Carbamidomethyl (C)

Variable modifications: Deamidated (NQ),Gln->pyro-Glu (N-term Q),Oxidation (M)

Cleavage by Trypsin: cuts C-term side of KR unless next residue is P

Sequence Coverage: 29%

Matched peptides shown in **Bold Red**

```
1 MLELRLVQGS LLKKVLESIK DLVNDANFDC STTGFSLQAM DSSHVALVSL
51 LLRSEGFHEY RCDRNLSMGMLNLGNMSKMLK CAGNDDIITI KADDGGDTVT
101 FMFESPKQDK IADFEMKLMD IDSEHLGIPD AEYHSIVRMP SNEFSRICKD
151 LSTIGDTVVI SVTKREGVKFS TAGDIGTANI VLRQNTTVDK PEDAIVIMN
201 EPVSLSFALR YMNSFTKATP LSDTVTISLS SELPVVVEYK VAEMGYIRYY
251 LAPKIEEDEE DKA
```

Show predicted peptides also

Sort Peptides By

Residue Number  Increasing Mass  Decreasing Mass

| Start - End | Observed | Mr(expt)  | Mr(calc)  | Delta  | Miss | Sequence                                                                    |
|-------------|----------|-----------|-----------|--------|------|-----------------------------------------------------------------------------|
| 92 - 107    | 866.9919 | 1731.9693 | 1731.7298 | 0.2395 | 0    | <b>K.ADDGGDTVTFMFESPK.Q</b> Oxidation (M) ( <a href="#">Ions score 36</a> ) |
| 150 - 164   | 774.5522 | 1547.0899 | 1546.8454 | 0.2445 | 0    | <b>K.DLSTIGDTVVISVTK.E</b> ( <a href="#">Ions score 58</a> )                |
| 169 - 183   | 768.0436 | 1534.0726 | 1533.8151 | 0.2575 | 0    | <b>K.FSTAGDIGTANIVLR.Q</b> ( <a href="#">Ions score 68</a> )                |
| 218 - 240   | 816.8961 | 2447.6666 | 2447.3047 | 0.3619 | 0    | <b>K.ATPLSDTVTISLSSELPVVVEYK.V</b> ( <a href="#">Ions score 23</a> )        |
| 255 - 263   | 539.3420 | 1076.6695 | 1076.4509 | 0.2186 | 1    | <b>K.IEDEEDKA.-</b> ( <a href="#">Ions score 41</a> )                       |

# gi|15238284 CBS domain-containing protein

## Protein View

Match to: gi|15238284 Score: 205

CBS domain-containing protein [Arabidopsis thaliana]

Found in search of D:\Sixue Chen-don't delete please\20091115MMZ\DEC01\2559.wiff

Nominal mass ( $M_r$ ): 22829; Calculated pI value: 9.10

NCBI BLAST search of [gi|15238284](#) against nr

Unformatted [sequence string](#) for pasting into other applications

Taxonomy: [Arabidopsis thaliana](#)

Fixed modifications: Carbamidomethyl (C)

Variable modifications: Deamidated (NQ), Gln->pyro-Glu (N-term Q), Oxidation (M)

Cleavage by Trypsin: cuts C-term side of KR unless next residue is P

Sequence Coverage: 15%

Matched peptides shown in **Bold Red**

```
1 MQGVIRSFVS GGNVVKGSVL QHLRVINPAI QPSVFCRSRE STQPARMEES
51 GFESTIISDV MKSKGKSADG SWLWCTIDDI VYDAVKSMITQ HNVGALVVVK
101 PGEQQALAGI ITERDYLRKI IVQGRSSKST KVGDIMTEEN KLITVTPETK
151 VLRAQLMTD NRIRHIPVIK DKGMIGMYSI GDVVRAVVHE HREELQRLNA
201 YIQGGY
```

Show predicted peptides also

Sort Peptides By

Residue Number  Increasing Mass  Decreasing Mass

| Start - End | Observed | Mr(expt)  | Mr(calc)  | Delta  | Miss | Sequence                                                                   |
|-------------|----------|-----------|-----------|--------|------|----------------------------------------------------------------------------|
| 132 - 141   | 568.3664 | 1134.7182 | 1134.5227 | 0.1956 | 0    | <b>K.VGDIMTEENK.L</b> ( <a href="#">Ions score 58</a> )                    |
| 132 - 141   | 576.3654 | 1150.7163 | 1150.5176 | 0.1987 | 0    | <b>K.VGDIMTEENK.L</b> Oxidation (M) ( <a href="#">Ions score 62</a> )      |
| 142 - 150   | 501.3762 | 1000.7379 | 1000.5805 | 0.1574 | 0    | <b>K.LITVTPETK.V</b> ( <a href="#">Ions score 58</a> )                     |
| 173 - 185   | 667.4555 | 1332.8965 | 1332.6894 | 0.2071 | 0    | <b>K.GMIGMVSIGDVVR.A</b> ( <a href="#">Ions score 78</a> )                 |
| 173 - 185   | 683.4539 | 1364.8933 | 1364.6792 | 0.2141 | 0    | <b>K.GMIGMVSIGDVVR.A</b> 2 Oxidation (M) ( <a href="#">Ions score 87</a> ) |

# gi|147799132 Hypothetical protein

## Protein View

Match to: gi|147799132 Score: 55

hypothetical protein [Vitis vinifera]

Found in search of C:\QStar Share Data\20091115MMZ\NOV15\343NOV15.wiff

Nominal mass ( $M_r$ ): 41562; Calculated pI value: 8.77

NCBI BLAST search of [gi|147799132](#) against nr

Unformatted [sequence string](#) for pasting into other applications

Taxonomy: [Vitis vinifera](#)

Fixed modifications: Carbamidomethyl (C)

Variable modifications: Oxidation (M), Phospho (ST)

Cleavage by Trypsin: cuts C-term side of KR unless next residue is P

Sequence Coverage: 2%

Matched peptides shown in **Bold Red**

```
1 MKDPRCMRPL DTSSFILFER NRFRTSKSKA LANRLNQLGY RSTSYSFPIE
51 VRLRDTKKPY LSSNGLPFLN QGICLHGKDN ETIVEMITRF TDLVNGLEAL
101 GKTYEESXKR HTKVTAVQEA KYLTKLPLEE LIGSLMTYEI NLVKKQQEGE
151 DKKKKSIALK VTTKEEEVEE EDKQSEKDED LIIITRKFNK FMRDERFKGR
201 RCKKLGHICY DCPFYKSKAK KRKKKAMMAT WSESEDESSK EENEKEVANM
251 CFMVIDELDE VNSNISDEDI HDVFQELYED LEKLGLKNAS LKKKVQQLEK
301 ELGEDKYVTH LGSFRPDQDK FRLASKVRGS PSSTRSDKID SLGSLDSQSG
351 RSVQSSL
```

Show predicted peptides also

Sort Peptides By

Residue Number  Increasing Mass  Decreasing Mass

| Start - End | Observed | Mr (expt) | Mr (calc) | Delta  | Miss | Sequence            |              |                                 |
|-------------|----------|-----------|-----------|--------|------|---------------------|--------------|---------------------------------|
| 103 - 110   | 547.3124 | 1092.6102 | 1092.4488 | 0.1614 | 1    | <b>K.TYEESTKR.H</b> | Phospho (ST) | <a href="#">(Ions score 26)</a> |
| 103 - 110   | 554.3108 | 1106.6070 | 1106.4281 | 0.1789 | 1    | <b>K.TYEESDKR.H</b> | Phospho (ST) | <a href="#">(Ions score 20)</a> |
| 103 - 110   | 554.3108 | 1106.6070 | 1106.4281 | 0.1789 | 1    | <b>K.TYEESDKR.H</b> | Phospho (ST) | <a href="#">(Ions score 29)</a> |

## Figure S7

This set of supplemental data contains the information of the coverage, peptides and MS/MS spectrum (if only one peptide identified for the protein) of each protein identified to be redox sensitive to MeJA treatment in guard cells by ICAT.

# gi|8745521 Ribulose-1,5-bisphosphate carboxylase / oxygenase

## Proteins Detected

| N | Unu... | Total | % Cov | Accessio... | Name                                             | Species        | Peptides(95%) | Biological Processes | Molecular Functions | PANTHER ID |
|---|--------|-------|-------|-------------|--------------------------------------------------|----------------|---------------|----------------------|---------------------|------------|
| 1 | 18.20  | 18.20 | 86.7  | gi 22595    | myrosinase [Brassica napus]                      | Brassica napus | 28            |                      |                     |            |
| 2 | 10.86  | 10.86 | 61.2  | gi 8745521  | ribulose-1,5-bisphosphate carboxylase/oxygena... | Brassica napus | 10            |                      |                     |            |
| 3 | 8.09   | 8.09  | 95.0  | gi 266891   | Ribulose bisphosphate carboxylase small chain... | BRANA          | 10            |                      |                     |            |

## Protein Group 2 - ribulose-1,5-bisphosphate carboxylase/oxygenase [Brassica napus]

| Proteins in Group |        |       |             | Peptides in Group |      |                             |                                                           |                |        |            |   |    |              |        |
|-------------------|--------|-------|-------------|-------------------|------|-----------------------------|-----------------------------------------------------------|----------------|--------|------------|---|----|--------------|--------|
| N                 | Unu... | Total | Accessio... | Con...            | Conf | Sequence                    | Modifications                                             | Cleavages      | ΔMass  | Prec MW    | z | Sc | Spectrum     | Type   |
| 2                 | 10.86  | 10.86 | gi 8745521  | 2.00              | 99   | CYHIEPVPGEETQFIAY           | ICAT-C(C)@1                                               | cleaved Y-V... | 0.1280 | 2222.16... | 2 | 15 | 5.1.1.1448.2 | Winner |
| 2                 | 0.00   | 10.86 | gi 30959... | 2.00              | 99   | ELGVPIVMHDYLTGGFTANTSLAHYCR | Oxidation(M)@8<br>ICAT-C:13C(9)(C)@26                     |                | 0.1033 | 3216.68... | 4 | 16 | 5.1.1.1445.3 | Winner |
| 2                 | 0.00   | 10.86 | gi 30959... | 2.00              | 99   | GHYLNATAGTCEEMMK            | ICAT-C(C)@11<br>Oxidation(M)@14<br>Oxidation(M)@15        |                | 0.1280 | 2013.98... | 3 | 16 | 5.1.1.1333.2 | Winner |
| 2                 | 0.00   | 10.86 | gi 167157   | 2.00              | 99   | GHYLNATAGTCEEMMKR           | ICAT-C:13C(9)(C)@11<br>Oxidation(M)@14<br>Oxidation(M)@15 | missed K-R...  | 0.1073 | 2179.09... | 3 | 21 | 4.1.1.1345.3 | Winner |
|                   | 0.00   | 10.86 | gi 15732... | 2.00              | 99   | VALEACVQAR                  | ICAT-C(C)@6                                               |                | 0.0746 | 1285.75... | 2 | 14 | 5.1.1.1359.2 | Winner |
|                   |        |       |             | 0.52              | 70   | PLLGCTIKPK                  | ICAT-C(C)@5                                               | cleaved R-P... | 0.0758 | 1295.83... | 3 | 13 | 5.1.1.1354.2 | Winner |
|                   |        |       |             | 0.14              | 27   | NEGRDLAVEGNEIIR             | Gly->Ser@3<br>Oxidation(N)@11                             | missed R-D...  | 0.1797 | 1730.03... | 3 | 13 | 6.1.1.1559.2 | Winner |
|                   |        |       |             | 0.07              | 14   | AVYECLR                     | ICAT-C:13C(9)(C)@5                                        |                | 0.0037 | 1088.57... | 2 | 10 | 4.1.1.1377.4 | Winner |
|                   |        |       |             | 0.05              | 10   | FLFCAEAIYK                  | ICAT-C:13C(9)(C)@4                                        |                | 0.0439 | 1439.80... | 2 | 10 | 4.1.1.1462.4 | Winner |
|                   |        |       |             | 0.04              | 9    | GRCYHIEPVPGEETQFIAY         | Oxidation(R)@2<br>Cys->Thr@3                              | cleaved Y-V... | 0.0990 | 2222.16... | 2 | 16 | 5.1.1.1448.2 | Winner |
|                   |        |       |             | 0.04              | 9    | YGRPLLGCTIKPK               | ICAT-C(C)@8<br>Thr->Pro@9<br>Methyl(I)@10                 |                | 0.0771 | 1682.04... | 4 | 13 | 5.1.1.1357.2 | Winner |
|                   |        |       |             | 0.00              | 1    | AVYECLRGGL                  | No ICAT(C)@5                                              | cleaved L-D... | 0.1125 | 1079.65... | 2 | 10 | 4.1.1.1380.4 | Winner |

## Protein Sequence Coverage - ribulose-1,5-bisphosphate carboxylase/oxygenase [Brassica napus]

**MSPQ**TETKASVGFKAGVKE YKLNYYTPEYETKD TDLA**AFRV**TPQPGVP PEEAGA AVAAESSTGTWTTVWDGLTSLDRYK**GR**CYHIEPVPGEETQFIAYVAYPLDLFEEG SVTNMFTSIVGNVFGFK  
 ALAALRLLEDLRIPPAYTKTFQGP HGIQVERDKLNKYGR**PL**LGCTIKPKLGLSAKNYGRAVYEC**LR**GGGLDF**TK**DDE NVNSQPFMRWRDRFLFCAEAIYKSQAETGEIKGHYLNATAGTCEEMMKRAIF  
 AR**EL**GVPIVMHDYLTGGFTANTSLAHYCRDNGLLLHIHRAMHAVIDR**QKNHGMHFRV**LAKALRLSGGDHVHAGTVVGKLEGDRE**ST**LGFDVLLRDDYVEKDRSRGIFFTQDWVSLPGVLPVASGGIHV  
 WHMPALTEIFGDDSVLQFGGGTLGHPWGNAPGAVANR**VA**LEACVQARNEGRDLAVEGNEIIREACKWSPELAAACEVWKEITFNFP**TI**DKLDGQD

# gi|17852 Ribulose bisphosphate carboxylase small chain, chloroplast precursor

## Proteins Detected

| N  | Unu... | Total | % Cov | Accessio... | Name                                                 | Species              | Peptides(95%) | Biological Processes | Molecular Functions | PANTHER ID |
|----|--------|-------|-------|-------------|------------------------------------------------------|----------------------|---------------|----------------------|---------------------|------------|
| 2  | 10.86  | 10.86 | 61.2  | gi 8745521  | ribulose-1,5-bisphosphate carboxylase/oxygenase...   | Brassica napus       | 10            |                      |                     |            |
| 3  | 8.09   | 8.09  | 95.0  | gi 266891   | Ribulose bisphosphate carboxylase small chain,...    | BRANA                | 10            |                      |                     |            |
| 4  | 6.02   | 6.02  | 69.4  | gi 15224... | cytoplasmic aconitate hydratase[Arabidopsis th...    | Arabidopsis thaliana | 4             |                      |                     |            |
| 5  | 5.00   | 5.00  | 42.0  | gi 15237... | translation elongation factor EF-Tu precursor, ch... | Arabidopsis thaliana | 3             |                      |                     |            |
| 6  | 4.77   | 4.77  | 78.7  | gi 60686... | oxalic acid oxidase [Brassica napus]                 | Brassica napus       | 4             |                      |                     |            |
| 7  | 4.29   | 4.29  | 55.5  | gi 15232... | reversibly glycosylated polypeptide-1 [Arabidops...  | Arabidopsis thaliana | 2             |                      |                     |            |
| 8  | 4.11   | 4.11  | 68.9  | gi 15238... | 5-methyltetrahydropteroyltriglutamate-homocyst...    | Arabidopsis thaliana | 4             |                      |                     |            |
| 9  | 4.04   | 4.04  | 62.4  | gi 15222... | glyceraldehyde-3-phosphate dehydrogenase, pu...      | Arabidopsis thaliana | 2             |                      |                     |            |
| 10 | 4.01   | 4.01  | 70.8  | gi 15219... | ATPase 70 kDa subunit, putative [Arabidopsis th...   | Arabidopsis thaliana | 4             |                      |                     |            |
| 11 | 4.00   | 4.00  | 79.3  | gi 8745523  | ATP synthase beta subunit [Brassica napus]           | Brassica napus       | 4             |                      |                     |            |
| 12 | 3.71   | 3.71  | 86.8  | gi 899226   | malate dehydrogenase [Brassica napus]                | Brassica napus       | 3             |                      |                     |            |

## Protein Group 3 - Ribulose bisphosphate carboxylase small chain, chloroplast precursor (RuBisCO small subunit)

| Proteins in Group |        |       |             |              | Peptides in Group |      |                    |                    |               |         |            |   |    |           |
|-------------------|--------|-------|-------------|--------------|-------------------|------|--------------------|--------------------|---------------|---------|------------|---|----|-----------|
| N                 | Unu... | Total | Accessio... | Name         | Con...            | Conf | Sequence           | Modifications      | Cleavages     | ΔMass   | Prec MW    | z | Sc | Spectr    |
| 3                 | 8.09   | 8.09  | gi 266891   | Ribulose b   | 2.00              | 99   | KLFLFGCTDSAQVLK    | ICAT-C:13C(9)(C)@7 | cleaved W-... | 0.1191  | 1855.15... | 3 | 15 | 5.1.1.141 |
| 3                 | 0.00   | 8.09  | gi 17850    | ribulose bi  | 2.00              | 99   | LPLFGCTDSAQVLK     | ICAT-C(C)@6        |               | -0.0471 | 1717.86... | 2 | 21 | 4.1.1.145 |
|                   | 0.00   | 8.09  | gi 11972... | ribulose bis | 2.00              | 99   | QVQCISFIAYKPPSFTGA | ICAT-C(C)@4        |               | 0.0669  | 2183.17... | 3 | 14 | 4.1.1.147 |
|                   | 0.00   | 8.09  | gi 17855    | rubisco ssu  | 2.00              | 99   | WI PCVE FELEHGFVYR | ICAT-C:13C(9)(C)@4 |               | 0.1311  | 2259.25... | 3 | 19 | 5.1.1.148 |
|                   | 0.00   | 8.09  | gi 170013   | chloroplast  | 0.00              | 18   | ELIAPKTEVDMLEIR    | ICAT-C:13C(9)(C)@5 | missed KT     | 0.0782  | 2052.10... | 2 | 11 | 5.1.1.138 |

## Protein Sequence Coverage - ribulose bisphosphate carboxylase /oxygenase small subunit [Brassica napus]

MASSMLSSAAVVTSPAQATMVAPFTGLKSSAAFVTRKANNDITSIASNGGRVSCMKVWPPVGGKKKFETLSYLPDLTEVELGKEVDYLLRNKWI PCVFELEHGFVYREHGSTPGYDGRYWTMWKLP  
 LFGCTDSAQVLKEVQECKTEYPNAFIRIIGFDNNRQVQCISFIAYKPPSFTGA

# gi|8745523 ATP synthase beta subunit

## Proteins Detected

| N  | Unu... | Total | % Cov | Accessio... | Name                                               | Species              | Peptides(95%) | Biological Processes | Molecular Functions | PANTHER ID |
|----|--------|-------|-------|-------------|----------------------------------------------------|----------------------|---------------|----------------------|---------------------|------------|
| 10 | 4.01   | 4.01  | 70.8  | gi 15219... | ATPase 70 kDa subunit, putative [Arabidopsis th... | Arabidopsis thaliana | 4             |                      |                     |            |
| 11 | 4.00   | 4.00  | 79.3  | gi 8745523  | ATP synthase beta subunit [Brassica napus]         | Brassica napus       | 4             |                      |                     |            |
| 12 | 3.71   | 3.71  | 86.8  | gi 899226   | malate dehydrogenase [Brassica napus]              | Brassica napus       | 3             |                      |                     |            |
| 13 | 3.61   | 3.61  | 57.1  | gi 15226... | putative triosephosphate isomerase [Arabidopsi...  | Arabidopsis thaliana | 3             |                      |                     |            |
| 14 | 3.41   | 3.41  | 37.8  | gi 14722... | unnamed protein product [Brassica napus]           | Brassica napus       | 3             |                      |                     |            |
| 15 | 3.10   | 3.10  | 63.4  | gi 15233... | cytosolic triosephosphatisomerase [Arabidopsis...  | Arabidopsis thaliana | 2             |                      |                     |            |

## Protein Group 11 - ATP synthase beta subunit [Brassica napus]

| Proteins in Group |        |       |             |                | Peptides in Group |      |                        |                                                       |                |         |            |   |    |           |  |
|-------------------|--------|-------|-------------|----------------|-------------------|------|------------------------|-------------------------------------------------------|----------------|---------|------------|---|----|-----------|--|
| N                 | Unu... | Total | Accessio... | Name           | Con...            | Conf | Sequence               | Modifications                                         | Cleavages      | ΔMass   | Prec MW    | z | Sc | Spectr    |  |
| 11                | 4.00   | 4.00  | gi 8745523  | ATP synthase   | 2.00              | 99   | DTLGQEINVTCVQQLLGNNR   | ICAT-C:13C(9)(C)@11                                   |                | 0.0170  | 2579.32... | 3 | 15 | 5.1.1.152 |  |
| 11                | 0.00   | 4.00  | gi 75336... | ATP synthase   | 2.00              | 99   | GRDTLGQEINVTCVQQLLGNNR | ICAT-C:13C(9)(C)@13                                   | missed R-D...  | 0.0801  | 2792.50... | 3 | 17 | 4.1.1.148 |  |
|                   | 0.00   | 4.00  | gi 56675... | atp synthase b | 0.00              | 1    | GRIAQIIGPVLDVAFPPGK    | Asp->Leu@12                                           | cleaved L-...  | -0.0296 | 1945.15... | 3 | 12 | 3.1.1.170 |  |
|                   | 0.00   | 4.00  | gi 14717... | ATP synthase   | 0.00              | < 1  | AVAMSATDGLKR           | Dehiomethyl(M)@4<br>Oxidation(D)@8<br>Oxidation(R)@12 | missed K-R...  | 0.0599  | 1202.68... | 2 | 9  | 3.1.1.175 |  |
|                   |        |       |             |                | 0.00              | < 1  | AVAMSATDGLKR           | Phospho(T)@7                                          | missed K-R...  | 0.2260  | 1298.83... | 2 | 7  | 3.1.1.171 |  |
|                   |        |       |             |                | 0.00              | < 1  | AVAMSATDGLKR           | Leu->Asp@10                                           | missed K-R...  | 0.2337  | 1220.81... | 2 | 10 | 2.1.1.187 |  |
|                   |        |       |             |                | 0.00              | < 1  | AVAMSATEGLKR           | Leu->Thr@10                                           | missed K-R...  | 0.1973  | 1220.81... | 2 | 9  | 2.1.1.187 |  |
|                   |        |       |             |                | 0.00              | < 1  | DEATAKATNLEMESKLLK     | Deamidated(N)@9                                       | cleaved I-D... | -0.0173 | 1878.90... | 2 | 5  | 4.1.1.166 |  |
|                   |        |       |             |                | 0.00              | 99   | DTLGQEINVTCVQQLLGNNR   | ICAT-C(C)@11                                          |                | 0.0915  | 2570.36... | 3 | 17 | 6.1.1.169 |  |
|                   |        |       |             |                | 0.00              | 97   | DTLGQEINVTCVQQLLGNNR   | ICAT-C:13C(9)(C)@11                                   |                | 1.1182  | 2580.42... | 3 | 14 | 5.1.1.153 |  |
|                   |        |       |             |                | 0.00              | < 1  | DTLGQEINVTCVQQLLGNNR   | ICAT-C:13C(9)(C)@11                                   |                | 0.0780  | 2580.36... | 3 | 8  | 4.1.1.153 |  |

## Protein Sequence Coverage - ATP synthase beta subunit [Brassica napus]

MRINPTTSDPAVSIREKNNLGR<sup>1</sup>IAQIIGPVLDVAFPPGKMPNIYNALVVKGR<sup>2</sup>DTLGQEINVTCVQQLLGNNRVRAVAMSATEGLKRGMDVDMGNPLSVFVGATLGRIFNVLGEFVNNLGPVDTLT  
 TSPHKSAFADLDLTTLSIFETGIKVVDLLAPYRRGGKIGLFGGAGVGKTVLIMELINNIKAHGGVSVFVGGERIREGNDLYMEMKESGVINELNLADSKVALVYGGQMNPPGARMRVLGTLALTM  
 AEYFRDVNEQDVLLFIDNIFRFVQAGSEVSALLGRMPSAVGYQPTLSAEMGSLQERITSTKKSITSIQAVYVPADDLTDPA<sup>3</sup>PATTF<sup>4</sup>FAHL<sup>5</sup>DATT<sup>6</sup>VLSRGLA<sup>7</sup>AKGYPAVDPLDST<sup>8</sup>STMLQPRIVGEEH  
 YETAQ<sup>9</sup>QVK<sup>10</sup>QL<sup>11</sup>QR<sup>12</sup>YKELQDI<sup>13</sup>IAILGLDELSEEDRLTVARARKIERFLSQPFVAEVFTGSPGKYVGLAETIRGFNLI<sup>14</sup>LSGEFDSLPEQAFYLVGNIDEATAKATNLEMESKLLK



# gi|899226 Malate dehydrogenase, mitochondrial precursor

## Proteins Detected

| N | Unu... | Total | % Cov | Accessio... | Name                                               | Species              | Peptides(95%) | Biological Processes | Molecular Functions | PANTHER ID |
|---|--------|-------|-------|-------------|----------------------------------------------------|----------------------|---------------|----------------------|---------------------|------------|
| 1 | 18.08  | 18.08 | 75.4  | gi 22595    | myrosinase [Brassica napus]                        | Brassica napus       | 26            |                      |                     |            |
| 2 | 10.54  | 10.54 | 70.6  | gi 8745521  | ribulose-1,5-bisphosphate carboxylase/oxygenas...  | Brassica napus       | 7             |                      |                     |            |
| 3 | 8.04   | 8.04  | 71.6  | gi 899226   | malate dehydrogenase [Brassica napus]              | Brassica napus       | 4             |                      |                     |            |
| 4 | 6.02   | 6.02  | 66.9  | gi 406727   | ribulose-1,5-bisphosphate carboxylase /oxygenas... | Brassica napus       | 7             |                      |                     |            |
| 5 | 5.40   | 5.40  | 41.0  | gi 8745523  | ATP synthase beta subunit [Brassica napus]         | Brassica napus       | 8             |                      |                     |            |
| 6 | 5.22   | 5.22  | 38.5  | gi 15218... | germin-like protein [Arabidopsis thaliana]         | Arabidopsis thaliana | 4             |                      |                     |            |

## Protein Group 3 - malate dehydrogenase [Brassica napus]

| Proteins in Group |        |       |             |                       | Peptides in Group |      |                          |                                                          |                |         |            |   |    |              |  |
|-------------------|--------|-------|-------------|-----------------------|-------------------|------|--------------------------|----------------------------------------------------------|----------------|---------|------------|---|----|--------------|--|
| N                 | Unu... | Total | Accessio... | Name                  | Con...            | Conf | Sequence                 | Modifications                                            | Cleavages      | ΔMass   | Prec MW    | z | Sc | Spectru      |  |
| 3                 | 8.04   | 8.04  | gi 899226   | malate dehydrogena... | 2.00              | 99   | AGKGSATLSMAYAGALFAD...   | Trimethyl(K)@3<br>Oxidation(M)@10<br>ICAT-C:13C(9)(C)@21 | missed K-...   | 0.1788  | 2510.47... | 3 | 19 | 5.1.1.1343.. |  |
| 3                 | 0.00   | 8.04  | gi 2497857  | Malate dehydrogena... | 2.00              | 99   | GLNGVPDVVECSYVQSTIT...   | Deamidated(N)@3<br>ICAT-C(C)@11                          |                | 0.2775  | 3127.81... | 3 | 15 | 5.1.1.1468.. |  |
|                   |        |       |             |                       | 2.00              | 99   | YCPHALVNMISNPVNSTVP...   | ICAT-C:13C(9)(C)@2<br>Oxidation(M)@9                     |                | 0.2152  | 3079.80... | 3 | 15 | 5.1.1.1381.. |  |
|                   |        |       |             |                       | 2.00              | 99   | YCPHALVNMISNPVNSTVP...   | ICAT-C(C)@2<br>Oxidation(M)@9                            | missed K-K...  | 0.2451  | 3198.90... | 4 | 18 | 5.1.1.1361.. |  |
|                   |        |       |             |                       | 0.02              | 5    | AKYCPHALVNMISNPVNST...   | Formyl@N-term<br>No ICAT(C)@4<br>Oxidation(M)@11         | cleaved I-A... | 0.2451  | 3198.90... | 4 | 19 | 5.1.1.1361.. |  |
|                   |        |       |             |                       | 0.02              | 4    | SMAYAGALFADACLK          | Oxidation(M)@2<br>ICAT-C:13C(9)(C)@13                    | cleaved L-...  | 0.2089  | 1783.08... | 3 | 11 | 4.1.1.1477.. |  |
|                   |        |       |             |                       | 0.00              | 1    | LNPLVS SLS LYDIANTPGV... | Methylthio(N)@2<br>Oxidation(N)@27                       |                | -0.8863 | 3067.67... | 4 | 12 | 5.1.1.1361.. |  |

## Protein Sequence Coverage - malate dehydrogenase [Brassica napus]

MFRSALVRSSASAKQSLRRSFSSGSVPERKVAAILGAAGGIQGPLALLMKLNPLVSSLSLYDIANTPGVAADVGHINTRSQVVGVMGDDNLAKALEGADLVIIPAGVPRKPGMTRDDLFNINAGIVKN  
 LWSAIAKYCPHALVNMISNPVNSTVPIAAEIKKAGMYDEKKLFGVTTLDVVRVKT SYAGKANVPAEVNVPVAVGHAGVTILPLFSQATPQAILSGDALVTTKRTQDGGTEVEEAKAGKGSATLSM  
 AYAGALFADACLKGLNGVPDVVECSYVQSTITELPFFASKVRLGKNGVEEVLDLGPLSDFEKEGLEALRPGIKSTIEKGVKFNQ

# gi|13487709 ADP-glucose pyrophosphorylase small subunit

## Proteins Detected

| N  | Unu... | Total | % Cov | Accessio... | Name                                                  | Species              | Peptides(95%) | Biological Processes | Molecular Functions | PANTHER ID |
|----|--------|-------|-------|-------------|-------------------------------------------------------|----------------------|---------------|----------------------|---------------------|------------|
| 16 | 3.56   | 3.56  | 58.1  | gi 15224... | cytoplasmic aconitate hydratase[Arabidopsis thal...   | Arabidopsis thaliana | 3             |                      |                     |            |
| 17 | 3.47   | 3.47  | 83.3  | gi 49369... | photosystem II protein [Brassica oleracea]            | Brassica oleracea    | 5             |                      |                     |            |
| 18 | 3.40   | 3.40  | 53.9  | gi 15239... | translation elongation factor eEF-1 alpha chain (g... | Arabidopsis thaliana | 2             |                      |                     |            |
| 19 | 3.22   | 3.22  | 69.0  | gi 13487... | ADP-glucose pyrophosphorylase small subunit [B...     | Brassica rapa sub... | 1             |                      |                     |            |
| 20 | 2.80   | 2.82  | 80.3  | gi 15226... | putative triosephosphate isomerase[Arabidopsis...     | Arabidopsis thaliana | 1             |                      |                     |            |
| 21 | 2.78   | 2.97  | 63.8  | gi 6503064  | myrosinase [Brassica napus]                           | Brassica napus       | 2             |                      |                     |            |

## Protein Group 19 - ADP-glucose pyrophosphorylase small subunit [Brassica rapa subsp. pekinensis]

| Proteins in Group |        |       |             |                  | Peptides in Group |      |                         |                                                                                             |                |        |            |   |    |              |
|-------------------|--------|-------|-------------|------------------|-------------------|------|-------------------------|---------------------------------------------------------------------------------------------|----------------|--------|------------|---|----|--------------|
| N                 | Unu... | Total | Accession # | Name             | Con...            | Conf | Sequence                | Modifications                                                                               | Cleavages      | ΔMass  | Prec MW    | z | Sc | Spectru      |
| 19                | 3.22   | 3.22  | gi 13487709 | ADP-glucose pyro | 2.00              | 99   | SCISEGAIIEDTLIMGADY...  | ICAT-C:13C(9)(C)@2<br>Oxidation(D)@11                                                       |                | 0.2731 | 3102.68... | 3 | 15 | 6.1.1.1602.. |
|                   | 0.00   | 3.22  | gi 7688095  | ADP-glucose pyro | 1.22              | 94   | LI DI PVSNCLNSNI SK     | ICAT-C:13C(9)(C)@9                                                                          |                | 0.1620 | 1965.22... | 3 | 13 | 5.1.1.1346.. |
|                   | 0.00   | 3.22  | gi 17865468 | Glucose-1-phosph | 0.00              | <1   | NRHLSRAYASNMGGYK        | Oxidation(M)@12                                                                             | cleaved L-N... | 0.2279 | 1840.10... | 3 | 10 | 5.1.1.1255.. |
|                   | 0.00   |       |             |                  | 0.00              | <1   | ANRAVPLGANYRLIDIPVS...  | Deamidated(R)@3<br>ICAT-C(C)@21<br>Deamidated(N)@25<br>Deamidated(N)@36<br>Deamidated(N)@41 | missed R-A...  | 0.6523 | 4850.15... | 5 | 8  | 7.1.1.1833.. |
|                   | 0.00   |       |             |                  | 0.00              | <1   | ATAFGLMKIDDEGRII EFA... |                                                                                             | missed K-I...  | 0.3819 | 3464.20... | 6 | 3  | 7.1.1.2014.. |
|                   | 0.00   |       |             |                  | 0.00              | <1   | AVPLGANYR               | Deamidated(N)@7                                                                             |                | 0.1738 | 960.6767   | 2 | 5  | 3.1.1.1789.. |
|                   | 0.00   |       |             |                  | 0.00              | <1   | DEGR                    |                                                                                             | cleaved D-D... | 0.1235 | 475.3261   | 1 | 3  | 4.1.1.1451.. |
|                   | 0.00   |       |             |                  | 0.00              | <1   | DEGR                    |                                                                                             | cleaved D-D... | 0.1481 | 475.3508   | 1 | 4  | 3.1.1.1658.. |
|                   | 0.00   |       |             |                  | 0.00              | <1   | ETDADI TVAAL PMDEK      |                                                                                             |                | 0.3268 | 1718.13... | 3 | 9  | 4.1.1.1484.. |

## Protein Sequence Coverage - ADP-glucose pyrophosphorylase small subunit [Brassica rapa subsp. pekinensis]

MATMAAIGSLKVPSSSSNHTRRLSSSSQRKTLFSSSSLTGEKLNPTQEIIISNLRWQREKNAIDSPRAVSDSQNSQTCLDPDASRVLGIILGGAGTRLYPLTKKRANRAVPLGANYRLIDIPVS  
 NCLNSNISKIYVLTQFNSASLNRHLSRAYASNMGGYKNEGFVEVLAAQQSPENPNWFQGTADAVRQYLWLFEEHNVLEFLVLAGDHLRYRMDYEFKIQAHRETDADITVAALPMDEKRSTAFGLMKIDD  
 EGRIIIEFAEKPKGEQLKAMKVDTTILGLDDERAKEIPFIASMGIVVSKNVMLDLLRDQFPGANDFGSEVIPGATDLGLRVQAYLDGYWEDIGTIEAFYNANLGIKKPVPDFSFYGRSAPIYTPQR  
 YLPPSKMLDADVTDVIGEGCVIKNCKIHHSVIGLRSCISEGAIIEDTLIMGADYYETDADRLLAAGRVPVIGIGENSHIKRAIIDKNARIGDNVKIINTDNVQEARETDGYFIKSGIVTVIKDAL  
 IPSGTVI

# gi|15220881 Putative aldehyde dehydrogenase

## Proteins Detected

| N  | Unu... | Total | % Cov | Accessio... | Name                                                           | Species              | Peptides(95%) | Biological Processes | Molecular Functions | PANTHER ID |
|----|--------|-------|-------|-------------|----------------------------------------------------------------|----------------------|---------------|----------------------|---------------------|------------|
| 28 | 2.06   | 2.06  | 57.1  | gi 15233... | probable H <sup>+</sup> -transporting ATPase[Arabidopsis th... | Arabidopsis thaliana | 2             |                      |                     |            |
| 29 | 2.02   | 2.02  | 60.3  | gi 15225... | hypothetical protein [Arabidopsis thaliana]                    | Arabidopsis thaliana | 1             |                      |                     |            |
| 30 | 2.01   | 2.01  | 63.3  | gi 15236... | hydroxymethyltransferase [Arabidopsis thaliana]                | Arabidopsis thaliana | 2             |                      |                     |            |
| 31 | 2.01   | 2.01  | 46.7  | gi 15220... | putative aldehyde dehydrogenase [Arabidopsis th...             | Arabidopsis thaliana | 1             |                      |                     |            |
| 32 | 2.01   | 2.01  | 67.1  | gi 15231... | mono dehydroascorbate reductase (NADH)- like...                | Arabidopsis thaliana | 1             |                      |                     |            |
| 33 | 2.00   | 2.00  | 63.9  | gi 15231... | CDC48 - like protein [Arabidopsis thaliana]                    | Arabidopsis thaliana | 1             |                      |                     |            |

## Protein Group 31 - putative aldehyde dehydrogenase [Arabidopsis thaliana]

| Proteins in Group |        |       |             |                   | Peptides in Group |      |                         |                                     |                |         |            |   |    |              |  |
|-------------------|--------|-------|-------------|-------------------|-------------------|------|-------------------------|-------------------------------------|----------------|---------|------------|---|----|--------------|--|
| N                 | Unu... | Total | Accession # | Name              | Con...            | Conf | Sequence                | Modifications                       | Cleavages      | ΔMass   | Prec MW    | z | Sc | Spectrum     |  |
| 31                | 2.01   | 2.01  | gi 15220881 | putative aldehyde | 2.00              | 99   | LGPALACGNTVVLK          | ICAT-C(C)@7                         |                | 0.2128  | 1582.10... | 3 | 15 | 4.1.1.1447.. |  |
|                   |        |       |             |                   | 0.01              | 3    | LIGGR                   |                                     | cleaved L-L... | 0.0175  | 514.3402   | 1 | 6  | 8.1.1.2230.. |  |
|                   |        |       |             |                   | 0.00              | < 1  | AKARALKRNVGDPF          |                                     | cleaved F-...  | 0.0535  | 1541.93... | 3 | 5  | 5.1.1.1649.. |  |
|                   |        |       |             |                   | 0.00              | < 1  | AKARALKRNVGDPPK         | Deamidated(R)@8<br>Deamidated(N)@9  | missed K-A...  | 0.1476  | 1672.08... | 4 | 8  | 5.1.1.1257.. |  |
|                   |        |       |             |                   | 0.00              | < 1  | ALKRNVGDPFKSGIEQGPQ...  | Phospho(S)@22                       | missed K-R...  | 0.1973  | 3067.67... | 4 | 7  | 5.1.1.1361.. |  |
|                   |        |       |             |                   | 0.00              | < 1  | ANNSRYGLAAGVFTQN LDT... | Oxidation(R)@5<br>Deamidated(R)@22  | missed R-Y...  | -0.2665 | 2792.11... | 5 | 6  | 6.1.1.1682.. |  |
|                   |        |       |             |                   | 0.00              | < 1  | ANNSRYGLAAGVFTQN LDT... | Deamidated(R)@5<br>Deamidated(N)@16 | missed R-Y...  | 0.7611  | 3118.35... | 6 | 4  | 7.1.1.2000.. |  |
|                   |        |       |             |                   | 0.00              | < 1  | ATDEIFGPVQTILK          | Oxidation(F)@6                      | cleaved I-A... | 0.1056  | 1546.92... | 3 | 8  | 6.1.1.1343.. |  |
|                   |        |       |             |                   | 0.00              | < 1  | AVEN                    | Deamidated(N)@4                     | cleaved A-...  | 0.1171  | 432.3027   | 1 | 3  | 1.1.1.1724.. |  |
|                   |        |       |             |                   | 0.00              | < 1  | DEGPWPKMTAYERSKI LFR... |                                     | cleaved F-...  | 0.8030  | 4834.18... | 5 | 4  | 7.1.1.1831.. |  |
|                   |        |       |             |                   | 0.00              | < 1  | DLDEVTADAVVDPVSLV...    |                                     | missed D-...   | 0.5764  | 2298.06... | 5 | 4  | 8.1.1.2488.. |  |

## Protein Sequence Coverage - putative aldehyde dehydrogenase [Arabidopsis thaliana]

MNRGAQRYSNLAAAVENTITPPVKVEHTQLLIGGRFVDVAVSGKTFPTLDPRNGEVIAQVSEGDVNRVAVAARKAFDEGPWPKMTAYERSKILFRFADLIEKHNDIAALETWVNGKPYEQSAQIE  
 VPMLARVFRYYAGWADKIHGTMTPGDGPHHVQTLHEPIGVAGQIIPWNFPLMLSWKLGALACGNTVVLKTAEQTPLSALLVGKLLHEAGLPDGVNIVSFGFATAGAAIASHMDVDKVAFTGSTDV  
 GKIIILELASKSNLKAVTLELGGKSPFIVCEDADVQAVELAHFALFFNQGCCAGSRTFVHERVYDFVEKAKARALKRNVGDPFKSGIEQGPQVDSEQFNKILKYIKHGVEAGATLQAGGDRLGSK  
 GYYIQPTVFSVDVKDMLIATDEIFGPVQTILKFKDLDEVIARANNSRYGLAAGVFTQNLDTAHRLMRALRVGTWVINCDFVLDASIPFGGKMSGIGREKGIYSLNNYLQVKAVVTSLKNPAWL

# gi|15239772 Aspartate aminotransferase Asp2

## Proteins Detected

| N  | Unu... | Total | % Cov | Accessio... | Name                                               | Species              | Peptides(95%) | Biological Processes | Molecular Functions | PANTHER ID |
|----|--------|-------|-------|-------------|----------------------------------------------------|----------------------|---------------|----------------------|---------------------|------------|
| 52 | 1.52   | 1.52  | 57.5  | gi 15231... | ketol-acid reductoisomerase [Arabidopsis thaliana] | Arabidopsis thaliana | 1             |                      |                     |            |
| 53 | 1.52   | 1.52  | 57.8  | gi 15239... | aspartate aminotransferase Asp2 [Arabidopsis th... | Arabidopsis thaliana | 1             |                      |                     |            |

## Protein Group 53 - aspartate aminotransferase Asp2 [Arabidopsis thaliana]

| Proteins in Group |        |       |             |                          |           | Peptides in Group |      |                     |                |                |        |            |
|-------------------|--------|-------|-------------|--------------------------|-----------|-------------------|------|---------------------|----------------|----------------|--------|------------|
| N                 | Unu... | Total | Accession # | Name                     | Spec      | Con...            | Conf | Sequence            | Modifications  | Cleavages      | ΔMass  | Prec MW    |
| 53                | 1.52   | 1.52  | gi 15239772 | aspartate aminotran...   | Arabidop  | 1.52              | 97   | VGALSIVCK           | ICAT-C(C)@8    |                | 0.1292 | 1115.76... |
|                   | 0.00   | 1.52  | gi 15239078 | aspartate aminotransf... | Arabidops | 0.00              | < 1  | GVTVAY              |                | cleaved L-G... | 0.0861 | 608.4031   |
|                   |        |       |             |                          |           | 0.00              | < 1  | AMADRIISMRKOLFELRTR | Oxidation(D)@4 | missed R-L...  | 0.1313 | 2438.41... |

## Protein Sequence Coverage - aspartate aminotransferase Asp2 [Arabidopsis thaliana]

MDSVFSNVARAPEDPILGVTVAYNNDPSPVKINLGVGAYRTEEGKPLVLDVVRKAEQQLVNDPSRVKEYIPIVIGISDFNKLAKLILGADSPAITESRVTTVQCLSGTGLSLRVGAEFKTHYHQSV  
 IYIPKPTWGNHPKVFNLAGLSVEYFRYYDPATRGLDFKGLLEDLGAAPSGAIVLLHACAHNPTGVDPTSEQWEQIRQLMRSKSLLPFDSAYQGFASGLDTDAQSVRTFVADGGECLIAQSYAKN  
 MGLYGERVVGALSIVCKSADVASKVESQVKLVVVRPMYSSPPIHGASIVATILKSSDMYNNWTIELKEMADRIKSMRQQLFQARGTPGDWSHIKQIGMFTFTGLNKEQVEFMTKEFHIMYTS  
 RISMAGLSSKTVPHLADAMHAAVTRLG

## Fragmentation Evidence

VGALSIVCK[CO]K

| Residue | b         | b+2      | y         | y+2      |
|---------|-----------|----------|-----------|----------|
| V       | 100.0757  | 50.5415  | 1116.6445 | 558.8259 |
| G       | 157.0972  | 79.0522  | 1017.5761 | 509.2917 |
| A       | 228.1343  | 114.5708 | 960.5547  | 480.7810 |
| L       | 341.2183  | 171.1128 | 889.5176  | 445.2624 |
| S       | 428.2504  | 214.6288 | 776.4335  | 388.7204 |
| I       | 541.3344  | 271.1709 | 689.4015  | 345.2044 |
| V       | 640.4028  | 320.7051 | 576.3174  | 288.6623 |
| C[COI]  | 970.5390  | 485.7731 | 477.2490  | 239.1281 |
| K       | 1098.6340 | 549.8206 | 147.1128  | 74.0600  |

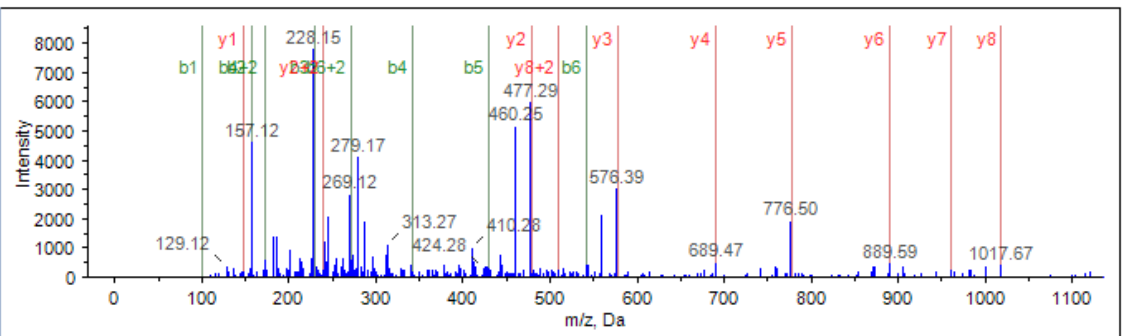

# gi|15231608 3-isopropylmalate dehydratase-like protein (small subunit)

## Proteins Detected

| N  | Unu... | Total | % Cov | Accessio... | Name                                                 | Species              | Peptides(95%) | Biological Processes | Molecular Functions | PANTHER ID |
|----|--------|-------|-------|-------------|------------------------------------------------------|----------------------|---------------|----------------------|---------------------|------------|
| 66 | 1.53   | 1.53  | 74.7  | gi 28974... | NAD-dependent isocitrate dehydrogenase beta s...     | Brassica napus       | 1             |                      |                     |            |
| 67 | 1.53   | 1.53  | 62.8  | gi 15231... | 3-isopropylmalate dehydratase-like protein (small... | Arabidopsis thaliana | 1             |                      |                     |            |
| 68 | 1.52   | 1.58  | 36.8  | gi 15239... | aspartate aminotransferase Asp2[Arabidopsis th...    | Arabidopsis thaliana | 1             |                      |                     |            |

## Protein Group 67 - 3-isopropylmalate dehydratase-like protein (small subunit) [Arabidopsis thaliana]

| Proteins in Group |        |       |             |                   | Peptides in Group |      |               |                                         |               |        |            |   |    |              |
|-------------------|--------|-------|-------------|-------------------|-------------------|------|---------------|-----------------------------------------|---------------|--------|------------|---|----|--------------|
| N                 | Unu... | Total | Accession # | Name              | Con...            | Conf | Sequence      | Modifications                           | Cleavages     | ΔMass  | Prec MW    | z | Sc | Spectrum     |
| 67                | 1.53   | 1.53  | gi 15231608 | 3-isopropylmalate | 1.52              | 97   | EHAPVCLGAAGAK | ICAT-C:13C(9)(C)@6                      |               | 0.1858 | 1458.95... | 3 | 13 | 5.1.1.1265.3 |
|                   | 0.00   | 1.52  | gi 15224221 | 3-isopropylmalate | 0.01              | 2    | EKLGSF        | Oxidation(F)@6                          | cleaved F-... | 0.0430 | 695.3920   | 1 | 7  | 1.1.1.1829.4 |
|                   | 0.00   | 1.52  | gi 15224222 | 3-isopropylmalate | 0.00              | < 1  | EDGSSLINHTTRK | Glu->pyro-Glu@N-term<br>Deamidated(N)@9 | missed R-K... | 0.0192 | 1552.80... | 3 | 7  | 3.1.1.1864.2 |

## Protein Sequence Coverage - 3-isopropylmalate dehydratase-like protein (small subunit) [Arabidopsis thaliana]

MATSQQFLNPTLFKSLASSNKNKSCSLCPSPFLQLKSASTIFNYKPLTSSSATTITRVAASSSDSGESITRETFHGLCFVLKDNIDTDQIIPAEYGTLPISIPEDREKLGFSALNGLPKFYNERFVVVPG  
EMKSKYSVIIIGGDNFPGCGSSR~~EHAPVCLGAAGAK~~AVVAESYARIFFRNCVATGEIFPLESEVRICDECKTGDVVTIEHKEDGSSLLINHTTRKEYKCLKPLGDAGPVIDAGGI~~FAYARKAGMIPSA~~

## Fragmentation Evidence

EHAPVC[C9]LGAAGAK

| Residue | b         | b+2      | y         | y+2      |
|---------|-----------|----------|-----------|----------|
| E       | 130.0499  | 65.5286  | 1459.7773 | 730.3923 |
| H       | 267.1088  | 134.0580 | 1330.7347 | 665.8710 |
| A       | 338.1459  | 169.5766 | 1193.6758 | 597.3415 |
| P       | 435.1987  | 218.1030 | 1122.6387 | 561.8230 |
| V       | 534.2671  | 267.6372 | 1025.5859 | 513.2966 |
| C[C9]   | 873.4334  | 437.2204 | 926.5175  | 463.7624 |
| L       | 986.5175  | 493.7624 | 587.3511  | 294.1792 |
| G       | 1043.5390 | 522.2731 | 474.2671  | 237.6372 |
| A       | 1114.5761 | 557.7917 | 417.2456  | 209.1264 |
| A       | 1185.6132 | 593.3102 | 346.2085  | 173.6079 |
| G       | 1242.6347 | 621.8210 | 275.1714  | 138.0893 |
| A       | 1313.6718 | 657.3395 | 218.1499  | 109.5786 |
| K       | 1441.7667 | 721.3870 | 147.1128  | 74.0600  |

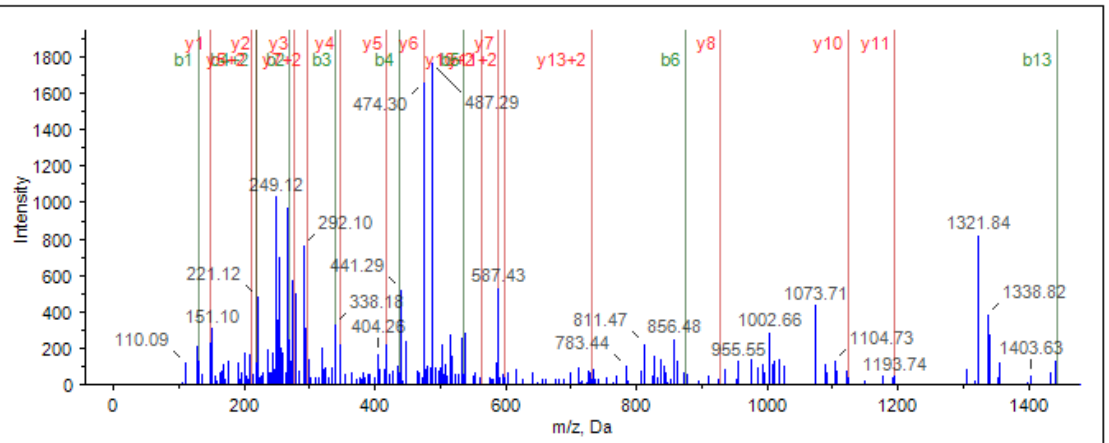

# gi|60686421 Oxalic acid oxidase

## Proteins Detected

| N | Unu... | Total | % Cov | Accessio... | Name                                                 | Species              | Peptides(95%) | Biological Processes | Molecular Functions | PANTHER ID |
|---|--------|-------|-------|-------------|------------------------------------------------------|----------------------|---------------|----------------------|---------------------|------------|
| 4 | 6.02   | 6.02  | 69.4  | gi 15224... | cytoplasmic aconitate hydratase[Arabidopsis th...    | Arabidopsis thaliana | 4             |                      |                     |            |
| 5 | 5.00   | 5.00  | 42.0  | gi 15237... | translation elongation factor EF-Tu precursor, ch... | Arabidopsis thaliana | 3             |                      |                     |            |
| 6 | 4.77   | 4.77  | 78.7  | gi 60686... | oxalic acid oxidase [Brassica napus]                 | Brassica napus       | 4             |                      |                     |            |
| 7 | 4.29   | 4.29  | 55.5  | gi 15232... | reversibly glycosylated polypeptide-1 [Arabidops...  | Arabidopsis thaliana | 2             |                      |                     |            |
| 8 | 4.11   | 4.11  | 68.9  | gi 15238... | 5-methyltetrahydropteroyltriglutamate-homocyst...    | Arabidopsis thaliana | 4             |                      |                     |            |
| 9 | 4.04   | 4.04  | 62.4  | gi 15222... | glyceraldehyde-3-phosphate dehydrogenase, pu...      | Arabidopsis thaliana | 2             |                      |                     |            |

## Protein Group 6 - oxalic acid oxidase [Brassica napus]

| Proteins in Group |        |       |             |                         | Peptides in Group |      |                  |                                   |                |        |            |   |   |  |
|-------------------|--------|-------|-------------|-------------------------|-------------------|------|------------------|-----------------------------------|----------------|--------|------------|---|---|--|
| N                 | Unu... | Total | Accession # | Name                    | Con...            | Conf | Sequence         | Modifications                     | Cleavages      | ΔMass  | Prec MW    | z | S |  |
| 6                 | 4.77   | 4.77  | gi 60686421 | oxalic acid oxidase [   | 2.00              | 99   | AETPAGYPCIRPIHVK | ICAT-C:13C(9)(C)@9                |                | 0.0222 | 1987.09... | 2 | 2 |  |
|                   | 0.00   | 4.77  | gi 15218535 | germin-like protein [Ar | 2.00              | 99   | SVQDFCVANLKR     | ICAT-C(C)@6                       | cleaved A-S... | 0.0935 | 1605.92... | 3 | 1 |  |
|                   | 0.00   | 4.77  | gi 914911   | germin-like protein     | 0.77              | 83   | SVQDFCVANLK      | ICAT-C(C)@6                       | cleaved A-S... | 0.0221 | 1449.75... | 2 | 1 |  |
|                   | 0.00   | 4.77  | gi 1169941  | Germin-like protein 1.  | 0.00              | 71   | AETPAGYPCIRPIHVK | ICAT-C:13C(9)(C)@9                |                | 0.1912 | 1987.26... | 4 | 1 |  |
|                   |        |       |             |                         | 0.00              | 99   | AETPAGYPCIRPIHVK | ICAT-C(C)@9                       |                | 0.1294 | 1978.17... | 4 | 1 |  |
|                   |        |       |             |                         | 0.00              | 32   | AETPAGYPCIRPIHVK | ICAT-C(C)@9                       |                | 0.1842 | 1978.23... | 4 | 1 |  |
|                   |        |       |             |                         | 0.00              | < 1  | AETPAGYPCIRPIHVK | ICAT-C:13C(9)(C)@9<br>His->Gln@14 |                | 0.1668 | 1978.24... | 4 | 1 |  |
|                   |        |       |             |                         | 0.00              | 34   | AETPAGYPCIRPIHVK | ICAT-C:13C(9)(C)@9                |                | 0.2004 | 1987.27... | 4 | 1 |  |
|                   |        |       |             |                         | 0.00              | 1    | AETPAGYPCIRPIHVK | ICAT-C(C)@9                       |                | 0.1966 | 1978.24... | 4 |   |  |
|                   |        |       |             |                         | 0.00              | 99   | AETPAGYPCIRPIHVK | ICAT-C:13C(9)(C)@9                |                | 0.1601 | 1987.23... | 4 | 1 |  |
|                   |        |       |             |                         | 0.00              | 29   | AETPAGYPCIRPIHVK | ICAT-C(C)@9                       |                | 0.2246 | 1978.27... | 4 | 1 |  |

## Protein Sequence Coverage - oxalic acid oxidase [Brassica napus]

MLR I I F L L S L L F A L S N A S V Q D F C V A N L K R A E T P A G Y P C I R P I H V K A S D F V F S L G T P G N T T N I I S A A V T P G F V A Q F P A L N G L G I S T A R L D L A P K G V I P M H T H P G A S E V L F V L D G S I T A G F I S S A N S V Y V  
Q T L K P G Q M V F P Q G L L H F Q I N A G K T P A A A F V T F S S A S P G L Q I L D F A L F A N T L S T E L V S A T T F L P P A T V K T I L K G V L G G T G

# gi|15238686 Homocysteine S-methyltransferase

## Proteins Detected

| N | Unu... | Total | % Cov | Accessio... | Name                                                 | Species              | Peptides(95%) | Biological Processes | Molecular Functions | PANTHER ID |
|---|--------|-------|-------|-------------|------------------------------------------------------|----------------------|---------------|----------------------|---------------------|------------|
| 4 | 6.02   | 6.02  | 69.4  | gi 15224... | cytoplasmic aconitate hydratase[Arabidopsis th...    | Arabidopsis thaliana | 4             |                      |                     |            |
| 5 | 5.00   | 5.00  | 42.0  | gi 15237... | translation elongation factor EF-Tu precursor, ch... | Arabidopsis thaliana | 3             |                      |                     |            |
| 6 | 4.77   | 4.77  | 78.7  | gi 60686... | oxalic acid oxidase [Brassica napus]                 | Brassica napus       | 4             |                      |                     |            |
| 7 | 4.29   | 4.29  | 55.5  | gi 15232... | reversibly glycosylated polypeptide-1[Arabidops...   | Arabidopsis thaliana | 2             |                      |                     |            |
| 8 | 4.11   | 4.11  | 68.9  | gi 15238... | 5-methyltetrahydropteroyltriglutamate-homocyst...    | Arabidopsis thaliana | 4             |                      |                     |            |
| 9 | 4.04   | 4.04  | 62.4  | gi 15222... | glyceraldehyde-3-phosphate dehydrogenase, pu...      | Arabidopsis thaliana | 2             |                      |                     |            |

## Protein Group 8 - 5-methyltetrahydropteroyltriglutamate-homocysteine S-methyltransferase [Arabidopsis thaliana]

| Proteins in Group |        |       |             |                                                                        | Peptides in Group |      |                                     |                                                                          |                |         |            |   |   |
|-------------------|--------|-------|-------------|------------------------------------------------------------------------|-------------------|------|-------------------------------------|--------------------------------------------------------------------------|----------------|---------|------------|---|---|
| N                 | Unu... | Total | Accession # | Name                                                                   | Con...            | Conf | Sequence                            | Modifications                                                            | Cleavages      | ΔMass   | Prec MW    | z | S |
| 8                 | 4.11   | 4.11  | gi 15238686 | 5-methyltetrahydropteroyltriglutamate-homocysteine S-methyltransferase | 2.00              | 99   | CVKPFVIYGDVSRPK                     | ICAT-C(C)@1                                                              |                | 0.1550  | 1884.18... | 4 | 1 |
|                   | 0.00   | 4.00  | gi 15228634 | putative methionine synthase                                           | 2.00              | 99   | HE TCYQIALAIKDEVEDLEK               | ICAT-C(C)@4                                                              |                | 0.2187  | 2573.48... | 4 | 1 |
|                   |        |       |             |                                                                        | 0.11              | 22   | VNRKMLAVLEQNILWVNPDCGLK             | Oxidation(N)@2<br>Deamidated(Q)@10<br>Trp->Phe@14<br>ICAT-C:13C(9)(C)@19 | missed K-...   | -0.0736 | 2710.37... | 3 | 1 |
|                   |        |       |             |                                                                        | 0.00              | < 1  | VP ELGPEVKFSYASHK                   | Oxidation(K)@16                                                          | cleaved I-V... | -0.1436 | 1802.77... | 2 | 1 |
|                   |        |       |             |                                                                        | 0.00              | < 1  | AAKGVDKSFELLSLLPKI LP               | Oxidation(F)@9<br>Oxidation(P)@20                                        | cleaved P-I... | -0.0548 | 2170.20... | 4 |   |
|                   |        |       |             |                                                                        | 0.00              | < 1  | AAKGVDKSFELLSLLPKI LP               | Oxidation(F)@9<br>Oxidation(P)@20                                        | cleaved P-I... | -0.0575 | 2170.20... | 4 |   |
|                   |        |       |             |                                                                        | 0.00              | < 1  | AAKGVDKSFELLSLLPKI LPIYKEVI TE L... | Oxidation(K)@3                                                           | cleaved E-...  | -0.4370 | 4526.09... | 5 |   |
|                   |        |       |             |                                                                        | 0.00              | < 1  | AAKGVDKSFELLSLLPKI LPIYKEVI TE L... | Oxidation(P)@42<br>Oxidation(K)@52                                       | missed K-...   | -0.1811 | 5751.98... | 6 |   |

## Protein Sequence Coverage - 5-methyltetrahydropteroyltriglutamate-homocysteine S-methyltransferase [Arabidopsis thaliana]

MASHIVGYPRMGPKRELKFALESFWDGK**STAEDLQKVSADLR**SSIWKQMSAAGTKFIPSNTFAYHDQVLDTTAMLGAVPPRYGYTGGEIGLDVYFSMARGNASVPAMEMTKWFDNTNYHYIVPELGPEV  
 NFSYASHKAVNEYKEAKALGVDTPVPLVGPVSYLLLSKAAKGVDKSFELLSLLPKILPIYKEVITELKAAGATWIQLDEPVLVMDLEGQKQLQAFGTGAYAELESTLSGLNVLVETVYFADIPAEAYKTLT  
 SLKGVTAFGFDLVRGKTKLLDLVKAGFPEGKYL FAGVVDGRNIWANDFAASLSTLQALEGIVGDKLVVSTSCSLLTAVDLINETKLDDEIKSWLAFAAQKVVEVNALAKALAGQKDEALFSANAAL  
 ASRRSSSPRVNTEGVQKAAALKGS DHRRAITNVSARLDAQKQLNLPILPTTTIGSFPPQIVELRRVREYKAKKVSEEDYVKAIKEEIKKVVDLQEELDIDVLVHGEPEPNDMVEYFGEQLSGFAFTAN  
 GWVQSYGSR**CVKPPVIYGDVSRPKAMTVFWSAMAQMS**TRPMKGLTG PVTILNWSFVRNDQPR**HE TCYQIALAIKDEVEDLEKGGIGVIQIDEAALREGLPLRKSEHAFYLDWAVHSFRITNCGVQD**  
 STQIHTMCSYSHFNDDIHSIIDMDADVIT IENSR**SDEKLLSVFREGVKYAGIGPGVYDIHSPRIPSS**EIADRVNKMMLAVLEQNILWVNPDCGLKTRKYTEVVKPKALNMVDAAKLIRSQLASAK

# gi|89257688 Streptomyces cyclase / dehydrase family protein

## Proteins Detected

| N  | Unu... | Total | % Cov | Accession #  | Name                                                   | Species              | Peptides(95%) | Biological Processes | Molecular Functions | PANT |
|----|--------|-------|-------|--------------|--------------------------------------------------------|----------------------|---------------|----------------------|---------------------|------|
| 46 | 2.00   | 2.00  | 56.4  | gi 157849770 | ERD12 protein [Brassica rapa]                          | Brassica rapa        | 1             |                      |                     |      |
| 47 | 2.00   | 2.00  | 55.0  | gi 89257688  | Streptomyces cyclase/dehydrase family protein [...]    | Brassica oleracea    | 1             |                      |                     |      |
| 48 | 1.88   | 3.88  | 58.8  | gi 15236220  | mitochondrial elongation factor Tu [Arabidopsis th...] | Arabidopsis thaliana | 3             |                      |                     |      |

## Protein Group 47 - Streptomyces cyclase/dehydrase family protein [Brassica oleracea]

| Proteins in Group |        |       |             |                                                     | Peptides in Group |      |                           |                                   |           |        |            |   |    |           |  |
|-------------------|--------|-------|-------------|-----------------------------------------------------|-------------------|------|---------------------------|-----------------------------------|-----------|--------|------------|---|----|-----------|--|
| N                 | Unu... | Total | Accession # | Name                                                | Con...            | Conf | Sequence                  | Modifications                     | Cleavages | ΔMass  | Prec MW    | z | Sc | Spectr    |  |
| 47                | 2.00   | 2.00  | gi 89257688 | Streptomyces cyclase/dehydrase family protein [...] | 2.00              | 99   | SE LAQSI AE FHTYHLGPGS... | ICAT-C:13C(9)(C)@20               |           | 0.3255 | 3161.86... | 5 | 16 | 5.1.1.131 |  |
|                   |        |       |             |                                                     | 0.00              | 1    | MPSQLTPEER                | Oxidation(M)@1<br>Deamidated(Q)@4 |           | 0.1901 | 1203.73... | 2 | 9  | 5.1.1.124 |  |

## Protein Sequence Coverage - Streptomyces cyclase/dehydrase family protein [Brassica oleracea]

MPSQLTPEERSELAQSI AE FHTYHLGPGSCSSLHAQR I HAPPEIVWSV VRRFDKPQTYKHF I KSCSVEDGFEMR VGCTRAVNVISGLPANTSTERLDILDDERRVTFGFSIIGGEHRLTNYKSVTTVHR FEKERRIWTVVLESYVVDMP EGNSEDDTRMFADTVVKLNLQK L ATVTI EAMARNAGDGSQAQT

## Fragmentation Evidence

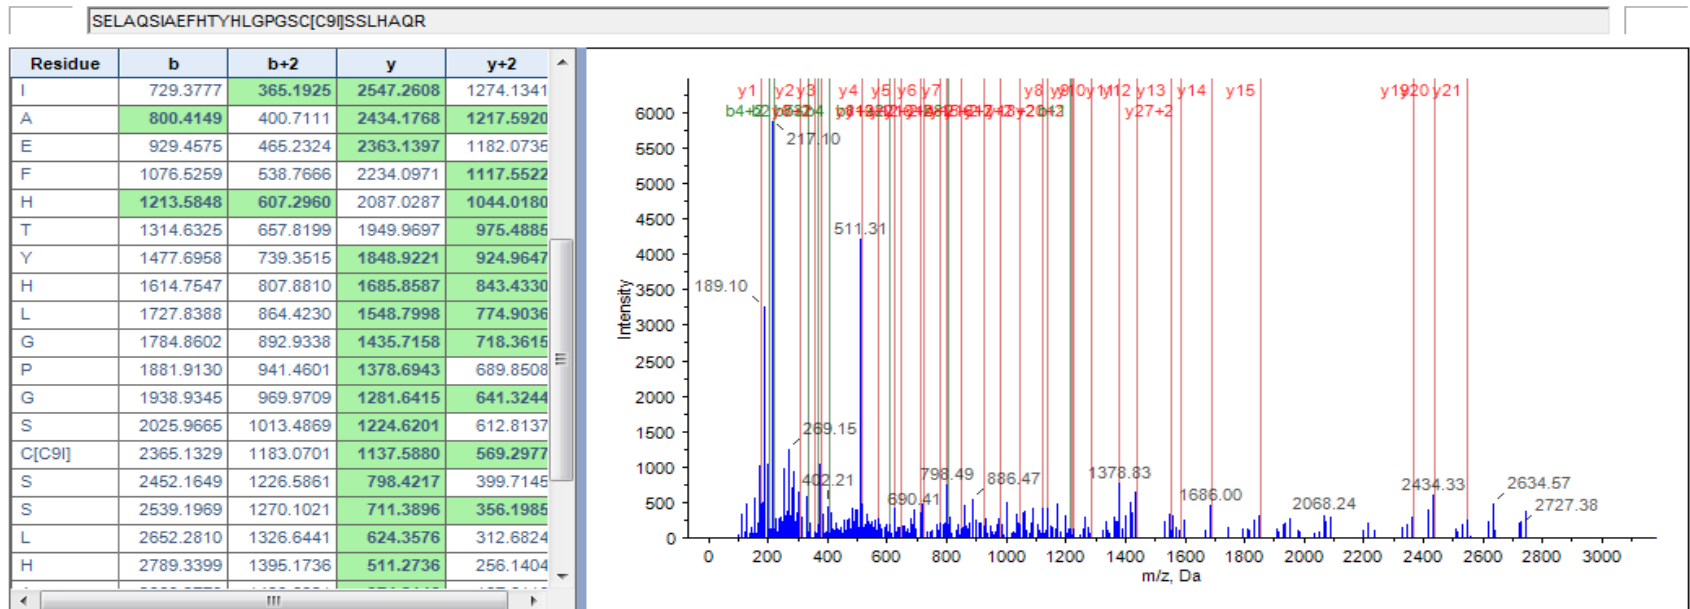



# gi|15235668 Extensin-like protein

## Proteins Detected

| N  | Unu... | Total | % Cov | Accession # | Name                                         | Species              | Peptides(95%) | Biological Processes | Molecular Functions | PANT |
|----|--------|-------|-------|-------------|----------------------------------------------|----------------------|---------------|----------------------|---------------------|------|
| 38 | 2.00   | 2.00  | 40.5  | gi 15235668 | extensin-like protein [Arabidopsis thaliana] | Arabidopsis thaliana | 1             |                      |                     |      |
| 39 | 2.00   | 2.00  | 62.0  | gi 15224339 | unknown protein [Arabidopsis thaliana]       | Arabidopsis thaliana | 1             |                      |                     |      |

## Protein Group 38 - extensin-like protein [Arabidopsis thaliana]

| Proteins in Group |        |       |             |                      | Peptides in Group |      |              |                    |                |        |            |   |    |         |
|-------------------|--------|-------|-------------|----------------------|-------------------|------|--------------|--------------------|----------------|--------|------------|---|----|---------|
| N                 | Unu... | Total | Accession # | Name                 | Con...            | Conf | Sequence     | Modifications      | Cleavages      | ΔMass  | Prec MW    | z | Sc | Spei    |
| 38                | 2.00   | 2.00  | gi 15235668 | extensin-like protei | 2.00              | 99   | IPASICQLPK   | ICAT-C:13C(9)(C)@6 |                | 0.1267 | 1304.88... | 2 | 14 | 4.1.1.1 |
|                   | 0.00   | 2.00  | gi 15230120 | disease resistance p | 0.00              | < 1  | ADIGRLKNVTVF | Deamidated(R)@5    | cleaved P-A... | 0.1618 | 1349.88... | 2 | 10 | 3.1.1.1 |

## Protein Sequence Coverage - extensin-like protein [Arabidopsis thaliana]

**MKRTIQILLFFFL**INLTNALSISSDGGVLSDNEVRHIQRRQLLEFAERS**SVKITVDPSLNFNENPRLRNAYIALQAWKQAILSDPN**NFTSNWIGSNVCNYTGVFCSALDNRKIRTVAGIDLNHADIAG  
 YLPEELGLLSDLALFHVNSNRF CGTVPHRFNRLKLLFELDLSNNRFAAGKFPVVLQPLSLKFLDLRFNEFEGTVPKELFSK**DLDAIFINHNRRF**FELPENFGDSPVSVIVLANNRHFHGCVPSSLVEMK  
**NLNEIFMNGLSCLPSDIGRLKNVTVF**DVSNELVGLPE SVGEMVSVEQLNVAHNMLSGK**IPASICQLPKLENFTYSYNFTGEAPVCLRLPEFDDRRNCLPGRPAQR**SPGQCKA**FLSRPPVNCG**  
**SFSCGRSVSRPPVVTPLPPPSLSPPPPAPIFSTPPTLTSPPPPSP**PPPPVYSPPPPPPPPPVYSPPPPPPPPPPVYSPPPPPPPPPPVYSPPPPPPPPVYSPPPPPPPPVYSPP  
**PPPPVYSPPPPSPAPTVPYCTRPP**PPPHSPPPPQFSPPPPEFYSSPPPHSS**PPPHSPPPHSP**PPPIY**PYLSPPPPPTPVSSPPPTPVYSSPPPPPCIEPPPP**PCIEYSPPPPPVHYSS  
 PPPPPVYSSPPPPVYSSPPPPVHYSSPPPEVHYSSPPSPVHYSSPPPPSAPCEESPFPVHHSPPPMVHHSPPPPVIHQSPPPSPPEYEGPLPPVIGVSYASPPPPPFY

## Fragmentation Evidence

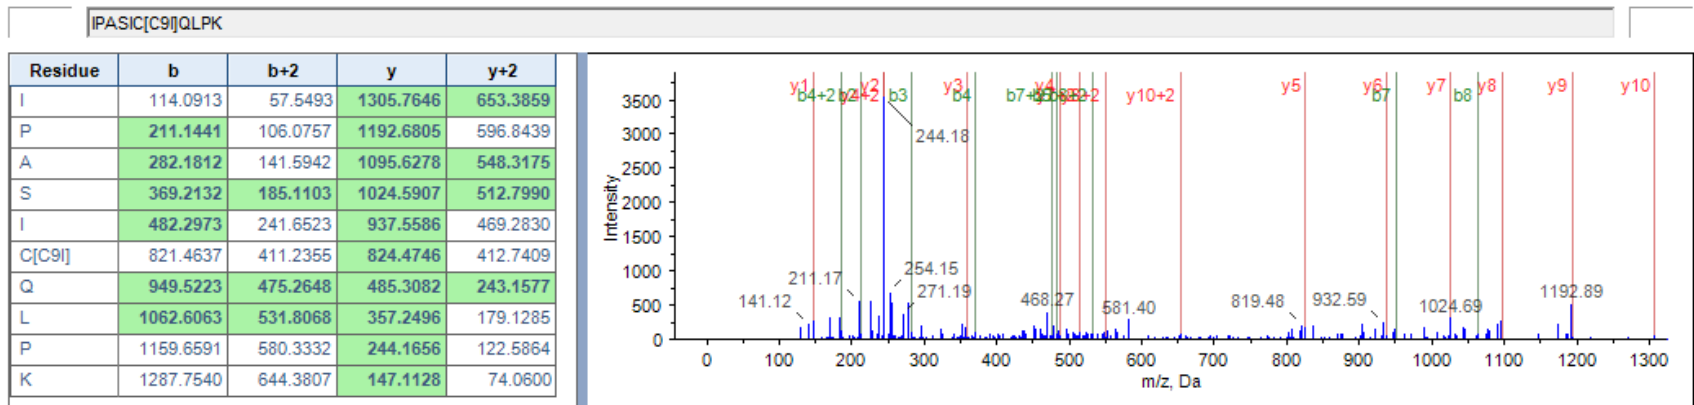

# gi|15235889 Multicatalytic endopeptidase complex, beta subunit

## Proteins Detected

| N  | Unu... | Total | % Cov | Accession # | Name                                                | Species              | Peptides(95%) | Biological Processes | Molecular Functions | PANT |
|----|--------|-------|-------|-------------|-----------------------------------------------------|----------------------|---------------|----------------------|---------------------|------|
| 26 | 2.20   | 2.20  | 39.1  | gi 15231715 | fructose biphosphate aldolase- like protein [Ara... | Arabidopsis thaliana | 1             |                      |                     |      |
| 27 | 2.07   | 2.07  | 43.3  | gi 15235889 | multicatalytic endopeptidase complex, proteasom...  | Arabidopsis thaliana | 1             |                      |                     |      |
| 28 | 2.06   | 2.06  | 57.1  | gi 15233891 | probable H+-transporting ATPase[Arabidopsis th...   | Arabidopsis thaliana | 2             |                      |                     |      |
| 29 | 2.02   | 2.02  | 60.3  | gi 15225545 | hypothetical protein [Arabidopsis thaliana]         | Arabidopsis thaliana | 1             |                      |                     |      |
| 30 | 2.01   | 2.01  | 63.3  | gi 15236375 | hydroxymethyltransferase [Arabidopsis thaliana]     | Arabidopsis thaliana | 2             |                      |                     |      |
| 31 | 2.01   | 2.01  | 46.7  | gi 15220881 | putative aldehyde dehydrogenase[Arabidopsis th...   | Arabidopsis thaliana | 1             |                      |                     |      |
| 32 | 2.01   | 2.01  | 67.1  | gi 15231702 | monodehydroascorbate reductase (NADH)- like...      | Arabidopsis thaliana | 1             |                      |                     |      |
| 33 | 2.00   | 2.00  | 63.9  | gi 15231775 | CDC48-like protein [Arabidopsis thaliana]           | Arabidopsis thaliana | 1             |                      |                     |      |

## Protein Group 27 - multicatalytic endopeptidase complex, proteasome precursor, beta subunit [Arabidopsis thaliana]

| Proteins in Group |        |       |             |                              | Peptides in Group |      |                        |                                         |               |         |            |   |      |  |
|-------------------|--------|-------|-------------|------------------------------|-------------------|------|------------------------|-----------------------------------------|---------------|---------|------------|---|------|--|
| N                 | Unu... | Total | Accession # | Name                         | Con...            | Conf | Sequence               | Modifications                           | Cleavages     | ΔMass   | Prec MW    | z | Sc   |  |
| 27                | 2.07   | 2.07  | gi 15235889 | multicatalytic endop... Ara  | 2.00              | 99   | ITQLTDNVYVCR           | ICAT-C:13C(9)(C)@11                     |               | 0.2138  | 1660.08... | 3 | 15 4 |  |
|                   | 0.00   | 2.07  | gi 41352685 | putative proteasome 2... Bra | 0.07              | 15   | TSTGMVYVANRASDK        | Deamidated(R)@10<br>Oxidation(K)@14     | missed R-A... | 0.3015  | 1516.98... | 3 | 11 4 |  |
|                   | 0.00   | 2.07  | gi 41352683 | putative proteasome 2... Bra | 0.00              | < 1  | ASDKITQLTDNVYVCRSGS... | Deamidated(N)@11<br>ICAT-C:13C(9)(C)@15 | missed K.I... | 0.9598  | 3584.71... | 6 | 5 6  |  |
|                   |        |       |             |                              | 0.00              | < 1  | AVSLAIARDGASGGVVR      | Deamidated(R)@8                         | missed R-D... | 0.0814  | 1598.95... | 2 | 7 3  |  |
|                   |        |       |             |                              | 0.00              | < 1  | AVSLAIARDGASGGVVRIV... | Methyl(R)@8                             | missed R-D... | 0.0276  | 3602.94... | 4 | 8 6  |  |
|                   |        |       |             |                              | 0.00              | 33   | ITQLTDNVYVCR           | ICAT-C(C)@11                            |               | 0.2110  | 1651.05... | 3 | 11 4 |  |
|                   |        |       |             |                              | 0.00              | < 1  | LNLDAPHSMGTTII         | Oxidation(D)@4                          | cleaved D-... | -0.0227 | 1497.72... | 2 | 7 2  |  |

## Protein Sequence Coverage - multicatalytic endopeptidase complex, proteasome precursor, beta subunit [Arabidopsis thaliana]

MDLNLDAPHSMGTTIIIGVTYNGGVVLGADSRSTSTGMVYVANRASDKITQLTDNVYVCRSGSAADSQVVSDYVRYFLHQHTIQHGQPATVKVSANLIRMLAYNNKNMLQTGLIVGGWDKYEGGKIYGIPLGGTIVVEQPFPAIGSGSSSYLYGFFDQAWKDNMTKEEAEQLVVKAVSLAIARDGASGGVVRVVIINSEGVTRNFYPGDKLQLWHEELPQNSLLDILNAAGPEPMAM

# gi|15237059 Translation elongation factor EF-Tu precursor, chloroplast

## Proteins Detected

| N | Unu... | Total | % Cov | Accession # | Name                                                 | Species              | Peptides(95%) | Biological Processes | Molecular Functions | PANTHER ID |
|---|--------|-------|-------|-------------|------------------------------------------------------|----------------------|---------------|----------------------|---------------------|------------|
| 4 | 6.02   | 6.02  | 69.4  | gi 15224580 | cytoplasmic aconitate hydratase [Arabidopsis th...   | Arabidopsis thaliana | 4             |                      |                     |            |
| 5 | 5.00   | 5.00  | 42.0  | gi 15237059 | translation elongation factor EF-Tu precursor, ch... | Arabidopsis thaliana | 3             |                      |                     |            |
| 6 | 4.77   | 4.77  | 78.7  | gi 60686421 | oxalic acid oxidase [Brassica napus]                 | Brassica napus       | 4             |                      |                     |            |
| 7 | 4.29   | 4.29  | 55.5  | gi 15232865 | reversibly glycosylated polypeptide-1 [Arabidops...  | Arabidopsis thaliana | 2             |                      |                     |            |
| 8 | 4.11   | 4.11  | 68.9  | gi 15238686 | 5-methyltetrahydropteroyltriglutamate-homocyst...    | Arabidopsis thaliana | 4             |                      |                     |            |

## Protein Group 5 - translation elongation factor EF-Tu precursor, chloroplast [Arabidopsis thaliana]

| Proteins in Group |        |       |             |                      | Peptides in Group |      |                     |                                                                                              |               |         |            |   |   |  |
|-------------------|--------|-------|-------------|----------------------|-------------------|------|---------------------|----------------------------------------------------------------------------------------------|---------------|---------|------------|---|---|--|
| N                 | Unu... | Total | Accession # | Name                 | Con...            | Conf | Sequence            | Modifications                                                                                | Cleavages     | ΔMass   | Prec MW    | z | S |  |
| 5                 | 5.00   | 5.00  | gi 15237059 | translation elongati | 2.00              | 99   | HSPFFAGYRQIFY       |                                                                                              | cleaved Y-... | 0.1247  | 1615.88... | 3 | 1 |  |
|                   |        |       |             |                      | 2.00              | 99   | HYAHVDCPGHADYVK     | ICAT-C(C)@7                                                                                  |               | 0.1966  | 1938.08... | 4 | 2 |  |
|                   |        |       |             |                      | 1.00              | 90   | IVVE LIVPVACEQGMR   | ICAT-C:13C(9)(C)@11<br>Oxidation(M)@15                                                       |               | 0.1306  | 2007.22... | 3 | 1 |  |
|                   |        |       |             |                      | 0.00              | < 1  | AGDNVGLLLRGIQKADIQR | Deamidated(N)@4<br>Deamidated(R)@10<br>Oxidation(K)@14<br>Oxidation(R)@19                    | cleaved L-... | -0.0319 | 2070.07... | 3 |   |  |
|                   |        |       |             |                      | 0.00              | < 1  | AI SAPAACS SSSR     | Protein Terminal<br>Acetyl@N-term<br>Oxidation(P)@5<br>ICAT-C:13C(9)(C)@8<br>Oxidation(R)@13 | cleaved M-... | 0.2280  | 1516.95... | 3 |   |  |
|                   |        |       |             |                      | 0.00              | < 1  | EEGGR               |                                                                                              |               | 0.1384  | 546.3782   | 1 |   |  |
|                   |        |       |             |                      | 0.00              | < 1  | EEGGR               |                                                                                              |               | 0.0780  | 546.3178   | 1 |   |  |

## Protein Sequence Coverage - translation elongation factor EF-Tu precursor, chloroplast [Arabidopsis thaliana]

**MAISAPAACSSSSR**ILCSYSSPSPSLCPAISTSGKCLKTLTLSSSFLPSYSLTTTSSASQSTRRSFTVRAARGKFERKKPHVNIPTIGHVDHGKTTTLAALTMALASIGSSVAKKYDEIDAAPPEARARGI  
 TINTATVEYETENR**HYAHVDCPGHADYVK**NMITGAAQMDGAILVVSADGMPQTK**EHILLAKQVGV**PDMVFLNKEDQVDDAELLELVE**EVRELLSSYEFNGDDIPIISGSALLAVETLTENPKVK**  
 RGDNKWVDKIYELMDAVDDYIPI**QRQTELPFLLA**VEDVFSITGRGTVAITGRVERGTVKVGETVDLVGLRETRSYVTGVMFQKILDEAL**AGDNVGLLLRGIQKADIQR**GMVLAKPGSITPHTKFEA  
 IIVVLK**EEGGRHSPFFAGYRQIFY**MRTTDTVTGKVKIKIMNDKDEESKMVMPGDRVK**IVVELIVPVACEQGMRF**AIREGGKTVGAGVIGTILE

# gi|414103 Myrosinase

## Proteins Detected

| N | Unu... | Total | % Cov | Accession # | Name                                             | Species        | Peptides(95%) | Biological Processes | Molecular Functions | PANTHER ID |
|---|--------|-------|-------|-------------|--------------------------------------------------|----------------|---------------|----------------------|---------------------|------------|
| 1 | 18.20  | 18.20 | 86.7  | gi 22595    | myrosinase [Brassica napus]                      | Brassica napus | 28            |                      |                     |            |
| 2 | 10.86  | 10.86 | 61.2  | gi 8745521  | ribulose-1,5-bisphosphate carboxylase/oxygena... | Brassica napus | 10            |                      |                     |            |

## Protein Group 1 - myrosinase [Brassica napus]

| Proteins in Group |        |       |             |   | Peptides in Group |      |                                    |                                                                             |               |         |            |   |    |              |  |
|-------------------|--------|-------|-------------|---|-------------------|------|------------------------------------|-----------------------------------------------------------------------------|---------------|---------|------------|---|----|--------------|--|
| N                 | Unu... | Total | Accession # |   | Con...            | Conf | Sequence                           | Modifications                                                               | Cleavages     | ΔMass   | Prec MW    | z | Sc | Spectrum     |  |
| 1                 | 18.20  | 18.20 | gi 22595    | m | 2.00              | 99   | ADEEITCEENNPFCSNTDILSSK            | Asp->Ser@2<br>ICAT-C(C)@7<br>Asn->Ser@11<br>ICAT-C(C)@15                    |               | 0.2045  | 3058.57... | 3 | 17 | 1.1.1.1849.3 |  |
| 1                 | 0.00   | 18.20 | gi 127733   | M |                   |      |                                    |                                                                             |               |         |            |   |    |              |  |
| 39                | 1.55   | 3.57  | gi 15239559 | m |                   |      |                                    |                                                                             |               |         |            |   |    |              |  |
|                   |        |       |             |   | 2.00              | 99   | AGSD LKNGD TTCESYTR                | Deamidated(N)@7<br>ICAT-C:13C(9)(C)@12                                      | missed K-N... | 0.1313  | 2054.06... | 3 | 18 | 4.1.1.1358.2 |  |
|                   |        |       |             |   | 2.00              | 99   | CS PMVDTKRCYGGNS STEP YIVAHNQLL... | No ICAT(C)@1<br>Oxidation(M)@4<br>Oxidation(H)@9<br>ICAT-C(C)@11            | missed K-H... | 1.2442  | 4605.44... | 4 | 21 | 5.1.1.1437.2 |  |
|                   |        |       |             |   | 2.00              | 99   | DEEITCEENNPFCSNTDILSSK             | ICAT-C:13C(9)(C)@6<br>Deamidated(N)@9<br>Asn->Ser@10<br>ICAT-C:13C(9)(C)@14 | cleaved A-... | -0.8251 | 3033.55... | 3 | 18 | 1.1.1.1826.2 |  |
|                   |        |       |             |   | 2.00              | 99   | IDYLCSHLCFLR                       | ICAT-C(C)@5<br>ICAT-C(C)@9                                                  |               | 0.1146  | 1936.08... | 3 | 16 | 4.1.1.1460.2 |  |
|                   |        |       |             |   | 2.00              | 99   | QIIQDFKDYADLCFK                    | Gln->pyro-Glu@N-term<br>ICAT-C(C)@13                                        |               | 0.0482  | 2056.04... | 2 | 21 | 5.1.1.1513.4 |  |
|                   |        |       |             |   | 2.00              | 99   | QIIQDFKDYADLCFKEFGGK               | Gln->pyro-Glu@N-term<br>ICAT-C:13C(9)(C)@13                                 |               | 0.0141  | 2583.29... | 3 | 27 | 5.1.1.1523.2 |  |
|                   |        |       |             |   | 1.52              | 97   | CSQWVKRCYGGDSSTEPYIVAHNQLLAH...    | ICAT-C(C)@1<br>Oxidation(W)@4<br>ICAT-C(C)@9<br>Asp->Gly@13                 | missed K-R... | -0.6790 | 4605.56... | 4 | 17 | 4.1.1.1454.4 |  |
|                   |        |       |             |   | 1.52              | 97   | NGDTTCESYTR                        | ICAT-C:13C(9)(C)@6                                                          |               | 0.0651  | 1481.71... | 2 | 13 | 5.1.1.1316.3 |  |

## Protein Sequence Coverage - myrosinase [Brassica napus]

MKLLHGLALVFLLAASCKADEEITCEENNPFCSNTDILSSKNGFKDFIFGVASSAYQIEGGRGRGVNVWDGFSHRYPEKAGSDLKNGD TTCESYTRWQKDVDMGELNATGYRFSFAWSRIIPKGG  
VSRGVNQGLDYHKLIDALLEKNITPFVTLFHWDLPTLQDEYEGFLDRQIIQDFKDYADLCFKEFGGKVKHWITINQLYTVPTRGYAI GTDAPGRCS PMVDTKRCYGGNSSTEPYIVAHNQLLAH  
ATVVDLYR TKYKFKQKGI GPVMITR WFLPFDES DPASIEAAERMNQFFHGWYMEPLTKGRYPDIMRQIVGSR LPNFTEEEAE L VAGSYDFLGLNYVVTQYAPKPNPYPSEHTAMMDAGVKLYTDNS  
RGEFLGPLFVEDKVN GNS YYPKGIYVMDYFKTKYGDPLIYVTENG FSTPSS ENREQAIADYKRIDYLCSHLCFLR KVIKEKGVNVRGYFAWALGDN YBFC KGFVTRFGLSYVNWEDLDRNLKESG  
KWYQRFINGTVKNAV KQDFLRSSLSQSQRKFADA

# gi|4928472 Type 2 peroxiredoxin

## Proteins Detected

| N  | Unu... | Total | %... | Accession # | Name                                           | Species              | Peptides(95%) | Biological Processes | Molecular Functions | PANTHER ID |
|----|--------|-------|------|-------------|------------------------------------------------|----------------------|---------------|----------------------|---------------------|------------|
| 37 | 1.72   | 1.72  | 93.8 | gi 119980   | Ferredoxin                                     | BRANA                | 1             |                      |                     |            |
| 34 | 2.00   | 2.00  | 92.6 | gi 83032224 | unknown [Brassica rapa]                        | Brassica rapa        | 1             |                      |                     |            |
| 28 | 2.00   | 2.00  | 91.5 | gi 15231702 | monodehydroascorbate reductase (NADH)- like... | Arabidopsis thaliana | 1             |                      |                     |            |

## Protein Group 34 - unknown [Brassica rapa]

| Proteins in Group |        |       |             |                         |             | Peptides in Group |      |                                    |                                        |               |         |
|-------------------|--------|-------|-------------|-------------------------|-------------|-------------------|------|------------------------------------|----------------------------------------|---------------|---------|
| N                 | Unu... | Total | Accession # | Name                    | Specie      | Con...            | Conf | Sequence                           | Modifications                          | Cleavages     | ΔMass   |
| 34                | 2.00   | 2.00  | gi 83032224 | unknown [Brassica r...  | Brassica ra | 2.00              | 99   | VILFGVPGAFTPTCSMK                  | ICAT-C:13C(9)(C)@14<br>Oxidation(M)@16 |               | 0.1046  |
| 34                | 0.00   | 2.00  | gi 4928472  | type 2 peroxiredoxin... | Brassica ra | 0.00              | <1   | APIAVGDVWPDGSI SF FDENDQLQTVSVH... |                                        | cleaved M-... | -0.3696 |
|                   | 0.00   | 2.00  | gi 15218877 | type 2 peroxiredoxin... | Arabidopsis | 0.00              | <1   | AWGKTYPENKHVKFVADGSGEYTHLLGLE...   | Oxidation(H)@11                        | missed K-T... | -0.0163 |

## Protein Sequence Coverage - type 2 peroxiredoxin [Brassica rapa subsp. pekinensis]

MAPIAVGDVWPDGSI SF FDENDQLQTVSVHSLAAGKKVILFGVPGAFTPTCSMKHVPGFIEKAEELKSKGVDEIICFSVNDPFVMKAWGKTYPENKHVKFVADGSGEYTKLLGLELDLKD KGLGVRSR  
RFALLIDLNLKVTIVANVESGGEFTVSSADDILKAL

## Fragmentation Evidence

VILFGVPGAFTPTC[C9]SM[Oxi]K

| Residue | b         | b+2       | y         | y+2       |
|---------|-----------|-----------|-----------|-----------|
| V       | 100.0757  | 50.5415   | 2020.0693 | 1010.5383 |
| I       | 213.1598  | 107.0835  | 1921.0009 | 961.0041  |
| L       | 326.2438  | 163.6255  | 1807.9168 | 904.4621  |
| F       | 473.3122  | 237.1598  | 1694.8328 | 847.9200  |
| G       | 530.3337  | 265.6705  | 1547.7644 | 774.3858  |
| V       | 629.4021  | 315.2047  | 1490.7429 | 745.8751  |
| P       | 726.4549  | 363.7311  | 1391.6745 | 696.3409  |
| G       | 783.4763  | 392.2418  | 1294.6217 | 647.8145  |
| A       | 854.5135  | 427.7604  | 1237.6002 | 619.3038  |
| F       | 1001.5819 | 501.2946  | 1166.5631 | 583.7852  |
| T       | 1102.6295 | 551.8184  | 1019.4947 | 510.2510  |
| P       | 1199.6823 | 600.3448  | 918.4470  | 459.7272  |
| T       | 1300.7300 | 650.8686  | 821.3943  | 411.2008  |
| C[C9]   | 1639.8964 | 820.4518  | 720.3466  | 360.6769  |
| S       | 1726.9284 | 863.9678  | 381.1802  | 191.0938  |
| M[Oxi]  | 1873.9638 | 937.4855  | 294.1482  | 147.5777  |
| K       | 2002.0587 | 1001.5330 | 147.1128  | 74.0600   |

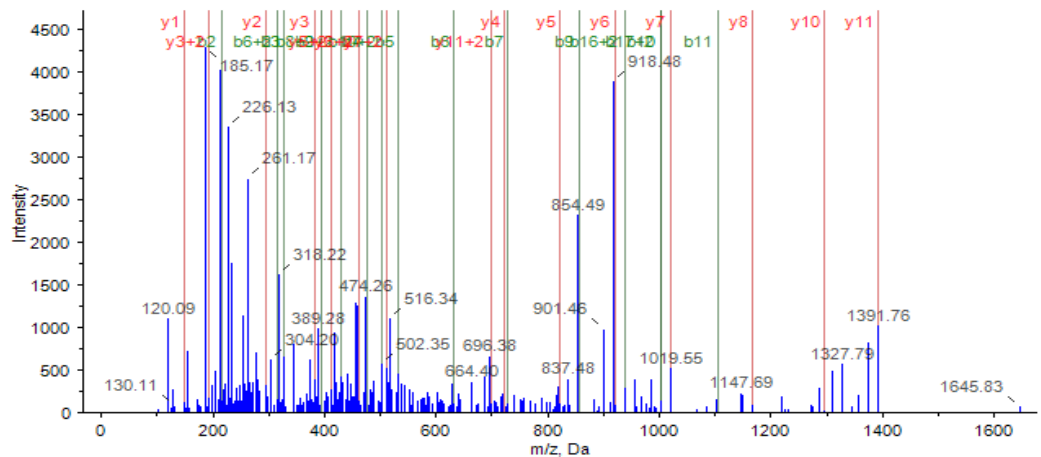

# gi|15225545 Hypothetical protein

## Proteins Detected

| N  | Unu... | Total | % Cov | Accession # | Name                                                 | Species              | Peptides(95%) | Biological Processes | Molecular Functions | PANTHER ID |
|----|--------|-------|-------|-------------|------------------------------------------------------|----------------------|---------------|----------------------|---------------------|------------|
| 21 | 2.06   | 2.06  | 51.9  | gi 15240264 | NADH dehydrogenase (ubiquinone) (EC 1.6.5.3)...      | Arabidopsis thaliana | 1             |                      |                     |            |
| 22 | 2.02   | 2.02  | 73.3  | gi 15225545 | hypothetical protein [Arabidopsis thaliana]          | Arabidopsis thaliana | 1             |                      |                     |            |
| 23 | 2.02   | 2.02  | 54.2  | gi 15241492 | formate dehydrogenase (FDH)[Arabidopsis thali...     | Arabidopsis thaliana | 2             |                      |                     |            |
| 24 | 2.01   | 2.01  | 61.8  | gi 15242723 | putative protein [Arabidopsis thaliana]              | Arabidopsis thaliana | 1             |                      |                     |            |
| 25 | 2.01   | 2.01  | 67.3  | gi 4704613  | monodehydroascorbate reductase [Brassica jun...      | Brassica juncea      | 1             |                      |                     |            |
| 26 | 2.01   | 2.01  | 41.0  | gi 15239843 | cytosolic malate dehydrogenase[Arabidopsis th...     | Arabidopsis thaliana | 2             |                      |                     |            |
| 27 | 2.00   | 2.00  | 74.5  | gi 15233891 | probable H+-transporting ATPase[Arabidopsis t...     | Arabidopsis thaliana | 3             |                      |                     |            |
| 28 | 2.00   | 2.00  | 91.5  | gi 15231702 | monodehydroascorbate reductase (NADH)- like...       | Arabidopsis thaliana | 1             |                      |                     |            |
| 29 | 2.00   | 2.00  | 50.8  | gi 15235763 | leucyl aminopeptidase - like protein [Arabidopsis... | Arabidopsis thaliana | 1             |                      |                     |            |

## Protein Group 22 - hypothetical protein [Arabidopsis thaliana]

| Proteins in Group |        |       |             |                         | Peptides in Group |      |                                 |                                                            |               |        |            |
|-------------------|--------|-------|-------------|-------------------------|-------------------|------|---------------------------------|------------------------------------------------------------|---------------|--------|------------|
| N                 | Unu... | Total | Accession # | Name                    | Con...            | Conf | Sequence                        | Modifications                                              | Cleavages     | ΔMass  | Prec MW    |
| 22                | 2.02   | 2.02  | gi 15225545 | hypothetical protein... | 2.00              | 99   | MCCLFINDLDAGAGR                 | Oxidation(M)@1<br>ICAT-C:13C(9)(C)@2<br>ICAT-C:13C(9)(C)@3 |               | 0.0897 | 2086.10... |
|                   |        |       |             |                         | 0.02              | 5    | SFQCELVMAK                      | ICAT-C:13C(9)(C)@4<br>Oxidation(M)@8                       |               | 0.0538 | 1406.75... |
|                   |        |       |             |                         | 0.00              | < 1  | APLSLNGSGSGAVSAPASTFLGKKVTVS... | Deamidated(N)@6                                            | cleaved L-... | 0.5910 | 4527.00... |

## Protein Sequence Coverage - hypothetical protein [Arabidopsis thaliana]

MA**A**AVSTVGAINRAPLSLNGSGSGAVSAPASTFLGKKVTVSRFAQSNKKSNGSFKVLAVKEDKQTDGDRWRGLAYDTSDDQDITRKGGMVDSVFQAPMGTGTHHAVLSSYEVVSQGLRQYNLDNMM  
 DGFYIAPAFMDKLVVHITK**N**FLTLPNIKVPLILGIWGGKGQKSFQCELVMAKMGINPIMMSAGELESGNAGEPAKLIRQRYREAADLKKKG**M**CLFLINDLDAGAGRMGGTTQYTVNNQMVNATLMN  
 IADNPTNVQLPGMYNKEENARVPIICTGNDFSTLYAPLIRDGRMEK**F**YWAPTREDRIGVCKGIFRTDKIKDEDIVTLVDQFPQGSIDFFGALRARVYDDEVRFKFEVSLGVEKIGKRLVNSREGPPVFE  
 QPEMTYEK**L**MEYGNMLVMEQENVKRVQLAETVLSQAALGDANADAGRGT**F**YGKTEEKEPSK



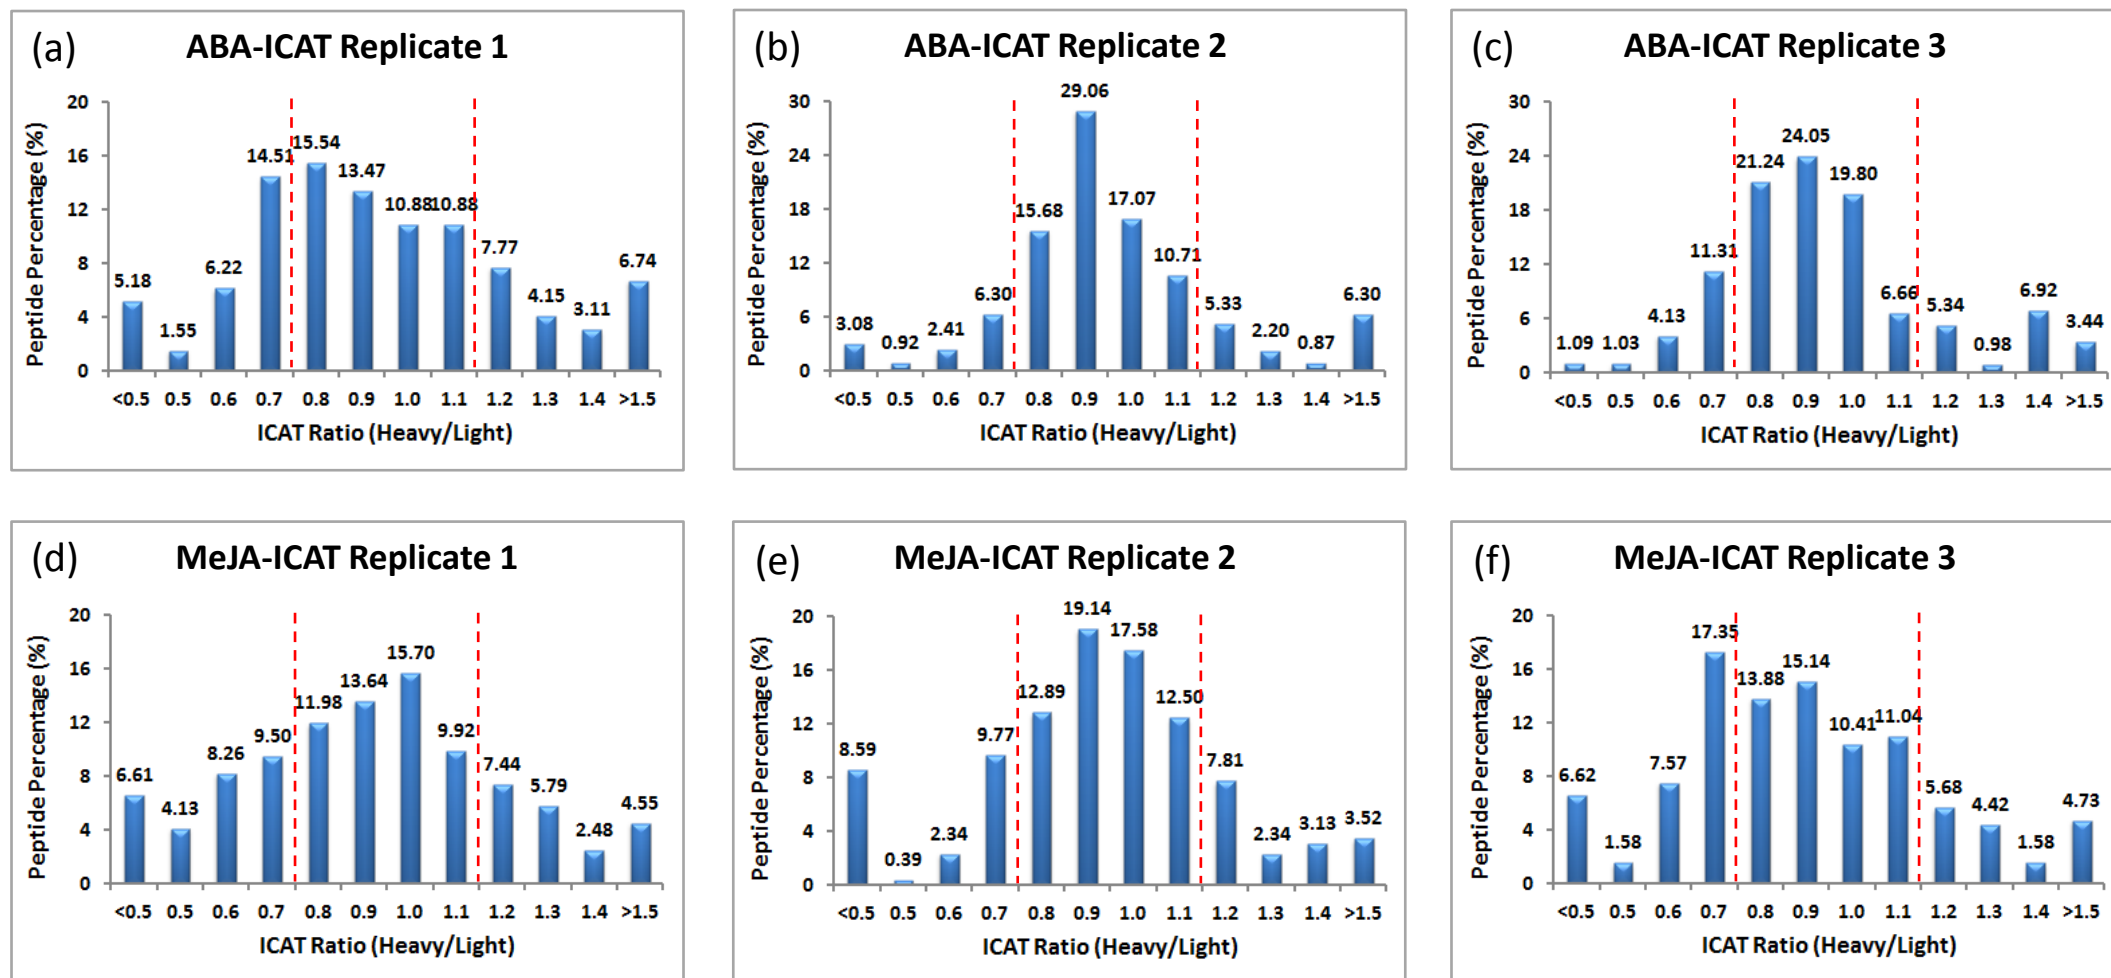

**Figure S8.** Histogram of measured ICAT ratio distribution of each experiment. (a)-(c) ICAT replicates 1, 2 and 3 of ABA treated guard cells. The overall average of the ABA-ICAT ratio is 1.023 and 71.27% of the peptides fall into the range of 0.8-1.2. (d)-(e) ICAT replicates 1, 2, and 3 of MeJA treated guard cells. The overall average of the MeJA-ICAT ratio is 1.031 and 69.54% of the peptides fall into the range of 0.8-1.2. In all six experiments, the average ICAT ratio is 1.024. Nearly 70% of the ICAT labeled peptides have the ratio within the range of 0.8-1.2. Therefore, a cut-off value of 20% change of the ICAT ion intensity (red dash in figure) was chosen to reflect the genuine quantitative differences.
